# Supplementary material for: The determination of thiocyanate in the blood plasma and holding water of Amphiprion clarkii after exposure to cyanide
Source: PubMed Central journal article supplement (PMC8663612; doi:10.7717/peerj.12409), 2021-12-07
Supplement: peerj-09-12409-s015.pdf [file peerj-09-12409-s015.pdf]

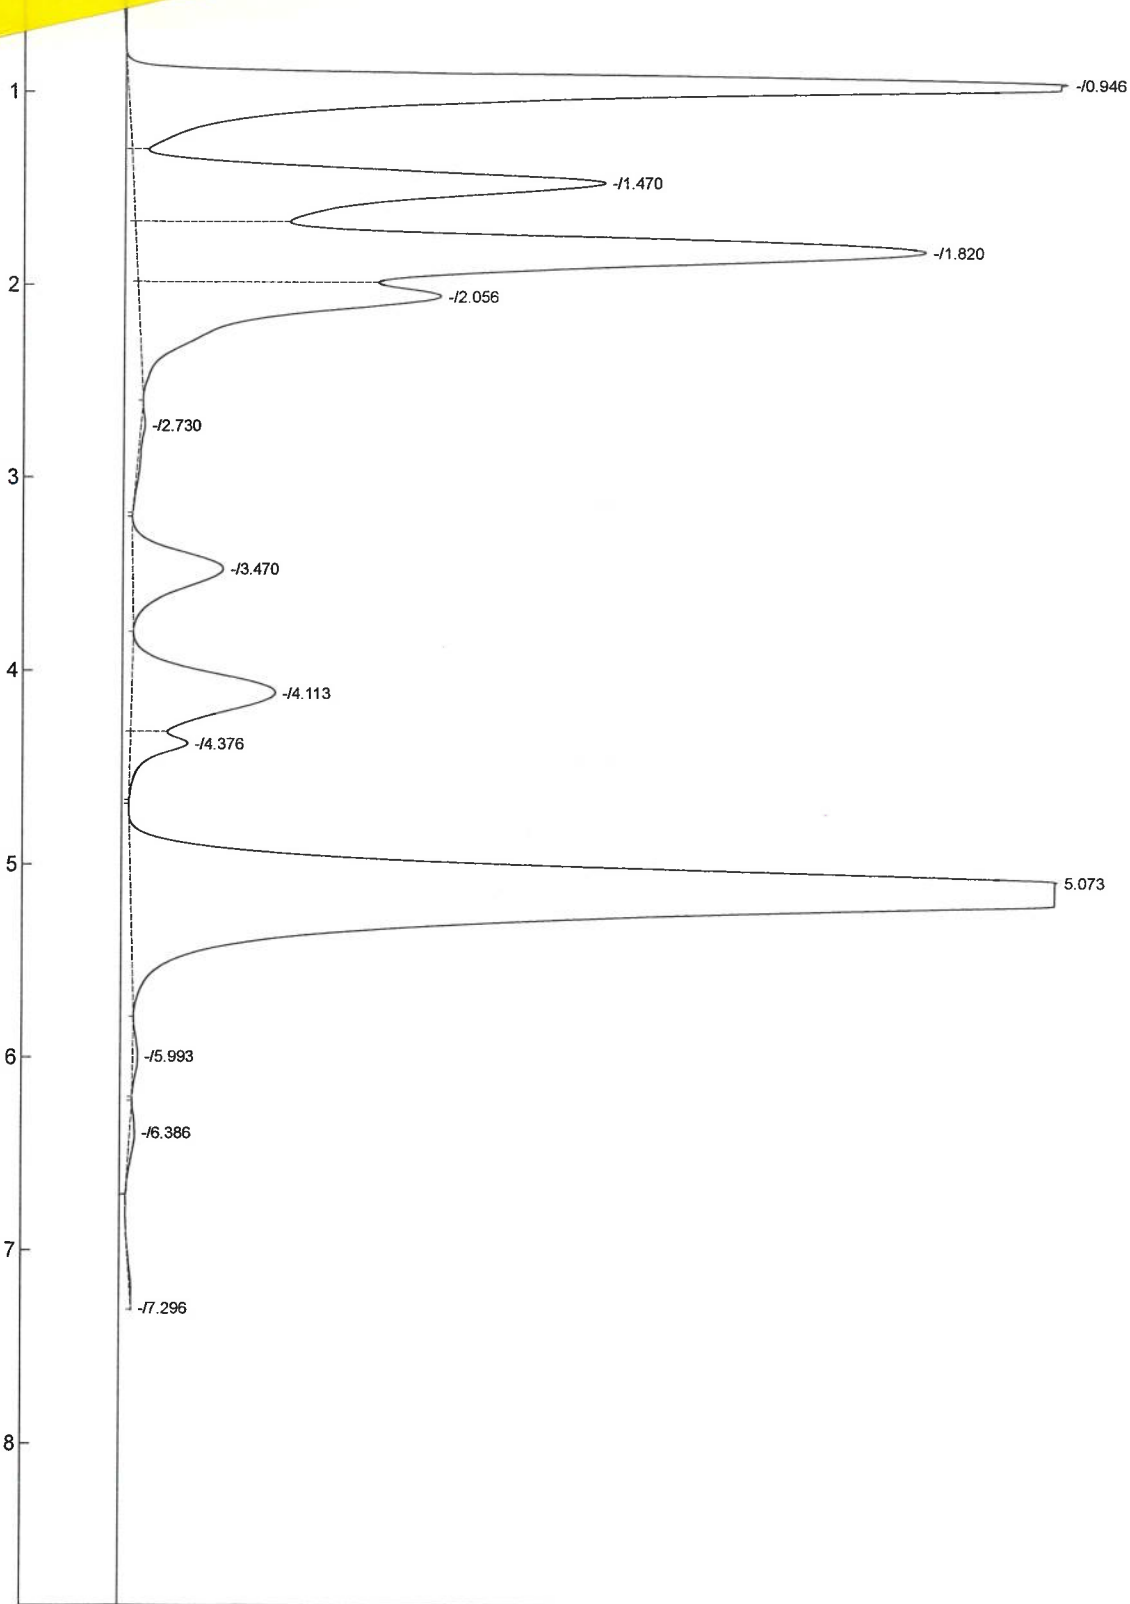

| Component | Retention | Area      | External | Units |
|-----------|-----------|-----------|----------|-------|
|           | 5.073     | 2934.9791 | 0.0000   |       |
|           |           | 2934.9791 | 0.0000   |       |

43107157  
 7/18/18  
 Flg + 09

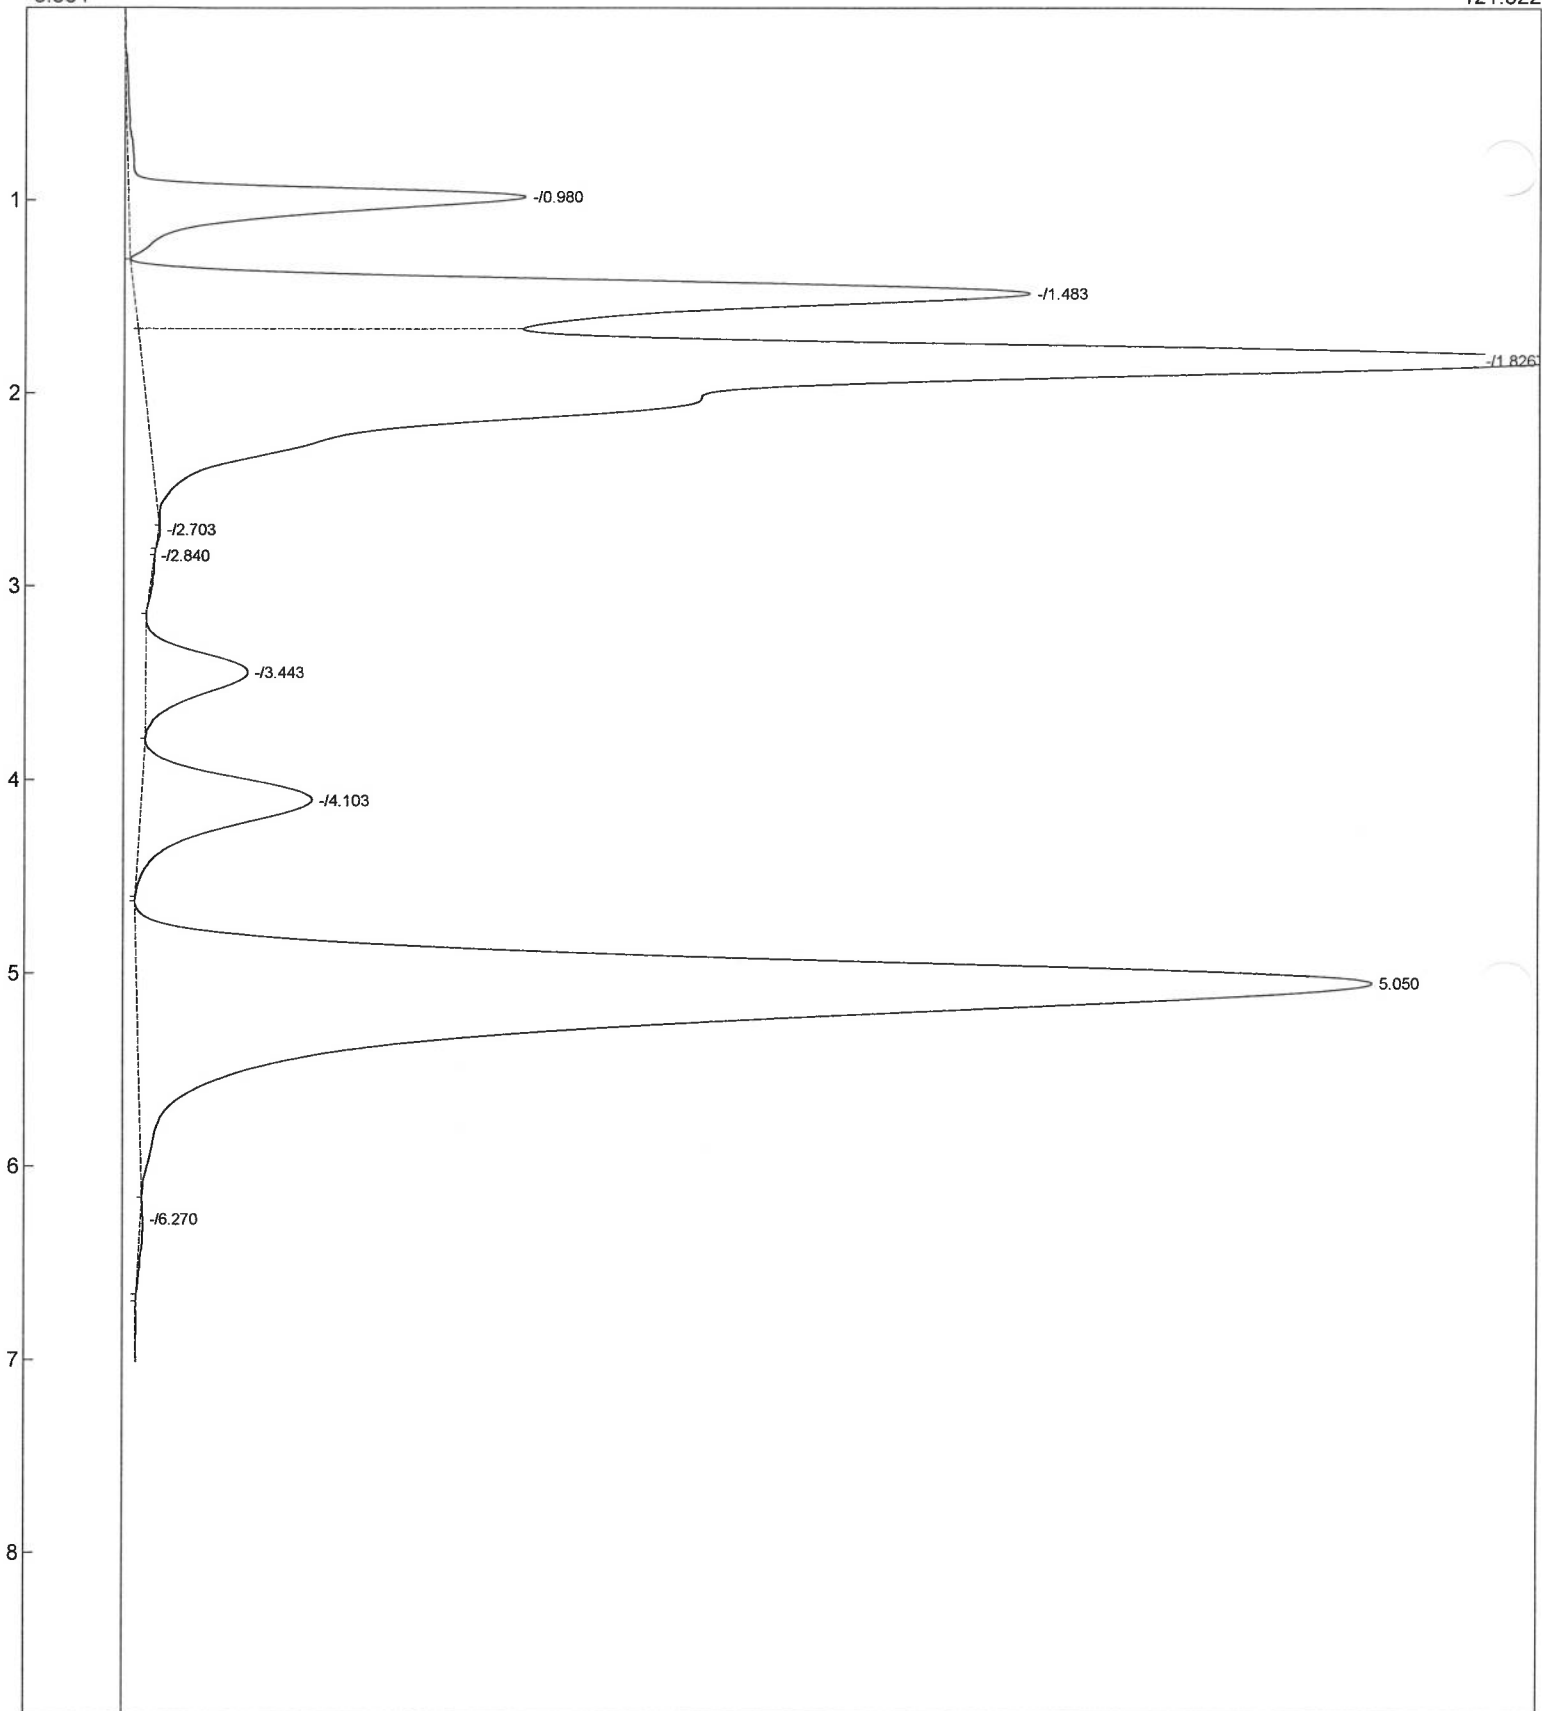

| Component | Retention | Area      | External | Units |
|-----------|-----------|-----------|----------|-------|
|           | 5.050     | 2320.5296 | 0.0000   |       |
|           | 2320.5296 | 0.0000    |          |       |

8/18/18  
158

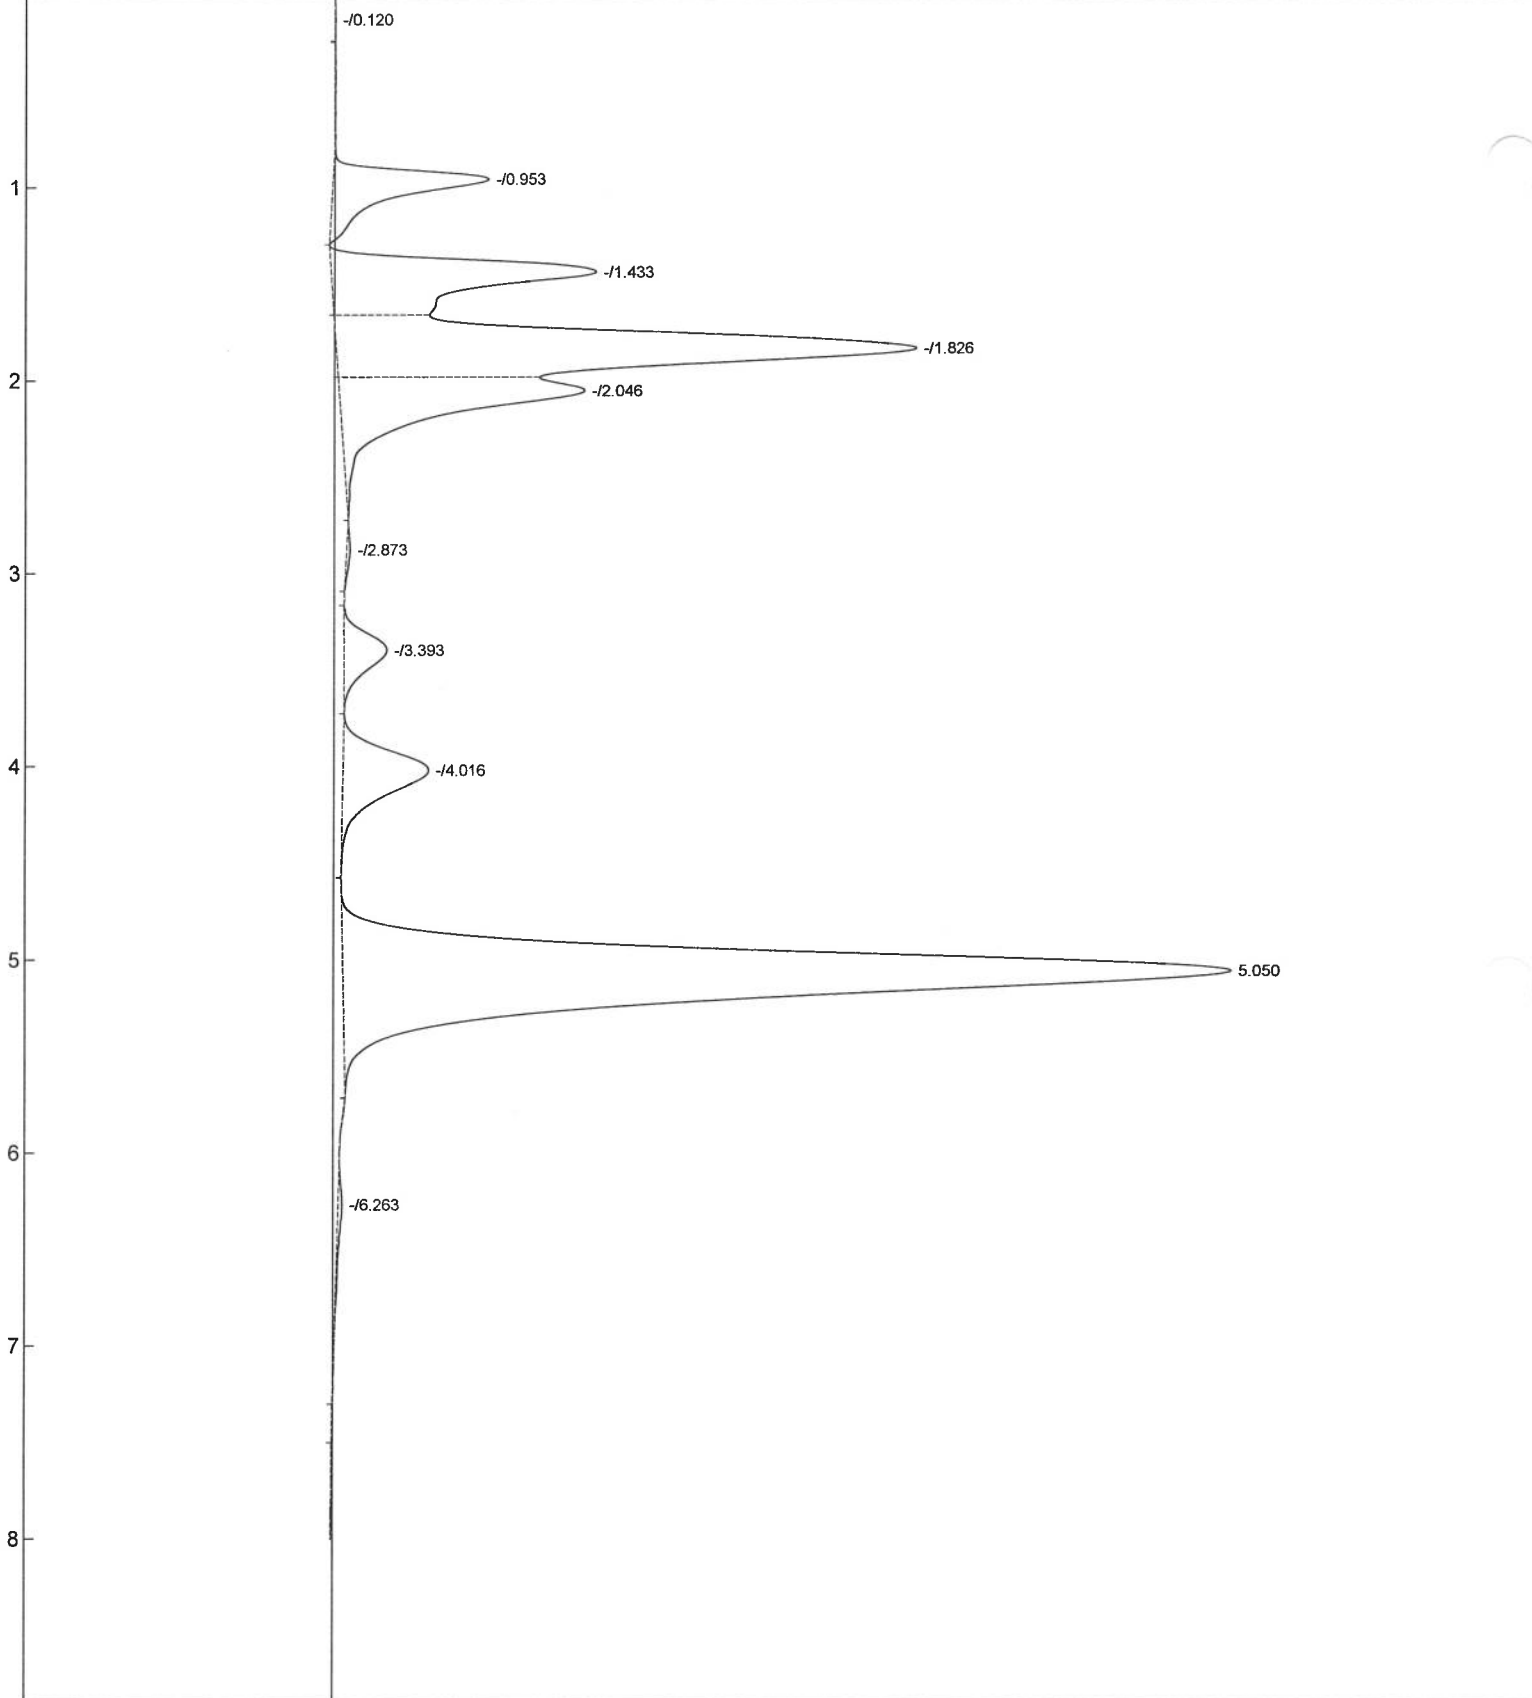

| Component | Retention | Area      | External Units |
|-----------|-----------|-----------|----------------|
|           | 5.050     | 2446.2914 | 0.0000         |
|           |           | 2446.2914 | 0.0000         |

Fish 159  
7/18/18

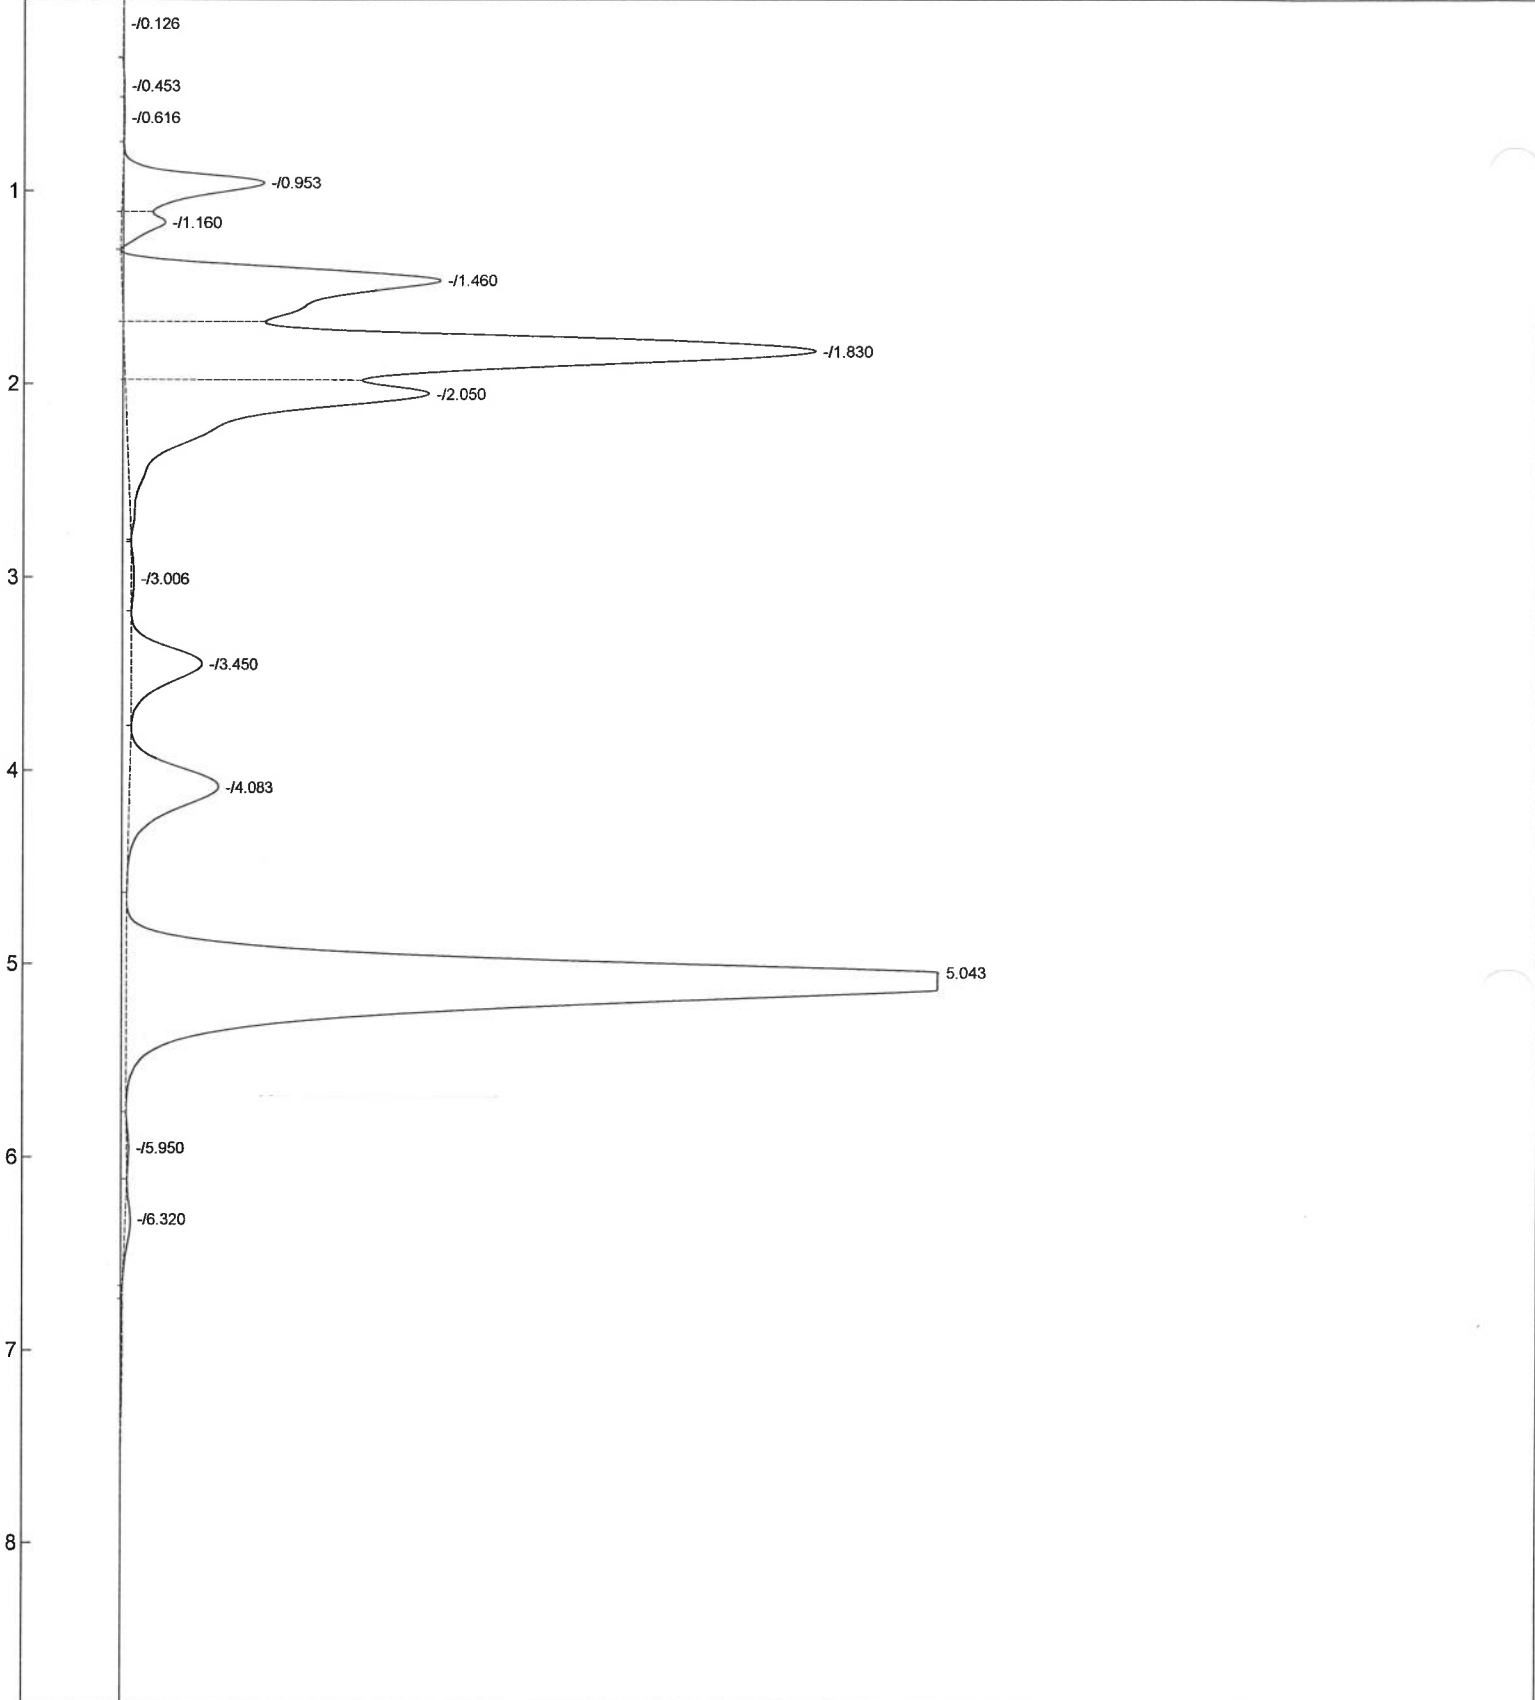

| Component | Retention | Area      | External | Units |
|-----------|-----------|-----------|----------|-------|
|           | 5.043     | 2355.9921 | 0.0000   |       |
|           | 2355.9921 | 0.0000    |          |       |

7/18/18  
160

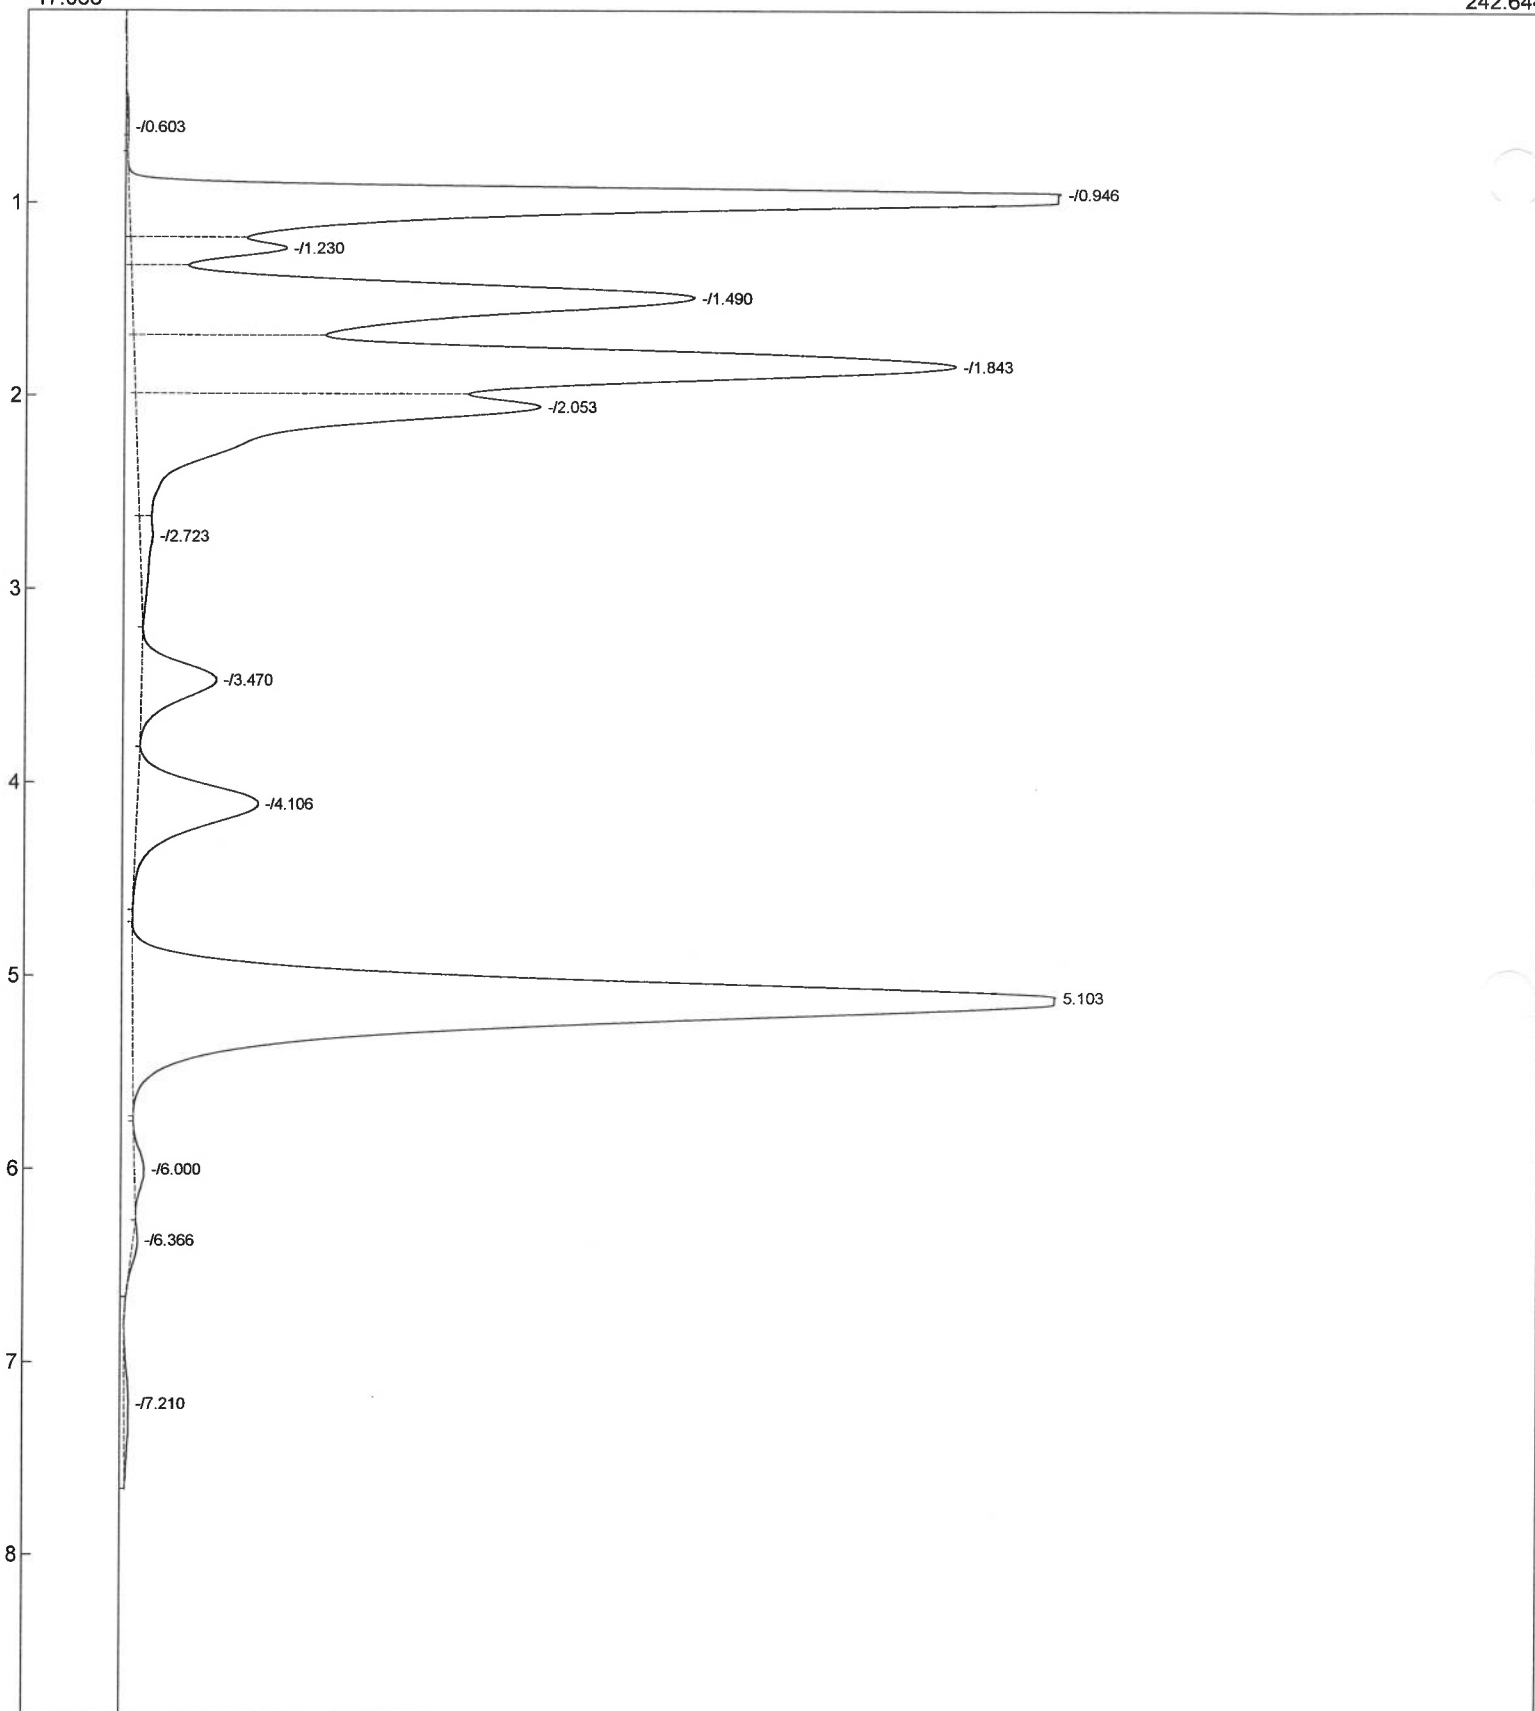

| Component | Retention | Area      | External | Units |
|-----------|-----------|-----------|----------|-------|
|           | 5.103     | 2482.7638 | 0.0000   |       |
|           |           | 2482.7638 | 0.0000   |       |

9/18/15  
161

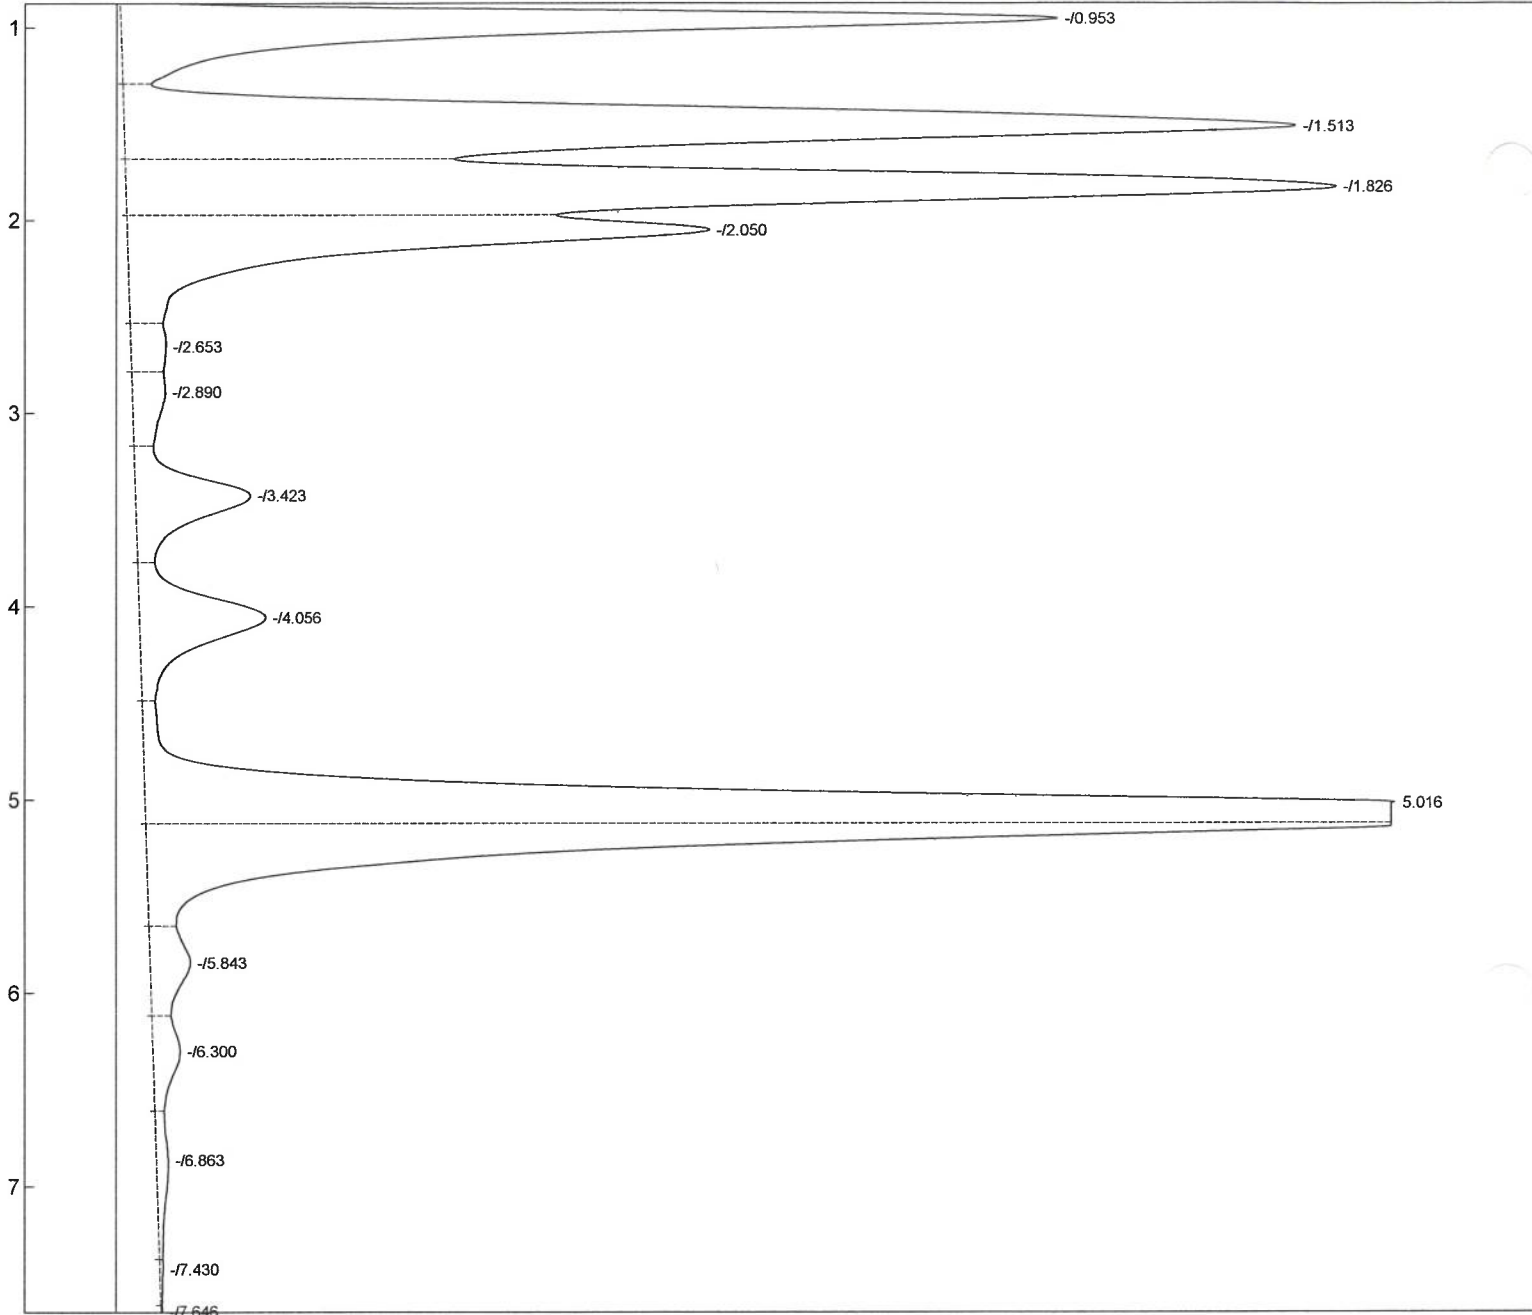

| Component | Retention | Area      | External | Units |
|-----------|-----------|-----------|----------|-------|
|           | 5.016     | 1670.2670 | 0.0000   |       |
|           | 0.000     | 0.0000    | 0.0000   |       |
|           |           | 1670.2670 | 0.0000   |       |

re-run  
 flat topped

162

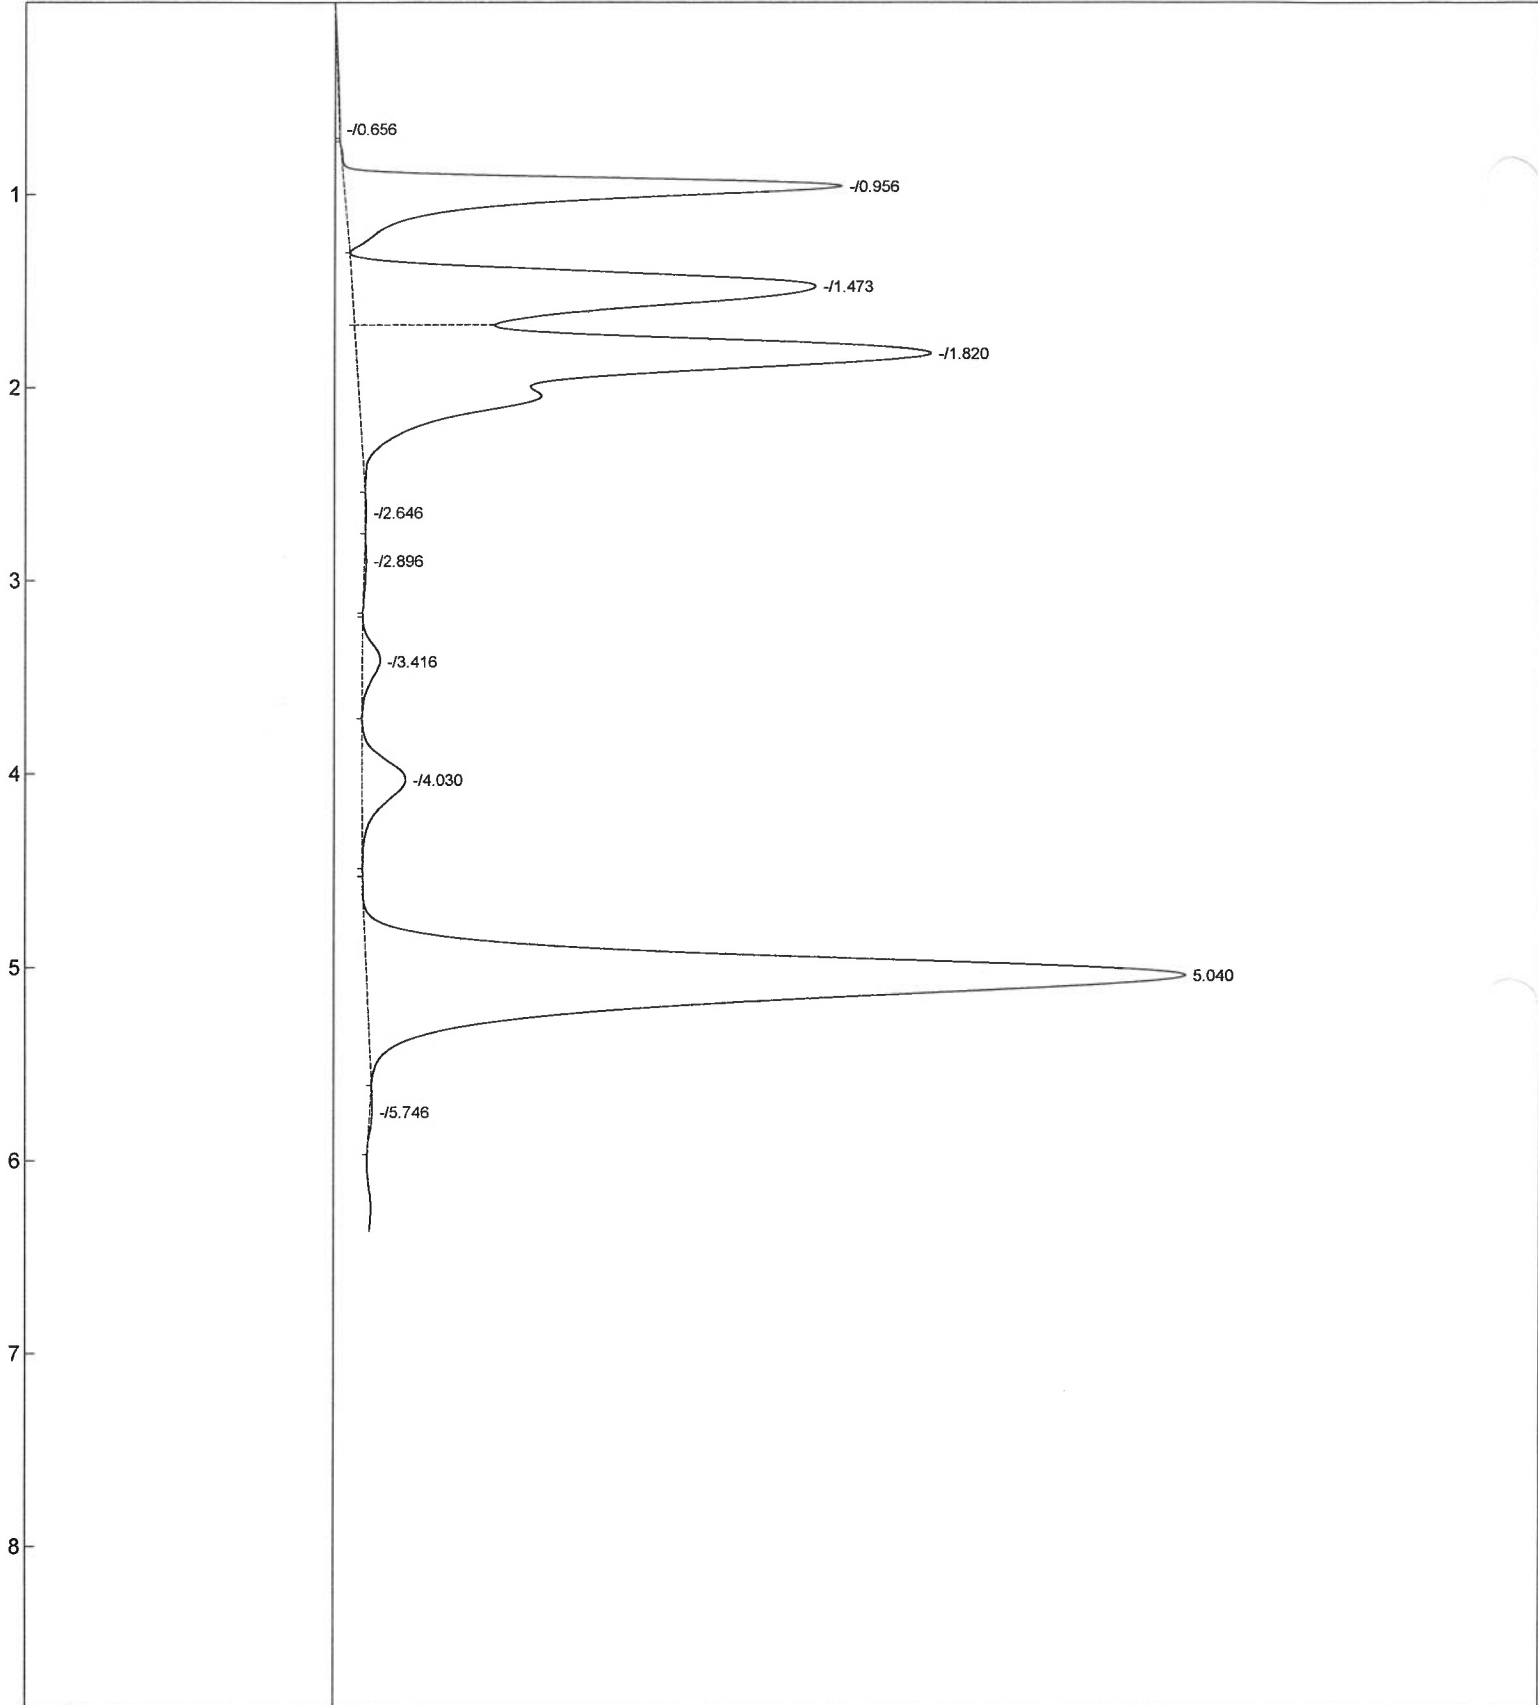

| Component | Retention | Area      | External | Units |
|-----------|-----------|-----------|----------|-------|
|           | 5.040     | 2201.2300 | 0.0000   |       |
|           |           | 2201.2300 | 0.0000   |       |

F163  
7/18/14

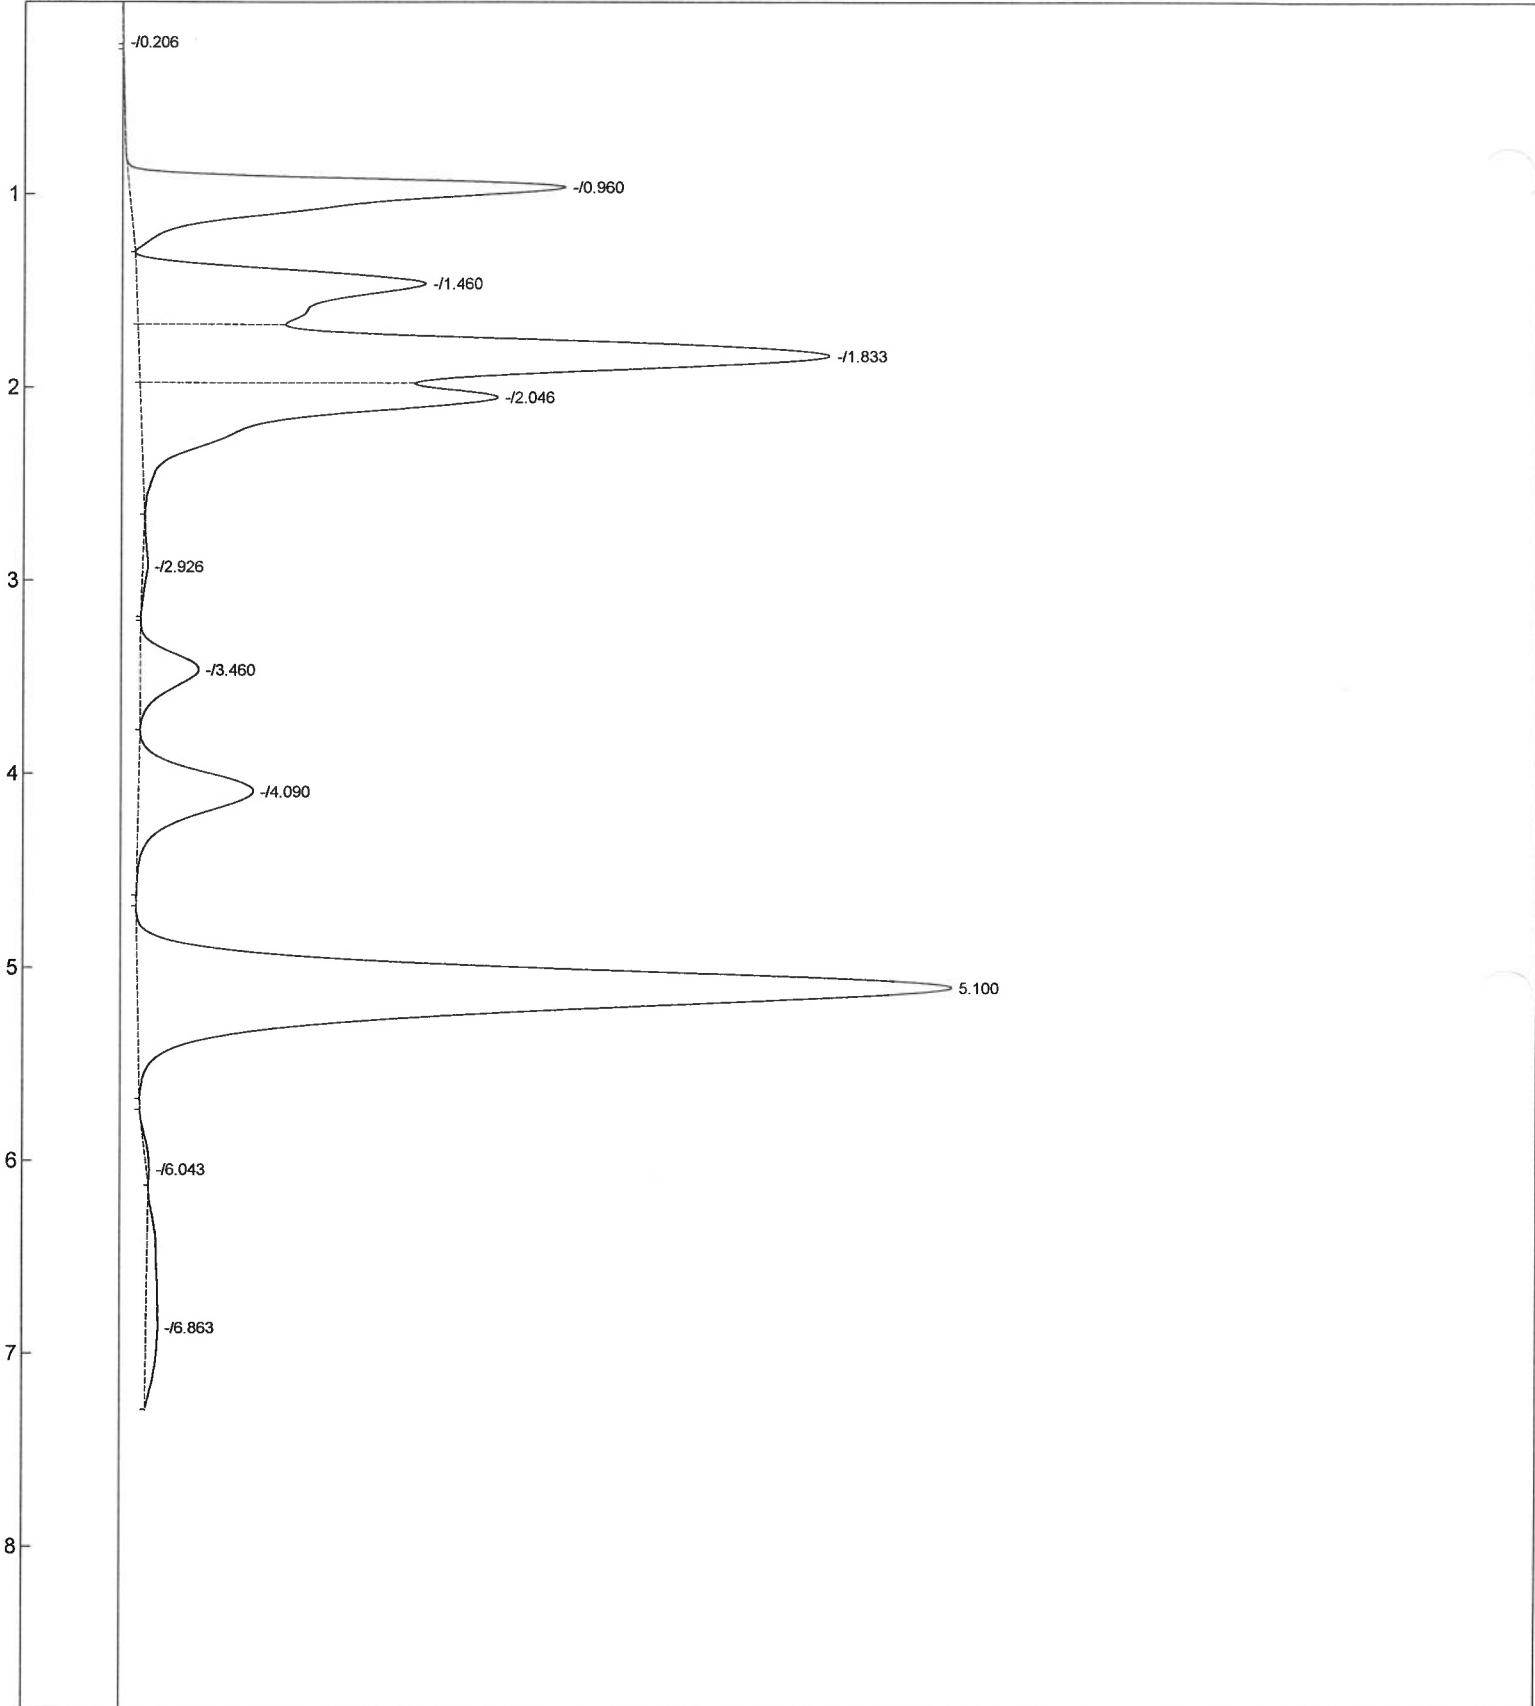

| Component | Retention | Area      | External | Units |
|-----------|-----------|-----------|----------|-------|
|           | 5.100     | 2106.2743 | 0.0000   |       |
|           |           | 2106.2743 | 0.0000   |       |

164  
7/18/18



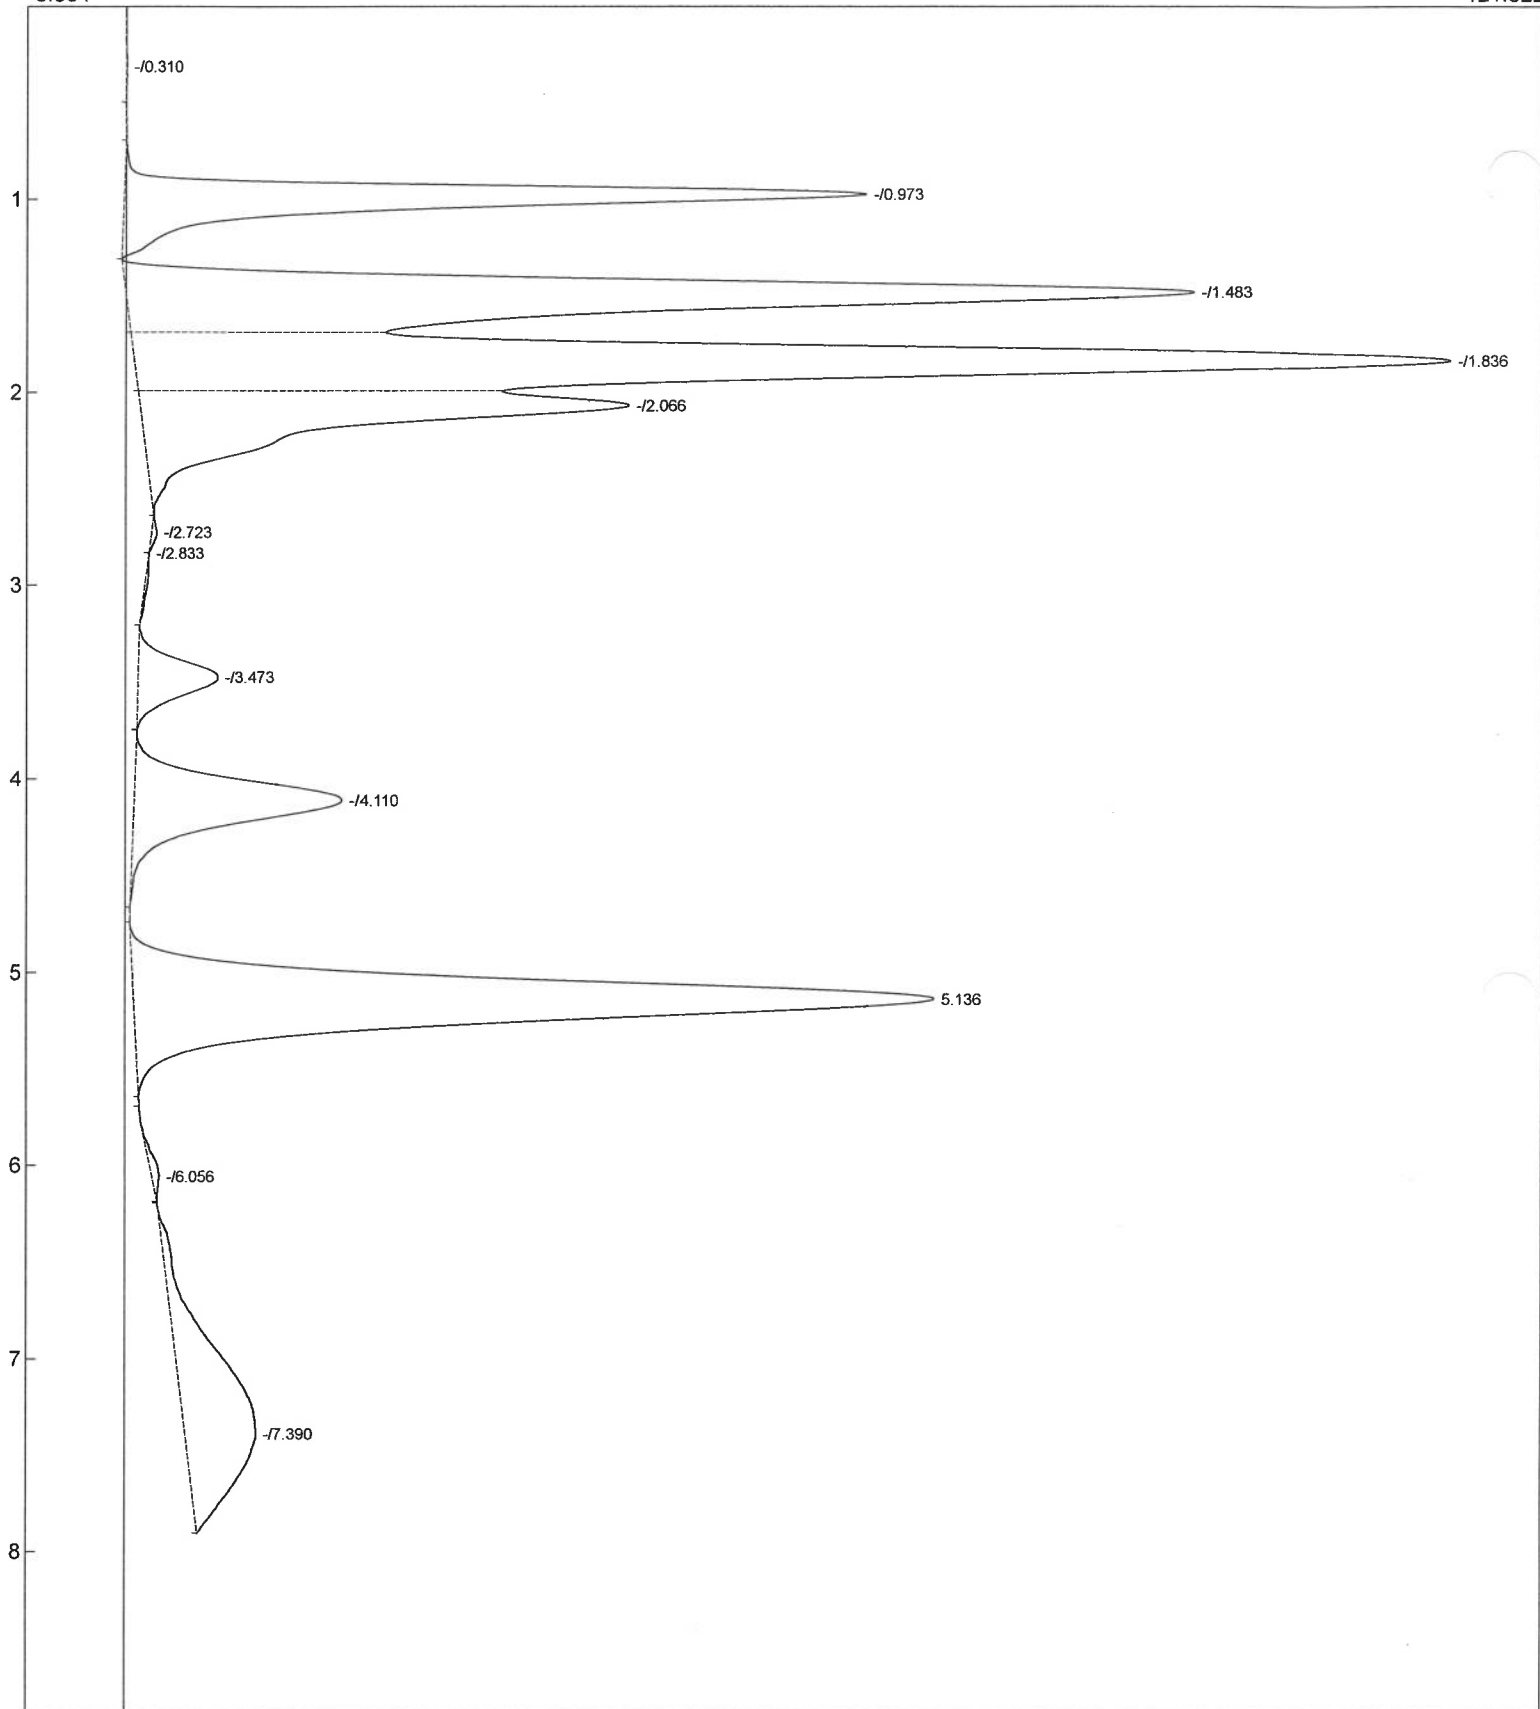

| Component | Retention | Area      | External | Units |
|-----------|-----------|-----------|----------|-------|
|           | 5.136     | 1009.6142 | 0.0000   |       |
|           |           | 1009.6142 | 0.0000   |       |

7/18/18  
165

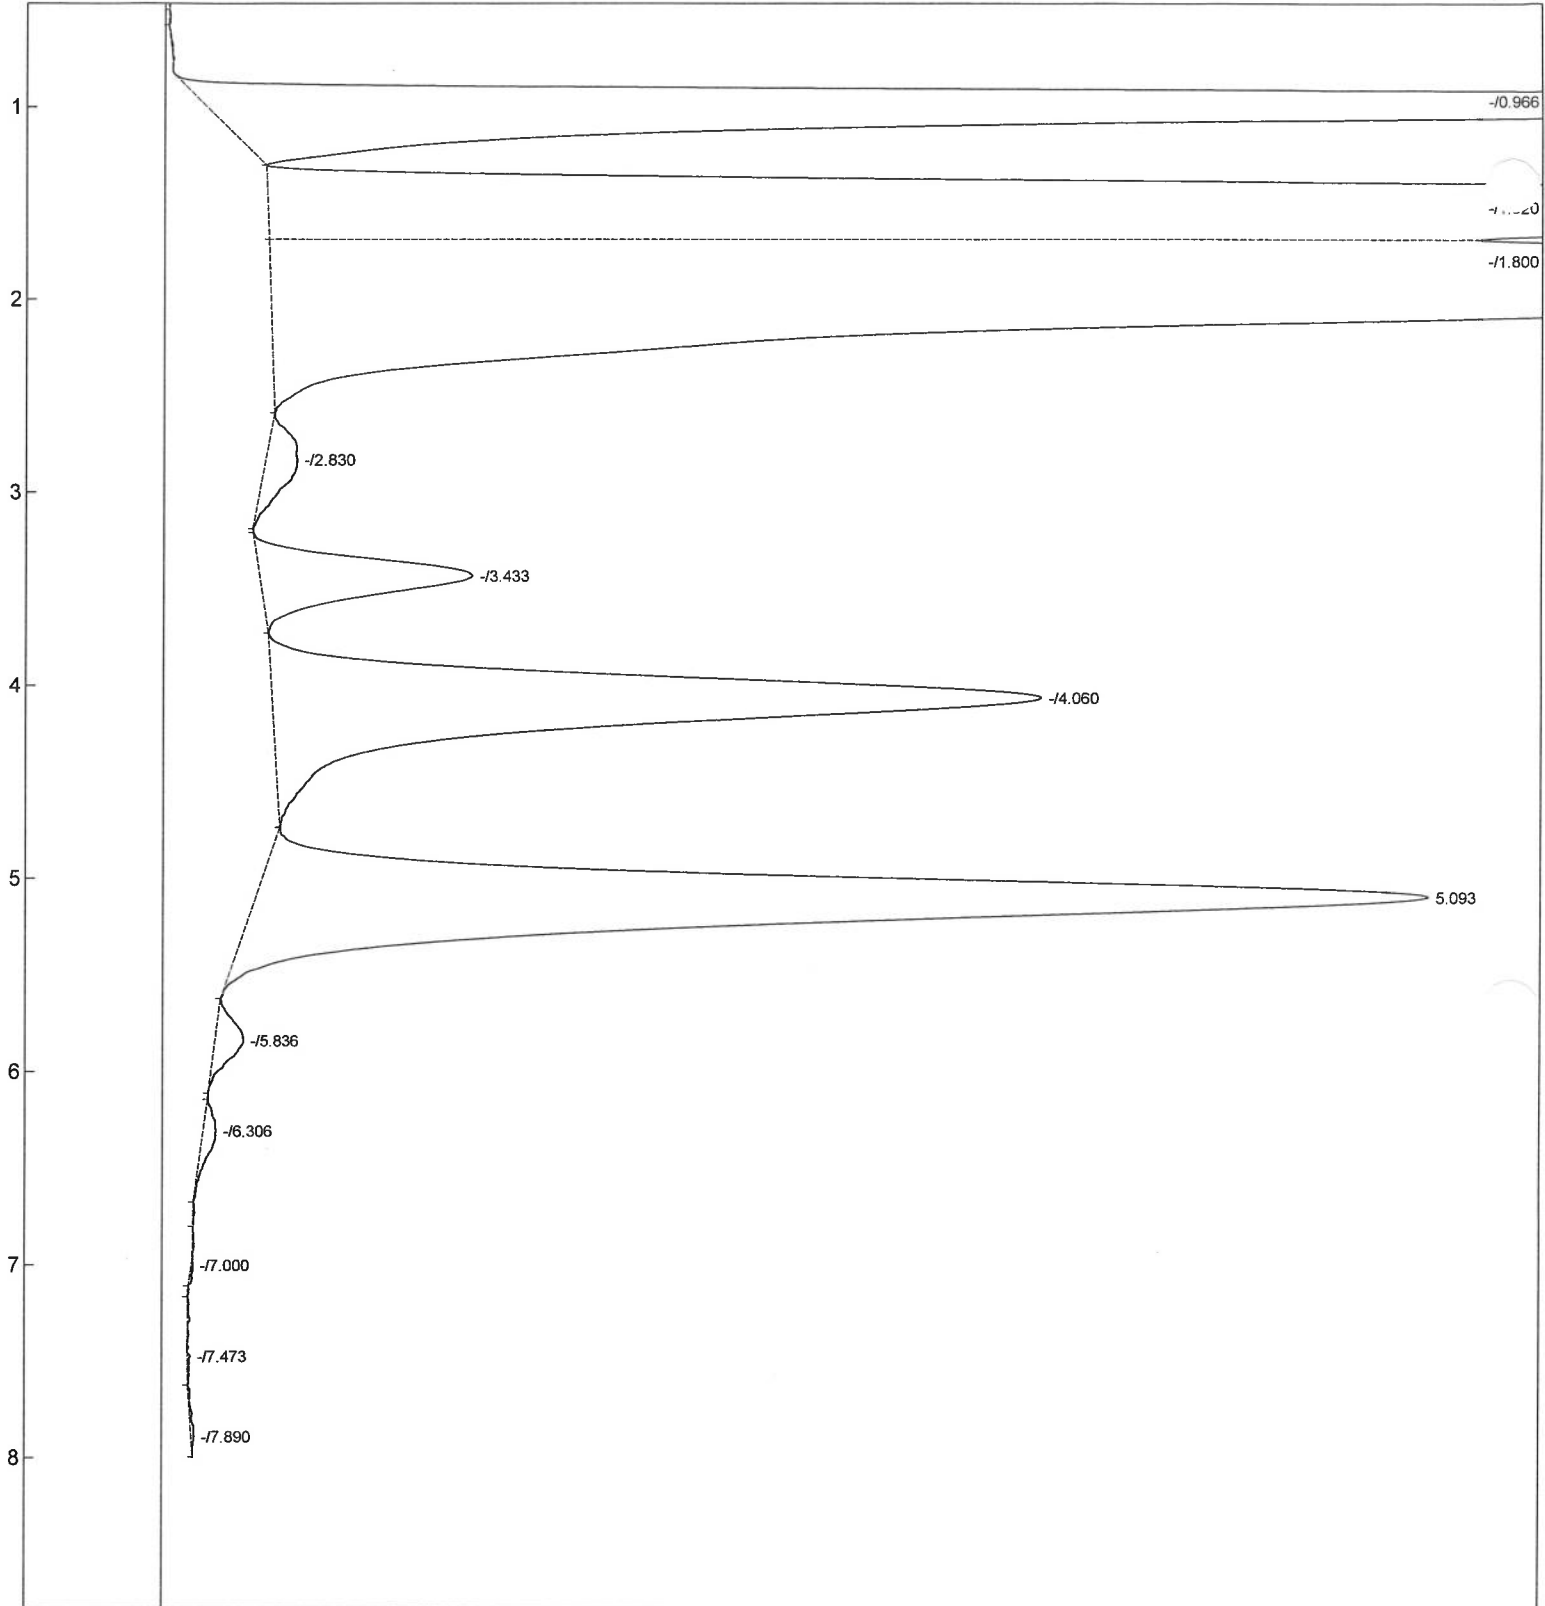

| Component | Retention | Area     | External Units |
|-----------|-----------|----------|----------------|
|           | 5.093     | 640.3717 | 0.0000         |
|           | 640.3717  | 0.0000   |                |

7/18/18  
166

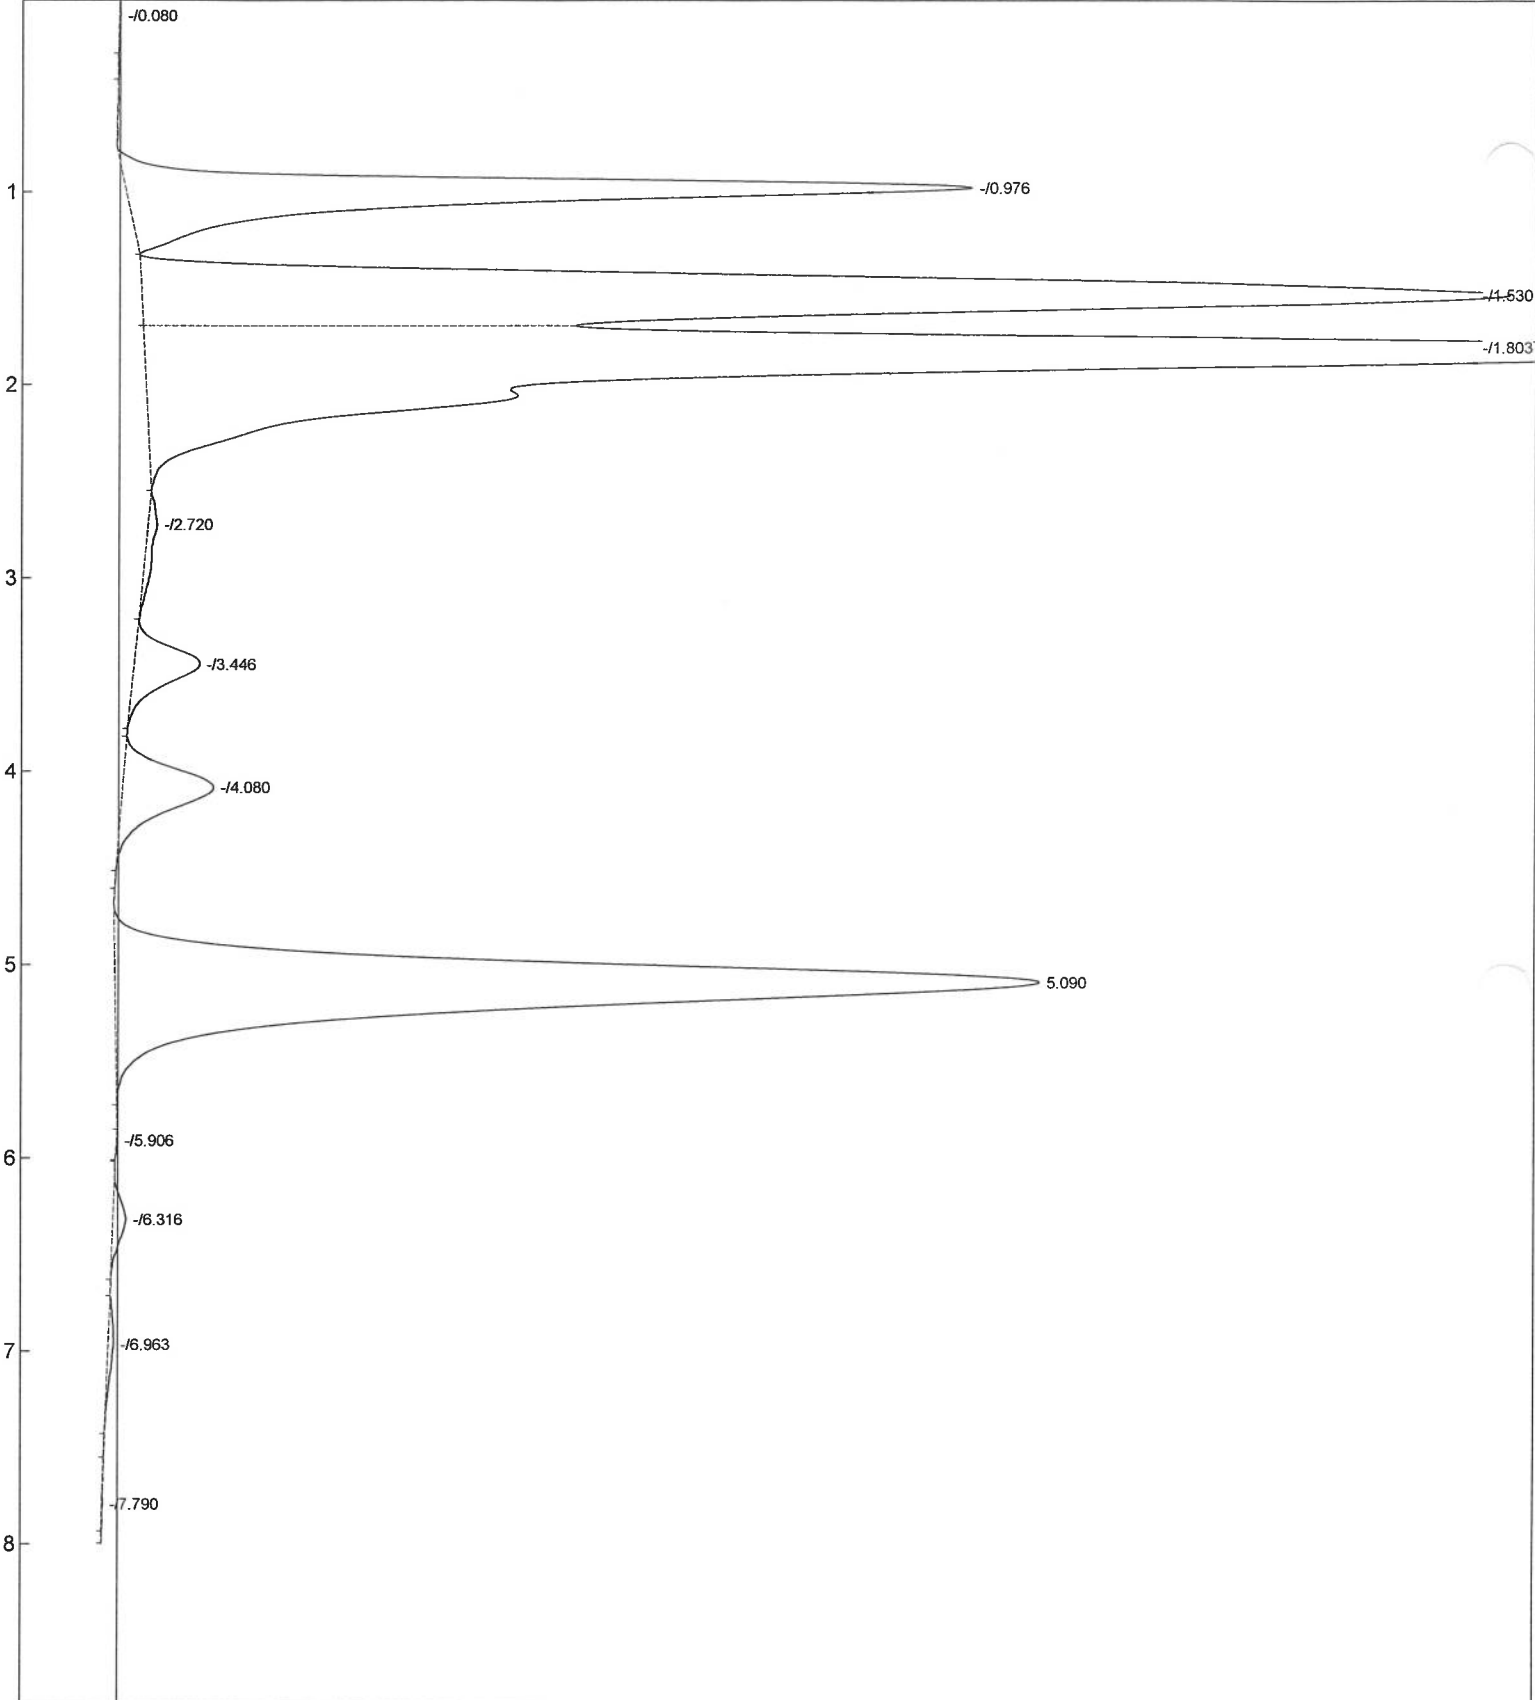

| Component | Retention | Area      | External | Units |
|-----------|-----------|-----------|----------|-------|
|           | 5.090     | 1227.9250 | 0.0000   |       |
|           |           | 1227.9250 | 0.0000   |       |

LC7  
7/18/18

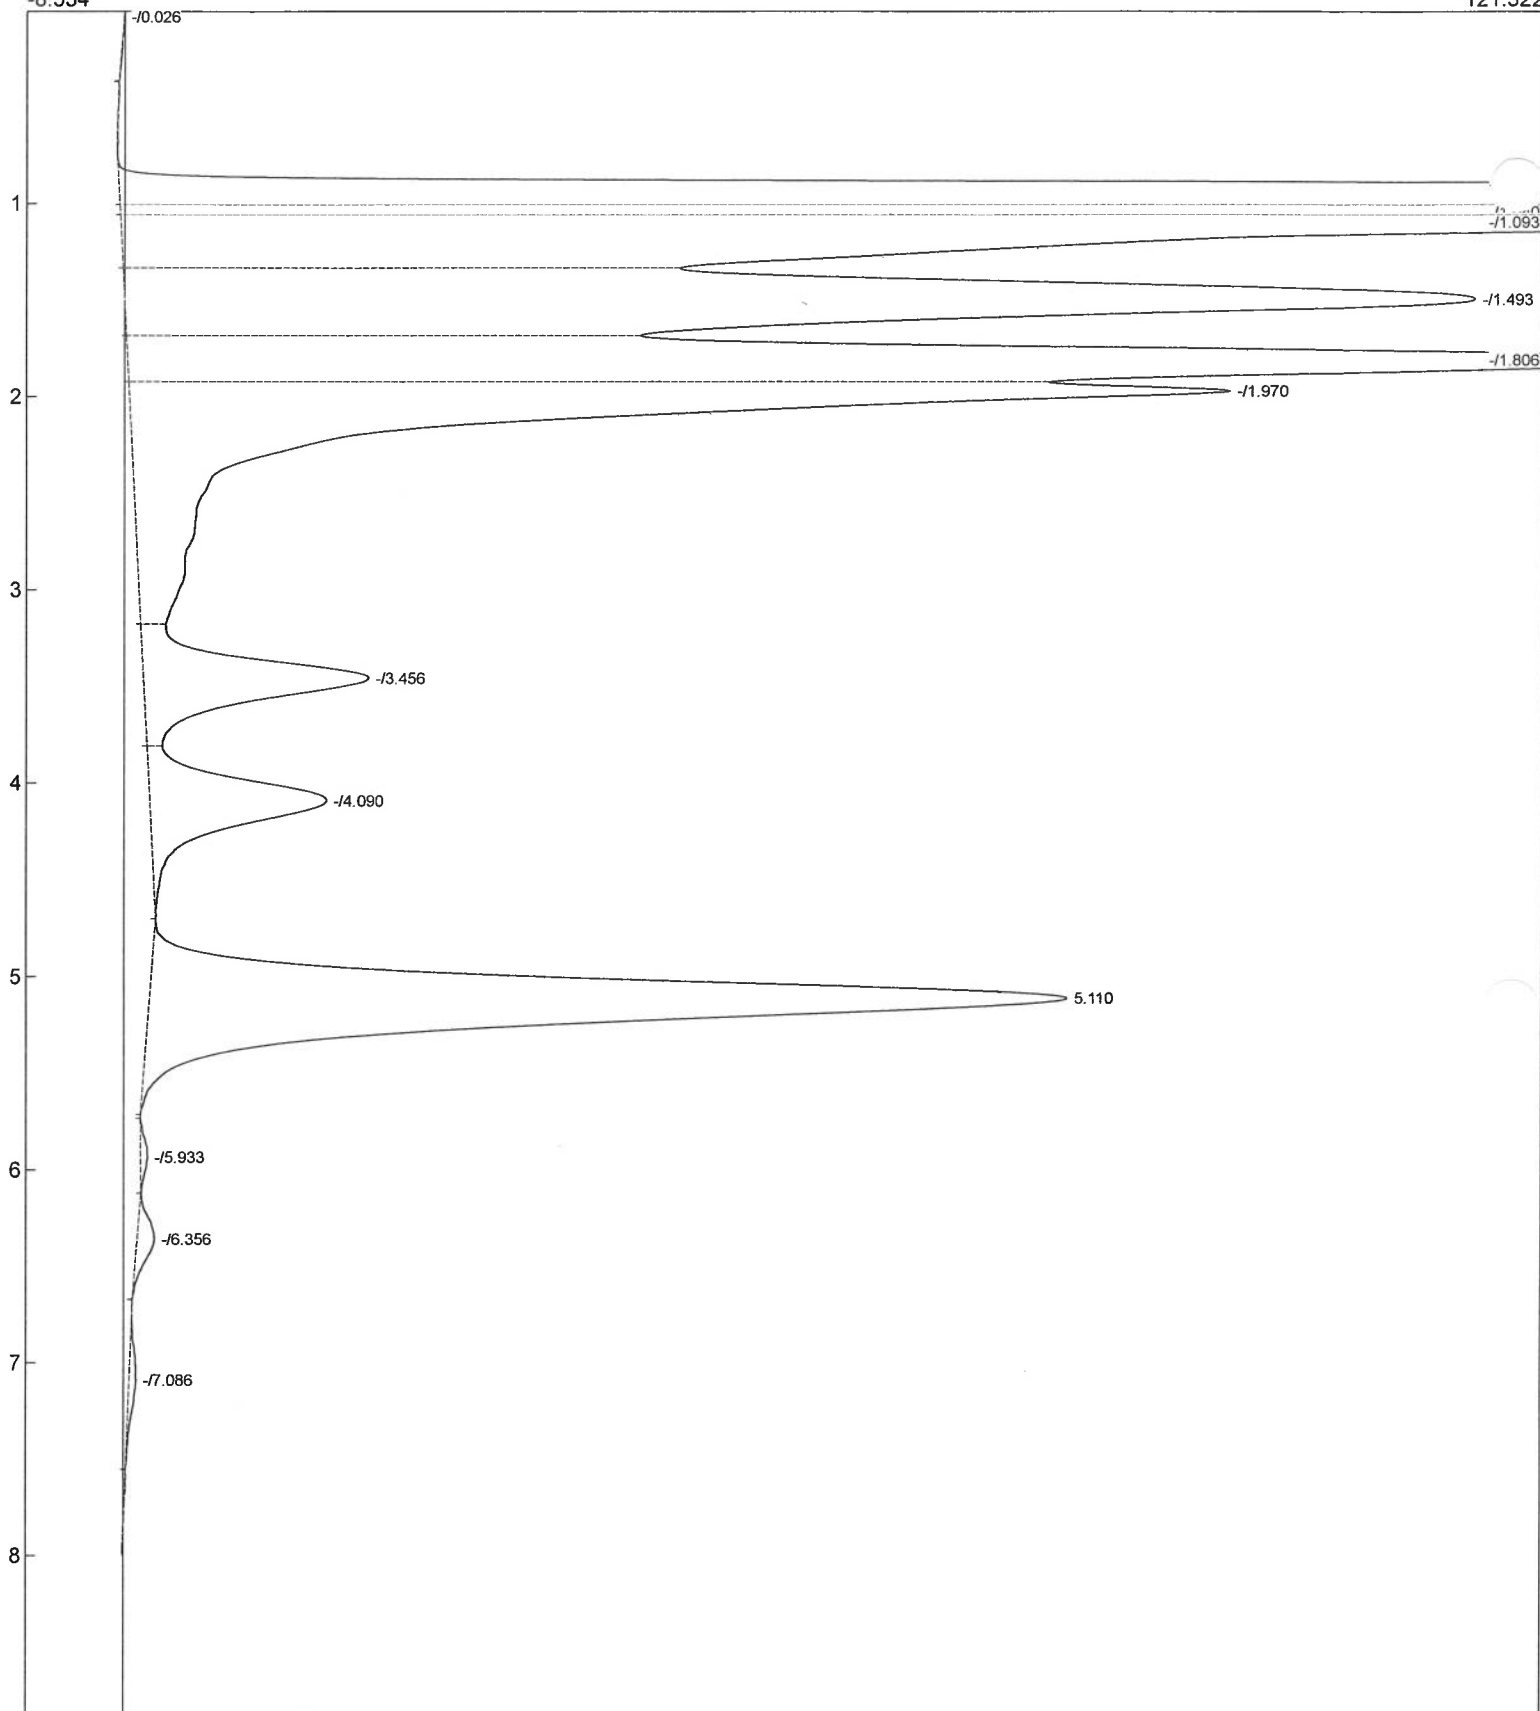

| Component | Retention | Area      | External | Units |
|-----------|-----------|-----------|----------|-------|
|           | 5.110     | 1213.8652 | 0.0000   |       |
|           |           | 1213.8652 | 0.0000   |       |

9/8/18  
168

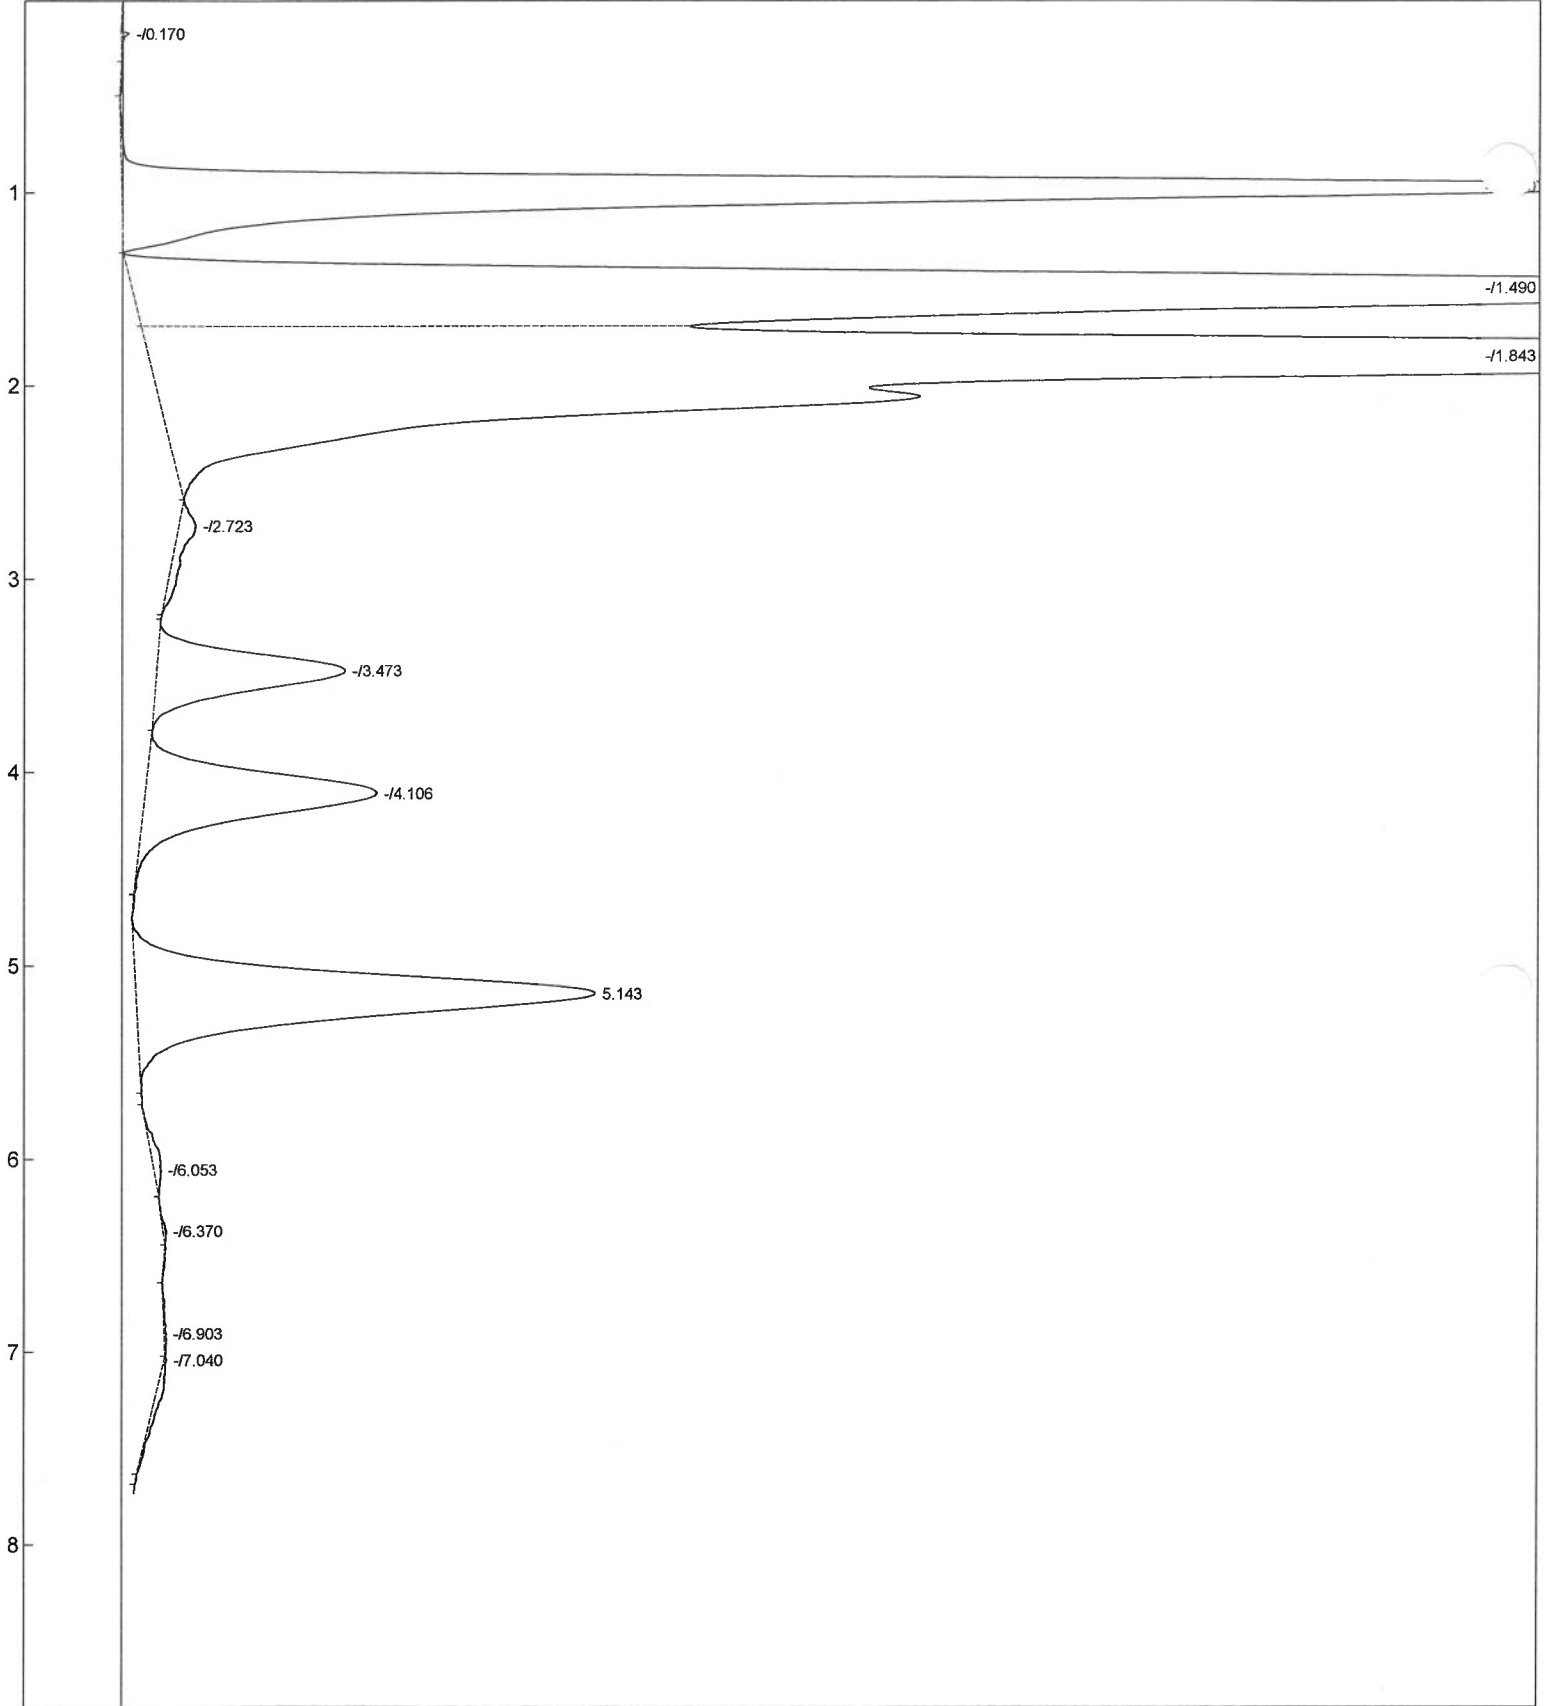

| Component | Retention | Area     | External | Units |
|-----------|-----------|----------|----------|-------|
|           | 5.143     | 302.4406 | 0.0000   |       |
|           |           | 302.4406 | 0.0000   |       |

7/18/18  
FSU169

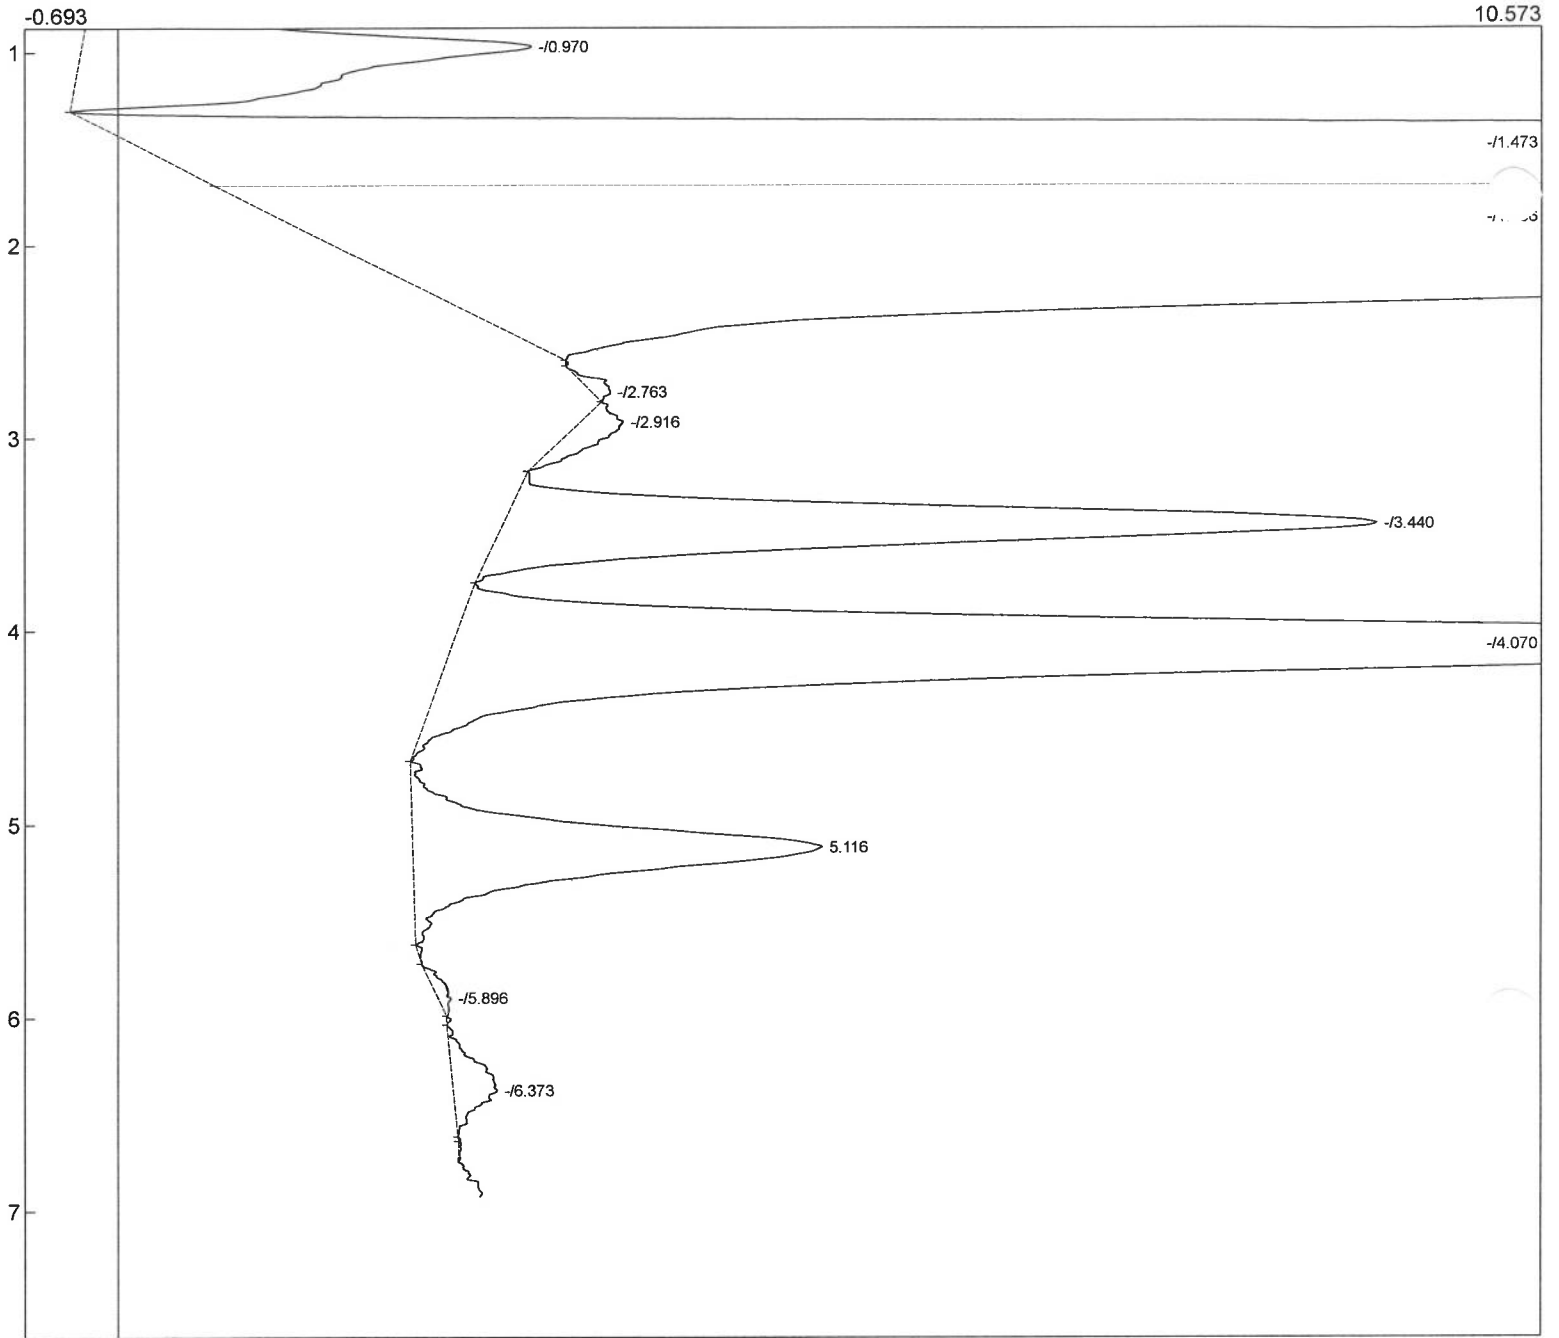

| Component | Retention | Area      | External | Units |
|-----------|-----------|-----------|----------|-------|
| -         | 0.970     | 79.4154   | 0.0000   |       |
| -         | 1.473     | 1052.3591 | 0.0000   |       |
| -         | 1.856     | 1772.8083 | 0.0000   |       |
| -         | 2.763     | 1.0305    | 0.0000   |       |
| -         | 2.916     | 4.5285    | 0.0000   |       |
| -         | 3.440     | 81.6050   | 0.0000   |       |
| -         | 4.070     | 222.2967  | 0.0000   |       |
| -         | 0.000     | 0.0000    | 0.0000   |       |
| -         | 5.116     | 51.6115   | 0.0000   |       |
| -         | 5.896     | 1.0548    | 0.0000   |       |
| -         | 6.373     | 5.2859    | 0.0000   |       |
|           |           | 3271.9957 | 0.0000   |       |

Fish 170  
 7/18/2018  
 1337 15'  
 Range 0.0005

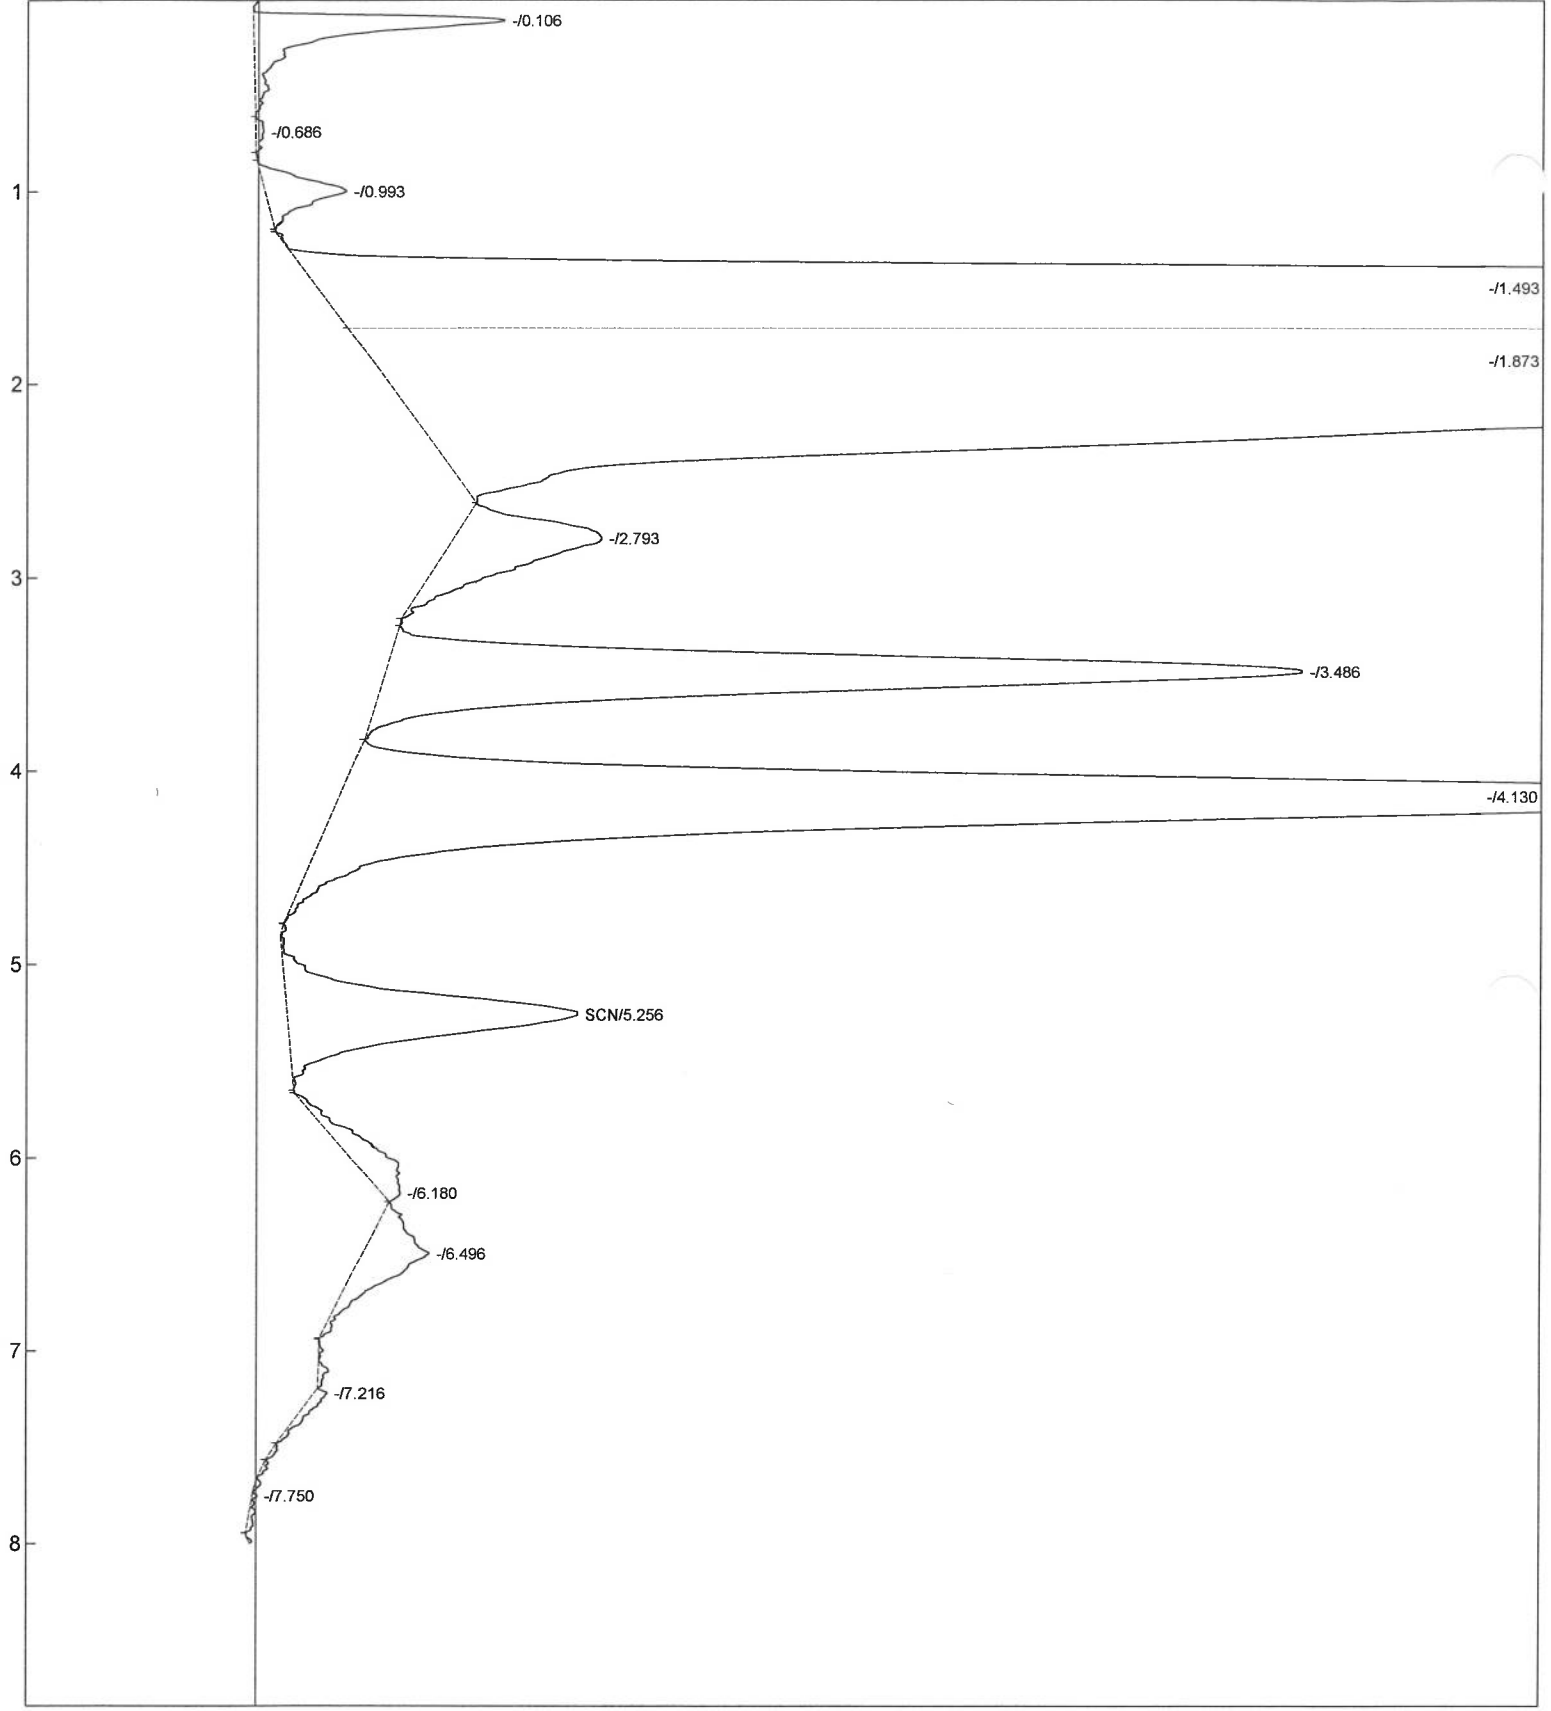

| Component | Retention | Area    | External | Units |
|-----------|-----------|---------|----------|-------|
| SCN       | 5.256     | 47.7914 | 0.0000   |       |
|           |           | 47.7914 | 0.0000   |       |

110  
 Run 2  
 127015:  
 7/23/18

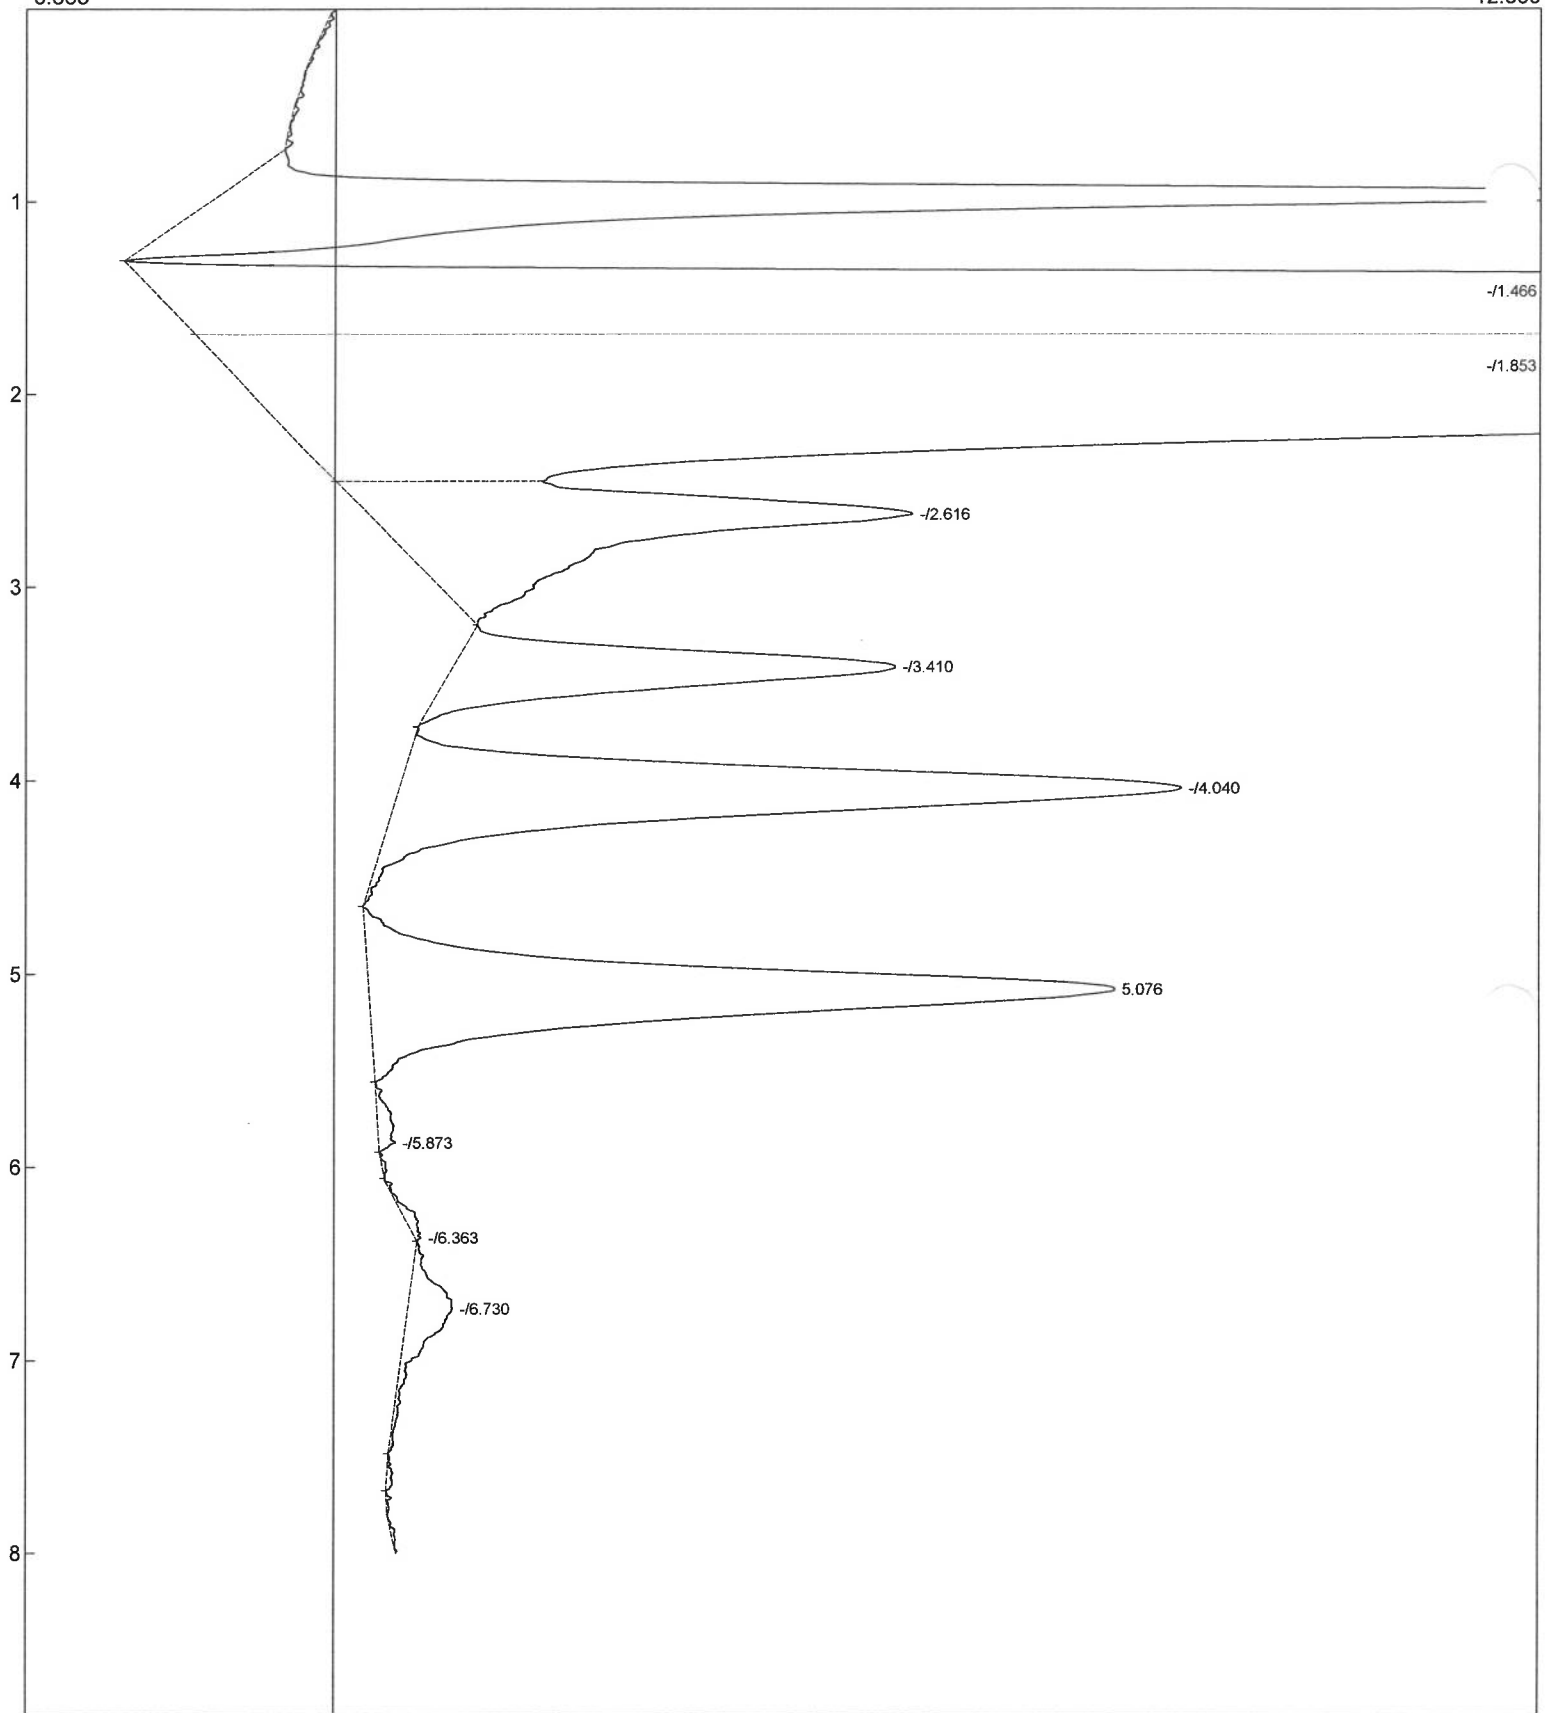

| Component | Retention | Area     | External | Units |
|-----------|-----------|----------|----------|-------|
|           | 5.076     | 134.1116 | 0.0000   |       |
|           | 134.1116  | 0.0000   |          |       |

F171  
7/18/18



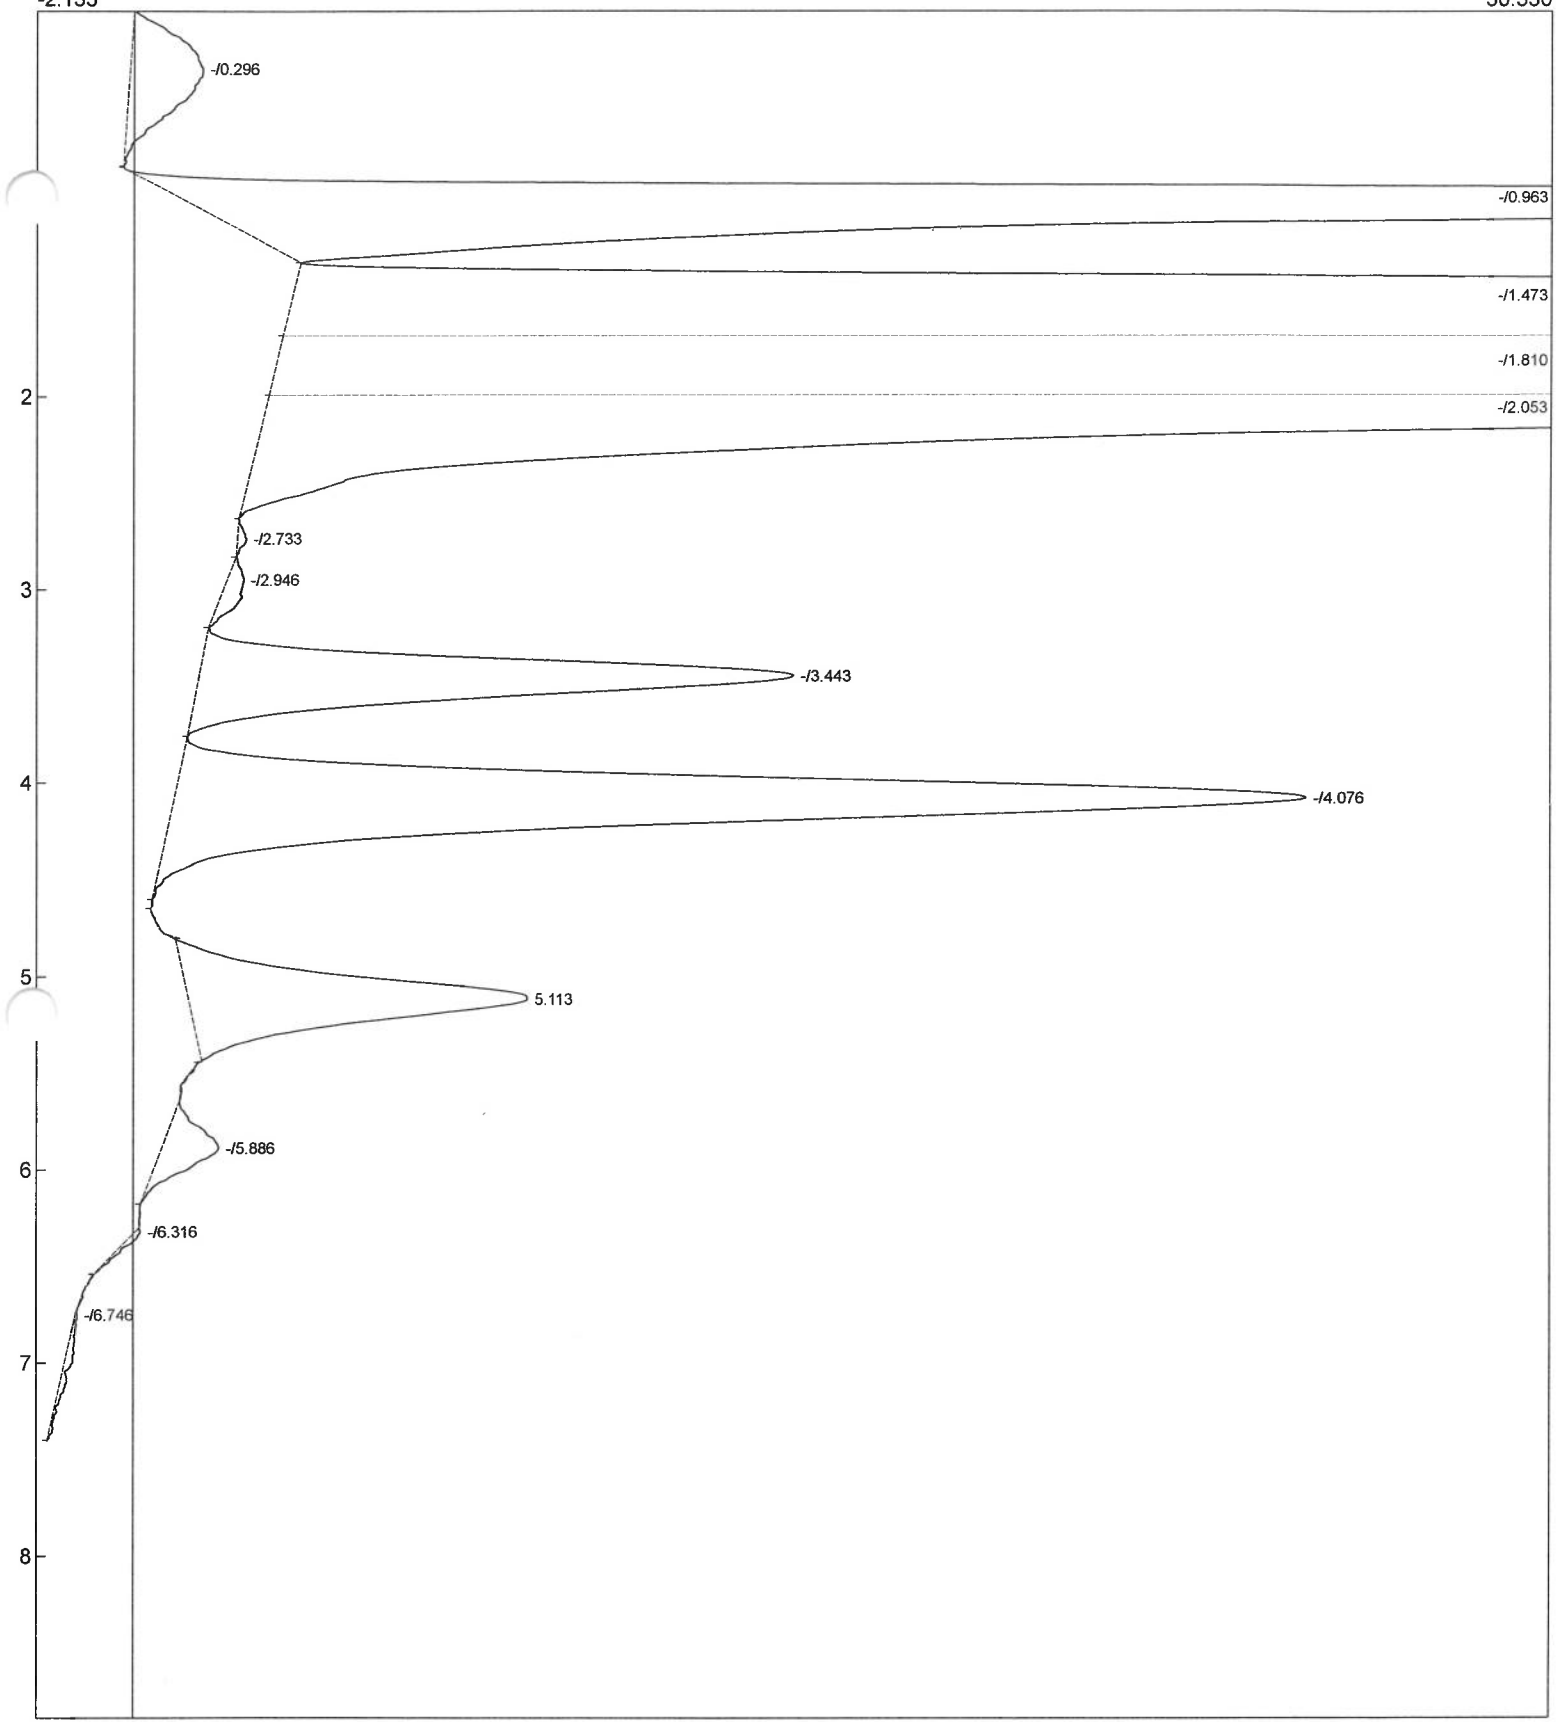

| Component | Retention | Area     | External | Units |
|-----------|-----------|----------|----------|-------|
|           | 5.113     | 115.8720 | 0.0000   |       |
|           | 5.113     | 115.8720 | 0.0000   |       |

*Handwritten notes:*  
 122  
 7/18/15

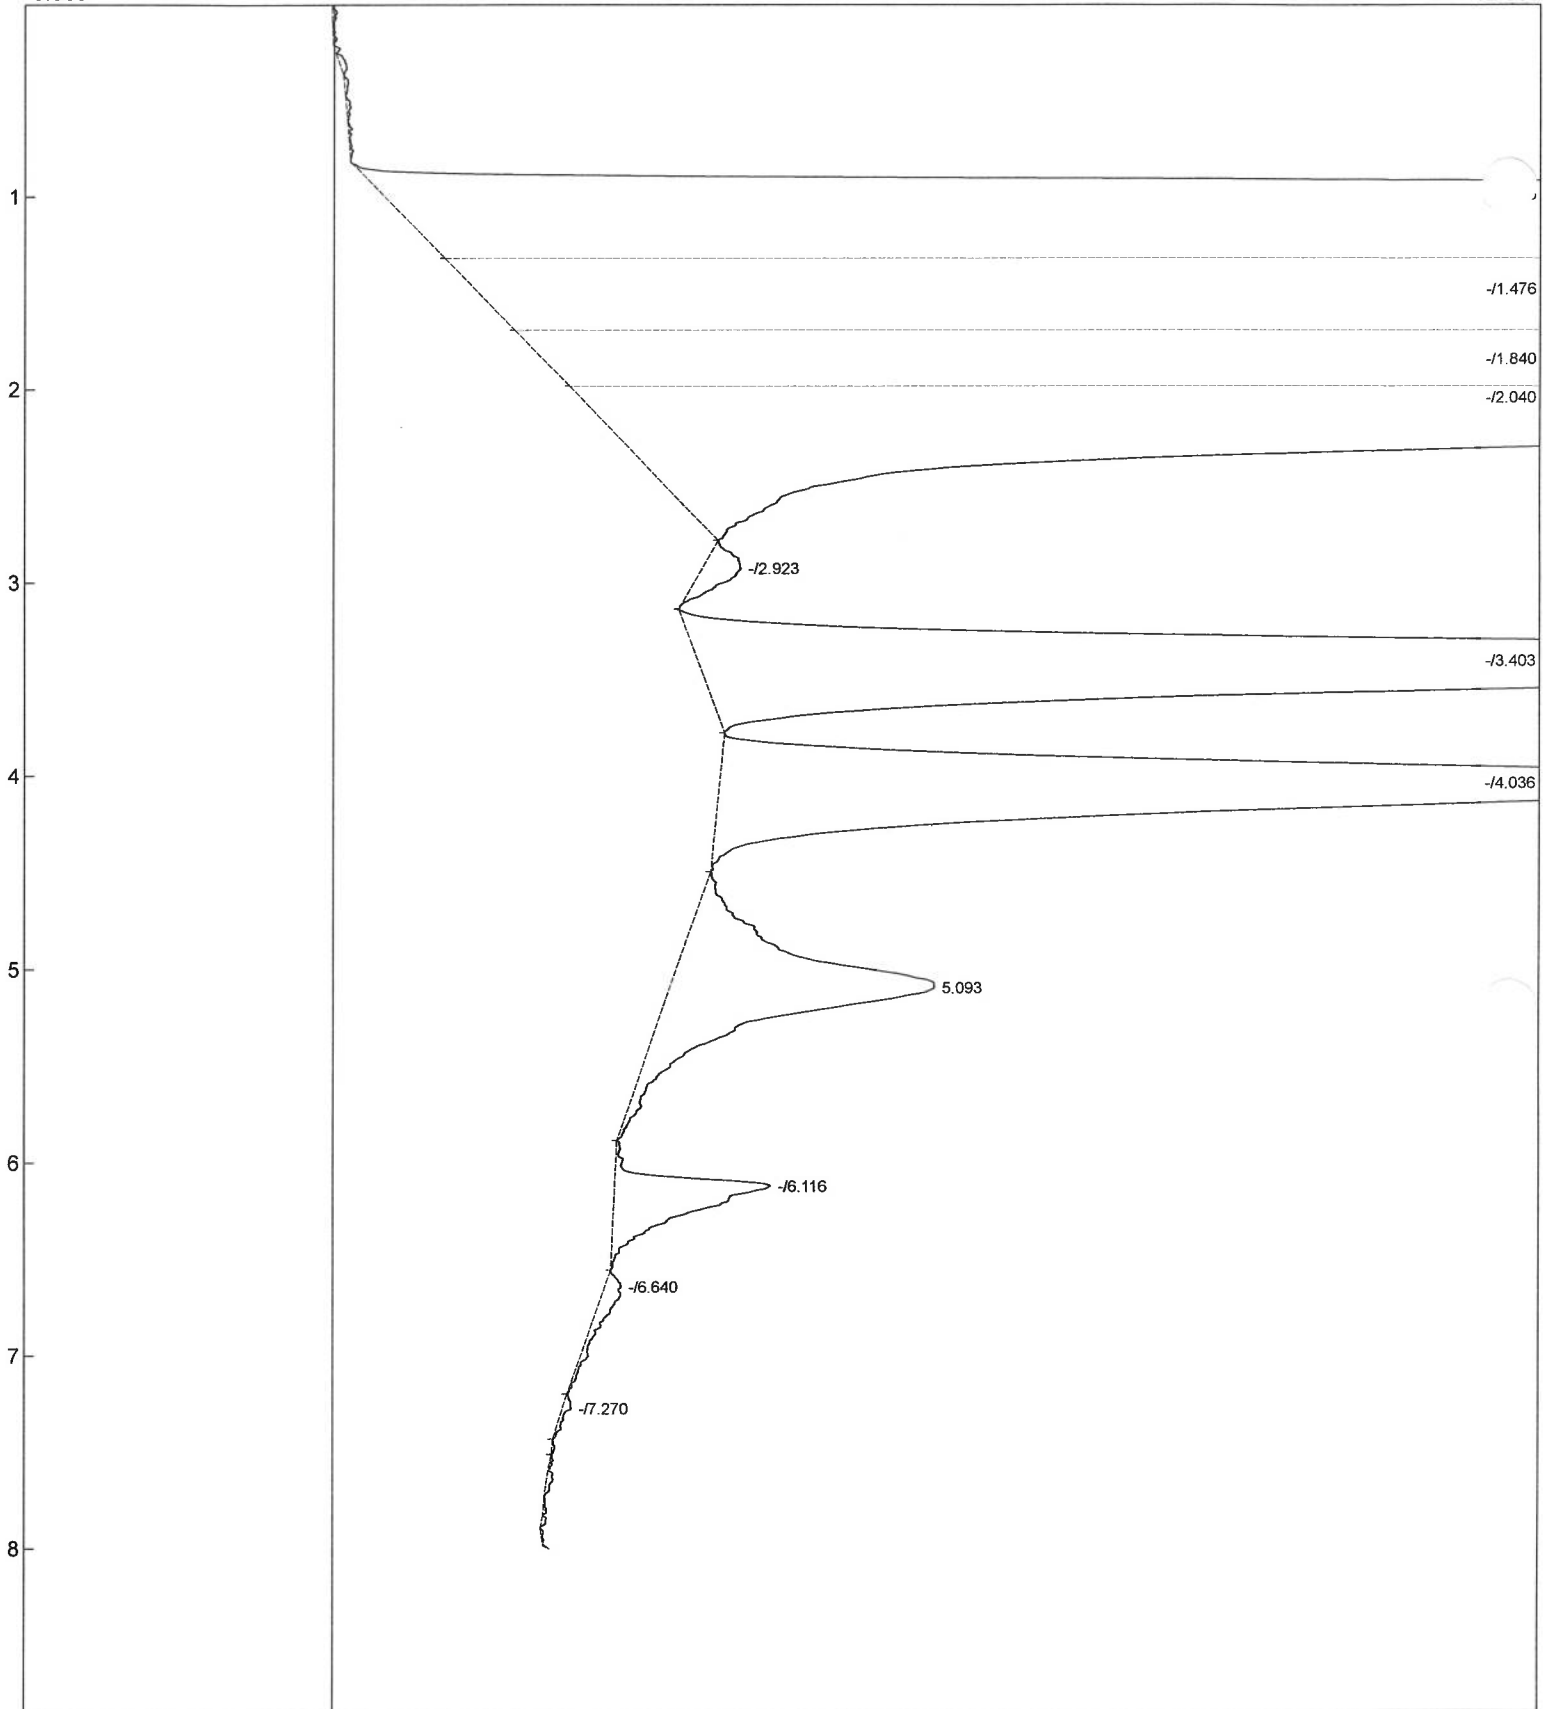

| Component | Retention | Area    | External | Units |
|-----------|-----------|---------|----------|-------|
|           | 5.093     | 65.1629 | 0.0000   |       |
|           |           | 65.1629 | 0.0000   |       |

173

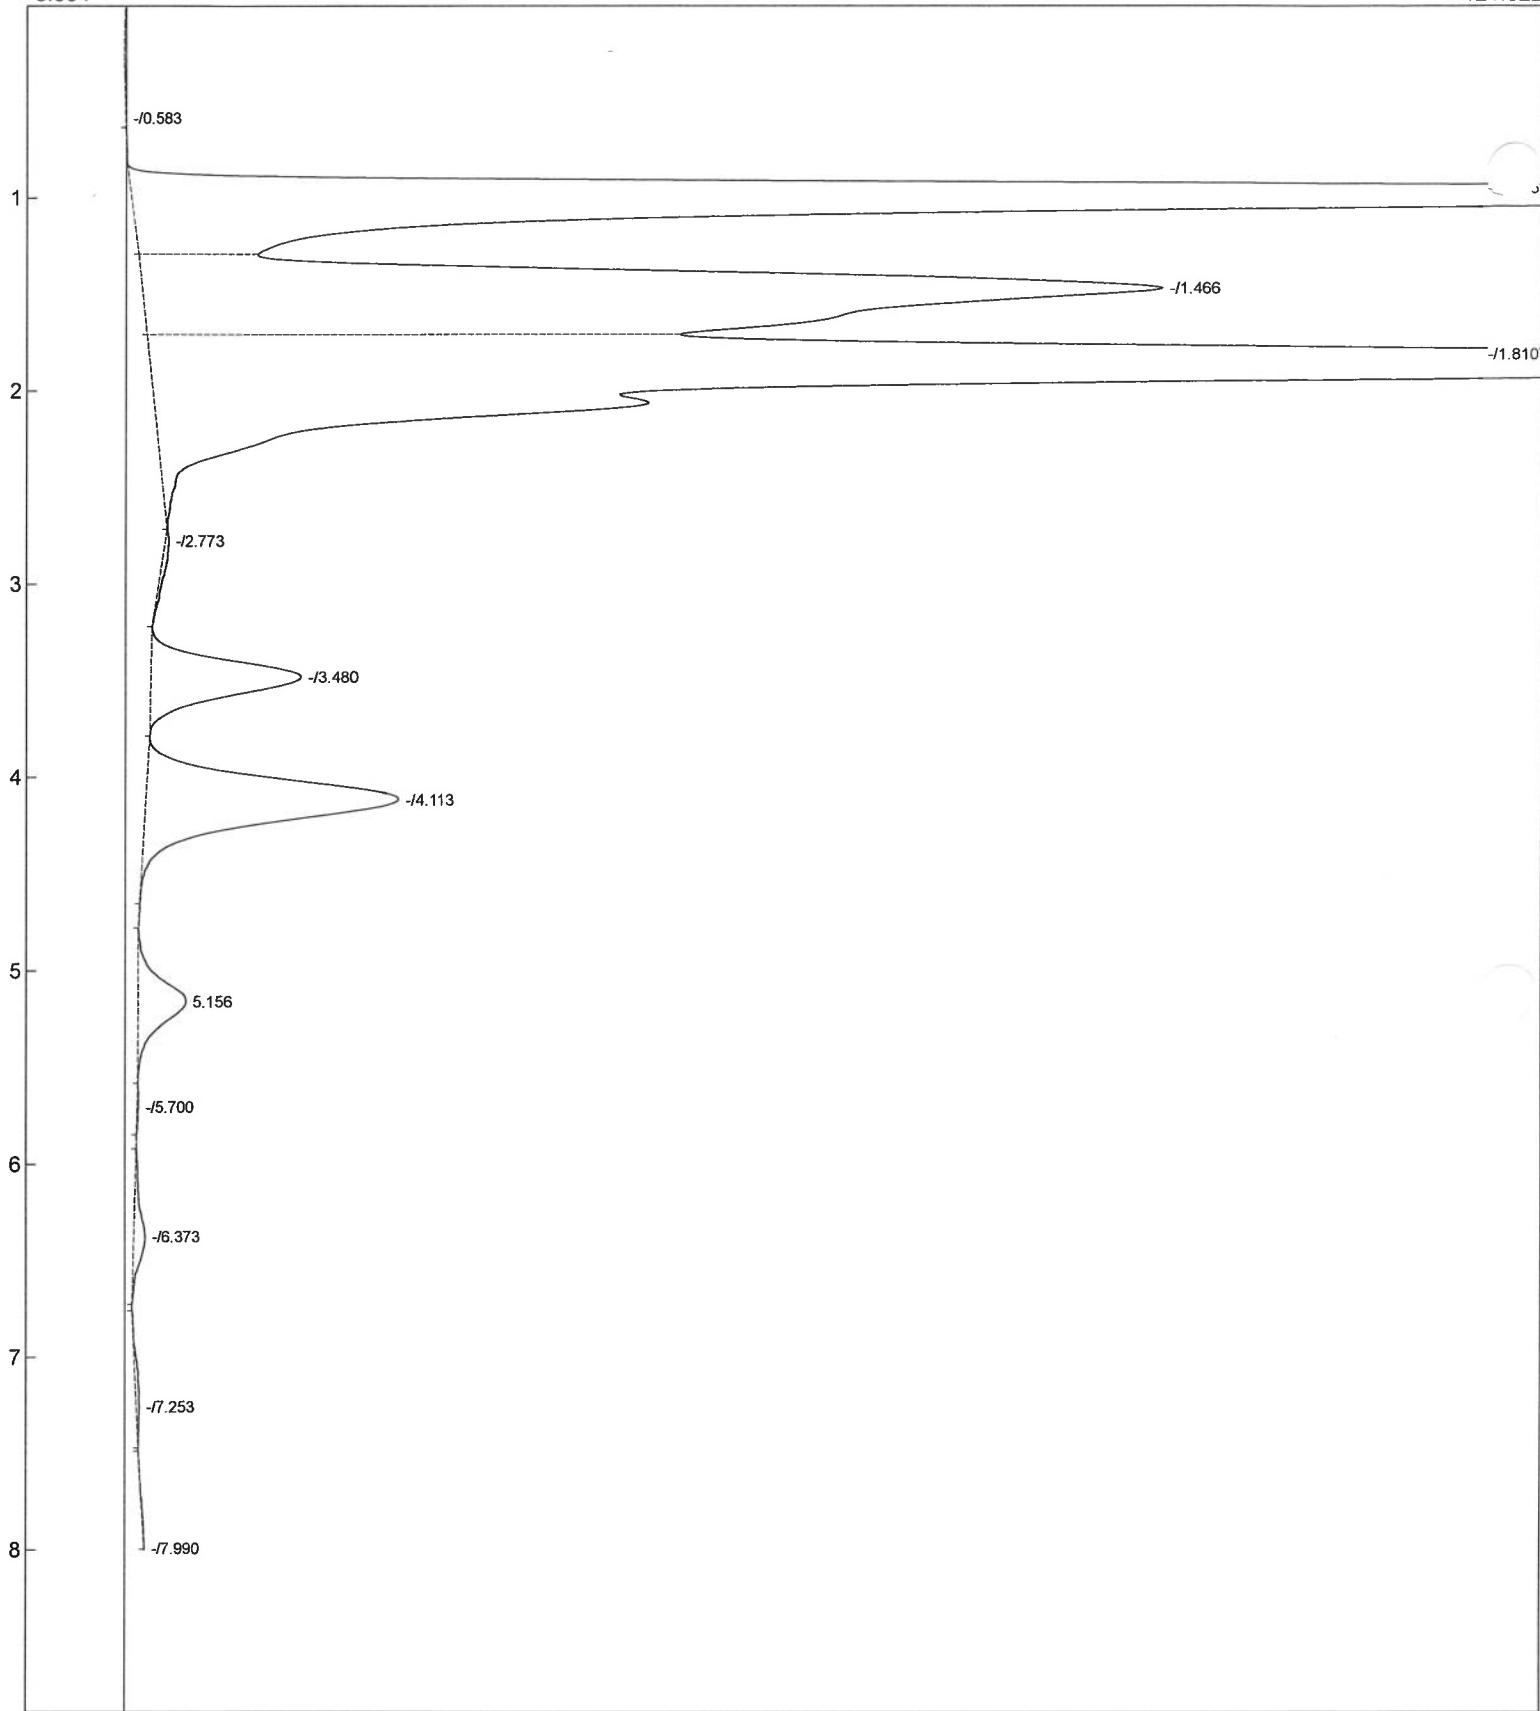

| Component | Retention | Area    | External | Units |
|-----------|-----------|---------|----------|-------|
|           | 5.156     | 66.8688 | 0.0000   |       |
|           |           | 66.8688 | 0.0000   |       |

6/18/18  
F01174

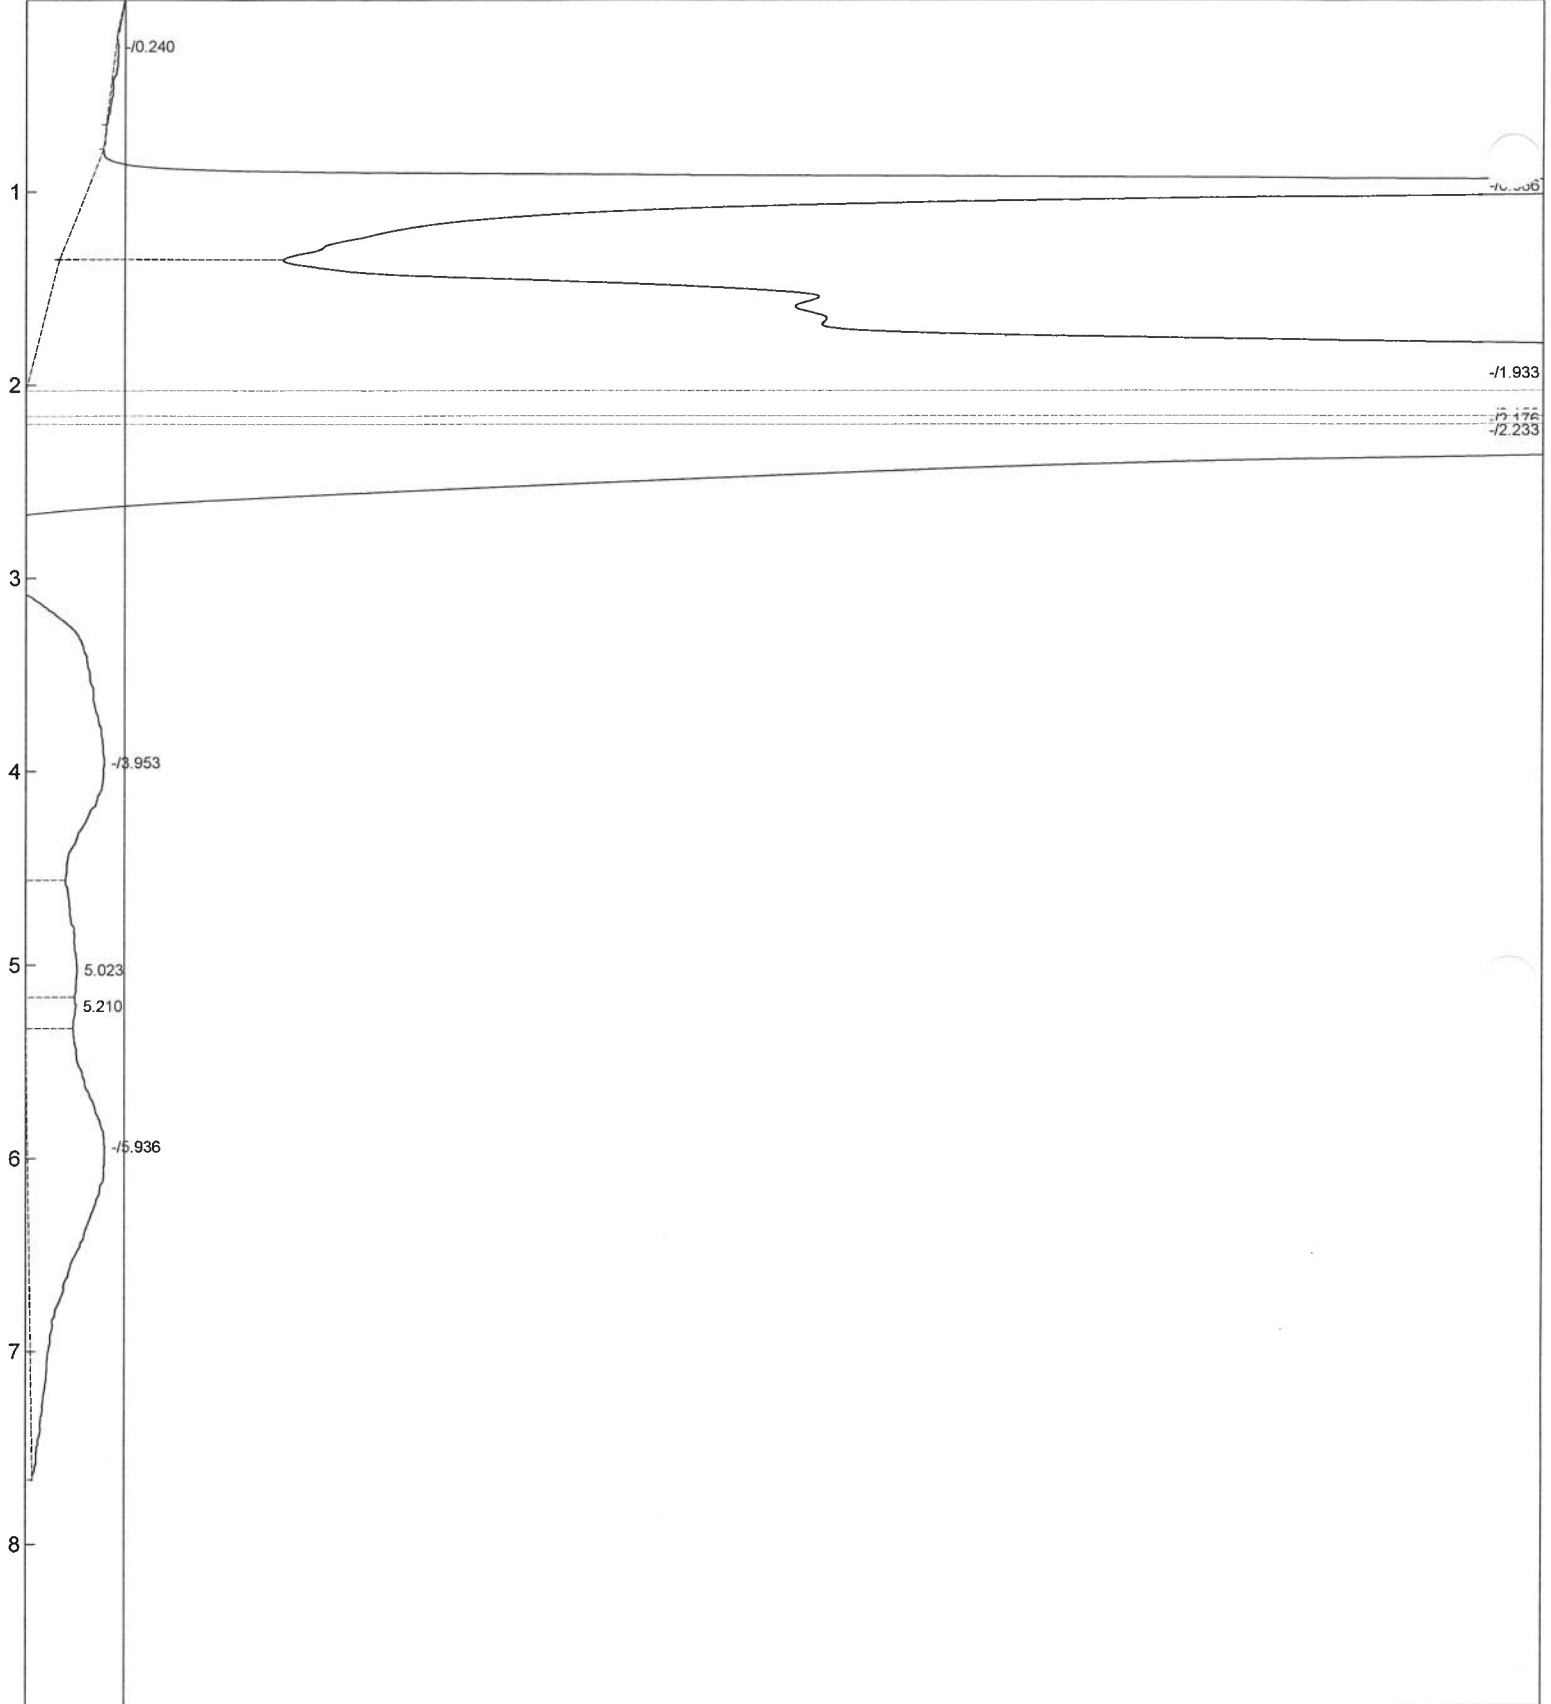

| Component | Retention | Area     | External | Units |
|-----------|-----------|----------|----------|-------|
|           | 5.023     | 139.2164 | 0.0000   |       |
|           | 5.210     | 35.2697  | 0.0000   |       |
|           |           | 174.4861 | 0.0000   |       |

7/18/18  
1+6

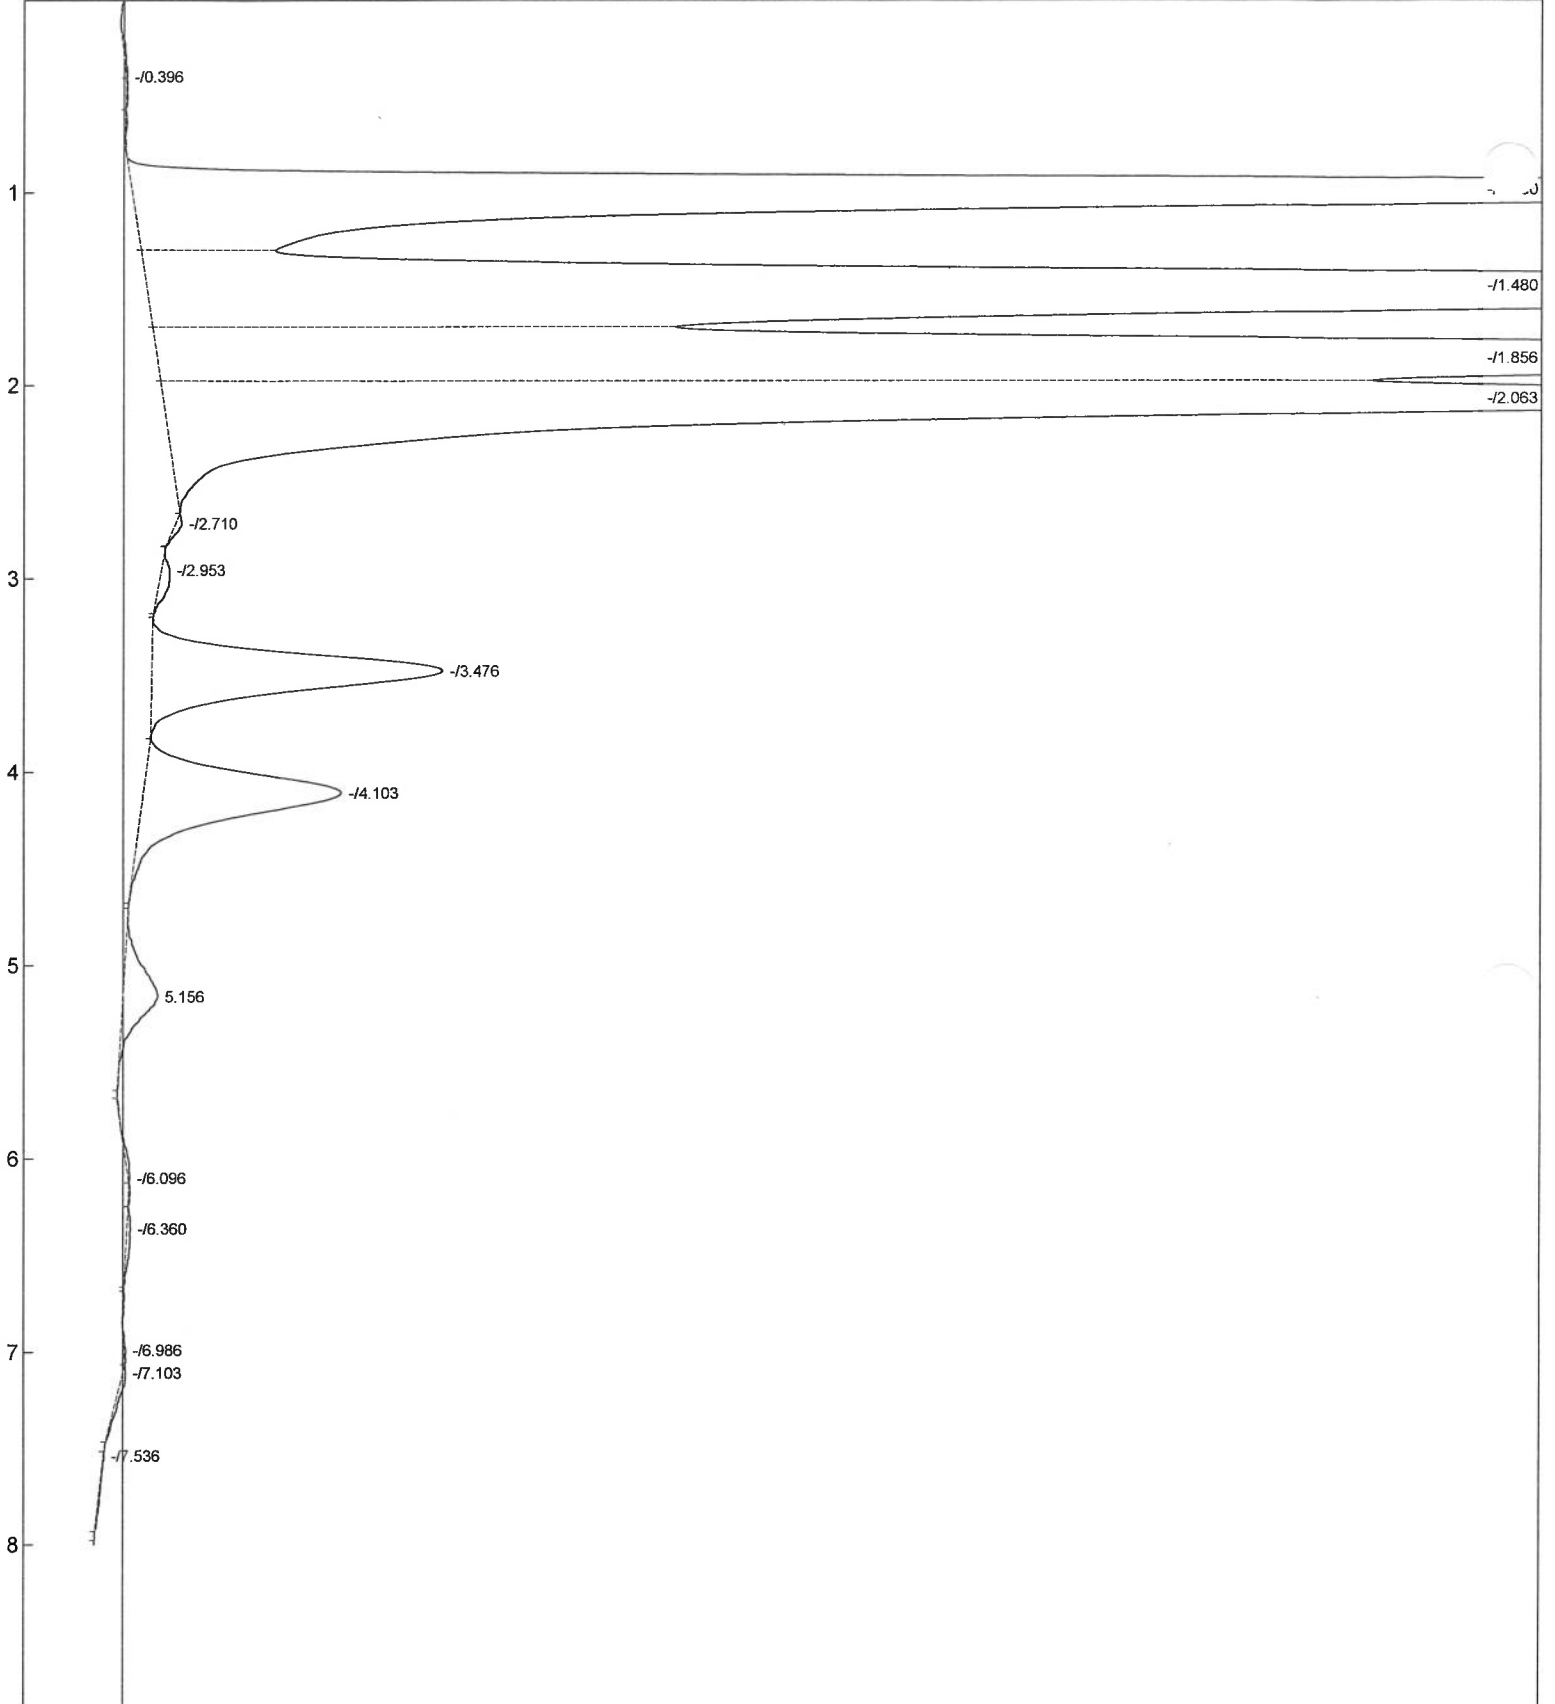

| Component | Retention | Area    | External Units |
|-----------|-----------|---------|----------------|
|           | 5.156     | 28.2044 | 0.0000         |
|           | 28.2044   | 0.0000  |                |

1.5 125  
 7/18/18  
 1250 psi

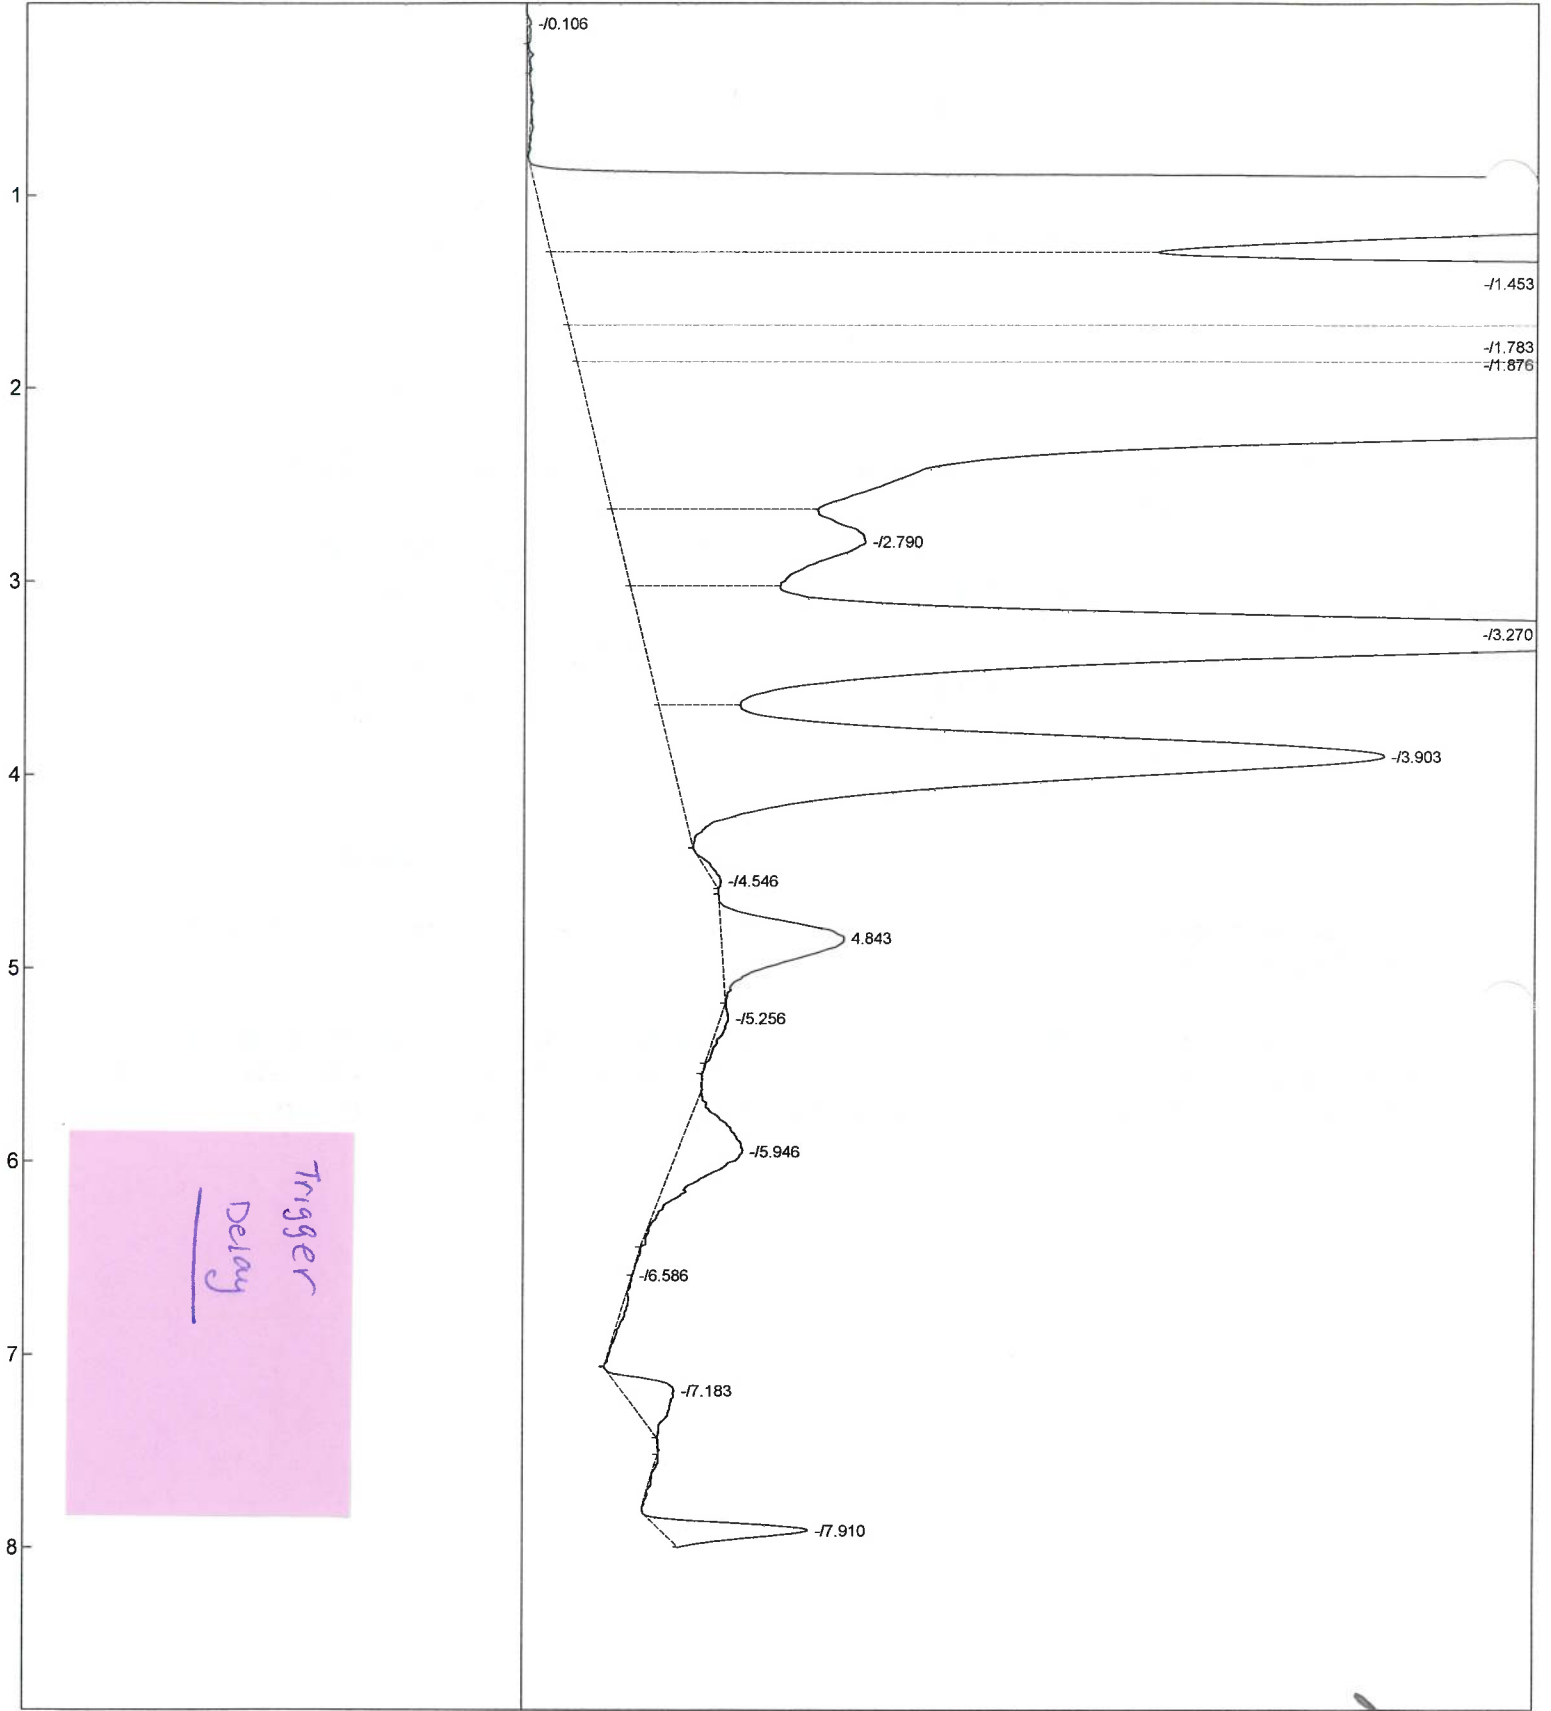

| Component | Retention | Area    | External | Units |
|-----------|-----------|---------|----------|-------|
|           | 4.843     | 34.9802 | 0.0000   |       |
|           | 34.9802   | 0.0000  |          |       |

8/17/18  
 177

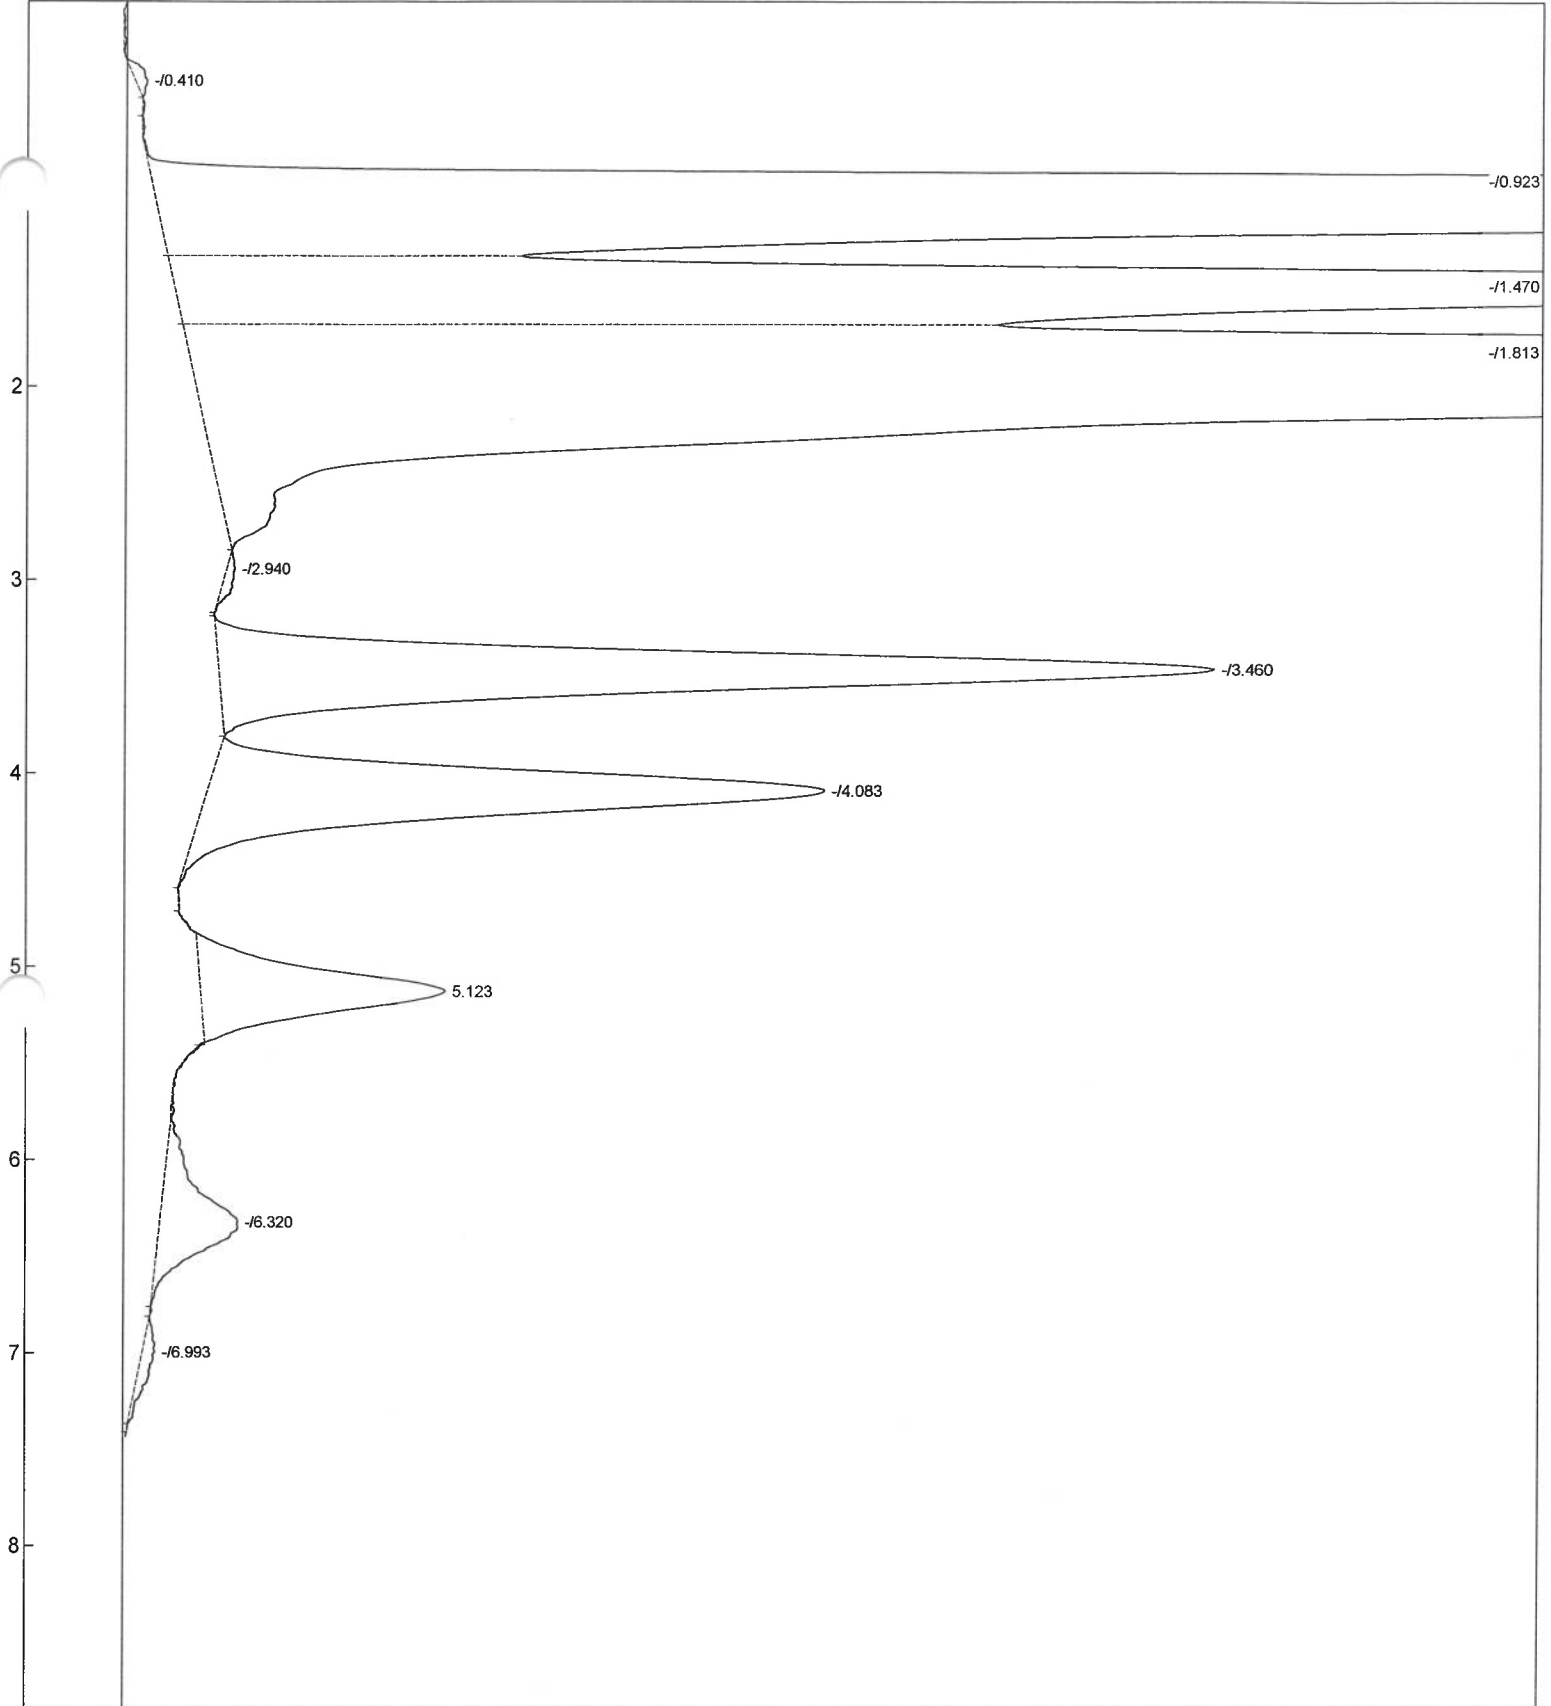

| Component | Retention | Area    | External Units |
|-----------|-----------|---------|----------------|
|           | 5.123     | 78.8017 | 0.0000         |
|           | 5.123     | 78.8017 | 0.0000         |

8/18/18  
FR

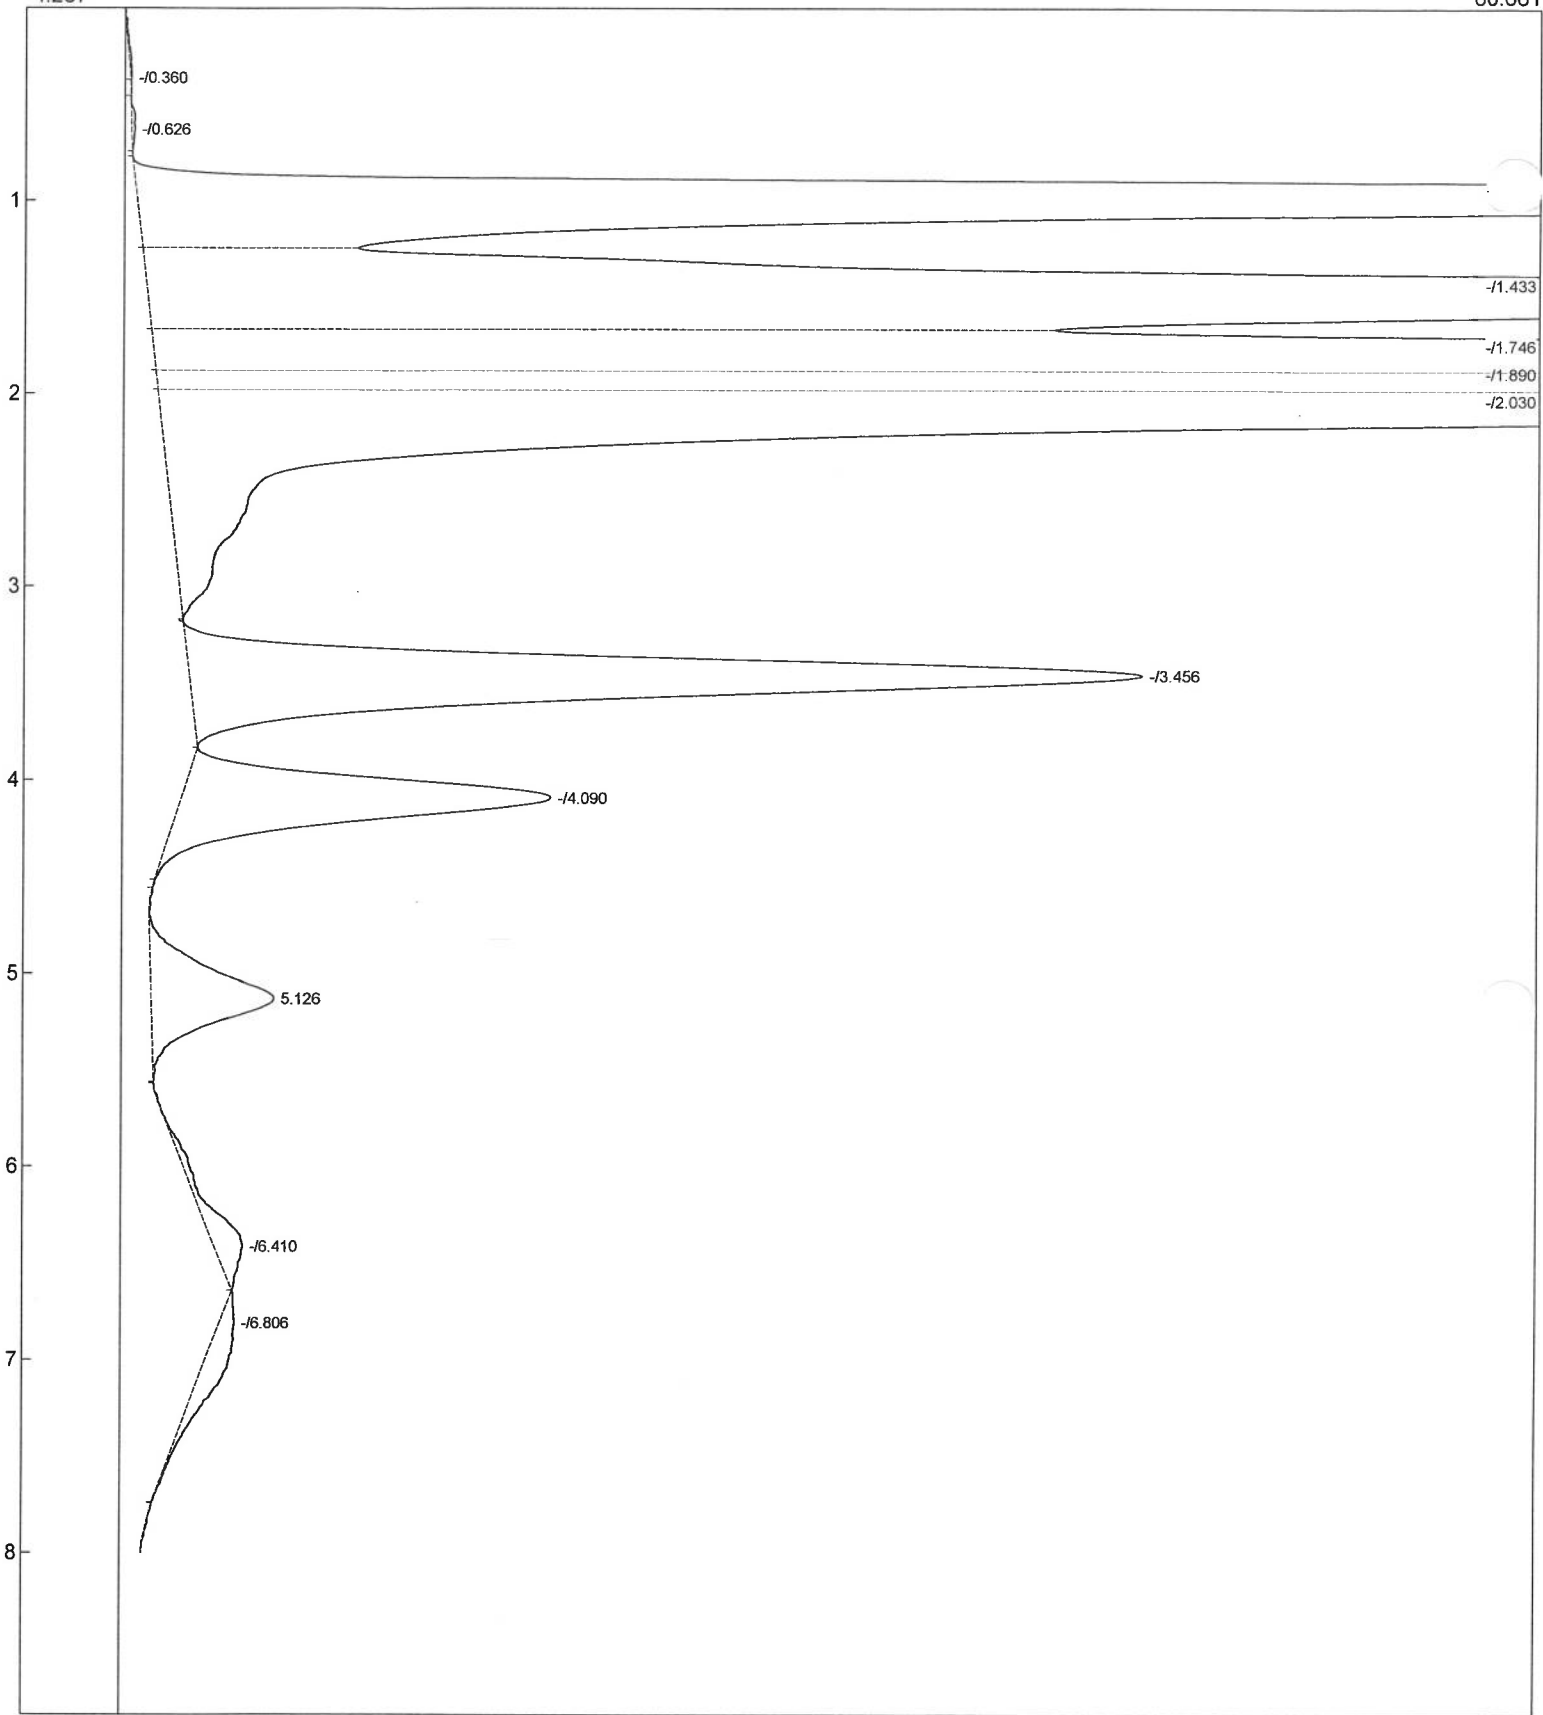

| Component | Retention | Area     | External | Units |
|-----------|-----------|----------|----------|-------|
|           | 5.126     | 100.0215 | 0.0000   |       |
|           |           | 100.0215 | 0.0000   |       |

7/18/18  
F-6174



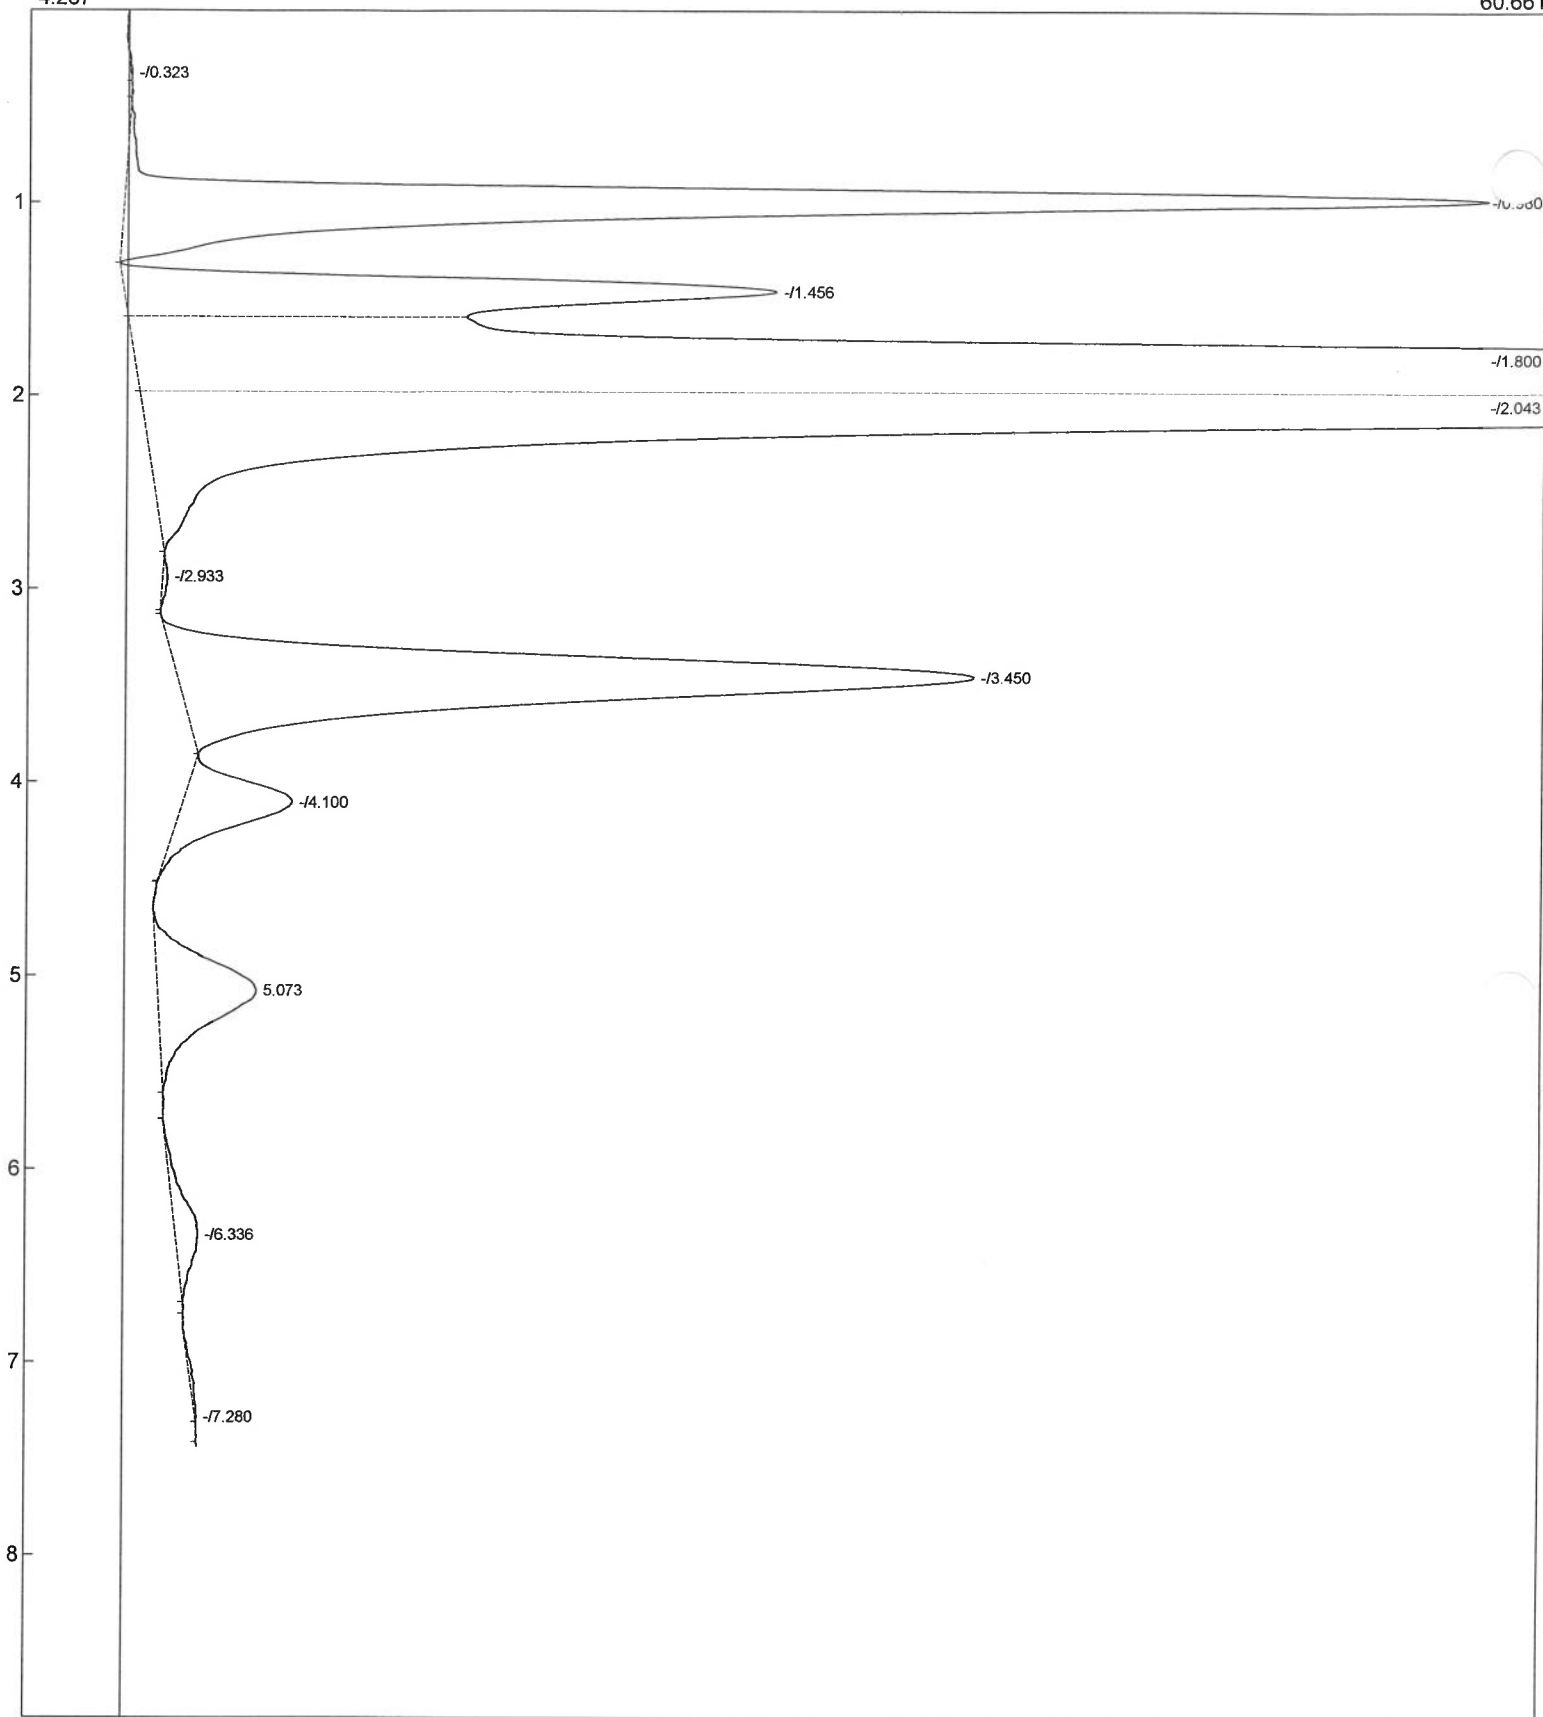

| Component | Retention | Area    | External Units |
|-----------|-----------|---------|----------------|
|           | 5.073     | 96.8868 | 0.0000         |
|           |           | 96.8868 | 0.0000         |

150  
7/18/18

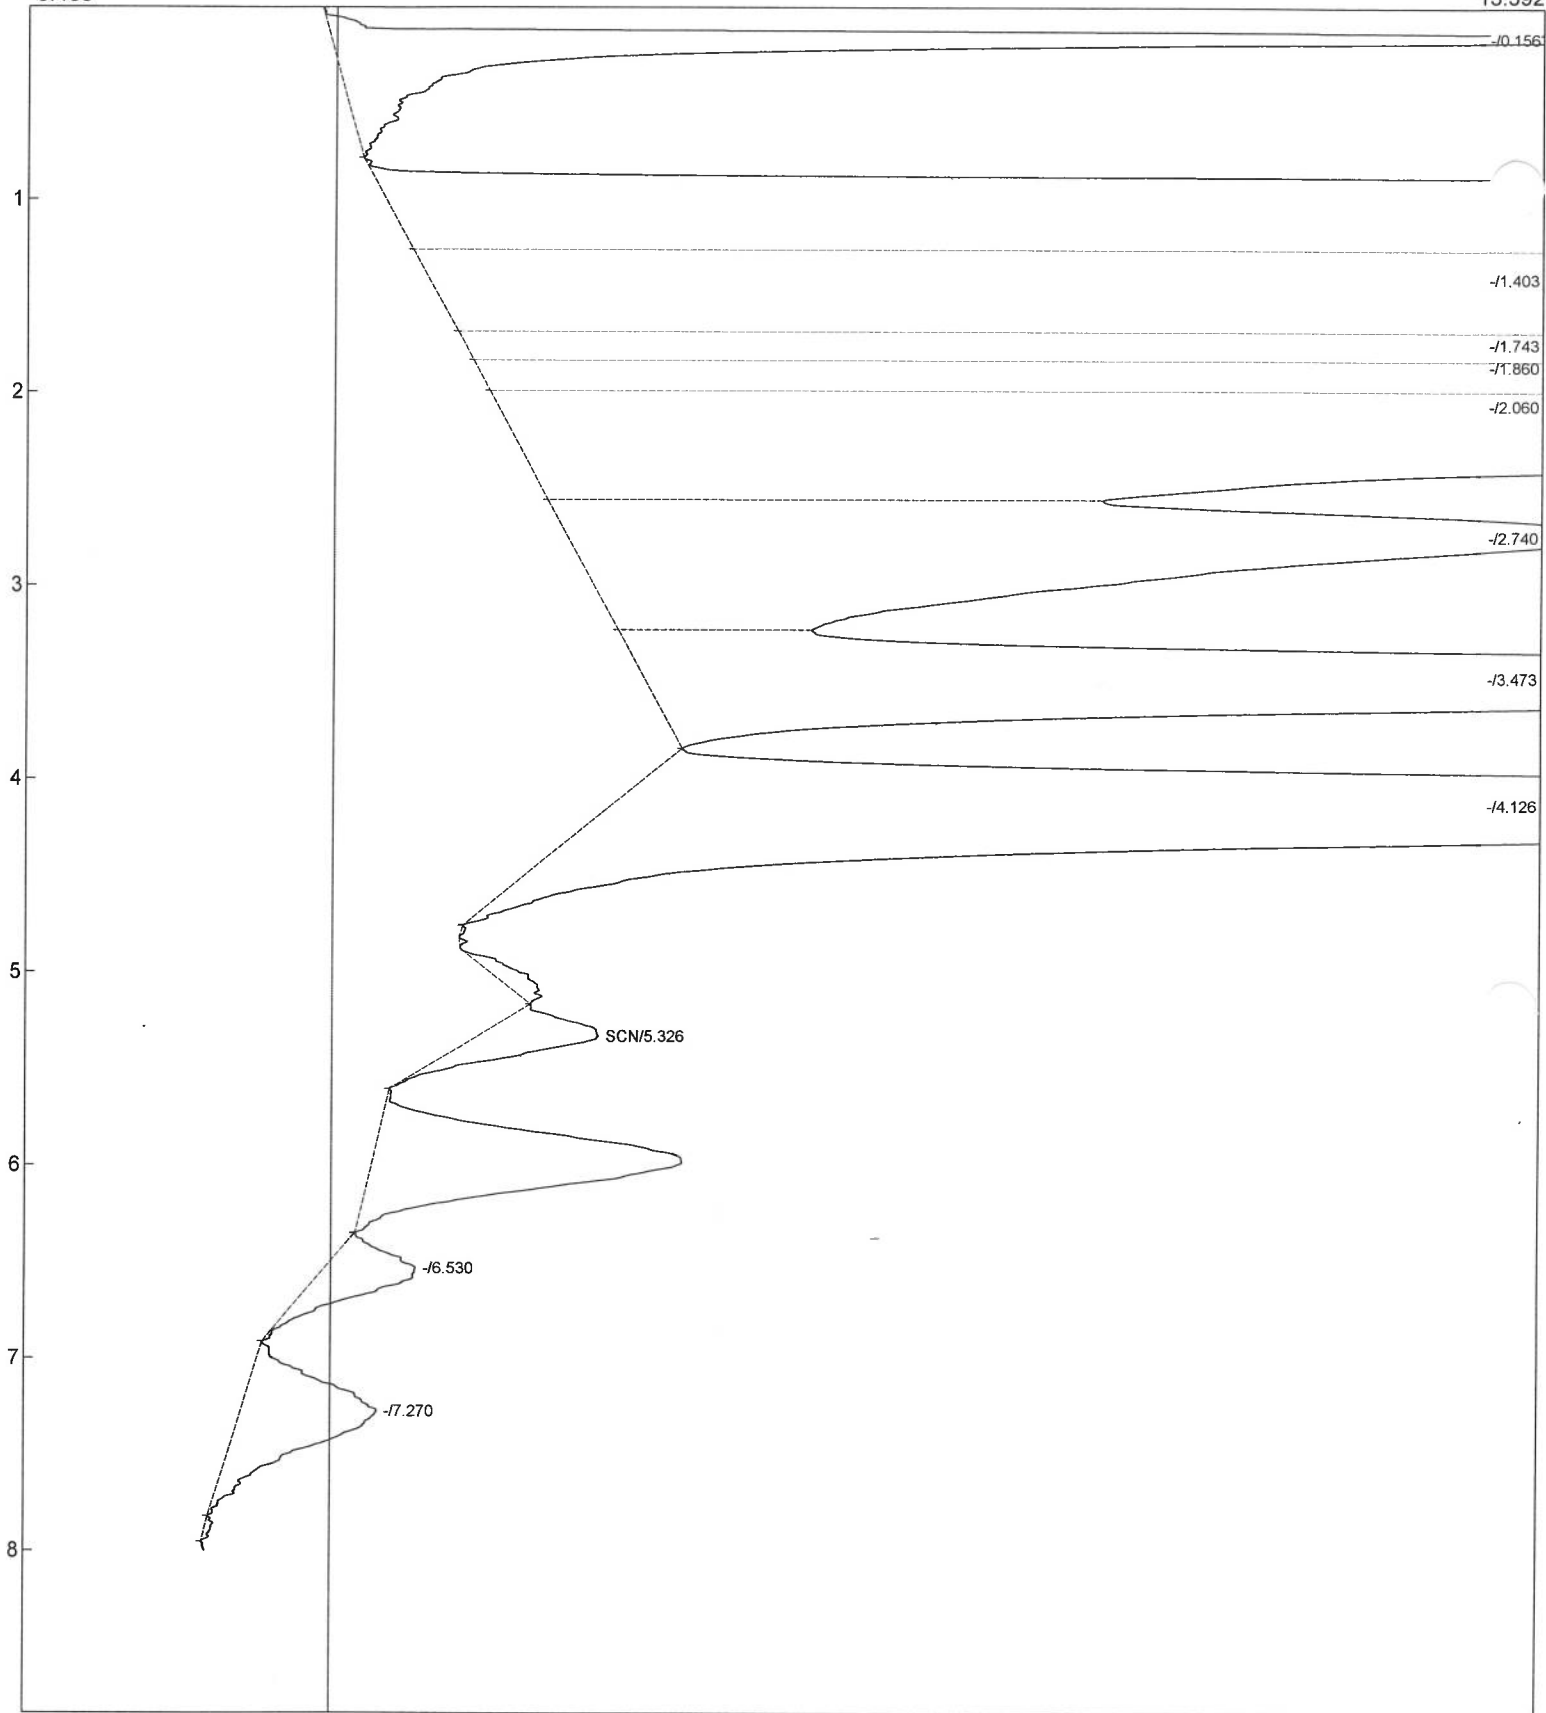

| Component | Retention | Area    | External | Units |
|-----------|-----------|---------|----------|-------|
| SCN       | 5.326     | 82.9320 | 0.0000   |       |
|           |           | 82.9320 | 0.0000   |       |

Fresh 181  
 72 hours  
 1290 PSI  
 7/23/18

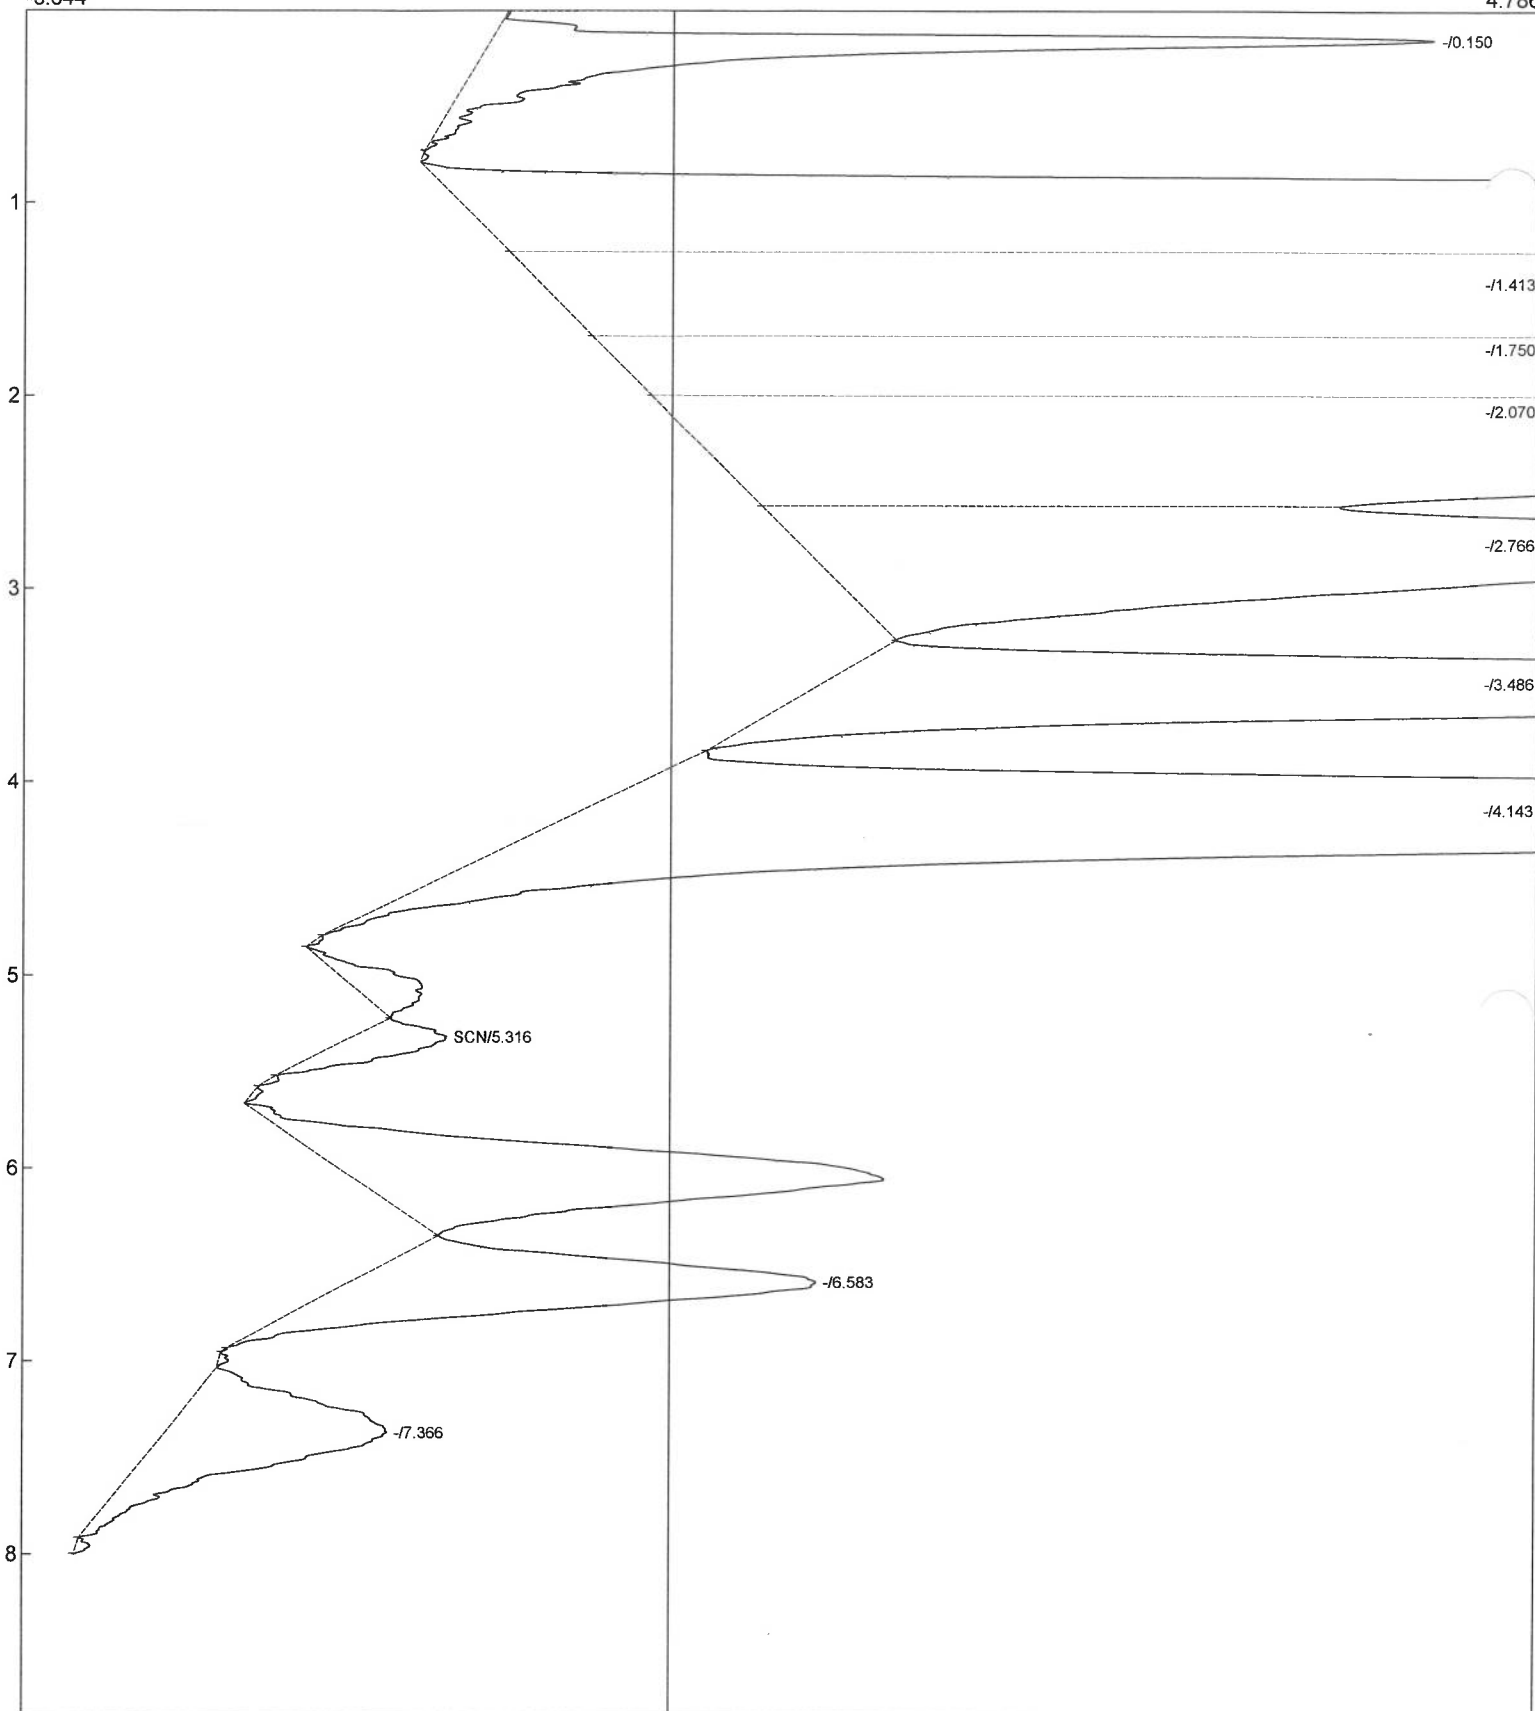

| Component | Retention | Area    | External | Units |
|-----------|-----------|---------|----------|-------|
| SCN       | 5.316     | 60.9727 | 0.0000   |       |
|           |           | 60.9727 | 0.0000   |       |

*fish 182*  
*72 hours*  
*1320PS*  
*7/23/18*

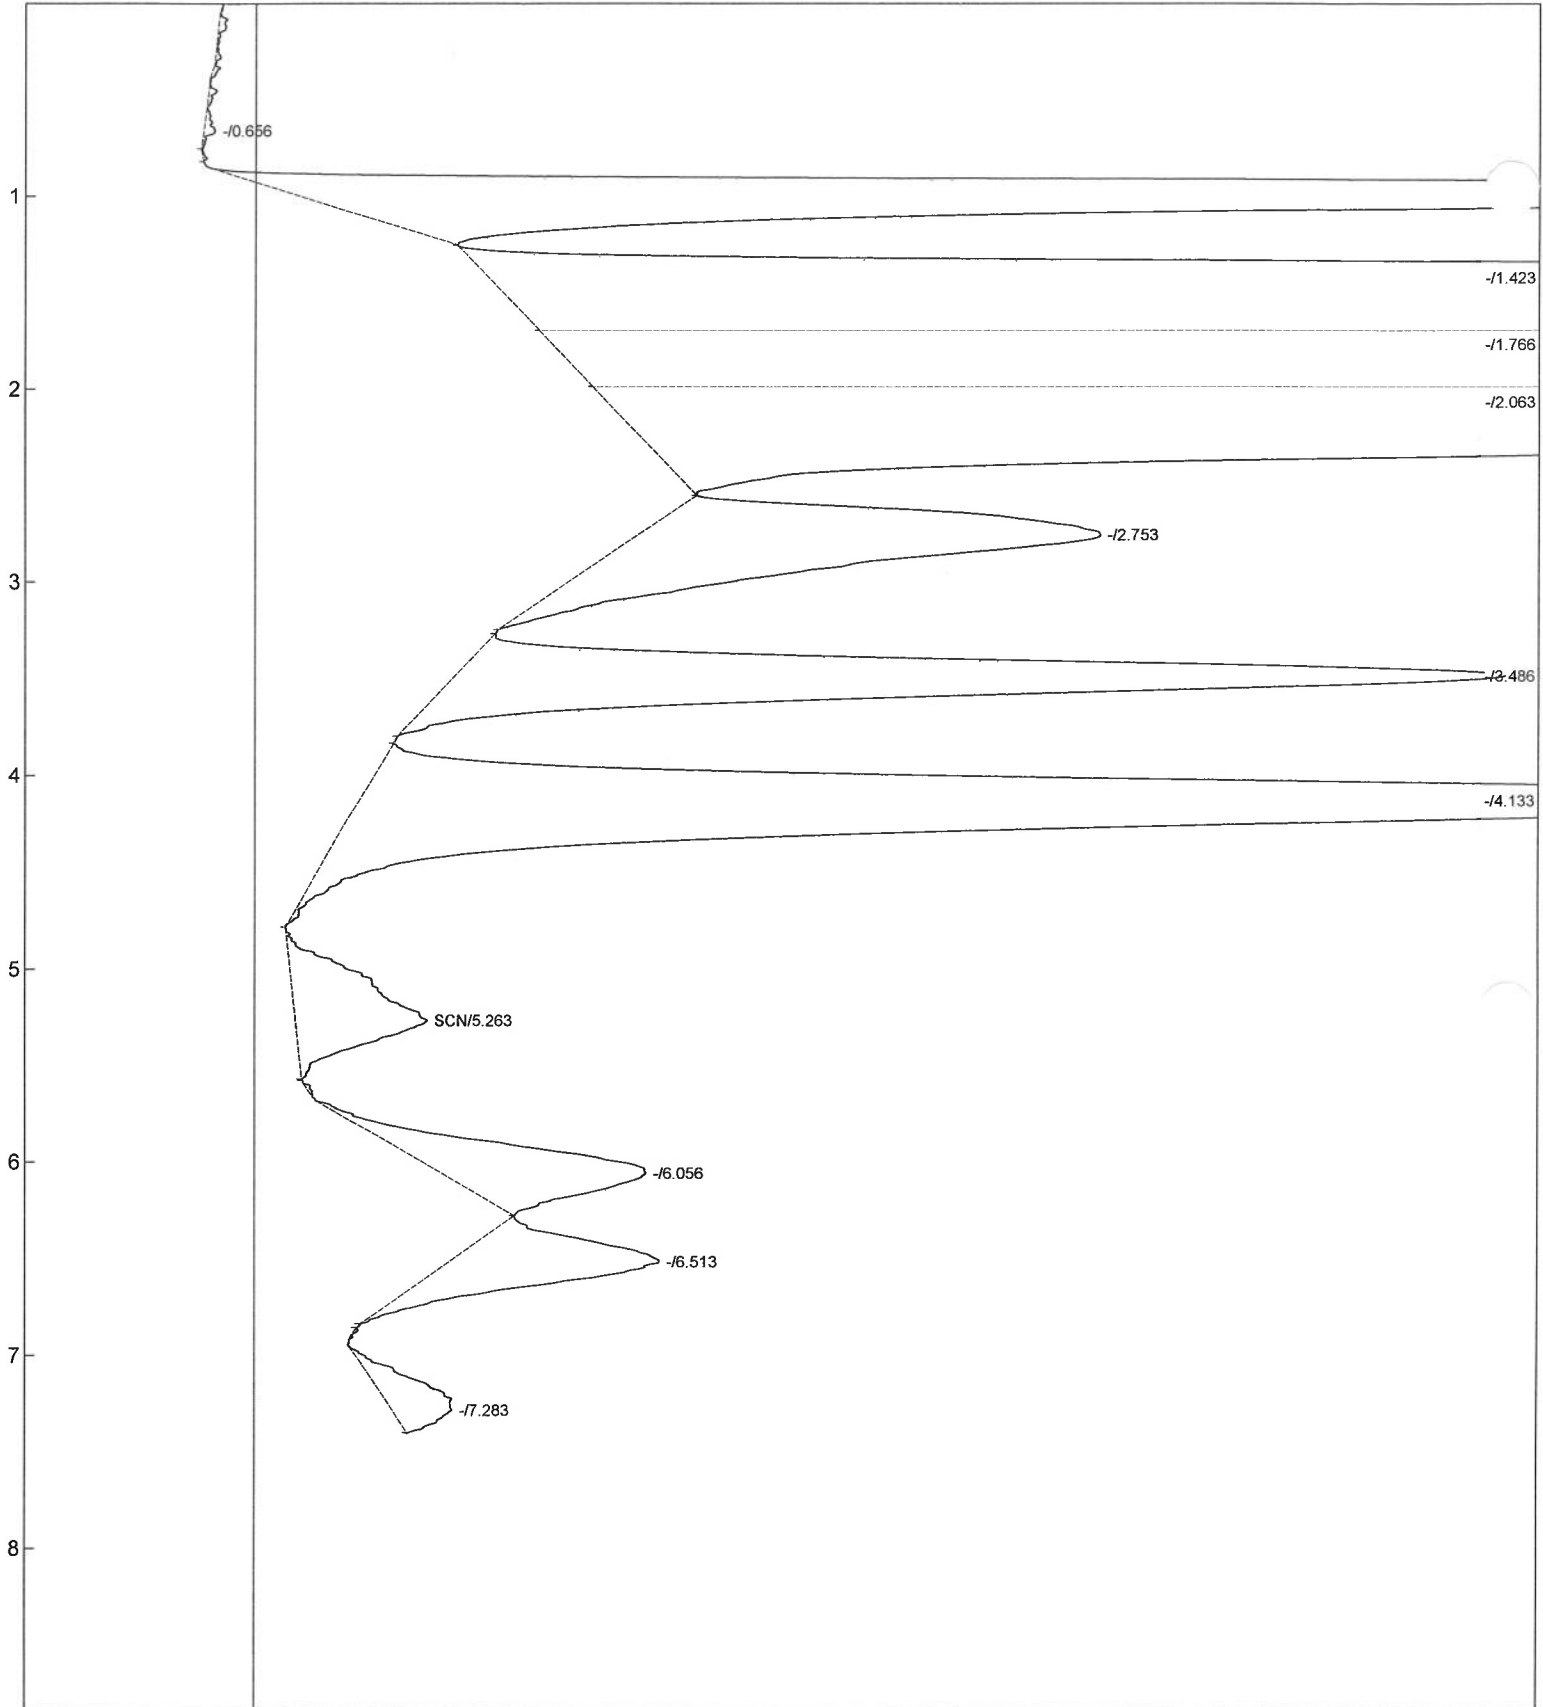

| Component | Retention | Area    | External | Units |
|-----------|-----------|---------|----------|-------|
| SCN       | 5.263     | 31.3406 | 0.0000   |       |
|           |           | 31.3406 | 0.0000   |       |

182  
 4/23/18  
 PSI-1270

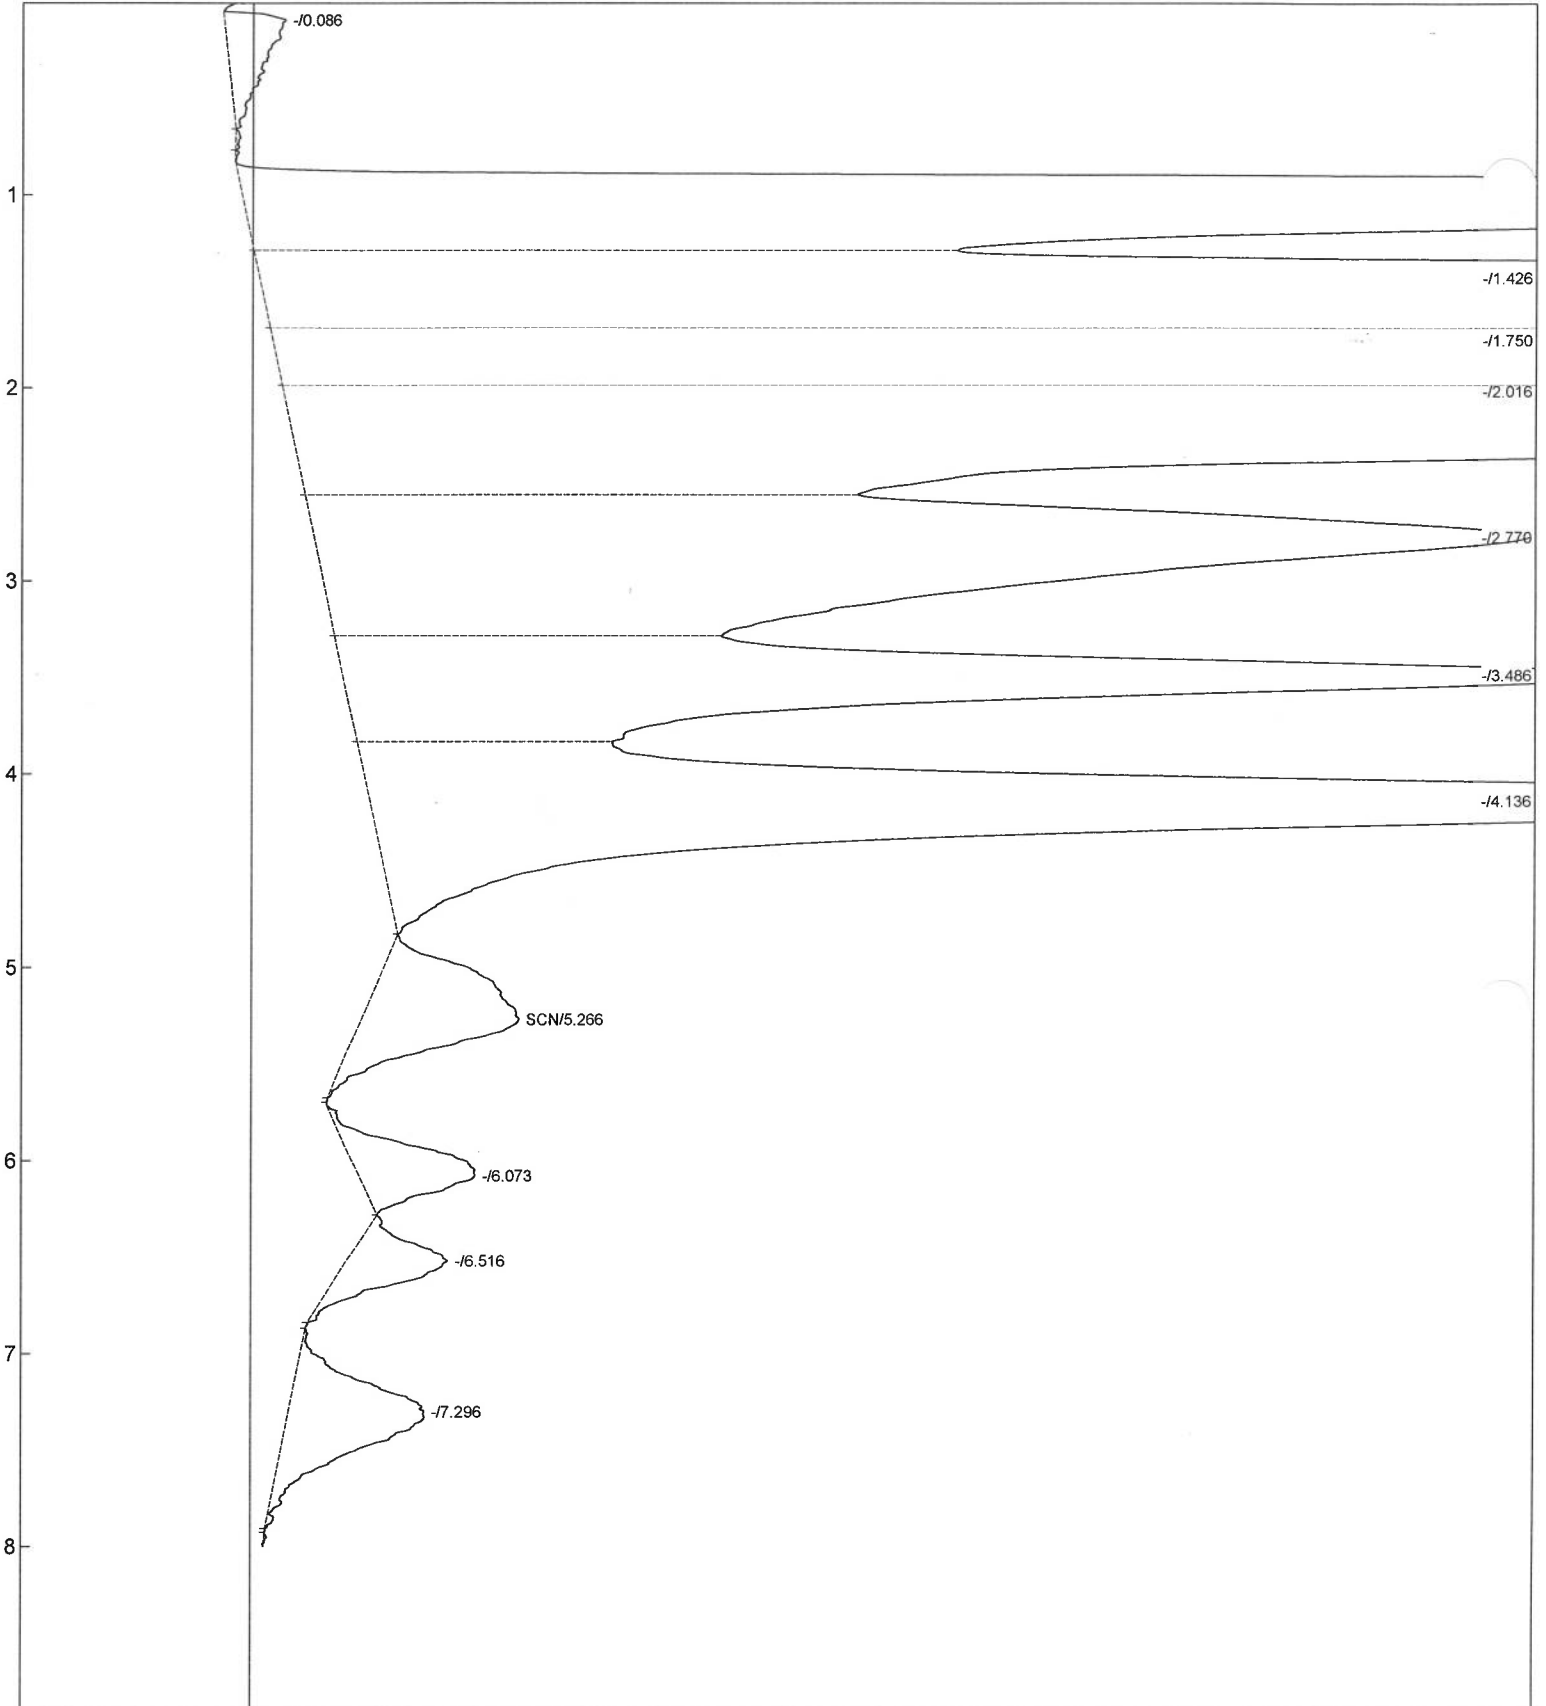

| Component | Retention | Area    | External Units |
|-----------|-----------|---------|----------------|
| SCN       | 5.266     | 44.6340 | 0.0000         |
|           |           | 44.6340 | 0.0000         |

184  
 7/23/18  
 1280PS

Lab name: RWU SCN Project

Client:

Client ID:

Analysis date: 08/02/2018 13:27:04

Method: Autosampler

Description: UV-Detector 220nm

Column: C30-UG-5 02021868-mx

Carrier: NaSO4 350mM 8/1

Integration: Peak sens=90.0 Base sens=40.0 Min area= 0.50 Standard= 1.000 Sample= 1.000 Tangents=off

Data file: SCN\_Standard\_Calibration\_08022018\_12.ASC ()

Sample:

Comments: TYPE YOUR COMMENTS HERE

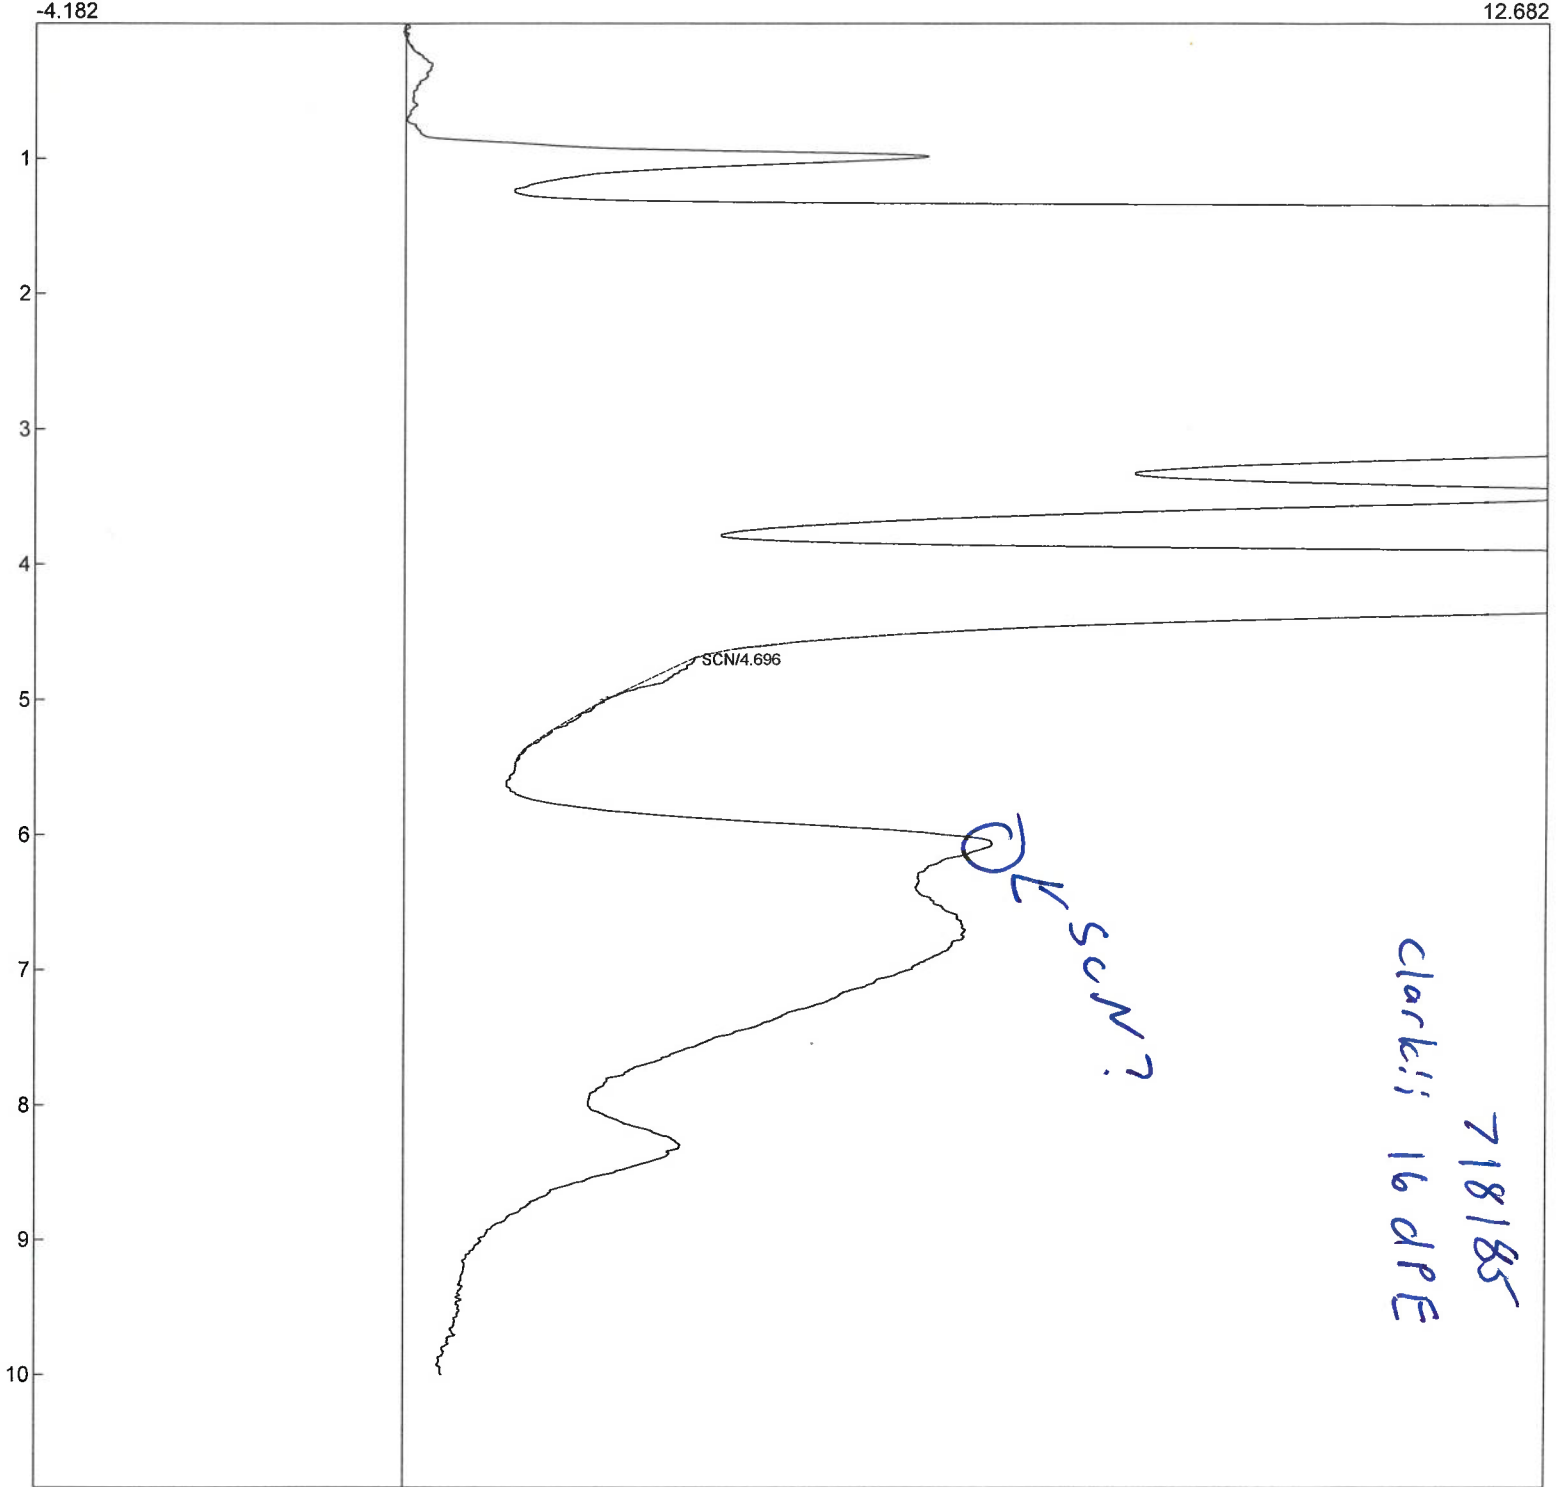

| Component | Retention | Area   | External | Units |
|-----------|-----------|--------|----------|-------|
| SCN       | 4.696     | 2.2162 | 0.0000   |       |
|           |           | 2.2162 | 0.0000   |       |

Lab name: RWU SCN Project

Client:

Client ID:

Analysis date: 08/02/2018 13:38:18

Method: Autosampler

Description: UV-Detector 220nm

Column: C30-UG-5 02021868-mx

Carrier: NaSO4 350mM 8/1

Integration: Peak sens=90.0 Base sens=40.0 Min area= 0.50 Standard= 1.000 Sample= 1.000 Tangents=off

Data file: SCN\_Standard\_Calibration\_08022018\_13.ASC ()

Sample:

Comments: TYPE YOUR COMMENTS HERE

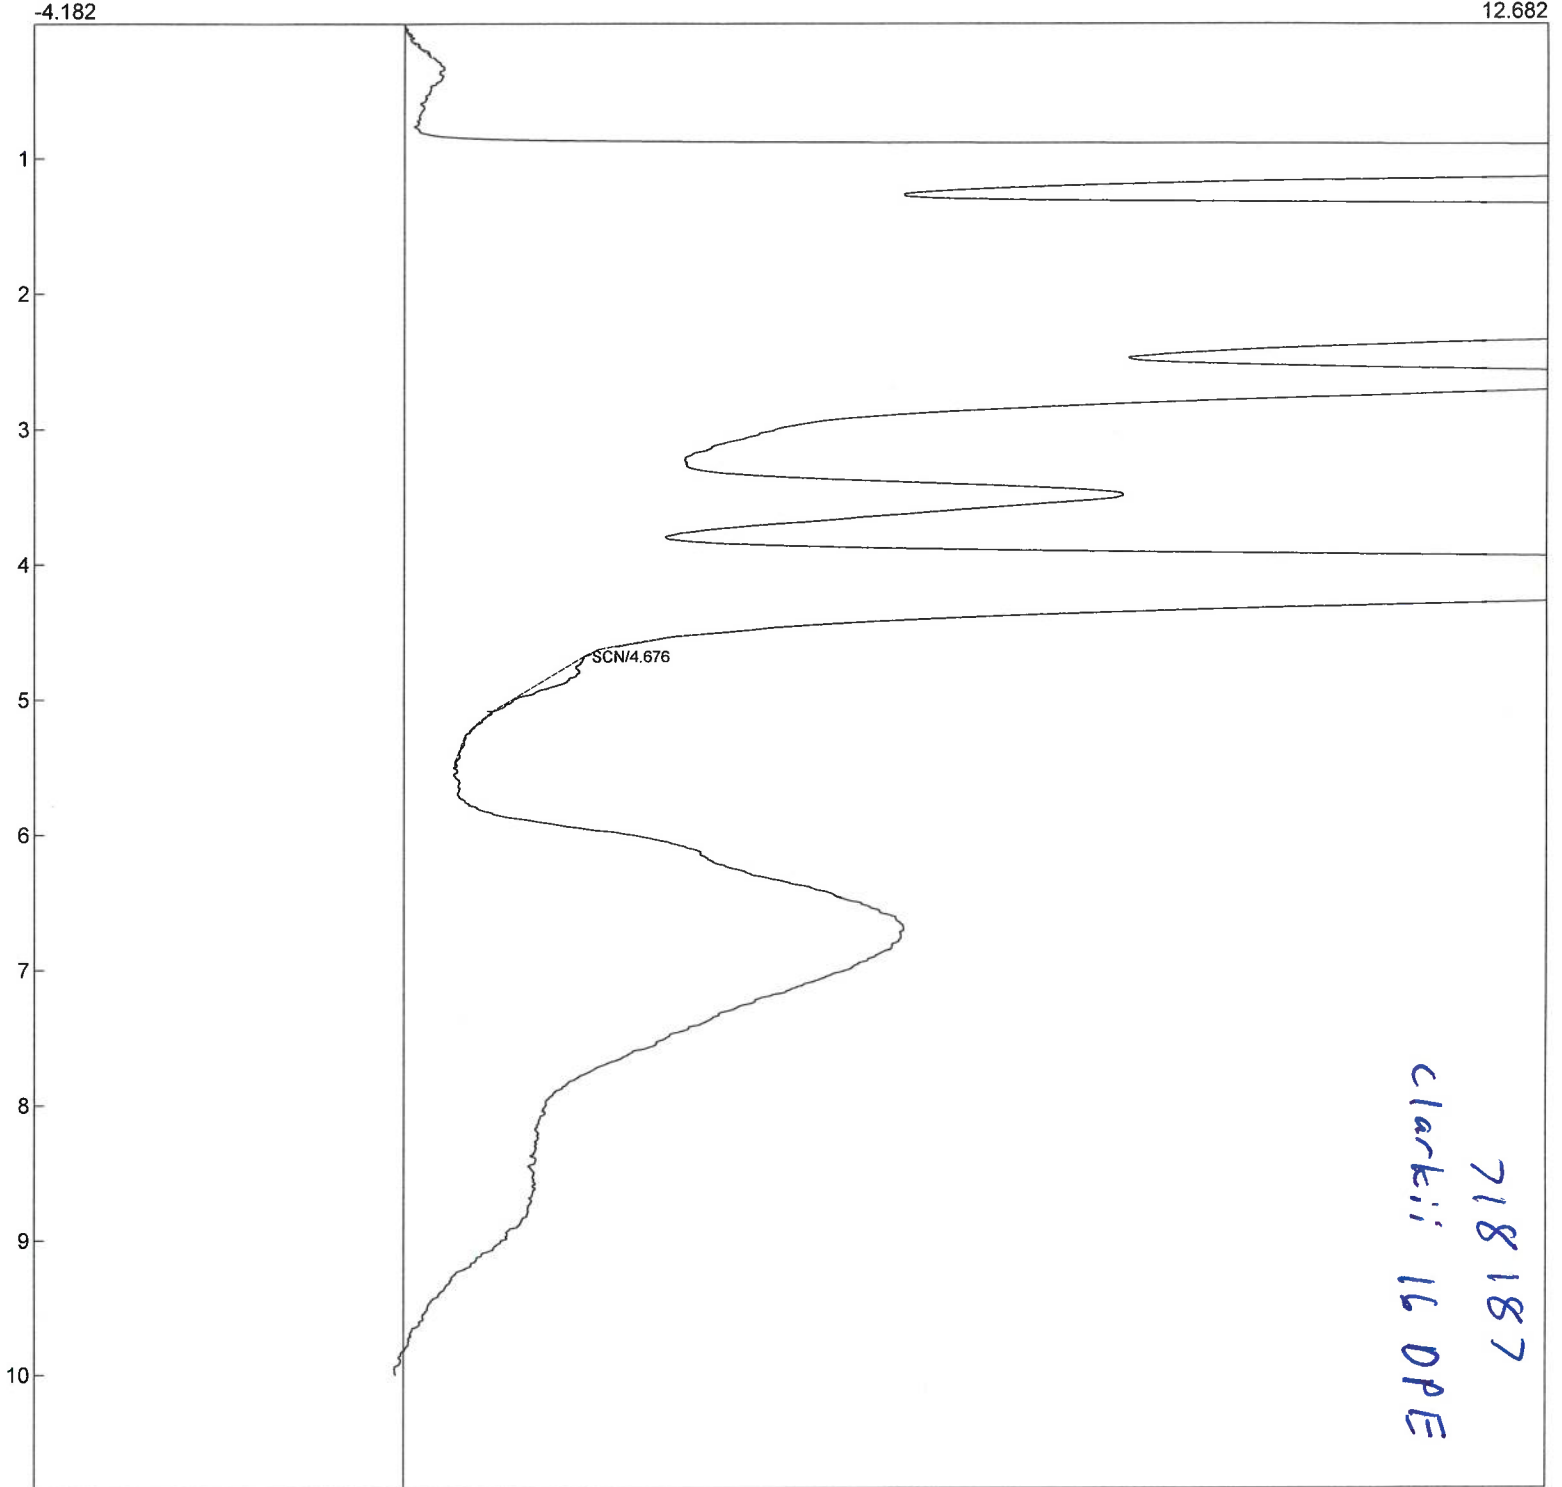

| Component | Retention | Area   | External | Units |
|-----------|-----------|--------|----------|-------|
| SCN       | 4.676     | 3.2950 | 0.0000   |       |
|           |           | 3.2950 | 0.0000   |       |

Lab name: RWU SCN Project  
 Client:  
 Client ID:  
 Analysis date: 08/02/2018 15:54:13  
 Method: Autosampler  
 Description: UV-Detector 220nm  
 Column: C30-UG-5 02021868-mx  
 Carrier: NaSO4 350mM 8/1  
 Integration: Peak sens=90.0 Base sens=40.0 Min area= 0.50 Standard= 1.000 Sample= 1.000 Tangents=off  
 Data file: SCN\_Standard\_Calibration\_08022018\_20.ASC ()  
 Sample:  
 Comments: TYPE YOUR COMMENTS HERE

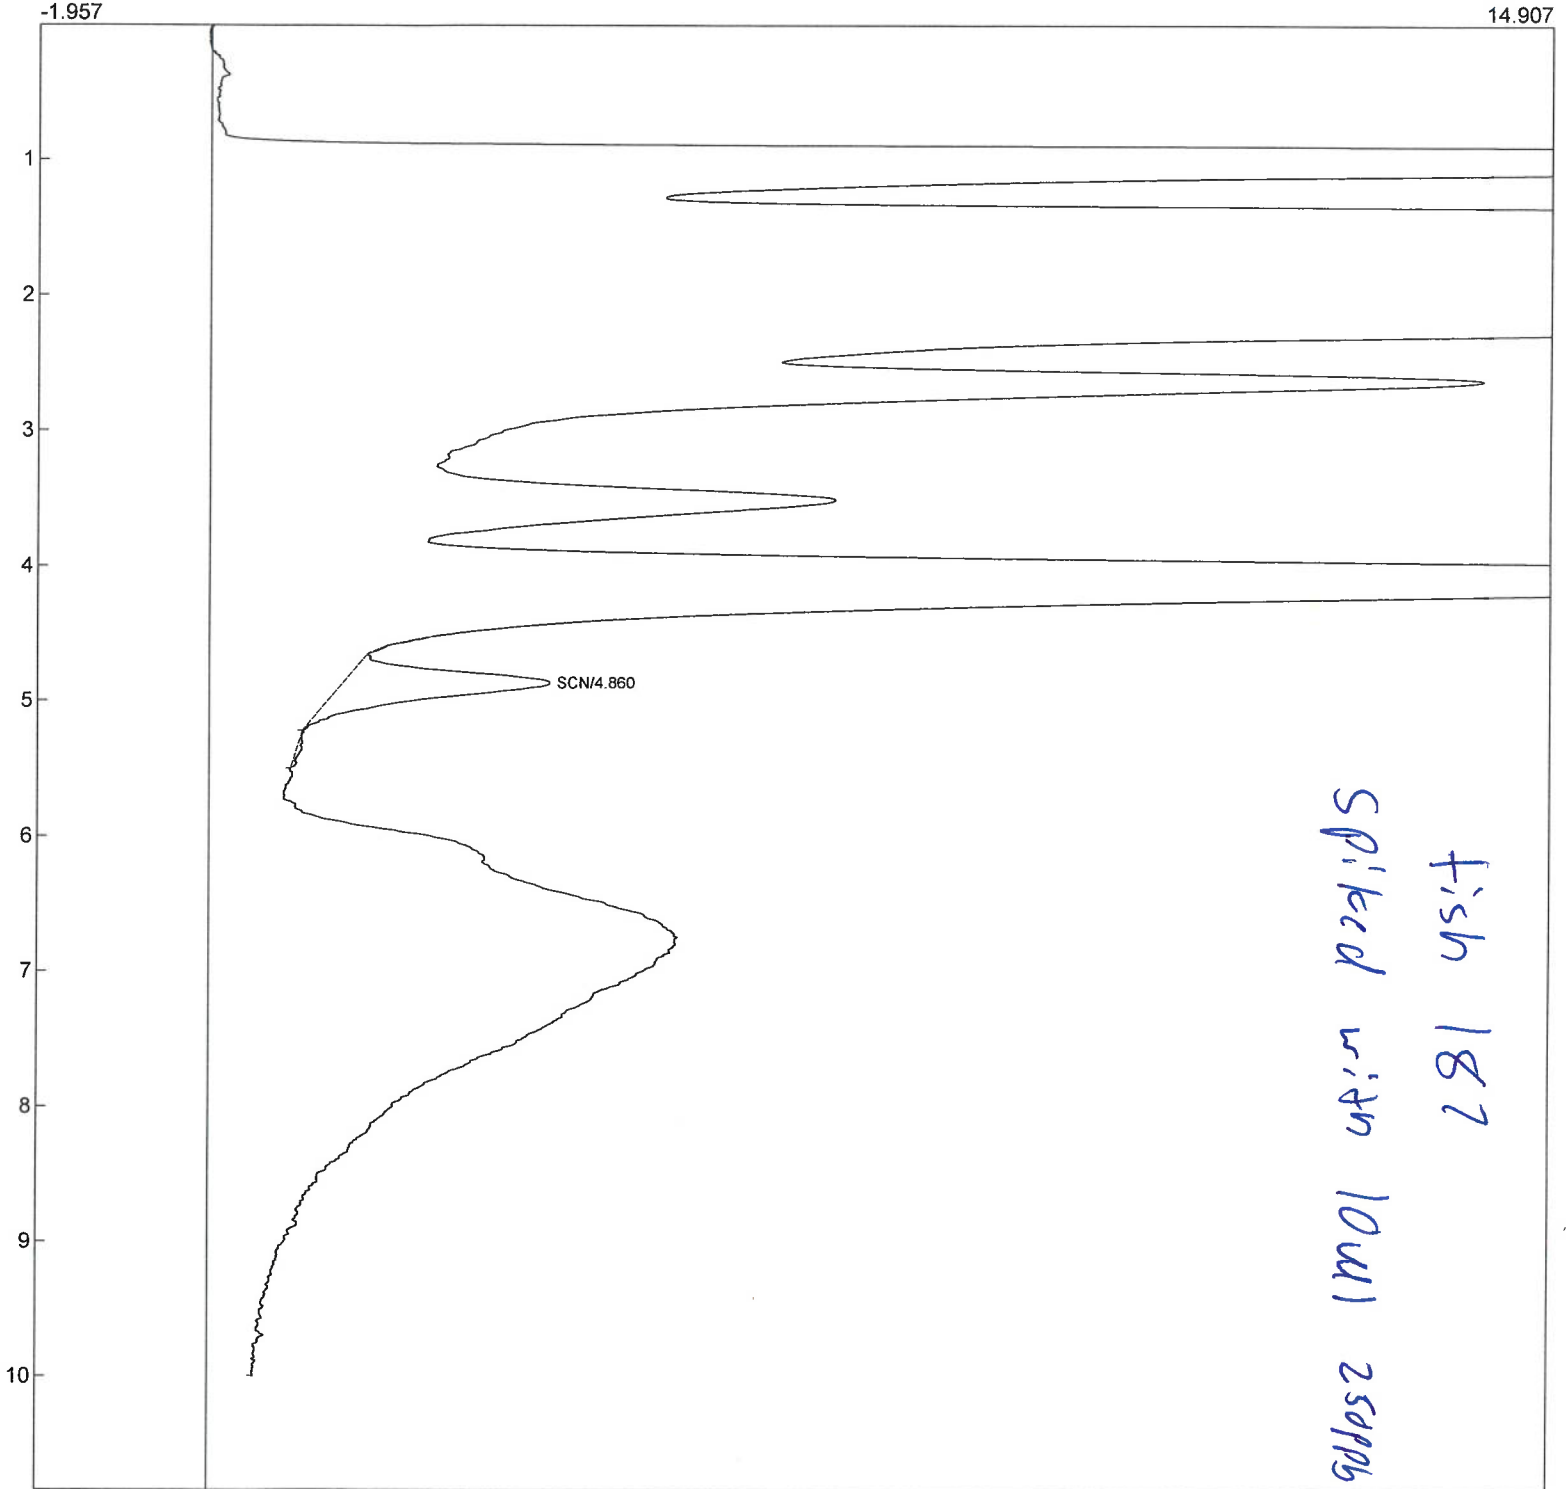

| Component | Retention | Area    | External | Units |
|-----------|-----------|---------|----------|-------|
| SCN       | 4.860     | 30.4052 | 0.0000   |       |
|           |           | 30.4052 | 0.0000   |       |



Lab name: RWU SCN Project

Client:

Client ID:

Analysis date: 08/03/2018 15:47:17

Method: Autosampler

Description: UV-Detector 220nm

Column: C30-UG-5 02021868-mx

Carrier: NaSO4 350mM 8/1

Integration: Peak sens=90.0 Base sens=40.0 Min area= 0.50 Standard= 1.000 Sample= 1.000 Tangents=off

Data file: SCN\_Fish\_08032018\_11.ASC ()

Sample:

Comments: TYPE YOUR COMMENTS HERE

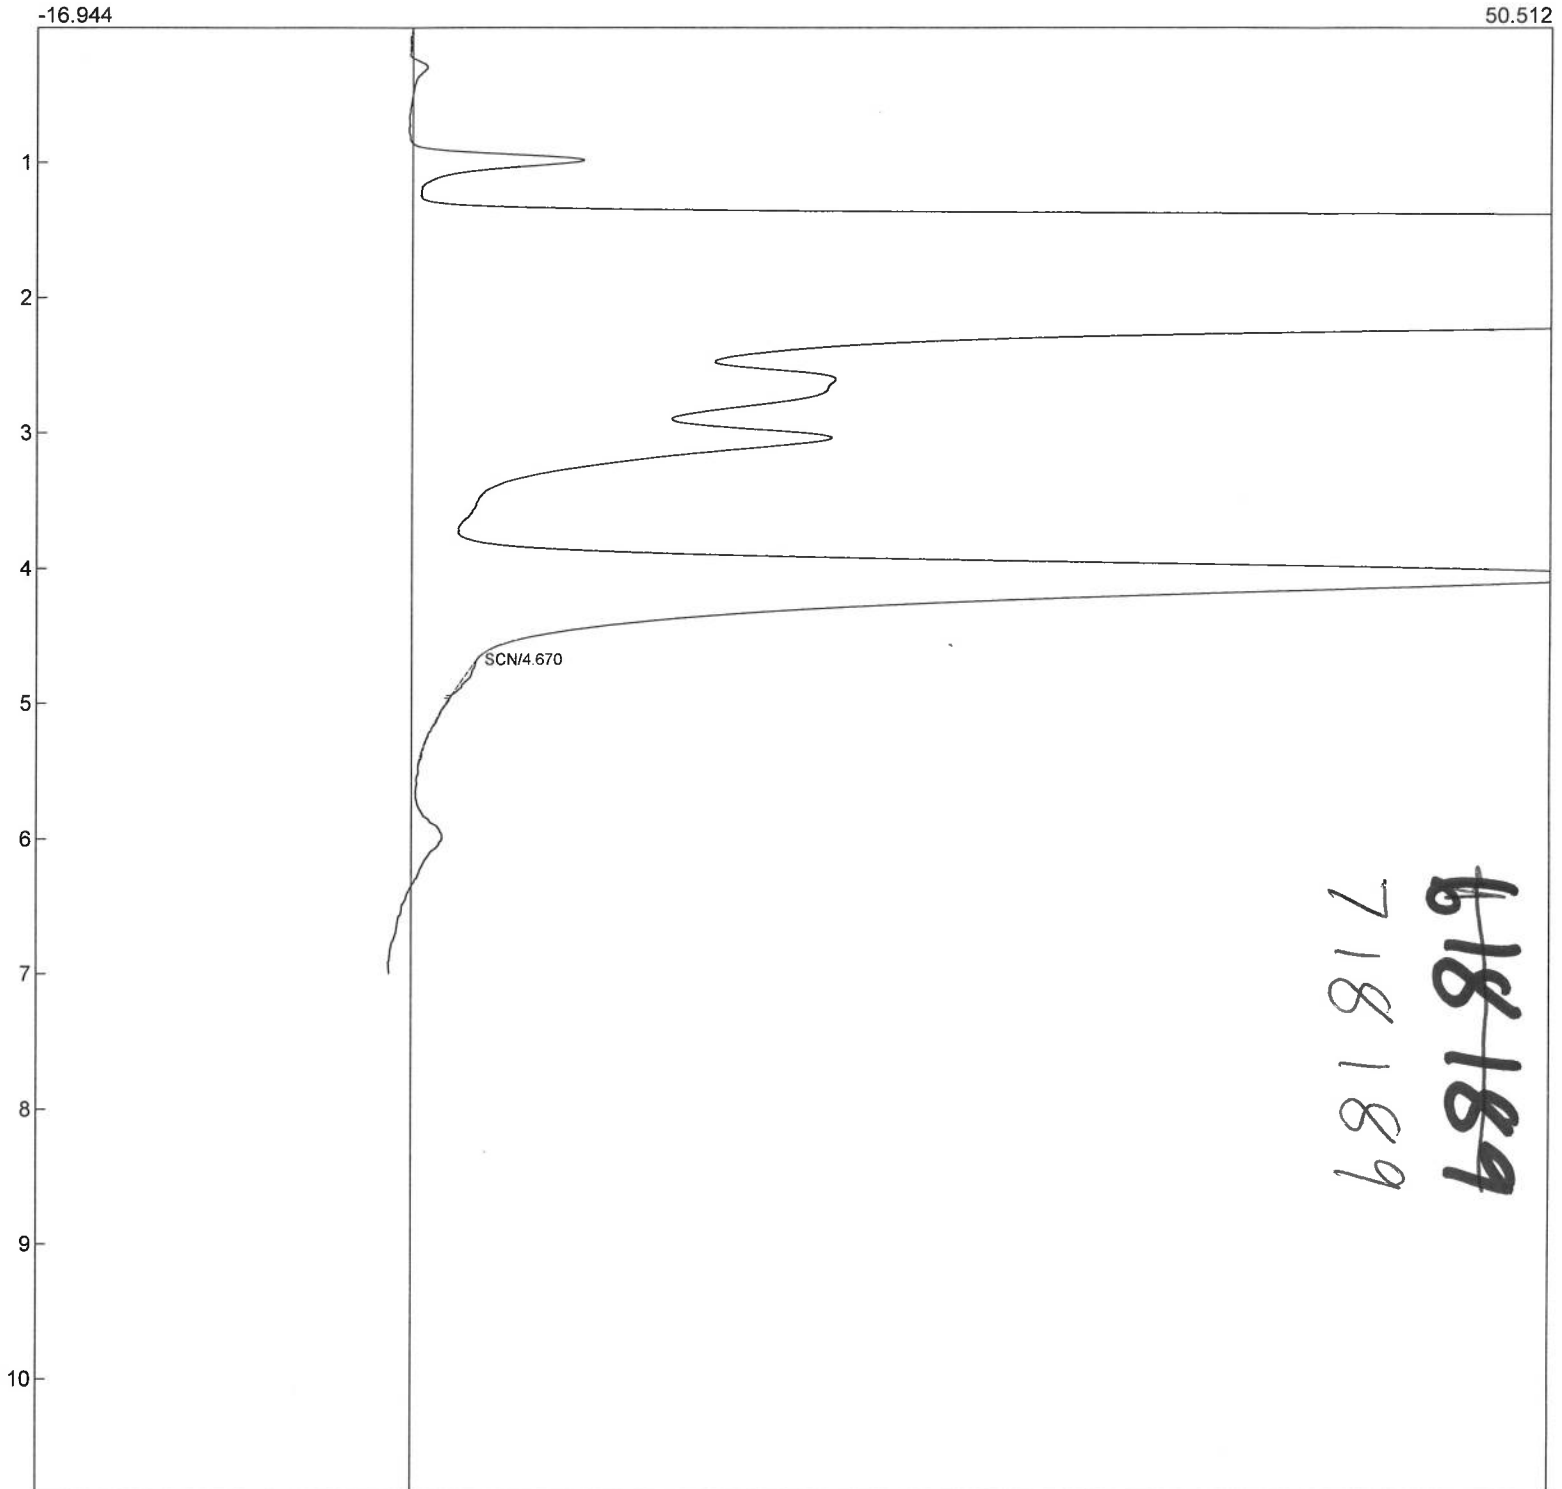

| Component | Retention | Area   | External | Units |
|-----------|-----------|--------|----------|-------|
| SCN       | 4.670     | 2.5286 | 3.7476   |       |
|           |           | 2.5286 | 3.7476   |       |

Lab name: RWU SCN Project

Client:

Client ID:

Analysis date: 08/03/2018 15:55:21

Method: Autosampler

Description: UV-Detector 220nm

Column: C30-UG-5 02021868-mx

Carrier: NaSO4 350mM 8/1

Integration: Peak sens=90.0 Base sens=40.0 Min area= 0.50 Standard= 1.000 Sample= 1.000 Tangents=off

Data file: SCN\_Fish\_08032018\_12.ASC ()

Sample:

Comments: TYPE YOUR COMMENTS HERE

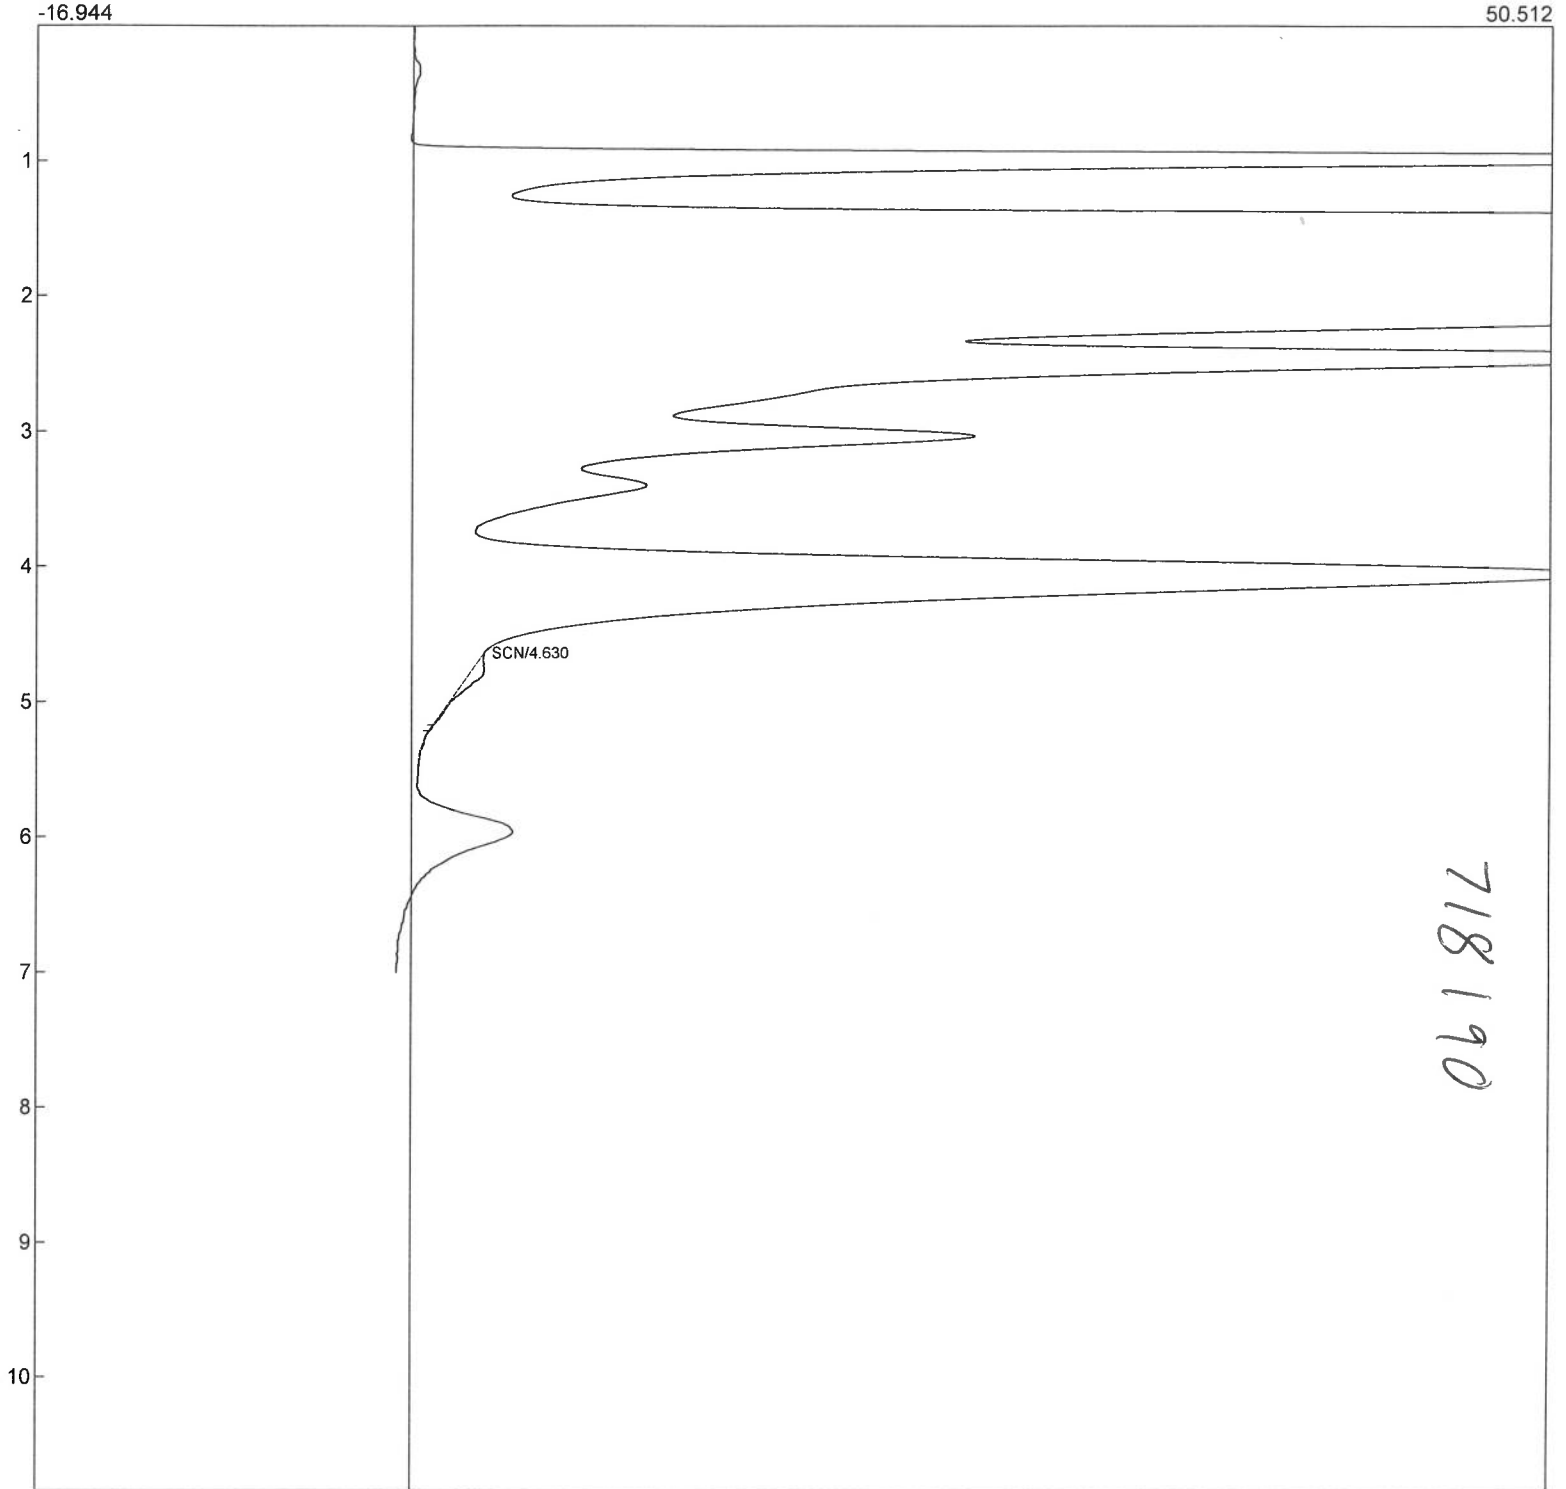

| Component | Retention | Area   | External | Units |
|-----------|-----------|--------|----------|-------|
| SCN       | 4.630     | 8.1430 | 12.0685  |       |
|           |           | 8.1430 | 12.0685  |       |

Lab name: RWU SCN Project  
Client:  
Client ID:

Analysis date: 08/03/2018 16:03:27

Method: Autosampler

Description: UV-Detector 220nm

Column: C30-UG-5 02021868-mx

Carrier: NaSO4 350mM 8/1

Integration: Peak sens=90.0 Base sens=40.0 Min area= 0.50 Standard= 1.000 Sample= 1.000 Tangents=off

Data file: SCN\_Fish\_08032018\_13.ASC ()

Sample:

Comments: TYPE YOUR COMMENTS HERE

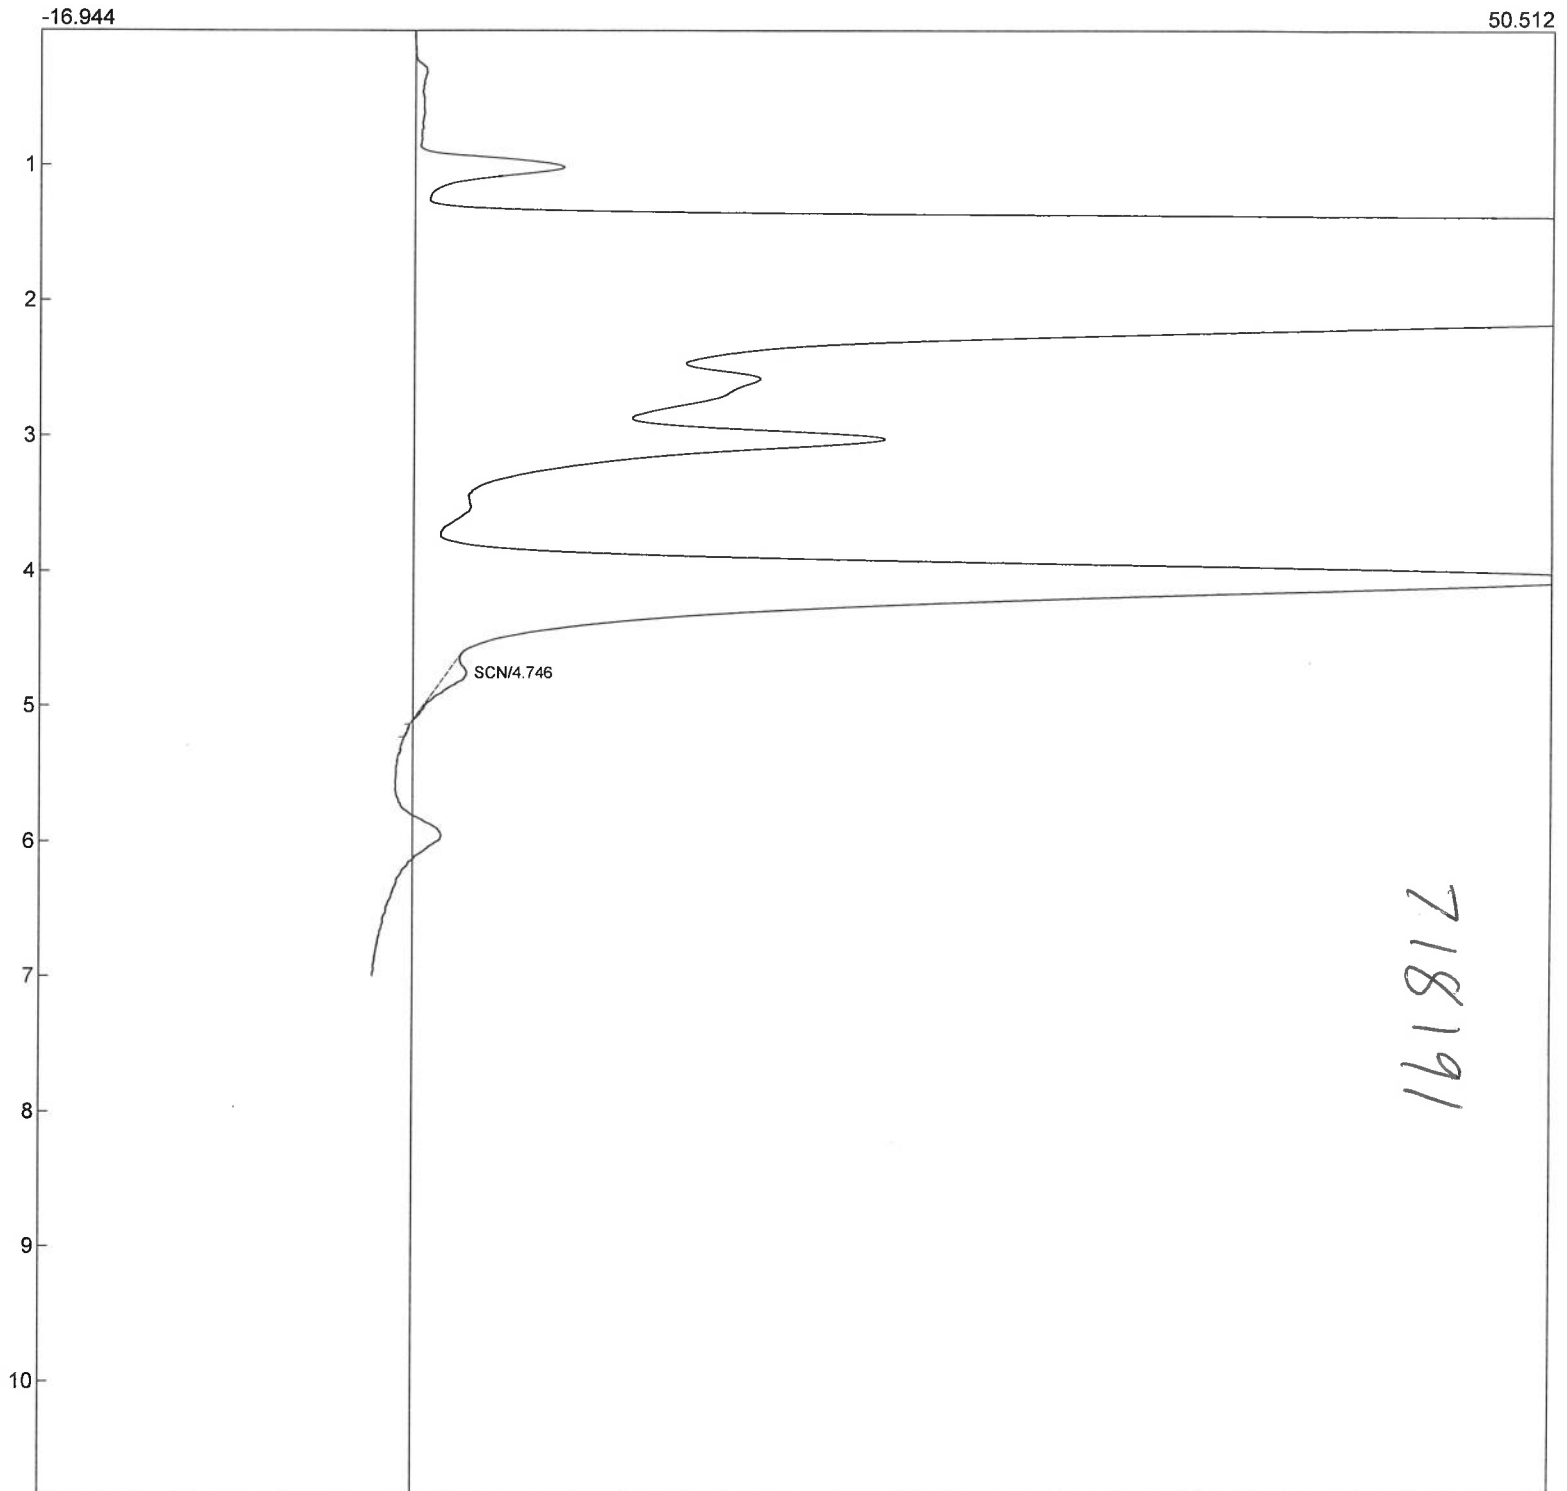

| Component | Retention | Area    | External | Units |
|-----------|-----------|---------|----------|-------|
| SCN       | 4.746     | 11.0671 | 16.4022  |       |
|           |           | 11.0671 | 16.4022  |       |

Lab name: RWU SCN Project  
 Client:  
 Client ID:  
 Analysis date: 08/03/2018 16:11:32  
 Method: Autosampler  
 Description: UV-Detector 220nm  
 Column: C30-UG-5 02021868-mx  
 Carrier: NaSO4 350mM 8/1  
 Integration: Peak sens=90.0 Base sens=40.0 Min area= 0.50 Standard= 1.000 Sample= 1.000 Tangents=off  
 Data file: SCN\_Fish\_08032018\_14.ASC ()  
 Sample:  
 Comments: TYPE YOUR COMMENTS HERE

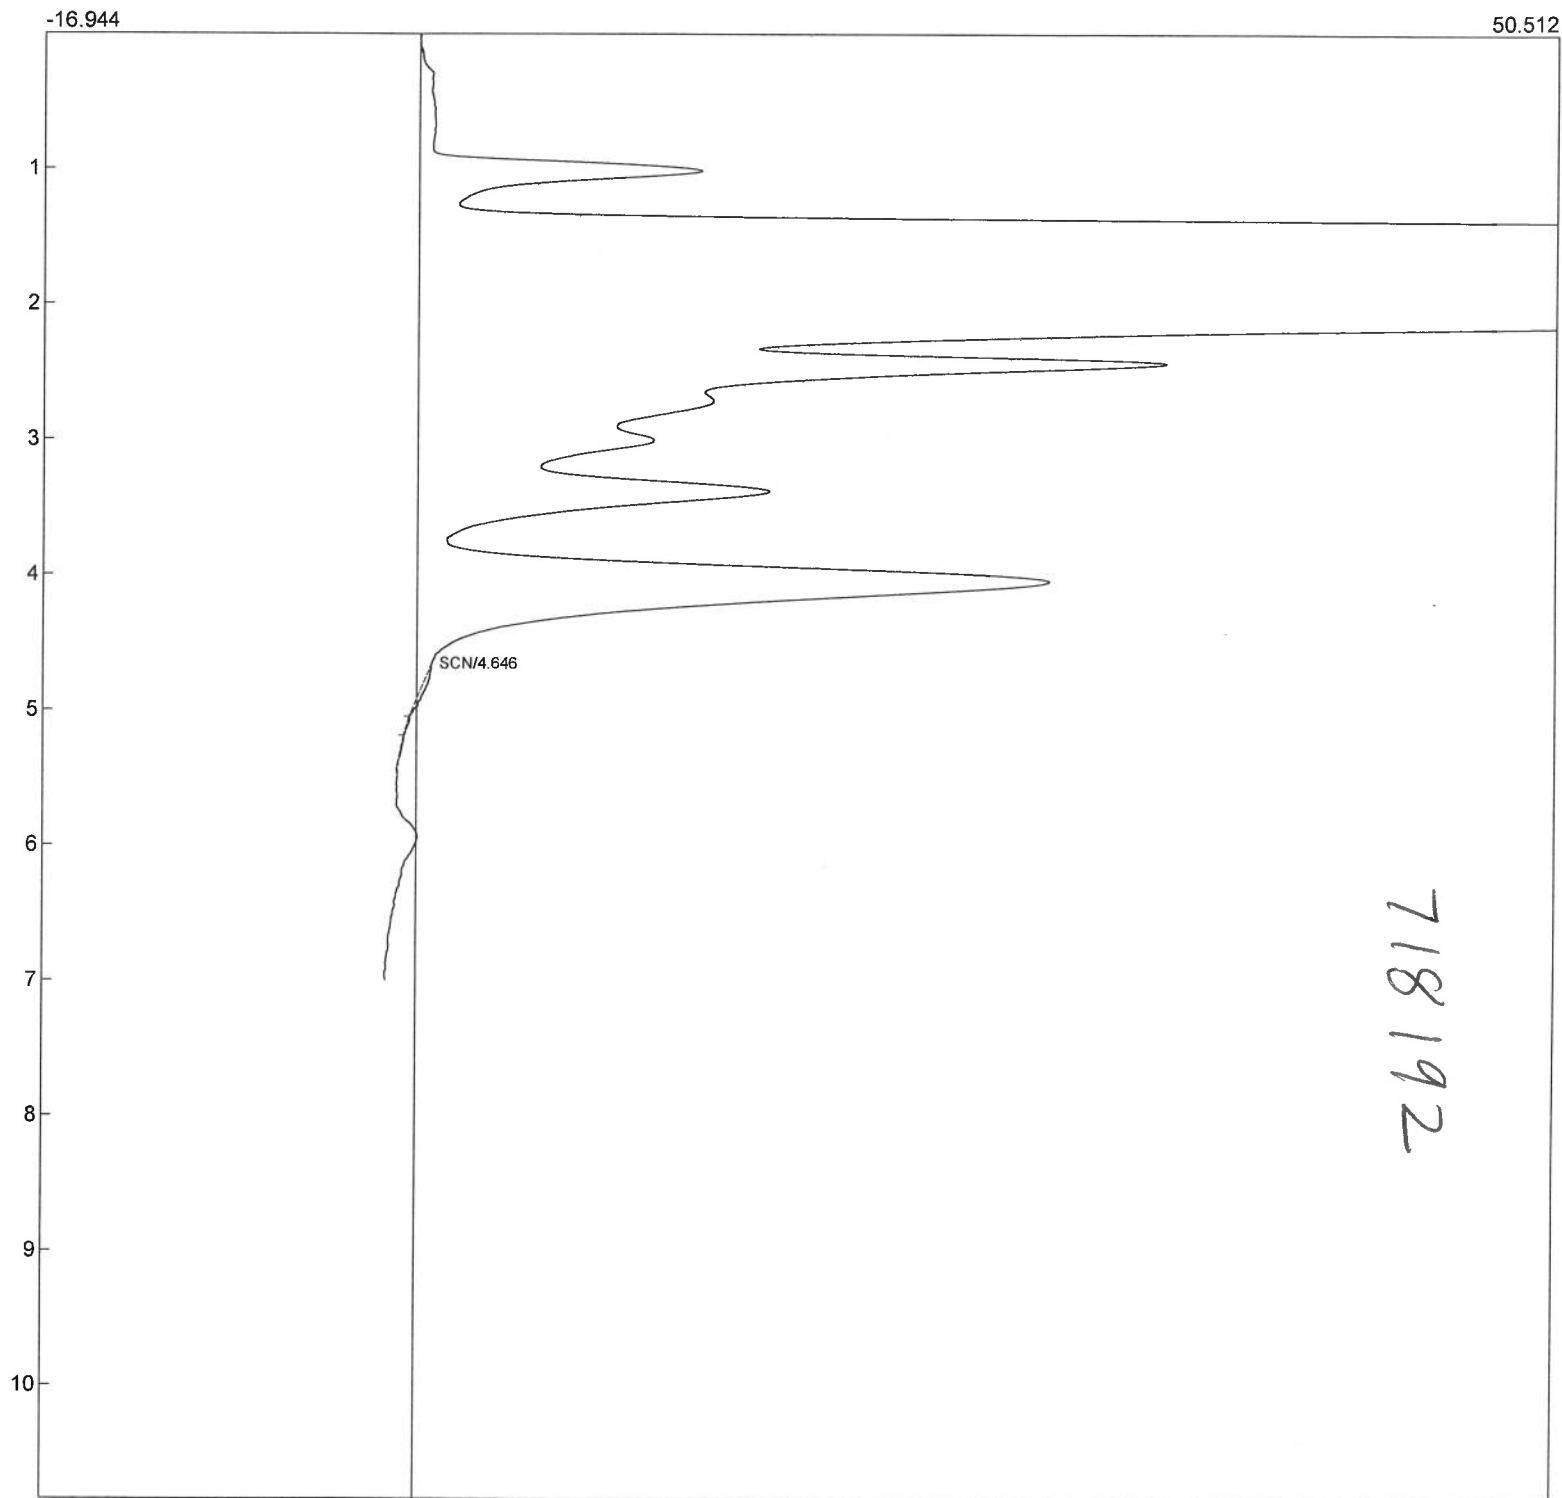

| Component | Retention | Area   | External | Units |
|-----------|-----------|--------|----------|-------|
| SCN       | 4.646     | 3.2982 | 4.8882   |       |
|           |           | 3.2982 | 4.8882   |       |

Lab name: RWU SCN Project  
 Client:  
 Client ID:  
 Analysis date: 08/03/2018 16:19:43  
 Method: Autosampler  
 Description: UV-Detector 220nm  
 Column: C30-UG-5 02021868-mx  
 Carrier: NaSO4 350mM 8/1  
 Integration: Peak sens=90.0 Base sens=40.0 Min area= 0.50 Standard= 1.000 Sample= 1.000 Tangents=off  
 Data file: SCN\_Fish\_08032018\_15.ASC ()  
 Sample:  
 Comments: TYPE YOUR COMMENTS HERE

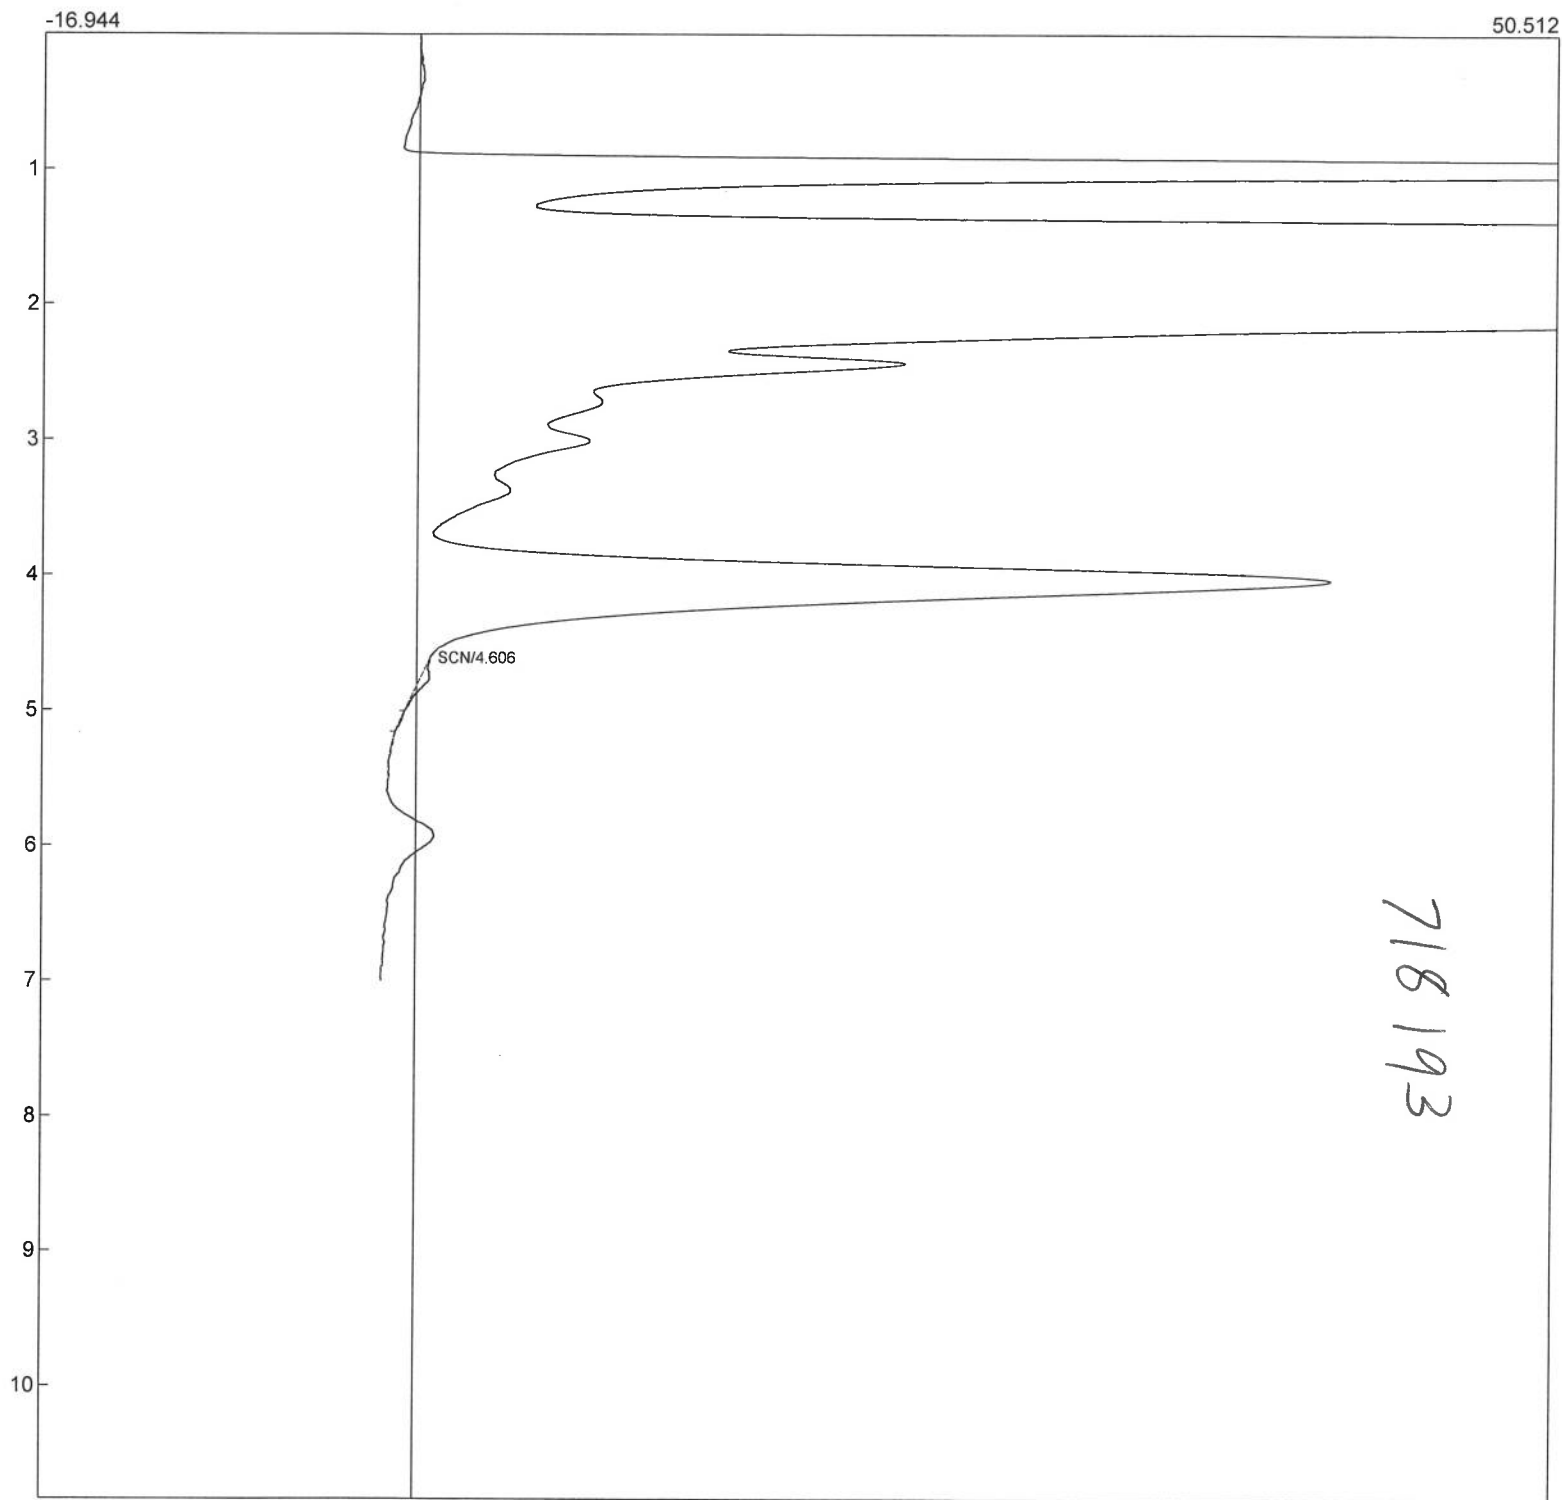

| Component | Retention | Area   | External | Units |
|-----------|-----------|--------|----------|-------|
| SCN       | 4.606     | 4.2341 | 6.2752   |       |
|           |           | 4.2341 | 6.2752   |       |

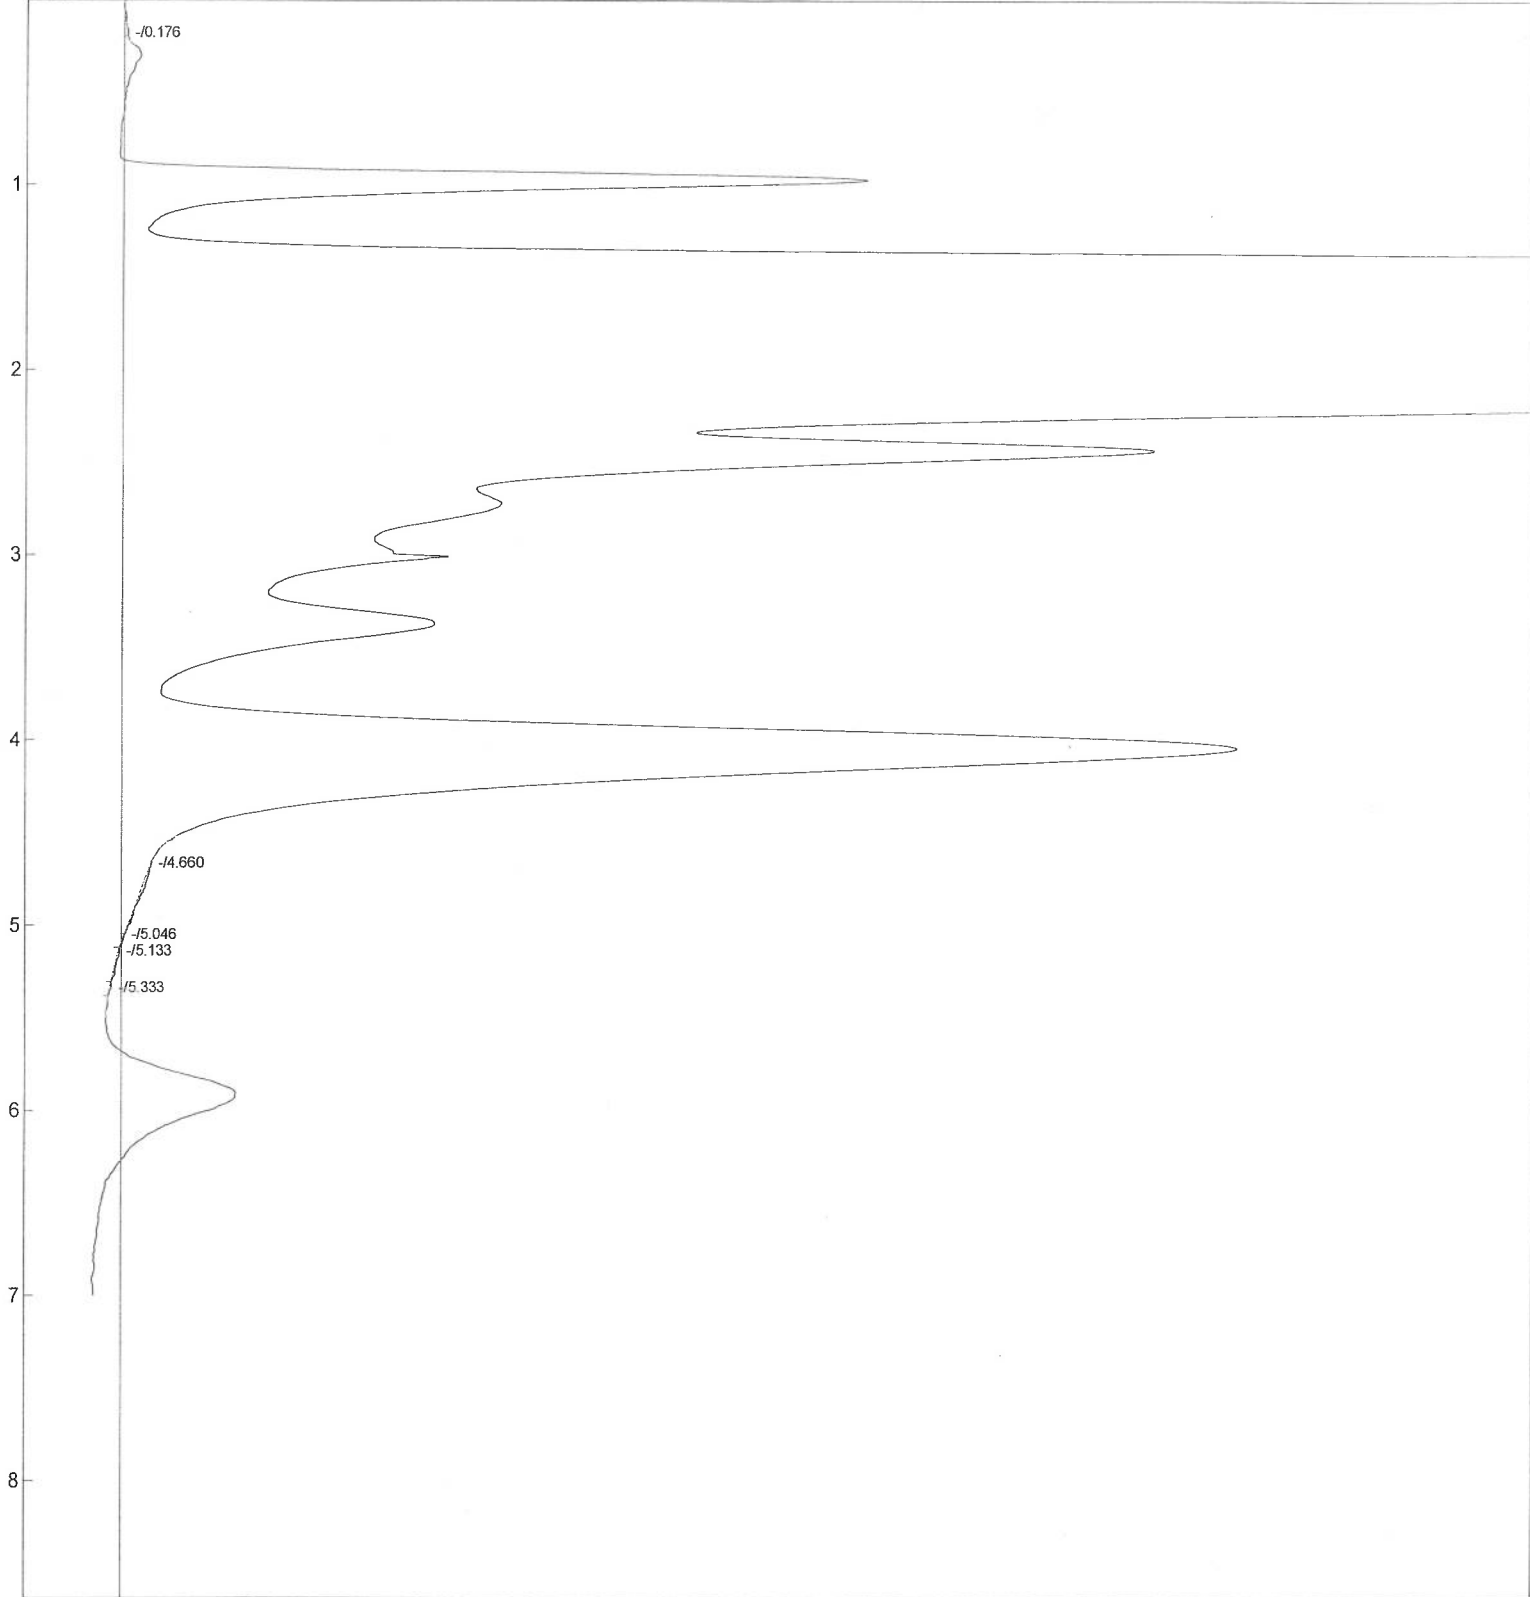

Reprinted  
718194

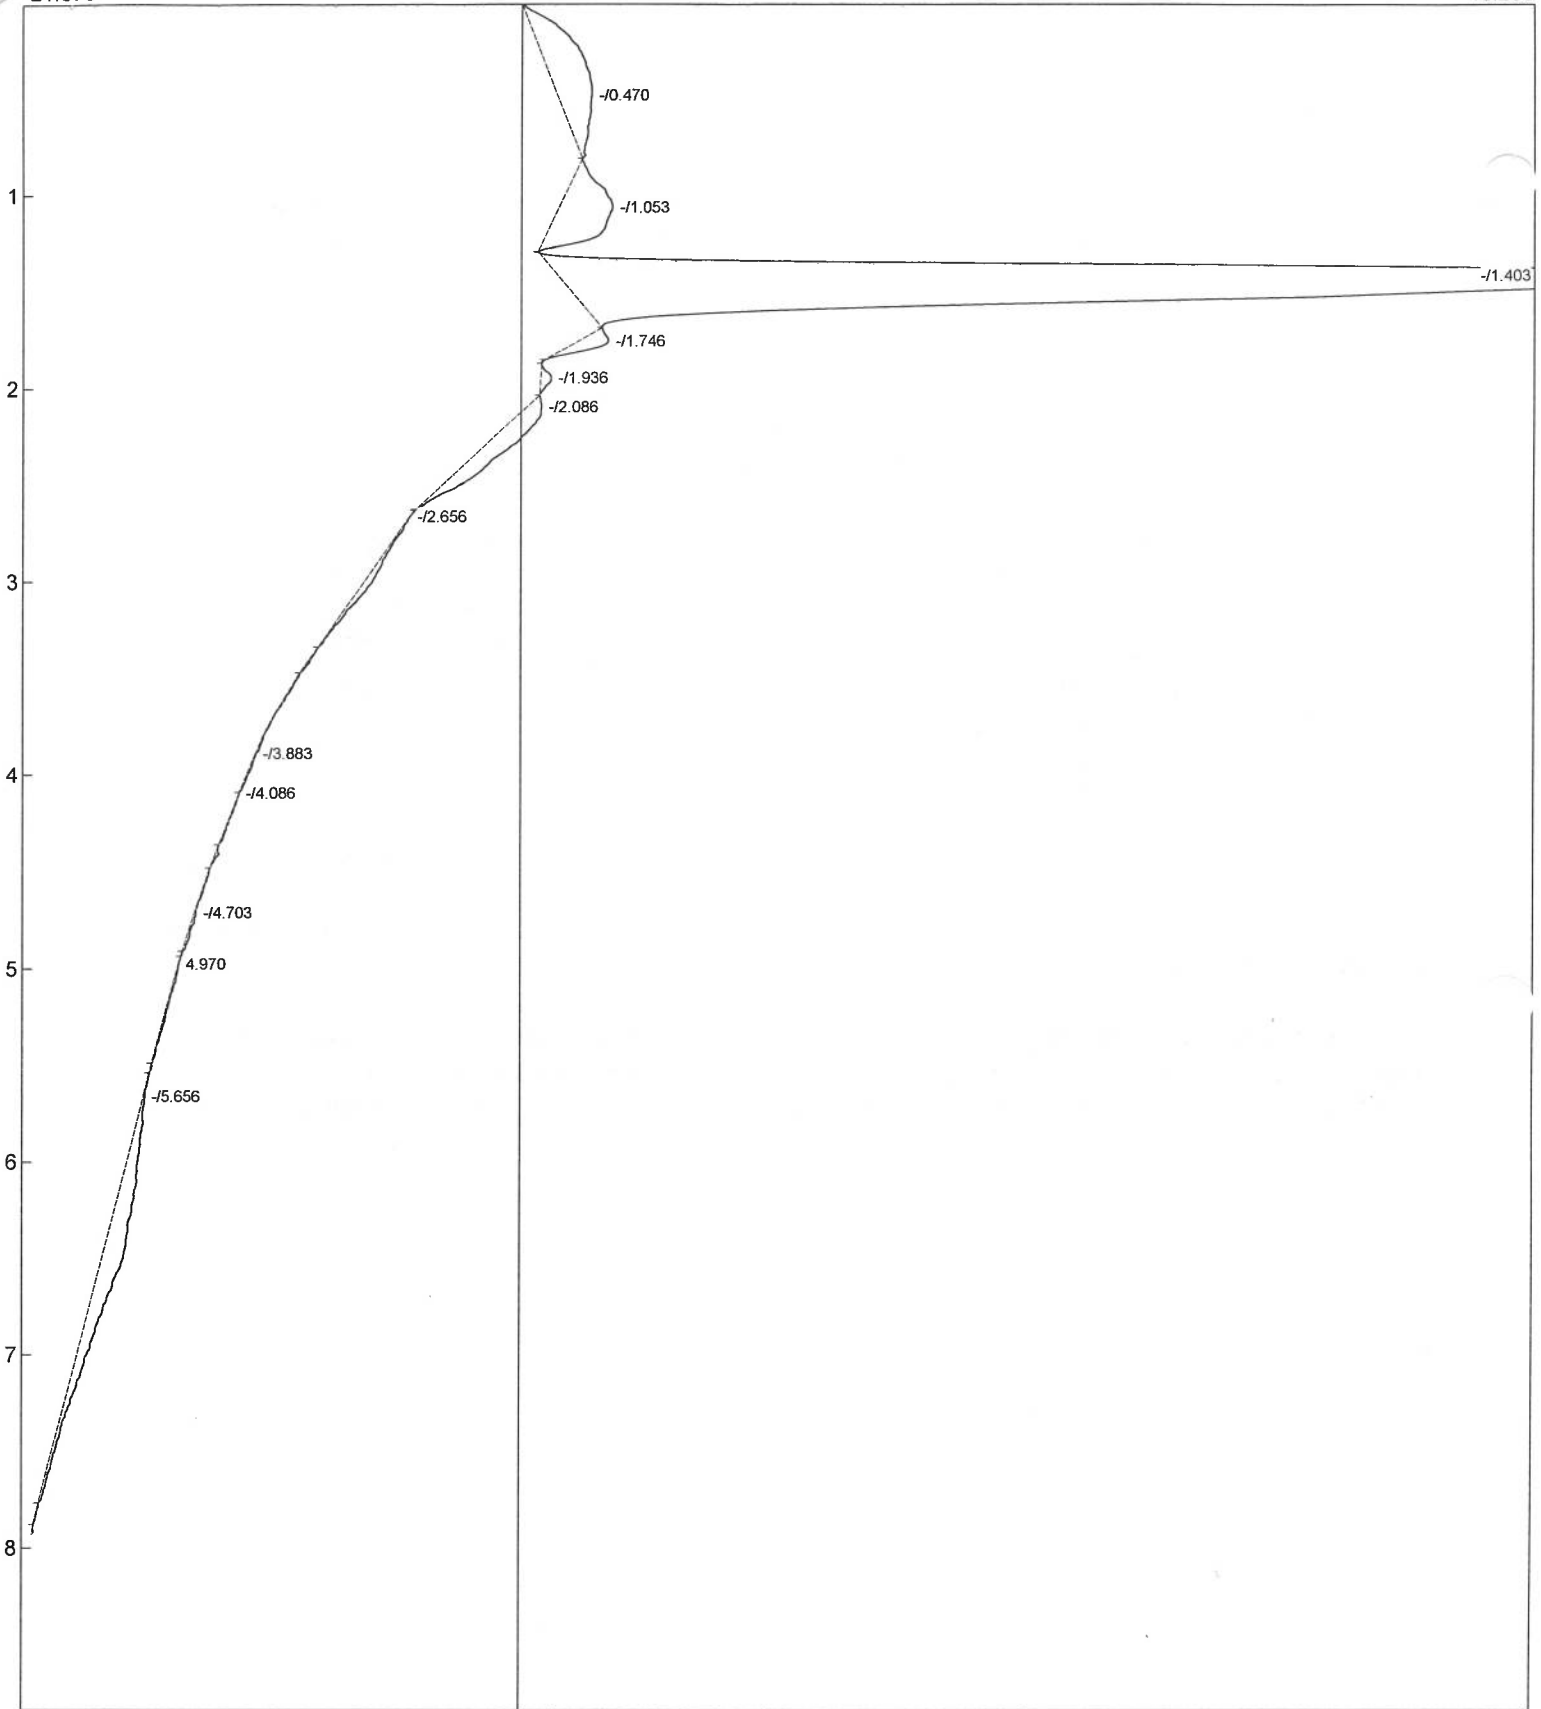

| Component | Retention | Area   | External Units |
|-----------|-----------|--------|----------------|
|           | 4.970     | 1.5012 | 0.0000         |
|           |           | 1.5012 | 0.0000         |

Blank  
 7/18/18  
 psi-1513

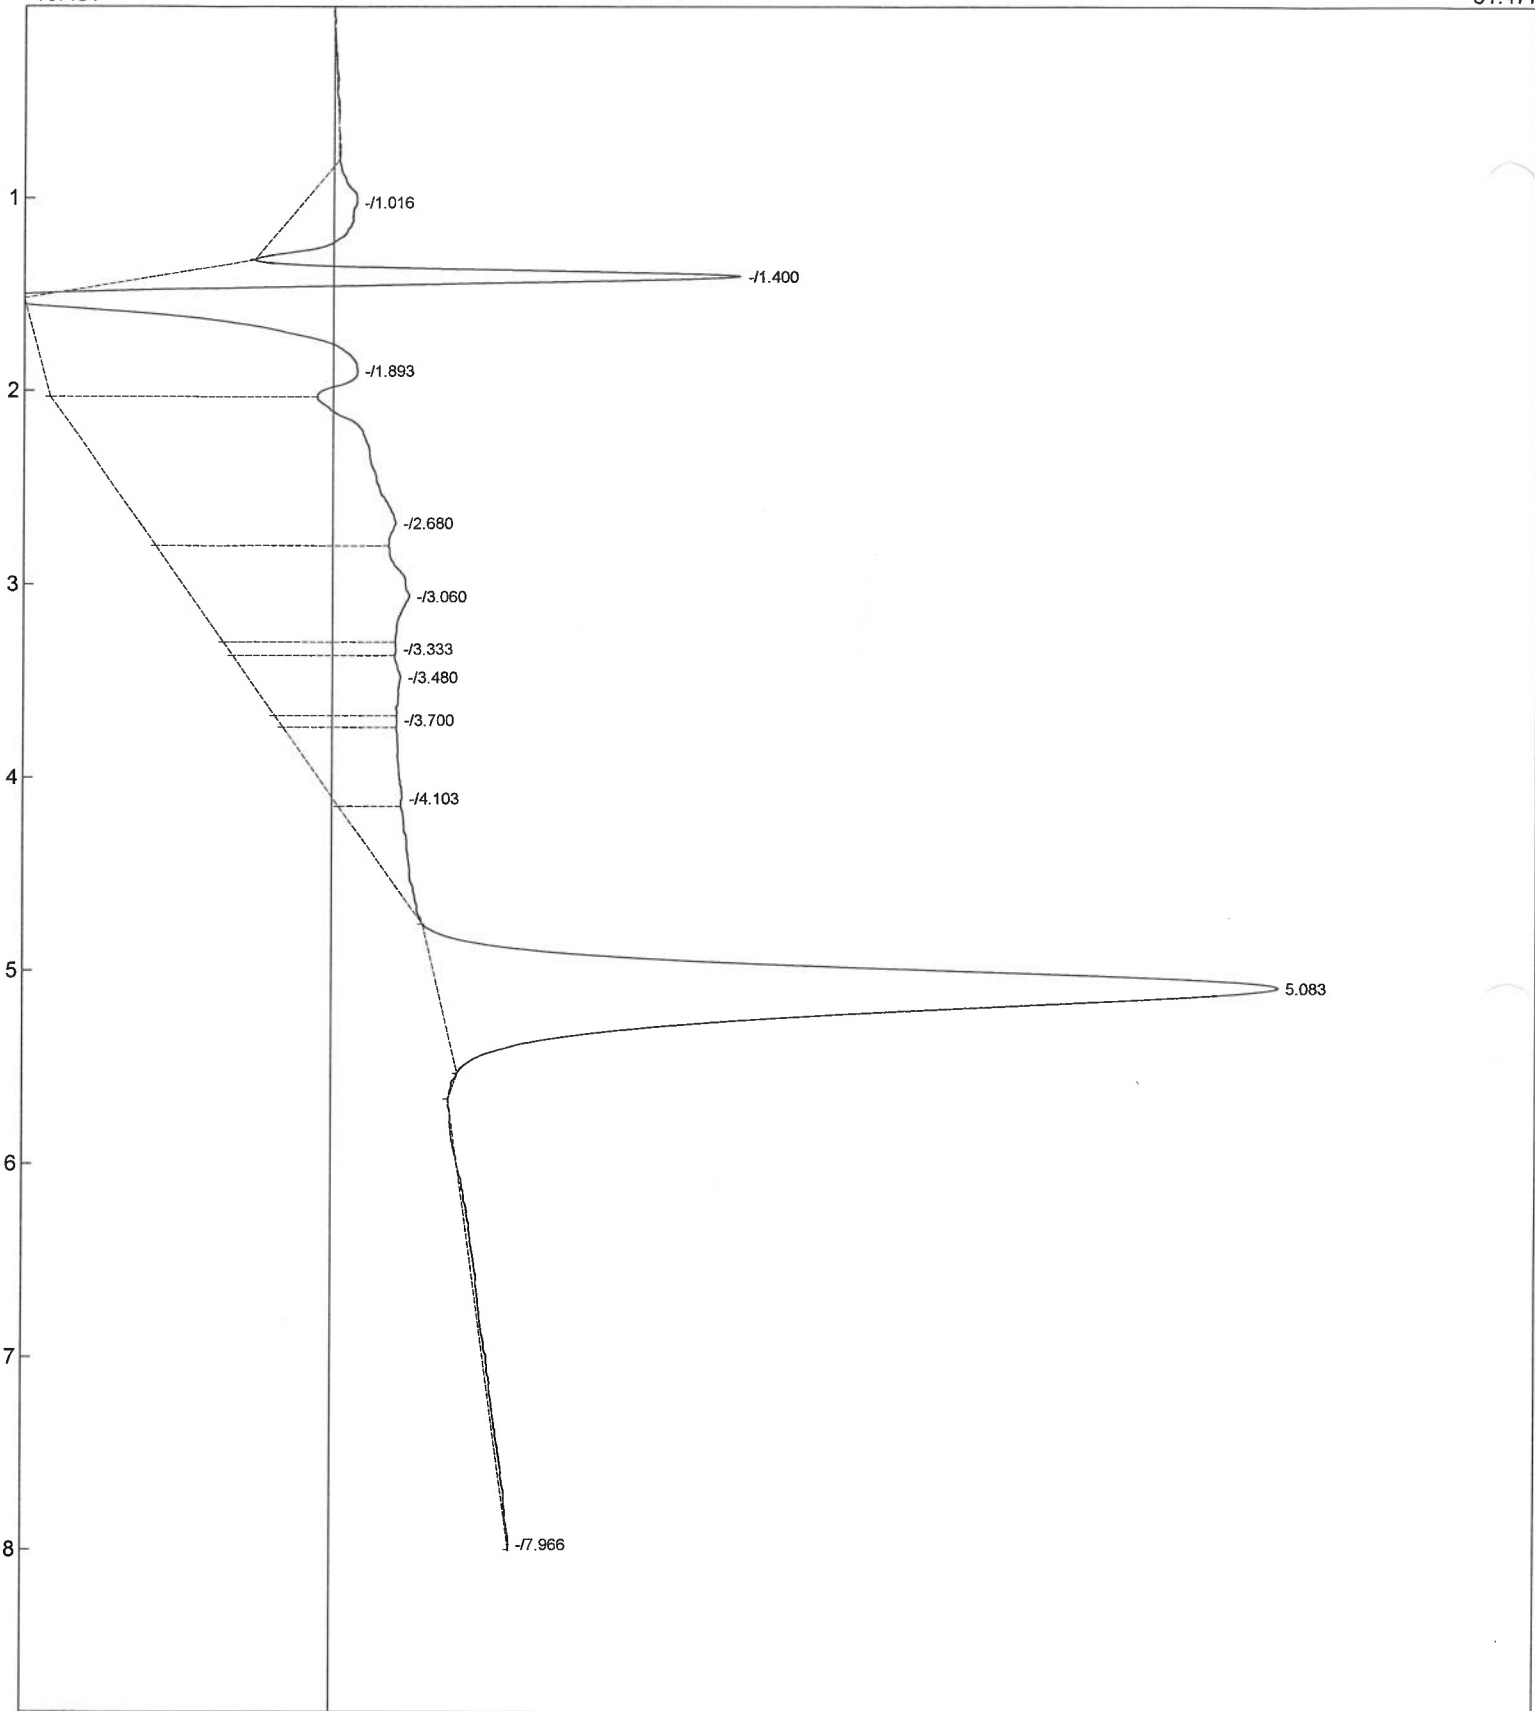

| Component | Retention | Area     | External | Units |
|-----------|-----------|----------|----------|-------|
|           | 5.083     | 569.5966 | 0.0000   |       |
|           |           | 569.5966 | 0.0000   |       |

11PM  
7/18/18



Lab name: RWU SCN Project

Client:

Client ID:

Analysis date: 08/06/2018 12:42:11

Method: Autosampler

Description: UV-Detector 220nm

Column: C30-UG-5 02021868-mx

Carrier: NaSO4 350mM 8/1

Integration: Peak sens=90.0 Base sens=40.0 Min area= 0.50 Standard= 1.000 Sample= 1.000 Tangents=off

Data file: SCN\_Calibration\_08062018\_07.ASC ()

Sample:

Comments: TYPE YOUR COMMENTS HERE

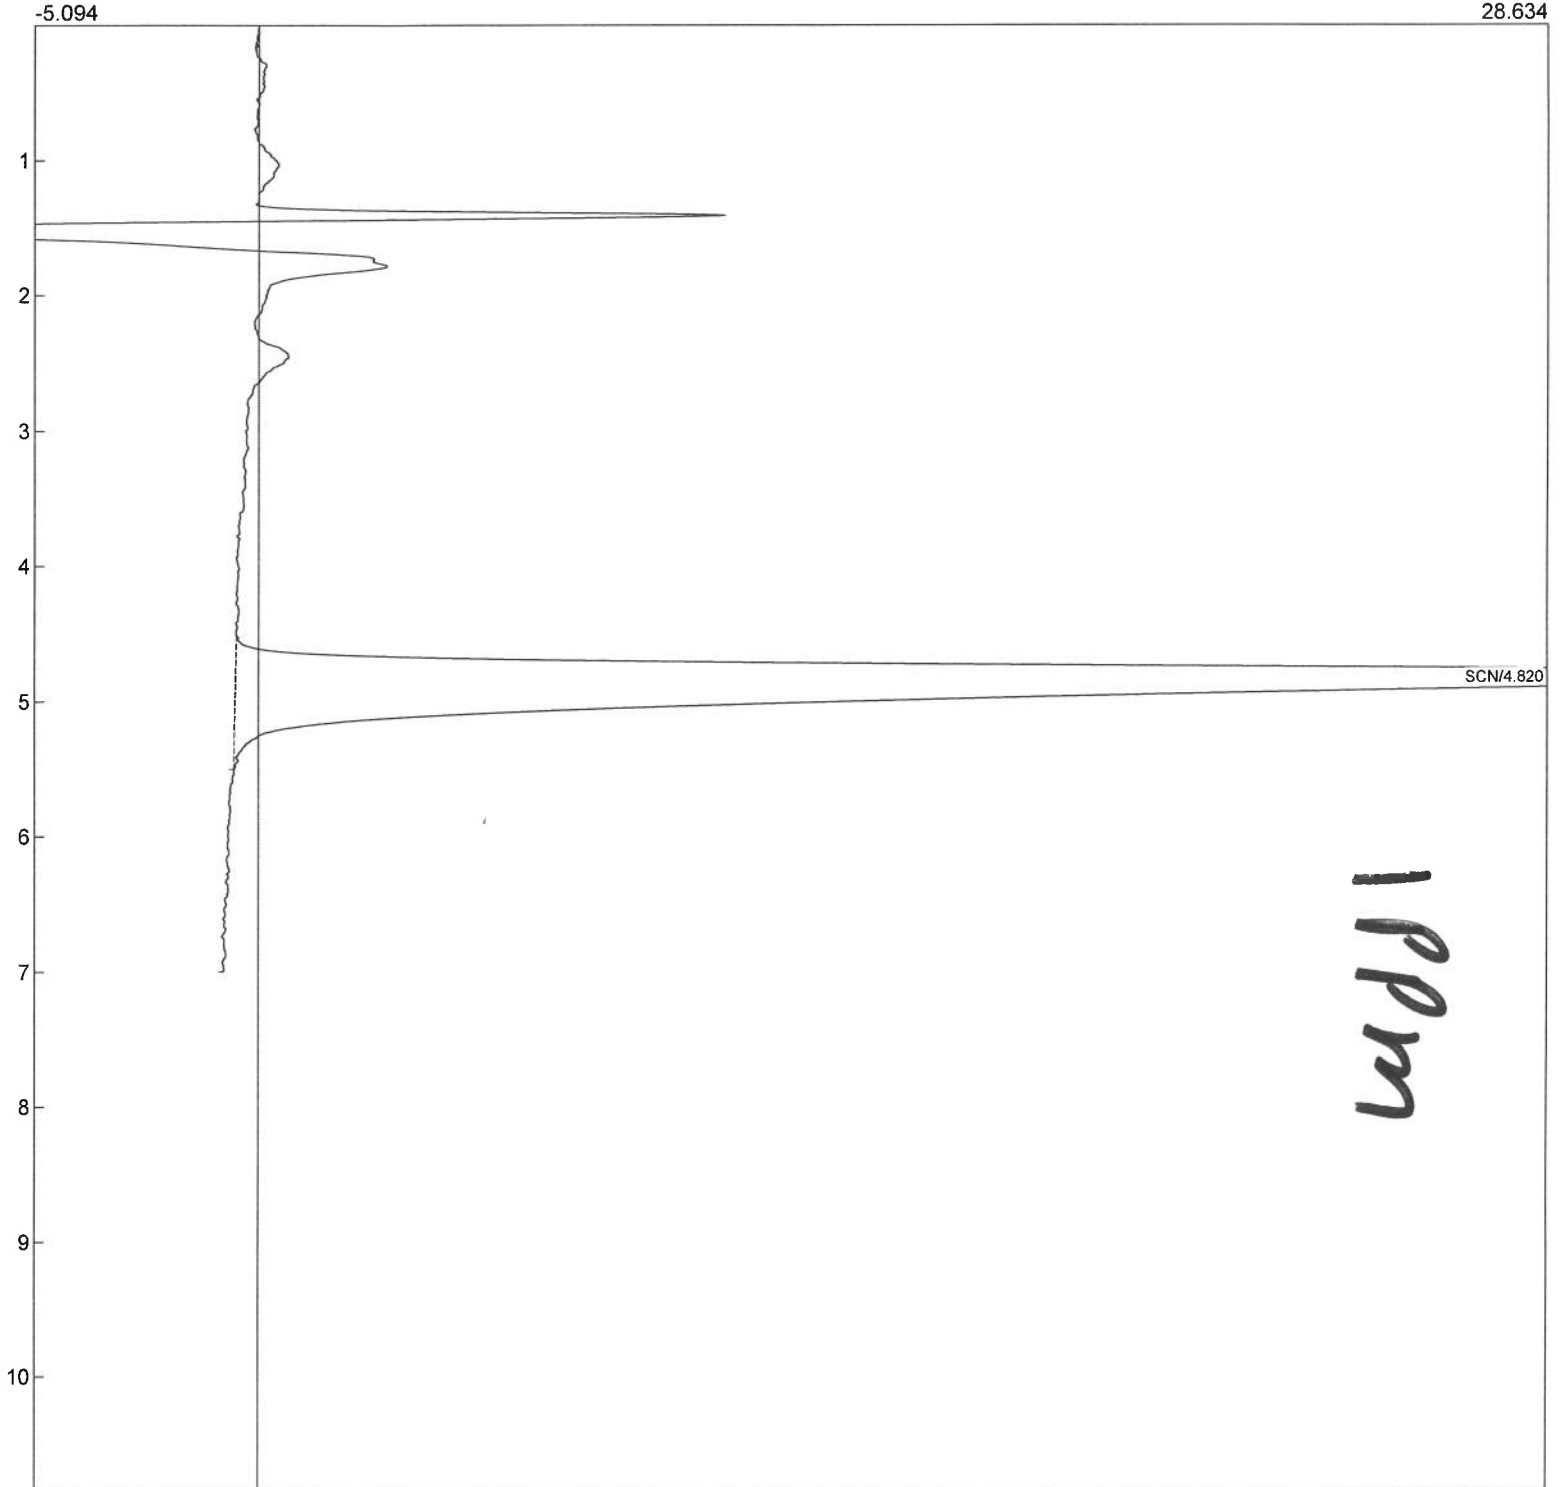

| Component | Retention | Area | External | Units |
|-----------|-----------|------|----------|-------|
|-----------|-----------|------|----------|-------|

|     |       |          |          |  |
|-----|-------|----------|----------|--|
| SCN | 4.820 | 587.4732 | 870.6781 |  |
|-----|-------|----------|----------|--|

|  |  |          |          |  |
|--|--|----------|----------|--|
|  |  | 587.4732 | 870.6781 |  |
|--|--|----------|----------|--|

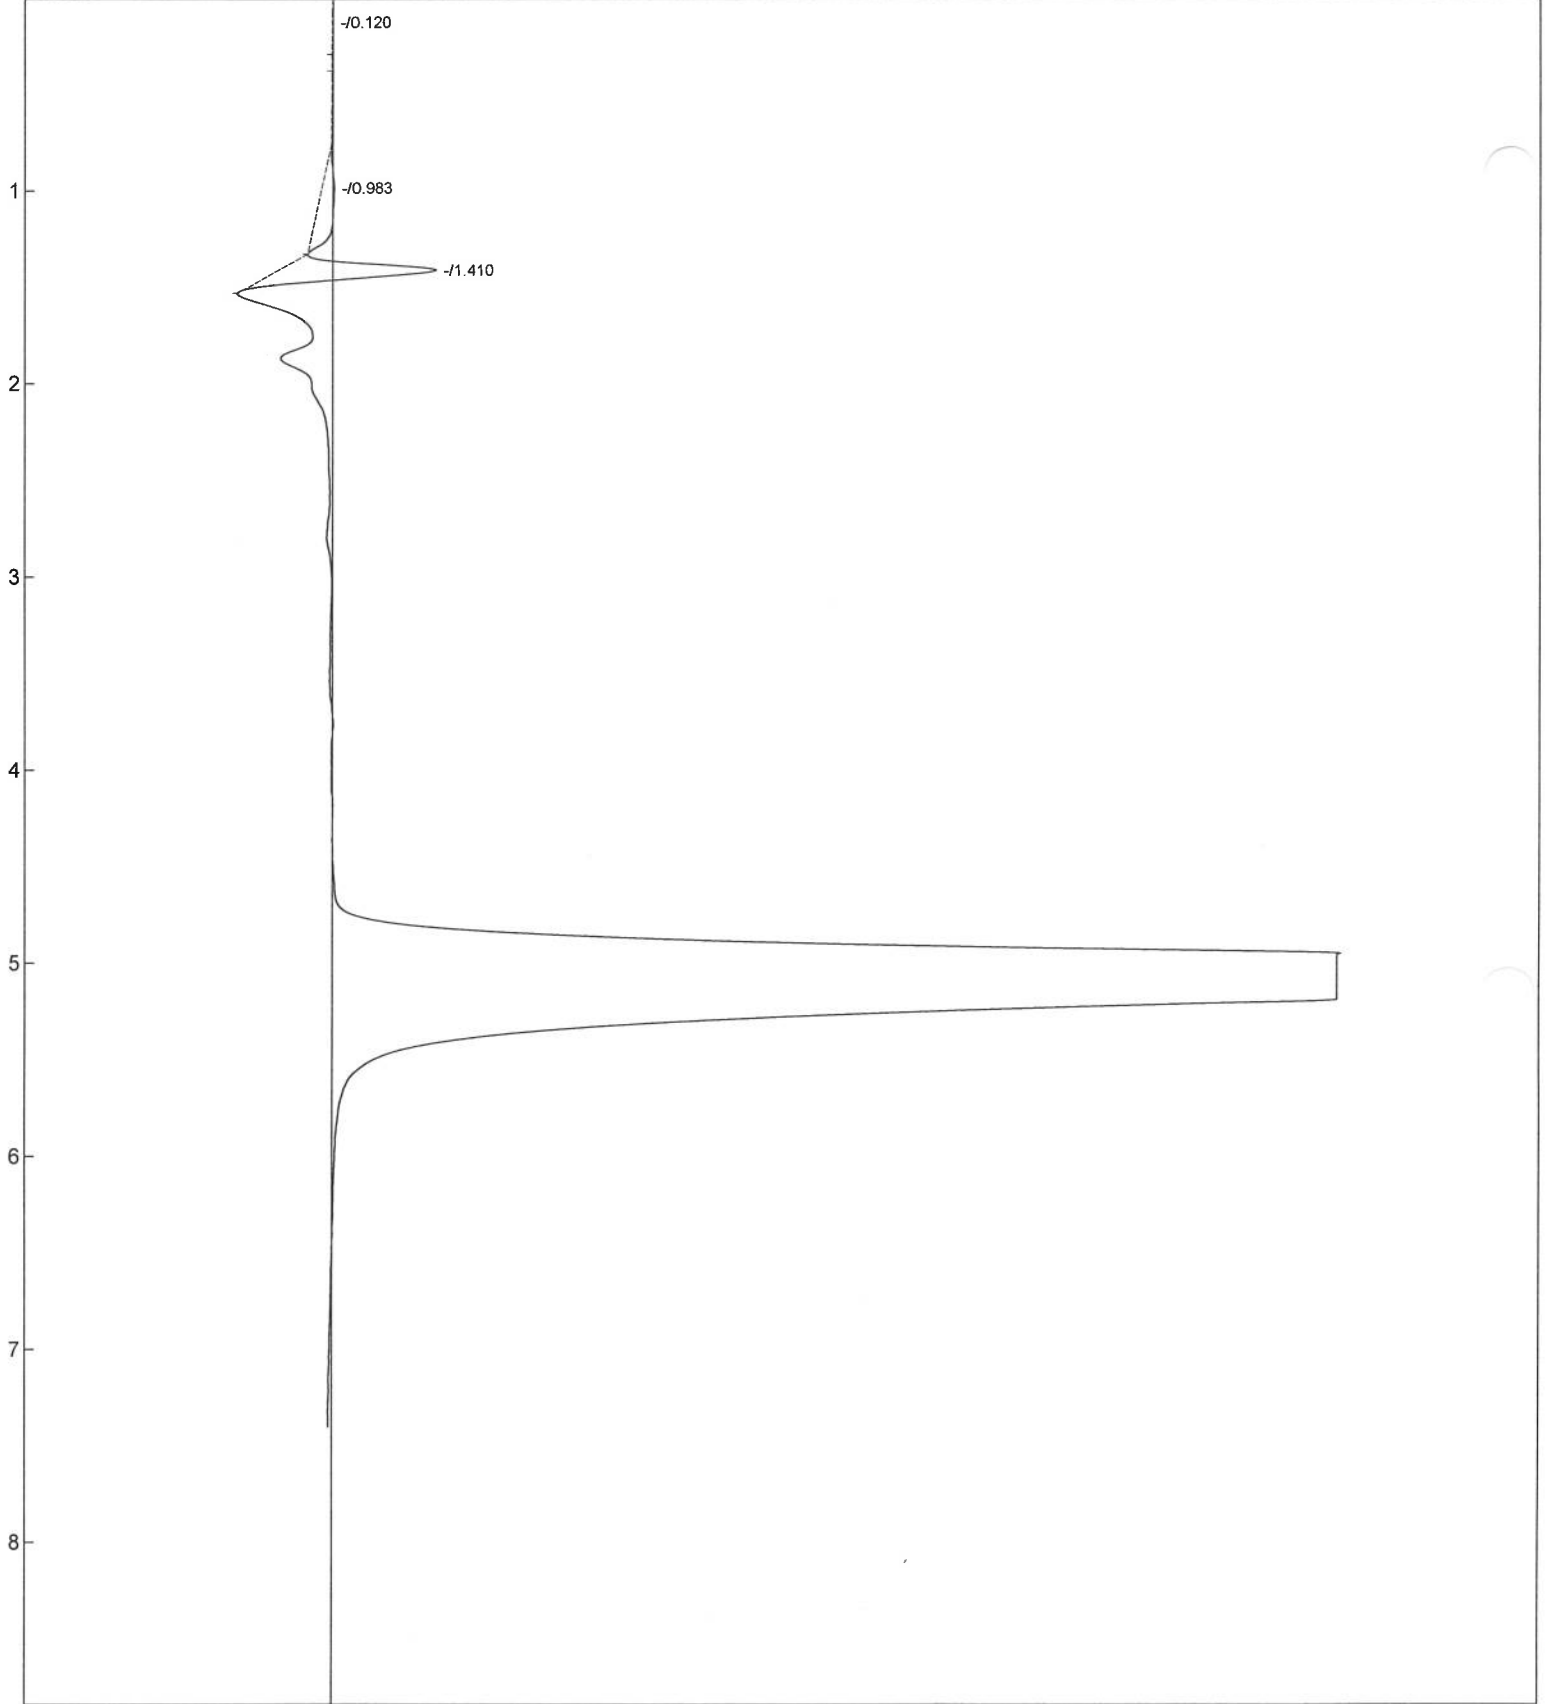

| Component | Retention | Area   | External | Units |
|-----------|-----------|--------|----------|-------|
|           | 0.000     | 0.0000 | 0.0000   |       |
|           |           | 0.0000 | 0.0000   |       |

10 ppm  
7/18/18

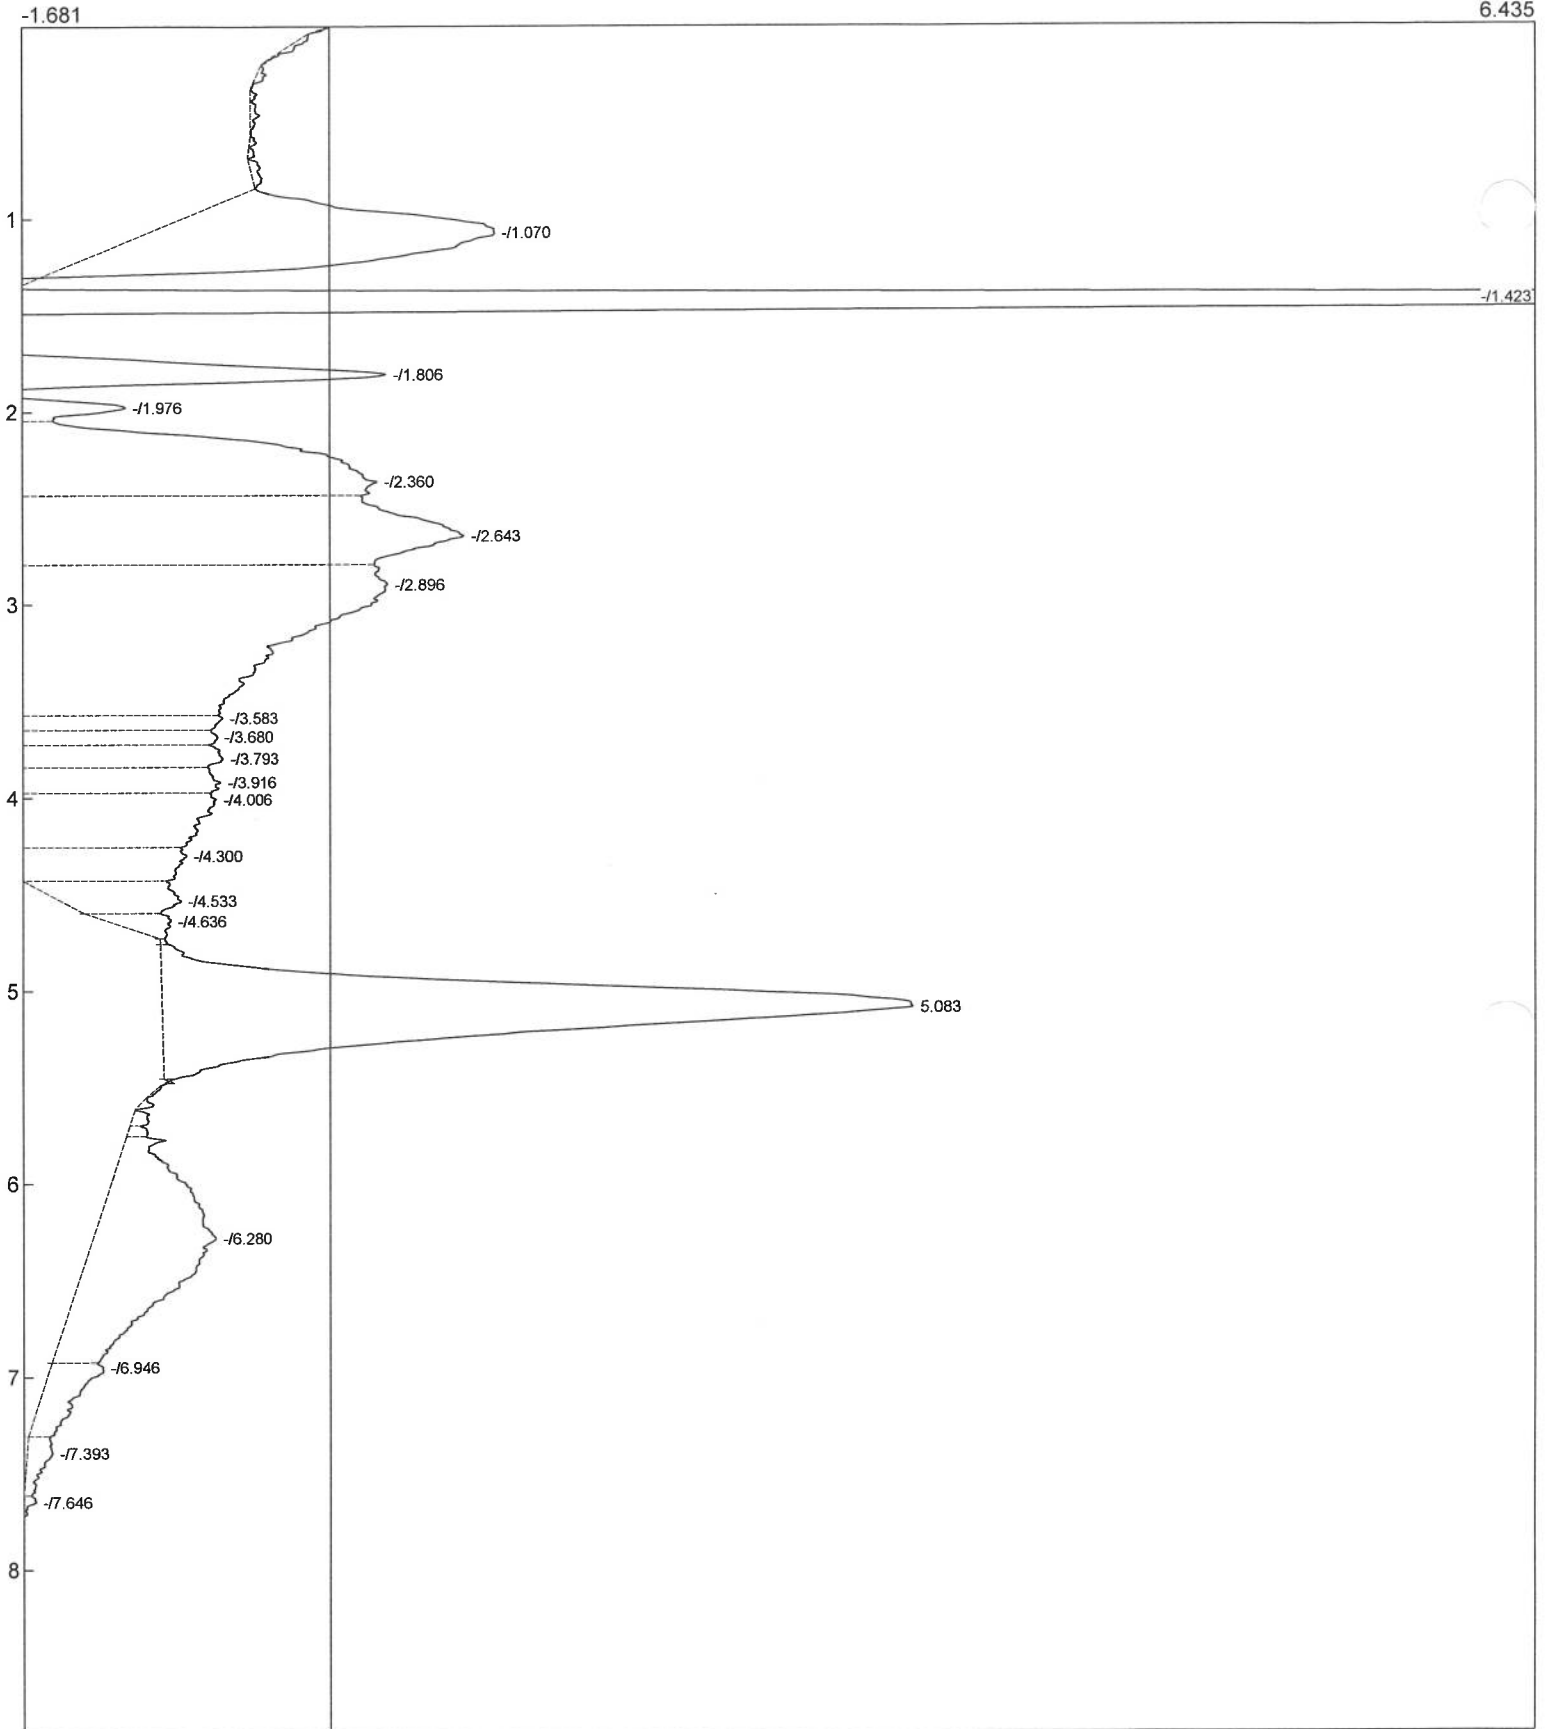

| Component | Retention | Area    | External Units |
|-----------|-----------|---------|----------------|
|           | 5.083     | 66.9300 | 0.0000         |
|           |           | 66.9300 | 0.0000         |

100996  
7/18/18

Lab name: RWU SCN Project  
 Client:  
 Client ID:  
 Analysis date: 08/02/2018 13:49:30  
 Method: Autosampler  
 Description: UV-Detector 220nm  
 Column: C30-UG-5 02021868-mx  
 Carrier: NaSO4 350mM 8/1  
 Integration: Peak sens=90.0 Base sens=40.0 Min area= 0.50 Standard= 1.000 Sample= 1.000 Tangents=off  
 Data file: SCN\_Standard\_Calibration\_08022018\_14.ASC ()  
 Sample:  
 Comments: TYPE YOUR COMMENTS HERE

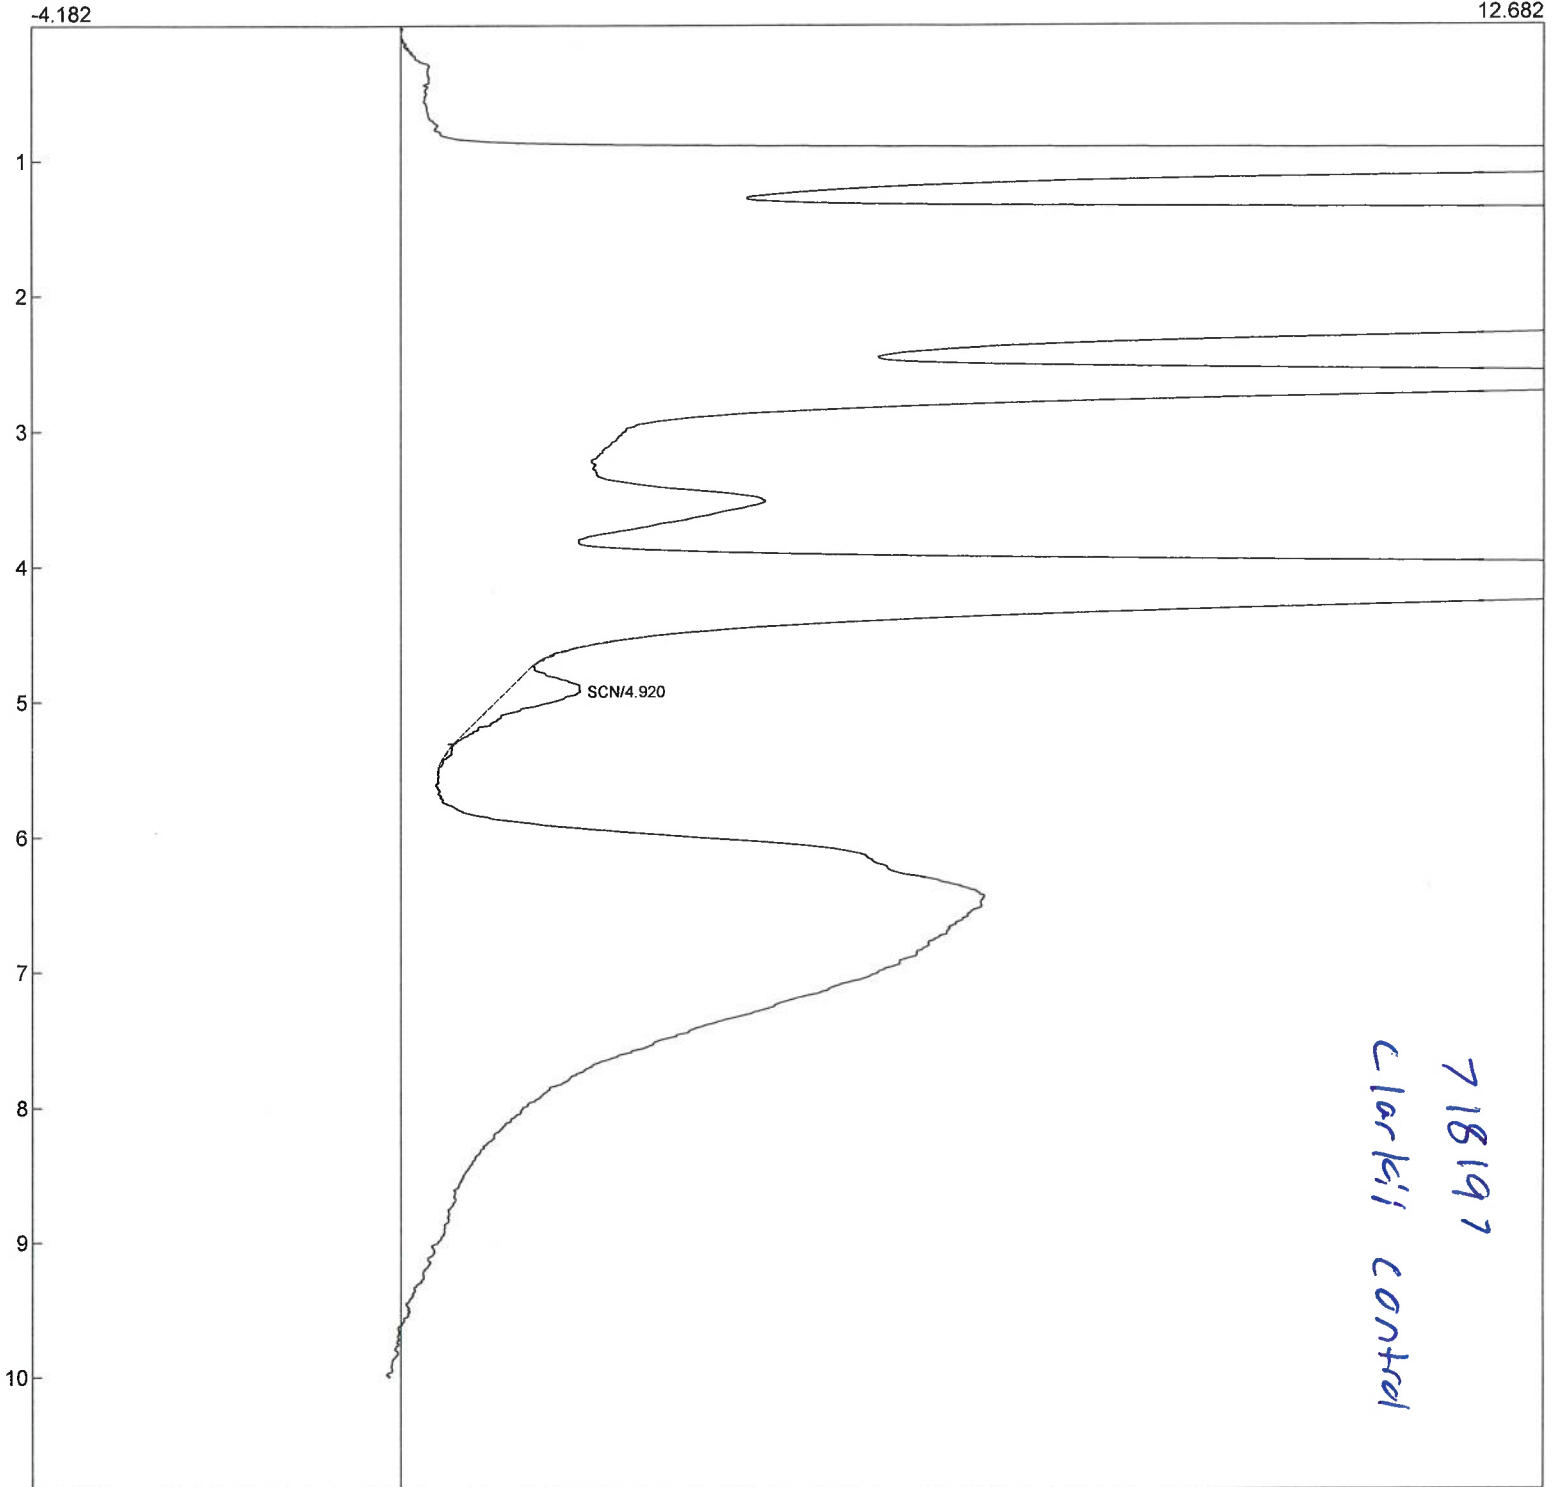

| Component | Retention | Area    | External | Units |
|-----------|-----------|---------|----------|-------|
| SCN       | 4.920     | 12.4699 | 0.0000   |       |
|           |           | 12.4699 | 0.0000   |       |

Lab name: RWU SCN Project

Client:

Client ID:

Analysis date: 08/02/2018 14:00:43

Method: Autosampler

Description: UV-Detector 220nm

Column: C30-UG-5 02021868-mx

Carrier: NaSO4 350mM 8/1

Integration: Peak sens=90.0 Base sens=40.0 Min area= 0.50 Standard= 1.000 Sample= 1.000 Tangents=off

Data file: SCN\_Standard\_Calibration\_08022018\_15.ASC ()

Sample:

Comments: TYPE YOUR COMMENTS HERE

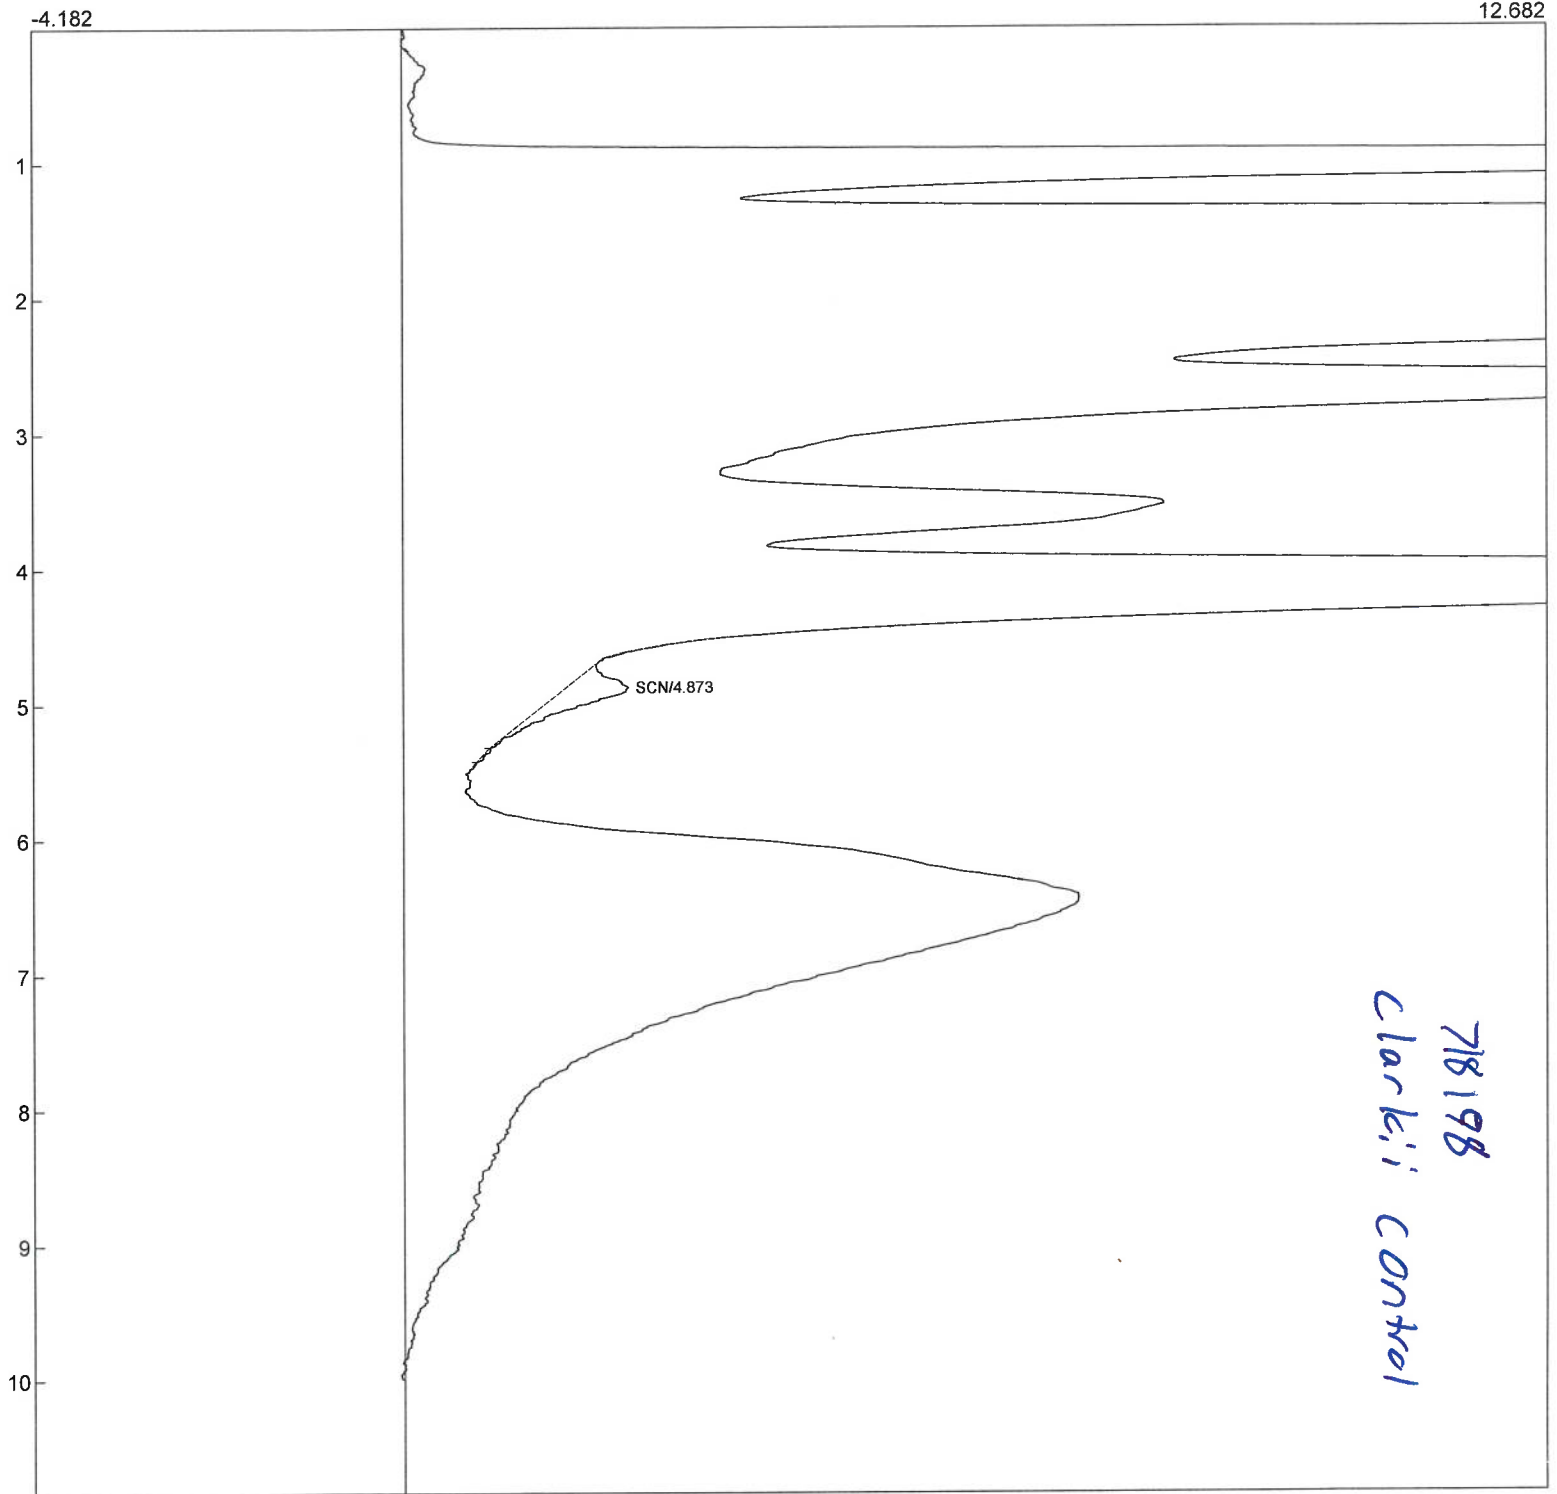

| Component | Retention | Area    | External | Units |
|-----------|-----------|---------|----------|-------|
| SCN       | 4.873     | 10.7934 | 0.0000   |       |
|           |           | 10.7934 | 0.0000   |       |

Lab name: RWU SCN Project  
 Client:  
 Client ID:  
 Analysis date: 08/02/2018 14:11:57  
 Method: Autosampler  
 Description: UV-Detector 220nm  
 Column: C30-UG-5 02021868-mx  
 Carrier: NaSO4 350mM 8/1  
 Integration: Peak sens=90.0 Base sens=40.0 Min area= 0.50 Standard= 1.000 Sample= 1.000 Tangents=off  
 Data file: SCN\_Standard\_Calibration\_08022018\_16.ASC ()  
 Sample:  
 Comments: TYPE YOUR COMMENTS HERE

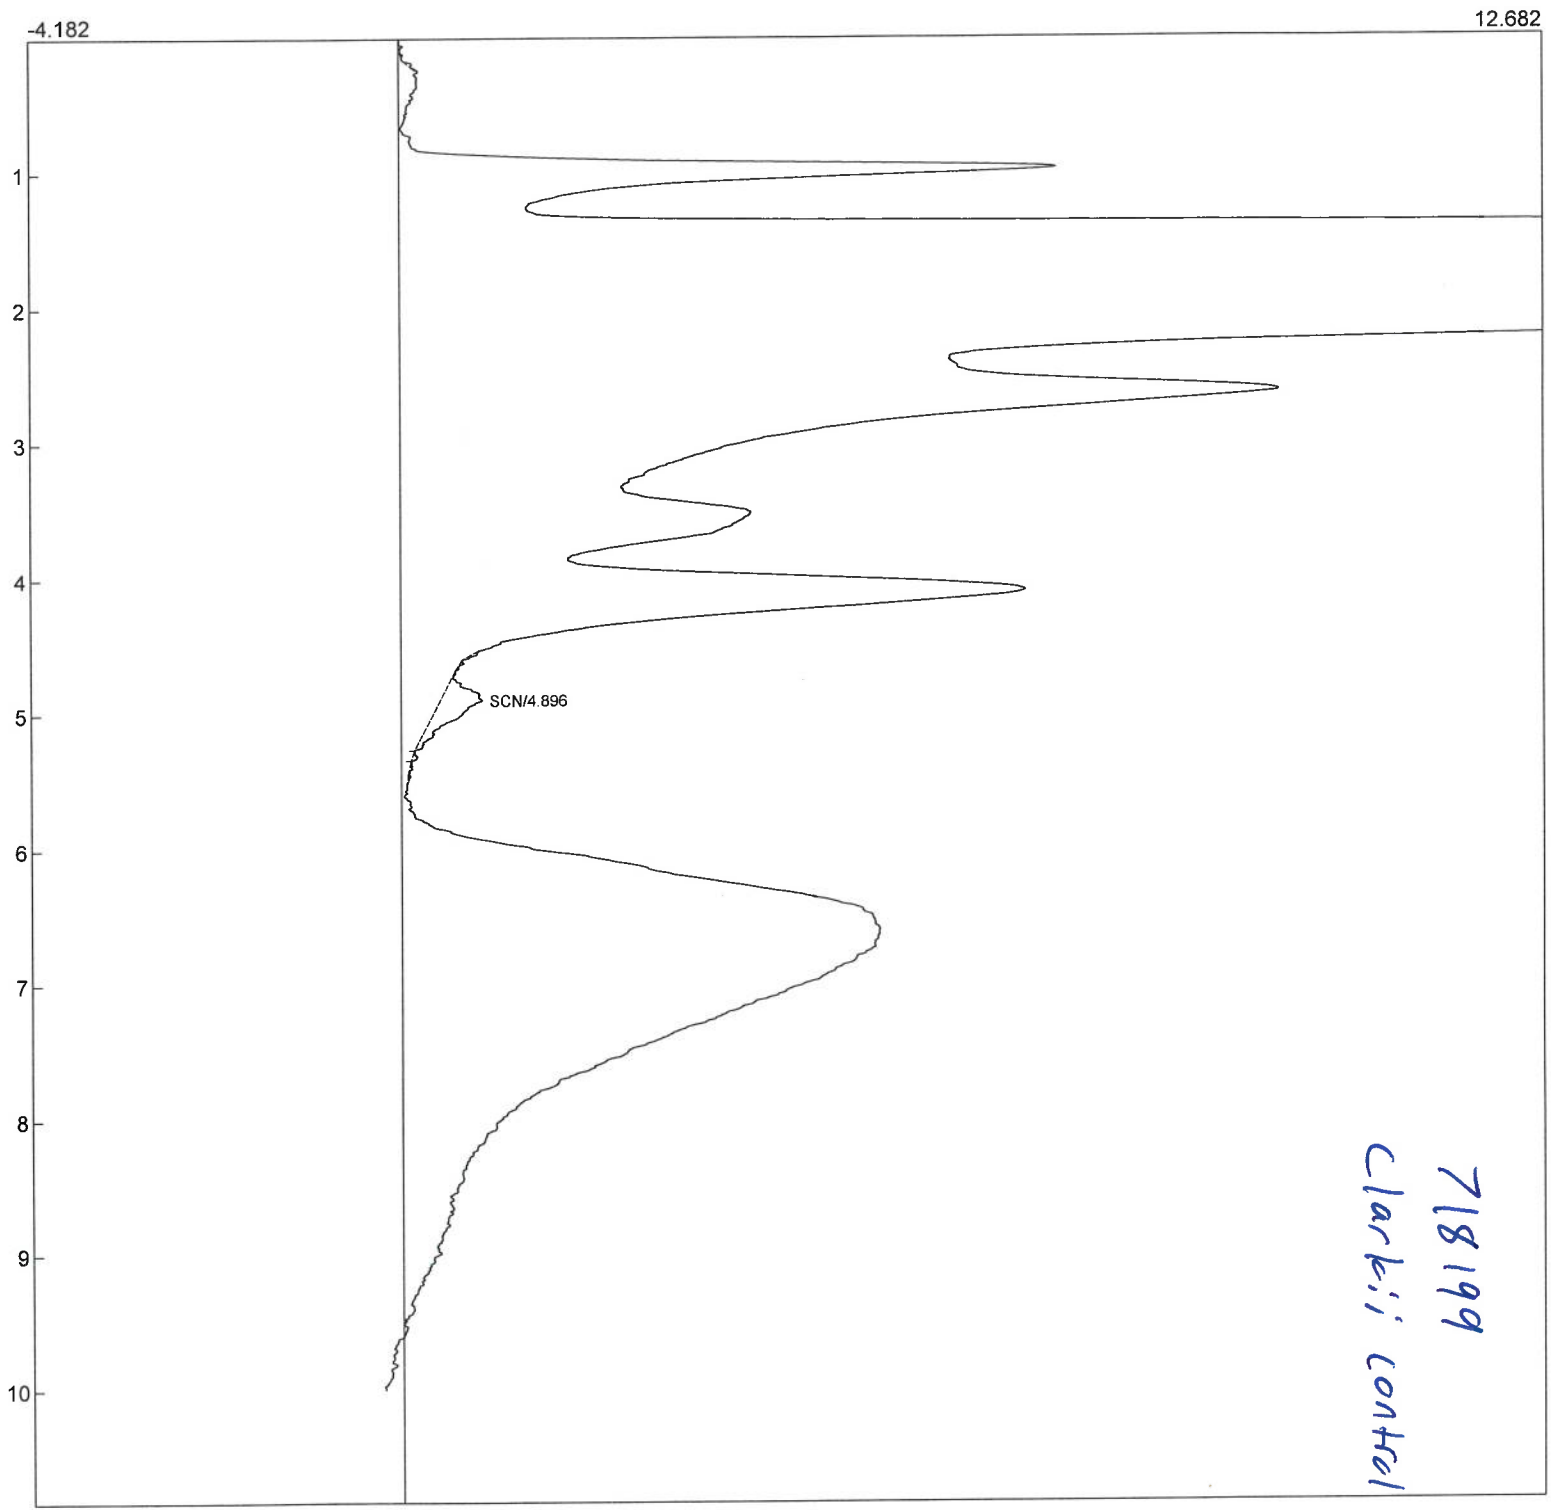

| Component | Retention | Area   | External | Units |
|-----------|-----------|--------|----------|-------|
| SCN       | 4.896     | 7.1888 | 0.0000   |       |
|           |           | 7.1888 | 0.0000   |       |

Lab name: RWU SCN Project  
 Client:  
 Client ID:  
 Analysis date: 08/02/2018 14:23:10  
 Method: Autosampler  
 Description: UV-Detector 220nm  
 Column: C30-UG-5 02021868-mx  
 Carrier: NaSO4 350mM 8/1  
 Integration: Peak sens=90.0 Base sens=40.0 Min area= 0.50 Standard= 1.000 Sample= 1.000 Tangents=off  
 Data file: SCN\_Standard\_Calibration\_08022018\_17.ASC ()  
 Sample:  
 Comments: TYPE YOUR COMMENTS HERE

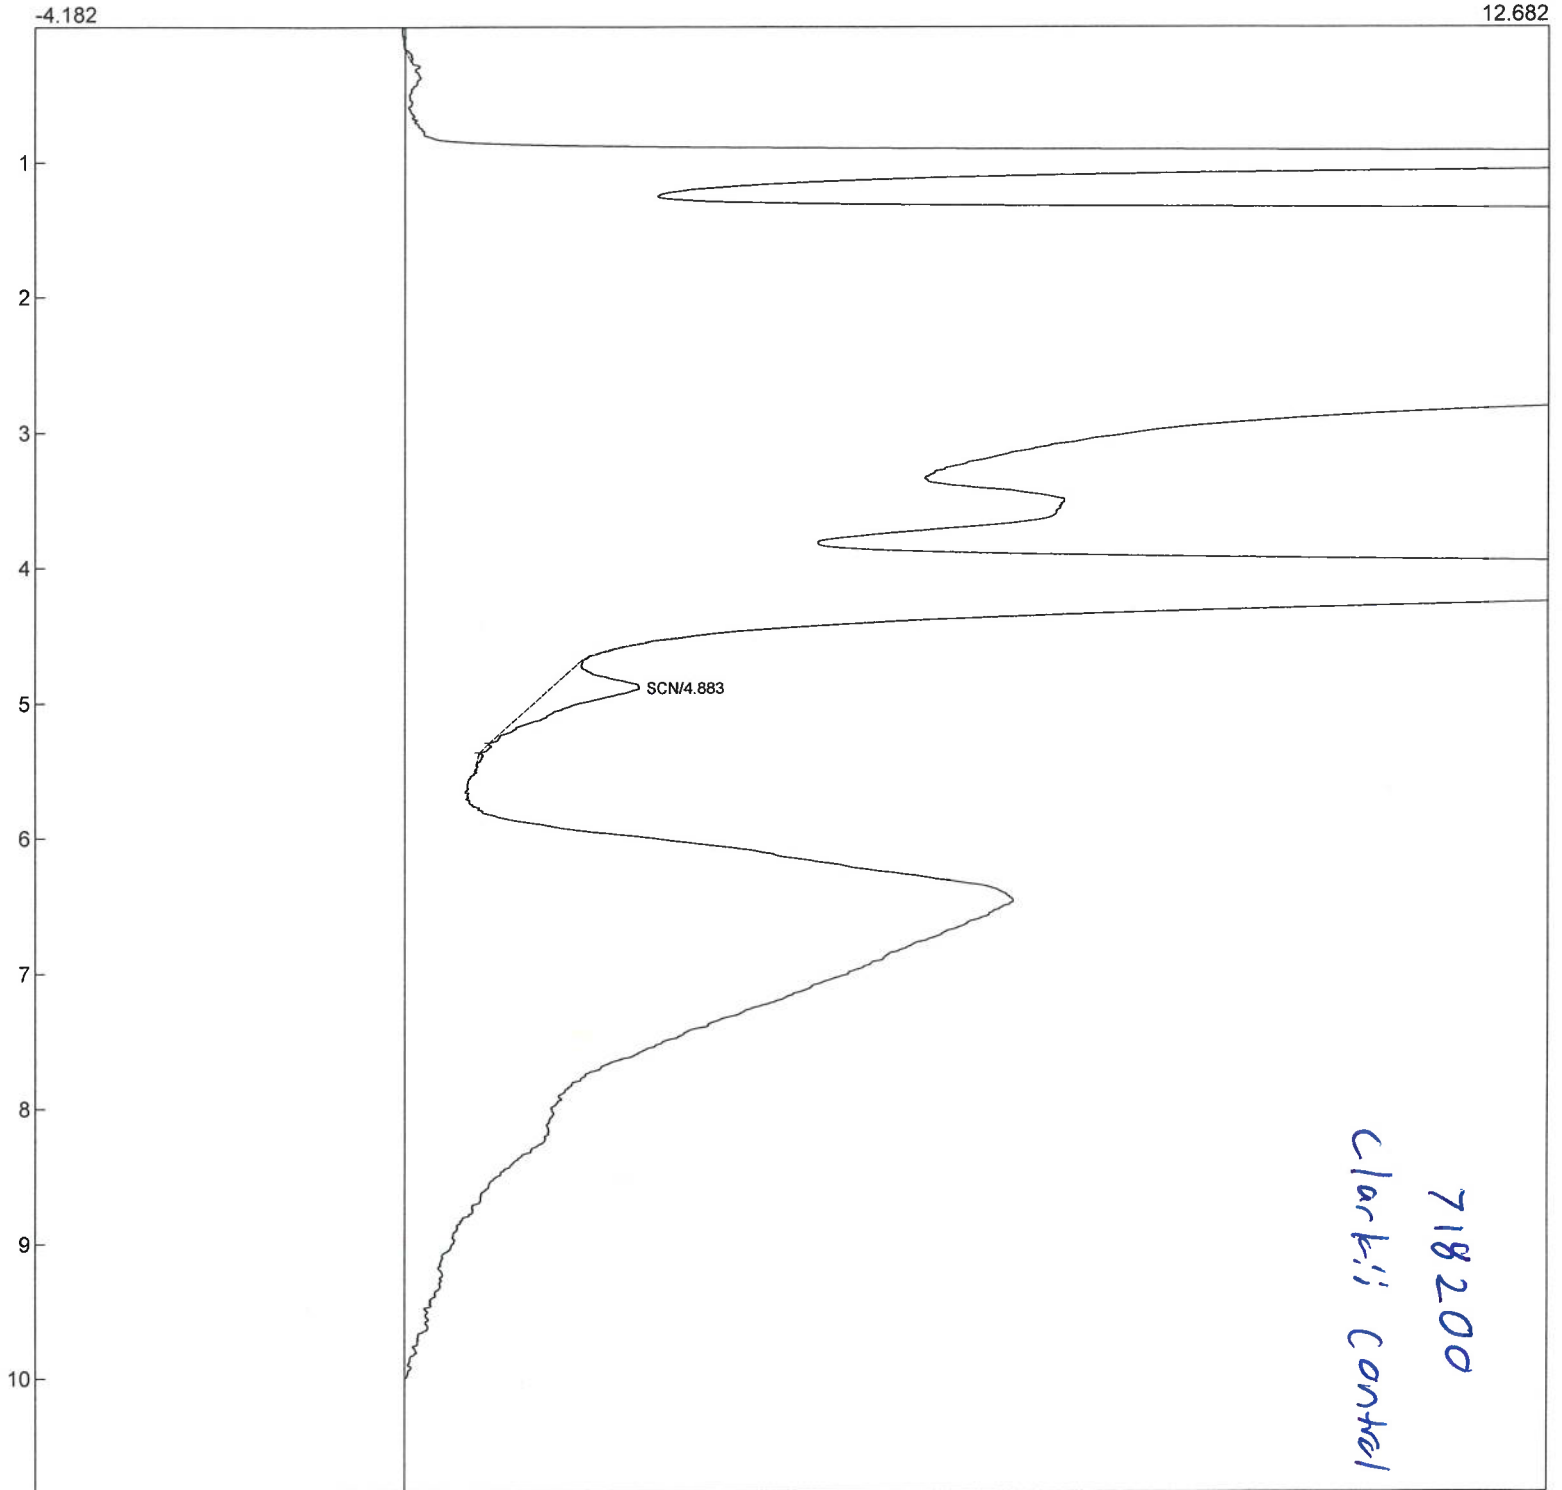

| Component | Retention | Area    | External | Units |
|-----------|-----------|---------|----------|-------|
| SCN       | 4.883     | 14.2421 | 0.0000   |       |
|           |           | 14.2421 | 0.0000   |       |
