# Supplementary material for: The determination of thiocyanate in the blood plasma and holding water of Amphiprion clarkii after exposure to cyanide
Source: PeerJ. 2021 Dec 7;9:e12409. doi: 10.7717/peerj.12409 (PMC8663612; doi:10.7717/peerj.12409)
Supplement: Supplemental Information 3 [file peerj-09-12409-s003.xlsx]

## Sheet: All Samples
Batch Order	Status	Filename	Group	Sample Type	Level	Sample ID	Sample Name	Comments	ColumnHeader1	ColumnHeader2	ColumnHeader3	ColumnHeader4	ColumnHeader5	ColumnHeader6	Compound	Peak Label	Type	Height	Area	RT	Actual RT	RT Delta	Formula	Adduct	Calculated Amt	Theoretical Amt	Sample Amt	Std Add Amount	m/z (Expected)	m/z (Apex)	m/z (Delta)	Response Ratio	ISTD Amt	ISTD Response	Integration Mode	Active	Excluded	%Diff	%RSD	% CV	Channel	Final Units	PK	IR	IP	LS	FI	Confirm	Isotopic Pattern Score (%)
1	Processed	190419-001_20190423084611_20190423090958		Unknown		322									SCN-Bimane	T1	Target Compound	570	1417	2.23	2.26	0.03		M+	23.855	N/A	23.855	N/A	111	111	.000 (mmu)	1.068	1	1326	Method	True	False	N/A	N/A	N/A			Pass	Pass	N/A	N/A	N/A	Confirmed	N/A
1	Processed	190419-001_20190423084611_20190423090958		Unknown		322									SCN-Bimane	T1C1	Target Compound	311	648	2.26	2.25	0.01		M+	N/A	N/A	N/A	N/A	124.1	124.1	-.002 (mmu)	1.068	N/A	N/A	Method	True	False	N/A	N/A	N/A			Pass	Pass	N/A	N/A	N/A	Confirmed	N/A
1	Processed	190419-001_20190423084611_20190423090958		Unknown		322									SCN-Bimane IS	T1	Internal Standard	471	1326	2.24	2.25	0.01		M+	1	1	1	N/A	111	111	.000 (mmu)	N/A	N/A	N/A	Method	True	False	N/A	N/A	N/A			Pass	Pass	N/A	N/A	N/A	Confirmed	N/A
1	Processed	190419-001_20190423084611_20190423090958		Unknown		322									SCN-Bimane IS	T1C1	Internal Standard	215	526	2.25	2.26	0.00		M+	N/A	N/A	N/A	N/A	126.1	126.1	-.002 (mmu)	N/A	N/A	N/A	Method	True	False	N/A	N/A	N/A			Pass	Pass	N/A	N/A	N/A	Confirmed	N/A
2	Processed	190419-002_20190423083816		Unknown		321									SCN-Bimane	T1	Target Compound	919	2490	2.23	2.26	0.03		M+	26.967	N/A	26.967	N/A	111	111	.000 (mmu)	1.191	1	2090	Method	True	False	N/A	N/A	N/A			Pass	Pass	N/A	N/A	N/A	Confirmed	N/A
2	Processed	190419-002_20190423083816		Unknown		321									SCN-Bimane	T1C1	Target Compound	372	1066	2.26	2.26	0.00		M+	N/A	N/A	N/A	N/A	124.1	124.1	-.002 (mmu)	1.191	N/A	N/A	Method	True	False	N/A	N/A	N/A			Pass	Pass	N/A	N/A	N/A	Confirmed	N/A
2	Processed	190419-002_20190423083816		Unknown		321									SCN-Bimane IS	T1	Internal Standard	707	2090	2.24	2.27	0.03		M+	1	1	1	N/A	111	111	.000 (mmu)	N/A	N/A	N/A	Method	True	False	N/A	N/A	N/A			Pass	Pass	N/A	N/A	N/A	Confirmed	N/A
2	Processed	190419-002_20190423083816		Unknown		321									SCN-Bimane IS	T1C1	Internal Standard	438	1016	2.27	2.27	0.00		M+	N/A	N/A	N/A	N/A	126.1	126.1	-.002 (mmu)	N/A	N/A	N/A	Method	True	False	N/A	N/A	N/A			Pass	Pass	N/A	N/A	N/A	Confirmed	N/A
3	Processed	190419-003		Unknown		324									SCN-Bimane	T1	Target Compound	1979	5049	2.23	2.21	-0.02		M+	16.726	N/A	16.726	N/A	111	111	.000 (mmu)	0.787	1	6416	Method	True	False	N/A	N/A	N/A			Pass	Pass	N/A	N/A	N/A	Confirmed	N/A
3	Processed	190419-003		Unknown		324									SCN-Bimane	T1C1	Target Compound	871	2352	2.21	2.21	0.00		M+	N/A	N/A	N/A	N/A	124.1	124.1	-.002 (mmu)	0.787	N/A	N/A	Method	True	False	N/A	N/A	N/A			Pass	Pass	N/A	N/A	N/A	Confirmed	N/A
3	Processed	190419-003		Unknown		324									SCN-Bimane IS	T1	Internal Standard	2229	6416	2.24	2.21	-0.03		M+	1	1	1	N/A	111	111	.000 (mmu)	N/A	N/A	N/A	Method	True	False	N/A	N/A	N/A			Pass	Pass	N/A	N/A	N/A	Confirmed	N/A
3	Processed	190419-003		Unknown		324									SCN-Bimane IS	T1C1	Internal Standard	1183	3064	2.21	2.21	-0.01		M+	N/A	N/A	N/A	N/A	126.1	126.1	-.002 (mmu)	N/A	N/A	N/A	Method	True	False	N/A	N/A	N/A			Pass	Pass	N/A	N/A	N/A	Confirmed	N/A
4	Processed	190419-004		Unknown		320									SCN-Bimane	T1	Target Compound	2387	6372	2.23	2.21	-0.02		M+	19.39	N/A	19.39	N/A	111	111	.000 (mmu)	0.892	1	7143	Method	True	False	N/A	N/A	N/A			Pass	Pass	N/A	N/A	N/A	Confirmed	N/A
4	Processed	190419-004		Unknown		320									SCN-Bimane	T1C1	Target Compound	1186	2823	2.21	2.21	0.00		M+	N/A	N/A	N/A	N/A	124.1	124.1	-.002 (mmu)	0.892	N/A	N/A	Method	True	False	N/A	N/A	N/A			Pass	Pass	N/A	N/A	N/A	Confirmed	N/A
4	Processed	190419-004		Unknown		320									SCN-Bimane IS	T1	Internal Standard	2685	7143	2.24	2.21	-0.03		M+	1	1	1	N/A	111	111	.000 (mmu)	N/A	N/A	N/A	Method	True	False	N/A	N/A	N/A			Pass	Pass	N/A	N/A	N/A	Confirmed	N/A
4	Processed	190419-004		Unknown		320									SCN-Bimane IS	T1C1	Internal Standard	1238	3138	2.21	2.22	-0.01		M+	N/A	N/A	N/A	N/A	126.1	126.1	-.002 (mmu)	N/A	N/A	N/A	Method	True	False	N/A	N/A	N/A			Pass	Pass	N/A	N/A	N/A	Confirmed	N/A
5	Processed	190419-005		Unknown		325									SCN-Bimane	T1	Target Compound	1155	2779	2.23	2.22	-0.01		M+	9.679	N/A	9.679	N/A	111	111	.000 (mmu)	0.509	1	5464	Method	True	False	N/A	N/A	N/A			Pass	Pass	N/A	N/A	N/A	Confirmed	N/A
5	Processed	190419-005		Unknown		325									SCN-Bimane	T1C1	Target Compound	469	1239	2.22	2.22	0.00		M+	N/A	N/A	N/A	N/A	124.1	124.1	-.002 (mmu)	0.509	N/A	N/A	Method	True	False	N/A	N/A	N/A			Pass	Pass	N/A	N/A	N/A	Confirmed	N/A
5	Processed	190419-005		Unknown		325									SCN-Bimane IS	T1	Internal Standard	1905	5464	2.24	2.21	-0.03		M+	1	1	1	N/A	111	111	.000 (mmu)	N/A	N/A	N/A	Method	True	False	N/A	N/A	N/A			Pass	Pass	N/A	N/A	N/A	Confirmed	N/A
5	Processed	190419-005		Unknown		325									SCN-Bimane IS	T1C1	Internal Standard	1058	2772	2.21	2.21	0.00		M+	N/A	N/A	N/A	N/A	126.1	126.1	-.002 (mmu)	N/A	N/A	N/A	Method	True	False	N/A	N/A	N/A			Pass	Pass	N/A	N/A	N/A	Confirmed	N/A
6	Processed	190419-006		Unknown		319									SCN-Bimane	T1	Target Compound	5503	15237	2.23	2.22	-0.01		M+	61.525	N/A	61.525	N/A	111	111	.000 (mmu)	2.556	1	5962	Method	True	False	N/A	N/A	N/A			Pass	Pass	N/A	N/A	N/A	Confirmed	N/A
6	Processed	190419-006		Unknown		319									SCN-Bimane	T1C1	Target Compound	2222	6519	2.22	2.22	0.00		M+	N/A	N/A	N/A	N/A	124.1	124.1	-.002 (mmu)	2.556	N/A	N/A	Method	True	False	N/A	N/A	N/A			Pass	Pass	N/A	N/A	N/A	Confirmed	N/A
6	Processed	190419-006		Unknown		319									SCN-Bimane IS	T1	Internal Standard	2234	5962	2.24	2.21	-0.03		M+	1	1	1	N/A	111	111	.000 (mmu)	N/A	N/A	N/A	Method	True	False	N/A	N/A	N/A			Pass	Pass	N/A	N/A	N/A	Confirmed	N/A
6	Processed	190419-006		Unknown		319									SCN-Bimane IS	T1C1	Internal Standard	1009	2815	2.21	2.21	0.00		M+	N/A	N/A	N/A	N/A	126.1	126.1	-.002 (mmu)	N/A	N/A	N/A	Method	True	False	N/A	N/A	N/A			Pass	Pass	N/A	N/A	N/A	Confirmed	N/A
7	Processed	190419-007		Unknown		313									SCN-Bimane	T1	Target Compound	2702	7461	2.23	2.21	-0.02		M+	27.593	N/A	27.593	N/A	111	111	.000 (mmu)	1.216	1	6135	Method	True	False	N/A	N/A	N/A			Pass	Pass	N/A	N/A	N/A	Confirmed	N/A
7	Processed	190419-007		Unknown		313									SCN-Bimane	T1C1	Target Compound	1228	3479	2.21	2.2	0.01		M+	N/A	N/A	N/A	N/A	124.1	124.1	-.002 (mmu)	1.216	N/A	N/A	Method	True	False	N/A	N/A	N/A			Pass	Pass	N/A	N/A	N/A	Confirmed	N/A
7	Processed	190419-007		Unknown		313									SCN-Bimane IS	T1	Internal Standard	2389	6135	2.24	2.21	-0.03		M+	1	1	1	N/A	111	111	.000 (mmu)	N/A	N/A	N/A	Method	True	False	N/A	N/A	N/A			Pass	Pass	N/A	N/A	N/A	Confirmed	N/A
7	Processed	190419-007		Unknown		313									SCN-Bimane IS	T1C1	Internal Standard	1052	2954	2.21	2.21	0.00		M+	N/A	N/A	N/A	N/A	126.1	126.1	-.002 (mmu)	N/A	N/A	N/A	Method	True	False	N/A	N/A	N/A			Pass	Pass	N/A	N/A	N/A	Confirmed	N/A
8	Processed	190419-008		Unknown		311/312									SCN-Bimane	T1	Target Compound	5996	15853	2.23	2.21	-0.02		M+	66.27	N/A	66.27	N/A	111	111	.000 (mmu)	2.743	1	5779	Method	True	False	N/A	N/A	N/A			Pass	Pass	N/A	N/A	N/A	Confirmed	N/A
8	Processed	190419-008		Unknown		311/312									SCN-Bimane	T1C1	Target Compound	2733	7493	2.21	2.21	0.00		M+	N/A	N/A	N/A	N/A	124.1	124.1	-.002 (mmu)	2.743	N/A	N/A	Method	True	False	N/A	N/A	N/A			Pass	Pass	N/A	N/A	N/A	Confirmed	N/A
8	Processed	190419-008		Unknown		311/312									SCN-Bimane IS	T1	Internal Standard	2035	5779	2.24	2.21	-0.03		M+	1	1	1	N/A	111	111	.000 (mmu)	N/A	N/A	N/A	Method	True	False	N/A	N/A	N/A			Pass	Pass	N/A	N/A	N/A	Confirmed	N/A
8	Processed	190419-008		Unknown		311/312									SCN-Bimane IS	T1C1	Internal Standard	951	2534	2.21	2.21	0.00		M+	N/A	N/A	N/A	N/A	126.1	126.1	-.002 (mmu)	N/A	N/A	N/A	Method	True	False	N/A	N/A	N/A			Pass	Pass	N/A	N/A	N/A	Confirmed	N/A
9	Processed	190419-009		Unknown		310									SCN-Bimane	T1	Target Compound	2627	7253	2.23	2.22	-0.01		M+	32.103	N/A	32.103	N/A	111	111	.000 (mmu)	1.394	1	5203	Method	True	False	N/A	N/A	N/A			Pass	Pass	N/A	N/A	N/A	Confirmed	N/A
9	Processed	190419-009		Unknown		310									SCN-Bimane	T1C1	Target Compound	1167	3122	2.22	2.21	0.01		M+	N/A	N/A	N/A	N/A	124.1	124.1	-.002 (mmu)	1.394	N/A	N/A	Method	True	False	N/A	N/A	N/A			Pass	Pass	N/A	N/A	N/A	Confirmed	N/A
9	Processed	190419-009		Unknown		310									SCN-Bimane IS	T1	Internal Standard	1968	5203	2.24	2.21	-0.03		M+	1	1	1	N/A	111	111	.000 (mmu)	N/A	N/A	N/A	Method	True	False	N/A	N/A	N/A			Pass	Pass	N/A	N/A	N/A	Confirmed	N/A
9	Processed	190419-009		Unknown		310									SCN-Bimane IS	T1C1	Internal Standard	965	2540	2.21	2.22	0.00		M+	N/A	N/A	N/A	N/A	126.1	126.1	-.002 (mmu)	N/A	N/A	N/A	Method	True	False	N/A	N/A	N/A			Pass	Pass	N/A	N/A	N/A	Confirmed	N/A
10	Processed	190419-010		Unknown		307									SCN-Bimane	T1	Target Compound	2435	6264	2.23	2.21	-0.02		M+	21.421	N/A	21.421	N/A	111	111	.000 (mmu)	0.972	1	6443	Method	True	False	N/A	N/A	N/A			Pass	Pass	N/A	N/A	N/A	Confirmed	N/A
10	Processed	190419-010		Unknown		307									SCN-Bimane	T1C1	Target Compound	1043	2841	2.21	2.21	0.00		M+	N/A	N/A	N/A	N/A	124.1	124.1	-.002 (mmu)	0.972	N/A	N/A	Method	True	False	N/A	N/A	N/A			Pass	Pass	N/A	N/A	N/A	Confirmed	N/A
10	Processed	190419-010		Unknown		307									SCN-Bimane IS	T1	Internal Standard	2483	6443	2.24	2.21	-0.03		M+	1	1	1	N/A	111	111	.000 (mmu)	N/A	N/A	N/A	Method	True	False	N/A	N/A	N/A			Pass	Pass	N/A	N/A	N/A	Confirmed	N/A
10	Processed	190419-010		Unknown		307									SCN-Bimane IS	T1C1	Internal Standard	1257	3127	2.21	2.21	0.00		M+	N/A	N/A	N/A	N/A	126.1	126.1	-.002 (mmu)	N/A	N/A	N/A	Method	True	False	N/A	N/A	N/A			Pass	Pass	N/A	N/A	N/A	Confirmed	N/A
11	Processed	190419-011		Unknown		306									SCN-Bimane	T1	Target Compound	1582	4393	2.23	2.22	-0.01		M+	26.03	N/A	26.03	N/A	111	111	.000 (mmu)	1.154	1	3806	Method	True	False	N/A	N/A	N/A			Pass	Pass	N/A	N/A	N/A	Confirmed	N/A
11	Processed	190419-011		Unknown		306									SCN-Bimane	T1C1	Target Compound	679	1895	2.22	2.21	0.01		M+	N/A	N/A	N/A	N/A	124.1	124.1	-.002 (mmu)	1.154	N/A	N/A	Method	True	False	N/A	N/A	N/A			Pass	Pass	N/A	N/A	N/A	Confirmed	N/A
11	Processed	190419-011		Unknown		306									SCN-Bimane IS	T1	Internal Standard	1381	3806	2.24	2.22	-0.02		M+	1	1	1	N/A	111	111	.000 (mmu)	N/A	N/A	N/A	Method	True	False	N/A	N/A	N/A			Pass	Pass	N/A	N/A	N/A	Confirmed	N/A
11	Processed	190419-011		Unknown		306									SCN-Bimane IS	T1C1	Internal Standard	691	1954	2.22	2.21	0.01		M+	N/A	N/A	N/A	N/A	126.1	126.1	-.002 (mmu)	N/A	N/A	N/A	Method	True	False	N/A	N/A	N/A			Pass	Pass	N/A	N/A	N/A	Confirmed	N/A
12	Processed	190419-012		Unknown		305									SCN-Bimane	T1	Target Compound	2335	6077	2.23	2.22	-0.01		M+	23.645	N/A	23.645	N/A	111	111	.000 (mmu)	1.06	1	5733	Method	True	False	N/A	N/A	N/A			Pass	Pass	N/A	N/A	N/A	Confirmed	N/A
12	Processed	190419-012		Unknown		305									SCN-Bimane	T1C1	Target Compound	1031	2848	2.22	2.22	-0.01		M+	N/A	N/A	N/A	N/A	124.1	124.1	-.002 (mmu)	1.06	N/A	N/A	Method	True	False	N/A	N/A	N/A			Pass	Pass	N/A	N/A	N/A	Confirmed	N/A
12	Processed	190419-012		Unknown		305									SCN-Bimane IS	T1	Internal Standard	2193	5733	2.24	2.22	-0.02		M+	1	1	1	N/A	111	111	.000 (mmu)	N/A	N/A	N/A	Method	True	False	N/A	N/A	N/A			Pass	Pass	N/A	N/A	N/A	Confirmed	N/A
12	Processed	190419-012		Unknown		305									SCN-Bimane IS	T1C1	Internal Standard	1184	2908	2.22	2.22	0.00		M+	N/A	N/A	N/A	N/A	126.1	126.1	-.002 (mmu)	N/A	N/A	N/A	Method	True	False	N/A	N/A	N/A			Pass	Pass	N/A	N/A	N/A	Confirmed	N/A
13	Processed	190419-013		Unknown		304									SCN-Bimane	T1	Target Compound	1786	4616	2.23	2.21	-0.02		M+	14.782	N/A	14.782	N/A	111	111	.000 (mmu)	0.71	1	6500	Method	True	False	N/A	N/A	N/A			Pass	Pass	N/A	N/A	N/A	Confirmed	N/A
13	Processed	190419-013		Unknown		304									SCN-Bimane	T1C1	Target Compound	853	2085	2.21	2.21	0.00		M+	N/A	N/A	N/A	N/A	124.1	124.1	-.002 (mmu)	0.71	N/A	N/A	Method	True	False	N/A	N/A	N/A			Pass	Pass	N/A	N/A	N/A	Confirmed	N/A
13	Processed	190419-013		Unknown		304									SCN-Bimane IS	T1	Internal Standard	2397	6500	2.24	2.21	-0.03		M+	1	1	1	N/A	111	111	.000 (mmu)	N/A	N/A	N/A	Method	True	False	N/A	N/A	N/A			Pass	Pass	N/A	N/A	N/A	Confirmed	N/A
13	Processed	190419-013		Unknown		304									SCN-Bimane IS	T1C1	Internal Standard	1129	2856	2.21	2.21	0.00		M+	N/A	N/A	N/A	N/A	126.1	126.1	-.002 (mmu)	N/A	N/A	N/A	Method	True	False	N/A	N/A	N/A			Pass	Pass	N/A	N/A	N/A	Confirmed	N/A
14	Processed	190419-014_20190423091825		Unknown		303									SCN-Bimane	T1	Target Compound	1039	2600	2.23	2.22	-0.01		M+	21.717	N/A	21.717	N/A	111	111	.000 (mmu)	0.984	1	2643	Method	True	False	N/A	N/A	N/A			Pass	Pass	N/A	N/A	N/A	Confirmed	N/A
14	Processed	190419-014_20190423091825		Unknown		303									SCN-Bimane	T1C1	Target Compound	497	1226	2.22	2.22	0.00		M+	N/A	N/A	N/A	N/A	124.1	124.1	-.002 (mmu)	0.984	N/A	N/A	Method	True	False	N/A	N/A	N/A			Pass	Pass	N/A	N/A	N/A	Confirmed	N/A
14	Processed	190419-014_20190423091825		Unknown		303									SCN-Bimane IS	T1	Internal Standard	1021	2643	2.24	2.22	-0.02		M+	1	1	1	N/A	111	111	.000 (mmu)	N/A	N/A	N/A	Method	True	False	N/A	N/A	N/A			Pass	Pass	N/A	N/A	N/A	Confirmed	N/A
14	Processed	190419-014_20190423091825		Unknown		303									SCN-Bimane IS	T1C1	Internal Standard	477	1229	2.22	2.22	0.00		M+	N/A	N/A	N/A	N/A	126.1	126.1	-.002 (mmu)	N/A	N/A	N/A	Method	True	False	N/A	N/A	N/A			Pass	Pass	N/A	N/A	N/A	Confirmed	N/A
15	Processed	190419-015		Unknown		302									SCN-Bimane	T1	Target Compound	2071	5252	2.23	2.21	-0.02		M+	20.906	N/A	20.906	N/A	111	111	.000 (mmu)	0.952	1	5517	Method	True	False	N/A	N/A	N/A			Pass	Pass	N/A	N/A	N/A	Confirmed	N/A
15	Processed	190419-015		Unknown		302									SCN-Bimane	T1C1	Target Compound	844	2331	2.21	2.22	-0.01		M+	N/A	N/A	N/A	N/A	124.1	124.1	-.002 (mmu)	0.952	N/A	N/A	Method	True	False	N/A	N/A	N/A			Pass	Pass	N/A	N/A	N/A	Confirmed	N/A
15	Processed	190419-015		Unknown		302									SCN-Bimane IS	T1	Internal Standard	2005	5517	2.24	2.22	-0.02		M+	1	1	1	N/A	111	111	.000 (mmu)	N/A	N/A	N/A	Method	True	False	N/A	N/A	N/A			Pass	Pass	N/A	N/A	N/A	Confirmed	N/A
15	Processed	190419-015		Unknown		302									SCN-Bimane IS	T1C1	Internal Standard	810	2446	2.22	2.22	0.00		M+	N/A	N/A	N/A	N/A	126.1	126.1	-.002 (mmu)	N/A	N/A	N/A	Method	True	False	N/A	N/A	N/A			Pass	Pass	N/A	N/A	N/A	Confirmed	N/A
16	Processed	190419-016_20190423092947		Unknown		293									SCN-Bimane	T1	Target Compound	2696	7105	2.23	2.25	0.02		M+	47.813	N/A	47.813	N/A	111	111	.000 (mmu)	2.014	1	3527	Method	True	False	N/A	N/A	N/A			Pass	Pass	N/A	N/A	N/A	Confirmed	N/A
16	Processed	190419-016_20190423092947		Unknown		293									SCN-Bimane	T1C1	Target Compound	1281	3160	2.25	2.25	0.00		M+	N/A	N/A	N/A	N/A	124.1	124.1	-.002 (mmu)	2.014	N/A	N/A	Method	True	False	N/A	N/A	N/A			Pass	Pass	N/A	N/A	N/A	Confirmed	N/A
16	Processed	190419-016_20190423092947		Unknown		293									SCN-Bimane IS	T1	Internal Standard	1464	3527	2.24	2.25	0.01		M+	1	1	1	N/A	111	111	.000 (mmu)	N/A	N/A	N/A	Method	True	False	N/A	N/A	N/A			Pass	Pass	N/A	N/A	N/A	Confirmed	N/A
16	Processed	190419-016_20190423092947		Unknown		293									SCN-Bimane IS	T1C1	Internal Standard	724	1679	2.25	2.25	0.00		M+	N/A	N/A	N/A	N/A	126.1	126.1	-.002 (mmu)	N/A	N/A	N/A	Method	True	False	N/A	N/A	N/A			Pass	Pass	N/A	N/A	N/A	Confirmed	N/A
17	Processed	190419-017		Unknown		292									SCN-Bimane	T1	Target Compound	2258	6137	2.23	2.21	-0.02		M+	25.572	N/A	25.572	N/A	111	111	.000 (mmu)	1.136	1	5402	Method	True	False	N/A	N/A	N/A			Pass	Pass	N/A	N/A	N/A	Confirmed	N/A
17	Processed	190419-017		Unknown		292									SCN-Bimane	T1C1	Target Compound	1129	3187	2.21	2.2	0.00		M+	N/A	N/A	N/A	N/A	124.1	124.1	-.002 (mmu)	1.136	N/A	N/A	Method	True	False	N/A	N/A	N/A			Pass	Pass	N/A	N/A	N/A	Confirmed	N/A
17	Processed	190419-017		Unknown		292									SCN-Bimane IS	T1	Internal Standard	1977	5402	2.24	2.21	-0.03		M+	1	1	1	N/A	111	111	.000 (mmu)	N/A	N/A	N/A	Method	True	False	N/A	N/A	N/A			Pass	Pass	N/A	N/A	N/A	Confirmed	N/A
17	Processed	190419-017		Unknown		292									SCN-Bimane IS	T1C1	Internal Standard	1000	2488	2.21	2.21	0.00		M+	N/A	N/A	N/A	N/A	126.1	126.1	-.002 (mmu)	N/A	N/A	N/A	Method	True	False	N/A	N/A	N/A			Pass	Pass	N/A	N/A	N/A	Confirmed	N/A
18	Processed	190419-018		Unknown		291									SCN-Bimane	T1	Target Compound	3605	9726	2.23	2.21	-0.02		M+	38.979	N/A	38.979	N/A	111	111	.000 (mmu)	1.666	1	5839	Method	True	False	N/A	N/A	N/A			Pass	Pass	N/A	N/A	N/A	Confirmed	N/A
18	Processed	190419-018		Unknown		291									SCN-Bimane	T1C1	Target Compound	1662	4657	2.21	2.2	0.01		M+	N/A	N/A	N/A	N/A	124.1	124.1	-.002 (mmu)	1.666	N/A	N/A	Method	True	False	N/A	N/A	N/A			Pass	Pass	N/A	N/A	N/A	Confirmed	N/A
18	Processed	190419-018		Unknown		291									SCN-Bimane IS	T1	Internal Standard	2284	5839	2.24	2.2	-0.04		M+	1	1	1	N/A	111	111	.000 (mmu)	N/A	N/A	N/A	Method	True	False	N/A	N/A	N/A			Pass	Pass	N/A	N/A	N/A	Confirmed	N/A
18	Processed	190419-018		Unknown		291									SCN-Bimane IS	T1C1	Internal Standard	1029	2775	2.2	2.21	0.00		M+	N/A	N/A	N/A	N/A	126.1	126.1	-.002 (mmu)	N/A	N/A	N/A	Method	True	False	N/A	N/A	N/A			Pass	Pass	N/A	N/A	N/A	Confirmed	N/A
19	Processed	190419-019		Unknown		290									SCN-Bimane	T1	Target Compound	2659	7193	2.23	2.22	-0.01		M+	35.242	N/A	35.242	N/A	111	111	.000 (mmu)	1.518	1	4738	Method	True	False	N/A	N/A	N/A			Pass	Pass	N/A	N/A	N/A	Confirmed	N/A
19	Processed	190419-019		Unknown		290									SCN-Bimane	T1C1	Target Compound	1307	3319	2.22	2.22	0.00		M+	N/A	N/A	N/A	N/A	124.1	124.1	-.002 (mmu)	1.518	N/A	N/A	Method	True	False	N/A	N/A	N/A			Pass	Pass	N/A	N/A	N/A	Confirmed	N/A
19	Processed	190419-019		Unknown		290									SCN-Bimane IS	T1	Internal Standard	1849	4738	2.24	2.22	-0.02		M+	1	1	1	N/A	111	111	.000 (mmu)	N/A	N/A	N/A	Method	True	False	N/A	N/A	N/A			Pass	Pass	N/A	N/A	N/A	Confirmed	N/A
19	Processed	190419-019		Unknown		290									SCN-Bimane IS	T1C1	Internal Standard	932	2163	2.22	2.22	0.00		M+	N/A	N/A	N/A	N/A	126.1	126.1	-.002 (mmu)	N/A	N/A	N/A	Method	True	False	N/A	N/A	N/A			Pass	Pass	N/A	N/A	N/A	Confirmed	N/A
20	Processed	190419-020		Unknown		289									SCN-Bimane	T1	Target Compound	1798	5019	2.23	2.22	-0.01		M+	27.795	N/A	27.795	N/A	111	111	.000 (mmu)	1.224	1	4100	Method	True	False	N/A	N/A	N/A			Pass	Pass	N/A	N/A	N/A	Confirmed	N/A
20	Processed	190419-020		Unknown		289									SCN-Bimane	T1C1	Target Compound	851	2466	2.22	2.21	0.01		M+	N/A	N/A	N/A	N/A	124.1	124.1	-.002 (mmu)	1.224	N/A	N/A	Method	True	False	N/A	N/A	N/A			Pass	Pass	N/A	N/A	N/A	Confirmed	N/A
20	Processed	190419-020		Unknown		289									SCN-Bimane IS	T1	Internal Standard	1576	4100	2.24	2.22	-0.02		M+	1	1	1	N/A	111	111	.000 (mmu)	N/A	N/A	N/A	Method	True	False	N/A	N/A	N/A			Pass	Pass	N/A	N/A	N/A	Confirmed	N/A
20	Processed	190419-020		Unknown		289									SCN-Bimane IS	T1C1	Internal Standard	805	1924	2.22	2.22	0.00		M+	N/A	N/A	N/A	N/A	126.1	126.1	-.002 (mmu)	N/A	N/A	N/A	Method	True	False	N/A	N/A	N/A			Pass	Pass	N/A	N/A	N/A	Confirmed	N/A
21	Processed	190419-021		Unknown		288									SCN-Bimane	T1	Target Compound	3054	8108	2.23	2.21	-0.02		M+	33.346	N/A	33.346	N/A	111	111	.000 (mmu)	1.443	1	5618	Method	True	False	N/A	N/A	N/A			Pass	Pass	N/A	N/A	N/A	Confirmed	N/A
21	Processed	190419-021		Unknown		288									SCN-Bimane	T1C1	Target Compound	1539	3751	2.21	2.21	0.00		M+	N/A	N/A	N/A	N/A	124.1	124.1	-.002 (mmu)	1.443	N/A	N/A	Method	True	False	N/A	N/A	N/A			Pass	Pass	N/A	N/A	N/A	Confirmed	N/A
21	Processed	190419-021		Unknown		288									SCN-Bimane IS	T1	Internal Standard	2271	5618	2.24	2.21	-0.03		M+	1	1	1	N/A	111	111	.000 (mmu)	N/A	N/A	N/A	Method	True	False	N/A	N/A	N/A			Pass	Pass	N/A	N/A	N/A	Confirmed	N/A
21	Processed	190419-021		Unknown		288									SCN-Bimane IS	T1C1	Internal Standard	991	2652	2.21	2.21	0.01		M+	N/A	N/A	N/A	N/A	126.1	126.1	-.002 (mmu)	N/A	N/A	N/A	Method	True	False	N/A	N/A	N/A			Pass	Pass	N/A	N/A	N/A	Confirmed	N/A
22	Processed	190419-022		Unknown		287									SCN-Bimane	T1	Target Compound	2143	5887	2.23	2.22	-0.01		M+	29.508	N/A	29.508	N/A	111	111	.000 (mmu)	1.292	1	4558	Method	True	False	N/A	N/A	N/A			Pass	Pass	N/A	N/A	N/A	Confirmed	N/A
22	Processed	190419-022		Unknown		287									SCN-Bimane	T1C1	Target Compound	1114	2878	2.22	2.21	0.01		M+	N/A	N/A	N/A	N/A	124.1	124.1	-.002 (mmu)	1.292	N/A	N/A	Method	True	False	N/A	N/A	N/A			Pass	Pass	N/A	N/A	N/A	Confirmed	N/A
22	Processed	190419-022		Unknown		287									SCN-Bimane IS	T1	Internal Standard	1631	4558	2.24	2.21	-0.03		M+	1	1	1	N/A	111	111	.000 (mmu)	N/A	N/A	N/A	Method	True	False	N/A	N/A	N/A			Pass	Pass	N/A	N/A	N/A	Confirmed	N/A
22	Processed	190419-022		Unknown		287									SCN-Bimane IS	T1C1	Internal Standard	676	1882	2.21	2.22	-0.01		M+	N/A	N/A	N/A	N/A	126.1	126.1	-.002 (mmu)	N/A	N/A	N/A	Method	True	False	N/A	N/A	N/A			Pass	Pass	N/A	N/A	N/A	Confirmed	N/A
23	Processed	190419-023		Unknown		286									SCN-Bimane	T1	Target Compound	3752	9964	2.23	2.21	-0.02		M+	36.772	N/A	36.772	N/A	111	111	.000 (mmu)	1.578	1	6313	Method	True	False	N/A	N/A	N/A			Pass	Pass	N/A	N/A	N/A	Confirmed	N/A
23	Processed	190419-023		Unknown		286									SCN-Bimane	T1C1	Target Compound	1715	4738	2.21	2.21	0.00		M+	N/A	N/A	N/A	N/A	124.1	124.1	-.002 (mmu)	1.578	N/A	N/A	Method	True	False	N/A	N/A	N/A			Pass	Pass	N/A	N/A	N/A	Confirmed	N/A
23	Processed	190419-023		Unknown		286									SCN-Bimane IS	T1	Internal Standard	2199	6313	2.24	2.22	-0.02		M+	1	1	1	N/A	111	111	.000 (mmu)	N/A	N/A	N/A	Method	True	False	N/A	N/A	N/A			Pass	Pass	N/A	N/A	N/A	Confirmed	N/A
23	Processed	190419-023		Unknown		286									SCN-Bimane IS	T1C1	Internal Standard	1139	3037	2.22	2.22	0.00		M+	N/A	N/A	N/A	N/A	126.1	126.1	-.002 (mmu)	N/A	N/A	N/A	Method	True	False	N/A	N/A	N/A			Pass	Pass	N/A	N/A	N/A	Confirmed	N/A
24	Processed	190419-024		Unknown		285									SCN-Bimane	T1	Target Compound	3937	11040	2.23	2.21	-0.02		M+	43.988	N/A	43.988	N/A	111	111	.000 (mmu)	1.863	1	5925	Method	True	False	N/A	N/A	N/A			Pass	Pass	N/A	N/A	N/A	Confirmed	N/A
24	Processed	190419-024		Unknown		285									SCN-Bimane	T1C1	Target Compound	1810	4876	2.21	2.21	0.00		M+	N/A	N/A	N/A	N/A	124.1	124.1	-.002 (mmu)	1.863	N/A	N/A	Method	True	False	N/A	N/A	N/A			Pass	Pass	N/A	N/A	N/A	Confirmed	N/A
24	Processed	190419-024		Unknown		285									SCN-Bimane IS	T1	Internal Standard	2284	5925	2.24	2.21	-0.03		M+	1	1	1	N/A	111	111	.000 (mmu)	N/A	N/A	N/A	Method	True	False	N/A	N/A	N/A			Pass	Pass	N/A	N/A	N/A	Confirmed	N/A
24	Processed	190419-024		Unknown		285									SCN-Bimane IS	T1C1	Internal Standard	973	2728	2.21	2.21	0.00		M+	N/A	N/A	N/A	N/A	126.1	126.1	-.002 (mmu)	N/A	N/A	N/A	Method	True	False	N/A	N/A	N/A			Pass	Pass	N/A	N/A	N/A	Confirmed	N/A
25	Processed	190419-025		Unknown		284									SCN-Bimane	T1	Target Compound	3407	8747	2.23	2.21	-0.02		M+	34.865	N/A	34.865	N/A	111	111	.000 (mmu)	1.503	1	5819	Method	True	False	N/A	N/A	N/A			Pass	Pass	N/A	N/A	N/A	Confirmed	N/A
25	Processed	190419-025		Unknown		284									SCN-Bimane	T1C1	Target Compound	1443	3909	2.21	2.21	0.00		M+	N/A	N/A	N/A	N/A	124.1	124.1	-.002 (mmu)	1.503	N/A	N/A	Method	True	False	N/A	N/A	N/A			Pass	Pass	N/A	N/A	N/A	Confirmed	N/A
25	Processed	190419-025		Unknown		284									SCN-Bimane IS	T1	Internal Standard	2122	5819	2.24	2.21	-0.03		M+	1	1	1	N/A	111	111	.000 (mmu)	N/A	N/A	N/A	Method	True	False	N/A	N/A	N/A			Pass	Pass	N/A	N/A	N/A	Confirmed	N/A
25	Processed	190419-025		Unknown		284									SCN-Bimane IS	T1C1	Internal Standard	1031	2741	2.21	2.21	0.00		M+	N/A	N/A	N/A	N/A	126.1	126.1	-.002 (mmu)	N/A	N/A	N/A	Method	True	False	N/A	N/A	N/A			Pass	Pass	N/A	N/A	N/A	Confirmed	N/A
26	Processed	190419-026		Unknown		283									SCN-Bimane	T1	Target Compound	2208	6439	2.23	2.22	-0.01		M+	38.438	N/A	38.438	N/A	111	111	.000 (mmu)	1.644	1	3916	Method	True	False	N/A	N/A	N/A			Pass	Pass	N/A	N/A	N/A	Confirmed	N/A
26	Processed	190419-026		Unknown		283									SCN-Bimane	T1C1	Target Compound	1162	2854	2.22	2.21	0.00		M+	N/A	N/A	N/A	N/A	124.1	124.1	-.002 (mmu)	1.644	N/A	N/A	Method	True	False	N/A	N/A	N/A			Pass	Pass	N/A	N/A	N/A	Confirmed	N/A
26	Processed	190419-026		Unknown		283									SCN-Bimane IS	T1	Internal Standard	1450	3916	2.24	2.21	-0.03		M+	1	1	1	N/A	111	111	.000 (mmu)	N/A	N/A	N/A	Method	True	False	N/A	N/A	N/A			Pass	Pass	N/A	N/A	N/A	Confirmed	N/A
26	Processed	190419-026		Unknown		283									SCN-Bimane IS	T1C1	Internal Standard	774	1917	2.21	2.21	0.00		M+	N/A	N/A	N/A	N/A	126.1	126.1	-.002 (mmu)	N/A	N/A	N/A	Method	True	False	N/A	N/A	N/A			Pass	Pass	N/A	N/A	N/A	Confirmed	N/A
27	Processed	190419-027		Unknown		282									SCN-Bimane	T1	Target Compound	3053	8312	2.23	2.22	-0.01		M+	36.875	N/A	36.875	N/A	111	111	.000 (mmu)	1.582	1	5252	Method	True	False	N/A	N/A	N/A			Pass	Pass	N/A	N/A	N/A	Confirmed	N/A
27	Processed	190419-027		Unknown		282									SCN-Bimane	T1C1	Target Compound	1399	3820	2.22	2.21	0.00		M+	N/A	N/A	N/A	N/A	124.1	124.1	-.002 (mmu)	1.582	N/A	N/A	Method	True	False	N/A	N/A	N/A			Pass	Pass	N/A	N/A	N/A	Confirmed	N/A
27	Processed	190419-027		Unknown		282									SCN-Bimane IS	T1	Internal Standard	1897	5252	2.24	2.22	-0.02		M+	1	1	1	N/A	111	111	.000 (mmu)	N/A	N/A	N/A	Method	True	False	N/A	N/A	N/A			Pass	Pass	N/A	N/A	N/A	Confirmed	N/A
27	Processed	190419-027		Unknown		282									SCN-Bimane IS	T1C1	Internal Standard	899	2631	2.22	2.22	0.00		M+	N/A	N/A	N/A	N/A	126.1	126.1	-.002 (mmu)	N/A	N/A	N/A	Method	True	False	N/A	N/A	N/A			Pass	Pass	N/A	N/A	N/A	Confirmed	N/A
28	Processed	190419-028		Unknown		281									SCN-Bimane	T1	Target Compound	5821	15047	2.23	2.21	-0.02		M+	56.122	N/A	56.122	N/A	111	111	.000 (mmu)	2.342	1	6423	Method	True	False	N/A	N/A	N/A			Pass	Pass	N/A	N/A	N/A	Confirmed	N/A
28	Processed	190419-028		Unknown		281									SCN-Bimane	T1C1	Target Compound	2635	7213	2.21	2.21	0.00		M+	N/A	N/A	N/A	N/A	124.1	124.1	-.002 (mmu)	2.342	N/A	N/A	Method	True	False	N/A	N/A	N/A			Pass	Pass	N/A	N/A	N/A	Confirmed	N/A
28	Processed	190419-028		Unknown		281									SCN-Bimane IS	T1	Internal Standard	2408	6423	2.24	2.21	-0.03		M+	1	1	1	N/A	111	111	.000 (mmu)	N/A	N/A	N/A	Method	True	False	N/A	N/A	N/A			Pass	Pass	N/A	N/A	N/A	Confirmed	N/A
28	Processed	190419-028		Unknown		281									SCN-Bimane IS	T1C1	Internal Standard	1057	2899	2.21	2.21	0.00		M+	N/A	N/A	N/A	N/A	126.1	126.1	-.002 (mmu)	N/A	N/A	N/A	Method	True	False	N/A	N/A	N/A			Pass	Pass	N/A	N/A	N/A	Confirmed	N/A
29	Processed	190419-029		Unknown		280									SCN-Bimane	T1	Target Compound	5269	14660	2.23	2.21	-0.02		M+	56.713	N/A	56.713	N/A	111	111	.000 (mmu)	2.366	1	6197	Method	True	False	N/A	N/A	N/A			Pass	Pass	N/A	N/A	N/A	Confirmed	N/A
29	Processed	190419-029		Unknown		280									SCN-Bimane	T1C1	Target Compound	2751	6837	2.21	2.21	0.00		M+	N/A	N/A	N/A	N/A	124.1	124.1	-.002 (mmu)	2.366	N/A	N/A	Method	True	False	N/A	N/A	N/A			Pass	Pass	N/A	N/A	N/A	Confirmed	N/A
29	Processed	190419-029		Unknown		280									SCN-Bimane IS	T1	Internal Standard	2365	6197	2.24	2.21	-0.03		M+	1	1	1	N/A	111	111	.000 (mmu)	N/A	N/A	N/A	Method	True	False	N/A	N/A	N/A			Pass	Pass	N/A	N/A	N/A	Confirmed	N/A
29	Processed	190419-029		Unknown		280									SCN-Bimane IS	T1C1	Internal Standard	1044	2930	2.21	2.21	0.00		M+	N/A	N/A	N/A	N/A	126.1	126.1	-.002 (mmu)	N/A	N/A	N/A	Method	True	False	N/A	N/A	N/A			Pass	Pass	N/A	N/A	N/A	Confirmed	N/A
30	Processed	190419-030_20190423095418		Unknown		279									SCN-Bimane	T1	Target Compound	7192	18359	2.23	2.26	0.03		M+	79.848	N/A	79.848	N/A	111	111	.000 (mmu)	3.279	1	5599	Method	True	False	N/A	N/A	N/A			Pass	Pass	N/A	N/A	N/A	Confirmed	N/A
30	Processed	190419-030_20190423095418		Unknown		279									SCN-Bimane	T1C1	Target Compound	3132	8736	2.26	2.27	-0.01		M+	N/A	N/A	N/A	N/A	124.1	124.1	-.002 (mmu)	3.279	N/A	N/A	Method	True	False	N/A	N/A	N/A			Pass	Pass	N/A	N/A	N/A	Confirmed	N/A
30	Processed	190419-030_20190423095418		Unknown		279									SCN-Bimane IS	T1	Internal Standard	2292	5599	2.24	2.26	0.02		M+	1	1	1	N/A	111	111	.000 (mmu)	N/A	N/A	N/A	Method	True	False	N/A	N/A	N/A			Pass	Pass	N/A	N/A	N/A	Confirmed	N/A
30	Processed	190419-030_20190423095418		Unknown		279									SCN-Bimane IS	T1C1	Internal Standard	976	2637	2.26	2.26	0.00		M+	N/A	N/A	N/A	N/A	126.1	126.1	-.002 (mmu)	N/A	N/A	N/A	Method	True	False	N/A	N/A	N/A			Pass	Pass	N/A	N/A	N/A	Confirmed	N/A
31	Processed	190419-031		Unknown		278									SCN-Bimane	T1	Target Compound	3155	7862	2.23	2.22	-0.01		M+	34.346	N/A	34.346	N/A	111	111	.000 (mmu)	1.483	1	5303	Method	True	False	N/A	N/A	N/A			Pass	Pass	N/A	N/A	N/A	Confirmed	N/A
31	Processed	190419-031		Unknown		278									SCN-Bimane	T1C1	Target Compound	1243	3705	2.22	2.22	0.00		M+	N/A	N/A	N/A	N/A	124.1	124.1	-.002 (mmu)	1.483	N/A	N/A	Method	True	False	N/A	N/A	N/A			Pass	Pass	N/A	N/A	N/A	Confirmed	N/A
31	Processed	190419-031		Unknown		278									SCN-Bimane IS	T1	Internal Standard	1960	5303	2.24	2.21	-0.03		M+	1	1	1	N/A	111	111	.000 (mmu)	N/A	N/A	N/A	Method	True	False	N/A	N/A	N/A			Pass	Pass	N/A	N/A	N/A	Confirmed	N/A
31	Processed	190419-031		Unknown		278									SCN-Bimane IS	T1C1	Internal Standard	874	2422	2.21	2.21	0.00		M+	N/A	N/A	N/A	N/A	126.1	126.1	-.002 (mmu)	N/A	N/A	N/A	Method	True	False	N/A	N/A	N/A			Pass	Pass	N/A	N/A	N/A	Confirmed	N/A
32	Processed	190419-032_20190423100707		Unknown		277									SCN-Bimane	T1	Target Compound	5694	14494	2.23	2.26	0.03		M+	60.316	N/A	60.316	N/A	111	111	.000 (mmu)	2.508	1	5779	Method	True	False	N/A	N/A	N/A			Pass	Pass	N/A	N/A	N/A	Confirmed	N/A
32	Processed	190419-032_20190423100707		Unknown		277									SCN-Bimane	T1C1	Target Compound	2510	6677	2.26	2.26	0.00		M+	N/A	N/A	N/A	N/A	124.1	124.1	-.002 (mmu)	2.508	N/A	N/A	Method	True	False	N/A	N/A	N/A			Pass	Pass	N/A	N/A	N/A	Confirmed	N/A
32	Processed	190419-032_20190423100707		Unknown		277									SCN-Bimane IS	T1	Internal Standard	2223	5779	2.24	2.26	0.02		M+	1	1	1	N/A	111	111	.000 (mmu)	N/A	N/A	N/A	Method	True	False	N/A	N/A	N/A			Pass	Pass	N/A	N/A	N/A	Confirmed	N/A
32	Processed	190419-032_20190423100707		Unknown		277									SCN-Bimane IS	T1C1	Internal Standard	1096	2770	2.26	2.27	-0.01		M+	N/A	N/A	N/A	N/A	126.1	126.1	-.002 (mmu)	N/A	N/A	N/A	Method	True	False	N/A	N/A	N/A			Pass	Pass	N/A	N/A	N/A	Confirmed	N/A
33	Processed	190419-033		Unknown		276									SCN-Bimane	T1	Target Compound	5464	14765	2.23	2.21	-0.02		M+	63.879	N/A	63.879	N/A	111	111	.000 (mmu)	2.649	1	5575	Method	True	False	N/A	N/A	N/A			Pass	Pass	N/A	N/A	N/A	Confirmed	N/A
33	Processed	190419-033		Unknown		276									SCN-Bimane	T1C1	Target Compound	2323	6871	2.21	2.21	0.00		M+	N/A	N/A	N/A	N/A	124.1	124.1	-.002 (mmu)	2.649	N/A	N/A	Method	True	False	N/A	N/A	N/A			Pass	Pass	N/A	N/A	N/A	Confirmed	N/A
33	Processed	190419-033		Unknown		276									SCN-Bimane IS	T1	Internal Standard	2069	5575	2.24	2.21	-0.03		M+	1	1	1	N/A	111	111	.000 (mmu)	N/A	N/A	N/A	Method	True	False	N/A	N/A	N/A			Pass	Pass	N/A	N/A	N/A	Confirmed	N/A
33	Processed	190419-033		Unknown		276									SCN-Bimane IS	T1C1	Internal Standard	870	2488	2.21	2.21	0.01		M+	N/A	N/A	N/A	N/A	126.1	126.1	-.002 (mmu)	N/A	N/A	N/A	Method	True	False	N/A	N/A	N/A			Pass	Pass	N/A	N/A	N/A	Confirmed	N/A
34	Processed	190419-034		Unknown		275									SCN-Bimane	T1	Target Compound	5128	14154	2.23	2.2	-0.03		M+	59.048	N/A	59.048	N/A	111	111	.000 (mmu)	2.458	1	5758	Method	True	False	N/A	N/A	N/A			Pass	Pass	N/A	N/A	N/A	Confirmed	N/A
34	Processed	190419-034		Unknown		275									SCN-Bimane	T1C1	Target Compound	2324	6514	2.2	2.22	-0.01		M+	N/A	N/A	N/A	N/A	124.1	124.1	-.002 (mmu)	2.458	N/A	N/A	Method	True	False	N/A	N/A	N/A			Pass	Pass	N/A	N/A	N/A	Confirmed	N/A
34	Processed	190419-034		Unknown		275									SCN-Bimane IS	T1	Internal Standard	2095	5758	2.24	2.21	-0.03		M+	1	1	1	N/A	111	111	.000 (mmu)	N/A	N/A	N/A	Method	True	False	N/A	N/A	N/A			Pass	Pass	N/A	N/A	N/A	Confirmed	N/A
34	Processed	190419-034		Unknown		275									SCN-Bimane IS	T1C1	Internal Standard	1154	2714	2.21	2.21	0.00		M+	N/A	N/A	N/A	N/A	126.1	126.1	-.002 (mmu)	N/A	N/A	N/A	Method	True	False	N/A	N/A	N/A			Pass	Pass	N/A	N/A	N/A	Confirmed	N/A
35	Processed	190419-035		Unknown		274									SCN-Bimane	T1	Target Compound	5363	14931	2.23	2.21	-0.02		M+	57.947	N/A	57.947	N/A	111	111	.000 (mmu)	2.414	1	6184	Method	True	False	N/A	N/A	N/A			Pass	Pass	N/A	N/A	N/A	Confirmed	N/A
35	Processed	190419-035		Unknown		274									SCN-Bimane	T1C1	Target Compound	2426	6850	2.21	2.22	-0.01		M+	N/A	N/A	N/A	N/A	124.1	124.1	-.002 (mmu)	2.414	N/A	N/A	Method	True	False	N/A	N/A	N/A			Pass	Pass	N/A	N/A	N/A	Confirmed	N/A
35	Processed	190419-035		Unknown		274									SCN-Bimane IS	T1	Internal Standard	2292	6184	2.24	2.22	-0.02		M+	1	1	1	N/A	111	111	.000 (mmu)	N/A	N/A	N/A	Method	True	False	N/A	N/A	N/A			Pass	Pass	N/A	N/A	N/A	Confirmed	N/A
35	Processed	190419-035		Unknown		274									SCN-Bimane IS	T1C1	Internal Standard	1000	2631	2.22	2.21	0.01		M+	N/A	N/A	N/A	N/A	126.1	126.1	-.002 (mmu)	N/A	N/A	N/A	Method	True	False	N/A	N/A	N/A			Pass	Pass	N/A	N/A	N/A	Confirmed	N/A
36	Processed	190419-036		Unknown		273									SCN-Bimane	T1	Target Compound	4839	13280	2.23	2.21	-0.02		M+	45.766	N/A	45.766	N/A	111	111	.000 (mmu)	1.934	1	6868	Method	True	False	N/A	N/A	N/A			Pass	Pass	N/A	N/A	N/A	Confirmed	N/A
36	Processed	190419-036		Unknown		273									SCN-Bimane	T1C1	Target Compound	2233	5992	2.21	2.21	0.00		M+	N/A	N/A	N/A	N/A	124.1	124.1	-.002 (mmu)	1.934	N/A	N/A	Method	True	False	N/A	N/A	N/A			Pass	Pass	N/A	N/A	N/A	Confirmed	N/A
36	Processed	190419-036		Unknown		273									SCN-Bimane IS	T1	Internal Standard	2520	6868	2.24	2.22	-0.02		M+	1	1	1	N/A	111	111	.000 (mmu)	N/A	N/A	N/A	Method	True	False	N/A	N/A	N/A			Pass	Pass	N/A	N/A	N/A	Confirmed	N/A
36	Processed	190419-036		Unknown		273									SCN-Bimane IS	T1C1	Internal Standard	1187	3125	2.22	2.22	0.00		M+	N/A	N/A	N/A	N/A	126.1	126.1	-.002 (mmu)	N/A	N/A	N/A	Method	True	False	N/A	N/A	N/A			Pass	Pass	N/A	N/A	N/A	Confirmed	N/A
37	Processed	190419-037		Unknown		272									SCN-Bimane	T1	Target Compound	3753	9846	2.23	2.21	-0.02		M+	40.662	N/A	40.662	N/A	111	111	.000 (mmu)	1.732	1	5685	Method	True	False	N/A	N/A	N/A			Pass	Pass	N/A	N/A	N/A	Confirmed	N/A
37	Processed	190419-037		Unknown		272									SCN-Bimane	T1C1	Target Compound	1727	4602	2.21	2.21	0.00		M+	N/A	N/A	N/A	N/A	124.1	124.1	-.002 (mmu)	1.732	N/A	N/A	Method	True	False	N/A	N/A	N/A			Pass	Pass	N/A	N/A	N/A	Confirmed	N/A
37	Processed	190419-037		Unknown		272									SCN-Bimane IS	T1	Internal Standard	2225	5685	2.24	2.21	-0.03		M+	1	1	1	N/A	111	111	.000 (mmu)	N/A	N/A	N/A	Method	True	False	N/A	N/A	N/A			Pass	Pass	N/A	N/A	N/A	Confirmed	N/A
37	Processed	190419-037		Unknown		272									SCN-Bimane IS	T1C1	Internal Standard	998	2749	2.21	2.21	0.00		M+	N/A	N/A	N/A	N/A	126.1	126.1	-.002 (mmu)	N/A	N/A	N/A	Method	True	False	N/A	N/A	N/A			Pass	Pass	N/A	N/A	N/A	Confirmed	N/A
38	Processed	190419-038		Unknown		271									SCN-Bimane	T1	Target Compound	4674	12822	2.23	2.21	-0.02		M+	50.362	N/A	50.362	N/A	111	111	.000 (mmu)	2.115	1	6063	Method	True	False	N/A	N/A	N/A			Pass	Pass	N/A	N/A	N/A	Confirmed	N/A
38	Processed	190419-038		Unknown		271									SCN-Bimane	T1C1	Target Compound	2186	5858	2.21	2.21	0.00		M+	N/A	N/A	N/A	N/A	124.1	124.1	-.002 (mmu)	2.115	N/A	N/A	Method	True	False	N/A	N/A	N/A			Pass	Pass	N/A	N/A	N/A	Confirmed	N/A
38	Processed	190419-038		Unknown		271									SCN-Bimane IS	T1	Internal Standard	2096	6063	2.24	2.21	-0.03		M+	1	1	1	N/A	111	111	.000 (mmu)	N/A	N/A	N/A	Method	True	False	N/A	N/A	N/A			Pass	Pass	N/A	N/A	N/A	Confirmed	N/A
38	Processed	190419-038		Unknown		271									SCN-Bimane IS	T1C1	Internal Standard	1089	2706	2.21	2.21	0.01		M+	N/A	N/A	N/A	N/A	126.1	126.1	-.002 (mmu)	N/A	N/A	N/A	Method	True	False	N/A	N/A	N/A			Pass	Pass	N/A	N/A	N/A	Confirmed	N/A
39	Processed	190419-039_20190423101829		Unknown		270									SCN-Bimane	T1	Target Compound	1836	5000	2.23	2.26	0.03		M+	42.563	N/A	42.563	N/A	111	111	.000 (mmu)	1.807	1	2767	Method	True	False	N/A	N/A	N/A			Pass	Pass	N/A	N/A	N/A	Confirmed	N/A
39	Processed	190419-039_20190423101829		Unknown		270									SCN-Bimane	T1C1	Target Compound	901	2243	2.26	2.25	0.01		M+	N/A	N/A	N/A	N/A	124.1	124.1	-.002 (mmu)	1.807	N/A	N/A	Method	True	False	N/A	N/A	N/A			Pass	Pass	N/A	N/A	N/A	Confirmed	N/A
39	Processed	190419-039_20190423101829		Unknown		270									SCN-Bimane IS	T1	Internal Standard	1080	2767	2.24	2.27	0.03		M+	1	1	1	N/A	111	111	.000 (mmu)	N/A	N/A	N/A	Method	True	False	N/A	N/A	N/A			Pass	Pass	N/A	N/A	N/A	Confirmed	N/A
39	Processed	190419-039_20190423101829		Unknown		270									SCN-Bimane IS	T1C1	Internal Standard	465	1204	2.27	2.25	0.01		M+	N/A	N/A	N/A	N/A	126.1	126.1	-.002 (mmu)	N/A	N/A	N/A	Method	True	False	N/A	N/A	N/A			Pass	Pass	N/A	N/A	N/A	Confirmed	N/A
40	Processed	190419-040_20190423105240		Unknown		298									SCN-Bimane	T1	Target Compound	2385	6638	2.23	2.26	0.03		M+	32.927	N/A	32.927	N/A	111	111	.000 (mmu)	1.427	1	4653	Method	True	False	N/A	N/A	N/A			Pass	Pass	N/A	N/A	N/A	Confirmed	N/A
40	Processed	190419-040_20190423105240		Unknown		298									SCN-Bimane	T1C1	Target Compound	1231	3084	2.26	2.26	0.00		M+	N/A	N/A	N/A	N/A	124.1	124.1	-.002 (mmu)	1.427	N/A	N/A	Method	True	False	N/A	N/A	N/A			Pass	Pass	N/A	N/A	N/A	Confirmed	N/A
40	Processed	190419-040_20190423105240		Unknown		298									SCN-Bimane IS	T1	Internal Standard	1895	4653	2.24	2.27	0.03		M+	1	1	1	N/A	111	111	.000 (mmu)	N/A	N/A	N/A	Method	True	False	N/A	N/A	N/A			Pass	Pass	N/A	N/A	N/A	Confirmed	N/A
40	Processed	190419-040_20190423105240		Unknown		298									SCN-Bimane IS	T1C1	Internal Standard	796	2213	2.27	2.26	0.01		M+	N/A	N/A	N/A	N/A	126.1	126.1	-.002 (mmu)	N/A	N/A	N/A	Method	True	False	N/A	N/A	N/A			Pass	Pass	N/A	N/A	N/A	Confirmed	N/A
41	Processed	190419-041		Unknown		299									SCN-Bimane	T1	Target Compound	2855	7708	2.23	2.21	-0.02		M+	31.001	N/A	31.001	N/A	111	111	.000 (mmu)	1.351	1	5708	Method	True	False	N/A	N/A	N/A			Pass	Pass	N/A	N/A	N/A	Confirmed	N/A
41	Processed	190419-041		Unknown		299									SCN-Bimane	T1C1	Target Compound	1296	3401	2.21	2.21	0.00		M+	N/A	N/A	N/A	N/A	124.1	124.1	-.002 (mmu)	1.351	N/A	N/A	Method	True	False	N/A	N/A	N/A			Pass	Pass	N/A	N/A	N/A	Confirmed	N/A
41	Processed	190419-041		Unknown		299									SCN-Bimane IS	T1	Internal Standard	2192	5708	2.24	2.21	-0.03		M+	1	1	1	N/A	111	111	.000 (mmu)	N/A	N/A	N/A	Method	True	False	N/A	N/A	N/A			Pass	Pass	N/A	N/A	N/A	Confirmed	N/A
41	Processed	190419-041		Unknown		299									SCN-Bimane IS	T1C1	Internal Standard	1011	2590	2.21	2.2	0.01		M+	N/A	N/A	N/A	N/A	126.1	126.1	-.002 (mmu)	N/A	N/A	N/A	Method	True	False	N/A	N/A	N/A			Pass	Pass	N/A	N/A	N/A	Confirmed	N/A
42	Processed	190419-042		Unknown		300									SCN-Bimane	T1	Target Compound	2392	6246	2.23	2.21	-0.02		M+	32.748	N/A	32.748	N/A	111	111	.000 (mmu)	1.42	1	4400	Method	True	False	N/A	N/A	N/A			Pass	Pass	N/A	N/A	N/A	Confirmed	N/A
42	Processed	190419-042		Unknown		300									SCN-Bimane	T1C1	Target Compound	1069	2710	2.21	2.21	-0.01		M+	N/A	N/A	N/A	N/A	124.1	124.1	-.002 (mmu)	1.42	N/A	N/A	Method	True	False	N/A	N/A	N/A			Pass	Pass	N/A	N/A	N/A	Confirmed	N/A
42	Processed	190419-042		Unknown		300									SCN-Bimane IS	T1	Internal Standard	1824	4400	2.24	2.22	-0.02		M+	1	1	1	N/A	111	111	.000 (mmu)	N/A	N/A	N/A	Method	True	False	N/A	N/A	N/A			Pass	Pass	N/A	N/A	N/A	Confirmed	N/A
42	Processed	190419-042		Unknown		300									SCN-Bimane IS	T1C1	Internal Standard	964	2369	2.22	2.22	0.00		M+	N/A	N/A	N/A	N/A	126.1	126.1	-.002 (mmu)	N/A	N/A	N/A	Method	True	False	N/A	N/A	N/A			Pass	Pass	N/A	N/A	N/A	Confirmed	N/A
43	Processed	190419-043		Unknown		301									SCN-Bimane	T1	Target Compound	3314	9196	2.23	2.21	-0.02		M+	37.978	N/A	37.978	N/A	111	111	.000 (mmu)	1.626	1	5655	Method	True	False	N/A	N/A	N/A			Pass	Pass	N/A	N/A	N/A	Confirmed	N/A
43	Processed	190419-043		Unknown		301									SCN-Bimane	T1C1	Target Compound	1598	4138	2.21	2.21	0.00		M+	N/A	N/A	N/A	N/A	124.1	124.1	-.002 (mmu)	1.626	N/A	N/A	Method	True	False	N/A	N/A	N/A			Pass	Pass	N/A	N/A	N/A	Confirmed	N/A
43	Processed	190419-043		Unknown		301									SCN-Bimane IS	T1	Internal Standard	2072	5655	2.24	2.21	-0.03		M+	1	1	1	N/A	111	111	.000 (mmu)	N/A	N/A	N/A	Method	True	False	N/A	N/A	N/A			Pass	Pass	N/A	N/A	N/A	Confirmed	N/A
43	Processed	190419-043		Unknown		301									SCN-Bimane IS	T1C1	Internal Standard	907	2712	2.21	2.21	0.01		M+	N/A	N/A	N/A	N/A	126.1	126.1	-.002 (mmu)	N/A	N/A	N/A	Method	True	False	N/A	N/A	N/A			Pass	Pass	N/A	N/A	N/A	Confirmed	N/A
44	Processed	190419-044		Unknown		308									SCN-Bimane	T1	Target Compound	1421	4635	2.23	2.21	-0.02		M+	19.171	N/A	19.171	N/A	111	111	.000 (mmu)	0.883	1	5247	Method	True	False	N/A	N/A	N/A			Pass	Pass	N/A	N/A	N/A	Confirmed	N/A
44	Processed	190419-044		Unknown		308									SCN-Bimane	T1C1	Target Compound	748	2019	2.21	2.21	0.00		M+	N/A	N/A	N/A	N/A	124.1	124.1	-.002 (mmu)	0.883	N/A	N/A	Method	True	False	N/A	N/A	N/A			Pass	Pass	N/A	N/A	N/A	Confirmed	N/A
44	Processed	190419-044		Unknown		308									SCN-Bimane IS	T1	Internal Standard	1962	5247	2.24	2.21	-0.03		M+	1	1	1	N/A	111	111	.000 (mmu)	N/A	N/A	N/A	Method	True	False	N/A	N/A	N/A			Pass	Pass	N/A	N/A	N/A	Confirmed	N/A
44	Processed	190419-044		Unknown		308									SCN-Bimane IS	T1C1	Internal Standard	915	2531	2.21	2.21	0.00		M+	N/A	N/A	N/A	N/A	126.1	126.1	-.002 (mmu)	N/A	N/A	N/A	Method	True	False	N/A	N/A	N/A			Pass	Pass	N/A	N/A	N/A	Confirmed	N/A
45	Processed	190419-045		Unknown		309									SCN-Bimane	T1	Target Compound	1995	5122	2.23	2.21	-0.02		M+	22.065	N/A	22.065	N/A	111	111	.000 (mmu)	0.998	1	5134	Method	True	False	N/A	N/A	N/A			Pass	Pass	N/A	N/A	N/A	Confirmed	N/A
45	Processed	190419-045		Unknown		309									SCN-Bimane	T1C1	Target Compound	807	2188	2.21	2.21	0.00		M+	N/A	N/A	N/A	N/A	124.1	124.1	-.002 (mmu)	0.998	N/A	N/A	Method	True	False	N/A	N/A	N/A			Pass	Pass	N/A	N/A	N/A	Confirmed	N/A
45	Processed	190419-045		Unknown		309									SCN-Bimane IS	T1	Internal Standard	2154	5134	2.24	2.21	-0.03		M+	1	1	1	N/A	111	111	.000 (mmu)	N/A	N/A	N/A	Method	True	False	N/A	N/A	N/A			Pass	Pass	N/A	N/A	N/A	Confirmed	N/A
45	Processed	190419-045		Unknown		309									SCN-Bimane IS	T1C1	Internal Standard	1022	2513	2.21	2.21	0.00		M+	N/A	N/A	N/A	N/A	126.1	126.1	-.002 (mmu)	N/A	N/A	N/A	Method	True	False	N/A	N/A	N/A			Pass	Pass	N/A	N/A	N/A	Confirmed	N/A
46	Processed	190419-046		Unknown		296/295									SCN-Bimane	T1	Target Compound	2571	6695	2.23	2.21	-0.02		M+	25.052	N/A	25.052	N/A	111	111	.000 (mmu)	1.116	1	6001	Method	True	False	N/A	N/A	N/A			Pass	Pass	N/A	N/A	N/A	Confirmed	N/A
46	Processed	190419-046		Unknown		296/295									SCN-Bimane	T1C1	Target Compound	1183	3185	2.21	2.21	0.00		M+	N/A	N/A	N/A	N/A	124.1	124.1	-.002 (mmu)	1.116	N/A	N/A	Method	True	False	N/A	N/A	N/A			Pass	Pass	N/A	N/A	N/A	Confirmed	N/A
46	Processed	190419-046		Unknown		296/295									SCN-Bimane IS	T1	Internal Standard	2080	6001	2.24	2.22	-0.02		M+	1	1	1	N/A	111	111	.000 (mmu)	N/A	N/A	N/A	Method	True	False	N/A	N/A	N/A			Pass	Pass	N/A	N/A	N/A	Confirmed	N/A
46	Processed	190419-046		Unknown		296/295									SCN-Bimane IS	T1C1	Internal Standard	994	2740	2.22	2.21	0.01		M+	N/A	N/A	N/A	N/A	126.1	126.1	-.002 (mmu)	N/A	N/A	N/A	Method	True	False	N/A	N/A	N/A			Pass	Pass	N/A	N/A	N/A	Confirmed	N/A
47	Processed	190419-047_20190423110719		Unknown		294/297									SCN-Bimane	T1	Target Compound	12844	34748	2.23	2.26	0.03		M+	93.606	N/A	93.606	N/A	111	111	.000 (mmu)	3.822	1	9090	Method	True	False	N/A	N/A	N/A			Pass	Pass	N/A	N/A	N/A	Confirmed	N/A
47	Processed	190419-047_20190423110719		Unknown		294/297									SCN-Bimane	T1C1	Target Compound	6371	16330	2.26	2.25	0.00		M+	N/A	N/A	N/A	N/A	124.1	124.1	-.002 (mmu)	3.822	N/A	N/A	Method	True	False	N/A	N/A	N/A			Pass	Pass	N/A	N/A	N/A	Confirmed	N/A
47	Processed	190419-047_20190423110719		Unknown		294/297									SCN-Bimane IS	T1	Internal Standard	3612	9090	2.24	2.26	0.02		M+	1	1	1	N/A	111	111	.000 (mmu)	N/A	N/A	N/A	Method	True	False	N/A	N/A	N/A			Pass	Pass	N/A	N/A	N/A	Confirmed	N/A
47	Processed	190419-047_20190423110719		Unknown		294/297									SCN-Bimane IS	T1C1	Internal Standard	1570	4031	2.26	2.26	0.00		M+	N/A	N/A	N/A	N/A	126.1	126.1	-.002 (mmu)	N/A	N/A	N/A	Method	True	False	N/A	N/A	N/A			Pass	Pass	N/A	N/A	N/A	Confirmed	N/A
48	Processed	190419-048		Unknown		266									SCN-Bimane	T1	Target Compound	2030	5243	2.23	2.21	-0.02		M+	21.07	N/A	21.07	N/A	111	111	.000 (mmu)	0.958	1	5470	Method	True	False	N/A	N/A	N/A			Pass	Pass	N/A	N/A	N/A	Confirmed	N/A
48	Processed	190419-048		Unknown		266									SCN-Bimane	T1C1	Target Compound	891	2519	2.21	2.21	0.00		M+	N/A	N/A	N/A	N/A	124.1	124.1	-.002 (mmu)	0.958	N/A	N/A	Method	True	False	N/A	N/A	N/A			Pass	Pass	N/A	N/A	N/A	Confirmed	N/A
48	Processed	190419-048		Unknown		266									SCN-Bimane IS	T1	Internal Standard	1994	5470	2.24	2.21	-0.03		M+	1	1	1	N/A	111	111	.000 (mmu)	N/A	N/A	N/A	Method	True	False	N/A	N/A	N/A			Pass	Pass	N/A	N/A	N/A	Confirmed	N/A
48	Processed	190419-048		Unknown		266									SCN-Bimane IS	T1C1	Internal Standard	992	2825	2.21	2.22	0.00		M+	N/A	N/A	N/A	N/A	126.1	126.1	-.002 (mmu)	N/A	N/A	N/A	Method	True	False	N/A	N/A	N/A			Pass	Pass	N/A	N/A	N/A	Confirmed	N/A
49	Processed	190419-049		Unknown		265									SCN-Bimane	T1	Target Compound	2575	6738	2.23	2.21	-0.02		M+	28.069	N/A	28.069	N/A	111	111	.000 (mmu)	1.235	1	5457	Method	True	False	N/A	N/A	N/A			Pass	Pass	N/A	N/A	N/A	Confirmed	N/A
49	Processed	190419-049		Unknown		265									SCN-Bimane	T1C1	Target Compound	1195	3117	2.21	2.21	0.00		M+	N/A	N/A	N/A	N/A	124.1	124.1	-.002 (mmu)	1.235	N/A	N/A	Method	True	False	N/A	N/A	N/A			Pass	Pass	N/A	N/A	N/A	Confirmed	N/A
49	Processed	190419-049		Unknown		265									SCN-Bimane IS	T1	Internal Standard	2069	5457	2.24	2.21	-0.03		M+	1	1	1	N/A	111	111	.000 (mmu)	N/A	N/A	N/A	Method	True	False	N/A	N/A	N/A			Pass	Pass	N/A	N/A	N/A	Confirmed	N/A
49	Processed	190419-049		Unknown		265									SCN-Bimane IS	T1C1	Internal Standard	902	2572	2.21	2.2	0.01		M+	N/A	N/A	N/A	N/A	126.1	126.1	-.002 (mmu)	N/A	N/A	N/A	Method	True	False	N/A	N/A	N/A			Pass	Pass	N/A	N/A	N/A	Confirmed	N/A
50	Processed	190419-050		Unknown		264									SCN-Bimane	T1	Target Compound	1668	4363	2.23	2.21	-0.02		M+	17.171	N/A	17.171	N/A	111	111	.000 (mmu)	0.804	1	5424	Method	True	False	N/A	N/A	N/A			Pass	Pass	N/A	N/A	N/A	Confirmed	N/A
50	Processed	190419-050		Unknown		264									SCN-Bimane	T1C1	Target Compound	761	1959	2.21	2.22	-0.01		M+	N/A	N/A	N/A	N/A	124.1	124.1	-.002 (mmu)	0.804	N/A	N/A	Method	True	False	N/A	N/A	N/A			Pass	Pass	N/A	N/A	N/A	Confirmed	N/A
50	Processed	190419-050		Unknown		264									SCN-Bimane IS	T1	Internal Standard	2070	5424	2.24	2.21	-0.03		M+	1	1	1	N/A	111	111	.000 (mmu)	N/A	N/A	N/A	Method	True	False	N/A	N/A	N/A			Pass	Pass	N/A	N/A	N/A	Confirmed	N/A
50	Processed	190419-050		Unknown		264									SCN-Bimane IS	T1C1	Internal Standard	1069	2625	2.21	2.22	-0.01		M+	N/A	N/A	N/A	N/A	126.1	126.1	-.002 (mmu)	N/A	N/A	N/A	Method	True	False	N/A	N/A	N/A			Pass	Pass	N/A	N/A	N/A	Confirmed	N/A
51	Processed	190419-051		Unknown		263									SCN-Bimane	T1	Target Compound	3579	9442	2.23	2.21	-0.02		M+	41.995	N/A	41.995	N/A	111	111	.000 (mmu)	1.785	1	5291	Method	True	False	N/A	N/A	N/A			Pass	Pass	N/A	N/A	N/A	Confirmed	N/A
51	Processed	190419-051		Unknown		263									SCN-Bimane	T1C1	Target Compound	1619	4557	2.21	2.22	-0.01		M+	N/A	N/A	N/A	N/A	124.1	124.1	-.002 (mmu)	1.785	N/A	N/A	Method	True	False	N/A	N/A	N/A			Pass	Pass	N/A	N/A	N/A	Confirmed	N/A
51	Processed	190419-051		Unknown		263									SCN-Bimane IS	T1	Internal Standard	1947	5291	2.24	2.22	-0.02		M+	1	1	1	N/A	111	111	.000 (mmu)	N/A	N/A	N/A	Method	True	False	N/A	N/A	N/A			Pass	Pass	N/A	N/A	N/A	Confirmed	N/A
51	Processed	190419-051		Unknown		263									SCN-Bimane IS	T1C1	Internal Standard	998	2672	2.22	2.21	0.00		M+	N/A	N/A	N/A	N/A	126.1	126.1	-.002 (mmu)	N/A	N/A	N/A	Method	True	False	N/A	N/A	N/A			Pass	Pass	N/A	N/A	N/A	Confirmed	N/A
52	Processed	190419-052_20190423112622		Unknown		262									SCN-Bimane	T1	Target Compound	3796	9530	2.23	2.26	0.03		M+	46.665	N/A	46.665	N/A	111	111	.000 (mmu)	1.969	1	4840	Method	True	False	N/A	N/A	N/A			Pass	Pass	N/A	N/A	N/A	Confirmed	N/A
52	Processed	190419-052_20190423112622		Unknown		262									SCN-Bimane	T1C1	Target Compound	1821	4496	2.26	2.25	0.00		M+	N/A	N/A	N/A	N/A	124.1	124.1	-.002 (mmu)	1.969	N/A	N/A	Method	True	False	N/A	N/A	N/A			Pass	Pass	N/A	N/A	N/A	Confirmed	N/A
52	Processed	190419-052_20190423112622		Unknown		262									SCN-Bimane IS	T1	Internal Standard	2001	4840	2.24	2.27	0.03		M+	1	1	1	N/A	111	111	.000 (mmu)	N/A	N/A	N/A	Method	True	False	N/A	N/A	N/A			Pass	Pass	N/A	N/A	N/A	Confirmed	N/A
52	Processed	190419-052_20190423112622		Unknown		262									SCN-Bimane IS	T1C1	Internal Standard	851	2315	2.27	2.27	0.00		M+	N/A	N/A	N/A	N/A	126.1	126.1	-.002 (mmu)	N/A	N/A	N/A	Method	True	False	N/A	N/A	N/A			Pass	Pass	N/A	N/A	N/A	Confirmed	N/A
53	Processed	190419-053		Unknown		261									SCN-Bimane	T1	Target Compound	2878	8516	2.23	2.21	-0.02		M+	30.387	N/A	30.387	N/A	111	111	.000 (mmu)	1.326	1	6421	Method	True	False	N/A	N/A	N/A			Pass	Pass	N/A	N/A	N/A	Confirmed	N/A
53	Processed	190419-053		Unknown		261									SCN-Bimane	T1C1	Target Compound	1492	4103	2.21	2.22	-0.01		M+	N/A	N/A	N/A	N/A	124.1	124.1	-.002 (mmu)	1.326	N/A	N/A	Method	True	False	N/A	N/A	N/A			Pass	Pass	N/A	N/A	N/A	Confirmed	N/A
53	Processed	190419-053		Unknown		261									SCN-Bimane IS	T1	Internal Standard	2250	6421	2.24	2.22	-0.02		M+	1	1	1	N/A	111	111	.000 (mmu)	N/A	N/A	N/A	Method	True	False	N/A	N/A	N/A			Pass	Pass	N/A	N/A	N/A	Confirmed	N/A
53	Processed	190419-053		Unknown		261									SCN-Bimane IS	T1C1	Internal Standard	1224	2974	2.22	2.21	0.00		M+	N/A	N/A	N/A	N/A	126.1	126.1	-.002 (mmu)	N/A	N/A	N/A	Method	True	False	N/A	N/A	N/A			Pass	Pass	N/A	N/A	N/A	Confirmed	N/A
54	Processed	190419-054		Unknown		260									SCN-Bimane	T1	Target Compound	1971	5631	2.23	2.21	-0.02		M+	35.505	N/A	35.505	N/A	111	111	.000 (mmu)	1.528	1	3684	Method	True	False	N/A	N/A	N/A			Pass	Pass	N/A	N/A	N/A	Confirmed	N/A
54	Processed	190419-054		Unknown		260									SCN-Bimane	T1C1	Target Compound	1029	2520	2.21	2.21	0.00		M+	N/A	N/A	N/A	N/A	124.1	124.1	-.002 (mmu)	1.528	N/A	N/A	Method	True	False	N/A	N/A	N/A			Pass	Pass	N/A	N/A	N/A	Confirmed	N/A
54	Processed	190419-054		Unknown		260									SCN-Bimane IS	T1	Internal Standard	1329	3684	2.24	2.22	-0.02		M+	1	1	1	N/A	111	111	.000 (mmu)	N/A	N/A	N/A	Method	True	False	N/A	N/A	N/A			Pass	Pass	N/A	N/A	N/A	Confirmed	N/A
54	Processed	190419-054		Unknown		260									SCN-Bimane IS	T1C1	Internal Standard	655	1693	2.22	2.21	0.01		M+	N/A	N/A	N/A	N/A	126.1	126.1	-.002 (mmu)	N/A	N/A	N/A	Method	True	False	N/A	N/A	N/A			Pass	Pass	N/A	N/A	N/A	Confirmed	N/A
55	Processed	190419-055		Unknown		259									SCN-Bimane	T1	Target Compound	2512	7215	2.23	2.21	-0.02		M+	31.334	N/A	31.334	N/A	111	111	.000 (mmu)	1.364	1	5291	Method	True	False	N/A	N/A	N/A			Pass	Pass	N/A	N/A	N/A	Confirmed	N/A
55	Processed	190419-055		Unknown		259									SCN-Bimane	T1C1	Target Compound	1188	3198	2.21	2.21	0.00		M+	N/A	N/A	N/A	N/A	124.1	124.1	-.002 (mmu)	1.364	N/A	N/A	Method	True	False	N/A	N/A	N/A			Pass	Pass	N/A	N/A	N/A	Confirmed	N/A
55	Processed	190419-055		Unknown		259									SCN-Bimane IS	T1	Internal Standard	1827	5291	2.24	2.21	-0.03		M+	1	1	1	N/A	111	111	.000 (mmu)	N/A	N/A	N/A	Method	True	False	N/A	N/A	N/A			Pass	Pass	N/A	N/A	N/A	Confirmed	N/A
55	Processed	190419-055		Unknown		259									SCN-Bimane IS	T1C1	Internal Standard	812	2387	2.21	2.21	0.00		M+	N/A	N/A	N/A	N/A	126.1	126.1	-.002 (mmu)	N/A	N/A	N/A	Method	True	False	N/A	N/A	N/A			Pass	Pass	N/A	N/A	N/A	Confirmed	N/A
56	Processed	190419-056		Unknown		258									SCN-Bimane	T1	Target Compound	1504	3815	2.23	2.22	-0.01		M+	15.12	N/A	15.12	N/A	111	111	.000 (mmu)	0.724	1	5272	Method	True	False	N/A	N/A	N/A			Pass	Pass	N/A	N/A	N/A	Confirmed	N/A
56	Processed	190419-056		Unknown		258									SCN-Bimane	T1C1	Target Compound	661	1709	2.22	2.21	0.01		M+	N/A	N/A	N/A	N/A	124.1	124.1	-.002 (mmu)	0.724	N/A	N/A	Method	True	False	N/A	N/A	N/A			Pass	Pass	N/A	N/A	N/A	Confirmed	N/A
56	Processed	190419-056		Unknown		258									SCN-Bimane IS	T1	Internal Standard	1899	5272	2.24	2.21	-0.03		M+	1	1	1	N/A	111	111	.000 (mmu)	N/A	N/A	N/A	Method	True	False	N/A	N/A	N/A			Pass	Pass	N/A	N/A	N/A	Confirmed	N/A
56	Processed	190419-056		Unknown		258									SCN-Bimane IS	T1C1	Internal Standard	841	2499	2.21	2.21	0.00		M+	N/A	N/A	N/A	N/A	126.1	126.1	-.002 (mmu)	N/A	N/A	N/A	Method	True	False	N/A	N/A	N/A			Pass	Pass	N/A	N/A	N/A	Confirmed	N/A
57	Processed	190419-057		Unknown		257									SCN-Bimane	T1	Target Compound	1495	4528	2.23	2.22	-0.01		M+	16.254	N/A	16.254	N/A	111	111	.000 (mmu)	0.768	1	5893	Method	True	False	N/A	N/A	N/A			Pass	Pass	N/A	N/A	N/A	Confirmed	N/A
57	Processed	190419-057		Unknown		257									SCN-Bimane	T1C1	Target Compound	924	2207	2.22	2.21	0.00		M+	N/A	N/A	N/A	N/A	124.1	124.1	-.002 (mmu)	0.768	N/A	N/A	Method	True	False	N/A	N/A	N/A			Pass	Pass	N/A	N/A	N/A	Confirmed	N/A
57	Processed	190419-057		Unknown		257									SCN-Bimane IS	T1	Internal Standard	2134	5893	2.24	2.21	-0.03		M+	1	1	1	N/A	111	111	.000 (mmu)	N/A	N/A	N/A	Method	True	False	N/A	N/A	N/A			Pass	Pass	N/A	N/A	N/A	Confirmed	N/A
57	Processed	190419-057		Unknown		257									SCN-Bimane IS	T1C1	Internal Standard	949	2792	2.21	2.21	0.00		M+	N/A	N/A	N/A	N/A	126.1	126.1	-.002 (mmu)	N/A	N/A	N/A	Method	True	False	N/A	N/A	N/A			Pass	Pass	N/A	N/A	N/A	Confirmed	N/A
58	Processed	190419-058_20190423113952		Unknown		256									SCN-Bimane	T1	Target Compound	3297	8301	2.23	2.26	0.03		M+	24.568	N/A	24.568	N/A	111	111	.000 (mmu)	1.097	1	7570	Method	True	False	N/A	N/A	N/A			Pass	Pass	N/A	N/A	N/A	Confirmed	N/A
58	Processed	190419-058_20190423113952		Unknown		256									SCN-Bimane	T1C1	Target Compound	1799	4246	2.26	2.26	0.00		M+	N/A	N/A	N/A	N/A	124.1	124.1	-.002 (mmu)	1.097	N/A	N/A	Method	True	False	N/A	N/A	N/A			Pass	Pass	N/A	N/A	N/A	Confirmed	N/A
58	Processed	190419-058_20190423113952		Unknown		256									SCN-Bimane IS	T1	Internal Standard	3002	7570	2.24	2.26	0.02		M+	1	1	1	N/A	111	111	.000 (mmu)	N/A	N/A	N/A	Method	True	False	N/A	N/A	N/A			Pass	Pass	N/A	N/A	N/A	Confirmed	N/A
58	Processed	190419-058_20190423113952		Unknown		256									SCN-Bimane IS	T1C1	Internal Standard	1434	3723	2.26	2.26	0.00		M+	N/A	N/A	N/A	N/A	126.1	126.1	-.002 (mmu)	N/A	N/A	N/A	Method	True	False	N/A	N/A	N/A			Pass	Pass	N/A	N/A	N/A	Confirmed	N/A
59	Processed	190419-059_20190423122508		Unknown		255									SCN-Bimane	T1	Target Compound	3679	10141	2.23	2.26	0.03		M+	29.871	N/A	29.871	N/A	111	111	.000 (mmu)	1.306	1	7765	Method	True	False	N/A	N/A	N/A			Pass	Pass	N/A	N/A	N/A	Confirmed	N/A
59	Processed	190419-059_20190423122508		Unknown		255									SCN-Bimane	T1C1	Target Compound	1792	4733	2.26	2.26	0.00		M+	N/A	N/A	N/A	N/A	124.1	124.1	-.002 (mmu)	1.306	N/A	N/A	Method	True	False	N/A	N/A	N/A			Pass	Pass	N/A	N/A	N/A	Confirmed	N/A
59	Processed	190419-059_20190423122508		Unknown		255									SCN-Bimane IS	T1	Internal Standard	2916	7765	2.24	2.26	0.02		M+	1	1	1	N/A	111	111	.000 (mmu)	N/A	N/A	N/A	Method	True	False	N/A	N/A	N/A			Pass	Pass	N/A	N/A	N/A	Confirmed	N/A
59	Processed	190419-059_20190423122508		Unknown		255									SCN-Bimane IS	T1C1	Internal Standard	1478	3623	2.26	2.26	0.00		M+	N/A	N/A	N/A	N/A	126.1	126.1	-.002 (mmu)	N/A	N/A	N/A	Method	True	False	N/A	N/A	N/A			Pass	Pass	N/A	N/A	N/A	Confirmed	N/A
60	Processed	190419-060		Unknown		253									SCN-Bimane	T1	Target Compound	945	2744	2.23	2.21	-0.02		M+	10.61	N/A	10.61	N/A	111	111	.000 (mmu)	0.545	1	5031	Method	True	False	N/A	N/A	N/A			Pass	Pass	N/A	N/A	N/A	Confirmed	N/A
60	Processed	190419-060		Unknown		253									SCN-Bimane	T1C1	Target Compound	479	1162	2.21	2.22	0.00		M+	N/A	N/A	N/A	N/A	124.1	124.1	-.002 (mmu)	0.545	N/A	N/A	Method	True	False	N/A	N/A	N/A			Pass	Pass	N/A	N/A	N/A	Confirmed	N/A
60	Processed	190419-060		Unknown		253									SCN-Bimane IS	T1	Internal Standard	1895	5031	2.24	2.22	-0.02		M+	1	1	1	N/A	111	111	.000 (mmu)	N/A	N/A	N/A	Method	True	False	N/A	N/A	N/A			Pass	Pass	N/A	N/A	N/A	Confirmed	N/A
60	Processed	190419-060		Unknown		253									SCN-Bimane IS	T1C1	Internal Standard	878	2470	2.22	2.21	0.00		M+	N/A	N/A	N/A	N/A	126.1	126.1	-.002 (mmu)	N/A	N/A	N/A	Method	True	False	N/A	N/A	N/A			Pass	Pass	N/A	N/A	N/A	Confirmed	N/A
61	Processed	190419-061_20190423125130		Unknown		252									SCN-Bimane	T1	Target Compound	1324	3562	2.23	2.27	0.04		M+	28.378	N/A	28.378	N/A	111	111	.000 (mmu)	1.247	1	2857	Method	True	False	N/A	N/A	N/A			Pass	Pass	N/A	N/A	N/A	Confirmed	N/A
61	Processed	190419-061_20190423125130		Unknown		252									SCN-Bimane	T1C1	Target Compound	712	1705	2.27	2.26	0.01		M+	N/A	N/A	N/A	N/A	124.1	124.1	-.002 (mmu)	1.247	N/A	N/A	Method	True	False	N/A	N/A	N/A			Pass	Pass	N/A	N/A	N/A	Confirmed	N/A
61	Processed	190419-061_20190423125130		Unknown		252									SCN-Bimane IS	T1	Internal Standard	1075	2857	2.24	2.27	0.03		M+	1	1	1	N/A	111	111	.000 (mmu)	N/A	N/A	N/A	Method	True	False	N/A	N/A	N/A			Pass	Pass	N/A	N/A	N/A	Confirmed	N/A
61	Processed	190419-061_20190423125130		Unknown		252									SCN-Bimane IS	T1C1	Internal Standard	579	1163	2.27	2.27	0.01		M+	N/A	N/A	N/A	N/A	126.1	126.1	-.002 (mmu)	N/A	N/A	N/A	Method	True	False	N/A	N/A	N/A			Pass	Pass	N/A	N/A	N/A	Confirmed	N/A
62	Processed	190419-062		Unknown		251									SCN-Bimane	T1	Target Compound	1954	5502	2.23	2.21	-0.02		M+	21.711	N/A	21.711	N/A	111	111	.000 (mmu)	0.984	1	5592	Method	True	False	N/A	N/A	N/A			Pass	Pass	N/A	N/A	N/A	Confirmed	N/A
62	Processed	190419-062		Unknown		251									SCN-Bimane	T1C1	Target Compound	992	2520	2.21	2.21	0.00		M+	N/A	N/A	N/A	N/A	124.1	124.1	-.002 (mmu)	0.984	N/A	N/A	Method	True	False	N/A	N/A	N/A			Pass	Pass	N/A	N/A	N/A	Confirmed	N/A
62	Processed	190419-062		Unknown		251									SCN-Bimane IS	T1	Internal Standard	1996	5592	2.24	2.21	-0.03		M+	1	1	1	N/A	111	111	.000 (mmu)	N/A	N/A	N/A	Method	True	False	N/A	N/A	N/A			Pass	Pass	N/A	N/A	N/A	Confirmed	N/A
62	Processed	190419-062		Unknown		251									SCN-Bimane IS	T1C1	Internal Standard	946	2407	2.21	2.21	0.00		M+	N/A	N/A	N/A	N/A	126.1	126.1	-.002 (mmu)	N/A	N/A	N/A	Method	True	False	N/A	N/A	N/A			Pass	Pass	N/A	N/A	N/A	Confirmed	N/A
63	Processed	190419-063_20190423130228		Unknown		250									SCN-Bimane	T1	Target Compound	7373	19417	2.23	2.26	0.03		M+	79.873	N/A	79.873	N/A	111	111	.000 (mmu)	3.28	1	5919	Method	True	False	N/A	N/A	N/A			Pass	Pass	N/A	N/A	N/A	Confirmed	N/A
63	Processed	190419-063_20190423130228		Unknown		250									SCN-Bimane	T1C1	Target Compound	3267	8598	2.26	2.25	0.00		M+	N/A	N/A	N/A	N/A	124.1	124.1	-.002 (mmu)	3.28	N/A	N/A	Method	True	False	N/A	N/A	N/A			Pass	Pass	N/A	N/A	N/A	Confirmed	N/A
63	Processed	190419-063_20190423130228		Unknown		250									SCN-Bimane IS	T1	Internal Standard	2459	5919	2.24	2.25	0.01		M+	1	1	1	N/A	111	111	.000 (mmu)	N/A	N/A	N/A	Method	True	False	N/A	N/A	N/A			Pass	Pass	N/A	N/A	N/A	Confirmed	N/A
63	Processed	190419-063_20190423130228		Unknown		250									SCN-Bimane IS	T1C1	Internal Standard	1090	2806	2.25	2.26	-0.01		M+	N/A	N/A	N/A	N/A	126.1	126.1	-.002 (mmu)	N/A	N/A	N/A	Method	True	False	N/A	N/A	N/A			Pass	Pass	N/A	N/A	N/A	Confirmed	N/A
64	Processed	190419-064		Unknown		249									SCN-Bimane	T1	Target Compound	3190	9063	2.23	2.21	-0.02		M+	36.967	N/A	36.967	N/A	111	111	.000 (mmu)	1.586	1	5714	Method	True	False	N/A	N/A	N/A			Pass	Pass	N/A	N/A	N/A	Confirmed	N/A
64	Processed	190419-064		Unknown		249									SCN-Bimane	T1C1	Target Compound	1272	3986	2.21	2.22	-0.01		M+	N/A	N/A	N/A	N/A	124.1	124.1	-.002 (mmu)	1.586	N/A	N/A	Method	True	False	N/A	N/A	N/A			Pass	Pass	N/A	N/A	N/A	Confirmed	N/A
64	Processed	190419-064		Unknown		249									SCN-Bimane IS	T1	Internal Standard	2043	5714	2.24	2.21	-0.03		M+	1	1	1	N/A	111	111	.000 (mmu)	N/A	N/A	N/A	Method	True	False	N/A	N/A	N/A			Pass	Pass	N/A	N/A	N/A	Confirmed	N/A
64	Processed	190419-064		Unknown		249									SCN-Bimane IS	T1C1	Internal Standard	903	2507	2.21	2.21	0.00		M+	N/A	N/A	N/A	N/A	126.1	126.1	-.002 (mmu)	N/A	N/A	N/A	Method	True	False	N/A	N/A	N/A			Pass	Pass	N/A	N/A	N/A	Confirmed	N/A
65	Processed	190419-065		Unknown		248									SCN-Bimane	T1	Target Compound	3684	10670	2.23	2.21	-0.02		M+	49.663	N/A	49.663	N/A	111	111	.000 (mmu)	2.087	1	5112	Method	True	False	N/A	N/A	N/A			Pass	Pass	N/A	N/A	N/A	Confirmed	N/A
65	Processed	190419-065		Unknown		248									SCN-Bimane	T1C1	Target Compound	1827	5036	2.21	2.22	0.00		M+	N/A	N/A	N/A	N/A	124.1	124.1	-.002 (mmu)	2.087	N/A	N/A	Method	True	False	N/A	N/A	N/A			Pass	Pass	N/A	N/A	N/A	Confirmed	N/A
65	Processed	190419-065		Unknown		248									SCN-Bimane IS	T1	Internal Standard	1870	5112	2.24	2.22	-0.02		M+	1	1	1	N/A	111	111	.000 (mmu)	N/A	N/A	N/A	Method	True	False	N/A	N/A	N/A			Pass	Pass	N/A	N/A	N/A	Confirmed	N/A
65	Processed	190419-065		Unknown		248									SCN-Bimane IS	T1C1	Internal Standard	890	2446	2.22	2.21	0.01		M+	N/A	N/A	N/A	N/A	126.1	126.1	-.002 (mmu)	N/A	N/A	N/A	Method	True	False	N/A	N/A	N/A			Pass	Pass	N/A	N/A	N/A	Confirmed	N/A
66	Processed	190419-066		Unknown		247									SCN-Bimane	T1	Target Compound	2506	7277	2.23	2.21	-0.02		M+	30.757	N/A	30.757	N/A	111	111	.000 (mmu)	1.341	1	5427	Method	True	False	N/A	N/A	N/A			Pass	Pass	N/A	N/A	N/A	Confirmed	N/A
66	Processed	190419-066		Unknown		247									SCN-Bimane	T1C1	Target Compound	1152	3123	2.21	2.21	0.00		M+	N/A	N/A	N/A	N/A	124.1	124.1	-.002 (mmu)	1.341	N/A	N/A	Method	True	False	N/A	N/A	N/A			Pass	Pass	N/A	N/A	N/A	Confirmed	N/A
66	Processed	190419-066		Unknown		247									SCN-Bimane IS	T1	Internal Standard	1992	5427	2.24	2.21	-0.03		M+	1	1	1	N/A	111	111	.000 (mmu)	N/A	N/A	N/A	Method	True	False	N/A	N/A	N/A			Pass	Pass	N/A	N/A	N/A	Confirmed	N/A
66	Processed	190419-066		Unknown		247									SCN-Bimane IS	T1C1	Internal Standard	998	2539	2.21	2.21	0.00		M+	N/A	N/A	N/A	N/A	126.1	126.1	-.002 (mmu)	N/A	N/A	N/A	Method	True	False	N/A	N/A	N/A			Pass	Pass	N/A	N/A	N/A	Confirmed	N/A
67	Processed	190419-067		Unknown		246									SCN-Bimane	T1	Target Compound	2783	8103	2.23	2.22	-0.01		M+	29.241	N/A	29.241	N/A	111	111	.000 (mmu)	1.281	1	6325	Method	True	False	N/A	N/A	N/A			Pass	Pass	N/A	N/A	N/A	Confirmed	N/A
67	Processed	190419-067		Unknown		246									SCN-Bimane	T1C1	Target Compound	1437	4019	2.22	2.21	0.01		M+	N/A	N/A	N/A	N/A	124.1	124.1	-.002 (mmu)	1.281	N/A	N/A	Method	True	False	N/A	N/A	N/A			Pass	Pass	N/A	N/A	N/A	Confirmed	N/A
67	Processed	190419-067		Unknown		246									SCN-Bimane IS	T1	Internal Standard	2110	6325	2.24	2.21	-0.03		M+	1	1	1	N/A	111	111	.000 (mmu)	N/A	N/A	N/A	Method	True	False	N/A	N/A	N/A			Pass	Pass	N/A	N/A	N/A	Confirmed	N/A
67	Processed	190419-067		Unknown		246									SCN-Bimane IS	T1C1	Internal Standard	1062	3011	2.21	2.21	0.00		M+	N/A	N/A	N/A	N/A	126.1	126.1	-.002 (mmu)	N/A	N/A	N/A	Method	True	False	N/A	N/A	N/A			Pass	Pass	N/A	N/A	N/A	Confirmed	N/A
68	Processed	190419-068		Unknown		245									SCN-Bimane	T1	Target Compound	3133	8619	2.23	2.22	-0.01		M+	27.725	N/A	27.725	N/A	111	111	.000 (mmu)	1.221	1	7058	Method	True	False	N/A	N/A	N/A			Pass	Pass	N/A	N/A	N/A	Confirmed	N/A
68	Processed	190419-068		Unknown		245									SCN-Bimane	T1C1	Target Compound	1269	3743	2.22	2.22	0.00		M+	N/A	N/A	N/A	N/A	124.1	124.1	-.002 (mmu)	1.221	N/A	N/A	Method	True	False	N/A	N/A	N/A			Pass	Pass	N/A	N/A	N/A	Confirmed	N/A
68	Processed	190419-068		Unknown		245									SCN-Bimane IS	T1	Internal Standard	2726	7058	2.24	2.22	-0.02		M+	1	1	1	N/A	111	111	.000 (mmu)	N/A	N/A	N/A	Method	True	False	N/A	N/A	N/A			Pass	Pass	N/A	N/A	N/A	Confirmed	N/A
68	Processed	190419-068		Unknown		245									SCN-Bimane IS	T1C1	Internal Standard	1049	3148	2.22	2.21	0.01		M+	N/A	N/A	N/A	N/A	126.1	126.1	-.002 (mmu)	N/A	N/A	N/A	Method	True	False	N/A	N/A	N/A			Pass	Pass	N/A	N/A	N/A	Confirmed	N/A
69	Processed	190419-069		Unknown		244									SCN-Bimane	T1	Target Compound	2925	8073	2.23	2.21	-0.02		M+	31.592	N/A	31.592	N/A	111	111	.000 (mmu)	1.374	1	5876	Method	True	False	N/A	N/A	N/A			Pass	Pass	N/A	N/A	N/A	Confirmed	N/A
69	Processed	190419-069		Unknown		244									SCN-Bimane	T1C1	Target Compound	1234	3521	2.21	2.22	-0.01		M+	N/A	N/A	N/A	N/A	124.1	124.1	-.002 (mmu)	1.374	N/A	N/A	Method	True	False	N/A	N/A	N/A			Pass	Pass	N/A	N/A	N/A	Confirmed	N/A
69	Processed	190419-069		Unknown		244									SCN-Bimane IS	T1	Internal Standard	2252	5876	2.24	2.21	-0.03		M+	1	1	1	N/A	111	111	.000 (mmu)	N/A	N/A	N/A	Method	True	False	N/A	N/A	N/A			Pass	Pass	N/A	N/A	N/A	Confirmed	N/A
69	Processed	190419-069		Unknown		244									SCN-Bimane IS	T1C1	Internal Standard	1146	2777	2.21	2.21	0.00		M+	N/A	N/A	N/A	N/A	126.1	126.1	-.002 (mmu)	N/A	N/A	N/A	Method	True	False	N/A	N/A	N/A			Pass	Pass	N/A	N/A	N/A	Confirmed	N/A
70	Processed	190419-070		Unknown		243									SCN-Bimane	T1	Target Compound	2528	6783	2.23	2.21	-0.02		M+	27.176	N/A	27.176	N/A	111	111	.000 (mmu)	1.2	1	5655	Method	True	False	N/A	N/A	N/A			Pass	Pass	N/A	N/A	N/A	Confirmed	N/A
70	Processed	190419-070		Unknown		243									SCN-Bimane	T1C1	Target Compound	1023	3134	2.21	2.21	0.00		M+	N/A	N/A	N/A	N/A	124.1	124.1	-.002 (mmu)	1.2	N/A	N/A	Method	True	False	N/A	N/A	N/A			Pass	Pass	N/A	N/A	N/A	Confirmed	N/A
70	Processed	190419-070		Unknown		243									SCN-Bimane IS	T1	Internal Standard	1825	5655	2.24	2.21	-0.03		M+	1	1	1	N/A	111	111	.000 (mmu)	N/A	N/A	N/A	Method	True	False	N/A	N/A	N/A			Pass	Pass	N/A	N/A	N/A	Confirmed	N/A
70	Processed	190419-070		Unknown		243									SCN-Bimane IS	T1C1	Internal Standard	914	2457	2.21	2.21	0.00		M+	N/A	N/A	N/A	N/A	126.1	126.1	-.002 (mmu)	N/A	N/A	N/A	Method	True	False	N/A	N/A	N/A			Pass	Pass	N/A	N/A	N/A	Confirmed	N/A
71	Processed	190419-071		Unknown		242									SCN-Bimane	T1	Target Compound	2876	7914	2.23	2.22	-0.01		M+	31.477	N/A	31.477	N/A	111	111	.000 (mmu)	1.369	1	5779	Method	True	False	N/A	N/A	N/A			Pass	Pass	N/A	N/A	N/A	Confirmed	N/A
71	Processed	190419-071		Unknown		242									SCN-Bimane	T1C1	Target Compound	1424	3703	2.22	2.21	0.00		M+	N/A	N/A	N/A	N/A	124.1	124.1	-.002 (mmu)	1.369	N/A	N/A	Method	True	False	N/A	N/A	N/A			Pass	Pass	N/A	N/A	N/A	Confirmed	N/A
71	Processed	190419-071		Unknown		242									SCN-Bimane IS	T1	Internal Standard	2203	5779	2.24	2.21	-0.03		M+	1	1	1	N/A	111	111	.000 (mmu)	N/A	N/A	N/A	Method	True	False	N/A	N/A	N/A			Pass	Pass	N/A	N/A	N/A	Confirmed	N/A
71	Processed	190419-071		Unknown		242									SCN-Bimane IS	T1C1	Internal Standard	971	2695	2.21	2.21	0.00		M+	N/A	N/A	N/A	N/A	126.1	126.1	-.002 (mmu)	N/A	N/A	N/A	Method	True	False	N/A	N/A	N/A			Pass	Pass	N/A	N/A	N/A	Confirmed	N/A
72	Processed	190419-072		Unknown		241									SCN-Bimane	T1	Target Compound	5656	15246	2.23	2.22	-0.01		M+	62.216	N/A	62.216	N/A	111	111	.000 (mmu)	2.583	1	5902	Method	True	False	N/A	N/A	N/A			Pass	Pass	N/A	N/A	N/A	Confirmed	N/A
72	Processed	190419-072		Unknown		241									SCN-Bimane	T1C1	Target Compound	2526	6796	2.22	2.22	0.00		M+	N/A	N/A	N/A	N/A	124.1	124.1	-.002 (mmu)	2.583	N/A	N/A	Method	True	False	N/A	N/A	N/A			Pass	Pass	N/A	N/A	N/A	Confirmed	N/A
72	Processed	190419-072		Unknown		241									SCN-Bimane IS	T1	Internal Standard	2173	5902	2.24	2.22	-0.02		M+	1	1	1	N/A	111	111	.000 (mmu)	N/A	N/A	N/A	Method	True	False	N/A	N/A	N/A			Pass	Pass	N/A	N/A	N/A	Confirmed	N/A
72	Processed	190419-072		Unknown		241									SCN-Bimane IS	T1C1	Internal Standard	1035	2729	2.22	2.21	0.01		M+	N/A	N/A	N/A	N/A	126.1	126.1	-.002 (mmu)	N/A	N/A	N/A	Method	True	False	N/A	N/A	N/A			Pass	Pass	N/A	N/A	N/A	Confirmed	N/A
73	Processed	190419-073		Unknown		240									SCN-Bimane	T1	Target Compound	6919	18532	2.23	2.21	-0.02		M+	77.468	N/A	77.468	N/A	111	111	.000 (mmu)	3.185	1	5818	Method	True	False	N/A	N/A	N/A			Pass	Pass	N/A	N/A	N/A	Confirmed	N/A
73	Processed	190419-073		Unknown		240									SCN-Bimane	T1C1	Target Compound	2905	8512	2.21	2.21	-0.01		M+	N/A	N/A	N/A	N/A	124.1	124.1	-.002 (mmu)	3.185	N/A	N/A	Method	True	False	N/A	N/A	N/A			Pass	Pass	N/A	N/A	N/A	Confirmed	N/A
73	Processed	190419-073		Unknown		240									SCN-Bimane IS	T1	Internal Standard	1845	5818	2.24	2.22	-0.02		M+	1	1	1	N/A	111	111	.000 (mmu)	N/A	N/A	N/A	Method	True	False	N/A	N/A	N/A			Pass	Pass	N/A	N/A	N/A	Confirmed	N/A
73	Processed	190419-073		Unknown		240									SCN-Bimane IS	T1C1	Internal Standard	1005	2737	2.22	2.21	0.01		M+	N/A	N/A	N/A	N/A	126.1	126.1	-.002 (mmu)	N/A	N/A	N/A	Method	True	False	N/A	N/A	N/A			Pass	Pass	N/A	N/A	N/A	Confirmed	N/A
74	Processed	190419-074		Unknown		239									SCN-Bimane	T1	Target Compound	3469	9934	2.23	2.22	-0.01		M+	39.588	N/A	39.588	N/A	111	111	.000 (mmu)	1.69	1	5880	Method	True	False	N/A	N/A	N/A			Pass	Pass	N/A	N/A	N/A	Confirmed	N/A
74	Processed	190419-074		Unknown		239									SCN-Bimane	T1C1	Target Compound	1467	4730	2.22	2.21	0.00		M+	N/A	N/A	N/A	N/A	124.1	124.1	-.002 (mmu)	1.69	N/A	N/A	Method	True	False	N/A	N/A	N/A			Pass	Pass	N/A	N/A	N/A	Confirmed	N/A
74	Processed	190419-074		Unknown		239									SCN-Bimane IS	T1	Internal Standard	2179	5880	2.24	2.22	-0.02		M+	1	1	1	N/A	111	111	.000 (mmu)	N/A	N/A	N/A	Method	True	False	N/A	N/A	N/A			Pass	Pass	N/A	N/A	N/A	Confirmed	N/A
74	Processed	190419-074		Unknown		239									SCN-Bimane IS	T1C1	Internal Standard	971	2686	2.22	2.22	0.00		M+	N/A	N/A	N/A	N/A	126.1	126.1	-.002 (mmu)	N/A	N/A	N/A	Method	True	False	N/A	N/A	N/A			Pass	Pass	N/A	N/A	N/A	Confirmed	N/A
75	Processed	190419-075		Unknown		238									SCN-Bimane	T1	Target Compound	2702	7315	2.23	2.21	-0.02		M+	31.81	N/A	31.81	N/A	111	111	.000 (mmu)	1.383	1	5291	Method	True	False	N/A	N/A	N/A			Pass	Pass	N/A	N/A	N/A	Confirmed	N/A
75	Processed	190419-075		Unknown		238									SCN-Bimane	T1C1	Target Compound	1258	3399	2.21	2.21	0.00		M+	N/A	N/A	N/A	N/A	124.1	124.1	-.002 (mmu)	1.383	N/A	N/A	Method	True	False	N/A	N/A	N/A			Pass	Pass	N/A	N/A	N/A	Confirmed	N/A
75	Processed	190419-075		Unknown		238									SCN-Bimane IS	T1	Internal Standard	1935	5291	2.24	2.21	-0.03		M+	1	1	1	N/A	111	111	.000 (mmu)	N/A	N/A	N/A	Method	True	False	N/A	N/A	N/A			Pass	Pass	N/A	N/A	N/A	Confirmed	N/A
75	Processed	190419-075		Unknown		238									SCN-Bimane IS	T1C1	Internal Standard	877	2589	2.21	2.21	0.01		M+	N/A	N/A	N/A	N/A	126.1	126.1	-.002 (mmu)	N/A	N/A	N/A	Method	True	False	N/A	N/A	N/A			Pass	Pass	N/A	N/A	N/A	Confirmed	N/A
76	Processed	190419-076_20190423131808		Unknown		237									SCN-Bimane	T1	Target Compound	3489	9231	2.23	2.26	0.03		M+	34.394	N/A	34.394	N/A	111	111	.000 (mmu)	1.485	1	6218	Method	True	False	N/A	N/A	N/A			Pass	Pass	N/A	N/A	N/A	Confirmed	N/A
76	Processed	190419-076_20190423131808		Unknown		237									SCN-Bimane	T1C1	Target Compound	1500	4263	2.26	2.26	0.00		M+	N/A	N/A	N/A	N/A	124.1	124.1	-.002 (mmu)	1.485	N/A	N/A	Method	True	False	N/A	N/A	N/A			Pass	Pass	N/A	N/A	N/A	Confirmed	N/A
76	Processed	190419-076_20190423131808		Unknown		237									SCN-Bimane IS	T1	Internal Standard	2224	6218	2.24	2.27	0.03		M+	1	1	1	N/A	111	111	.000 (mmu)	N/A	N/A	N/A	Method	True	False	N/A	N/A	N/A			Pass	Pass	N/A	N/A	N/A	Confirmed	N/A
76	Processed	190419-076_20190423131808		Unknown		237									SCN-Bimane IS	T1C1	Internal Standard	1111	3162	2.27	2.26	0.01		M+	N/A	N/A	N/A	N/A	126.1	126.1	-.002 (mmu)	N/A	N/A	N/A	Method	True	False	N/A	N/A	N/A			Pass	Pass	N/A	N/A	N/A	Confirmed	N/A
77	Processed	190419-077		Unknown		236									SCN-Bimane	T1	Target Compound	2831	7756	2.23	2.21	-0.02		M+	34.857	N/A	34.857	N/A	111	111	.000 (mmu)	1.503	1	5161	Method	True	False	N/A	N/A	N/A			Pass	Pass	N/A	N/A	N/A	Confirmed	N/A
77	Processed	190419-077		Unknown		236									SCN-Bimane	T1C1	Target Compound	1401	3690	2.21	2.21	0.00		M+	N/A	N/A	N/A	N/A	124.1	124.1	-.002 (mmu)	1.503	N/A	N/A	Method	True	False	N/A	N/A	N/A			Pass	Pass	N/A	N/A	N/A	Confirmed	N/A
77	Processed	190419-077		Unknown		236									SCN-Bimane IS	T1	Internal Standard	1863	5161	2.24	2.21	-0.03		M+	1	1	1	N/A	111	111	.000 (mmu)	N/A	N/A	N/A	Method	True	False	N/A	N/A	N/A			Pass	Pass	N/A	N/A	N/A	Confirmed	N/A
77	Processed	190419-077		Unknown		236									SCN-Bimane IS	T1C1	Internal Standard	941	2470	2.21	2.21	0.01		M+	N/A	N/A	N/A	N/A	126.1	126.1	-.002 (mmu)	N/A	N/A	N/A	Method	True	False	N/A	N/A	N/A			Pass	Pass	N/A	N/A	N/A	Confirmed	N/A
78	Processed	190419-078		Unknown		235									SCN-Bimane	T1	Target Compound	3378	9627	2.23	2.21	-0.02		M+	41.043	N/A	41.043	N/A	111	111	.000 (mmu)	1.747	1	5511	Method	True	False	N/A	N/A	N/A			Pass	Pass	N/A	N/A	N/A	Confirmed	N/A
78	Processed	190419-078		Unknown		235									SCN-Bimane	T1C1	Target Compound	1608	4525	2.21	2.21	0.00		M+	N/A	N/A	N/A	N/A	124.1	124.1	-.002 (mmu)	1.747	N/A	N/A	Method	True	False	N/A	N/A	N/A			Pass	Pass	N/A	N/A	N/A	Confirmed	N/A
78	Processed	190419-078		Unknown		235									SCN-Bimane IS	T1	Internal Standard	2082	5511	2.24	2.21	-0.03		M+	1	1	1	N/A	111	111	.000 (mmu)	N/A	N/A	N/A	Method	True	False	N/A	N/A	N/A			Pass	Pass	N/A	N/A	N/A	Confirmed	N/A
78	Processed	190419-078		Unknown		235									SCN-Bimane IS	T1C1	Internal Standard	842	2366	2.21	2.22	-0.01		M+	N/A	N/A	N/A	N/A	126.1	126.1	-.002 (mmu)	N/A	N/A	N/A	Method	True	False	N/A	N/A	N/A			Pass	Pass	N/A	N/A	N/A	Confirmed	N/A
79	Processed	190419-079		Unknown		234									SCN-Bimane	T1	Target Compound	4388	12347	2.23	2.22	-0.01		M+	50.793	N/A	50.793	N/A	111	111	.000 (mmu)	2.132	1	5791	Method	True	False	N/A	N/A	N/A			Pass	Pass	N/A	N/A	N/A	Confirmed	N/A
79	Processed	190419-079		Unknown		234									SCN-Bimane	T1C1	Target Compound	2228	5846	2.22	2.21	0.00		M+	N/A	N/A	N/A	N/A	124.1	124.1	-.002 (mmu)	2.132	N/A	N/A	Method	True	False	N/A	N/A	N/A			Pass	Pass	N/A	N/A	N/A	Confirmed	N/A
79	Processed	190419-079		Unknown		234									SCN-Bimane IS	T1	Internal Standard	2031	5791	2.24	2.22	-0.02		M+	1	1	1	N/A	111	111	.000 (mmu)	N/A	N/A	N/A	Method	True	False	N/A	N/A	N/A			Pass	Pass	N/A	N/A	N/A	Confirmed	N/A
79	Processed	190419-079		Unknown		234									SCN-Bimane IS	T1C1	Internal Standard	967	2776	2.22	2.22	0.00		M+	N/A	N/A	N/A	N/A	126.1	126.1	-.002 (mmu)	N/A	N/A	N/A	Method	True	False	N/A	N/A	N/A			Pass	Pass	N/A	N/A	N/A	Confirmed	N/A
80	Processed	190419-080		Unknown		233									SCN-Bimane	T1	Target Compound	4184	11986	2.23	2.22	-0.01		M+	49.641	N/A	49.641	N/A	111	111	.000 (mmu)	2.087	1	5745	Method	True	False	N/A	N/A	N/A			Pass	Pass	N/A	N/A	N/A	Confirmed	N/A
80	Processed	190419-080		Unknown		233									SCN-Bimane	T1C1	Target Compound	2037	5550	2.22	2.21	0.00		M+	N/A	N/A	N/A	N/A	124.1	124.1	-.002 (mmu)	2.087	N/A	N/A	Method	True	False	N/A	N/A	N/A			Pass	Pass	N/A	N/A	N/A	Confirmed	N/A
80	Processed	190419-080		Unknown		233									SCN-Bimane IS	T1	Internal Standard	2179	5745	2.24	2.21	-0.03		M+	1	1	1	N/A	111	111	.000 (mmu)	N/A	N/A	N/A	Method	True	False	N/A	N/A	N/A			Pass	Pass	N/A	N/A	N/A	Confirmed	N/A
80	Processed	190419-080		Unknown		233									SCN-Bimane IS	T1C1	Internal Standard	990	2559	2.21	2.22	0.00		M+	N/A	N/A	N/A	N/A	126.1	126.1	-.002 (mmu)	N/A	N/A	N/A	Method	True	False	N/A	N/A	N/A			Pass	Pass	N/A	N/A	N/A	Confirmed	N/A
81	Processed	190419-081		Unknown		232									SCN-Bimane	T1	Target Compound	4396	12418	2.23	2.21	-0.02		M+	54.108	N/A	54.108	N/A	111	111	.000 (mmu)	2.263	1	5488	Method	True	False	N/A	N/A	N/A			Pass	Pass	N/A	N/A	N/A	Confirmed	N/A
81	Processed	190419-081		Unknown		232									SCN-Bimane	T1C1	Target Compound	2019	5448	2.21	2.21	0.00		M+	N/A	N/A	N/A	N/A	124.1	124.1	-.002 (mmu)	2.263	N/A	N/A	Method	True	False	N/A	N/A	N/A			Pass	Pass	N/A	N/A	N/A	Confirmed	N/A
81	Processed	190419-081		Unknown		232									SCN-Bimane IS	T1	Internal Standard	2068	5488	2.24	2.21	-0.03		M+	1	1	1	N/A	111	111	.000 (mmu)	N/A	N/A	N/A	Method	True	False	N/A	N/A	N/A			Pass	Pass	N/A	N/A	N/A	Confirmed	N/A
81	Processed	190419-081		Unknown		232									SCN-Bimane IS	T1C1	Internal Standard	938	2537	2.21	2.21	0.01		M+	N/A	N/A	N/A	N/A	126.1	126.1	-.002 (mmu)	N/A	N/A	N/A	Method	True	False	N/A	N/A	N/A			Pass	Pass	N/A	N/A	N/A	Confirmed	N/A
82	Processed	190419-082		Unknown		231									SCN-Bimane	T1	Target Compound	9211	26174	2.23	2.21	-0.02		M+	109.681	N/A	109.681	N/A	111	111	.000 (mmu)	4.457	1	5872	Method	True	False	N/A	N/A	N/A			Pass	Pass	N/A	N/A	N/A	Confirmed	N/A
82	Processed	190419-082		Unknown		231									SCN-Bimane	T1C1	Target Compound	4367	11682	2.21	2.21	0.00		M+	N/A	N/A	N/A	N/A	124.1	124.1	-.002 (mmu)	4.457	N/A	N/A	Method	True	False	N/A	N/A	N/A			Pass	Pass	N/A	N/A	N/A	Confirmed	N/A
82	Processed	190419-082		Unknown		231									SCN-Bimane IS	T1	Internal Standard	2082	5872	2.24	2.21	-0.03		M+	1	1	1	N/A	111	111	.000 (mmu)	N/A	N/A	N/A	Method	True	False	N/A	N/A	N/A			Pass	Pass	N/A	N/A	N/A	Confirmed	N/A
82	Processed	190419-082		Unknown		231									SCN-Bimane IS	T1C1	Internal Standard	1053	2939	2.21	2.21	0.00		M+	N/A	N/A	N/A	N/A	126.1	126.1	-.002 (mmu)	N/A	N/A	N/A	Method	True	False	N/A	N/A	N/A			Pass	Pass	N/A	N/A	N/A	Confirmed	N/A
83	Processed	190419-083		Unknown		230									SCN-Bimane	T1	Target Compound	7149	18002	2.23	2.21	-0.02		M+	92.439	N/A	92.439	N/A	111	111	.000 (mmu)	3.776	1	4767	Method	True	False	N/A	N/A	N/A			Pass	Pass	N/A	N/A	N/A	Confirmed	N/A
83	Processed	190419-083		Unknown		230									SCN-Bimane	T1C1	Target Compound	2868	8146	2.21	2.21	0.00		M+	N/A	N/A	N/A	N/A	124.1	124.1	-.002 (mmu)	3.776	N/A	N/A	Method	True	False	N/A	N/A	N/A			Pass	Pass	N/A	N/A	N/A	Confirmed	N/A
83	Processed	190419-083		Unknown		230									SCN-Bimane IS	T1	Internal Standard	1941	4767	2.24	2.21	-0.03		M+	1	1	1	N/A	111	111	.000 (mmu)	N/A	N/A	N/A	Method	True	False	N/A	N/A	N/A			Pass	Pass	N/A	N/A	N/A	Confirmed	N/A
83	Processed	190419-083		Unknown		230									SCN-Bimane IS	T1C1	Internal Standard	951	2381	2.21	2.21	0.00		M+	N/A	N/A	N/A	N/A	126.1	126.1	-.002 (mmu)	N/A	N/A	N/A	Method	True	False	N/A	N/A	N/A			Pass	Pass	N/A	N/A	N/A	Confirmed	N/A
84	Processed	190419-084		Unknown		229									SCN-Bimane	T1	Target Compound	8049	21412	2.23	2.21	-0.02		M+	87.614	N/A	87.614	N/A	111	111	.000 (mmu)	3.586	1	5971	Method	True	False	N/A	N/A	N/A			Pass	Pass	N/A	N/A	N/A	Confirmed	N/A
84	Processed	190419-084		Unknown		229									SCN-Bimane	T1C1	Target Compound	3408	9921	2.21	2.21	0.00		M+	N/A	N/A	N/A	N/A	124.1	124.1	-.002 (mmu)	3.586	N/A	N/A	Method	True	False	N/A	N/A	N/A			Pass	Pass	N/A	N/A	N/A	Confirmed	N/A
84	Processed	190419-084		Unknown		229									SCN-Bimane IS	T1	Internal Standard	2165	5971	2.24	2.21	-0.03		M+	1	1	1	N/A	111	111	.000 (mmu)	N/A	N/A	N/A	Method	True	False	N/A	N/A	N/A			Pass	Pass	N/A	N/A	N/A	Confirmed	N/A
84	Processed	190419-084		Unknown		229									SCN-Bimane IS	T1C1	Internal Standard	1028	2738	2.21	2.21	0.00		M+	N/A	N/A	N/A	N/A	126.1	126.1	-.002 (mmu)	N/A	N/A	N/A	Method	True	False	N/A	N/A	N/A			Pass	Pass	N/A	N/A	N/A	Confirmed	N/A
85	Processed	190419-085		Unknown		228									SCN-Bimane	T1	Target Compound	8085	22457	2.23	2.21	-0.02		M+	83.931	N/A	83.931	N/A	111	111	.000 (mmu)	3.44	1	6527	Method	True	False	N/A	N/A	N/A			Pass	Pass	N/A	N/A	N/A	Confirmed	N/A
85	Processed	190419-085		Unknown		228									SCN-Bimane	T1C1	Target Compound	3700	9716	2.21	2.21	0.00		M+	N/A	N/A	N/A	N/A	124.1	124.1	-.002 (mmu)	3.44	N/A	N/A	Method	True	False	N/A	N/A	N/A			Pass	Pass	N/A	N/A	N/A	Confirmed	N/A
85	Processed	190419-085		Unknown		228									SCN-Bimane IS	T1	Internal Standard	2322	6527	2.24	2.21	-0.03		M+	1	1	1	N/A	111	111	.000 (mmu)	N/A	N/A	N/A	Method	True	False	N/A	N/A	N/A			Pass	Pass	N/A	N/A	N/A	Confirmed	N/A
85	Processed	190419-085		Unknown		228									SCN-Bimane IS	T1C1	Internal Standard	1126	2937	2.21	2.21	0.00		M+	N/A	N/A	N/A	N/A	126.1	126.1	-.002 (mmu)	N/A	N/A	N/A	Method	True	False	N/A	N/A	N/A			Pass	Pass	N/A	N/A	N/A	Confirmed	N/A
86	Processed	190419-086_20190423132916		Unknown		227									SCN-Bimane	T1	Target Compound	5647	15551	2.23	2.26	0.03		M+	79.226	N/A	79.226	N/A	111	111	.000 (mmu)	3.255	1	4778	Method	True	False	N/A	N/A	N/A			Pass	Pass	N/A	N/A	N/A	Confirmed	N/A
86	Processed	190419-086_20190423132916		Unknown		227									SCN-Bimane	T1C1	Target Compound	2698	6791	2.26	2.26	0.00		M+	N/A	N/A	N/A	N/A	124.1	124.1	-.002 (mmu)	3.255	N/A	N/A	Method	True	False	N/A	N/A	N/A			Pass	Pass	N/A	N/A	N/A	Confirmed	N/A
86	Processed	190419-086_20190423132916		Unknown		227									SCN-Bimane IS	T1	Internal Standard	1878	4778	2.24	2.26	0.02		M+	1	1	1	N/A	111	111	.000 (mmu)	N/A	N/A	N/A	Method	True	False	N/A	N/A	N/A			Pass	Pass	N/A	N/A	N/A	Confirmed	N/A
86	Processed	190419-086_20190423132916		Unknown		227									SCN-Bimane IS	T1C1	Internal Standard	796	2182	2.26	2.26	0.00		M+	N/A	N/A	N/A	N/A	126.1	126.1	-.002 (mmu)	N/A	N/A	N/A	Method	True	False	N/A	N/A	N/A			Pass	Pass	N/A	N/A	N/A	Confirmed	N/A
87	Processed	190419-087		Unknown		226									SCN-Bimane	T1	Target Compound	9805	25506	2.23	2.22	-0.01		M+	84.056	N/A	84.056	N/A	111	111	.000 (mmu)	3.445	1	7403	Method	True	False	N/A	N/A	N/A			Pass	Pass	N/A	N/A	N/A	Confirmed	N/A
87	Processed	190419-087		Unknown		226									SCN-Bimane	T1C1	Target Compound	4090	11800	2.22	2.22	0.00		M+	N/A	N/A	N/A	N/A	124.1	124.1	-.002 (mmu)	3.445	N/A	N/A	Method	True	False	N/A	N/A	N/A			Pass	Pass	N/A	N/A	N/A	Confirmed	N/A
87	Processed	190419-087		Unknown		226									SCN-Bimane IS	T1	Internal Standard	2592	7403	2.24	2.22	-0.02		M+	1	1	1	N/A	111	111	.000 (mmu)	N/A	N/A	N/A	Method	True	False	N/A	N/A	N/A			Pass	Pass	N/A	N/A	N/A	Confirmed	N/A
87	Processed	190419-087		Unknown		226									SCN-Bimane IS	T1C1	Internal Standard	1195	3532	2.22	2.22	0.00		M+	N/A	N/A	N/A	N/A	126.1	126.1	-.002 (mmu)	N/A	N/A	N/A	Method	True	False	N/A	N/A	N/A			Pass	Pass	N/A	N/A	N/A	Confirmed	N/A
88	Processed	190419-088_20190423133958		Unknown		225									SCN-Bimane	T1	Target Compound	9166	23660	2.23	2.26	0.03		M+	73.481	N/A	73.481	N/A	111	111	.000 (mmu)	3.028	1	7814	Method	True	False	N/A	N/A	N/A			Pass	Pass	N/A	N/A	N/A	Confirmed	N/A
88	Processed	190419-088_20190423133958		Unknown		225									SCN-Bimane	T1C1	Target Compound	4584	11077	2.26	2.25	0.00		M+	N/A	N/A	N/A	N/A	124.1	124.1	-.002 (mmu)	3.028	N/A	N/A	Method	True	False	N/A	N/A	N/A			Pass	Pass	N/A	N/A	N/A	Confirmed	N/A
88	Processed	190419-088_20190423133958		Unknown		225									SCN-Bimane IS	T1	Internal Standard	2972	7814	2.24	2.25	0.01		M+	1	1	1	N/A	111	111	.000 (mmu)	N/A	N/A	N/A	Method	True	False	N/A	N/A	N/A			Pass	Pass	N/A	N/A	N/A	Confirmed	N/A
88	Processed	190419-088_20190423133958		Unknown		225									SCN-Bimane IS	T1C1	Internal Standard	1516	3461	2.25	2.26	0.00		M+	N/A	N/A	N/A	N/A	126.1	126.1	-.002 (mmu)	N/A	N/A	N/A	Method	True	False	N/A	N/A	N/A			Pass	Pass	N/A	N/A	N/A	Confirmed	N/A
89	Processed	190419-089		Unknown		224									SCN-Bimane	T1	Target Compound	4769	13131	2.23	2.21	-0.02		M+	84.961	N/A	84.961	N/A	111	111	.000 (mmu)	3.481	1	3772	Method	True	False	N/A	N/A	N/A			Pass	Pass	N/A	N/A	N/A	Confirmed	N/A
89	Processed	190419-089		Unknown		224									SCN-Bimane	T1C1	Target Compound	2214	6632	2.21	2.21	0.00		M+	N/A	N/A	N/A	N/A	124.1	124.1	-.002 (mmu)	3.481	N/A	N/A	Method	True	False	N/A	N/A	N/A			Pass	Pass	N/A	N/A	N/A	Confirmed	N/A
89	Processed	190419-089		Unknown		224									SCN-Bimane IS	T1	Internal Standard	1313	3772	2.24	2.22	-0.02		M+	1	1	1	N/A	111	111	.000 (mmu)	N/A	N/A	N/A	Method	True	False	N/A	N/A	N/A			Pass	Pass	N/A	N/A	N/A	Confirmed	N/A
89	Processed	190419-089		Unknown		224									SCN-Bimane IS	T1C1	Internal Standard	711	1688	2.22	2.22	0.00		M+	N/A	N/A	N/A	N/A	126.1	126.1	-.002 (mmu)	N/A	N/A	N/A	Method	True	False	N/A	N/A	N/A			Pass	Pass	N/A	N/A	N/A	Confirmed	N/A
90	Processed	190419-090_20190423135210		Unknown		223									SCN-Bimane	T1	Target Compound	6837	18336	2.23	2.26	0.03		M+	58.817	N/A	58.817	N/A	111	111	.000 (mmu)	2.449	1	7488	Method	True	False	N/A	N/A	N/A			Pass	Pass	N/A	N/A	N/A	Confirmed	N/A
90	Processed	190419-090_20190423135210		Unknown		223									SCN-Bimane	T1C1	Target Compound	3392	8530	2.26	2.26	0.00		M+	N/A	N/A	N/A	N/A	124.1	124.1	-.002 (mmu)	2.449	N/A	N/A	Method	True	False	N/A	N/A	N/A			Pass	Pass	N/A	N/A	N/A	Confirmed	N/A
90	Processed	190419-090_20190423135210		Unknown		223									SCN-Bimane IS	T1	Internal Standard	2837	7488	2.24	2.27	0.03		M+	1	1	1	N/A	111	111	.000 (mmu)	N/A	N/A	N/A	Method	True	False	N/A	N/A	N/A			Pass	Pass	N/A	N/A	N/A	Confirmed	N/A
90	Processed	190419-090_20190423135210		Unknown		223									SCN-Bimane IS	T1C1	Internal Standard	1198	3283	2.27	2.27	0.00		M+	N/A	N/A	N/A	N/A	126.1	126.1	-.002 (mmu)	N/A	N/A	N/A	Method	True	False	N/A	N/A	N/A			Pass	Pass	N/A	N/A	N/A	Confirmed	N/A
91	Processed	190419-091		Unknown		222									SCN-Bimane	T1	Target Compound	2327	6772	2.23	2.22	-0.01		M+	48.136	N/A	48.136	N/A	111	111	.000 (mmu)	2.027	1	3341	Method	True	False	N/A	N/A	N/A			Pass	Pass	N/A	N/A	N/A	Confirmed	N/A
91	Processed	190419-091		Unknown		222									SCN-Bimane	T1C1	Target Compound	1146	3015	2.22	2.21	0.00		M+	N/A	N/A	N/A	N/A	124.1	124.1	-.002 (mmu)	2.027	N/A	N/A	Method	True	False	N/A	N/A	N/A			Pass	Pass	N/A	N/A	N/A	Confirmed	N/A
91	Processed	190419-091		Unknown		222									SCN-Bimane IS	T1	Internal Standard	1169	3341	2.24	2.22	-0.02		M+	1	1	1	N/A	111	111	.000 (mmu)	N/A	N/A	N/A	Method	True	False	N/A	N/A	N/A			Pass	Pass	N/A	N/A	N/A	Confirmed	N/A
91	Processed	190419-091		Unknown		222									SCN-Bimane IS	T1C1	Internal Standard	584	1634	2.22	2.21	0.01		M+	N/A	N/A	N/A	N/A	126.1	126.1	-.002 (mmu)	N/A	N/A	N/A	Method	True	False	N/A	N/A	N/A			Pass	Pass	N/A	N/A	N/A	Confirmed	N/A
92	Processed	190419-092		Unknown		221									SCN-Bimane	T1	Target Compound	4348	11249	2.23	2.21	-0.02		M+	47.21	N/A	47.21	N/A	111	111	.000 (mmu)	1.991	1	5651	Method	True	False	N/A	N/A	N/A			Pass	Pass	N/A	N/A	N/A	Confirmed	N/A
92	Processed	190419-092		Unknown		221									SCN-Bimane	T1C1	Target Compound	1926	5169	2.21	2.21	0.00		M+	N/A	N/A	N/A	N/A	124.1	124.1	-.002 (mmu)	1.991	N/A	N/A	Method	True	False	N/A	N/A	N/A			Pass	Pass	N/A	N/A	N/A	Confirmed	N/A
92	Processed	190419-092		Unknown		221									SCN-Bimane IS	T1	Internal Standard	2181	5651	2.24	2.21	-0.03		M+	1	1	1	N/A	111	111	.000 (mmu)	N/A	N/A	N/A	Method	True	False	N/A	N/A	N/A			Pass	Pass	N/A	N/A	N/A	Confirmed	N/A
92	Processed	190419-092		Unknown		221									SCN-Bimane IS	T1C1	Internal Standard	919	2673	2.21	2.2	0.00		M+	N/A	N/A	N/A	N/A	126.1	126.1	-.002 (mmu)	N/A	N/A	N/A	Method	True	False	N/A	N/A	N/A			Pass	Pass	N/A	N/A	N/A	Confirmed	N/A
93	Processed	190419-093		Unknown		220									SCN-Bimane	T1	Target Compound	4283	12095	2.23	2.21	-0.02		M+	52.293	N/A	52.293	N/A	111	111	.000 (mmu)	2.191	1	5520	Method	True	False	N/A	N/A	N/A			Pass	Pass	N/A	N/A	N/A	Confirmed	N/A
93	Processed	190419-093		Unknown		220									SCN-Bimane	T1C1	Target Compound	2199	5704	2.21	2.21	0.01		M+	N/A	N/A	N/A	N/A	124.1	124.1	-.002 (mmu)	2.191	N/A	N/A	Method	True	False	N/A	N/A	N/A			Pass	Pass	N/A	N/A	N/A	Confirmed	N/A
93	Processed	190419-093		Unknown		220									SCN-Bimane IS	T1	Internal Standard	1798	5520	2.24	2.21	-0.03		M+	1	1	1	N/A	111	111	.000 (mmu)	N/A	N/A	N/A	Method	True	False	N/A	N/A	N/A			Pass	Pass	N/A	N/A	N/A	Confirmed	N/A
93	Processed	190419-093		Unknown		220									SCN-Bimane IS	T1C1	Internal Standard	888	2452	2.21	2.21	0.00		M+	N/A	N/A	N/A	N/A	126.1	126.1	-.002 (mmu)	N/A	N/A	N/A	Method	True	False	N/A	N/A	N/A			Pass	Pass	N/A	N/A	N/A	Confirmed	N/A
94	Processed	190419-094		Unknown		254									SCN-Bimane	T1	Target Compound	1334	3854	2.23	2.22	-0.01		M+	7.129	N/A	7.129	N/A	111	111	.000 (mmu)	0.408	1	9447	Method	True	False	N/A	N/A	N/A			Pass	Pass	N/A	N/A	N/A	Confirmed	N/A
94	Processed	190419-094		Unknown		254									SCN-Bimane	T1C1	Target Compound	574	1765	2.22	2.21	0.01		M+	N/A	N/A	N/A	N/A	124.1	124.1	-.002 (mmu)	0.408	N/A	N/A	Method	True	False	N/A	N/A	N/A			Pass	Pass	N/A	N/A	N/A	Confirmed	N/A
94	Processed	190419-094		Unknown		254									SCN-Bimane IS	T1	Internal Standard	3530	9447	2.24	2.21	-0.03		M+	1	1	1	N/A	111	111	.000 (mmu)	N/A	N/A	N/A	Method	True	False	N/A	N/A	N/A			Pass	Pass	N/A	N/A	N/A	Confirmed	N/A
94	Processed	190419-094		Unknown		254									SCN-Bimane IS	T1C1	Internal Standard	1589	4513	2.21	2.22	0.00		M+	N/A	N/A	N/A	N/A	126.1	126.1	-.002 (mmu)	N/A	N/A	N/A	Method	True	False	N/A	N/A	N/A			Pass	Pass	N/A	N/A	N/A	Confirmed	N/A
95	Processed	190419-095_20190423140501		Unknown		Water									SCN-Bimane	T1	Target Compound	136	315	2.23	2.28	0.05		M+	-2.024	N/A	-2.024	N/A	111	111	.000 (mmu)	0.047	1	6763	Method	True	False	N/A	N/A	N/A			Pass	Fail	N/A	N/A	N/A	Identified	N/A
95	Processed	190419-095_20190423140501		Unknown		Water									SCN-Bimane	T1C1	Target Compound	50	57	2.28	2.26	0.02		M+	N/A	N/A	N/A	N/A	124.1	124.1	-.002 (mmu)	0.047	N/A	N/A	Method	True	False	N/A	N/A	N/A			Pass	Fail	N/A	N/A	N/A	Identified	N/A
95	Processed	190419-095_20190423140501		Unknown		Water									SCN-Bimane IS	T1	Internal Standard	2493	6763	2.24	2.27	0.03		M+	1	1	1	N/A	111	111	.000 (mmu)	N/A	N/A	N/A	Method	True	False	N/A	N/A	N/A			Pass	Pass	N/A	N/A	N/A	Confirmed	N/A
95	Processed	190419-095_20190423140501		Unknown		Water									SCN-Bimane IS	T1C1	Internal Standard	1376	3440	2.27	2.26	0.01		M+	N/A	N/A	N/A	N/A	126.1	126.1	-.002 (mmu)	N/A	N/A	N/A	Method	True	False	N/A	N/A	N/A			Pass	Pass	N/A	N/A	N/A	Confirmed	N/A
96	Processed	190419-096		Unknown		Water									SCN-Bimane	T1	Target Compound	80	176	2.23	2.21	-0.02		M+	-2.339	N/A	-2.339	N/A	111	111	.000 (mmu)	0.034	1	5170	Method	True	False	N/A	N/A	N/A			Pass	Pass	N/A	N/A	N/A	Confirmed	N/A
96	Processed	190419-096		Unknown		Water									SCN-Bimane	T1C1	Target Compound	63	71	2.21	2.21	0.00		M+	N/A	N/A	N/A	N/A	124.1	124.1	-.002 (mmu)	0.034	N/A	N/A	Method	True	False	N/A	N/A	N/A			Pass	Pass	N/A	N/A	N/A	Confirmed	N/A
96	Processed	190419-096		Unknown		Water									SCN-Bimane IS	T1	Internal Standard	1878	5170	2.24	2.21	-0.03		M+	1	1	1	N/A	111	111	.000 (mmu)	N/A	N/A	N/A	Method	True	False	N/A	N/A	N/A			Pass	Pass	N/A	N/A	N/A	Confirmed	N/A
96	Processed	190419-096		Unknown		Water									SCN-Bimane IS	T1C1	Internal Standard	792	2361	2.21	2.21	0.00		M+	N/A	N/A	N/A	N/A	126.1	126.1	-.002 (mmu)	N/A	N/A	N/A	Method	True	False	N/A	N/A	N/A			Pass	Pass	N/A	N/A	N/A	Confirmed	N/A
[truncated: 15 more columns]

## Sheet: Filter
Batch Order	Status	Filename	Group	Sample Type	Level	Sample ID	Sample Name	Comments	ColumnHeader1	ColumnHeader2	ColumnHeader3	ColumnHeader4	ColumnHeader5	ColumnHeader6	Compound	Peak Label	Type	Height	Area	RT	Actual RT	RT Delta	Formula	Adduct	Calculated Amt	Theoretical Amt	Sample Amt	Std Add Amount	m/z (Expected)	m/z (Apex)	m/z (Delta)	Response Ratio	ISTD Amt	ISTD Response	Integration Mode	Active	Excluded	%Diff	%RSD	% CV	Channel	Final Units	PK	IR	IP	LS	FI	Confirm	Isotopic Pattern Score (%)
1	Processed	190419-001_20190423084611_20190423090958		Unknown		322									SCN-Bimane	T1	Target Compound	570	1417	2.23	2.26	0.03		M+	23.855	N/A	23.855	N/A	111	111	.000 (mmu)	1.068	1	1326	Method	True	False	N/A	N/A	N/A			Pass	Pass	N/A	N/A	N/A	Confirmed	N/A
1	Processed	190419-001_20190423084611_20190423090958		Unknown		322									SCN-Bimane	T1C1	Target Compound	311	648	2.26	2.25	0.01		M+	N/A	N/A	N/A	N/A	124.1	124.1	-.002 (mmu)	1.068	N/A	N/A	Method	True	False	N/A	N/A	N/A			Pass	Pass	N/A	N/A	N/A	Confirmed	N/A
1	Processed	190419-001_20190423084611_20190423090958		Unknown		322									SCN-Bimane IS	T1	Internal Standard	471	1326	2.24	2.25	0.01		M+	1	1	1	N/A	111	111	.000 (mmu)	N/A	N/A	N/A	Method	True	False	N/A	N/A	N/A			Pass	Pass	N/A	N/A	N/A	Confirmed	N/A
1	Processed	190419-001_20190423084611_20190423090958		Unknown		322									SCN-Bimane IS	T1C1	Internal Standard	215	526	2.25	2.26	0.00		M+	N/A	N/A	N/A	N/A	126.1	126.1	-.002 (mmu)	N/A	N/A	N/A	Method	True	False	N/A	N/A	N/A			Pass	Pass	N/A	N/A	N/A	Confirmed	N/A
2	Processed	190419-002_20190423083816		Unknown		321									SCN-Bimane	T1	Target Compound	919	2490	2.23	2.26	0.03		M+	26.967	N/A	26.967	N/A	111	111	.000 (mmu)	1.191	1	2090	Method	True	False	N/A	N/A	N/A			Pass	Pass	N/A	N/A	N/A	Confirmed	N/A
2	Processed	190419-002_20190423083816		Unknown		321									SCN-Bimane	T1C1	Target Compound	372	1066	2.26	2.26	0.00		M+	N/A	N/A	N/A	N/A	124.1	124.1	-.002 (mmu)	1.191	N/A	N/A	Method	True	False	N/A	N/A	N/A			Pass	Pass	N/A	N/A	N/A	Confirmed	N/A
2	Processed	190419-002_20190423083816		Unknown		321									SCN-Bimane IS	T1	Internal Standard	707	2090	2.24	2.27	0.03		M+	1	1	1	N/A	111	111	.000 (mmu)	N/A	N/A	N/A	Method	True	False	N/A	N/A	N/A			Pass	Pass	N/A	N/A	N/A	Confirmed	N/A
2	Processed	190419-002_20190423083816		Unknown		321									SCN-Bimane IS	T1C1	Internal Standard	438	1016	2.27	2.27	0.00		M+	N/A	N/A	N/A	N/A	126.1	126.1	-.002 (mmu)	N/A	N/A	N/A	Method	True	False	N/A	N/A	N/A			Pass	Pass	N/A	N/A	N/A	Confirmed	N/A
3	Processed	190419-003		Unknown		324									SCN-Bimane	T1	Target Compound	1979	5049	2.23	2.21	-0.02		M+	16.726	N/A	16.726	N/A	111	111	.000 (mmu)	0.787	1	6416	Method	True	False	N/A	N/A	N/A			Pass	Pass	N/A	N/A	N/A	Confirmed	N/A
3	Processed	190419-003		Unknown		324									SCN-Bimane	T1C1	Target Compound	871	2352	2.21	2.21	0.00		M+	N/A	N/A	N/A	N/A	124.1	124.1	-.002 (mmu)	0.787	N/A	N/A	Method	True	False	N/A	N/A	N/A			Pass	Pass	N/A	N/A	N/A	Confirmed	N/A
3	Processed	190419-003		Unknown		324									SCN-Bimane IS	T1	Internal Standard	2229	6416	2.24	2.21	-0.03		M+	1	1	1	N/A	111	111	.000 (mmu)	N/A	N/A	N/A	Method	True	False	N/A	N/A	N/A			Pass	Pass	N/A	N/A	N/A	Confirmed	N/A
3	Processed	190419-003		Unknown		324									SCN-Bimane IS	T1C1	Internal Standard	1183	3064	2.21	2.21	-0.01		M+	N/A	N/A	N/A	N/A	126.1	126.1	-.002 (mmu)	N/A	N/A	N/A	Method	True	False	N/A	N/A	N/A			Pass	Pass	N/A	N/A	N/A	Confirmed	N/A
4	Processed	190419-004		Unknown		320									SCN-Bimane	T1	Target Compound	2387	6372	2.23	2.21	-0.02		M+	19.39	N/A	19.39	N/A	111	111	.000 (mmu)	0.892	1	7143	Method	True	False	N/A	N/A	N/A			Pass	Pass	N/A	N/A	N/A	Confirmed	N/A
4	Processed	190419-004		Unknown		320									SCN-Bimane	T1C1	Target Compound	1186	2823	2.21	2.21	0.00		M+	N/A	N/A	N/A	N/A	124.1	124.1	-.002 (mmu)	0.892	N/A	N/A	Method	True	False	N/A	N/A	N/A			Pass	Pass	N/A	N/A	N/A	Confirmed	N/A
4	Processed	190419-004		Unknown		320									SCN-Bimane IS	T1	Internal Standard	2685	7143	2.24	2.21	-0.03		M+	1	1	1	N/A	111	111	.000 (mmu)	N/A	N/A	N/A	Method	True	False	N/A	N/A	N/A			Pass	Pass	N/A	N/A	N/A	Confirmed	N/A
4	Processed	190419-004		Unknown		320									SCN-Bimane IS	T1C1	Internal Standard	1238	3138	2.21	2.22	-0.01		M+	N/A	N/A	N/A	N/A	126.1	126.1	-.002 (mmu)	N/A	N/A	N/A	Method	True	False	N/A	N/A	N/A			Pass	Pass	N/A	N/A	N/A	Confirmed	N/A
5	Processed	190419-005		Unknown		325									SCN-Bimane	T1	Target Compound	1155	2779	2.23	2.22	-0.01		M+	9.679	N/A	9.679	N/A	111	111	.000 (mmu)	0.509	1	5464	Method	True	False	N/A	N/A	N/A			Pass	Pass	N/A	N/A	N/A	Confirmed	N/A
5	Processed	190419-005		Unknown		325									SCN-Bimane	T1C1	Target Compound	469	1239	2.22	2.22	0.00		M+	N/A	N/A	N/A	N/A	124.1	124.1	-.002 (mmu)	0.509	N/A	N/A	Method	True	False	N/A	N/A	N/A			Pass	Pass	N/A	N/A	N/A	Confirmed	N/A
5	Processed	190419-005		Unknown		325									SCN-Bimane IS	T1	Internal Standard	1905	5464	2.24	2.21	-0.03		M+	1	1	1	N/A	111	111	.000 (mmu)	N/A	N/A	N/A	Method	True	False	N/A	N/A	N/A			Pass	Pass	N/A	N/A	N/A	Confirmed	N/A
5	Processed	190419-005		Unknown		325									SCN-Bimane IS	T1C1	Internal Standard	1058	2772	2.21	2.21	0.00		M+	N/A	N/A	N/A	N/A	126.1	126.1	-.002 (mmu)	N/A	N/A	N/A	Method	True	False	N/A	N/A	N/A			Pass	Pass	N/A	N/A	N/A	Confirmed	N/A
6	Processed	190419-006		Unknown		319									SCN-Bimane	T1	Target Compound	5503	15237	2.23	2.22	-0.01		M+	61.525	N/A	61.525	N/A	111	111	.000 (mmu)	2.556	1	5962	Method	True	False	N/A	N/A	N/A			Pass	Pass	N/A	N/A	N/A	Confirmed	N/A
6	Processed	190419-006		Unknown		319									SCN-Bimane	T1C1	Target Compound	2222	6519	2.22	2.22	0.00		M+	N/A	N/A	N/A	N/A	124.1	124.1	-.002 (mmu)	2.556	N/A	N/A	Method	True	False	N/A	N/A	N/A			Pass	Pass	N/A	N/A	N/A	Confirmed	N/A
6	Processed	190419-006		Unknown		319									SCN-Bimane IS	T1	Internal Standard	2234	5962	2.24	2.21	-0.03		M+	1	1	1	N/A	111	111	.000 (mmu)	N/A	N/A	N/A	Method	True	False	N/A	N/A	N/A			Pass	Pass	N/A	N/A	N/A	Confirmed	N/A
6	Processed	190419-006		Unknown		319									SCN-Bimane IS	T1C1	Internal Standard	1009	2815	2.21	2.21	0.00		M+	N/A	N/A	N/A	N/A	126.1	126.1	-.002 (mmu)	N/A	N/A	N/A	Method	True	False	N/A	N/A	N/A			Pass	Pass	N/A	N/A	N/A	Confirmed	N/A
7	Processed	190419-007		Unknown		313									SCN-Bimane	T1	Target Compound	2702	7461	2.23	2.21	-0.02		M+	27.593	N/A	27.593	N/A	111	111	.000 (mmu)	1.216	1	6135	Method	True	False	N/A	N/A	N/A			Pass	Pass	N/A	N/A	N/A	Confirmed	N/A
7	Processed	190419-007		Unknown		313									SCN-Bimane	T1C1	Target Compound	1228	3479	2.21	2.2	0.01		M+	N/A	N/A	N/A	N/A	124.1	124.1	-.002 (mmu)	1.216	N/A	N/A	Method	True	False	N/A	N/A	N/A			Pass	Pass	N/A	N/A	N/A	Confirmed	N/A
7	Processed	190419-007		Unknown		313									SCN-Bimane IS	T1	Internal Standard	2389	6135	2.24	2.21	-0.03		M+	1	1	1	N/A	111	111	.000 (mmu)	N/A	N/A	N/A	Method	True	False	N/A	N/A	N/A			Pass	Pass	N/A	N/A	N/A	Confirmed	N/A
7	Processed	190419-007		Unknown		313									SCN-Bimane IS	T1C1	Internal Standard	1052	2954	2.21	2.21	0.00		M+	N/A	N/A	N/A	N/A	126.1	126.1	-.002 (mmu)	N/A	N/A	N/A	Method	True	False	N/A	N/A	N/A			Pass	Pass	N/A	N/A	N/A	Confirmed	N/A
8	Processed	190419-008		Unknown		311/312									SCN-Bimane	T1	Target Compound	5996	15853	2.23	2.21	-0.02		M+	66.27	N/A	66.27	N/A	111	111	.000 (mmu)	2.743	1	5779	Method	True	False	N/A	N/A	N/A			Pass	Pass	N/A	N/A	N/A	Confirmed	N/A
8	Processed	190419-008		Unknown		311/312									SCN-Bimane	T1C1	Target Compound	2733	7493	2.21	2.21	0.00		M+	N/A	N/A	N/A	N/A	124.1	124.1	-.002 (mmu)	2.743	N/A	N/A	Method	True	False	N/A	N/A	N/A			Pass	Pass	N/A	N/A	N/A	Confirmed	N/A
8	Processed	190419-008		Unknown		311/312									SCN-Bimane IS	T1	Internal Standard	2035	5779	2.24	2.21	-0.03		M+	1	1	1	N/A	111	111	.000 (mmu)	N/A	N/A	N/A	Method	True	False	N/A	N/A	N/A			Pass	Pass	N/A	N/A	N/A	Confirmed	N/A
8	Processed	190419-008		Unknown		311/312									SCN-Bimane IS	T1C1	Internal Standard	951	2534	2.21	2.21	0.00		M+	N/A	N/A	N/A	N/A	126.1	126.1	-.002 (mmu)	N/A	N/A	N/A	Method	True	False	N/A	N/A	N/A			Pass	Pass	N/A	N/A	N/A	Confirmed	N/A
9	Processed	190419-009		Unknown		310									SCN-Bimane	T1	Target Compound	2627	7253	2.23	2.22	-0.01		M+	32.103	N/A	32.103	N/A	111	111	.000 (mmu)	1.394	1	5203	Method	True	False	N/A	N/A	N/A			Pass	Pass	N/A	N/A	N/A	Confirmed	N/A
9	Processed	190419-009		Unknown		310									SCN-Bimane	T1C1	Target Compound	1167	3122	2.22	2.21	0.01		M+	N/A	N/A	N/A	N/A	124.1	124.1	-.002 (mmu)	1.394	N/A	N/A	Method	True	False	N/A	N/A	N/A			Pass	Pass	N/A	N/A	N/A	Confirmed	N/A
9	Processed	190419-009		Unknown		310									SCN-Bimane IS	T1	Internal Standard	1968	5203	2.24	2.21	-0.03		M+	1	1	1	N/A	111	111	.000 (mmu)	N/A	N/A	N/A	Method	True	False	N/A	N/A	N/A			Pass	Pass	N/A	N/A	N/A	Confirmed	N/A
9	Processed	190419-009		Unknown		310									SCN-Bimane IS	T1C1	Internal Standard	965	2540	2.21	2.22	0.00		M+	N/A	N/A	N/A	N/A	126.1	126.1	-.002 (mmu)	N/A	N/A	N/A	Method	True	False	N/A	N/A	N/A			Pass	Pass	N/A	N/A	N/A	Confirmed	N/A
10	Processed	190419-010		Unknown		307									SCN-Bimane	T1	Target Compound	2435	6264	2.23	2.21	-0.02		M+	21.421	N/A	21.421	N/A	111	111	.000 (mmu)	0.972	1	6443	Method	True	False	N/A	N/A	N/A			Pass	Pass	N/A	N/A	N/A	Confirmed	N/A
10	Processed	190419-010		Unknown		307									SCN-Bimane	T1C1	Target Compound	1043	2841	2.21	2.21	0.00		M+	N/A	N/A	N/A	N/A	124.1	124.1	-.002 (mmu)	0.972	N/A	N/A	Method	True	False	N/A	N/A	N/A			Pass	Pass	N/A	N/A	N/A	Confirmed	N/A
10	Processed	190419-010		Unknown		307									SCN-Bimane IS	T1	Internal Standard	2483	6443	2.24	2.21	-0.03		M+	1	1	1	N/A	111	111	.000 (mmu)	N/A	N/A	N/A	Method	True	False	N/A	N/A	N/A			Pass	Pass	N/A	N/A	N/A	Confirmed	N/A
10	Processed	190419-010		Unknown		307									SCN-Bimane IS	T1C1	Internal Standard	1257	3127	2.21	2.21	0.00		M+	N/A	N/A	N/A	N/A	126.1	126.1	-.002 (mmu)	N/A	N/A	N/A	Method	True	False	N/A	N/A	N/A			Pass	Pass	N/A	N/A	N/A	Confirmed	N/A
11	Processed	190419-011		Unknown		306									SCN-Bimane	T1	Target Compound	1582	4393	2.23	2.22	-0.01		M+	26.03	N/A	26.03	N/A	111	111	.000 (mmu)	1.154	1	3806	Method	True	False	N/A	N/A	N/A			Pass	Pass	N/A	N/A	N/A	Confirmed	N/A
11	Processed	190419-011		Unknown		306									SCN-Bimane	T1C1	Target Compound	679	1895	2.22	2.21	0.01		M+	N/A	N/A	N/A	N/A	124.1	124.1	-.002 (mmu)	1.154	N/A	N/A	Method	True	False	N/A	N/A	N/A			Pass	Pass	N/A	N/A	N/A	Confirmed	N/A
11	Processed	190419-011		Unknown		306									SCN-Bimane IS	T1	Internal Standard	1381	3806	2.24	2.22	-0.02		M+	1	1	1	N/A	111	111	.000 (mmu)	N/A	N/A	N/A	Method	True	False	N/A	N/A	N/A			Pass	Pass	N/A	N/A	N/A	Confirmed	N/A
11	Processed	190419-011		Unknown		306									SCN-Bimane IS	T1C1	Internal Standard	691	1954	2.22	2.21	0.01		M+	N/A	N/A	N/A	N/A	126.1	126.1	-.002 (mmu)	N/A	N/A	N/A	Method	True	False	N/A	N/A	N/A			Pass	Pass	N/A	N/A	N/A	Confirmed	N/A
12	Processed	190419-012		Unknown		305									SCN-Bimane	T1	Target Compound	2335	6077	2.23	2.22	-0.01		M+	23.645	N/A	23.645	N/A	111	111	.000 (mmu)	1.06	1	5733	Method	True	False	N/A	N/A	N/A			Pass	Pass	N/A	N/A	N/A	Confirmed	N/A
12	Processed	190419-012		Unknown		305									SCN-Bimane	T1C1	Target Compound	1031	2848	2.22	2.22	-0.01		M+	N/A	N/A	N/A	N/A	124.1	124.1	-.002 (mmu)	1.06	N/A	N/A	Method	True	False	N/A	N/A	N/A			Pass	Pass	N/A	N/A	N/A	Confirmed	N/A
12	Processed	190419-012		Unknown		305									SCN-Bimane IS	T1	Internal Standard	2193	5733	2.24	2.22	-0.02		M+	1	1	1	N/A	111	111	.000 (mmu)	N/A	N/A	N/A	Method	True	False	N/A	N/A	N/A			Pass	Pass	N/A	N/A	N/A	Confirmed	N/A
12	Processed	190419-012		Unknown		305									SCN-Bimane IS	T1C1	Internal Standard	1184	2908	2.22	2.22	0.00		M+	N/A	N/A	N/A	N/A	126.1	126.1	-.002 (mmu)	N/A	N/A	N/A	Method	True	False	N/A	N/A	N/A			Pass	Pass	N/A	N/A	N/A	Confirmed	N/A
13	Processed	190419-013		Unknown		304									SCN-Bimane	T1	Target Compound	1786	4616	2.23	2.21	-0.02		M+	14.782	N/A	14.782	N/A	111	111	.000 (mmu)	0.71	1	6500	Method	True	False	N/A	N/A	N/A			Pass	Pass	N/A	N/A	N/A	Confirmed	N/A
13	Processed	190419-013		Unknown		304									SCN-Bimane	T1C1	Target Compound	853	2085	2.21	2.21	0.00		M+	N/A	N/A	N/A	N/A	124.1	124.1	-.002 (mmu)	0.71	N/A	N/A	Method	True	False	N/A	N/A	N/A			Pass	Pass	N/A	N/A	N/A	Confirmed	N/A
13	Processed	190419-013		Unknown		304									SCN-Bimane IS	T1	Internal Standard	2397	6500	2.24	2.21	-0.03		M+	1	1	1	N/A	111	111	.000 (mmu)	N/A	N/A	N/A	Method	True	False	N/A	N/A	N/A			Pass	Pass	N/A	N/A	N/A	Confirmed	N/A
13	Processed	190419-013		Unknown		304									SCN-Bimane IS	T1C1	Internal Standard	1129	2856	2.21	2.21	0.00		M+	N/A	N/A	N/A	N/A	126.1	126.1	-.002 (mmu)	N/A	N/A	N/A	Method	True	False	N/A	N/A	N/A			Pass	Pass	N/A	N/A	N/A	Confirmed	N/A
14	Processed	190419-014_20190423091825		Unknown		303									SCN-Bimane	T1	Target Compound	1039	2600	2.23	2.22	-0.01		M+	21.717	N/A	21.717	N/A	111	111	.000 (mmu)	0.984	1	2643	Method	True	False	N/A	N/A	N/A			Pass	Pass	N/A	N/A	N/A	Confirmed	N/A
14	Processed	190419-014_20190423091825		Unknown		303									SCN-Bimane	T1C1	Target Compound	497	1226	2.22	2.22	0.00		M+	N/A	N/A	N/A	N/A	124.1	124.1	-.002 (mmu)	0.984	N/A	N/A	Method	True	False	N/A	N/A	N/A			Pass	Pass	N/A	N/A	N/A	Confirmed	N/A
14	Processed	190419-014_20190423091825		Unknown		303									SCN-Bimane IS	T1	Internal Standard	1021	2643	2.24	2.22	-0.02		M+	1	1	1	N/A	111	111	.000 (mmu)	N/A	N/A	N/A	Method	True	False	N/A	N/A	N/A			Pass	Pass	N/A	N/A	N/A	Confirmed	N/A
14	Processed	190419-014_20190423091825		Unknown		303									SCN-Bimane IS	T1C1	Internal Standard	477	1229	2.22	2.22	0.00		M+	N/A	N/A	N/A	N/A	126.1	126.1	-.002 (mmu)	N/A	N/A	N/A	Method	True	False	N/A	N/A	N/A			Pass	Pass	N/A	N/A	N/A	Confirmed	N/A
15	Processed	190419-015		Unknown		302									SCN-Bimane	T1	Target Compound	2071	5252	2.23	2.21	-0.02		M+	20.906	N/A	20.906	N/A	111	111	.000 (mmu)	0.952	1	5517	Method	True	False	N/A	N/A	N/A			Pass	Pass	N/A	N/A	N/A	Confirmed	N/A
15	Processed	190419-015		Unknown		302									SCN-Bimane	T1C1	Target Compound	844	2331	2.21	2.22	-0.01		M+	N/A	N/A	N/A	N/A	124.1	124.1	-.002 (mmu)	0.952	N/A	N/A	Method	True	False	N/A	N/A	N/A			Pass	Pass	N/A	N/A	N/A	Confirmed	N/A
15	Processed	190419-015		Unknown		302									SCN-Bimane IS	T1	Internal Standard	2005	5517	2.24	2.22	-0.02		M+	1	1	1	N/A	111	111	.000 (mmu)	N/A	N/A	N/A	Method	True	False	N/A	N/A	N/A			Pass	Pass	N/A	N/A	N/A	Confirmed	N/A
15	Processed	190419-015		Unknown		302									SCN-Bimane IS	T1C1	Internal Standard	810	2446	2.22	2.22	0.00		M+	N/A	N/A	N/A	N/A	126.1	126.1	-.002 (mmu)	N/A	N/A	N/A	Method	True	False	N/A	N/A	N/A			Pass	Pass	N/A	N/A	N/A	Confirmed	N/A
16	Processed	190419-016_20190423092947		Unknown		293									SCN-Bimane	T1	Target Compound	2696	7105	2.23	2.25	0.02		M+	47.813	N/A	47.813	N/A	111	111	.000 (mmu)	2.014	1	3527	Method	True	False	N/A	N/A	N/A			Pass	Pass	N/A	N/A	N/A	Confirmed	N/A
16	Processed	190419-016_20190423092947		Unknown		293									SCN-Bimane	T1C1	Target Compound	1281	3160	2.25	2.25	0.00		M+	N/A	N/A	N/A	N/A	124.1	124.1	-.002 (mmu)	2.014	N/A	N/A	Method	True	False	N/A	N/A	N/A			Pass	Pass	N/A	N/A	N/A	Confirmed	N/A
16	Processed	190419-016_20190423092947		Unknown		293									SCN-Bimane IS	T1	Internal Standard	1464	3527	2.24	2.25	0.01		M+	1	1	1	N/A	111	111	.000 (mmu)	N/A	N/A	N/A	Method	True	False	N/A	N/A	N/A			Pass	Pass	N/A	N/A	N/A	Confirmed	N/A
16	Processed	190419-016_20190423092947		Unknown		293									SCN-Bimane IS	T1C1	Internal Standard	724	1679	2.25	2.25	0.00		M+	N/A	N/A	N/A	N/A	126.1	126.1	-.002 (mmu)	N/A	N/A	N/A	Method	True	False	N/A	N/A	N/A			Pass	Pass	N/A	N/A	N/A	Confirmed	N/A
17	Processed	190419-017		Unknown		292									SCN-Bimane	T1	Target Compound	2258	6137	2.23	2.21	-0.02		M+	25.572	N/A	25.572	N/A	111	111	.000 (mmu)	1.136	1	5402	Method	True	False	N/A	N/A	N/A			Pass	Pass	N/A	N/A	N/A	Confirmed	N/A
17	Processed	190419-017		Unknown		292									SCN-Bimane	T1C1	Target Compound	1129	3187	2.21	2.2	0.00		M+	N/A	N/A	N/A	N/A	124.1	124.1	-.002 (mmu)	1.136	N/A	N/A	Method	True	False	N/A	N/A	N/A			Pass	Pass	N/A	N/A	N/A	Confirmed	N/A
17	Processed	190419-017		Unknown		292									SCN-Bimane IS	T1	Internal Standard	1977	5402	2.24	2.21	-0.03		M+	1	1	1	N/A	111	111	.000 (mmu)	N/A	N/A	N/A	Method	True	False	N/A	N/A	N/A			Pass	Pass	N/A	N/A	N/A	Confirmed	N/A
17	Processed	190419-017		Unknown		292									SCN-Bimane IS	T1C1	Internal Standard	1000	2488	2.21	2.21	0.00		M+	N/A	N/A	N/A	N/A	126.1	126.1	-.002 (mmu)	N/A	N/A	N/A	Method	True	False	N/A	N/A	N/A			Pass	Pass	N/A	N/A	N/A	Confirmed	N/A
18	Processed	190419-018		Unknown		291									SCN-Bimane	T1	Target Compound	3605	9726	2.23	2.21	-0.02		M+	38.979	N/A	38.979	N/A	111	111	.000 (mmu)	1.666	1	5839	Method	True	False	N/A	N/A	N/A			Pass	Pass	N/A	N/A	N/A	Confirmed	N/A
18	Processed	190419-018		Unknown		291									SCN-Bimane	T1C1	Target Compound	1662	4657	2.21	2.2	0.01		M+	N/A	N/A	N/A	N/A	124.1	124.1	-.002 (mmu)	1.666	N/A	N/A	Method	True	False	N/A	N/A	N/A			Pass	Pass	N/A	N/A	N/A	Confirmed	N/A
18	Processed	190419-018		Unknown		291									SCN-Bimane IS	T1	Internal Standard	2284	5839	2.24	2.2	-0.04		M+	1	1	1	N/A	111	111	.000 (mmu)	N/A	N/A	N/A	Method	True	False	N/A	N/A	N/A			Pass	Pass	N/A	N/A	N/A	Confirmed	N/A
18	Processed	190419-018		Unknown		291									SCN-Bimane IS	T1C1	Internal Standard	1029	2775	2.2	2.21	0.00		M+	N/A	N/A	N/A	N/A	126.1	126.1	-.002 (mmu)	N/A	N/A	N/A	Method	True	False	N/A	N/A	N/A			Pass	Pass	N/A	N/A	N/A	Confirmed	N/A
19	Processed	190419-019		Unknown		290									SCN-Bimane	T1	Target Compound	2659	7193	2.23	2.22	-0.01		M+	35.242	N/A	35.242	N/A	111	111	.000 (mmu)	1.518	1	4738	Method	True	False	N/A	N/A	N/A			Pass	Pass	N/A	N/A	N/A	Confirmed	N/A
19	Processed	190419-019		Unknown		290									SCN-Bimane	T1C1	Target Compound	1307	3319	2.22	2.22	0.00		M+	N/A	N/A	N/A	N/A	124.1	124.1	-.002 (mmu)	1.518	N/A	N/A	Method	True	False	N/A	N/A	N/A			Pass	Pass	N/A	N/A	N/A	Confirmed	N/A
19	Processed	190419-019		Unknown		290									SCN-Bimane IS	T1	Internal Standard	1849	4738	2.24	2.22	-0.02		M+	1	1	1	N/A	111	111	.000 (mmu)	N/A	N/A	N/A	Method	True	False	N/A	N/A	N/A			Pass	Pass	N/A	N/A	N/A	Confirmed	N/A
19	Processed	190419-019		Unknown		290									SCN-Bimane IS	T1C1	Internal Standard	932	2163	2.22	2.22	0.00		M+	N/A	N/A	N/A	N/A	126.1	126.1	-.002 (mmu)	N/A	N/A	N/A	Method	True	False	N/A	N/A	N/A			Pass	Pass	N/A	N/A	N/A	Confirmed	N/A
20	Processed	190419-020		Unknown		289									SCN-Bimane	T1	Target Compound	1798	5019	2.23	2.22	-0.01		M+	27.795	N/A	27.795	N/A	111	111	.000 (mmu)	1.224	1	4100	Method	True	False	N/A	N/A	N/A			Pass	Pass	N/A	N/A	N/A	Confirmed	N/A
20	Processed	190419-020		Unknown		289									SCN-Bimane	T1C1	Target Compound	851	2466	2.22	2.21	0.01		M+	N/A	N/A	N/A	N/A	124.1	124.1	-.002 (mmu)	1.224	N/A	N/A	Method	True	False	N/A	N/A	N/A			Pass	Pass	N/A	N/A	N/A	Confirmed	N/A
20	Processed	190419-020		Unknown		289									SCN-Bimane IS	T1	Internal Standard	1576	4100	2.24	2.22	-0.02		M+	1	1	1	N/A	111	111	.000 (mmu)	N/A	N/A	N/A	Method	True	False	N/A	N/A	N/A			Pass	Pass	N/A	N/A	N/A	Confirmed	N/A
20	Processed	190419-020		Unknown		289									SCN-Bimane IS	T1C1	Internal Standard	805	1924	2.22	2.22	0.00		M+	N/A	N/A	N/A	N/A	126.1	126.1	-.002 (mmu)	N/A	N/A	N/A	Method	True	False	N/A	N/A	N/A			Pass	Pass	N/A	N/A	N/A	Confirmed	N/A
21	Processed	190419-021		Unknown		288									SCN-Bimane	T1	Target Compound	3054	8108	2.23	2.21	-0.02		M+	33.346	N/A	33.346	N/A	111	111	.000 (mmu)	1.443	1	5618	Method	True	False	N/A	N/A	N/A			Pass	Pass	N/A	N/A	N/A	Confirmed	N/A
21	Processed	190419-021		Unknown		288									SCN-Bimane	T1C1	Target Compound	1539	3751	2.21	2.21	0.00		M+	N/A	N/A	N/A	N/A	124.1	124.1	-.002 (mmu)	1.443	N/A	N/A	Method	True	False	N/A	N/A	N/A			Pass	Pass	N/A	N/A	N/A	Confirmed	N/A
21	Processed	190419-021		Unknown		288									SCN-Bimane IS	T1	Internal Standard	2271	5618	2.24	2.21	-0.03		M+	1	1	1	N/A	111	111	.000 (mmu)	N/A	N/A	N/A	Method	True	False	N/A	N/A	N/A			Pass	Pass	N/A	N/A	N/A	Confirmed	N/A
21	Processed	190419-021		Unknown		288									SCN-Bimane IS	T1C1	Internal Standard	991	2652	2.21	2.21	0.01		M+	N/A	N/A	N/A	N/A	126.1	126.1	-.002 (mmu)	N/A	N/A	N/A	Method	True	False	N/A	N/A	N/A			Pass	Pass	N/A	N/A	N/A	Confirmed	N/A
22	Processed	190419-022		Unknown		287									SCN-Bimane	T1	Target Compound	2143	5887	2.23	2.22	-0.01		M+	29.508	N/A	29.508	N/A	111	111	.000 (mmu)	1.292	1	4558	Method	True	False	N/A	N/A	N/A			Pass	Pass	N/A	N/A	N/A	Confirmed	N/A
22	Processed	190419-022		Unknown		287									SCN-Bimane	T1C1	Target Compound	1114	2878	2.22	2.21	0.01		M+	N/A	N/A	N/A	N/A	124.1	124.1	-.002 (mmu)	1.292	N/A	N/A	Method	True	False	N/A	N/A	N/A			Pass	Pass	N/A	N/A	N/A	Confirmed	N/A
22	Processed	190419-022		Unknown		287									SCN-Bimane IS	T1	Internal Standard	1631	4558	2.24	2.21	-0.03		M+	1	1	1	N/A	111	111	.000 (mmu)	N/A	N/A	N/A	Method	True	False	N/A	N/A	N/A			Pass	Pass	N/A	N/A	N/A	Confirmed	N/A
22	Processed	190419-022		Unknown		287									SCN-Bimane IS	T1C1	Internal Standard	676	1882	2.21	2.22	-0.01		M+	N/A	N/A	N/A	N/A	126.1	126.1	-.002 (mmu)	N/A	N/A	N/A	Method	True	False	N/A	N/A	N/A			Pass	Pass	N/A	N/A	N/A	Confirmed	N/A
23	Processed	190419-023		Unknown		286									SCN-Bimane	T1	Target Compound	3752	9964	2.23	2.21	-0.02		M+	36.772	N/A	36.772	N/A	111	111	.000 (mmu)	1.578	1	6313	Method	True	False	N/A	N/A	N/A			Pass	Pass	N/A	N/A	N/A	Confirmed	N/A
23	Processed	190419-023		Unknown		286									SCN-Bimane	T1C1	Target Compound	1715	4738	2.21	2.21	0.00		M+	N/A	N/A	N/A	N/A	124.1	124.1	-.002 (mmu)	1.578	N/A	N/A	Method	True	False	N/A	N/A	N/A			Pass	Pass	N/A	N/A	N/A	Confirmed	N/A
23	Processed	190419-023		Unknown		286									SCN-Bimane IS	T1	Internal Standard	2199	6313	2.24	2.22	-0.02		M+	1	1	1	N/A	111	111	.000 (mmu)	N/A	N/A	N/A	Method	True	False	N/A	N/A	N/A			Pass	Pass	N/A	N/A	N/A	Confirmed	N/A
23	Processed	190419-023		Unknown		286									SCN-Bimane IS	T1C1	Internal Standard	1139	3037	2.22	2.22	0.00		M+	N/A	N/A	N/A	N/A	126.1	126.1	-.002 (mmu)	N/A	N/A	N/A	Method	True	False	N/A	N/A	N/A			Pass	Pass	N/A	N/A	N/A	Confirmed	N/A
24	Processed	190419-024		Unknown		285									SCN-Bimane	T1	Target Compound	3937	11040	2.23	2.21	-0.02		M+	43.988	N/A	43.988	N/A	111	111	.000 (mmu)	1.863	1	5925	Method	True	False	N/A	N/A	N/A			Pass	Pass	N/A	N/A	N/A	Confirmed	N/A
24	Processed	190419-024		Unknown		285									SCN-Bimane	T1C1	Target Compound	1810	4876	2.21	2.21	0.00		M+	N/A	N/A	N/A	N/A	124.1	124.1	-.002 (mmu)	1.863	N/A	N/A	Method	True	False	N/A	N/A	N/A			Pass	Pass	N/A	N/A	N/A	Confirmed	N/A
24	Processed	190419-024		Unknown		285									SCN-Bimane IS	T1	Internal Standard	2284	5925	2.24	2.21	-0.03		M+	1	1	1	N/A	111	111	.000 (mmu)	N/A	N/A	N/A	Method	True	False	N/A	N/A	N/A			Pass	Pass	N/A	N/A	N/A	Confirmed	N/A
24	Processed	190419-024		Unknown		285									SCN-Bimane IS	T1C1	Internal Standard	973	2728	2.21	2.21	0.00		M+	N/A	N/A	N/A	N/A	126.1	126.1	-.002 (mmu)	N/A	N/A	N/A	Method	True	False	N/A	N/A	N/A			Pass	Pass	N/A	N/A	N/A	Confirmed	N/A
25	Processed	190419-025		Unknown		284									SCN-Bimane	T1	Target Compound	3407	8747	2.23	2.21	-0.02		M+	34.865	N/A	34.865	N/A	111	111	.000 (mmu)	1.503	1	5819	Method	True	False	N/A	N/A	N/A			Pass	Pass	N/A	N/A	N/A	Confirmed	N/A
25	Processed	190419-025		Unknown		284									SCN-Bimane	T1C1	Target Compound	1443	3909	2.21	2.21	0.00		M+	N/A	N/A	N/A	N/A	124.1	124.1	-.002 (mmu)	1.503	N/A	N/A	Method	True	False	N/A	N/A	N/A			Pass	Pass	N/A	N/A	N/A	Confirmed	N/A
25	Processed	190419-025		Unknown		284									SCN-Bimane IS	T1	Internal Standard	2122	5819	2.24	2.21	-0.03		M+	1	1	1	N/A	111	111	.000 (mmu)	N/A	N/A	N/A	Method	True	False	N/A	N/A	N/A			Pass	Pass	N/A	N/A	N/A	Confirmed	N/A
25	Processed	190419-025		Unknown		284									SCN-Bimane IS	T1C1	Internal Standard	1031	2741	2.21	2.21	0.00		M+	N/A	N/A	N/A	N/A	126.1	126.1	-.002 (mmu)	N/A	N/A	N/A	Method	True	False	N/A	N/A	N/A			Pass	Pass	N/A	N/A	N/A	Confirmed	N/A
26	Processed	190419-026		Unknown		283									SCN-Bimane	T1	Target Compound	2208	6439	2.23	2.22	-0.01		M+	38.438	N/A	38.438	N/A	111	111	.000 (mmu)	1.644	1	3916	Method	True	False	N/A	N/A	N/A			Pass	Pass	N/A	N/A	N/A	Confirmed	N/A
26	Processed	190419-026		Unknown		283									SCN-Bimane	T1C1	Target Compound	1162	2854	2.22	2.21	0.00		M+	N/A	N/A	N/A	N/A	124.1	124.1	-.002 (mmu)	1.644	N/A	N/A	Method	True	False	N/A	N/A	N/A			Pass	Pass	N/A	N/A	N/A	Confirmed	N/A
26	Processed	190419-026		Unknown		283									SCN-Bimane IS	T1	Internal Standard	1450	3916	2.24	2.21	-0.03		M+	1	1	1	N/A	111	111	.000 (mmu)	N/A	N/A	N/A	Method	True	False	N/A	N/A	N/A			Pass	Pass	N/A	N/A	N/A	Confirmed	N/A
26	Processed	190419-026		Unknown		283									SCN-Bimane IS	T1C1	Internal Standard	774	1917	2.21	2.21	0.00		M+	N/A	N/A	N/A	N/A	126.1	126.1	-.002 (mmu)	N/A	N/A	N/A	Method	True	False	N/A	N/A	N/A			Pass	Pass	N/A	N/A	N/A	Confirmed	N/A
27	Processed	190419-027		Unknown		282									SCN-Bimane	T1	Target Compound	3053	8312	2.23	2.22	-0.01		M+	36.875	N/A	36.875	N/A	111	111	.000 (mmu)	1.582	1	5252	Method	True	False	N/A	N/A	N/A			Pass	Pass	N/A	N/A	N/A	Confirmed	N/A
27	Processed	190419-027		Unknown		282									SCN-Bimane	T1C1	Target Compound	1399	3820	2.22	2.21	0.00		M+	N/A	N/A	N/A	N/A	124.1	124.1	-.002 (mmu)	1.582	N/A	N/A	Method	True	False	N/A	N/A	N/A			Pass	Pass	N/A	N/A	N/A	Confirmed	N/A
27	Processed	190419-027		Unknown		282									SCN-Bimane IS	T1	Internal Standard	1897	5252	2.24	2.22	-0.02		M+	1	1	1	N/A	111	111	.000 (mmu)	N/A	N/A	N/A	Method	True	False	N/A	N/A	N/A			Pass	Pass	N/A	N/A	N/A	Confirmed	N/A
27	Processed	190419-027		Unknown		282									SCN-Bimane IS	T1C1	Internal Standard	899	2631	2.22	2.22	0.00		M+	N/A	N/A	N/A	N/A	126.1	126.1	-.002 (mmu)	N/A	N/A	N/A	Method	True	False	N/A	N/A	N/A			Pass	Pass	N/A	N/A	N/A	Confirmed	N/A
28	Processed	190419-028		Unknown		281									SCN-Bimane	T1	Target Compound	5821	15047	2.23	2.21	-0.02		M+	56.122	N/A	56.122	N/A	111	111	.000 (mmu)	2.342	1	6423	Method	True	False	N/A	N/A	N/A			Pass	Pass	N/A	N/A	N/A	Confirmed	N/A
28	Processed	190419-028		Unknown		281									SCN-Bimane	T1C1	Target Compound	2635	7213	2.21	2.21	0.00		M+	N/A	N/A	N/A	N/A	124.1	124.1	-.002 (mmu)	2.342	N/A	N/A	Method	True	False	N/A	N/A	N/A			Pass	Pass	N/A	N/A	N/A	Confirmed	N/A
28	Processed	190419-028		Unknown		281									SCN-Bimane IS	T1	Internal Standard	2408	6423	2.24	2.21	-0.03		M+	1	1	1	N/A	111	111	.000 (mmu)	N/A	N/A	N/A	Method	True	False	N/A	N/A	N/A			Pass	Pass	N/A	N/A	N/A	Confirmed	N/A
28	Processed	190419-028		Unknown		281									SCN-Bimane IS	T1C1	Internal Standard	1057	2899	2.21	2.21	0.00		M+	N/A	N/A	N/A	N/A	126.1	126.1	-.002 (mmu)	N/A	N/A	N/A	Method	True	False	N/A	N/A	N/A			Pass	Pass	N/A	N/A	N/A	Confirmed	N/A
29	Processed	190419-029		Unknown		280									SCN-Bimane	T1	Target Compound	5269	14660	2.23	2.21	-0.02		M+	56.713	N/A	56.713	N/A	111	111	.000 (mmu)	2.366	1	6197	Method	True	False	N/A	N/A	N/A			Pass	Pass	N/A	N/A	N/A	Confirmed	N/A
29	Processed	190419-029		Unknown		280									SCN-Bimane	T1C1	Target Compound	2751	6837	2.21	2.21	0.00		M+	N/A	N/A	N/A	N/A	124.1	124.1	-.002 (mmu)	2.366	N/A	N/A	Method	True	False	N/A	N/A	N/A			Pass	Pass	N/A	N/A	N/A	Confirmed	N/A
29	Processed	190419-029		Unknown		280									SCN-Bimane IS	T1	Internal Standard	2365	6197	2.24	2.21	-0.03		M+	1	1	1	N/A	111	111	.000 (mmu)	N/A	N/A	N/A	Method	True	False	N/A	N/A	N/A			Pass	Pass	N/A	N/A	N/A	Confirmed	N/A
29	Processed	190419-029		Unknown		280									SCN-Bimane IS	T1C1	Internal Standard	1044	2930	2.21	2.21	0.00		M+	N/A	N/A	N/A	N/A	126.1	126.1	-.002 (mmu)	N/A	N/A	N/A	Method	True	False	N/A	N/A	N/A			Pass	Pass	N/A	N/A	N/A	Confirmed	N/A
30	Processed	190419-030_20190423095418		Unknown		279									SCN-Bimane	T1	Target Compound	7192	18359	2.23	2.26	0.03		M+	79.848	N/A	79.848	N/A	111	111	.000 (mmu)	3.279	1	5599	Method	True	False	N/A	N/A	N/A			Pass	Pass	N/A	N/A	N/A	Confirmed	N/A
30	Processed	190419-030_20190423095418		Unknown		279									SCN-Bimane	T1C1	Target Compound	3132	8736	2.26	2.27	-0.01		M+	N/A	N/A	N/A	N/A	124.1	124.1	-.002 (mmu)	3.279	N/A	N/A	Method	True	False	N/A	N/A	N/A			Pass	Pass	N/A	N/A	N/A	Confirmed	N/A
30	Processed	190419-030_20190423095418		Unknown		279									SCN-Bimane IS	T1	Internal Standard	2292	5599	2.24	2.26	0.02		M+	1	1	1	N/A	111	111	.000 (mmu)	N/A	N/A	N/A	Method	True	False	N/A	N/A	N/A			Pass	Pass	N/A	N/A	N/A	Confirmed	N/A
30	Processed	190419-030_20190423095418		Unknown		279									SCN-Bimane IS	T1C1	Internal Standard	976	2637	2.26	2.26	0.00		M+	N/A	N/A	N/A	N/A	126.1	126.1	-.002 (mmu)	N/A	N/A	N/A	Method	True	False	N/A	N/A	N/A			Pass	Pass	N/A	N/A	N/A	Confirmed	N/A
31	Processed	190419-031		Unknown		278									SCN-Bimane	T1	Target Compound	3155	7862	2.23	2.22	-0.01		M+	34.346	N/A	34.346	N/A	111	111	.000 (mmu)	1.483	1	5303	Method	True	False	N/A	N/A	N/A			Pass	Pass	N/A	N/A	N/A	Confirmed	N/A
31	Processed	190419-031		Unknown		278									SCN-Bimane	T1C1	Target Compound	1243	3705	2.22	2.22	0.00		M+	N/A	N/A	N/A	N/A	124.1	124.1	-.002 (mmu)	1.483	N/A	N/A	Method	True	False	N/A	N/A	N/A			Pass	Pass	N/A	N/A	N/A	Confirmed	N/A
31	Processed	190419-031		Unknown		278									SCN-Bimane IS	T1	Internal Standard	1960	5303	2.24	2.21	-0.03		M+	1	1	1	N/A	111	111	.000 (mmu)	N/A	N/A	N/A	Method	True	False	N/A	N/A	N/A			Pass	Pass	N/A	N/A	N/A	Confirmed	N/A
31	Processed	190419-031		Unknown		278									SCN-Bimane IS	T1C1	Internal Standard	874	2422	2.21	2.21	0.00		M+	N/A	N/A	N/A	N/A	126.1	126.1	-.002 (mmu)	N/A	N/A	N/A	Method	True	False	N/A	N/A	N/A			Pass	Pass	N/A	N/A	N/A	Confirmed	N/A
32	Processed	190419-032_20190423100707		Unknown		277									SCN-Bimane	T1	Target Compound	5694	14494	2.23	2.26	0.03		M+	60.316	N/A	60.316	N/A	111	111	.000 (mmu)	2.508	1	5779	Method	True	False	N/A	N/A	N/A			Pass	Pass	N/A	N/A	N/A	Confirmed	N/A
32	Processed	190419-032_20190423100707		Unknown		277									SCN-Bimane	T1C1	Target Compound	2510	6677	2.26	2.26	0.00		M+	N/A	N/A	N/A	N/A	124.1	124.1	-.002 (mmu)	2.508	N/A	N/A	Method	True	False	N/A	N/A	N/A			Pass	Pass	N/A	N/A	N/A	Confirmed	N/A
32	Processed	190419-032_20190423100707		Unknown		277									SCN-Bimane IS	T1	Internal Standard	2223	5779	2.24	2.26	0.02		M+	1	1	1	N/A	111	111	.000 (mmu)	N/A	N/A	N/A	Method	True	False	N/A	N/A	N/A			Pass	Pass	N/A	N/A	N/A	Confirmed	N/A
32	Processed	190419-032_20190423100707		Unknown		277									SCN-Bimane IS	T1C1	Internal Standard	1096	2770	2.26	2.27	-0.01		M+	N/A	N/A	N/A	N/A	126.1	126.1	-.002 (mmu)	N/A	N/A	N/A	Method	True	False	N/A	N/A	N/A			Pass	Pass	N/A	N/A	N/A	Confirmed	N/A
33	Processed	190419-033		Unknown		276									SCN-Bimane	T1	Target Compound	5464	14765	2.23	2.21	-0.02		M+	63.879	N/A	63.879	N/A	111	111	.000 (mmu)	2.649	1	5575	Method	True	False	N/A	N/A	N/A			Pass	Pass	N/A	N/A	N/A	Confirmed	N/A
33	Processed	190419-033		Unknown		276									SCN-Bimane	T1C1	Target Compound	2323	6871	2.21	2.21	0.00		M+	N/A	N/A	N/A	N/A	124.1	124.1	-.002 (mmu)	2.649	N/A	N/A	Method	True	False	N/A	N/A	N/A			Pass	Pass	N/A	N/A	N/A	Confirmed	N/A
33	Processed	190419-033		Unknown		276									SCN-Bimane IS	T1	Internal Standard	2069	5575	2.24	2.21	-0.03		M+	1	1	1	N/A	111	111	.000 (mmu)	N/A	N/A	N/A	Method	True	False	N/A	N/A	N/A			Pass	Pass	N/A	N/A	N/A	Confirmed	N/A
33	Processed	190419-033		Unknown		276									SCN-Bimane IS	T1C1	Internal Standard	870	2488	2.21	2.21	0.01		M+	N/A	N/A	N/A	N/A	126.1	126.1	-.002 (mmu)	N/A	N/A	N/A	Method	True	False	N/A	N/A	N/A			Pass	Pass	N/A	N/A	N/A	Confirmed	N/A
34	Processed	190419-034		Unknown		275									SCN-Bimane	T1	Target Compound	5128	14154	2.23	2.2	-0.03		M+	59.048	N/A	59.048	N/A	111	111	.000 (mmu)	2.458	1	5758	Method	True	False	N/A	N/A	N/A			Pass	Pass	N/A	N/A	N/A	Confirmed	N/A
34	Processed	190419-034		Unknown		275									SCN-Bimane	T1C1	Target Compound	2324	6514	2.2	2.22	-0.01		M+	N/A	N/A	N/A	N/A	124.1	124.1	-.002 (mmu)	2.458	N/A	N/A	Method	True	False	N/A	N/A	N/A			Pass	Pass	N/A	N/A	N/A	Confirmed	N/A
34	Processed	190419-034		Unknown		275									SCN-Bimane IS	T1	Internal Standard	2095	5758	2.24	2.21	-0.03		M+	1	1	1	N/A	111	111	.000 (mmu)	N/A	N/A	N/A	Method	True	False	N/A	N/A	N/A			Pass	Pass	N/A	N/A	N/A	Confirmed	N/A
34	Processed	190419-034		Unknown		275									SCN-Bimane IS	T1C1	Internal Standard	1154	2714	2.21	2.21	0.00		M+	N/A	N/A	N/A	N/A	126.1	126.1	-.002 (mmu)	N/A	N/A	N/A	Method	True	False	N/A	N/A	N/A			Pass	Pass	N/A	N/A	N/A	Confirmed	N/A
35	Processed	190419-035		Unknown		274									SCN-Bimane	T1	Target Compound	5363	14931	2.23	2.21	-0.02		M+	57.947	N/A	57.947	N/A	111	111	.000 (mmu)	2.414	1	6184	Method	True	False	N/A	N/A	N/A			Pass	Pass	N/A	N/A	N/A	Confirmed	N/A
35	Processed	190419-035		Unknown		274									SCN-Bimane	T1C1	Target Compound	2426	6850	2.21	2.22	-0.01		M+	N/A	N/A	N/A	N/A	124.1	124.1	-.002 (mmu)	2.414	N/A	N/A	Method	True	False	N/A	N/A	N/A			Pass	Pass	N/A	N/A	N/A	Confirmed	N/A
35	Processed	190419-035		Unknown		274									SCN-Bimane IS	T1	Internal Standard	2292	6184	2.24	2.22	-0.02		M+	1	1	1	N/A	111	111	.000 (mmu)	N/A	N/A	N/A	Method	True	False	N/A	N/A	N/A			Pass	Pass	N/A	N/A	N/A	Confirmed	N/A
35	Processed	190419-035		Unknown		274									SCN-Bimane IS	T1C1	Internal Standard	1000	2631	2.22	2.21	0.01		M+	N/A	N/A	N/A	N/A	126.1	126.1	-.002 (mmu)	N/A	N/A	N/A	Method	True	False	N/A	N/A	N/A			Pass	Pass	N/A	N/A	N/A	Confirmed	N/A
36	Processed	190419-036		Unknown		273									SCN-Bimane	T1	Target Compound	4839	13280	2.23	2.21	-0.02		M+	45.766	N/A	45.766	N/A	111	111	.000 (mmu)	1.934	1	6868	Method	True	False	N/A	N/A	N/A			Pass	Pass	N/A	N/A	N/A	Confirmed	N/A
36	Processed	190419-036		Unknown		273									SCN-Bimane	T1C1	Target Compound	2233	5992	2.21	2.21	0.00		M+	N/A	N/A	N/A	N/A	124.1	124.1	-.002 (mmu)	1.934	N/A	N/A	Method	True	False	N/A	N/A	N/A			Pass	Pass	N/A	N/A	N/A	Confirmed	N/A
36	Processed	190419-036		Unknown		273									SCN-Bimane IS	T1	Internal Standard	2520	6868	2.24	2.22	-0.02		M+	1	1	1	N/A	111	111	.000 (mmu)	N/A	N/A	N/A	Method	True	False	N/A	N/A	N/A			Pass	Pass	N/A	N/A	N/A	Confirmed	N/A
36	Processed	190419-036		Unknown		273									SCN-Bimane IS	T1C1	Internal Standard	1187	3125	2.22	2.22	0.00		M+	N/A	N/A	N/A	N/A	126.1	126.1	-.002 (mmu)	N/A	N/A	N/A	Method	True	False	N/A	N/A	N/A			Pass	Pass	N/A	N/A	N/A	Confirmed	N/A
37	Processed	190419-037		Unknown		272									SCN-Bimane	T1	Target Compound	3753	9846	2.23	2.21	-0.02		M+	40.662	N/A	40.662	N/A	111	111	.000 (mmu)	1.732	1	5685	Method	True	False	N/A	N/A	N/A			Pass	Pass	N/A	N/A	N/A	Confirmed	N/A
37	Processed	190419-037		Unknown		272									SCN-Bimane	T1C1	Target Compound	1727	4602	2.21	2.21	0.00		M+	N/A	N/A	N/A	N/A	124.1	124.1	-.002 (mmu)	1.732	N/A	N/A	Method	True	False	N/A	N/A	N/A			Pass	Pass	N/A	N/A	N/A	Confirmed	N/A
37	Processed	190419-037		Unknown		272									SCN-Bimane IS	T1	Internal Standard	2225	5685	2.24	2.21	-0.03		M+	1	1	1	N/A	111	111	.000 (mmu)	N/A	N/A	N/A	Method	True	False	N/A	N/A	N/A			Pass	Pass	N/A	N/A	N/A	Confirmed	N/A
37	Processed	190419-037		Unknown		272									SCN-Bimane IS	T1C1	Internal Standard	998	2749	2.21	2.21	0.00		M+	N/A	N/A	N/A	N/A	126.1	126.1	-.002 (mmu)	N/A	N/A	N/A	Method	True	False	N/A	N/A	N/A			Pass	Pass	N/A	N/A	N/A	Confirmed	N/A
38	Processed	190419-038		Unknown		271									SCN-Bimane	T1	Target Compound	4674	12822	2.23	2.21	-0.02		M+	50.362	N/A	50.362	N/A	111	111	.000 (mmu)	2.115	1	6063	Method	True	False	N/A	N/A	N/A			Pass	Pass	N/A	N/A	N/A	Confirmed	N/A
38	Processed	190419-038		Unknown		271									SCN-Bimane	T1C1	Target Compound	2186	5858	2.21	2.21	0.00		M+	N/A	N/A	N/A	N/A	124.1	124.1	-.002 (mmu)	2.115	N/A	N/A	Method	True	False	N/A	N/A	N/A			Pass	Pass	N/A	N/A	N/A	Confirmed	N/A
38	Processed	190419-038		Unknown		271									SCN-Bimane IS	T1	Internal Standard	2096	6063	2.24	2.21	-0.03		M+	1	1	1	N/A	111	111	.000 (mmu)	N/A	N/A	N/A	Method	True	False	N/A	N/A	N/A			Pass	Pass	N/A	N/A	N/A	Confirmed	N/A
38	Processed	190419-038		Unknown		271									SCN-Bimane IS	T1C1	Internal Standard	1089	2706	2.21	2.21	0.01		M+	N/A	N/A	N/A	N/A	126.1	126.1	-.002 (mmu)	N/A	N/A	N/A	Method	True	False	N/A	N/A	N/A			Pass	Pass	N/A	N/A	N/A	Confirmed	N/A
39	Processed	190419-039_20190423101829		Unknown		270									SCN-Bimane	T1	Target Compound	1836	5000	2.23	2.26	0.03		M+	42.563	N/A	42.563	N/A	111	111	.000 (mmu)	1.807	1	2767	Method	True	False	N/A	N/A	N/A			Pass	Pass	N/A	N/A	N/A	Confirmed	N/A
39	Processed	190419-039_20190423101829		Unknown		270									SCN-Bimane	T1C1	Target Compound	901	2243	2.26	2.25	0.01		M+	N/A	N/A	N/A	N/A	124.1	124.1	-.002 (mmu)	1.807	N/A	N/A	Method	True	False	N/A	N/A	N/A			Pass	Pass	N/A	N/A	N/A	Confirmed	N/A
39	Processed	190419-039_20190423101829		Unknown		270									SCN-Bimane IS	T1	Internal Standard	1080	2767	2.24	2.27	0.03		M+	1	1	1	N/A	111	111	.000 (mmu)	N/A	N/A	N/A	Method	True	False	N/A	N/A	N/A			Pass	Pass	N/A	N/A	N/A	Confirmed	N/A
39	Processed	190419-039_20190423101829		Unknown		270									SCN-Bimane IS	T1C1	Internal Standard	465	1204	2.27	2.25	0.01		M+	N/A	N/A	N/A	N/A	126.1	126.1	-.002 (mmu)	N/A	N/A	N/A	Method	True	False	N/A	N/A	N/A			Pass	Pass	N/A	N/A	N/A	Confirmed	N/A
40	Processed	190419-040_20190423105240		Unknown		298									SCN-Bimane	T1	Target Compound	2385	6638	2.23	2.26	0.03		M+	32.927	N/A	32.927	N/A	111	111	.000 (mmu)	1.427	1	4653	Method	True	False	N/A	N/A	N/A			Pass	Pass	N/A	N/A	N/A	Confirmed	N/A
40	Processed	190419-040_20190423105240		Unknown		298									SCN-Bimane	T1C1	Target Compound	1231	3084	2.26	2.26	0.00		M+	N/A	N/A	N/A	N/A	124.1	124.1	-.002 (mmu)	1.427	N/A	N/A	Method	True	False	N/A	N/A	N/A			Pass	Pass	N/A	N/A	N/A	Confirmed	N/A
40	Processed	190419-040_20190423105240		Unknown		298									SCN-Bimane IS	T1	Internal Standard	1895	4653	2.24	2.27	0.03		M+	1	1	1	N/A	111	111	.000 (mmu)	N/A	N/A	N/A	Method	True	False	N/A	N/A	N/A			Pass	Pass	N/A	N/A	N/A	Confirmed	N/A
40	Processed	190419-040_20190423105240		Unknown		298									SCN-Bimane IS	T1C1	Internal Standard	796	2213	2.27	2.26	0.01		M+	N/A	N/A	N/A	N/A	126.1	126.1	-.002 (mmu)	N/A	N/A	N/A	Method	True	False	N/A	N/A	N/A			Pass	Pass	N/A	N/A	N/A	Confirmed	N/A
41	Processed	190419-041		Unknown		299									SCN-Bimane	T1	Target Compound	2855	7708	2.23	2.21	-0.02		M+	31.001	N/A	31.001	N/A	111	111	.000 (mmu)	1.351	1	5708	Method	True	False	N/A	N/A	N/A			Pass	Pass	N/A	N/A	N/A	Confirmed	N/A
41	Processed	190419-041		Unknown		299									SCN-Bimane	T1C1	Target Compound	1296	3401	2.21	2.21	0.00		M+	N/A	N/A	N/A	N/A	124.1	124.1	-.002 (mmu)	1.351	N/A	N/A	Method	True	False	N/A	N/A	N/A			Pass	Pass	N/A	N/A	N/A	Confirmed	N/A
41	Processed	190419-041		Unknown		299									SCN-Bimane IS	T1	Internal Standard	2192	5708	2.24	2.21	-0.03		M+	1	1	1	N/A	111	111	.000 (mmu)	N/A	N/A	N/A	Method	True	False	N/A	N/A	N/A			Pass	Pass	N/A	N/A	N/A	Confirmed	N/A
41	Processed	190419-041		Unknown		299									SCN-Bimane IS	T1C1	Internal Standard	1011	2590	2.21	2.2	0.01		M+	N/A	N/A	N/A	N/A	126.1	126.1	-.002 (mmu)	N/A	N/A	N/A	Method	True	False	N/A	N/A	N/A			Pass	Pass	N/A	N/A	N/A	Confirmed	N/A
42	Processed	190419-042		Unknown		300									SCN-Bimane	T1	Target Compound	2392	6246	2.23	2.21	-0.02		M+	32.748	N/A	32.748	N/A	111	111	.000 (mmu)	1.42	1	4400	Method	True	False	N/A	N/A	N/A			Pass	Pass	N/A	N/A	N/A	Confirmed	N/A
42	Processed	190419-042		Unknown		300									SCN-Bimane	T1C1	Target Compound	1069	2710	2.21	2.21	-0.01		M+	N/A	N/A	N/A	N/A	124.1	124.1	-.002 (mmu)	1.42	N/A	N/A	Method	True	False	N/A	N/A	N/A			Pass	Pass	N/A	N/A	N/A	Confirmed	N/A
42	Processed	190419-042		Unknown		300									SCN-Bimane IS	T1	Internal Standard	1824	4400	2.24	2.22	-0.02		M+	1	1	1	N/A	111	111	.000 (mmu)	N/A	N/A	N/A	Method	True	False	N/A	N/A	N/A			Pass	Pass	N/A	N/A	N/A	Confirmed	N/A
42	Processed	190419-042		Unknown		300									SCN-Bimane IS	T1C1	Internal Standard	964	2369	2.22	2.22	0.00		M+	N/A	N/A	N/A	N/A	126.1	126.1	-.002 (mmu)	N/A	N/A	N/A	Method	True	False	N/A	N/A	N/A			Pass	Pass	N/A	N/A	N/A	Confirmed	N/A
43	Processed	190419-043		Unknown		301									SCN-Bimane	T1	Target Compound	3314	9196	2.23	2.21	-0.02		M+	37.978	N/A	37.978	N/A	111	111	.000 (mmu)	1.626	1	5655	Method	True	False	N/A	N/A	N/A			Pass	Pass	N/A	N/A	N/A	Confirmed	N/A
43	Processed	190419-043		Unknown		301									SCN-Bimane	T1C1	Target Compound	1598	4138	2.21	2.21	0.00		M+	N/A	N/A	N/A	N/A	124.1	124.1	-.002 (mmu)	1.626	N/A	N/A	Method	True	False	N/A	N/A	N/A			Pass	Pass	N/A	N/A	N/A	Confirmed	N/A
43	Processed	190419-043		Unknown		301									SCN-Bimane IS	T1	Internal Standard	2072	5655	2.24	2.21	-0.03		M+	1	1	1	N/A	111	111	.000 (mmu)	N/A	N/A	N/A	Method	True	False	N/A	N/A	N/A			Pass	Pass	N/A	N/A	N/A	Confirmed	N/A
43	Processed	190419-043		Unknown		301									SCN-Bimane IS	T1C1	Internal Standard	907	2712	2.21	2.21	0.01		M+	N/A	N/A	N/A	N/A	126.1	126.1	-.002 (mmu)	N/A	N/A	N/A	Method	True	False	N/A	N/A	N/A			Pass	Pass	N/A	N/A	N/A	Confirmed	N/A
44	Processed	190419-044		Unknown		308									SCN-Bimane	T1	Target Compound	1421	4635	2.23	2.21	-0.02		M+	19.171	N/A	19.171	N/A	111	111	.000 (mmu)	0.883	1	5247	Method	True	False	N/A	N/A	N/A			Pass	Pass	N/A	N/A	N/A	Confirmed	N/A
44	Processed	190419-044		Unknown		308									SCN-Bimane	T1C1	Target Compound	748	2019	2.21	2.21	0.00		M+	N/A	N/A	N/A	N/A	124.1	124.1	-.002 (mmu)	0.883	N/A	N/A	Method	True	False	N/A	N/A	N/A			Pass	Pass	N/A	N/A	N/A	Confirmed	N/A
44	Processed	190419-044		Unknown		308									SCN-Bimane IS	T1	Internal Standard	1962	5247	2.24	2.21	-0.03		M+	1	1	1	N/A	111	111	.000 (mmu)	N/A	N/A	N/A	Method	True	False	N/A	N/A	N/A			Pass	Pass	N/A	N/A	N/A	Confirmed	N/A
44	Processed	190419-044		Unknown		308									SCN-Bimane IS	T1C1	Internal Standard	915	2531	2.21	2.21	0.00		M+	N/A	N/A	N/A	N/A	126.1	126.1	-.002 (mmu)	N/A	N/A	N/A	Method	True	False	N/A	N/A	N/A			Pass	Pass	N/A	N/A	N/A	Confirmed	N/A
45	Processed	190419-045		Unknown		309									SCN-Bimane	T1	Target Compound	1995	5122	2.23	2.21	-0.02		M+	22.065	N/A	22.065	N/A	111	111	.000 (mmu)	0.998	1	5134	Method	True	False	N/A	N/A	N/A			Pass	Pass	N/A	N/A	N/A	Confirmed	N/A
45	Processed	190419-045		Unknown		309									SCN-Bimane	T1C1	Target Compound	807	2188	2.21	2.21	0.00		M+	N/A	N/A	N/A	N/A	124.1	124.1	-.002 (mmu)	0.998	N/A	N/A	Method	True	False	N/A	N/A	N/A			Pass	Pass	N/A	N/A	N/A	Confirmed	N/A
45	Processed	190419-045		Unknown		309									SCN-Bimane IS	T1	Internal Standard	2154	5134	2.24	2.21	-0.03		M+	1	1	1	N/A	111	111	.000 (mmu)	N/A	N/A	N/A	Method	True	False	N/A	N/A	N/A			Pass	Pass	N/A	N/A	N/A	Confirmed	N/A
45	Processed	190419-045		Unknown		309									SCN-Bimane IS	T1C1	Internal Standard	1022	2513	2.21	2.21	0.00		M+	N/A	N/A	N/A	N/A	126.1	126.1	-.002 (mmu)	N/A	N/A	N/A	Method	True	False	N/A	N/A	N/A			Pass	Pass	N/A	N/A	N/A	Confirmed	N/A
46	Processed	190419-046		Unknown		296/295									SCN-Bimane	T1	Target Compound	2571	6695	2.23	2.21	-0.02		M+	25.052	N/A	25.052	N/A	111	111	.000 (mmu)	1.116	1	6001	Method	True	False	N/A	N/A	N/A			Pass	Pass	N/A	N/A	N/A	Confirmed	N/A
46	Processed	190419-046		Unknown		296/295									SCN-Bimane	T1C1	Target Compound	1183	3185	2.21	2.21	0.00		M+	N/A	N/A	N/A	N/A	124.1	124.1	-.002 (mmu)	1.116	N/A	N/A	Method	True	False	N/A	N/A	N/A			Pass	Pass	N/A	N/A	N/A	Confirmed	N/A
46	Processed	190419-046		Unknown		296/295									SCN-Bimane IS	T1	Internal Standard	2080	6001	2.24	2.22	-0.02		M+	1	1	1	N/A	111	111	.000 (mmu)	N/A	N/A	N/A	Method	True	False	N/A	N/A	N/A			Pass	Pass	N/A	N/A	N/A	Confirmed	N/A
46	Processed	190419-046		Unknown		296/295									SCN-Bimane IS	T1C1	Internal Standard	994	2740	2.22	2.21	0.01		M+	N/A	N/A	N/A	N/A	126.1	126.1	-.002 (mmu)	N/A	N/A	N/A	Method	True	False	N/A	N/A	N/A			Pass	Pass	N/A	N/A	N/A	Confirmed	N/A
47	Processed	190419-047_20190423110719		Unknown		294/297									SCN-Bimane	T1	Target Compound	12844	34748	2.23	2.26	0.03		M+	93.606	N/A	93.606	N/A	111	111	.000 (mmu)	3.822	1	9090	Method	True	False	N/A	N/A	N/A			Pass	Pass	N/A	N/A	N/A	Confirmed	N/A
47	Processed	190419-047_20190423110719		Unknown		294/297									SCN-Bimane	T1C1	Target Compound	6371	16330	2.26	2.25	0.00		M+	N/A	N/A	N/A	N/A	124.1	124.1	-.002 (mmu)	3.822	N/A	N/A	Method	True	False	N/A	N/A	N/A			Pass	Pass	N/A	N/A	N/A	Confirmed	N/A
47	Processed	190419-047_20190423110719		Unknown		294/297									SCN-Bimane IS	T1	Internal Standard	3612	9090	2.24	2.26	0.02		M+	1	1	1	N/A	111	111	.000 (mmu)	N/A	N/A	N/A	Method	True	False	N/A	N/A	N/A			Pass	Pass	N/A	N/A	N/A	Confirmed	N/A
47	Processed	190419-047_20190423110719		Unknown		294/297									SCN-Bimane IS	T1C1	Internal Standard	1570	4031	2.26	2.26	0.00		M+	N/A	N/A	N/A	N/A	126.1	126.1	-.002 (mmu)	N/A	N/A	N/A	Method	True	False	N/A	N/A	N/A			Pass	Pass	N/A	N/A	N/A	Confirmed	N/A
48	Processed	190419-048		Unknown		266									SCN-Bimane	T1	Target Compound	2030	5243	2.23	2.21	-0.02		M+	21.07	N/A	21.07	N/A	111	111	.000 (mmu)	0.958	1	5470	Method	True	False	N/A	N/A	N/A			Pass	Pass	N/A	N/A	N/A	Confirmed	N/A
48	Processed	190419-048		Unknown		266									SCN-Bimane	T1C1	Target Compound	891	2519	2.21	2.21	0.00		M+	N/A	N/A	N/A	N/A	124.1	124.1	-.002 (mmu)	0.958	N/A	N/A	Method	True	False	N/A	N/A	N/A			Pass	Pass	N/A	N/A	N/A	Confirmed	N/A
48	Processed	190419-048		Unknown		266									SCN-Bimane IS	T1	Internal Standard	1994	5470	2.24	2.21	-0.03		M+	1	1	1	N/A	111	111	.000 (mmu)	N/A	N/A	N/A	Method	True	False	N/A	N/A	N/A			Pass	Pass	N/A	N/A	N/A	Confirmed	N/A
48	Processed	190419-048		Unknown		266									SCN-Bimane IS	T1C1	Internal Standard	992	2825	2.21	2.22	0.00		M+	N/A	N/A	N/A	N/A	126.1	126.1	-.002 (mmu)	N/A	N/A	N/A	Method	True	False	N/A	N/A	N/A			Pass	Pass	N/A	N/A	N/A	Confirmed	N/A
49	Processed	190419-049		Unknown		265									SCN-Bimane	T1	Target Compound	2575	6738	2.23	2.21	-0.02		M+	28.069	N/A	28.069	N/A	111	111	.000 (mmu)	1.235	1	5457	Method	True	False	N/A	N/A	N/A			Pass	Pass	N/A	N/A	N/A	Confirmed	N/A
49	Processed	190419-049		Unknown		265									SCN-Bimane	T1C1	Target Compound	1195	3117	2.21	2.21	0.00		M+	N/A	N/A	N/A	N/A	124.1	124.1	-.002 (mmu)	1.235	N/A	N/A	Method	True	False	N/A	N/A	N/A			Pass	Pass	N/A	N/A	N/A	Confirmed	N/A
49	Processed	190419-049		Unknown		265									SCN-Bimane IS	T1	Internal Standard	2069	5457	2.24	2.21	-0.03		M+	1	1	1	N/A	111	111	.000 (mmu)	N/A	N/A	N/A	Method	True	False	N/A	N/A	N/A			Pass	Pass	N/A	N/A	N/A	Confirmed	N/A
49	Processed	190419-049		Unknown		265									SCN-Bimane IS	T1C1	Internal Standard	902	2572	2.21	2.2	0.01		M+	N/A	N/A	N/A	N/A	126.1	126.1	-.002 (mmu)	N/A	N/A	N/A	Method	True	False	N/A	N/A	N/A			Pass	Pass	N/A	N/A	N/A	Confirmed	N/A
50	Processed	190419-050		Unknown		264									SCN-Bimane	T1	Target Compound	1668	4363	2.23	2.21	-0.02		M+	17.171	N/A	17.171	N/A	111	111	.000 (mmu)	0.804	1	5424	Method	True	False	N/A	N/A	N/A			Pass	Pass	N/A	N/A	N/A	Confirmed	N/A
50	Processed	190419-050		Unknown		264									SCN-Bimane	T1C1	Target Compound	761	1959	2.21	2.22	-0.01		M+	N/A	N/A	N/A	N/A	124.1	124.1	-.002 (mmu)	0.804	N/A	N/A	Method	True	False	N/A	N/A	N/A			Pass	Pass	N/A	N/A	N/A	Confirmed	N/A
50	Processed	190419-050		Unknown		264									SCN-Bimane IS	T1	Internal Standard	2070	5424	2.24	2.21	-0.03		M+	1	1	1	N/A	111	111	.000 (mmu)	N/A	N/A	N/A	Method	True	False	N/A	N/A	N/A			Pass	Pass	N/A	N/A	N/A	Confirmed	N/A
50	Processed	190419-050		Unknown		264									SCN-Bimane IS	T1C1	Internal Standard	1069	2625	2.21	2.22	-0.01		M+	N/A	N/A	N/A	N/A	126.1	126.1	-.002 (mmu)	N/A	N/A	N/A	Method	True	False	N/A	N/A	N/A			Pass	Pass	N/A	N/A	N/A	Confirmed	N/A
51	Processed	190419-051		Unknown		263									SCN-Bimane	T1	Target Compound	3579	9442	2.23	2.21	-0.02		M+	41.995	N/A	41.995	N/A	111	111	.000 (mmu)	1.785	1	5291	Method	True	False	N/A	N/A	N/A			Pass	Pass	N/A	N/A	N/A	Confirmed	N/A
51	Processed	190419-051		Unknown		263									SCN-Bimane	T1C1	Target Compound	1619	4557	2.21	2.22	-0.01		M+	N/A	N/A	N/A	N/A	124.1	124.1	-.002 (mmu)	1.785	N/A	N/A	Method	True	False	N/A	N/A	N/A			Pass	Pass	N/A	N/A	N/A	Confirmed	N/A
51	Processed	190419-051		Unknown		263									SCN-Bimane IS	T1	Internal Standard	1947	5291	2.24	2.22	-0.02		M+	1	1	1	N/A	111	111	.000 (mmu)	N/A	N/A	N/A	Method	True	False	N/A	N/A	N/A			Pass	Pass	N/A	N/A	N/A	Confirmed	N/A
51	Processed	190419-051		Unknown		263									SCN-Bimane IS	T1C1	Internal Standard	998	2672	2.22	2.21	0.00		M+	N/A	N/A	N/A	N/A	126.1	126.1	-.002 (mmu)	N/A	N/A	N/A	Method	True	False	N/A	N/A	N/A			Pass	Pass	N/A	N/A	N/A	Confirmed	N/A
52	Processed	190419-052_20190423112622		Unknown		262									SCN-Bimane	T1	Target Compound	3796	9530	2.23	2.26	0.03		M+	46.665	N/A	46.665	N/A	111	111	.000 (mmu)	1.969	1	4840	Method	True	False	N/A	N/A	N/A			Pass	Pass	N/A	N/A	N/A	Confirmed	N/A
52	Processed	190419-052_20190423112622		Unknown		262									SCN-Bimane	T1C1	Target Compound	1821	4496	2.26	2.25	0.00		M+	N/A	N/A	N/A	N/A	124.1	124.1	-.002 (mmu)	1.969	N/A	N/A	Method	True	False	N/A	N/A	N/A			Pass	Pass	N/A	N/A	N/A	Confirmed	N/A
52	Processed	190419-052_20190423112622		Unknown		262									SCN-Bimane IS	T1	Internal Standard	2001	4840	2.24	2.27	0.03		M+	1	1	1	N/A	111	111	.000 (mmu)	N/A	N/A	N/A	Method	True	False	N/A	N/A	N/A			Pass	Pass	N/A	N/A	N/A	Confirmed	N/A
52	Processed	190419-052_20190423112622		Unknown		262									SCN-Bimane IS	T1C1	Internal Standard	851	2315	2.27	2.27	0.00		M+	N/A	N/A	N/A	N/A	126.1	126.1	-.002 (mmu)	N/A	N/A	N/A	Method	True	False	N/A	N/A	N/A			Pass	Pass	N/A	N/A	N/A	Confirmed	N/A
53	Processed	190419-053		Unknown		261									SCN-Bimane	T1	Target Compound	2878	8516	2.23	2.21	-0.02		M+	30.387	N/A	30.387	N/A	111	111	.000 (mmu)	1.326	1	6421	Method	True	False	N/A	N/A	N/A			Pass	Pass	N/A	N/A	N/A	Confirmed	N/A
53	Processed	190419-053		Unknown		261									SCN-Bimane	T1C1	Target Compound	1492	4103	2.21	2.22	-0.01		M+	N/A	N/A	N/A	N/A	124.1	124.1	-.002 (mmu)	1.326	N/A	N/A	Method	True	False	N/A	N/A	N/A			Pass	Pass	N/A	N/A	N/A	Confirmed	N/A
53	Processed	190419-053		Unknown		261									SCN-Bimane IS	T1	Internal Standard	2250	6421	2.24	2.22	-0.02		M+	1	1	1	N/A	111	111	.000 (mmu)	N/A	N/A	N/A	Method	True	False	N/A	N/A	N/A			Pass	Pass	N/A	N/A	N/A	Confirmed	N/A
53	Processed	190419-053		Unknown		261									SCN-Bimane IS	T1C1	Internal Standard	1224	2974	2.22	2.21	0.00		M+	N/A	N/A	N/A	N/A	126.1	126.1	-.002 (mmu)	N/A	N/A	N/A	Method	True	False	N/A	N/A	N/A			Pass	Pass	N/A	N/A	N/A	Confirmed	N/A
54	Processed	190419-054		Unknown		260									SCN-Bimane	T1	Target Compound	1971	5631	2.23	2.21	-0.02		M+	35.505	N/A	35.505	N/A	111	111	.000 (mmu)	1.528	1	3684	Method	True	False	N/A	N/A	N/A			Pass	Pass	N/A	N/A	N/A	Confirmed	N/A
54	Processed	190419-054		Unknown		260									SCN-Bimane	T1C1	Target Compound	1029	2520	2.21	2.21	0.00		M+	N/A	N/A	N/A	N/A	124.1	124.1	-.002 (mmu)	1.528	N/A	N/A	Method	True	False	N/A	N/A	N/A			Pass	Pass	N/A	N/A	N/A	Confirmed	N/A
54	Processed	190419-054		Unknown		260									SCN-Bimane IS	T1	Internal Standard	1329	3684	2.24	2.22	-0.02		M+	1	1	1	N/A	111	111	.000 (mmu)	N/A	N/A	N/A	Method	True	False	N/A	N/A	N/A			Pass	Pass	N/A	N/A	N/A	Confirmed	N/A
54	Processed	190419-054		Unknown		260									SCN-Bimane IS	T1C1	Internal Standard	655	1693	2.22	2.21	0.01		M+	N/A	N/A	N/A	N/A	126.1	126.1	-.002 (mmu)	N/A	N/A	N/A	Method	True	False	N/A	N/A	N/A			Pass	Pass	N/A	N/A	N/A	Confirmed	N/A
55	Processed	190419-055		Unknown		259									SCN-Bimane	T1	Target Compound	2512	7215	2.23	2.21	-0.02		M+	31.334	N/A	31.334	N/A	111	111	.000 (mmu)	1.364	1	5291	Method	True	False	N/A	N/A	N/A			Pass	Pass	N/A	N/A	N/A	Confirmed	N/A
55	Processed	190419-055		Unknown		259									SCN-Bimane	T1C1	Target Compound	1188	3198	2.21	2.21	0.00		M+	N/A	N/A	N/A	N/A	124.1	124.1	-.002 (mmu)	1.364	N/A	N/A	Method	True	False	N/A	N/A	N/A			Pass	Pass	N/A	N/A	N/A	Confirmed	N/A
55	Processed	190419-055		Unknown		259									SCN-Bimane IS	T1	Internal Standard	1827	5291	2.24	2.21	-0.03		M+	1	1	1	N/A	111	111	.000 (mmu)	N/A	N/A	N/A	Method	True	False	N/A	N/A	N/A			Pass	Pass	N/A	N/A	N/A	Confirmed	N/A
55	Processed	190419-055		Unknown		259									SCN-Bimane IS	T1C1	Internal Standard	812	2387	2.21	2.21	0.00		M+	N/A	N/A	N/A	N/A	126.1	126.1	-.002 (mmu)	N/A	N/A	N/A	Method	True	False	N/A	N/A	N/A			Pass	Pass	N/A	N/A	N/A	Confirmed	N/A
56	Processed	190419-056		Unknown		258									SCN-Bimane	T1	Target Compound	1504	3815	2.23	2.22	-0.01		M+	15.12	N/A	15.12	N/A	111	111	.000 (mmu)	0.724	1	5272	Method	True	False	N/A	N/A	N/A			Pass	Pass	N/A	N/A	N/A	Confirmed	N/A
56	Processed	190419-056		Unknown		258									SCN-Bimane	T1C1	Target Compound	661	1709	2.22	2.21	0.01		M+	N/A	N/A	N/A	N/A	124.1	124.1	-.002 (mmu)	0.724	N/A	N/A	Method	True	False	N/A	N/A	N/A			Pass	Pass	N/A	N/A	N/A	Confirmed	N/A
56	Processed	190419-056		Unknown		258									SCN-Bimane IS	T1	Internal Standard	1899	5272	2.24	2.21	-0.03		M+	1	1	1	N/A	111	111	.000 (mmu)	N/A	N/A	N/A	Method	True	False	N/A	N/A	N/A			Pass	Pass	N/A	N/A	N/A	Confirmed	N/A
56	Processed	190419-056		Unknown		258									SCN-Bimane IS	T1C1	Internal Standard	841	2499	2.21	2.21	0.00		M+	N/A	N/A	N/A	N/A	126.1	126.1	-.002 (mmu)	N/A	N/A	N/A	Method	True	False	N/A	N/A	N/A			Pass	Pass	N/A	N/A	N/A	Confirmed	N/A
57	Processed	190419-057		Unknown		257									SCN-Bimane	T1	Target Compound	1495	4528	2.23	2.22	-0.01		M+	16.254	N/A	16.254	N/A	111	111	.000 (mmu)	0.768	1	5893	Method	True	False	N/A	N/A	N/A			Pass	Pass	N/A	N/A	N/A	Confirmed	N/A
57	Processed	190419-057		Unknown		257									SCN-Bimane	T1C1	Target Compound	924	2207	2.22	2.21	0.00		M+	N/A	N/A	N/A	N/A	124.1	124.1	-.002 (mmu)	0.768	N/A	N/A	Method	True	False	N/A	N/A	N/A			Pass	Pass	N/A	N/A	N/A	Confirmed	N/A
57	Processed	190419-057		Unknown		257									SCN-Bimane IS	T1	Internal Standard	2134	5893	2.24	2.21	-0.03		M+	1	1	1	N/A	111	111	.000 (mmu)	N/A	N/A	N/A	Method	True	False	N/A	N/A	N/A			Pass	Pass	N/A	N/A	N/A	Confirmed	N/A
57	Processed	190419-057		Unknown		257									SCN-Bimane IS	T1C1	Internal Standard	949	2792	2.21	2.21	0.00		M+	N/A	N/A	N/A	N/A	126.1	126.1	-.002 (mmu)	N/A	N/A	N/A	Method	True	False	N/A	N/A	N/A			Pass	Pass	N/A	N/A	N/A	Confirmed	N/A
58	Processed	190419-058_20190423113952		Unknown		256									SCN-Bimane	T1	Target Compound	3297	8301	2.23	2.26	0.03		M+	24.568	N/A	24.568	N/A	111	111	.000 (mmu)	1.097	1	7570	Method	True	False	N/A	N/A	N/A			Pass	Pass	N/A	N/A	N/A	Confirmed	N/A
58	Processed	190419-058_20190423113952		Unknown		256									SCN-Bimane	T1C1	Target Compound	1799	4246	2.26	2.26	0.00		M+	N/A	N/A	N/A	N/A	124.1	124.1	-.002 (mmu)	1.097	N/A	N/A	Method	True	False	N/A	N/A	N/A			Pass	Pass	N/A	N/A	N/A	Confirmed	N/A
58	Processed	190419-058_20190423113952		Unknown		256									SCN-Bimane IS	T1	Internal Standard	3002	7570	2.24	2.26	0.02		M+	1	1	1	N/A	111	111	.000 (mmu)	N/A	N/A	N/A	Method	True	False	N/A	N/A	N/A			Pass	Pass	N/A	N/A	N/A	Confirmed	N/A
58	Processed	190419-058_20190423113952		Unknown		256									SCN-Bimane IS	T1C1	Internal Standard	1434	3723	2.26	2.26	0.00		M+	N/A	N/A	N/A	N/A	126.1	126.1	-.002 (mmu)	N/A	N/A	N/A	Method	True	False	N/A	N/A	N/A			Pass	Pass	N/A	N/A	N/A	Confirmed	N/A
59	Processed	190419-059_20190423122508		Unknown		255									SCN-Bimane	T1	Target Compound	3679	10141	2.23	2.26	0.03		M+	29.871	N/A	29.871	N/A	111	111	.000 (mmu)	1.306	1	7765	Method	True	False	N/A	N/A	N/A			Pass	Pass	N/A	N/A	N/A	Confirmed	N/A
59	Processed	190419-059_20190423122508		Unknown		255									SCN-Bimane	T1C1	Target Compound	1792	4733	2.26	2.26	0.00		M+	N/A	N/A	N/A	N/A	124.1	124.1	-.002 (mmu)	1.306	N/A	N/A	Method	True	False	N/A	N/A	N/A			Pass	Pass	N/A	N/A	N/A	Confirmed	N/A
59	Processed	190419-059_20190423122508		Unknown		255									SCN-Bimane IS	T1	Internal Standard	2916	7765	2.24	2.26	0.02		M+	1	1	1	N/A	111	111	.000 (mmu)	N/A	N/A	N/A	Method	True	False	N/A	N/A	N/A			Pass	Pass	N/A	N/A	N/A	Confirmed	N/A
59	Processed	190419-059_20190423122508		Unknown		255									SCN-Bimane IS	T1C1	Internal Standard	1478	3623	2.26	2.26	0.00		M+	N/A	N/A	N/A	N/A	126.1	126.1	-.002 (mmu)	N/A	N/A	N/A	Method	True	False	N/A	N/A	N/A			Pass	Pass	N/A	N/A	N/A	Confirmed	N/A
60	Processed	190419-060		Unknown		253									SCN-Bimane	T1	Target Compound	945	2744	2.23	2.21	-0.02		M+	10.61	N/A	10.61	N/A	111	111	.000 (mmu)	0.545	1	5031	Method	True	False	N/A	N/A	N/A			Pass	Pass	N/A	N/A	N/A	Confirmed	N/A
60	Processed	190419-060		Unknown		253									SCN-Bimane	T1C1	Target Compound	479	1162	2.21	2.22	0.00		M+	N/A	N/A	N/A	N/A	124.1	124.1	-.002 (mmu)	0.545	N/A	N/A	Method	True	False	N/A	N/A	N/A			Pass	Pass	N/A	N/A	N/A	Confirmed	N/A
60	Processed	190419-060		Unknown		253									SCN-Bimane IS	T1	Internal Standard	1895	5031	2.24	2.22	-0.02		M+	1	1	1	N/A	111	111	.000 (mmu)	N/A	N/A	N/A	Method	True	False	N/A	N/A	N/A			Pass	Pass	N/A	N/A	N/A	Confirmed	N/A
60	Processed	190419-060		Unknown		253									SCN-Bimane IS	T1C1	Internal Standard	878	2470	2.22	2.21	0.00		M+	N/A	N/A	N/A	N/A	126.1	126.1	-.002 (mmu)	N/A	N/A	N/A	Method	True	False	N/A	N/A	N/A			Pass	Pass	N/A	N/A	N/A	Confirmed	N/A
61	Processed	190419-061_20190423125130		Unknown		252									SCN-Bimane	T1	Target Compound	1324	3562	2.23	2.27	0.04		M+	28.378	N/A	28.378	N/A	111	111	.000 (mmu)	1.247	1	2857	Method	True	False	N/A	N/A	N/A			Pass	Pass	N/A	N/A	N/A	Confirmed	N/A
61	Processed	190419-061_20190423125130		Unknown		252									SCN-Bimane	T1C1	Target Compound	712	1705	2.27	2.26	0.01		M+	N/A	N/A	N/A	N/A	124.1	124.1	-.002 (mmu)	1.247	N/A	N/A	Method	True	False	N/A	N/A	N/A			Pass	Pass	N/A	N/A	N/A	Confirmed	N/A
61	Processed	190419-061_20190423125130		Unknown		252									SCN-Bimane IS	T1	Internal Standard	1075	2857	2.24	2.27	0.03		M+	1	1	1	N/A	111	111	.000 (mmu)	N/A	N/A	N/A	Method	True	False	N/A	N/A	N/A			Pass	Pass	N/A	N/A	N/A	Confirmed	N/A
61	Processed	190419-061_20190423125130		Unknown		252									SCN-Bimane IS	T1C1	Internal Standard	579	1163	2.27	2.27	0.01		M+	N/A	N/A	N/A	N/A	126.1	126.1	-.002 (mmu)	N/A	N/A	N/A	Method	True	False	N/A	N/A	N/A			Pass	Pass	N/A	N/A	N/A	Confirmed	N/A
62	Processed	190419-062		Unknown		251									SCN-Bimane	T1	Target Compound	1954	5502	2.23	2.21	-0.02		M+	21.711	N/A	21.711	N/A	111	111	.000 (mmu)	0.984	1	5592	Method	True	False	N/A	N/A	N/A			Pass	Pass	N/A	N/A	N/A	Confirmed	N/A
62	Processed	190419-062		Unknown		251									SCN-Bimane	T1C1	Target Compound	992	2520	2.21	2.21	0.00		M+	N/A	N/A	N/A	N/A	124.1	124.1	-.002 (mmu)	0.984	N/A	N/A	Method	True	False	N/A	N/A	N/A			Pass	Pass	N/A	N/A	N/A	Confirmed	N/A
62	Processed	190419-062		Unknown		251									SCN-Bimane IS	T1	Internal Standard	1996	5592	2.24	2.21	-0.03		M+	1	1	1	N/A	111	111	.000 (mmu)	N/A	N/A	N/A	Method	True	False	N/A	N/A	N/A			Pass	Pass	N/A	N/A	N/A	Confirmed	N/A
62	Processed	190419-062		Unknown		251									SCN-Bimane IS	T1C1	Internal Standard	946	2407	2.21	2.21	0.00		M+	N/A	N/A	N/A	N/A	126.1	126.1	-.002 (mmu)	N/A	N/A	N/A	Method	True	False	N/A	N/A	N/A			Pass	Pass	N/A	N/A	N/A	Confirmed	N/A
63	Processed	190419-063_20190423130228		Unknown		250									SCN-Bimane	T1	Target Compound	7373	19417	2.23	2.26	0.03		M+	79.873	N/A	79.873	N/A	111	111	.000 (mmu)	3.28	1	5919	Method	True	False	N/A	N/A	N/A			Pass	Pass	N/A	N/A	N/A	Confirmed	N/A
63	Processed	190419-063_20190423130228		Unknown		250									SCN-Bimane	T1C1	Target Compound	3267	8598	2.26	2.25	0.00		M+	N/A	N/A	N/A	N/A	124.1	124.1	-.002 (mmu)	3.28	N/A	N/A	Method	True	False	N/A	N/A	N/A			Pass	Pass	N/A	N/A	N/A	Confirmed	N/A
63	Processed	190419-063_20190423130228		Unknown		250									SCN-Bimane IS	T1	Internal Standard	2459	5919	2.24	2.25	0.01		M+	1	1	1	N/A	111	111	.000 (mmu)	N/A	N/A	N/A	Method	True	False	N/A	N/A	N/A			Pass	Pass	N/A	N/A	N/A	Confirmed	N/A
63	Processed	190419-063_20190423130228		Unknown		250									SCN-Bimane IS	T1C1	Internal Standard	1090	2806	2.25	2.26	-0.01		M+	N/A	N/A	N/A	N/A	126.1	126.1	-.002 (mmu)	N/A	N/A	N/A	Method	True	False	N/A	N/A	N/A			Pass	Pass	N/A	N/A	N/A	Confirmed	N/A
64	Processed	190419-064		Unknown		249									SCN-Bimane	T1	Target Compound	3190	9063	2.23	2.21	-0.02		M+	36.967	N/A	36.967	N/A	111	111	.000 (mmu)	1.586	1	5714	Method	True	False	N/A	N/A	N/A			Pass	Pass	N/A	N/A	N/A	Confirmed	N/A
64	Processed	190419-064		Unknown		249									SCN-Bimane	T1C1	Target Compound	1272	3986	2.21	2.22	-0.01		M+	N/A	N/A	N/A	N/A	124.1	124.1	-.002 (mmu)	1.586	N/A	N/A	Method	True	False	N/A	N/A	N/A			Pass	Pass	N/A	N/A	N/A	Confirmed	N/A
64	Processed	190419-064		Unknown		249									SCN-Bimane IS	T1	Internal Standard	2043	5714	2.24	2.21	-0.03		M+	1	1	1	N/A	111	111	.000 (mmu)	N/A	N/A	N/A	Method	True	False	N/A	N/A	N/A			Pass	Pass	N/A	N/A	N/A	Confirmed	N/A
64	Processed	190419-064		Unknown		249									SCN-Bimane IS	T1C1	Internal Standard	903	2507	2.21	2.21	0.00		M+	N/A	N/A	N/A	N/A	126.1	126.1	-.002 (mmu)	N/A	N/A	N/A	Method	True	False	N/A	N/A	N/A			Pass	Pass	N/A	N/A	N/A	Confirmed	N/A
65	Processed	190419-065		Unknown		248									SCN-Bimane	T1	Target Compound	3684	10670	2.23	2.21	-0.02		M+	49.663	N/A	49.663	N/A	111	111	.000 (mmu)	2.087	1	5112	Method	True	False	N/A	N/A	N/A			Pass	Pass	N/A	N/A	N/A	Confirmed	N/A
65	Processed	190419-065		Unknown		248									SCN-Bimane	T1C1	Target Compound	1827	5036	2.21	2.22	0.00		M+	N/A	N/A	N/A	N/A	124.1	124.1	-.002 (mmu)	2.087	N/A	N/A	Method	True	False	N/A	N/A	N/A			Pass	Pass	N/A	N/A	N/A	Confirmed	N/A
65	Processed	190419-065		Unknown		248									SCN-Bimane IS	T1	Internal Standard	1870	5112	2.24	2.22	-0.02		M+	1	1	1	N/A	111	111	.000 (mmu)	N/A	N/A	N/A	Method	True	False	N/A	N/A	N/A			Pass	Pass	N/A	N/A	N/A	Confirmed	N/A
65	Processed	190419-065		Unknown		248									SCN-Bimane IS	T1C1	Internal Standard	890	2446	2.22	2.21	0.01		M+	N/A	N/A	N/A	N/A	126.1	126.1	-.002 (mmu)	N/A	N/A	N/A	Method	True	False	N/A	N/A	N/A			Pass	Pass	N/A	N/A	N/A	Confirmed	N/A
66	Processed	190419-066		Unknown		247									SCN-Bimane	T1	Target Compound	2506	7277	2.23	2.21	-0.02		M+	30.757	N/A	30.757	N/A	111	111	.000 (mmu)	1.341	1	5427	Method	True	False	N/A	N/A	N/A			Pass	Pass	N/A	N/A	N/A	Confirmed	N/A
66	Processed	190419-066		Unknown		247									SCN-Bimane	T1C1	Target Compound	1152	3123	2.21	2.21	0.00		M+	N/A	N/A	N/A	N/A	124.1	124.1	-.002 (mmu)	1.341	N/A	N/A	Method	True	False	N/A	N/A	N/A			Pass	Pass	N/A	N/A	N/A	Confirmed	N/A
66	Processed	190419-066		Unknown		247									SCN-Bimane IS	T1	Internal Standard	1992	5427	2.24	2.21	-0.03		M+	1	1	1	N/A	111	111	.000 (mmu)	N/A	N/A	N/A	Method	True	False	N/A	N/A	N/A			Pass	Pass	N/A	N/A	N/A	Confirmed	N/A
66	Processed	190419-066		Unknown		247									SCN-Bimane IS	T1C1	Internal Standard	998	2539	2.21	2.21	0.00		M+	N/A	N/A	N/A	N/A	126.1	126.1	-.002 (mmu)	N/A	N/A	N/A	Method	True	False	N/A	N/A	N/A			Pass	Pass	N/A	N/A	N/A	Confirmed	N/A
67	Processed	190419-067		Unknown		246									SCN-Bimane	T1	Target Compound	2783	8103	2.23	2.22	-0.01		M+	29.241	N/A	29.241	N/A	111	111	.000 (mmu)	1.281	1	6325	Method	True	False	N/A	N/A	N/A			Pass	Pass	N/A	N/A	N/A	Confirmed	N/A
67	Processed	190419-067		Unknown		246									SCN-Bimane	T1C1	Target Compound	1437	4019	2.22	2.21	0.01		M+	N/A	N/A	N/A	N/A	124.1	124.1	-.002 (mmu)	1.281	N/A	N/A	Method	True	False	N/A	N/A	N/A			Pass	Pass	N/A	N/A	N/A	Confirmed	N/A
67	Processed	190419-067		Unknown		246									SCN-Bimane IS	T1	Internal Standard	2110	6325	2.24	2.21	-0.03		M+	1	1	1	N/A	111	111	.000 (mmu)	N/A	N/A	N/A	Method	True	False	N/A	N/A	N/A			Pass	Pass	N/A	N/A	N/A	Confirmed	N/A
67	Processed	190419-067		Unknown		246									SCN-Bimane IS	T1C1	Internal Standard	1062	3011	2.21	2.21	0.00		M+	N/A	N/A	N/A	N/A	126.1	126.1	-.002 (mmu)	N/A	N/A	N/A	Method	True	False	N/A	N/A	N/A			Pass	Pass	N/A	N/A	N/A	Confirmed	N/A
68	Processed	190419-068		Unknown		245									SCN-Bimane	T1	Target Compound	3133	8619	2.23	2.22	-0.01		M+	27.725	N/A	27.725	N/A	111	111	.000 (mmu)	1.221	1	7058	Method	True	False	N/A	N/A	N/A			Pass	Pass	N/A	N/A	N/A	Confirmed	N/A
68	Processed	190419-068		Unknown		245									SCN-Bimane	T1C1	Target Compound	1269	3743	2.22	2.22	0.00		M+	N/A	N/A	N/A	N/A	124.1	124.1	-.002 (mmu)	1.221	N/A	N/A	Method	True	False	N/A	N/A	N/A			Pass	Pass	N/A	N/A	N/A	Confirmed	N/A
68	Processed	190419-068		Unknown		245									SCN-Bimane IS	T1	Internal Standard	2726	7058	2.24	2.22	-0.02		M+	1	1	1	N/A	111	111	.000 (mmu)	N/A	N/A	N/A	Method	True	False	N/A	N/A	N/A			Pass	Pass	N/A	N/A	N/A	Confirmed	N/A
68	Processed	190419-068		Unknown		245									SCN-Bimane IS	T1C1	Internal Standard	1049	3148	2.22	2.21	0.01		M+	N/A	N/A	N/A	N/A	126.1	126.1	-.002 (mmu)	N/A	N/A	N/A	Method	True	False	N/A	N/A	N/A			Pass	Pass	N/A	N/A	N/A	Confirmed	N/A
69	Processed	190419-069		Unknown		244									SCN-Bimane	T1	Target Compound	2925	8073	2.23	2.21	-0.02		M+	31.592	N/A	31.592	N/A	111	111	.000 (mmu)	1.374	1	5876	Method	True	False	N/A	N/A	N/A			Pass	Pass	N/A	N/A	N/A	Confirmed	N/A
69	Processed	190419-069		Unknown		244									SCN-Bimane	T1C1	Target Compound	1234	3521	2.21	2.22	-0.01		M+	N/A	N/A	N/A	N/A	124.1	124.1	-.002 (mmu)	1.374	N/A	N/A	Method	True	False	N/A	N/A	N/A			Pass	Pass	N/A	N/A	N/A	Confirmed	N/A
69	Processed	190419-069		Unknown		244									SCN-Bimane IS	T1	Internal Standard	2252	5876	2.24	2.21	-0.03		M+	1	1	1	N/A	111	111	.000 (mmu)	N/A	N/A	N/A	Method	True	False	N/A	N/A	N/A			Pass	Pass	N/A	N/A	N/A	Confirmed	N/A
69	Processed	190419-069		Unknown		244									SCN-Bimane IS	T1C1	Internal Standard	1146	2777	2.21	2.21	0.00		M+	N/A	N/A	N/A	N/A	126.1	126.1	-.002 (mmu)	N/A	N/A	N/A	Method	True	False	N/A	N/A	N/A			Pass	Pass	N/A	N/A	N/A	Confirmed	N/A
70	Processed	190419-070		Unknown		243									SCN-Bimane	T1	Target Compound	2528	6783	2.23	2.21	-0.02		M+	27.176	N/A	27.176	N/A	111	111	.000 (mmu)	1.2	1	5655	Method	True	False	N/A	N/A	N/A			Pass	Pass	N/A	N/A	N/A	Confirmed	N/A
70	Processed	190419-070		Unknown		243									SCN-Bimane	T1C1	Target Compound	1023	3134	2.21	2.21	0.00		M+	N/A	N/A	N/A	N/A	124.1	124.1	-.002 (mmu)	1.2	N/A	N/A	Method	True	False	N/A	N/A	N/A			Pass	Pass	N/A	N/A	N/A	Confirmed	N/A
70	Processed	190419-070		Unknown		243									SCN-Bimane IS	T1	Internal Standard	1825	5655	2.24	2.21	-0.03		M+	1	1	1	N/A	111	111	.000 (mmu)	N/A	N/A	N/A	Method	True	False	N/A	N/A	N/A			Pass	Pass	N/A	N/A	N/A	Confirmed	N/A
70	Processed	190419-070		Unknown		243									SCN-Bimane IS	T1C1	Internal Standard	914	2457	2.21	2.21	0.00		M+	N/A	N/A	N/A	N/A	126.1	126.1	-.002 (mmu)	N/A	N/A	N/A	Method	True	False	N/A	N/A	N/A			Pass	Pass	N/A	N/A	N/A	Confirmed	N/A
71	Processed	190419-071		Unknown		242									SCN-Bimane	T1	Target Compound	2876	7914	2.23	2.22	-0.01		M+	31.477	N/A	31.477	N/A	111	111	.000 (mmu)	1.369	1	5779	Method	True	False	N/A	N/A	N/A			Pass	Pass	N/A	N/A	N/A	Confirmed	N/A
71	Processed	190419-071		Unknown		242									SCN-Bimane	T1C1	Target Compound	1424	3703	2.22	2.21	0.00		M+	N/A	N/A	N/A	N/A	124.1	124.1	-.002 (mmu)	1.369	N/A	N/A	Method	True	False	N/A	N/A	N/A			Pass	Pass	N/A	N/A	N/A	Confirmed	N/A
71	Processed	190419-071		Unknown		242									SCN-Bimane IS	T1	Internal Standard	2203	5779	2.24	2.21	-0.03		M+	1	1	1	N/A	111	111	.000 (mmu)	N/A	N/A	N/A	Method	True	False	N/A	N/A	N/A			Pass	Pass	N/A	N/A	N/A	Confirmed	N/A
71	Processed	190419-071		Unknown		242									SCN-Bimane IS	T1C1	Internal Standard	971	2695	2.21	2.21	0.00		M+	N/A	N/A	N/A	N/A	126.1	126.1	-.002 (mmu)	N/A	N/A	N/A	Method	True	False	N/A	N/A	N/A			Pass	Pass	N/A	N/A	N/A	Confirmed	N/A
72	Processed	190419-072		Unknown		241									SCN-Bimane	T1	Target Compound	5656	15246	2.23	2.22	-0.01		M+	62.216	N/A	62.216	N/A	111	111	.000 (mmu)	2.583	1	5902	Method	True	False	N/A	N/A	N/A			Pass	Pass	N/A	N/A	N/A	Confirmed	N/A
72	Processed	190419-072		Unknown		241									SCN-Bimane	T1C1	Target Compound	2526	6796	2.22	2.22	0.00		M+	N/A	N/A	N/A	N/A	124.1	124.1	-.002 (mmu)	2.583	N/A	N/A	Method	True	False	N/A	N/A	N/A			Pass	Pass	N/A	N/A	N/A	Confirmed	N/A
72	Processed	190419-072		Unknown		241									SCN-Bimane IS	T1	Internal Standard	2173	5902	2.24	2.22	-0.02		M+	1	1	1	N/A	111	111	.000 (mmu)	N/A	N/A	N/A	Method	True	False	N/A	N/A	N/A			Pass	Pass	N/A	N/A	N/A	Confirmed	N/A
72	Processed	190419-072		Unknown		241									SCN-Bimane IS	T1C1	Internal Standard	1035	2729	2.22	2.21	0.01		M+	N/A	N/A	N/A	N/A	126.1	126.1	-.002 (mmu)	N/A	N/A	N/A	Method	True	False	N/A	N/A	N/A			Pass	Pass	N/A	N/A	N/A	Confirmed	N/A
73	Processed	190419-073		Unknown		240									SCN-Bimane	T1	Target Compound	6919	18532	2.23	2.21	-0.02		M+	77.468	N/A	77.468	N/A	111	111	.000 (mmu)	3.185	1	5818	Method	True	False	N/A	N/A	N/A			Pass	Pass	N/A	N/A	N/A	Confirmed	N/A
73	Processed	190419-073		Unknown		240									SCN-Bimane	T1C1	Target Compound	2905	8512	2.21	2.21	-0.01		M+	N/A	N/A	N/A	N/A	124.1	124.1	-.002 (mmu)	3.185	N/A	N/A	Method	True	False	N/A	N/A	N/A			Pass	Pass	N/A	N/A	N/A	Confirmed	N/A
73	Processed	190419-073		Unknown		240									SCN-Bimane IS	T1	Internal Standard	1845	5818	2.24	2.22	-0.02		M+	1	1	1	N/A	111	111	.000 (mmu)	N/A	N/A	N/A	Method	True	False	N/A	N/A	N/A			Pass	Pass	N/A	N/A	N/A	Confirmed	N/A
73	Processed	190419-073		Unknown		240									SCN-Bimane IS	T1C1	Internal Standard	1005	2737	2.22	2.21	0.01		M+	N/A	N/A	N/A	N/A	126.1	126.1	-.002 (mmu)	N/A	N/A	N/A	Method	True	False	N/A	N/A	N/A			Pass	Pass	N/A	N/A	N/A	Confirmed	N/A
74	Processed	190419-074		Unknown		239									SCN-Bimane	T1	Target Compound	3469	9934	2.23	2.22	-0.01		M+	39.588	N/A	39.588	N/A	111	111	.000 (mmu)	1.69	1	5880	Method	True	False	N/A	N/A	N/A			Pass	Pass	N/A	N/A	N/A	Confirmed	N/A
74	Processed	190419-074		Unknown		239									SCN-Bimane	T1C1	Target Compound	1467	4730	2.22	2.21	0.00		M+	N/A	N/A	N/A	N/A	124.1	124.1	-.002 (mmu)	1.69	N/A	N/A	Method	True	False	N/A	N/A	N/A			Pass	Pass	N/A	N/A	N/A	Confirmed	N/A
74	Processed	190419-074		Unknown		239									SCN-Bimane IS	T1	Internal Standard	2179	5880	2.24	2.22	-0.02		M+	1	1	1	N/A	111	111	.000 (mmu)	N/A	N/A	N/A	Method	True	False	N/A	N/A	N/A			Pass	Pass	N/A	N/A	N/A	Confirmed	N/A
74	Processed	190419-074		Unknown		239									SCN-Bimane IS	T1C1	Internal Standard	971	2686	2.22	2.22	0.00		M+	N/A	N/A	N/A	N/A	126.1	126.1	-.002 (mmu)	N/A	N/A	N/A	Method	True	False	N/A	N/A	N/A			Pass	Pass	N/A	N/A	N/A	Confirmed	N/A
75	Processed	190419-075		Unknown		238									SCN-Bimane	T1	Target Compound	2702	7315	2.23	2.21	-0.02		M+	31.81	N/A	31.81	N/A	111	111	.000 (mmu)	1.383	1	5291	Method	True	False	N/A	N/A	N/A			Pass	Pass	N/A	N/A	N/A	Confirmed	N/A
75	Processed	190419-075		Unknown		238									SCN-Bimane	T1C1	Target Compound	1258	3399	2.21	2.21	0.00		M+	N/A	N/A	N/A	N/A	124.1	124.1	-.002 (mmu)	1.383	N/A	N/A	Method	True	False	N/A	N/A	N/A			Pass	Pass	N/A	N/A	N/A	Confirmed	N/A
75	Processed	190419-075		Unknown		238									SCN-Bimane IS	T1	Internal Standard	1935	5291	2.24	2.21	-0.03		M+	1	1	1	N/A	111	111	.000 (mmu)	N/A	N/A	N/A	Method	True	False	N/A	N/A	N/A			Pass	Pass	N/A	N/A	N/A	Confirmed	N/A
75	Processed	190419-075		Unknown		238									SCN-Bimane IS	T1C1	Internal Standard	877	2589	2.21	2.21	0.01		M+	N/A	N/A	N/A	N/A	126.1	126.1	-.002 (mmu)	N/A	N/A	N/A	Method	True	False	N/A	N/A	N/A			Pass	Pass	N/A	N/A	N/A	Confirmed	N/A
76	Processed	190419-076_20190423131808		Unknown		237									SCN-Bimane	T1	Target Compound	3489	9231	2.23	2.26	0.03		M+	34.394	N/A	34.394	N/A	111	111	.000 (mmu)	1.485	1	6218	Method	True	False	N/A	N/A	N/A			Pass	Pass	N/A	N/A	N/A	Confirmed	N/A
76	Processed	190419-076_20190423131808		Unknown		237									SCN-Bimane	T1C1	Target Compound	1500	4263	2.26	2.26	0.00		M+	N/A	N/A	N/A	N/A	124.1	124.1	-.002 (mmu)	1.485	N/A	N/A	Method	True	False	N/A	N/A	N/A			Pass	Pass	N/A	N/A	N/A	Confirmed	N/A
76	Processed	190419-076_20190423131808		Unknown		237									SCN-Bimane IS	T1	Internal Standard	2224	6218	2.24	2.27	0.03		M+	1	1	1	N/A	111	111	.000 (mmu)	N/A	N/A	N/A	Method	True	False	N/A	N/A	N/A			Pass	Pass	N/A	N/A	N/A	Confirmed	N/A
76	Processed	190419-076_20190423131808		Unknown		237									SCN-Bimane IS	T1C1	Internal Standard	1111	3162	2.27	2.26	0.01		M+	N/A	N/A	N/A	N/A	126.1	126.1	-.002 (mmu)	N/A	N/A	N/A	Method	True	False	N/A	N/A	N/A			Pass	Pass	N/A	N/A	N/A	Confirmed	N/A
77	Processed	190419-077		Unknown		236									SCN-Bimane	T1	Target Compound	2831	7756	2.23	2.21	-0.02		M+	34.857	N/A	34.857	N/A	111	111	.000 (mmu)	1.503	1	5161	Method	True	False	N/A	N/A	N/A			Pass	Pass	N/A	N/A	N/A	Confirmed	N/A
77	Processed	190419-077		Unknown		236									SCN-Bimane	T1C1	Target Compound	1401	3690	2.21	2.21	0.00		M+	N/A	N/A	N/A	N/A	124.1	124.1	-.002 (mmu)	1.503	N/A	N/A	Method	True	False	N/A	N/A	N/A			Pass	Pass	N/A	N/A	N/A	Confirmed	N/A
77	Processed	190419-077		Unknown		236									SCN-Bimane IS	T1	Internal Standard	1863	5161	2.24	2.21	-0.03		M+	1	1	1	N/A	111	111	.000 (mmu)	N/A	N/A	N/A	Method	True	False	N/A	N/A	N/A			Pass	Pass	N/A	N/A	N/A	Confirmed	N/A
77	Processed	190419-077		Unknown		236									SCN-Bimane IS	T1C1	Internal Standard	941	2470	2.21	2.21	0.01		M+	N/A	N/A	N/A	N/A	126.1	126.1	-.002 (mmu)	N/A	N/A	N/A	Method	True	False	N/A	N/A	N/A			Pass	Pass	N/A	N/A	N/A	Confirmed	N/A
78	Processed	190419-078		Unknown		235									SCN-Bimane	T1	Target Compound	3378	9627	2.23	2.21	-0.02		M+	41.043	N/A	41.043	N/A	111	111	.000 (mmu)	1.747	1	5511	Method	True	False	N/A	N/A	N/A			Pass	Pass	N/A	N/A	N/A	Confirmed	N/A
78	Processed	190419-078		Unknown		235									SCN-Bimane	T1C1	Target Compound	1608	4525	2.21	2.21	0.00		M+	N/A	N/A	N/A	N/A	124.1	124.1	-.002 (mmu)	1.747	N/A	N/A	Method	True	False	N/A	N/A	N/A			Pass	Pass	N/A	N/A	N/A	Confirmed	N/A
78	Processed	190419-078		Unknown		235									SCN-Bimane IS	T1	Internal Standard	2082	5511	2.24	2.21	-0.03		M+	1	1	1	N/A	111	111	.000 (mmu)	N/A	N/A	N/A	Method	True	False	N/A	N/A	N/A			Pass	Pass	N/A	N/A	N/A	Confirmed	N/A
78	Processed	190419-078		Unknown		235									SCN-Bimane IS	T1C1	Internal Standard	842	2366	2.21	2.22	-0.01		M+	N/A	N/A	N/A	N/A	126.1	126.1	-.002 (mmu)	N/A	N/A	N/A	Method	True	False	N/A	N/A	N/A			Pass	Pass	N/A	N/A	N/A	Confirmed	N/A
79	Processed	190419-079		Unknown		234									SCN-Bimane	T1	Target Compound	4388	12347	2.23	2.22	-0.01		M+	50.793	N/A	50.793	N/A	111	111	.000 (mmu)	2.132	1	5791	Method	True	False	N/A	N/A	N/A			Pass	Pass	N/A	N/A	N/A	Confirmed	N/A
79	Processed	190419-079		Unknown		234									SCN-Bimane	T1C1	Target Compound	2228	5846	2.22	2.21	0.00		M+	N/A	N/A	N/A	N/A	124.1	124.1	-.002 (mmu)	2.132	N/A	N/A	Method	True	False	N/A	N/A	N/A			Pass	Pass	N/A	N/A	N/A	Confirmed	N/A
79	Processed	190419-079		Unknown		234									SCN-Bimane IS	T1	Internal Standard	2031	5791	2.24	2.22	-0.02		M+	1	1	1	N/A	111	111	.000 (mmu)	N/A	N/A	N/A	Method	True	False	N/A	N/A	N/A			Pass	Pass	N/A	N/A	N/A	Confirmed	N/A
79	Processed	190419-079		Unknown		234									SCN-Bimane IS	T1C1	Internal Standard	967	2776	2.22	2.22	0.00		M+	N/A	N/A	N/A	N/A	126.1	126.1	-.002 (mmu)	N/A	N/A	N/A	Method	True	False	N/A	N/A	N/A			Pass	Pass	N/A	N/A	N/A	Confirmed	N/A
80	Processed	190419-080		Unknown		233									SCN-Bimane	T1	Target Compound	4184	11986	2.23	2.22	-0.01		M+	49.641	N/A	49.641	N/A	111	111	.000 (mmu)	2.087	1	5745	Method	True	False	N/A	N/A	N/A			Pass	Pass	N/A	N/A	N/A	Confirmed	N/A
80	Processed	190419-080		Unknown		233									SCN-Bimane	T1C1	Target Compound	2037	5550	2.22	2.21	0.00		M+	N/A	N/A	N/A	N/A	124.1	124.1	-.002 (mmu)	2.087	N/A	N/A	Method	True	False	N/A	N/A	N/A			Pass	Pass	N/A	N/A	N/A	Confirmed	N/A
80	Processed	190419-080		Unknown		233									SCN-Bimane IS	T1	Internal Standard	2179	5745	2.24	2.21	-0.03		M+	1	1	1	N/A	111	111	.000 (mmu)	N/A	N/A	N/A	Method	True	False	N/A	N/A	N/A			Pass	Pass	N/A	N/A	N/A	Confirmed	N/A
80	Processed	190419-080		Unknown		233									SCN-Bimane IS	T1C1	Internal Standard	990	2559	2.21	2.22	0.00		M+	N/A	N/A	N/A	N/A	126.1	126.1	-.002 (mmu)	N/A	N/A	N/A	Method	True	False	N/A	N/A	N/A			Pass	Pass	N/A	N/A	N/A	Confirmed	N/A
81	Processed	190419-081		Unknown		232									SCN-Bimane	T1	Target Compound	4396	12418	2.23	2.21	-0.02		M+	54.108	N/A	54.108	N/A	111	111	.000 (mmu)	2.263	1	5488	Method	True	False	N/A	N/A	N/A			Pass	Pass	N/A	N/A	N/A	Confirmed	N/A
81	Processed	190419-081		Unknown		232									SCN-Bimane	T1C1	Target Compound	2019	5448	2.21	2.21	0.00		M+	N/A	N/A	N/A	N/A	124.1	124.1	-.002 (mmu)	2.263	N/A	N/A	Method	True	False	N/A	N/A	N/A			Pass	Pass	N/A	N/A	N/A	Confirmed	N/A
81	Processed	190419-081		Unknown		232									SCN-Bimane IS	T1	Internal Standard	2068	5488	2.24	2.21	-0.03		M+	1	1	1	N/A	111	111	.000 (mmu)	N/A	N/A	N/A	Method	True	False	N/A	N/A	N/A			Pass	Pass	N/A	N/A	N/A	Confirmed	N/A
81	Processed	190419-081		Unknown		232									SCN-Bimane IS	T1C1	Internal Standard	938	2537	2.21	2.21	0.01		M+	N/A	N/A	N/A	N/A	126.1	126.1	-.002 (mmu)	N/A	N/A	N/A	Method	True	False	N/A	N/A	N/A			Pass	Pass	N/A	N/A	N/A	Confirmed	N/A
82	Processed	190419-082		Unknown		231									SCN-Bimane	T1	Target Compound	9211	26174	2.23	2.21	-0.02		M+	109.681	N/A	109.681	N/A	111	111	.000 (mmu)	4.457	1	5872	Method	True	False	N/A	N/A	N/A			Pass	Pass	N/A	N/A	N/A	Confirmed	N/A
82	Processed	190419-082		Unknown		231									SCN-Bimane	T1C1	Target Compound	4367	11682	2.21	2.21	0.00		M+	N/A	N/A	N/A	N/A	124.1	124.1	-.002 (mmu)	4.457	N/A	N/A	Method	True	False	N/A	N/A	N/A			Pass	Pass	N/A	N/A	N/A	Confirmed	N/A
82	Processed	190419-082		Unknown		231									SCN-Bimane IS	T1	Internal Standard	2082	5872	2.24	2.21	-0.03		M+	1	1	1	N/A	111	111	.000 (mmu)	N/A	N/A	N/A	Method	True	False	N/A	N/A	N/A			Pass	Pass	N/A	N/A	N/A	Confirmed	N/A
82	Processed	190419-082		Unknown		231									SCN-Bimane IS	T1C1	Internal Standard	1053	2939	2.21	2.21	0.00		M+	N/A	N/A	N/A	N/A	126.1	126.1	-.002 (mmu)	N/A	N/A	N/A	Method	True	False	N/A	N/A	N/A			Pass	Pass	N/A	N/A	N/A	Confirmed	N/A
83	Processed	190419-083		Unknown		230									SCN-Bimane	T1	Target Compound	7149	18002	2.23	2.21	-0.02		M+	92.439	N/A	92.439	N/A	111	111	.000 (mmu)	3.776	1	4767	Method	True	False	N/A	N/A	N/A			Pass	Pass	N/A	N/A	N/A	Confirmed	N/A
83	Processed	190419-083		Unknown		230									SCN-Bimane	T1C1	Target Compound	2868	8146	2.21	2.21	0.00		M+	N/A	N/A	N/A	N/A	124.1	124.1	-.002 (mmu)	3.776	N/A	N/A	Method	True	False	N/A	N/A	N/A			Pass	Pass	N/A	N/A	N/A	Confirmed	N/A
83	Processed	190419-083		Unknown		230									SCN-Bimane IS	T1	Internal Standard	1941	4767	2.24	2.21	-0.03		M+	1	1	1	N/A	111	111	.000 (mmu)	N/A	N/A	N/A	Method	True	False	N/A	N/A	N/A			Pass	Pass	N/A	N/A	N/A	Confirmed	N/A
83	Processed	190419-083		Unknown		230									SCN-Bimane IS	T1C1	Internal Standard	951	2381	2.21	2.21	0.00		M+	N/A	N/A	N/A	N/A	126.1	126.1	-.002 (mmu)	N/A	N/A	N/A	Method	True	False	N/A	N/A	N/A			Pass	Pass	N/A	N/A	N/A	Confirmed	N/A
84	Processed	190419-084		Unknown		229									SCN-Bimane	T1	Target Compound	8049	21412	2.23	2.21	-0.02		M+	87.614	N/A	87.614	N/A	111	111	.000 (mmu)	3.586	1	5971	Method	True	False	N/A	N/A	N/A			Pass	Pass	N/A	N/A	N/A	Confirmed	N/A
84	Processed	190419-084		Unknown		229									SCN-Bimane	T1C1	Target Compound	3408	9921	2.21	2.21	0.00		M+	N/A	N/A	N/A	N/A	124.1	124.1	-.002 (mmu)	3.586	N/A	N/A	Method	True	False	N/A	N/A	N/A			Pass	Pass	N/A	N/A	N/A	Confirmed	N/A
84	Processed	190419-084		Unknown		229									SCN-Bimane IS	T1	Internal Standard	2165	5971	2.24	2.21	-0.03		M+	1	1	1	N/A	111	111	.000 (mmu)	N/A	N/A	N/A	Method	True	False	N/A	N/A	N/A			Pass	Pass	N/A	N/A	N/A	Confirmed	N/A
84	Processed	190419-084		Unknown		229									SCN-Bimane IS	T1C1	Internal Standard	1028	2738	2.21	2.21	0.00		M+	N/A	N/A	N/A	N/A	126.1	126.1	-.002 (mmu)	N/A	N/A	N/A	Method	True	False	N/A	N/A	N/A			Pass	Pass	N/A	N/A	N/A	Confirmed	N/A
85	Processed	190419-085		Unknown		228									SCN-Bimane	T1	Target Compound	8085	22457	2.23	2.21	-0.02		M+	83.931	N/A	83.931	N/A	111	111	.000 (mmu)	3.44	1	6527	Method	True	False	N/A	N/A	N/A			Pass	Pass	N/A	N/A	N/A	Confirmed	N/A
85	Processed	190419-085		Unknown		228									SCN-Bimane	T1C1	Target Compound	3700	9716	2.21	2.21	0.00		M+	N/A	N/A	N/A	N/A	124.1	124.1	-.002 (mmu)	3.44	N/A	N/A	Method	True	False	N/A	N/A	N/A			Pass	Pass	N/A	N/A	N/A	Confirmed	N/A
85	Processed	190419-085		Unknown		228									SCN-Bimane IS	T1	Internal Standard	2322	6527	2.24	2.21	-0.03		M+	1	1	1	N/A	111	111	.000 (mmu)	N/A	N/A	N/A	Method	True	False	N/A	N/A	N/A			Pass	Pass	N/A	N/A	N/A	Confirmed	N/A
85	Processed	190419-085		Unknown		228									SCN-Bimane IS	T1C1	Internal Standard	1126	2937	2.21	2.21	0.00		M+	N/A	N/A	N/A	N/A	126.1	126.1	-.002 (mmu)	N/A	N/A	N/A	Method	True	False	N/A	N/A	N/A			Pass	Pass	N/A	N/A	N/A	Confirmed	N/A
86	Processed	190419-086_20190423132916		Unknown		227									SCN-Bimane	T1	Target Compound	5647	15551	2.23	2.26	0.03		M+	79.226	N/A	79.226	N/A	111	111	.000 (mmu)	3.255	1	4778	Method	True	False	N/A	N/A	N/A			Pass	Pass	N/A	N/A	N/A	Confirmed	N/A
86	Processed	190419-086_20190423132916		Unknown		227									SCN-Bimane	T1C1	Target Compound	2698	6791	2.26	2.26	0.00		M+	N/A	N/A	N/A	N/A	124.1	124.1	-.002 (mmu)	3.255	N/A	N/A	Method	True	False	N/A	N/A	N/A			Pass	Pass	N/A	N/A	N/A	Confirmed	N/A
86	Processed	190419-086_20190423132916		Unknown		227									SCN-Bimane IS	T1	Internal Standard	1878	4778	2.24	2.26	0.02		M+	1	1	1	N/A	111	111	.000 (mmu)	N/A	N/A	N/A	Method	True	False	N/A	N/A	N/A			Pass	Pass	N/A	N/A	N/A	Confirmed	N/A
86	Processed	190419-086_20190423132916		Unknown		227									SCN-Bimane IS	T1C1	Internal Standard	796	2182	2.26	2.26	0.00		M+	N/A	N/A	N/A	N/A	126.1	126.1	-.002 (mmu)	N/A	N/A	N/A	Method	True	False	N/A	N/A	N/A			Pass	Pass	N/A	N/A	N/A	Confirmed	N/A
87	Processed	190419-087		Unknown		226									SCN-Bimane	T1	Target Compound	9805	25506	2.23	2.22	-0.01		M+	84.056	N/A	84.056	N/A	111	111	.000 (mmu)	3.445	1	7403	Method	True	False	N/A	N/A	N/A			Pass	Pass	N/A	N/A	N/A	Confirmed	N/A
87	Processed	190419-087		Unknown		226									SCN-Bimane	T1C1	Target Compound	4090	11800	2.22	2.22	0.00		M+	N/A	N/A	N/A	N/A	124.1	124.1	-.002 (mmu)	3.445	N/A	N/A	Method	True	False	N/A	N/A	N/A			Pass	Pass	N/A	N/A	N/A	Confirmed	N/A
87	Processed	190419-087		Unknown		226									SCN-Bimane IS	T1	Internal Standard	2592	7403	2.24	2.22	-0.02		M+	1	1	1	N/A	111	111	.000 (mmu)	N/A	N/A	N/A	Method	True	False	N/A	N/A	N/A			Pass	Pass	N/A	N/A	N/A	Confirmed	N/A
87	Processed	190419-087		Unknown		226									SCN-Bimane IS	T1C1	Internal Standard	1195	3532	2.22	2.22	0.00		M+	N/A	N/A	N/A	N/A	126.1	126.1	-.002 (mmu)	N/A	N/A	N/A	Method	True	False	N/A	N/A	N/A			Pass	Pass	N/A	N/A	N/A	Confirmed	N/A
88	Processed	190419-088_20190423133958		Unknown		225									SCN-Bimane	T1	Target Compound	9166	23660	2.23	2.26	0.03		M+	73.481	N/A	73.481	N/A	111	111	.000 (mmu)	3.028	1	7814	Method	True	False	N/A	N/A	N/A			Pass	Pass	N/A	N/A	N/A	Confirmed	N/A
88	Processed	190419-088_20190423133958		Unknown		225									SCN-Bimane	T1C1	Target Compound	4584	11077	2.26	2.25	0.00		M+	N/A	N/A	N/A	N/A	124.1	124.1	-.002 (mmu)	3.028	N/A	N/A	Method	True	False	N/A	N/A	N/A			Pass	Pass	N/A	N/A	N/A	Confirmed	N/A
88	Processed	190419-088_20190423133958		Unknown		225									SCN-Bimane IS	T1	Internal Standard	2972	7814	2.24	2.25	0.01		M+	1	1	1	N/A	111	111	.000 (mmu)	N/A	N/A	N/A	Method	True	False	N/A	N/A	N/A			Pass	Pass	N/A	N/A	N/A	Confirmed	N/A
88	Processed	190419-088_20190423133958		Unknown		225									SCN-Bimane IS	T1C1	Internal Standard	1516	3461	2.25	2.26	0.00		M+	N/A	N/A	N/A	N/A	126.1	126.1	-.002 (mmu)	N/A	N/A	N/A	Method	True	False	N/A	N/A	N/A			Pass	Pass	N/A	N/A	N/A	Confirmed	N/A
89	Processed	190419-089		Unknown		224									SCN-Bimane	T1	Target Compound	4769	13131	2.23	2.21	-0.02		M+	84.961	N/A	84.961	N/A	111	111	.000 (mmu)	3.481	1	3772	Method	True	False	N/A	N/A	N/A			Pass	Pass	N/A	N/A	N/A	Confirmed	N/A
89	Processed	190419-089		Unknown		224									SCN-Bimane	T1C1	Target Compound	2214	6632	2.21	2.21	0.00		M+	N/A	N/A	N/A	N/A	124.1	124.1	-.002 (mmu)	3.481	N/A	N/A	Method	True	False	N/A	N/A	N/A			Pass	Pass	N/A	N/A	N/A	Confirmed	N/A
89	Processed	190419-089		Unknown		224									SCN-Bimane IS	T1	Internal Standard	1313	3772	2.24	2.22	-0.02		M+	1	1	1	N/A	111	111	.000 (mmu)	N/A	N/A	N/A	Method	True	False	N/A	N/A	N/A			Pass	Pass	N/A	N/A	N/A	Confirmed	N/A
89	Processed	190419-089		Unknown		224									SCN-Bimane IS	T1C1	Internal Standard	711	1688	2.22	2.22	0.00		M+	N/A	N/A	N/A	N/A	126.1	126.1	-.002 (mmu)	N/A	N/A	N/A	Method	True	False	N/A	N/A	N/A			Pass	Pass	N/A	N/A	N/A	Confirmed	N/A
90	Processed	190419-090_20190423135210		Unknown		223									SCN-Bimane	T1	Target Compound	6837	18336	2.23	2.26	0.03		M+	58.817	N/A	58.817	N/A	111	111	.000 (mmu)	2.449	1	7488	Method	True	False	N/A	N/A	N/A			Pass	Pass	N/A	N/A	N/A	Confirmed	N/A
90	Processed	190419-090_20190423135210		Unknown		223									SCN-Bimane	T1C1	Target Compound	3392	8530	2.26	2.26	0.00		M+	N/A	N/A	N/A	N/A	124.1	124.1	-.002 (mmu)	2.449	N/A	N/A	Method	True	False	N/A	N/A	N/A			Pass	Pass	N/A	N/A	N/A	Confirmed	N/A
90	Processed	190419-090_20190423135210		Unknown		223									SCN-Bimane IS	T1	Internal Standard	2837	7488	2.24	2.27	0.03		M+	1	1	1	N/A	111	111	.000 (mmu)	N/A	N/A	N/A	Method	True	False	N/A	N/A	N/A			Pass	Pass	N/A	N/A	N/A	Confirmed	N/A
90	Processed	190419-090_20190423135210		Unknown		223									SCN-Bimane IS	T1C1	Internal Standard	1198	3283	2.27	2.27	0.00		M+	N/A	N/A	N/A	N/A	126.1	126.1	-.002 (mmu)	N/A	N/A	N/A	Method	True	False	N/A	N/A	N/A			Pass	Pass	N/A	N/A	N/A	Confirmed	N/A
91	Processed	190419-091		Unknown		222									SCN-Bimane	T1	Target Compound	2327	6772	2.23	2.22	-0.01		M+	48.136	N/A	48.136	N/A	111	111	.000 (mmu)	2.027	1	3341	Method	True	False	N/A	N/A	N/A			Pass	Pass	N/A	N/A	N/A	Confirmed	N/A
91	Processed	190419-091		Unknown		222									SCN-Bimane	T1C1	Target Compound	1146	3015	2.22	2.21	0.00		M+	N/A	N/A	N/A	N/A	124.1	124.1	-.002 (mmu)	2.027	N/A	N/A	Method	True	False	N/A	N/A	N/A			Pass	Pass	N/A	N/A	N/A	Confirmed	N/A
91	Processed	190419-091		Unknown		222									SCN-Bimane IS	T1	Internal Standard	1169	3341	2.24	2.22	-0.02		M+	1	1	1	N/A	111	111	.000 (mmu)	N/A	N/A	N/A	Method	True	False	N/A	N/A	N/A			Pass	Pass	N/A	N/A	N/A	Confirmed	N/A
91	Processed	190419-091		Unknown		222									SCN-Bimane IS	T1C1	Internal Standard	584	1634	2.22	2.21	0.01		M+	N/A	N/A	N/A	N/A	126.1	126.1	-.002 (mmu)	N/A	N/A	N/A	Method	True	False	N/A	N/A	N/A			Pass	Pass	N/A	N/A	N/A	Confirmed	N/A
92	Processed	190419-092		Unknown		221									SCN-Bimane	T1	Target Compound	4348	11249	2.23	2.21	-0.02		M+	47.21	N/A	47.21	N/A	111	111	.000 (mmu)	1.991	1	5651	Method	True	False	N/A	N/A	N/A			Pass	Pass	N/A	N/A	N/A	Confirmed	N/A
92	Processed	190419-092		Unknown		221									SCN-Bimane	T1C1	Target Compound	1926	5169	2.21	2.21	0.00		M+	N/A	N/A	N/A	N/A	124.1	124.1	-.002 (mmu)	1.991	N/A	N/A	Method	True	False	N/A	N/A	N/A			Pass	Pass	N/A	N/A	N/A	Confirmed	N/A
92	Processed	190419-092		Unknown		221									SCN-Bimane IS	T1	Internal Standard	2181	5651	2.24	2.21	-0.03		M+	1	1	1	N/A	111	111	.000 (mmu)	N/A	N/A	N/A	Method	True	False	N/A	N/A	N/A			Pass	Pass	N/A	N/A	N/A	Confirmed	N/A
92	Processed	190419-092		Unknown		221									SCN-Bimane IS	T1C1	Internal Standard	919	2673	2.21	2.2	0.00		M+	N/A	N/A	N/A	N/A	126.1	126.1	-.002 (mmu)	N/A	N/A	N/A	Method	True	False	N/A	N/A	N/A			Pass	Pass	N/A	N/A	N/A	Confirmed	N/A
93	Processed	190419-093		Unknown		220									SCN-Bimane	T1	Target Compound	4283	12095	2.23	2.21	-0.02		M+	52.293	N/A	52.293	N/A	111	111	.000 (mmu)	2.191	1	5520	Method	True	False	N/A	N/A	N/A			Pass	Pass	N/A	N/A	N/A	Confirmed	N/A
93	Processed	190419-093		Unknown		220									SCN-Bimane	T1C1	Target Compound	2199	5704	2.21	2.21	0.01		M+	N/A	N/A	N/A	N/A	124.1	124.1	-.002 (mmu)	2.191	N/A	N/A	Method	True	False	N/A	N/A	N/A			Pass	Pass	N/A	N/A	N/A	Confirmed	N/A
93	Processed	190419-093		Unknown		220									SCN-Bimane IS	T1	Internal Standard	1798	5520	2.24	2.21	-0.03		M+	1	1	1	N/A	111	111	.000 (mmu)	N/A	N/A	N/A	Method	True	False	N/A	N/A	N/A			Pass	Pass	N/A	N/A	N/A	Confirmed	N/A
93	Processed	190419-093		Unknown		220									SCN-Bimane IS	T1C1	Internal Standard	888	2452	2.21	2.21	0.00		M+	N/A	N/A	N/A	N/A	126.1	126.1	-.002 (mmu)	N/A	N/A	N/A	Method	True	False	N/A	N/A	N/A			Pass	Pass	N/A	N/A	N/A	Confirmed	N/A
94	Processed	190419-094		Unknown		254									SCN-Bimane	T1	Target Compound	1334	3854	2.23	2.22	-0.01		M+	7.129	N/A	7.129	N/A	111	111	.000 (mmu)	0.408	1	9447	Method	True	False	N/A	N/A	N/A			Pass	Pass	N/A	N/A	N/A	Confirmed	N/A
94	Processed	190419-094		Unknown		254									SCN-Bimane	T1C1	Target Compound	574	1765	2.22	2.21	0.01		M+	N/A	N/A	N/A	N/A	124.1	124.1	-.002 (mmu)	0.408	N/A	N/A	Method	True	False	N/A	N/A	N/A			Pass	Pass	N/A	N/A	N/A	Confirmed	N/A
94	Processed	190419-094		Unknown		254									SCN-Bimane IS	T1	Internal Standard	3530	9447	2.24	2.21	-0.03		M+	1	1	1	N/A	111	111	.000 (mmu)	N/A	N/A	N/A	Method	True	False	N/A	N/A	N/A			Pass	Pass	N/A	N/A	N/A	Confirmed	N/A
94	Processed	190419-094		Unknown		254									SCN-Bimane IS	T1C1	Internal Standard	1589	4513	2.21	2.22	0.00		M+	N/A	N/A	N/A	N/A	126.1	126.1	-.002 (mmu)	N/A	N/A	N/A	Method	True	False	N/A	N/A	N/A			Pass	Pass	N/A	N/A	N/A	Confirmed	N/A
95	Processed	190419-095_20190423140501		Unknown		Water									SCN-Bimane	T1	Target Compound	136	315	2.23	2.28	0.05		M+	-2.024	N/A	-2.024	N/A	111	111	.000 (mmu)	0.047	1	6763	Method	True	False	N/A	N/A	N/A			Pass	Fail	N/A	N/A	N/A	Identified	N/A
95	Processed	190419-095_20190423140501		Unknown		Water									SCN-Bimane	T1C1	Target Compound	50	57	2.28	2.26	0.02		M+	N/A	N/A	N/A	N/A	124.1	124.1	-.002 (mmu)	0.047	N/A	N/A	Method	True	False	N/A	N/A	N/A			Pass	Fail	N/A	N/A	N/A	Identified	N/A
95	Processed	190419-095_20190423140501		Unknown		Water									SCN-Bimane IS	T1	Internal Standard	2493	6763	2.24	2.27	0.03		M+	1	1	1	N/A	111	111	.000 (mmu)	N/A	N/A	N/A	Method	True	False	N/A	N/A	N/A			Pass	Pass	N/A	N/A	N/A	Confirmed	N/A
95	Processed	190419-095_20190423140501		Unknown		Water									SCN-Bimane IS	T1C1	Internal Standard	1376	3440	2.27	2.26	0.01		M+	N/A	N/A	N/A	N/A	126.1	126.1	-.002 (mmu)	N/A	N/A	N/A	Method	True	False	N/A	N/A	N/A			Pass	Pass	N/A	N/A	N/A	Confirmed	N/A
96	Processed	190419-096		Unknown		Water									SCN-Bimane	T1	Target Compound	80	176	2.23	2.21	-0.02		M+	-2.339	N/A	-2.339	N/A	111	111	.000 (mmu)	0.034	1	5170	Method	True	False	N/A	N/A	N/A			Pass	Pass	N/A	N/A	N/A	Confirmed	N/A
96	Processed	190419-096		Unknown		Water									SCN-Bimane	T1C1	Target Compound	63	71	2.21	2.21	0.00		M+	N/A	N/A	N/A	N/A	124.1	124.1	-.002 (mmu)	0.034	N/A	N/A	Method	True	False	N/A	N/A	N/A			Pass	Pass	N/A	N/A	N/A	Confirmed	N/A
96	Processed	190419-096		Unknown		Water									SCN-Bimane IS	T1	Internal Standard	1878	5170	2.24	2.21	-0.03		M+	1	1	1	N/A	111	111	.000 (mmu)	N/A	N/A	N/A	Method	True	False	N/A	N/A	N/A			Pass	Pass	N/A	N/A	N/A	Confirmed	N/A
96	Processed	190419-096		Unknown		Water									SCN-Bimane IS	T1C1	Internal Standard	792	2361	2.21	2.21	0.00		M+	N/A	N/A	N/A	N/A	126.1	126.1	-.002 (mmu)	N/A	N/A	N/A	Method	True	False	N/A	N/A	N/A			Pass	Pass	N/A	N/A	N/A	Confirmed	N/A
[truncated: 15 more columns]

## Sheet: Data
	Sample ID	Analyte Peak Area	IS Peak Area	Analyte IS Ratio	Calculated Amt	Concentration Ratio
	322	1417	1326	1.06863	23.855	0.0447968
	321	2490	2090	1.19139	26.967	0.0441795
	303	2600	2643	0.983731	21.717	0.0452977
	293	7105	3527	2.01446	47.813	0.0421321
	279	18359	5599	3.27898	79.848	0.0410653
	277	14494	5779	2.50805	60.316	0.0415818
	270	5000	2767	1.80701	42.563	0.042455
	298	6638	4653	1.42661	32.927	0.0433263
	294/297	34748	9090	3.82266	93.606	0.0408378
	262	9530	4840	1.96901	46.665	0.0421945
	256	8301	7570	1.09657	24.568	0.0446339
	255	10141	7765	1.30599	29.871	0.0437209
	252	3562	2857	1.24676	28.378	0.0439341
	250	19417	5919	3.28045	79.873	0.0410709
	237	9231	6218	1.48456	34.394	0.0431634
	227	15551	4778	3.25471	79.226	0.0410813
	225	23660	7814	3.0279	73.481	0.0412066
	223	18336	7488	2.44872	58.817	0.0416328
	Water	315	6763	0.046577	-2.024	-0.0230123
