# Supplementary material for: The determination of thiocyanate in the blood plasma and holding water of Amphiprion clarkii after exposure to cyanide
Source: PeerJ. 2021 Dec 7;9:e12409. doi: 10.7717/peerj.12409 (PMC8663612; doi:10.7717/peerj.12409)
Supplement: Supplemental Information 4 [file peerj-09-12409-s004.xlsx]

## Sheet: All Samples
Batch Order	Status	Filename	Group	Sample Type	Level	Sample ID	Sample Name	Comments	ColumnHeader1	ColumnHeader2	ColumnHeader3	ColumnHeader4	ColumnHeader5	ColumnHeader6	Compound	Peak Label	Type	Height	Area	RT	Actual RT	RT Delta	Formula	Adduct	Calculated Amt	Theoretical Amt	Sample Amt	Std Add Amount	m/z (Expected)	m/z (Apex)	m/z (Delta)	Response Ratio	ISTD Amt	ISTD Response	Integration Mode	Active	Excluded	%Diff	%RSD	% CV	Channel	Final Units	PK	IR	IP	LS	FI	Confirm	Isotopic Pattern Score (%)
1	Processed	190510-001		Matrix Blank		Blank									SCN-Bimane	T1	Target Compound	13	9	2.23	2.22	-0.01		M+	21.858	N/A	21.858	N/A	111	111	.000 (mmu)	1.101	1	8	Method	True	False	N/A	N/A	N/A			Pass	Fail	N/A	N/A	N/A	Identified	N/A
1	Processed	190510-001		Matrix Blank		Blank									SCN-Bimane	T1C1	Target Compound	22	20	2.22	2.25	-0.03		M+	N/A	N/A	N/A	N/A	124.1	124.1	-.002 (mmu)	1.101	N/A	N/A	Method	True	False	N/A	N/A	N/A			Pass	Fail	N/A	N/A	N/A	Identified	N/A
1	Processed	190510-001		Matrix Blank		Blank									SCN-Bimane IS	T1	Internal Standard	14	8	2.24	2.28	0.04		M+	1	1	1	N/A	111	111	.000 (mmu)	N/A	N/A	N/A	Method	True	False	N/A	N/A	N/A			Pass	Fail	N/A	N/A	N/A	Identified	N/A
1	Processed	190510-001		Matrix Blank		Blank									SCN-Bimane IS	T1C1	Internal Standard	42	80	2.28	2.29	-0.01		M+	N/A	N/A	N/A	N/A	126.1	126.1	-.002 (mmu)	N/A	N/A	N/A	Method	True	False	N/A	N/A	N/A			Pass	Fail	N/A	N/A	N/A	Identified	N/A
2	Processed	190510-002		Cal Std	1	5 ppb SCN									SCN-Bimane	T1	Target Compound	738	1675	2.23	2.23	0.00		M+	5.322	5	5.322	N/A	111	111	.000 (mmu)	0.26	1	6441	Method	True	False	6.44	N/A	N/A			Pass	Pass	N/A	N/A	N/A	Confirmed	N/A
2	Processed	190510-002		Cal Std	1	5 ppb SCN									SCN-Bimane	T1C1	Target Compound	363	813	2.23	2.23	0.00		M+	N/A	N/A	N/A	N/A	124.1	124.1	-.002 (mmu)	0.26	N/A	N/A	Method	True	False	N/A	N/A	N/A			Pass	Pass	N/A	N/A	N/A	Confirmed	N/A
2	Processed	190510-002		Cal Std	1	5 ppb SCN									SCN-Bimane IS	T1	Internal Standard	2715	6441	2.24	2.23	-0.01		M+	1	1	1	N/A	111	111	.000 (mmu)	N/A	N/A	N/A	Method	True	False	0	N/A	N/A			Pass	Pass	N/A	N/A	N/A	Confirmed	N/A
2	Processed	190510-002		Cal Std	1	5 ppb SCN									SCN-Bimane IS	T1C1	Internal Standard	1188	3107	2.23	2.24	0.00		M+	N/A	N/A	N/A	N/A	126.1	126.1	-.002 (mmu)	N/A	N/A	N/A	Method	True	False	N/A	N/A	N/A			Pass	Pass	N/A	N/A	N/A	Confirmed	N/A
3	Processed	190510-003		Cal Std	2	10 ppb SCN									SCN-Bimane	T1	Target Compound	1275	2964	2.23	2.23	0.00		M+	9.56	10	9.56	N/A	111	111	.000 (mmu)	0.476	1	6232	Method	True	False	-4.4	N/A	N/A			Pass	Pass	N/A	N/A	N/A	Confirmed	N/A
3	Processed	190510-003		Cal Std	2	10 ppb SCN									SCN-Bimane	T1C1	Target Compound	698	1427	2.23	2.24	0.00		M+	N/A	N/A	N/A	N/A	124.1	124.1	-.002 (mmu)	0.476	N/A	N/A	Method	True	False	N/A	N/A	N/A			Pass	Pass	N/A	N/A	N/A	Confirmed	N/A
3	Processed	190510-003		Cal Std	2	10 ppb SCN									SCN-Bimane IS	T1	Internal Standard	2594	6232	2.24	2.23	-0.01		M+	1	1	1	N/A	111	111	.000 (mmu)	N/A	N/A	N/A	Method	True	False	0	N/A	N/A			Pass	Pass	N/A	N/A	N/A	Confirmed	N/A
3	Processed	190510-003		Cal Std	2	10 ppb SCN									SCN-Bimane IS	T1C1	Internal Standard	1202	3007	2.23	2.23	0.01		M+	N/A	N/A	N/A	N/A	126.1	126.1	-.002 (mmu)	N/A	N/A	N/A	Method	True	False	N/A	N/A	N/A			Pass	Pass	N/A	N/A	N/A	Confirmed	N/A
4	Processed	190510-004		Cal Std	3	25 ppb SCN									SCN-Bimane	T1	Target Compound	3178	7808	2.23	2.24	0.01		M+	25.607	25	25.607	N/A	111	111	.000 (mmu)	1.292	1	6044	Method	True	False	2.43	N/A	N/A			Pass	Pass	N/A	N/A	N/A	Confirmed	N/A
4	Processed	190510-004		Cal Std	3	25 ppb SCN									SCN-Bimane	T1C1	Target Compound	1578	3655	2.24	2.23	0.01		M+	N/A	N/A	N/A	N/A	124.1	124.1	-.002 (mmu)	1.292	N/A	N/A	Method	True	False	N/A	N/A	N/A			Pass	Pass	N/A	N/A	N/A	Confirmed	N/A
4	Processed	190510-004		Cal Std	3	25 ppb SCN									SCN-Bimane IS	T1	Internal Standard	2467	6044	2.24	2.23	-0.01		M+	1	1	1	N/A	111	111	.000 (mmu)	N/A	N/A	N/A	Method	True	False	0	N/A	N/A			Pass	Pass	N/A	N/A	N/A	Confirmed	N/A
4	Processed	190510-004		Cal Std	3	25 ppb SCN									SCN-Bimane IS	T1C1	Internal Standard	1274	3132	2.23	2.23	0.00		M+	N/A	N/A	N/A	N/A	126.1	126.1	-.002 (mmu)	N/A	N/A	N/A	Method	True	False	N/A	N/A	N/A			Pass	Pass	N/A	N/A	N/A	Confirmed	N/A
5	Processed	190510-005		Cal Std	4	50 ppb SCN									SCN-Bimane	T1	Target Compound	6184	15064	2.23	2.23	0.00		M+	44.285	50	44.285	N/A	111	111	.000 (mmu)	2.242	1	6720	Method	True	False	-11.43	N/A	N/A			Pass	Pass	N/A	N/A	N/A	Confirmed	N/A
5	Processed	190510-005		Cal Std	4	50 ppb SCN									SCN-Bimane	T1C1	Target Compound	2842	7061	2.23	2.23	0.00		M+	N/A	N/A	N/A	N/A	124.1	124.1	-.002 (mmu)	2.242	N/A	N/A	Method	True	False	N/A	N/A	N/A			Pass	Pass	N/A	N/A	N/A	Confirmed	N/A
5	Processed	190510-005		Cal Std	4	50 ppb SCN									SCN-Bimane IS	T1	Internal Standard	2781	6720	2.24	2.24	0.00		M+	1	1	1	N/A	111	111	.000 (mmu)	N/A	N/A	N/A	Method	True	False	0	N/A	N/A			Pass	Pass	N/A	N/A	N/A	Confirmed	N/A
5	Processed	190510-005		Cal Std	4	50 ppb SCN									SCN-Bimane IS	T1C1	Internal Standard	1375	3339	2.24	2.23	0.00		M+	N/A	N/A	N/A	N/A	126.1	126.1	-.002 (mmu)	N/A	N/A	N/A	Method	True	False	N/A	N/A	N/A			Pass	Pass	N/A	N/A	N/A	Confirmed	N/A
6	Processed	190510-006		Cal Std	5	100 ppb SCN									SCN-Bimane	T1	Target Compound	13007	31662	2.23	2.23	0.00		M+	80.227	75	80.227	N/A	111	111	.000 (mmu)	4.07	1	7779	Method	True	False	6.97	N/A	N/A			Pass	Pass	N/A	N/A	N/A	Confirmed	N/A
6	Processed	190510-006		Cal Std	5	100 ppb SCN									SCN-Bimane	T1C1	Target Compound	6019	14610	2.23	2.23	0.00		M+	N/A	N/A	N/A	N/A	124.1	124.1	-.002 (mmu)	4.07	N/A	N/A	Method	True	False	N/A	N/A	N/A			Pass	Pass	N/A	N/A	N/A	Confirmed	N/A
6	Processed	190510-006		Cal Std	5	100 ppb SCN									SCN-Bimane IS	T1	Internal Standard	3059	7779	2.24	2.24	0.00		M+	1	1	1	N/A	111	111	.000 (mmu)	N/A	N/A	N/A	Method	True	False	0	N/A	N/A			Pass	Pass	N/A	N/A	N/A	Confirmed	N/A
6	Processed	190510-006		Cal Std	5	100 ppb SCN									SCN-Bimane IS	T1C1	Internal Standard	1381	3620	2.24	2.23	0.01		M+	N/A	N/A	N/A	N/A	126.1	126.1	-.002 (mmu)	N/A	N/A	N/A	Method	True	False	N/A	N/A	N/A			Pass	Pass	N/A	N/A	N/A	Confirmed	N/A
7	Processed	190510-007		Unknown		335									SCN-Bimane	T1	Target Compound	16556	39365	2.23	2.23	0.00		M+	98.619	N/A	98.619	N/A	111	111	.000 (mmu)	5.005	1	7865	Method	True	False	N/A	N/A	N/A			Pass	Pass	N/A	N/A	N/A	Confirmed	N/A
7	Processed	190510-007		Unknown		335									SCN-Bimane	T1C1	Target Compound	7917	18842	2.23	2.23	0.00		M+	N/A	N/A	N/A	N/A	124.1	124.1	-.002 (mmu)	5.005	N/A	N/A	Method	True	False	N/A	N/A	N/A			Pass	Pass	N/A	N/A	N/A	Confirmed	N/A
7	Processed	190510-007		Unknown		335									SCN-Bimane IS	T1	Internal Standard	3443	7865	2.24	2.23	-0.01		M+	1	1	1	N/A	111	111	.000 (mmu)	N/A	N/A	N/A	Method	True	False	N/A	N/A	N/A			Pass	Pass	N/A	N/A	N/A	Confirmed	N/A
7	Processed	190510-007		Unknown		335									SCN-Bimane IS	T1C1	Internal Standard	1488	3775	2.23	2.23	0.00		M+	N/A	N/A	N/A	N/A	126.1	126.1	-.002 (mmu)	N/A	N/A	N/A	Method	True	False	N/A	N/A	N/A			Pass	Pass	N/A	N/A	N/A	Confirmed	N/A
8	Processed	190510-008		Unknown		336									SCN-Bimane	T1	Target Compound	13973	33564	2.23	2.23	0.00		M+	88.201	N/A	88.201	N/A	111	111	.000 (mmu)	4.476	1	7499	Method	True	False	N/A	N/A	N/A			Pass	Pass	N/A	N/A	N/A	Confirmed	N/A
8	Processed	190510-008		Unknown		336									SCN-Bimane	T1C1	Target Compound	6578	15565	2.23	2.23	0.00		M+	N/A	N/A	N/A	N/A	124.1	124.1	-.002 (mmu)	4.476	N/A	N/A	Method	True	False	N/A	N/A	N/A			Pass	Pass	N/A	N/A	N/A	Confirmed	N/A
8	Processed	190510-008		Unknown		336									SCN-Bimane IS	T1	Internal Standard	2994	7499	2.24	2.23	-0.01		M+	1	1	1	N/A	111	111	.000 (mmu)	N/A	N/A	N/A	Method	True	False	N/A	N/A	N/A			Pass	Pass	N/A	N/A	N/A	Confirmed	N/A
8	Processed	190510-008		Unknown		336									SCN-Bimane IS	T1C1	Internal Standard	1585	3829	2.23	2.23	0.00		M+	N/A	N/A	N/A	N/A	126.1	126.1	-.002 (mmu)	N/A	N/A	N/A	Method	True	False	N/A	N/A	N/A			Pass	Pass	N/A	N/A	N/A	Confirmed	N/A
9	Processed	190510-009		Unknown		337									SCN-Bimane	T1	Target Compound	13193	31317	2.23	2.23	0.00		M+	77.29	N/A	77.29	N/A	111	111	.000 (mmu)	3.921	1	7988	Method	True	False	N/A	N/A	N/A			Pass	Pass	N/A	N/A	N/A	Confirmed	N/A
9	Processed	190510-009		Unknown		337									SCN-Bimane	T1C1	Target Compound	5871	14562	2.23	2.23	0.00		M+	N/A	N/A	N/A	N/A	124.1	124.1	-.002 (mmu)	3.921	N/A	N/A	Method	True	False	N/A	N/A	N/A			Pass	Pass	N/A	N/A	N/A	Confirmed	N/A
9	Processed	190510-009		Unknown		337									SCN-Bimane IS	T1	Internal Standard	3257	7988	2.24	2.24	0.00		M+	1	1	1	N/A	111	111	.000 (mmu)	N/A	N/A	N/A	Method	True	False	N/A	N/A	N/A			Pass	Pass	N/A	N/A	N/A	Confirmed	N/A
9	Processed	190510-009		Unknown		337									SCN-Bimane IS	T1C1	Internal Standard	1499	3771	2.24	2.23	0.00		M+	N/A	N/A	N/A	N/A	126.1	126.1	-.002 (mmu)	N/A	N/A	N/A	Method	True	False	N/A	N/A	N/A			Pass	Pass	N/A	N/A	N/A	Confirmed	N/A
10	Processed	190510-010		Unknown		338									SCN-Bimane	T1	Target Compound	12154	29577	2.23	2.23	0.00		M+	82.312	N/A	82.312	N/A	111	111	.000 (mmu)	4.176	1	7083	Method	True	False	N/A	N/A	N/A			Pass	Pass	N/A	N/A	N/A	Confirmed	N/A
10	Processed	190510-010		Unknown		338									SCN-Bimane	T1C1	Target Compound	5592	14052	2.23	2.23	0.00		M+	N/A	N/A	N/A	N/A	124.1	124.1	-.002 (mmu)	4.176	N/A	N/A	Method	True	False	N/A	N/A	N/A			Pass	Pass	N/A	N/A	N/A	Confirmed	N/A
10	Processed	190510-010		Unknown		338									SCN-Bimane IS	T1	Internal Standard	2857	7083	2.24	2.23	-0.01		M+	1	1	1	N/A	111	111	.000 (mmu)	N/A	N/A	N/A	Method	True	False	N/A	N/A	N/A			Pass	Pass	N/A	N/A	N/A	Confirmed	N/A
10	Processed	190510-010		Unknown		338									SCN-Bimane IS	T1C1	Internal Standard	1496	3835	2.23	2.23	0.01		M+	N/A	N/A	N/A	N/A	126.1	126.1	-.002 (mmu)	N/A	N/A	N/A	Method	True	False	N/A	N/A	N/A			Pass	Pass	N/A	N/A	N/A	Confirmed	N/A
11	Processed	190510-011		Unknown		339									SCN-Bimane	T1	Target Compound	10133	25783	2.23	2.22	-0.01		M+	68.941	N/A	68.941	N/A	111	111	.000 (mmu)	3.496	1	7375	Method	True	False	N/A	N/A	N/A			Pass	Pass	N/A	N/A	N/A	Confirmed	N/A
11	Processed	190510-011		Unknown		339									SCN-Bimane	T1C1	Target Compound	5015	12075	2.22	2.23	-0.01		M+	N/A	N/A	N/A	N/A	124.1	124.1	-.002 (mmu)	3.496	N/A	N/A	Method	True	False	N/A	N/A	N/A			Pass	Pass	N/A	N/A	N/A	Confirmed	N/A
11	Processed	190510-011		Unknown		339									SCN-Bimane IS	T1	Internal Standard	2937	7375	2.24	2.23	-0.01		M+	1	1	1	N/A	111	111	.000 (mmu)	N/A	N/A	N/A	Method	True	False	N/A	N/A	N/A			Pass	Pass	N/A	N/A	N/A	Confirmed	N/A
11	Processed	190510-011		Unknown		339									SCN-Bimane IS	T1C1	Internal Standard	1408	3628	2.23	2.23	0.01		M+	N/A	N/A	N/A	N/A	126.1	126.1	-.002 (mmu)	N/A	N/A	N/A	Method	True	False	N/A	N/A	N/A			Pass	Pass	N/A	N/A	N/A	Confirmed	N/A
12	Processed	190510-012		Unknown		340									SCN-Bimane	T1	Target Compound	9556	22073	2.23	2.23	0.00		M+	60.02	N/A	60.02	N/A	111	111	.000 (mmu)	3.042	1	7256	Method	True	False	N/A	N/A	N/A			Pass	Pass	N/A	N/A	N/A	Confirmed	N/A
12	Processed	190510-012		Unknown		340									SCN-Bimane	T1C1	Target Compound	4665	10310	2.23	2.23	0.00		M+	N/A	N/A	N/A	N/A	124.1	124.1	-.002 (mmu)	3.042	N/A	N/A	Method	True	False	N/A	N/A	N/A			Pass	Pass	N/A	N/A	N/A	Confirmed	N/A
12	Processed	190510-012		Unknown		340									SCN-Bimane IS	T1	Internal Standard	2859	7256	2.24	2.23	-0.01		M+	1	1	1	N/A	111	111	.000 (mmu)	N/A	N/A	N/A	Method	True	False	N/A	N/A	N/A			Pass	Pass	N/A	N/A	N/A	Confirmed	N/A
12	Processed	190510-012		Unknown		340									SCN-Bimane IS	T1C1	Internal Standard	1329	3303	2.23	2.23	0.00		M+	N/A	N/A	N/A	N/A	126.1	126.1	-.002 (mmu)	N/A	N/A	N/A	Method	True	False	N/A	N/A	N/A			Pass	Pass	N/A	N/A	N/A	Confirmed	N/A
13	Processed	190510-013		Unknown		341									SCN-Bimane	T1	Target Compound	16318	40338	2.23	2.23	0.00		M+	97.301	N/A	97.301	N/A	111	111	.000 (mmu)	4.938	1	8168	Method	True	False	N/A	N/A	N/A			Pass	Pass	N/A	N/A	N/A	Confirmed	N/A
13	Processed	190510-013		Unknown		341									SCN-Bimane	T1C1	Target Compound	7520	18695	2.23	2.23	0.00		M+	N/A	N/A	N/A	N/A	124.1	124.1	-.002 (mmu)	4.938	N/A	N/A	Method	True	False	N/A	N/A	N/A			Pass	Pass	N/A	N/A	N/A	Confirmed	N/A
13	Processed	190510-013		Unknown		341									SCN-Bimane IS	T1	Internal Standard	3549	8168	2.24	2.23	-0.01		M+	1	1	1	N/A	111	111	.000 (mmu)	N/A	N/A	N/A	Method	True	False	N/A	N/A	N/A			Pass	Pass	N/A	N/A	N/A	Confirmed	N/A
13	Processed	190510-013		Unknown		341									SCN-Bimane IS	T1C1	Internal Standard	1574	4205	2.23	2.23	0.01		M+	N/A	N/A	N/A	N/A	126.1	126.1	-.002 (mmu)	N/A	N/A	N/A	Method	True	False	N/A	N/A	N/A			Pass	Pass	N/A	N/A	N/A	Confirmed	N/A
14	Processed	190510-014		Unknown		342									SCN-Bimane	T1	Target Compound	18262	42991	2.23	2.23	0.00		M+	104.973	N/A	104.973	N/A	111	111	.000 (mmu)	5.329	1	8068	Method	True	False	N/A	N/A	N/A			Pass	Pass	N/A	N/A	N/A	Confirmed	N/A
14	Processed	190510-014		Unknown		342									SCN-Bimane	T1C1	Target Compound	7831	19967	2.23	2.23	0.00		M+	N/A	N/A	N/A	N/A	124.1	124.1	-.002 (mmu)	5.329	N/A	N/A	Method	True	False	N/A	N/A	N/A			Pass	Pass	N/A	N/A	N/A	Confirmed	N/A
14	Processed	190510-014		Unknown		342									SCN-Bimane IS	T1	Internal Standard	3240	8068	2.24	2.23	-0.01		M+	1	1	1	N/A	111	111	.000 (mmu)	N/A	N/A	N/A	Method	True	False	N/A	N/A	N/A			Pass	Pass	N/A	N/A	N/A	Confirmed	N/A
14	Processed	190510-014		Unknown		342									SCN-Bimane IS	T1C1	Internal Standard	1735	4093	2.23	2.24	0.00		M+	N/A	N/A	N/A	N/A	126.1	126.1	-.002 (mmu)	N/A	N/A	N/A	Method	True	False	N/A	N/A	N/A			Pass	Pass	N/A	N/A	N/A	Confirmed	N/A
15	Processed	190510-015		Unknown		343									SCN-Bimane	T1	Target Compound	12724	30533	2.23	2.23	0.00		M+	78.356	N/A	78.356	N/A	111	111	.000 (mmu)	3.975	1	7682	Method	True	False	N/A	N/A	N/A			Pass	Pass	N/A	N/A	N/A	Confirmed	N/A
15	Processed	190510-015		Unknown		343									SCN-Bimane	T1C1	Target Compound	5911	14160	2.23	2.23	0.00		M+	N/A	N/A	N/A	N/A	124.1	124.1	-.002 (mmu)	3.975	N/A	N/A	Method	True	False	N/A	N/A	N/A			Pass	Pass	N/A	N/A	N/A	Confirmed	N/A
15	Processed	190510-015		Unknown		343									SCN-Bimane IS	T1	Internal Standard	3114	7682	2.24	2.23	-0.01		M+	1	1	1	N/A	111	111	.000 (mmu)	N/A	N/A	N/A	Method	True	False	N/A	N/A	N/A			Pass	Pass	N/A	N/A	N/A	Confirmed	N/A
15	Processed	190510-015		Unknown		343									SCN-Bimane IS	T1C1	Internal Standard	1598	3807	2.23	2.23	0.00		M+	N/A	N/A	N/A	N/A	126.1	126.1	-.002 (mmu)	N/A	N/A	N/A	Method	True	False	N/A	N/A	N/A			Pass	Pass	N/A	N/A	N/A	Confirmed	N/A
16	Processed	190510-016		Unknown		344									SCN-Bimane	T1	Target Compound	6114	14706	2.23	2.23	0.00		M+	43.111	N/A	43.111	N/A	111	111	.000 (mmu)	2.182	1	6739	Method	True	False	N/A	N/A	N/A			Pass	Pass	N/A	N/A	N/A	Confirmed	N/A
16	Processed	190510-016		Unknown		344									SCN-Bimane	T1C1	Target Compound	2968	7057	2.23	2.23	0.00		M+	N/A	N/A	N/A	N/A	124.1	124.1	-.002 (mmu)	2.182	N/A	N/A	Method	True	False	N/A	N/A	N/A			Pass	Pass	N/A	N/A	N/A	Confirmed	N/A
16	Processed	190510-016		Unknown		344									SCN-Bimane IS	T1	Internal Standard	2772	6739	2.24	2.23	-0.01		M+	1	1	1	N/A	111	111	.000 (mmu)	N/A	N/A	N/A	Method	True	False	N/A	N/A	N/A			Pass	Pass	N/A	N/A	N/A	Confirmed	N/A
16	Processed	190510-016		Unknown		344									SCN-Bimane IS	T1C1	Internal Standard	1424	3436	2.23	2.23	0.00		M+	N/A	N/A	N/A	N/A	126.1	126.1	-.002 (mmu)	N/A	N/A	N/A	Method	True	False	N/A	N/A	N/A			Pass	Pass	N/A	N/A	N/A	Confirmed	N/A
17	Processed	190510-017		Unknown		345									SCN-Bimane	T1	Target Compound	6536	16559	2.23	2.23	0.00		M+	45.991	N/A	45.991	N/A	111	111	.000 (mmu)	2.329	1	7111	Method	True	False	N/A	N/A	N/A			Pass	Pass	N/A	N/A	N/A	Confirmed	N/A
17	Processed	190510-017		Unknown		345									SCN-Bimane	T1C1	Target Compound	3137	7925	2.23	2.23	0.01		M+	N/A	N/A	N/A	N/A	124.1	124.1	-.002 (mmu)	2.329	N/A	N/A	Method	True	False	N/A	N/A	N/A			Pass	Pass	N/A	N/A	N/A	Confirmed	N/A
17	Processed	190510-017		Unknown		345									SCN-Bimane IS	T1	Internal Standard	3083	7111	2.24	2.23	-0.01		M+	1	1	1	N/A	111	111	.000 (mmu)	N/A	N/A	N/A	Method	True	False	N/A	N/A	N/A			Pass	Pass	N/A	N/A	N/A	Confirmed	N/A
17	Processed	190510-017		Unknown		345									SCN-Bimane IS	T1C1	Internal Standard	1321	3491	2.23	2.22	0.01		M+	N/A	N/A	N/A	N/A	126.1	126.1	-.002 (mmu)	N/A	N/A	N/A	Method	True	False	N/A	N/A	N/A			Pass	Pass	N/A	N/A	N/A	Confirmed	N/A
18	Processed	190510-018		Unknown		346									SCN-Bimane	T1	Target Compound	18554	45077	2.23	2.23	0.00		M+	109.84	N/A	109.84	N/A	111	111	.000 (mmu)	5.576	1	8084	Method	True	False	N/A	N/A	N/A			Pass	Pass	N/A	N/A	N/A	Confirmed	N/A
18	Processed	190510-018		Unknown		346									SCN-Bimane	T1C1	Target Compound	8191	20275	2.23	2.23	0.00		M+	N/A	N/A	N/A	N/A	124.1	124.1	-.002 (mmu)	5.576	N/A	N/A	Method	True	False	N/A	N/A	N/A			Pass	Pass	N/A	N/A	N/A	Confirmed	N/A
18	Processed	190510-018		Unknown		346									SCN-Bimane IS	T1	Internal Standard	3353	8084	2.24	2.23	-0.01		M+	1	1	1	N/A	111	111	.000 (mmu)	N/A	N/A	N/A	Method	True	False	N/A	N/A	N/A			Pass	Pass	N/A	N/A	N/A	Confirmed	N/A
18	Processed	190510-018		Unknown		346									SCN-Bimane IS	T1C1	Internal Standard	1508	3892	2.23	2.23	0.00		M+	N/A	N/A	N/A	N/A	126.1	126.1	-.002 (mmu)	N/A	N/A	N/A	Method	True	False	N/A	N/A	N/A			Pass	Pass	N/A	N/A	N/A	Confirmed	N/A
19	Processed	190510-019		Unknown		347									SCN-Bimane	T1	Target Compound	2160	5341	2.23	2.24	0.01		M+	16.075	N/A	16.075	N/A	111	111	.000 (mmu)	0.807	1	6619	Method	True	False	N/A	N/A	N/A			Pass	Pass	N/A	N/A	N/A	Confirmed	N/A
19	Processed	190510-019		Unknown		347									SCN-Bimane	T1C1	Target Compound	1067	2658	2.24	2.23	0.01		M+	N/A	N/A	N/A	N/A	124.1	124.1	-.002 (mmu)	0.807	N/A	N/A	Method	True	False	N/A	N/A	N/A			Pass	Pass	N/A	N/A	N/A	Confirmed	N/A
19	Processed	190510-019		Unknown		347									SCN-Bimane IS	T1	Internal Standard	2890	6619	2.24	2.23	-0.01		M+	1	1	1	N/A	111	111	.000 (mmu)	N/A	N/A	N/A	Method	True	False	N/A	N/A	N/A			Pass	Pass	N/A	N/A	N/A	Confirmed	N/A
19	Processed	190510-019		Unknown		347									SCN-Bimane IS	T1C1	Internal Standard	1354	3315	2.23	2.23	0.00		M+	N/A	N/A	N/A	N/A	126.1	126.1	-.002 (mmu)	N/A	N/A	N/A	Method	True	False	N/A	N/A	N/A			Pass	Pass	N/A	N/A	N/A	Confirmed	N/A
20	Processed	190510-020		Unknown		348									SCN-Bimane	T1	Target Compound	2747	6672	2.23	2.23	0.00		M+	20.794	N/A	20.794	N/A	111	111	.000 (mmu)	1.047	1	6373	Method	True	False	N/A	N/A	N/A			Pass	Pass	N/A	N/A	N/A	Confirmed	N/A
20	Processed	190510-020		Unknown		348									SCN-Bimane	T1C1	Target Compound	1261	3184	2.23	2.23	-0.01		M+	N/A	N/A	N/A	N/A	124.1	124.1	-.002 (mmu)	1.047	N/A	N/A	Method	True	False	N/A	N/A	N/A			Pass	Pass	N/A	N/A	N/A	Confirmed	N/A
20	Processed	190510-020		Unknown		348									SCN-Bimane IS	T1	Internal Standard	2614	6373	2.24	2.23	-0.01		M+	1	1	1	N/A	111	111	.000 (mmu)	N/A	N/A	N/A	Method	True	False	N/A	N/A	N/A			Pass	Pass	N/A	N/A	N/A	Confirmed	N/A
20	Processed	190510-020		Unknown		348									SCN-Bimane IS	T1C1	Internal Standard	1370	3119	2.23	2.23	0.00		M+	N/A	N/A	N/A	N/A	126.1	126.1	-.002 (mmu)	N/A	N/A	N/A	Method	True	False	N/A	N/A	N/A			Pass	Pass	N/A	N/A	N/A	Confirmed	N/A
21	Processed	190510-021		Unknown		349									SCN-Bimane	T1	Target Compound	3104	7524	2.23	2.23	0.00		M+	21.925	N/A	21.925	N/A	111	111	.000 (mmu)	1.104	1	6812	Method	True	False	N/A	N/A	N/A			Pass	Pass	N/A	N/A	N/A	Confirmed	N/A
21	Processed	190510-021		Unknown		349									SCN-Bimane	T1C1	Target Compound	1523	3707	2.23	2.23	0.00		M+	N/A	N/A	N/A	N/A	124.1	124.1	-.002 (mmu)	1.104	N/A	N/A	Method	True	False	N/A	N/A	N/A			Pass	Pass	N/A	N/A	N/A	Confirmed	N/A
21	Processed	190510-021		Unknown		349									SCN-Bimane IS	T1	Internal Standard	2841	6812	2.24	2.23	-0.01		M+	1	1	1	N/A	111	111	.000 (mmu)	N/A	N/A	N/A	Method	True	False	N/A	N/A	N/A			Pass	Pass	N/A	N/A	N/A	Confirmed	N/A
21	Processed	190510-021		Unknown		349									SCN-Bimane IS	T1C1	Internal Standard	1348	3350	2.23	2.23	0.00		M+	N/A	N/A	N/A	N/A	126.1	126.1	-.002 (mmu)	N/A	N/A	N/A	Method	True	False	N/A	N/A	N/A			Pass	Pass	N/A	N/A	N/A	Confirmed	N/A
22	Processed	190510-022		Unknown		350									SCN-Bimane	T1	Target Compound	3559	8366	2.23	2.23	0.00		M+	25.601	N/A	25.601	N/A	111	111	.000 (mmu)	1.291	1	6478	Method	True	False	N/A	N/A	N/A			Pass	Pass	N/A	N/A	N/A	Confirmed	N/A
22	Processed	190510-022		Unknown		350									SCN-Bimane	T1C1	Target Compound	1856	4274	2.23	2.22	0.01		M+	N/A	N/A	N/A	N/A	124.1	124.1	-.002 (mmu)	1.291	N/A	N/A	Method	True	False	N/A	N/A	N/A			Pass	Pass	N/A	N/A	N/A	Confirmed	N/A
22	Processed	190510-022		Unknown		350									SCN-Bimane IS	T1	Internal Standard	2711	6478	2.24	2.23	-0.01		M+	1	1	1	N/A	111	111	.000 (mmu)	N/A	N/A	N/A	Method	True	False	N/A	N/A	N/A			Pass	Pass	N/A	N/A	N/A	Confirmed	N/A
22	Processed	190510-022		Unknown		350									SCN-Bimane IS	T1C1	Internal Standard	1300	3158	2.23	2.23	-0.01		M+	N/A	N/A	N/A	N/A	126.1	126.1	-.002 (mmu)	N/A	N/A	N/A	Method	True	False	N/A	N/A	N/A			Pass	Pass	N/A	N/A	N/A	Confirmed	N/A
23	Processed	190510-023		Unknown		351									SCN-Bimane	T1	Target Compound	3883	9247	2.23	2.24	0.01		M+	28.226	N/A	28.226	N/A	111	111	.000 (mmu)	1.425	1	6489	Method	True	False	N/A	N/A	N/A			Pass	Pass	N/A	N/A	N/A	Confirmed	N/A
23	Processed	190510-023		Unknown		351									SCN-Bimane	T1C1	Target Compound	1873	4620	2.24	2.23	0.01		M+	N/A	N/A	N/A	N/A	124.1	124.1	-.002 (mmu)	1.425	N/A	N/A	Method	True	False	N/A	N/A	N/A			Pass	Pass	N/A	N/A	N/A	Confirmed	N/A
23	Processed	190510-023		Unknown		351									SCN-Bimane IS	T1	Internal Standard	2753	6489	2.24	2.23	-0.01		M+	1	1	1	N/A	111	111	.000 (mmu)	N/A	N/A	N/A	Method	True	False	N/A	N/A	N/A			Pass	Pass	N/A	N/A	N/A	Confirmed	N/A
23	Processed	190510-023		Unknown		351									SCN-Bimane IS	T1C1	Internal Standard	1460	3337	2.23	2.23	0.00		M+	N/A	N/A	N/A	N/A	126.1	126.1	-.002 (mmu)	N/A	N/A	N/A	Method	True	False	N/A	N/A	N/A			Pass	Pass	N/A	N/A	N/A	Confirmed	N/A
24	Processed	190510-024		Unknown		352									SCN-Bimane	T1	Target Compound	4266	10690	2.23	2.23	0.00		M+	32.495	N/A	32.495	N/A	111	111	.000 (mmu)	1.642	1	6510	Method	True	False	N/A	N/A	N/A			Pass	Pass	N/A	N/A	N/A	Confirmed	N/A
24	Processed	190510-024		Unknown		352									SCN-Bimane	T1C1	Target Compound	1989	5048	2.23	2.23	0.00		M+	N/A	N/A	N/A	N/A	124.1	124.1	-.002 (mmu)	1.642	N/A	N/A	Method	True	False	N/A	N/A	N/A			Pass	Pass	N/A	N/A	N/A	Confirmed	N/A
24	Processed	190510-024		Unknown		352									SCN-Bimane IS	T1	Internal Standard	2680	6510	2.24	2.23	-0.01		M+	1	1	1	N/A	111	111	.000 (mmu)	N/A	N/A	N/A	Method	True	False	N/A	N/A	N/A			Pass	Pass	N/A	N/A	N/A	Confirmed	N/A
24	Processed	190510-024		Unknown		352									SCN-Bimane IS	T1C1	Internal Standard	1464	3304	2.23	2.23	0.00		M+	N/A	N/A	N/A	N/A	126.1	126.1	-.002 (mmu)	N/A	N/A	N/A	Method	True	False	N/A	N/A	N/A			Pass	Pass	N/A	N/A	N/A	Confirmed	N/A
25	Processed	190510-025		Unknown		387									SCN-Bimane	T1	Target Compound	1411	3343	2.23	2.23	0.00		M+	10.18	N/A	10.18	N/A	111	111	.000 (mmu)	0.507	1	6593	Method	True	False	N/A	N/A	N/A			Pass	Pass	N/A	N/A	N/A	Confirmed	N/A
25	Processed	190510-025		Unknown		387									SCN-Bimane	T1C1	Target Compound	685	1487	2.23	2.23	0.00		M+	N/A	N/A	N/A	N/A	124.1	124.1	-.002 (mmu)	0.507	N/A	N/A	Method	True	False	N/A	N/A	N/A			Pass	Pass	N/A	N/A	N/A	Confirmed	N/A
25	Processed	190510-025		Unknown		387									SCN-Bimane IS	T1	Internal Standard	2634	6593	2.24	2.23	-0.01		M+	1	1	1	N/A	111	111	.000 (mmu)	N/A	N/A	N/A	Method	True	False	N/A	N/A	N/A			Pass	Pass	N/A	N/A	N/A	Confirmed	N/A
25	Processed	190510-025		Unknown		387									SCN-Bimane IS	T1C1	Internal Standard	1256	3280	2.23	2.22	0.01		M+	N/A	N/A	N/A	N/A	126.1	126.1	-.002 (mmu)	N/A	N/A	N/A	Method	True	False	N/A	N/A	N/A			Pass	Pass	N/A	N/A	N/A	Confirmed	N/A
26	Processed	190510-026		Unknown		389									SCN-Bimane	T1	Target Compound	2507	5523	2.23	2.23	0.00		M+	15.585	N/A	15.585	N/A	111	111	.000 (mmu)	0.782	1	7063	Method	True	False	N/A	N/A	N/A			Pass	Pass	N/A	N/A	N/A	Confirmed	N/A
26	Processed	190510-026		Unknown		389									SCN-Bimane	T1C1	Target Compound	1107	2715	2.23	2.24	-0.01		M+	N/A	N/A	N/A	N/A	124.1	124.1	-.002 (mmu)	0.782	N/A	N/A	Method	True	False	N/A	N/A	N/A			Pass	Pass	N/A	N/A	N/A	Confirmed	N/A
26	Processed	190510-026		Unknown		389									SCN-Bimane IS	T1	Internal Standard	2924	7063	2.24	2.23	-0.01		M+	1	1	1	N/A	111	111	.000 (mmu)	N/A	N/A	N/A	Method	True	False	N/A	N/A	N/A			Pass	Pass	N/A	N/A	N/A	Confirmed	N/A
26	Processed	190510-026		Unknown		389									SCN-Bimane IS	T1C1	Internal Standard	1381	3583	2.23	2.23	0.00		M+	N/A	N/A	N/A	N/A	126.1	126.1	-.002 (mmu)	N/A	N/A	N/A	Method	True	False	N/A	N/A	N/A			Pass	Pass	N/A	N/A	N/A	Confirmed	N/A
27	Processed	190510-027		Unknown		390									SCN-Bimane	T1	Target Compound	2463	5547	2.23	2.22	-0.01		M+	16.861	N/A	16.861	N/A	111	111	.000 (mmu)	0.847	1	6549	Method	True	False	N/A	N/A	N/A			Pass	Pass	N/A	N/A	N/A	Confirmed	N/A
27	Processed	190510-027		Unknown		390									SCN-Bimane	T1C1	Target Compound	976	2532	2.22	2.24	-0.02		M+	N/A	N/A	N/A	N/A	124.1	124.1	-.002 (mmu)	0.847	N/A	N/A	Method	True	False	N/A	N/A	N/A			Pass	Pass	N/A	N/A	N/A	Confirmed	N/A
27	Processed	190510-027		Unknown		390									SCN-Bimane IS	T1	Internal Standard	2742	6549	2.24	2.23	-0.01		M+	1	1	1	N/A	111	111	.000 (mmu)	N/A	N/A	N/A	Method	True	False	N/A	N/A	N/A			Pass	Pass	N/A	N/A	N/A	Confirmed	N/A
27	Processed	190510-027		Unknown		390									SCN-Bimane IS	T1C1	Internal Standard	1291	3636	2.23	2.22	0.01		M+	N/A	N/A	N/A	N/A	126.1	126.1	-.002 (mmu)	N/A	N/A	N/A	Method	True	False	N/A	N/A	N/A			Pass	Pass	N/A	N/A	N/A	Confirmed	N/A
[truncated: 15 more columns]

## Sheet: Filter
Batch Order	Status	Filename	Group	Sample Type	Level	Sample ID	Sample Name	Comments	ColumnHeader1	ColumnHeader2	ColumnHeader3	ColumnHeader4	ColumnHeader5	ColumnHeader6	Compound	Peak Label	Type	Height	Area	RT	Actual RT	RT Delta	Formula	Adduct	Calculated Amt	Theoretical Amt	Sample Amt	Std Add Amount	m/z (Expected)	m/z (Apex)	m/z (Delta)	Response Ratio	ISTD Amt	ISTD Response	Integration Mode	Active	Excluded	%Diff	%RSD	% CV	Channel	Final Units	PK	IR	IP	LS	FI	Confirm	Isotopic Pattern Score (%)
1	Processed	190510-001		Matrix Blank		Blank									SCN-Bimane	T1	Target Compound	13	9	2.23	2.22	-0.01		M+	21.858	N/A	21.858	N/A	111	111	.000 (mmu)	1.101	1	8	Method	True	False	N/A	N/A	N/A			Pass	Fail	N/A	N/A	N/A	Identified	N/A
1	Processed	190510-001		Matrix Blank		Blank									SCN-Bimane	T1C1	Target Compound	22	20	2.22	2.25	-0.03		M+	N/A	N/A	N/A	N/A	124.1	124.1	-.002 (mmu)	1.101	N/A	N/A	Method	True	False	N/A	N/A	N/A			Pass	Fail	N/A	N/A	N/A	Identified	N/A
1	Processed	190510-001		Matrix Blank		Blank									SCN-Bimane IS	T1	Internal Standard	14	8	2.24	2.28	0.04		M+	1	1	1	N/A	111	111	.000 (mmu)	N/A	N/A	N/A	Method	True	False	N/A	N/A	N/A			Pass	Fail	N/A	N/A	N/A	Identified	N/A
1	Processed	190510-001		Matrix Blank		Blank									SCN-Bimane IS	T1C1	Internal Standard	42	80	2.28	2.29	-0.01		M+	N/A	N/A	N/A	N/A	126.1	126.1	-.002 (mmu)	N/A	N/A	N/A	Method	True	False	N/A	N/A	N/A			Pass	Fail	N/A	N/A	N/A	Identified	N/A
2	Processed	190510-002		Cal Std	1	5 ppb SCN									SCN-Bimane	T1	Target Compound	738	1675	2.23	2.23	0.00		M+	5.322	5	5.322	N/A	111	111	.000 (mmu)	0.26	1	6441	Method	True	False	6.44	N/A	N/A			Pass	Pass	N/A	N/A	N/A	Confirmed	N/A
2	Processed	190510-002		Cal Std	1	5 ppb SCN									SCN-Bimane	T1C1	Target Compound	363	813	2.23	2.23	0.00		M+	N/A	N/A	N/A	N/A	124.1	124.1	-.002 (mmu)	0.26	N/A	N/A	Method	True	False	N/A	N/A	N/A			Pass	Pass	N/A	N/A	N/A	Confirmed	N/A
2	Processed	190510-002		Cal Std	1	5 ppb SCN									SCN-Bimane IS	T1	Internal Standard	2715	6441	2.24	2.23	-0.01		M+	1	1	1	N/A	111	111	.000 (mmu)	N/A	N/A	N/A	Method	True	False	0	N/A	N/A			Pass	Pass	N/A	N/A	N/A	Confirmed	N/A
2	Processed	190510-002		Cal Std	1	5 ppb SCN									SCN-Bimane IS	T1C1	Internal Standard	1188	3107	2.23	2.24	0.00		M+	N/A	N/A	N/A	N/A	126.1	126.1	-.002 (mmu)	N/A	N/A	N/A	Method	True	False	N/A	N/A	N/A			Pass	Pass	N/A	N/A	N/A	Confirmed	N/A
3	Processed	190510-003		Cal Std	2	10 ppb SCN									SCN-Bimane	T1	Target Compound	1275	2964	2.23	2.23	0.00		M+	9.56	10	9.56	N/A	111	111	.000 (mmu)	0.476	1	6232	Method	True	False	-4.4	N/A	N/A			Pass	Pass	N/A	N/A	N/A	Confirmed	N/A
3	Processed	190510-003		Cal Std	2	10 ppb SCN									SCN-Bimane	T1C1	Target Compound	698	1427	2.23	2.24	0.00		M+	N/A	N/A	N/A	N/A	124.1	124.1	-.002 (mmu)	0.476	N/A	N/A	Method	True	False	N/A	N/A	N/A			Pass	Pass	N/A	N/A	N/A	Confirmed	N/A
3	Processed	190510-003		Cal Std	2	10 ppb SCN									SCN-Bimane IS	T1	Internal Standard	2594	6232	2.24	2.23	-0.01		M+	1	1	1	N/A	111	111	.000 (mmu)	N/A	N/A	N/A	Method	True	False	0	N/A	N/A			Pass	Pass	N/A	N/A	N/A	Confirmed	N/A
3	Processed	190510-003		Cal Std	2	10 ppb SCN									SCN-Bimane IS	T1C1	Internal Standard	1202	3007	2.23	2.23	0.01		M+	N/A	N/A	N/A	N/A	126.1	126.1	-.002 (mmu)	N/A	N/A	N/A	Method	True	False	N/A	N/A	N/A			Pass	Pass	N/A	N/A	N/A	Confirmed	N/A
4	Processed	190510-004		Cal Std	3	25 ppb SCN									SCN-Bimane	T1	Target Compound	3178	7808	2.23	2.24	0.01		M+	25.607	25	25.607	N/A	111	111	.000 (mmu)	1.292	1	6044	Method	True	False	2.43	N/A	N/A			Pass	Pass	N/A	N/A	N/A	Confirmed	N/A
4	Processed	190510-004		Cal Std	3	25 ppb SCN									SCN-Bimane	T1C1	Target Compound	1578	3655	2.24	2.23	0.01		M+	N/A	N/A	N/A	N/A	124.1	124.1	-.002 (mmu)	1.292	N/A	N/A	Method	True	False	N/A	N/A	N/A			Pass	Pass	N/A	N/A	N/A	Confirmed	N/A
4	Processed	190510-004		Cal Std	3	25 ppb SCN									SCN-Bimane IS	T1	Internal Standard	2467	6044	2.24	2.23	-0.01		M+	1	1	1	N/A	111	111	.000 (mmu)	N/A	N/A	N/A	Method	True	False	0	N/A	N/A			Pass	Pass	N/A	N/A	N/A	Confirmed	N/A
4	Processed	190510-004		Cal Std	3	25 ppb SCN									SCN-Bimane IS	T1C1	Internal Standard	1274	3132	2.23	2.23	0.00		M+	N/A	N/A	N/A	N/A	126.1	126.1	-.002 (mmu)	N/A	N/A	N/A	Method	True	False	N/A	N/A	N/A			Pass	Pass	N/A	N/A	N/A	Confirmed	N/A
5	Processed	190510-005		Cal Std	4	50 ppb SCN									SCN-Bimane	T1	Target Compound	6184	15064	2.23	2.23	0.00		M+	44.285	50	44.285	N/A	111	111	.000 (mmu)	2.242	1	6720	Method	True	False	-11.43	N/A	N/A			Pass	Pass	N/A	N/A	N/A	Confirmed	N/A
5	Processed	190510-005		Cal Std	4	50 ppb SCN									SCN-Bimane	T1C1	Target Compound	2842	7061	2.23	2.23	0.00		M+	N/A	N/A	N/A	N/A	124.1	124.1	-.002 (mmu)	2.242	N/A	N/A	Method	True	False	N/A	N/A	N/A			Pass	Pass	N/A	N/A	N/A	Confirmed	N/A
5	Processed	190510-005		Cal Std	4	50 ppb SCN									SCN-Bimane IS	T1	Internal Standard	2781	6720	2.24	2.24	0.00		M+	1	1	1	N/A	111	111	.000 (mmu)	N/A	N/A	N/A	Method	True	False	0	N/A	N/A			Pass	Pass	N/A	N/A	N/A	Confirmed	N/A
5	Processed	190510-005		Cal Std	4	50 ppb SCN									SCN-Bimane IS	T1C1	Internal Standard	1375	3339	2.24	2.23	0.00		M+	N/A	N/A	N/A	N/A	126.1	126.1	-.002 (mmu)	N/A	N/A	N/A	Method	True	False	N/A	N/A	N/A			Pass	Pass	N/A	N/A	N/A	Confirmed	N/A
6	Processed	190510-006		Cal Std	5	100 ppb SCN									SCN-Bimane	T1	Target Compound	13007	31662	2.23	2.23	0.00		M+	80.227	75	80.227	N/A	111	111	.000 (mmu)	4.07	1	7779	Method	True	False	6.97	N/A	N/A			Pass	Pass	N/A	N/A	N/A	Confirmed	N/A
6	Processed	190510-006		Cal Std	5	100 ppb SCN									SCN-Bimane	T1C1	Target Compound	6019	14610	2.23	2.23	0.00		M+	N/A	N/A	N/A	N/A	124.1	124.1	-.002 (mmu)	4.07	N/A	N/A	Method	True	False	N/A	N/A	N/A			Pass	Pass	N/A	N/A	N/A	Confirmed	N/A
6	Processed	190510-006		Cal Std	5	100 ppb SCN									SCN-Bimane IS	T1	Internal Standard	3059	7779	2.24	2.24	0.00		M+	1	1	1	N/A	111	111	.000 (mmu)	N/A	N/A	N/A	Method	True	False	0	N/A	N/A			Pass	Pass	N/A	N/A	N/A	Confirmed	N/A
6	Processed	190510-006		Cal Std	5	100 ppb SCN									SCN-Bimane IS	T1C1	Internal Standard	1381	3620	2.24	2.23	0.01		M+	N/A	N/A	N/A	N/A	126.1	126.1	-.002 (mmu)	N/A	N/A	N/A	Method	True	False	N/A	N/A	N/A			Pass	Pass	N/A	N/A	N/A	Confirmed	N/A
7	Processed	190510-007		Unknown		335									SCN-Bimane	T1	Target Compound	16556	39365	2.23	2.23	0.00		M+	98.619	N/A	98.619	N/A	111	111	.000 (mmu)	5.005	1	7865	Method	True	False	N/A	N/A	N/A			Pass	Pass	N/A	N/A	N/A	Confirmed	N/A
7	Processed	190510-007		Unknown		335									SCN-Bimane	T1C1	Target Compound	7917	18842	2.23	2.23	0.00		M+	N/A	N/A	N/A	N/A	124.1	124.1	-.002 (mmu)	5.005	N/A	N/A	Method	True	False	N/A	N/A	N/A			Pass	Pass	N/A	N/A	N/A	Confirmed	N/A
7	Processed	190510-007		Unknown		335									SCN-Bimane IS	T1	Internal Standard	3443	7865	2.24	2.23	-0.01		M+	1	1	1	N/A	111	111	.000 (mmu)	N/A	N/A	N/A	Method	True	False	N/A	N/A	N/A			Pass	Pass	N/A	N/A	N/A	Confirmed	N/A
7	Processed	190510-007		Unknown		335									SCN-Bimane IS	T1C1	Internal Standard	1488	3775	2.23	2.23	0.00		M+	N/A	N/A	N/A	N/A	126.1	126.1	-.002 (mmu)	N/A	N/A	N/A	Method	True	False	N/A	N/A	N/A			Pass	Pass	N/A	N/A	N/A	Confirmed	N/A
8	Processed	190510-008		Unknown		336									SCN-Bimane	T1	Target Compound	13973	33564	2.23	2.23	0.00		M+	88.201	N/A	88.201	N/A	111	111	.000 (mmu)	4.476	1	7499	Method	True	False	N/A	N/A	N/A			Pass	Pass	N/A	N/A	N/A	Confirmed	N/A
8	Processed	190510-008		Unknown		336									SCN-Bimane	T1C1	Target Compound	6578	15565	2.23	2.23	0.00		M+	N/A	N/A	N/A	N/A	124.1	124.1	-.002 (mmu)	4.476	N/A	N/A	Method	True	False	N/A	N/A	N/A			Pass	Pass	N/A	N/A	N/A	Confirmed	N/A
8	Processed	190510-008		Unknown		336									SCN-Bimane IS	T1	Internal Standard	2994	7499	2.24	2.23	-0.01		M+	1	1	1	N/A	111	111	.000 (mmu)	N/A	N/A	N/A	Method	True	False	N/A	N/A	N/A			Pass	Pass	N/A	N/A	N/A	Confirmed	N/A
8	Processed	190510-008		Unknown		336									SCN-Bimane IS	T1C1	Internal Standard	1585	3829	2.23	2.23	0.00		M+	N/A	N/A	N/A	N/A	126.1	126.1	-.002 (mmu)	N/A	N/A	N/A	Method	True	False	N/A	N/A	N/A			Pass	Pass	N/A	N/A	N/A	Confirmed	N/A
9	Processed	190510-009		Unknown		337									SCN-Bimane	T1	Target Compound	13193	31317	2.23	2.23	0.00		M+	77.29	N/A	77.29	N/A	111	111	.000 (mmu)	3.921	1	7988	Method	True	False	N/A	N/A	N/A			Pass	Pass	N/A	N/A	N/A	Confirmed	N/A
9	Processed	190510-009		Unknown		337									SCN-Bimane	T1C1	Target Compound	5871	14562	2.23	2.23	0.00		M+	N/A	N/A	N/A	N/A	124.1	124.1	-.002 (mmu)	3.921	N/A	N/A	Method	True	False	N/A	N/A	N/A			Pass	Pass	N/A	N/A	N/A	Confirmed	N/A
9	Processed	190510-009		Unknown		337									SCN-Bimane IS	T1	Internal Standard	3257	7988	2.24	2.24	0.00		M+	1	1	1	N/A	111	111	.000 (mmu)	N/A	N/A	N/A	Method	True	False	N/A	N/A	N/A			Pass	Pass	N/A	N/A	N/A	Confirmed	N/A
9	Processed	190510-009		Unknown		337									SCN-Bimane IS	T1C1	Internal Standard	1499	3771	2.24	2.23	0.00		M+	N/A	N/A	N/A	N/A	126.1	126.1	-.002 (mmu)	N/A	N/A	N/A	Method	True	False	N/A	N/A	N/A			Pass	Pass	N/A	N/A	N/A	Confirmed	N/A
10	Processed	190510-010		Unknown		338									SCN-Bimane	T1	Target Compound	12154	29577	2.23	2.23	0.00		M+	82.312	N/A	82.312	N/A	111	111	.000 (mmu)	4.176	1	7083	Method	True	False	N/A	N/A	N/A			Pass	Pass	N/A	N/A	N/A	Confirmed	N/A
10	Processed	190510-010		Unknown		338									SCN-Bimane	T1C1	Target Compound	5592	14052	2.23	2.23	0.00		M+	N/A	N/A	N/A	N/A	124.1	124.1	-.002 (mmu)	4.176	N/A	N/A	Method	True	False	N/A	N/A	N/A			Pass	Pass	N/A	N/A	N/A	Confirmed	N/A
10	Processed	190510-010		Unknown		338									SCN-Bimane IS	T1	Internal Standard	2857	7083	2.24	2.23	-0.01		M+	1	1	1	N/A	111	111	.000 (mmu)	N/A	N/A	N/A	Method	True	False	N/A	N/A	N/A			Pass	Pass	N/A	N/A	N/A	Confirmed	N/A
10	Processed	190510-010		Unknown		338									SCN-Bimane IS	T1C1	Internal Standard	1496	3835	2.23	2.23	0.01		M+	N/A	N/A	N/A	N/A	126.1	126.1	-.002 (mmu)	N/A	N/A	N/A	Method	True	False	N/A	N/A	N/A			Pass	Pass	N/A	N/A	N/A	Confirmed	N/A
11	Processed	190510-011		Unknown		339									SCN-Bimane	T1	Target Compound	10133	25783	2.23	2.22	-0.01		M+	68.941	N/A	68.941	N/A	111	111	.000 (mmu)	3.496	1	7375	Method	True	False	N/A	N/A	N/A			Pass	Pass	N/A	N/A	N/A	Confirmed	N/A
11	Processed	190510-011		Unknown		339									SCN-Bimane	T1C1	Target Compound	5015	12075	2.22	2.23	-0.01		M+	N/A	N/A	N/A	N/A	124.1	124.1	-.002 (mmu)	3.496	N/A	N/A	Method	True	False	N/A	N/A	N/A			Pass	Pass	N/A	N/A	N/A	Confirmed	N/A
11	Processed	190510-011		Unknown		339									SCN-Bimane IS	T1	Internal Standard	2937	7375	2.24	2.23	-0.01		M+	1	1	1	N/A	111	111	.000 (mmu)	N/A	N/A	N/A	Method	True	False	N/A	N/A	N/A			Pass	Pass	N/A	N/A	N/A	Confirmed	N/A
11	Processed	190510-011		Unknown		339									SCN-Bimane IS	T1C1	Internal Standard	1408	3628	2.23	2.23	0.01		M+	N/A	N/A	N/A	N/A	126.1	126.1	-.002 (mmu)	N/A	N/A	N/A	Method	True	False	N/A	N/A	N/A			Pass	Pass	N/A	N/A	N/A	Confirmed	N/A
12	Processed	190510-012		Unknown		340									SCN-Bimane	T1	Target Compound	9556	22073	2.23	2.23	0.00		M+	60.02	N/A	60.02	N/A	111	111	.000 (mmu)	3.042	1	7256	Method	True	False	N/A	N/A	N/A			Pass	Pass	N/A	N/A	N/A	Confirmed	N/A
12	Processed	190510-012		Unknown		340									SCN-Bimane	T1C1	Target Compound	4665	10310	2.23	2.23	0.00		M+	N/A	N/A	N/A	N/A	124.1	124.1	-.002 (mmu)	3.042	N/A	N/A	Method	True	False	N/A	N/A	N/A			Pass	Pass	N/A	N/A	N/A	Confirmed	N/A
12	Processed	190510-012		Unknown		340									SCN-Bimane IS	T1	Internal Standard	2859	7256	2.24	2.23	-0.01		M+	1	1	1	N/A	111	111	.000 (mmu)	N/A	N/A	N/A	Method	True	False	N/A	N/A	N/A			Pass	Pass	N/A	N/A	N/A	Confirmed	N/A
12	Processed	190510-012		Unknown		340									SCN-Bimane IS	T1C1	Internal Standard	1329	3303	2.23	2.23	0.00		M+	N/A	N/A	N/A	N/A	126.1	126.1	-.002 (mmu)	N/A	N/A	N/A	Method	True	False	N/A	N/A	N/A			Pass	Pass	N/A	N/A	N/A	Confirmed	N/A
13	Processed	190510-013		Unknown		341									SCN-Bimane	T1	Target Compound	16318	40338	2.23	2.23	0.00		M+	97.301	N/A	97.301	N/A	111	111	.000 (mmu)	4.938	1	8168	Method	True	False	N/A	N/A	N/A			Pass	Pass	N/A	N/A	N/A	Confirmed	N/A
13	Processed	190510-013		Unknown		341									SCN-Bimane	T1C1	Target Compound	7520	18695	2.23	2.23	0.00		M+	N/A	N/A	N/A	N/A	124.1	124.1	-.002 (mmu)	4.938	N/A	N/A	Method	True	False	N/A	N/A	N/A			Pass	Pass	N/A	N/A	N/A	Confirmed	N/A
13	Processed	190510-013		Unknown		341									SCN-Bimane IS	T1	Internal Standard	3549	8168	2.24	2.23	-0.01		M+	1	1	1	N/A	111	111	.000 (mmu)	N/A	N/A	N/A	Method	True	False	N/A	N/A	N/A			Pass	Pass	N/A	N/A	N/A	Confirmed	N/A
13	Processed	190510-013		Unknown		341									SCN-Bimane IS	T1C1	Internal Standard	1574	4205	2.23	2.23	0.01		M+	N/A	N/A	N/A	N/A	126.1	126.1	-.002 (mmu)	N/A	N/A	N/A	Method	True	False	N/A	N/A	N/A			Pass	Pass	N/A	N/A	N/A	Confirmed	N/A
14	Processed	190510-014		Unknown		342									SCN-Bimane	T1	Target Compound	18262	42991	2.23	2.23	0.00		M+	104.973	N/A	104.973	N/A	111	111	.000 (mmu)	5.329	1	8068	Method	True	False	N/A	N/A	N/A			Pass	Pass	N/A	N/A	N/A	Confirmed	N/A
14	Processed	190510-014		Unknown		342									SCN-Bimane	T1C1	Target Compound	7831	19967	2.23	2.23	0.00		M+	N/A	N/A	N/A	N/A	124.1	124.1	-.002 (mmu)	5.329	N/A	N/A	Method	True	False	N/A	N/A	N/A			Pass	Pass	N/A	N/A	N/A	Confirmed	N/A
14	Processed	190510-014		Unknown		342									SCN-Bimane IS	T1	Internal Standard	3240	8068	2.24	2.23	-0.01		M+	1	1	1	N/A	111	111	.000 (mmu)	N/A	N/A	N/A	Method	True	False	N/A	N/A	N/A			Pass	Pass	N/A	N/A	N/A	Confirmed	N/A
14	Processed	190510-014		Unknown		342									SCN-Bimane IS	T1C1	Internal Standard	1735	4093	2.23	2.24	0.00		M+	N/A	N/A	N/A	N/A	126.1	126.1	-.002 (mmu)	N/A	N/A	N/A	Method	True	False	N/A	N/A	N/A			Pass	Pass	N/A	N/A	N/A	Confirmed	N/A
15	Processed	190510-015		Unknown		343									SCN-Bimane	T1	Target Compound	12724	30533	2.23	2.23	0.00		M+	78.356	N/A	78.356	N/A	111	111	.000 (mmu)	3.975	1	7682	Method	True	False	N/A	N/A	N/A			Pass	Pass	N/A	N/A	N/A	Confirmed	N/A
15	Processed	190510-015		Unknown		343									SCN-Bimane	T1C1	Target Compound	5911	14160	2.23	2.23	0.00		M+	N/A	N/A	N/A	N/A	124.1	124.1	-.002 (mmu)	3.975	N/A	N/A	Method	True	False	N/A	N/A	N/A			Pass	Pass	N/A	N/A	N/A	Confirmed	N/A
15	Processed	190510-015		Unknown		343									SCN-Bimane IS	T1	Internal Standard	3114	7682	2.24	2.23	-0.01		M+	1	1	1	N/A	111	111	.000 (mmu)	N/A	N/A	N/A	Method	True	False	N/A	N/A	N/A			Pass	Pass	N/A	N/A	N/A	Confirmed	N/A
15	Processed	190510-015		Unknown		343									SCN-Bimane IS	T1C1	Internal Standard	1598	3807	2.23	2.23	0.00		M+	N/A	N/A	N/A	N/A	126.1	126.1	-.002 (mmu)	N/A	N/A	N/A	Method	True	False	N/A	N/A	N/A			Pass	Pass	N/A	N/A	N/A	Confirmed	N/A
16	Processed	190510-016		Unknown		344									SCN-Bimane	T1	Target Compound	6114	14706	2.23	2.23	0.00		M+	43.111	N/A	43.111	N/A	111	111	.000 (mmu)	2.182	1	6739	Method	True	False	N/A	N/A	N/A			Pass	Pass	N/A	N/A	N/A	Confirmed	N/A
16	Processed	190510-016		Unknown		344									SCN-Bimane	T1C1	Target Compound	2968	7057	2.23	2.23	0.00		M+	N/A	N/A	N/A	N/A	124.1	124.1	-.002 (mmu)	2.182	N/A	N/A	Method	True	False	N/A	N/A	N/A			Pass	Pass	N/A	N/A	N/A	Confirmed	N/A
16	Processed	190510-016		Unknown		344									SCN-Bimane IS	T1	Internal Standard	2772	6739	2.24	2.23	-0.01		M+	1	1	1	N/A	111	111	.000 (mmu)	N/A	N/A	N/A	Method	True	False	N/A	N/A	N/A			Pass	Pass	N/A	N/A	N/A	Confirmed	N/A
16	Processed	190510-016		Unknown		344									SCN-Bimane IS	T1C1	Internal Standard	1424	3436	2.23	2.23	0.00		M+	N/A	N/A	N/A	N/A	126.1	126.1	-.002 (mmu)	N/A	N/A	N/A	Method	True	False	N/A	N/A	N/A			Pass	Pass	N/A	N/A	N/A	Confirmed	N/A
17	Processed	190510-017		Unknown		345									SCN-Bimane	T1	Target Compound	6536	16559	2.23	2.23	0.00		M+	45.991	N/A	45.991	N/A	111	111	.000 (mmu)	2.329	1	7111	Method	True	False	N/A	N/A	N/A			Pass	Pass	N/A	N/A	N/A	Confirmed	N/A
17	Processed	190510-017		Unknown		345									SCN-Bimane	T1C1	Target Compound	3137	7925	2.23	2.23	0.01		M+	N/A	N/A	N/A	N/A	124.1	124.1	-.002 (mmu)	2.329	N/A	N/A	Method	True	False	N/A	N/A	N/A			Pass	Pass	N/A	N/A	N/A	Confirmed	N/A
17	Processed	190510-017		Unknown		345									SCN-Bimane IS	T1	Internal Standard	3083	7111	2.24	2.23	-0.01		M+	1	1	1	N/A	111	111	.000 (mmu)	N/A	N/A	N/A	Method	True	False	N/A	N/A	N/A			Pass	Pass	N/A	N/A	N/A	Confirmed	N/A
17	Processed	190510-017		Unknown		345									SCN-Bimane IS	T1C1	Internal Standard	1321	3491	2.23	2.22	0.01		M+	N/A	N/A	N/A	N/A	126.1	126.1	-.002 (mmu)	N/A	N/A	N/A	Method	True	False	N/A	N/A	N/A			Pass	Pass	N/A	N/A	N/A	Confirmed	N/A
18	Processed	190510-018		Unknown		346									SCN-Bimane	T1	Target Compound	18554	45077	2.23	2.23	0.00		M+	109.84	N/A	109.84	N/A	111	111	.000 (mmu)	5.576	1	8084	Method	True	False	N/A	N/A	N/A			Pass	Pass	N/A	N/A	N/A	Confirmed	N/A
18	Processed	190510-018		Unknown		346									SCN-Bimane	T1C1	Target Compound	8191	20275	2.23	2.23	0.00		M+	N/A	N/A	N/A	N/A	124.1	124.1	-.002 (mmu)	5.576	N/A	N/A	Method	True	False	N/A	N/A	N/A			Pass	Pass	N/A	N/A	N/A	Confirmed	N/A
18	Processed	190510-018		Unknown		346									SCN-Bimane IS	T1	Internal Standard	3353	8084	2.24	2.23	-0.01		M+	1	1	1	N/A	111	111	.000 (mmu)	N/A	N/A	N/A	Method	True	False	N/A	N/A	N/A			Pass	Pass	N/A	N/A	N/A	Confirmed	N/A
18	Processed	190510-018		Unknown		346									SCN-Bimane IS	T1C1	Internal Standard	1508	3892	2.23	2.23	0.00		M+	N/A	N/A	N/A	N/A	126.1	126.1	-.002 (mmu)	N/A	N/A	N/A	Method	True	False	N/A	N/A	N/A			Pass	Pass	N/A	N/A	N/A	Confirmed	N/A
19	Processed	190510-019		Unknown		347									SCN-Bimane	T1	Target Compound	2160	5341	2.23	2.24	0.01		M+	16.075	N/A	16.075	N/A	111	111	.000 (mmu)	0.807	1	6619	Method	True	False	N/A	N/A	N/A			Pass	Pass	N/A	N/A	N/A	Confirmed	N/A
19	Processed	190510-019		Unknown		347									SCN-Bimane	T1C1	Target Compound	1067	2658	2.24	2.23	0.01		M+	N/A	N/A	N/A	N/A	124.1	124.1	-.002 (mmu)	0.807	N/A	N/A	Method	True	False	N/A	N/A	N/A			Pass	Pass	N/A	N/A	N/A	Confirmed	N/A
19	Processed	190510-019		Unknown		347									SCN-Bimane IS	T1	Internal Standard	2890	6619	2.24	2.23	-0.01		M+	1	1	1	N/A	111	111	.000 (mmu)	N/A	N/A	N/A	Method	True	False	N/A	N/A	N/A			Pass	Pass	N/A	N/A	N/A	Confirmed	N/A
19	Processed	190510-019		Unknown		347									SCN-Bimane IS	T1C1	Internal Standard	1354	3315	2.23	2.23	0.00		M+	N/A	N/A	N/A	N/A	126.1	126.1	-.002 (mmu)	N/A	N/A	N/A	Method	True	False	N/A	N/A	N/A			Pass	Pass	N/A	N/A	N/A	Confirmed	N/A
20	Processed	190510-020		Unknown		348									SCN-Bimane	T1	Target Compound	2747	6672	2.23	2.23	0.00		M+	20.794	N/A	20.794	N/A	111	111	.000 (mmu)	1.047	1	6373	Method	True	False	N/A	N/A	N/A			Pass	Pass	N/A	N/A	N/A	Confirmed	N/A
20	Processed	190510-020		Unknown		348									SCN-Bimane	T1C1	Target Compound	1261	3184	2.23	2.23	-0.01		M+	N/A	N/A	N/A	N/A	124.1	124.1	-.002 (mmu)	1.047	N/A	N/A	Method	True	False	N/A	N/A	N/A			Pass	Pass	N/A	N/A	N/A	Confirmed	N/A
20	Processed	190510-020		Unknown		348									SCN-Bimane IS	T1	Internal Standard	2614	6373	2.24	2.23	-0.01		M+	1	1	1	N/A	111	111	.000 (mmu)	N/A	N/A	N/A	Method	True	False	N/A	N/A	N/A			Pass	Pass	N/A	N/A	N/A	Confirmed	N/A
20	Processed	190510-020		Unknown		348									SCN-Bimane IS	T1C1	Internal Standard	1370	3119	2.23	2.23	0.00		M+	N/A	N/A	N/A	N/A	126.1	126.1	-.002 (mmu)	N/A	N/A	N/A	Method	True	False	N/A	N/A	N/A			Pass	Pass	N/A	N/A	N/A	Confirmed	N/A
21	Processed	190510-021		Unknown		349									SCN-Bimane	T1	Target Compound	3104	7524	2.23	2.23	0.00		M+	21.925	N/A	21.925	N/A	111	111	.000 (mmu)	1.104	1	6812	Method	True	False	N/A	N/A	N/A			Pass	Pass	N/A	N/A	N/A	Confirmed	N/A
21	Processed	190510-021		Unknown		349									SCN-Bimane	T1C1	Target Compound	1523	3707	2.23	2.23	0.00		M+	N/A	N/A	N/A	N/A	124.1	124.1	-.002 (mmu)	1.104	N/A	N/A	Method	True	False	N/A	N/A	N/A			Pass	Pass	N/A	N/A	N/A	Confirmed	N/A
21	Processed	190510-021		Unknown		349									SCN-Bimane IS	T1	Internal Standard	2841	6812	2.24	2.23	-0.01		M+	1	1	1	N/A	111	111	.000 (mmu)	N/A	N/A	N/A	Method	True	False	N/A	N/A	N/A			Pass	Pass	N/A	N/A	N/A	Confirmed	N/A
21	Processed	190510-021		Unknown		349									SCN-Bimane IS	T1C1	Internal Standard	1348	3350	2.23	2.23	0.00		M+	N/A	N/A	N/A	N/A	126.1	126.1	-.002 (mmu)	N/A	N/A	N/A	Method	True	False	N/A	N/A	N/A			Pass	Pass	N/A	N/A	N/A	Confirmed	N/A
22	Processed	190510-022		Unknown		350									SCN-Bimane	T1	Target Compound	3559	8366	2.23	2.23	0.00		M+	25.601	N/A	25.601	N/A	111	111	.000 (mmu)	1.291	1	6478	Method	True	False	N/A	N/A	N/A			Pass	Pass	N/A	N/A	N/A	Confirmed	N/A
22	Processed	190510-022		Unknown		350									SCN-Bimane	T1C1	Target Compound	1856	4274	2.23	2.22	0.01		M+	N/A	N/A	N/A	N/A	124.1	124.1	-.002 (mmu)	1.291	N/A	N/A	Method	True	False	N/A	N/A	N/A			Pass	Pass	N/A	N/A	N/A	Confirmed	N/A
22	Processed	190510-022		Unknown		350									SCN-Bimane IS	T1	Internal Standard	2711	6478	2.24	2.23	-0.01		M+	1	1	1	N/A	111	111	.000 (mmu)	N/A	N/A	N/A	Method	True	False	N/A	N/A	N/A			Pass	Pass	N/A	N/A	N/A	Confirmed	N/A
22	Processed	190510-022		Unknown		350									SCN-Bimane IS	T1C1	Internal Standard	1300	3158	2.23	2.23	-0.01		M+	N/A	N/A	N/A	N/A	126.1	126.1	-.002 (mmu)	N/A	N/A	N/A	Method	True	False	N/A	N/A	N/A			Pass	Pass	N/A	N/A	N/A	Confirmed	N/A
23	Processed	190510-023		Unknown		351									SCN-Bimane	T1	Target Compound	3883	9247	2.23	2.24	0.01		M+	28.226	N/A	28.226	N/A	111	111	.000 (mmu)	1.425	1	6489	Method	True	False	N/A	N/A	N/A			Pass	Pass	N/A	N/A	N/A	Confirmed	N/A
23	Processed	190510-023		Unknown		351									SCN-Bimane	T1C1	Target Compound	1873	4620	2.24	2.23	0.01		M+	N/A	N/A	N/A	N/A	124.1	124.1	-.002 (mmu)	1.425	N/A	N/A	Method	True	False	N/A	N/A	N/A			Pass	Pass	N/A	N/A	N/A	Confirmed	N/A
23	Processed	190510-023		Unknown		351									SCN-Bimane IS	T1	Internal Standard	2753	6489	2.24	2.23	-0.01		M+	1	1	1	N/A	111	111	.000 (mmu)	N/A	N/A	N/A	Method	True	False	N/A	N/A	N/A			Pass	Pass	N/A	N/A	N/A	Confirmed	N/A
23	Processed	190510-023		Unknown		351									SCN-Bimane IS	T1C1	Internal Standard	1460	3337	2.23	2.23	0.00		M+	N/A	N/A	N/A	N/A	126.1	126.1	-.002 (mmu)	N/A	N/A	N/A	Method	True	False	N/A	N/A	N/A			Pass	Pass	N/A	N/A	N/A	Confirmed	N/A
24	Processed	190510-024		Unknown		352									SCN-Bimane	T1	Target Compound	4266	10690	2.23	2.23	0.00		M+	32.495	N/A	32.495	N/A	111	111	.000 (mmu)	1.642	1	6510	Method	True	False	N/A	N/A	N/A			Pass	Pass	N/A	N/A	N/A	Confirmed	N/A
24	Processed	190510-024		Unknown		352									SCN-Bimane	T1C1	Target Compound	1989	5048	2.23	2.23	0.00		M+	N/A	N/A	N/A	N/A	124.1	124.1	-.002 (mmu)	1.642	N/A	N/A	Method	True	False	N/A	N/A	N/A			Pass	Pass	N/A	N/A	N/A	Confirmed	N/A
24	Processed	190510-024		Unknown		352									SCN-Bimane IS	T1	Internal Standard	2680	6510	2.24	2.23	-0.01		M+	1	1	1	N/A	111	111	.000 (mmu)	N/A	N/A	N/A	Method	True	False	N/A	N/A	N/A			Pass	Pass	N/A	N/A	N/A	Confirmed	N/A
24	Processed	190510-024		Unknown		352									SCN-Bimane IS	T1C1	Internal Standard	1464	3304	2.23	2.23	0.00		M+	N/A	N/A	N/A	N/A	126.1	126.1	-.002 (mmu)	N/A	N/A	N/A	Method	True	False	N/A	N/A	N/A			Pass	Pass	N/A	N/A	N/A	Confirmed	N/A
25	Processed	190510-025		Unknown		387									SCN-Bimane	T1	Target Compound	1411	3343	2.23	2.23	0.00		M+	10.18	N/A	10.18	N/A	111	111	.000 (mmu)	0.507	1	6593	Method	True	False	N/A	N/A	N/A			Pass	Pass	N/A	N/A	N/A	Confirmed	N/A
25	Processed	190510-025		Unknown		387									SCN-Bimane	T1C1	Target Compound	685	1487	2.23	2.23	0.00		M+	N/A	N/A	N/A	N/A	124.1	124.1	-.002 (mmu)	0.507	N/A	N/A	Method	True	False	N/A	N/A	N/A			Pass	Pass	N/A	N/A	N/A	Confirmed	N/A
25	Processed	190510-025		Unknown		387									SCN-Bimane IS	T1	Internal Standard	2634	6593	2.24	2.23	-0.01		M+	1	1	1	N/A	111	111	.000 (mmu)	N/A	N/A	N/A	Method	True	False	N/A	N/A	N/A			Pass	Pass	N/A	N/A	N/A	Confirmed	N/A
25	Processed	190510-025		Unknown		387									SCN-Bimane IS	T1C1	Internal Standard	1256	3280	2.23	2.22	0.01		M+	N/A	N/A	N/A	N/A	126.1	126.1	-.002 (mmu)	N/A	N/A	N/A	Method	True	False	N/A	N/A	N/A			Pass	Pass	N/A	N/A	N/A	Confirmed	N/A
26	Processed	190510-026		Unknown		389									SCN-Bimane	T1	Target Compound	2507	5523	2.23	2.23	0.00		M+	15.585	N/A	15.585	N/A	111	111	.000 (mmu)	0.782	1	7063	Method	True	False	N/A	N/A	N/A			Pass	Pass	N/A	N/A	N/A	Confirmed	N/A
26	Processed	190510-026		Unknown		389									SCN-Bimane	T1C1	Target Compound	1107	2715	2.23	2.24	-0.01		M+	N/A	N/A	N/A	N/A	124.1	124.1	-.002 (mmu)	0.782	N/A	N/A	Method	True	False	N/A	N/A	N/A			Pass	Pass	N/A	N/A	N/A	Confirmed	N/A
26	Processed	190510-026		Unknown		389									SCN-Bimane IS	T1	Internal Standard	2924	7063	2.24	2.23	-0.01		M+	1	1	1	N/A	111	111	.000 (mmu)	N/A	N/A	N/A	Method	True	False	N/A	N/A	N/A			Pass	Pass	N/A	N/A	N/A	Confirmed	N/A
26	Processed	190510-026		Unknown		389									SCN-Bimane IS	T1C1	Internal Standard	1381	3583	2.23	2.23	0.00		M+	N/A	N/A	N/A	N/A	126.1	126.1	-.002 (mmu)	N/A	N/A	N/A	Method	True	False	N/A	N/A	N/A			Pass	Pass	N/A	N/A	N/A	Confirmed	N/A
27	Processed	190510-027		Unknown		390									SCN-Bimane	T1	Target Compound	2463	5547	2.23	2.22	-0.01		M+	16.861	N/A	16.861	N/A	111	111	.000 (mmu)	0.847	1	6549	Method	True	False	N/A	N/A	N/A			Pass	Pass	N/A	N/A	N/A	Confirmed	N/A
27	Processed	190510-027		Unknown		390									SCN-Bimane	T1C1	Target Compound	976	2532	2.22	2.24	-0.02		M+	N/A	N/A	N/A	N/A	124.1	124.1	-.002 (mmu)	0.847	N/A	N/A	Method	True	False	N/A	N/A	N/A			Pass	Pass	N/A	N/A	N/A	Confirmed	N/A
27	Processed	190510-027		Unknown		390									SCN-Bimane IS	T1	Internal Standard	2742	6549	2.24	2.23	-0.01		M+	1	1	1	N/A	111	111	.000 (mmu)	N/A	N/A	N/A	Method	True	False	N/A	N/A	N/A			Pass	Pass	N/A	N/A	N/A	Confirmed	N/A
27	Processed	190510-027		Unknown		390									SCN-Bimane IS	T1C1	Internal Standard	1291	3636	2.23	2.22	0.01		M+	N/A	N/A	N/A	N/A	126.1	126.1	-.002 (mmu)	N/A	N/A	N/A	Method	True	False	N/A	N/A	N/A			Pass	Pass	N/A	N/A	N/A	Confirmed	N/A
[truncated: 15 more columns]

## Sheet: Data
	Sample ID	Analyte Area	IS Area	Area Ratio	Calculated Amt	Concentration Ratio
	5 ppb SCN	1675	6441	0.260053	5.322	0.0488637
	10 ppb SCN	2964	6232	0.47561	9.56	0.04975
	25 ppb SCN	7808	6044	1.29186	25.607	0.0504495
	50 ppb SCN	15064	6720	2.24167	44.285	0.0506191
	100 ppb SCN	31662	7779	4.07019	80.227	0.0507334
	335	39365	7865	5.00509	98.619	0.0507517
	336	33564	7499	4.4758	88.201	0.0507454
	337	31317	7988	3.92051	77.29	0.0507246
	338	29577	7083	4.17577	82.312	0.050731
	339	25783	7375	3.496	68.941	0.05071
	340	22073	7256	3.04203	60.02	0.0506837
	341	40338	8168	4.93854	97.301	0.0507553
	342	42991	8068	5.32858	104.973	0.0507615
	343	30533	7682	3.97462	78.356	0.0507251
	344	14706	6739	2.18222	43.111	0.0506187
	345	16559	7111	2.32865	45.991	0.0506326
	346	45077	8084	5.57608	109.84	0.0507654
	347	5341	6619	0.806919	16.075	0.0501972
	348	6672	6373	1.04692	20.794	0.0503471
	349	7524	6812	1.10452	21.925	0.0503773
	350	8366	6478	1.29145	25.601	0.0504452
	351	9247	6489	1.42503	28.226	0.0504863
	352	10690	6510	1.64209	32.495	0.0505336
	387	3343	6593	0.507053	10.18	0.0498087
	389	5523	7063	0.781962	15.585	0.050174
	390	5547	6549	0.847	16.861	0.0502342
