# Supplementary material for: The determination of thiocyanate in the blood plasma and holding water of Amphiprion clarkii after exposure to cyanide
Source: PeerJ. 2021 Dec 7;9:e12409. doi: 10.7717/peerj.12409 (PMC8663612; doi:10.7717/peerj.12409)
Supplement: Supplemental Information 5 [file peerj-09-12409-s005.xlsx]

## Sheet: All Samples
Batch Order	Status	Filename	Group	Sample Type	Level	Sample ID	Sample Name	Comments	ColumnHeader1	ColumnHeader2	ColumnHeader3	ColumnHeader4	ColumnHeader5	ColumnHeader6	Compound	Peak Label	Type	Height	Area	RT	Actual RT	RT Delta	Formula	Adduct	Calculated Amt	Theoretical Amt	Sample Amt	Std Add Amount	m/z (Expected)	m/z (Apex)	m/z (Delta)	Response Ratio	ISTD Amt	ISTD Response	Integration Mode	Active	Excluded	%Diff	%RSD	% CV	Channel	Final Units	PK	IR	IP	LS	FI	Confirm	Isotopic Pattern Score (%)
1	Processed	190522-001		Unknown		1000									SCN-Bimane	T1	Target Compound	76	136	2.23	2.28	0.05		M+	0.805	N/A	0.805	N/A	111	111	.000 (mmu)	0.044	1	3078	Method	True	False	N/A	N/A	N/A			Pass	Fail	N/A	N/A	N/A	Identified	N/A
1	Processed	190522-001		Unknown		1000									SCN-Bimane	T1C1	Target Compound	2	1	2.28	2.27	0.01		M+	N/A	N/A	N/A	N/A	124.1	124.1	-.002 (mmu)	0.044	N/A	N/A	Method	True	False	N/A	N/A	N/A			Pass	Fail	N/A	N/A	N/A	Identified	N/A
1	Processed	190522-001		Unknown		1000									SCN-Bimane IS	T1	Internal Standard	1258	3078	2.24	2.28	0.04		M+	1	1	1	N/A	111	111	.000 (mmu)	N/A	N/A	N/A	Method	True	False	N/A	N/A	N/A			Pass	Fail	N/A	N/A	N/A	Identified	N/A
1	Processed	190522-001		Unknown		1000									SCN-Bimane IS	T1C1	Internal Standard	588	1554	2.28	2.28	0.00		M+	N/A	N/A	N/A	N/A	126.1	126.1	-.002 (mmu)	N/A	N/A	N/A	Method	True	False	N/A	N/A	N/A			Pass	Fail	N/A	N/A	N/A	Identified	N/A
2	Processed	190522-002		Unknown		1001									SCN-Bimane	T1	Target Compound	69	87	2.23	2.23	0.00		M+	0.511	N/A	0.511	N/A	111	111	.000 (mmu)	0.031	1	2778	Method	True	False	N/A	N/A	N/A			Pass	Fail	N/A	N/A	N/A	Identified	N/A
2	Processed	190522-002		Unknown		1001									SCN-Bimane	T1C1	Target Compound	29	22	2.23	2.23	-0.01		M+	N/A	N/A	N/A	N/A	124.1	124.1	-.002 (mmu)	0.031	N/A	N/A	Method	True	False	N/A	N/A	N/A			Pass	Fail	N/A	N/A	N/A	Identified	N/A
2	Processed	190522-002		Unknown		1001									SCN-Bimane IS	T1	Internal Standard	1220	2778	2.24	2.23	-0.01		M+	1	1	1	N/A	111	111	.000 (mmu)	N/A	N/A	N/A	Method	True	False	N/A	N/A	N/A			Pass	Fail	N/A	N/A	N/A	Identified	N/A
2	Processed	190522-002		Unknown		1001									SCN-Bimane IS	T1C1	Internal Standard	615	1362	2.23	2.23	0.01		M+	N/A	N/A	N/A	N/A	126.1	126.1	-.002 (mmu)	N/A	N/A	N/A	Method	True	False	N/A	N/A	N/A			Pass	Fail	N/A	N/A	N/A	Identified	N/A
3	Processed	190522-003		Unknown		1002									SCN-Bimane	T1	Target Compound	27	36	2.23	2.23	0.00		M+	0.08	N/A	0.08	N/A	111	111	.000 (mmu)	0.012	1	2876	Method	True	False	N/A	N/A	N/A			Pass	Fail	N/A	N/A	N/A	Identified	N/A
3	Processed	190522-003		Unknown		1002									SCN-Bimane	T1C1	Target Compound	11	12	2.23	2.23	0.00		M+	N/A	N/A	N/A	N/A	124.1	124.1	-.002 (mmu)	0.012	N/A	N/A	Method	True	False	N/A	N/A	N/A			Pass	Fail	N/A	N/A	N/A	Identified	N/A
3	Processed	190522-003		Unknown		1002									SCN-Bimane IS	T1	Internal Standard	1352	2876	2.24	2.23	-0.01		M+	1	1	1	N/A	111	111	.000 (mmu)	N/A	N/A	N/A	Method	True	False	N/A	N/A	N/A			Pass	Fail	N/A	N/A	N/A	Identified	N/A
3	Processed	190522-003		Unknown		1002									SCN-Bimane IS	T1C1	Internal Standard	627	1415	2.23	2.23	0.00		M+	N/A	N/A	N/A	N/A	126.1	126.1	-.002 (mmu)	N/A	N/A	N/A	Method	True	False	N/A	N/A	N/A			Pass	Fail	N/A	N/A	N/A	Identified	N/A
4	Processed	190522-004		Unknown		1003									SCN-Bimane	T1	Target Compound	22	27	2.23	2.25	0.02		M+	-0.01	N/A	-0.01	N/A	111	111	.000 (mmu)	0.008	1	3250	Method	True	False	N/A	N/A	N/A			Pass	Fail	N/A	N/A	N/A	Identified	N/A
4	Processed	190522-004		Unknown		1003									SCN-Bimane	T1C1	Target Compound	22	22	2.25	2.22	0.03		M+	N/A	N/A	N/A	N/A	124.1	124.1	-.002 (mmu)	0.008	N/A	N/A	Method	True	False	N/A	N/A	N/A			Pass	Fail	N/A	N/A	N/A	Identified	N/A
4	Processed	190522-004		Unknown		1003									SCN-Bimane IS	T1	Internal Standard	1229	3250	2.24	2.23	-0.01		M+	1	1	1	N/A	111	111	.000 (mmu)	N/A	N/A	N/A	Method	True	False	N/A	N/A	N/A			Pass	Pass	N/A	N/A	N/A	Confirmed	N/A
4	Processed	190522-004		Unknown		1003									SCN-Bimane IS	T1C1	Internal Standard	640	2042	2.23	2.22	0.01		M+	N/A	N/A	N/A	N/A	126.1	126.1	-.002 (mmu)	N/A	N/A	N/A	Method	True	False	N/A	N/A	N/A			Pass	Pass	N/A	N/A	N/A	Confirmed	N/A
5	Processed	190522-005		Unknown		1004									SCN-Bimane	T1	Target Compound	13	11	2.23	2.27	0.04		M+	-0.022	N/A	-0.022	N/A	111	111	.000 (mmu)	0.008	1	1362	Method	True	False	N/A	N/A	N/A			Pass	Fail	N/A	N/A	N/A	Identified	N/A
5	Processed	190522-005		Unknown		1004									SCN-Bimane	T1C1	Target Compound	N/F	N/F	2.27	N/A	N/A		M+	N/A	N/A	N/A	N/A	124.1	N/F	N/A	0.008	N/A	N/A	Method	True	False	N/A	N/A	N/A			Fail	Fail	N/A	N/A	N/A	NotFound	N/A
5	Processed	190522-005		Unknown		1004									SCN-Bimane IS	T1	Internal Standard	517	1362	2.24	2.24	0.00		M+	1	1	1	N/A	111	111	.000 (mmu)	N/A	N/A	N/A	Method	True	False	N/A	N/A	N/A			Pass	Pass	N/A	N/A	N/A	Confirmed	N/A
5	Processed	190522-005		Unknown		1004									SCN-Bimane IS	T1C1	Internal Standard	269	817	2.24	2.24	0.01		M+	N/A	N/A	N/A	N/A	126.1	126.1	-.002 (mmu)	N/A	N/A	N/A	Method	True	False	N/A	N/A	N/A			Pass	Pass	N/A	N/A	N/A	Confirmed	N/A
6	Processed	190522-006		Unknown		1005									SCN-Bimane	T1	Target Compound	57	67	2.23	2.22	-0.01		M+	0.404	N/A	0.404	N/A	111	111	.000 (mmu)	0.027	1	2501	Method	True	False	N/A	N/A	N/A			Pass	Fail	N/A	N/A	N/A	Identified	N/A
6	Processed	190522-006		Unknown		1005									SCN-Bimane	T1C1	Target Compound	18	8	2.22	2.23	-0.01		M+	N/A	N/A	N/A	N/A	124.1	124.1	-.002 (mmu)	0.027	N/A	N/A	Method	True	False	N/A	N/A	N/A			Pass	Fail	N/A	N/A	N/A	Identified	N/A
6	Processed	190522-006		Unknown		1005									SCN-Bimane IS	T1	Internal Standard	1017	2501	2.24	2.24	0.00		M+	1	1	1	N/A	111	111	.000 (mmu)	N/A	N/A	N/A	Method	True	False	N/A	N/A	N/A			Pass	Fail	N/A	N/A	N/A	Identified	N/A
6	Processed	190522-006		Unknown		1005									SCN-Bimane IS	T1C1	Internal Standard	446	1293	2.24	2.23	0.01		M+	N/A	N/A	N/A	N/A	126.1	126.1	-.002 (mmu)	N/A	N/A	N/A	Method	True	False	N/A	N/A	N/A			Pass	Fail	N/A	N/A	N/A	Identified	N/A
7	Processed	190522-007		Unknown		1006									SCN-Bimane	T1	Target Compound	28	30	2.23	2.24	0.01		M+	0.119	N/A	0.119	N/A	111	111	.000 (mmu)	0.014	1	2169	Method	True	False	N/A	N/A	N/A			Pass	Fail	N/A	N/A	N/A	Identified	N/A
7	Processed	190522-007		Unknown		1006									SCN-Bimane	T1C1	Target Compound	7	3	2.24	2.25	-0.01		M+	N/A	N/A	N/A	N/A	124.1	124.1	-.002 (mmu)	0.014	N/A	N/A	Method	True	False	N/A	N/A	N/A			Pass	Fail	N/A	N/A	N/A	Identified	N/A
7	Processed	190522-007		Unknown		1006									SCN-Bimane IS	T1	Internal Standard	789	2169	2.24	2.24	0.00		M+	1	1	1	N/A	111	111	.000 (mmu)	N/A	N/A	N/A	Method	True	False	N/A	N/A	N/A			Pass	Fail	N/A	N/A	N/A	Identified	N/A
7	Processed	190522-007		Unknown		1006									SCN-Bimane IS	T1C1	Internal Standard	420	1095	2.24	2.24	0.00		M+	N/A	N/A	N/A	N/A	126.1	126.1	-.002 (mmu)	N/A	N/A	N/A	Method	True	False	N/A	N/A	N/A			Pass	Fail	N/A	N/A	N/A	Identified	N/A
8	Processed	190522-008		Unknown		1007									SCN-Bimane	T1	Target Compound	15	8	2.23	2.25	0.02		M+	-0.082	N/A	-0.082	N/A	111	111	.000 (mmu)	0.005	1	1575	Method	True	False	N/A	N/A	N/A			Pass	Fail	N/A	N/A	N/A	Identified	N/A
8	Processed	190522-008		Unknown		1007									SCN-Bimane	T1C1	Target Compound	3	1	2.25	2.19	0.06		M+	N/A	N/A	N/A	N/A	124.1	124.1	-.002 (mmu)	0.005	N/A	N/A	Method	True	False	N/A	N/A	N/A			Pass	Fail	N/A	N/A	N/A	Identified	N/A
8	Processed	190522-008		Unknown		1007									SCN-Bimane IS	T1	Internal Standard	632	1575	2.24	2.23	-0.01		M+	1	1	1	N/A	111	111	.000 (mmu)	N/A	N/A	N/A	Method	True	False	N/A	N/A	N/A			Pass	Fail	N/A	N/A	N/A	Identified	N/A
8	Processed	190522-008		Unknown		1007									SCN-Bimane IS	T1C1	Internal Standard	301	799	2.23	2.22	0.01		M+	N/A	N/A	N/A	N/A	126.1	126.1	-.002 (mmu)	N/A	N/A	N/A	Method	True	False	N/A	N/A	N/A			Pass	Fail	N/A	N/A	N/A	Identified	N/A
9	Processed	190522-009		Unknown		1008									SCN-Bimane	T1	Target Compound	N/F	N/F	2.23	N/F	N/F		N/A	N/F	N/A	N/F	N/A	111	N/F	N/F	N/F	1	1268	Method	True	False	N/A	N/A	N/A			Fail	N/A	N/A	N/A	N/A	NotFound	N/A
9	Processed	190522-009		Unknown		1008									SCN-Bimane	T1C1	Target Compound	N/F	N/F	0	N/A	N/A		M+	N/A	N/A	N/A	N/A	124.1	N/F	N/A	N/F	N/A	N/A	Method	True	False	N/A	N/A	N/A			Fail	N/A	N/A	N/A	N/A	NotFound	N/A
9	Processed	190522-009		Unknown		1008									SCN-Bimane IS	T1	Internal Standard	514	1268	2.24	2.23	-0.01		M+	1	1	1	N/A	111	111	.000 (mmu)	N/A	N/A	N/A	Method	True	False	N/A	N/A	N/A			Pass	Pass	N/A	N/A	N/A	Confirmed	N/A
9	Processed	190522-009		Unknown		1008									SCN-Bimane IS	T1C1	Internal Standard	288	708	2.23	2.23	0.00		M+	N/A	N/A	N/A	N/A	126.1	126.1	-.002 (mmu)	N/A	N/A	N/A	Method	True	False	N/A	N/A	N/A			Pass	Pass	N/A	N/A	N/A	Confirmed	N/A
10	Processed	190522-010		Unknown		1009									SCN-Bimane	T1	Target Compound	1	0	2.23	2.23	0.00		M+	-0.197	N/A	-0.197	N/A	111	111	.000 (mmu)	0	1	1749	Method	True	False	N/A	N/A	N/A			Pass	Pass	N/A	N/A	N/A	Confirmed	N/A
10	Processed	190522-010		Unknown		1009									SCN-Bimane	T1C1	Target Compound	0	0	2.23	2.21	0.02		M+	N/A	N/A	N/A	N/A	124.1	124.1	-.002 (mmu)	0	N/A	N/A	Method	True	False	N/A	N/A	N/A			Pass	Pass	N/A	N/A	N/A	Confirmed	N/A
10	Processed	190522-010		Unknown		1009									SCN-Bimane IS	T1	Internal Standard	683	1749	2.24	2.23	-0.01		M+	1	1	1	N/A	111	111	.000 (mmu)	N/A	N/A	N/A	Method	True	False	N/A	N/A	N/A			Pass	Pass	N/A	N/A	N/A	Confirmed	N/A
10	Processed	190522-010		Unknown		1009									SCN-Bimane IS	T1C1	Internal Standard	334	1041	2.23	2.23	0.01		M+	N/A	N/A	N/A	N/A	126.1	126.1	-.002 (mmu)	N/A	N/A	N/A	Method	True	False	N/A	N/A	N/A			Pass	Pass	N/A	N/A	N/A	Confirmed	N/A
11	Processed	190522-011		Unknown		1010									SCN-Bimane	T1	Target Compound	N/F	N/F	2.23	N/F	N/F		N/A	N/F	N/A	N/F	N/A	111	N/F	N/F	N/F	1	1003	Method	True	False	N/A	N/A	N/A			Fail	N/A	N/A	N/A	N/A	NotFound	N/A
11	Processed	190522-011		Unknown		1010									SCN-Bimane	T1C1	Target Compound	N/F	N/F	0	N/A	N/A		M+	N/A	N/A	N/A	N/A	124.1	N/F	N/A	N/F	N/A	N/A	Method	True	False	N/A	N/A	N/A			Fail	N/A	N/A	N/A	N/A	NotFound	N/A
11	Processed	190522-011		Unknown		1010									SCN-Bimane IS	T1	Internal Standard	488	1003	2.24	2.24	0.00		M+	1	1	1	N/A	111	111	.000 (mmu)	N/A	N/A	N/A	Method	True	False	N/A	N/A	N/A			Pass	Pass	N/A	N/A	N/A	Confirmed	N/A
11	Processed	190522-011		Unknown		1010									SCN-Bimane IS	T1C1	Internal Standard	295	647	2.24	2.21	0.02		M+	N/A	N/A	N/A	N/A	126.1	126.1	-.002 (mmu)	N/A	N/A	N/A	Method	True	False	N/A	N/A	N/A			Pass	Pass	N/A	N/A	N/A	Confirmed	N/A
12	Processed	190522-012		Unknown		1011									SCN-Bimane	T1	Target Compound	17	10	2.23	2.23	0.00		M+	-0.116	N/A	-0.116	N/A	111	111	.000 (mmu)	0.004	1	2668	Method	True	False	N/A	N/A	N/A			Pass	Fail	N/A	N/A	N/A	Identified	N/A
12	Processed	190522-012		Unknown		1011									SCN-Bimane	T1C1	Target Compound	0	0	2.23	2.21	0.01		M+	N/A	N/A	N/A	N/A	124.1	124.1	-.002 (mmu)	0.004	N/A	N/A	Method	True	False	N/A	N/A	N/A			Pass	Fail	N/A	N/A	N/A	Identified	N/A
12	Processed	190522-012		Unknown		1011									SCN-Bimane IS	T1	Internal Standard	958	2668	2.24	2.24	0.00		M+	1	1	1	N/A	111	111	.000 (mmu)	N/A	N/A	N/A	Method	True	False	N/A	N/A	N/A			Pass	Pass	N/A	N/A	N/A	Confirmed	N/A
12	Processed	190522-012		Unknown		1011									SCN-Bimane IS	T1C1	Internal Standard	441	1458	2.24	2.23	0.01		M+	N/A	N/A	N/A	N/A	126.1	126.1	-.002 (mmu)	N/A	N/A	N/A	Method	True	False	N/A	N/A	N/A			Pass	Pass	N/A	N/A	N/A	Confirmed	N/A
13	Processed	190522-013		Unknown		1012									SCN-Bimane	T1	Target Compound	43	81	2.23	2.24	0.01		M+	0.868	N/A	0.868	N/A	111	111	.000 (mmu)	0.047	1	1719	Method	True	False	N/A	N/A	N/A			Pass	Fail	N/A	N/A	N/A	Identified	N/A
13	Processed	190522-013		Unknown		1012									SCN-Bimane	T1C1	Target Compound	58	50	2.24	2.24	0.00		M+	N/A	N/A	N/A	N/A	124.1	124.1	-.002 (mmu)	0.047	N/A	N/A	Method	True	False	N/A	N/A	N/A			Pass	Fail	N/A	N/A	N/A	Identified	N/A
13	Processed	190522-013		Unknown		1012									SCN-Bimane IS	T1	Internal Standard	646	1719	2.24	2.24	0.00		M+	1	1	1	N/A	111	111	.000 (mmu)	N/A	N/A	N/A	Method	True	False	N/A	N/A	N/A			Pass	Pass	N/A	N/A	N/A	Confirmed	N/A
13	Processed	190522-013		Unknown		1012									SCN-Bimane IS	T1C1	Internal Standard	418	1164	2.24	2.24	0.00		M+	N/A	N/A	N/A	N/A	126.1	126.1	-.002 (mmu)	N/A	N/A	N/A	Method	True	False	N/A	N/A	N/A			Pass	Pass	N/A	N/A	N/A	Confirmed	N/A
14	Processed	190522-014		Unknown		1013									SCN-Bimane	T1	Target Compound	8	3	2.23	2.15	-0.08		M+	-0.16	N/A	-0.16	N/A	111	111	.000 (mmu)	0.002	1	1942	Method	True	False	N/A	N/A	N/A			Pass	Fail	N/A	N/A	N/A	Identified	N/A
14	Processed	190522-014		Unknown		1013									SCN-Bimane	T1C1	Target Compound	0	0	2.15	2.24	-0.09		M+	N/A	N/A	N/A	N/A	124.1	124.1	-.002 (mmu)	0.002	N/A	N/A	Method	True	False	N/A	N/A	N/A			Pass	Fail	N/A	N/A	N/A	Identified	N/A
14	Processed	190522-014		Unknown		1013									SCN-Bimane IS	T1	Internal Standard	744	1942	2.24	2.24	0.00		M+	1	1	1	N/A	111	111	.000 (mmu)	N/A	N/A	N/A	Method	True	False	N/A	N/A	N/A			Pass	Pass	N/A	N/A	N/A	Confirmed	N/A
14	Processed	190522-014		Unknown		1013									SCN-Bimane IS	T1C1	Internal Standard	467	1256	2.24	2.23	0.01		M+	N/A	N/A	N/A	N/A	126.1	126.1	-.002 (mmu)	N/A	N/A	N/A	Method	True	False	N/A	N/A	N/A			Pass	Pass	N/A	N/A	N/A	Confirmed	N/A
15	Processed	190522-015		Unknown		1014									SCN-Bimane	T1	Target Compound	20	15	2.23	2.23	0.00		M+	-0.04	N/A	-0.04	N/A	111	111	.000 (mmu)	0.007	1	2051	Method	True	False	N/A	N/A	N/A			Pass	Pass	N/A	N/A	N/A	Confirmed	N/A
15	Processed	190522-015		Unknown		1014									SCN-Bimane	T1C1	Target Compound	11	7	2.23	2.22	0.00		M+	N/A	N/A	N/A	N/A	124.1	124.1	-.002 (mmu)	0.007	N/A	N/A	Method	True	False	N/A	N/A	N/A			Pass	Pass	N/A	N/A	N/A	Confirmed	N/A
15	Processed	190522-015		Unknown		1014									SCN-Bimane IS	T1	Internal Standard	890	2051	2.24	2.23	-0.01		M+	1	1	1	N/A	111	111	.000 (mmu)	N/A	N/A	N/A	Method	True	False	N/A	N/A	N/A			Pass	Pass	N/A	N/A	N/A	Confirmed	N/A
15	Processed	190522-015		Unknown		1014									SCN-Bimane IS	T1C1	Internal Standard	403	1367	2.23	2.23	0.00		M+	N/A	N/A	N/A	N/A	126.1	126.1	-.002 (mmu)	N/A	N/A	N/A	Method	True	False	N/A	N/A	N/A			Pass	Pass	N/A	N/A	N/A	Confirmed	N/A
16	Processed	190522-016		Unknown		1015									SCN-Bimane	T1	Target Compound	42	83	2.23	2.24	0.01		M+	0.679	N/A	0.679	N/A	111	111	.000 (mmu)	0.039	1	2154	Method	True	False	N/A	N/A	N/A			Pass	Fail	N/A	N/A	N/A	Identified	N/A
16	Processed	190522-016		Unknown		1015									SCN-Bimane	T1C1	Target Compound	5	3	2.24	2.23	0.01		M+	N/A	N/A	N/A	N/A	124.1	124.1	-.002 (mmu)	0.039	N/A	N/A	Method	True	False	N/A	N/A	N/A			Pass	Fail	N/A	N/A	N/A	Identified	N/A
16	Processed	190522-016		Unknown		1015									SCN-Bimane IS	T1	Internal Standard	797	2154	2.24	2.23	-0.01		M+	1	1	1	N/A	111	111	.000 (mmu)	N/A	N/A	N/A	Method	True	False	N/A	N/A	N/A			Pass	Pass	N/A	N/A	N/A	Confirmed	N/A
16	Processed	190522-016		Unknown		1015									SCN-Bimane IS	T1C1	Internal Standard	445	1526	2.23	2.24	-0.01		M+	N/A	N/A	N/A	N/A	126.1	126.1	-.002 (mmu)	N/A	N/A	N/A	Method	True	False	N/A	N/A	N/A			Pass	Pass	N/A	N/A	N/A	Confirmed	N/A
17	Processed	190522-017		Unknown		1016									SCN-Bimane	T1	Target Compound	6	4	2.23	2.21	-0.02		M+	-0.148	N/A	-0.148	N/A	111	111	.000 (mmu)	0.002	1	1817	Method	True	False	N/A	N/A	N/A			Pass	Fail	N/A	N/A	N/A	Identified	N/A
17	Processed	190522-017		Unknown		1016									SCN-Bimane	T1C1	Target Compound	0	0	2.21	2.22	-0.01		M+	N/A	N/A	N/A	N/A	124.1	124.1	-.002 (mmu)	0.002	N/A	N/A	Method	True	False	N/A	N/A	N/A			Pass	Fail	N/A	N/A	N/A	Identified	N/A
17	Processed	190522-017		Unknown		1016									SCN-Bimane IS	T1	Internal Standard	628	1817	2.24	2.22	-0.02		M+	1	1	1	N/A	111	111	.000 (mmu)	N/A	N/A	N/A	Method	True	False	N/A	N/A	N/A			Pass	Pass	N/A	N/A	N/A	Confirmed	N/A
17	Processed	190522-017		Unknown		1016									SCN-Bimane IS	T1C1	Internal Standard	402	1110	2.22	2.22	0.00		M+	N/A	N/A	N/A	N/A	126.1	126.1	-.002 (mmu)	N/A	N/A	N/A	Method	True	False	N/A	N/A	N/A			Pass	Pass	N/A	N/A	N/A	Confirmed	N/A
18	Processed	190522-018		Unknown		1017									SCN-Bimane	T1	Target Compound	15	10	2.23	2.21	-0.02		M+	-0.093	N/A	-0.093	N/A	111	111	.000 (mmu)	0.005	1	2040	Method	True	False	N/A	N/A	N/A			Pass	Fail	N/A	N/A	N/A	Identified	N/A
18	Processed	190522-018		Unknown		1017									SCN-Bimane	T1C1	Target Compound	19	8	2.21	2.22	-0.01		M+	N/A	N/A	N/A	N/A	124.1	124.1	-.002 (mmu)	0.005	N/A	N/A	Method	True	False	N/A	N/A	N/A			Pass	Fail	N/A	N/A	N/A	Identified	N/A
18	Processed	190522-018		Unknown		1017									SCN-Bimane IS	T1	Internal Standard	700	2040	2.24	2.24	0.00		M+	1	1	1	N/A	111	111	.000 (mmu)	N/A	N/A	N/A	Method	True	False	N/A	N/A	N/A			Pass	Pass	N/A	N/A	N/A	Confirmed	N/A
18	Processed	190522-018		Unknown		1017									SCN-Bimane IS	T1C1	Internal Standard	407	1248	2.24	2.24	0.00		M+	N/A	N/A	N/A	N/A	126.1	126.1	-.002 (mmu)	N/A	N/A	N/A	Method	True	False	N/A	N/A	N/A			Pass	Pass	N/A	N/A	N/A	Confirmed	N/A
19	Processed	190522-019		Unknown		1018									SCN-Bimane	T1	Target Compound	72	85	2.23	2.23	0.00		M+	0.892	N/A	0.892	N/A	111	111	.000 (mmu)	0.048	1	1771	Method	True	False	N/A	N/A	N/A			Pass	Fail	N/A	N/A	N/A	Identified	N/A
19	Processed	190522-019		Unknown		1018									SCN-Bimane	T1C1	Target Compound	2	1	2.23	2.23	0.00		M+	N/A	N/A	N/A	N/A	124.1	124.1	-.002 (mmu)	0.048	N/A	N/A	Method	True	False	N/A	N/A	N/A			Pass	Fail	N/A	N/A	N/A	Identified	N/A
19	Processed	190522-019		Unknown		1018									SCN-Bimane IS	T1	Internal Standard	669	1771	2.24	2.24	0.00		M+	1	1	1	N/A	111	111	.000 (mmu)	N/A	N/A	N/A	Method	True	False	N/A	N/A	N/A			Pass	Pass	N/A	N/A	N/A	Confirmed	N/A
19	Processed	190522-019		Unknown		1018									SCN-Bimane IS	T1C1	Internal Standard	352	1037	2.24	2.23	0.01		M+	N/A	N/A	N/A	N/A	126.1	126.1	-.002 (mmu)	N/A	N/A	N/A	Method	True	False	N/A	N/A	N/A			Pass	Pass	N/A	N/A	N/A	Confirmed	N/A
20	Processed	190522-020		Unknown		1019									SCN-Bimane	T1	Target Compound	30	40	2.23	2.24	0.01		M+	0.237	N/A	0.237	N/A	111	111	.000 (mmu)	0.019	1	2073	Method	True	False	N/A	N/A	N/A			Pass	Fail	N/A	N/A	N/A	Identified	N/A
20	Processed	190522-020		Unknown		1019									SCN-Bimane	T1C1	Target Compound	9	7	2.24	2.23	0.01		M+	N/A	N/A	N/A	N/A	124.1	124.1	-.002 (mmu)	0.019	N/A	N/A	Method	True	False	N/A	N/A	N/A			Pass	Fail	N/A	N/A	N/A	Identified	N/A
20	Processed	190522-020		Unknown		1019									SCN-Bimane IS	T1	Internal Standard	802	2073	2.24	2.24	0.00		M+	1	1	1	N/A	111	111	.000 (mmu)	N/A	N/A	N/A	Method	True	False	N/A	N/A	N/A			Pass	Pass	N/A	N/A	N/A	Confirmed	N/A
20	Processed	190522-020		Unknown		1019									SCN-Bimane IS	T1C1	Internal Standard	417	1312	2.24	2.23	0.01		M+	N/A	N/A	N/A	N/A	126.1	126.1	-.002 (mmu)	N/A	N/A	N/A	Method	True	False	N/A	N/A	N/A			Pass	Pass	N/A	N/A	N/A	Confirmed	N/A
21	Processed	190522-021		Unknown		1020									SCN-Bimane	T1	Target Compound	53	76	2.23	2.23	0.00		M+	0.643	N/A	0.643	N/A	111	111	.000 (mmu)	0.037	1	2054	Method	True	False	N/A	N/A	N/A			Pass	Fail	N/A	N/A	N/A	Identified	N/A
21	Processed	190522-021		Unknown		1020									SCN-Bimane	T1C1	Target Compound	46	72	2.23	2.23	0.00		M+	N/A	N/A	N/A	N/A	124.1	124.1	-.002 (mmu)	0.037	N/A	N/A	Method	True	False	N/A	N/A	N/A			Pass	Fail	N/A	N/A	N/A	Identified	N/A
21	Processed	190522-021		Unknown		1020									SCN-Bimane IS	T1	Internal Standard	794	2054	2.24	2.23	-0.01		M+	1	1	1	N/A	111	111	.000 (mmu)	N/A	N/A	N/A	Method	True	False	N/A	N/A	N/A			Pass	Pass	N/A	N/A	N/A	Confirmed	N/A
21	Processed	190522-021		Unknown		1020									SCN-Bimane IS	T1C1	Internal Standard	441	1432	2.23	2.23	0.00		M+	N/A	N/A	N/A	N/A	126.1	126.1	-.002 (mmu)	N/A	N/A	N/A	Method	True	False	N/A	N/A	N/A			Pass	Pass	N/A	N/A	N/A	Confirmed	N/A
22	Processed	190522-022		Unknown		1021									SCN-Bimane	T1	Target Compound	49	48	2.23	2.24	0.01		M+	0.259	N/A	0.259	N/A	111	111	.000 (mmu)	0.02	1	2354	Method	True	False	N/A	N/A	N/A			Pass	Pass	N/A	N/A	N/A	Confirmed	N/A
22	Processed	190522-022		Unknown		1021									SCN-Bimane	T1C1	Target Compound	46	23	2.24	2.26	-0.02		M+	N/A	N/A	N/A	N/A	124.1	124.1	-.002 (mmu)	0.02	N/A	N/A	Method	True	False	N/A	N/A	N/A			Pass	Pass	N/A	N/A	N/A	Confirmed	N/A
22	Processed	190522-022		Unknown		1021									SCN-Bimane IS	T1	Internal Standard	868	2354	2.24	2.23	-0.01		M+	1	1	1	N/A	111	111	.000 (mmu)	N/A	N/A	N/A	Method	True	False	N/A	N/A	N/A			Pass	Pass	N/A	N/A	N/A	Confirmed	N/A
22	Processed	190522-022		Unknown		1021									SCN-Bimane IS	T1C1	Internal Standard	427	1452	2.23	2.24	-0.01		M+	N/A	N/A	N/A	N/A	126.1	126.1	-.002 (mmu)	N/A	N/A	N/A	Method	True	False	N/A	N/A	N/A			Pass	Pass	N/A	N/A	N/A	Confirmed	N/A
23	Processed	190522-023		Unknown		1022									SCN-Bimane	T1	Target Compound	36	36	2.23	2.22	-0.01		M+	0.116	N/A	0.116	N/A	111	111	.000 (mmu)	0.014	1	2598	Method	True	False	N/A	N/A	N/A			Pass	Pass	N/A	N/A	N/A	Confirmed	N/A
23	Processed	190522-023		Unknown		1022									SCN-Bimane	T1C1	Target Compound	22	17	2.22	2.23	0.00		M+	N/A	N/A	N/A	N/A	124.1	124.1	-.002 (mmu)	0.014	N/A	N/A	Method	True	False	N/A	N/A	N/A			Pass	Pass	N/A	N/A	N/A	Confirmed	N/A
23	Processed	190522-023		Unknown		1022									SCN-Bimane IS	T1	Internal Standard	1057	2598	2.24	2.24	0.00		M+	1	1	1	N/A	111	111	.000 (mmu)	N/A	N/A	N/A	Method	True	False	N/A	N/A	N/A			Pass	Pass	N/A	N/A	N/A	Confirmed	N/A
23	Processed	190522-023		Unknown		1022									SCN-Bimane IS	T1C1	Internal Standard	527	1603	2.24	2.23	0.01		M+	N/A	N/A	N/A	N/A	126.1	126.1	-.002 (mmu)	N/A	N/A	N/A	Method	True	False	N/A	N/A	N/A			Pass	Pass	N/A	N/A	N/A	Confirmed	N/A
24	Processed	190522-024		Unknown		1023									SCN-Bimane	T1	Target Compound	26	12	2.23	2.23	0.00		M+	-0.085	N/A	-0.085	N/A	111	111	.000 (mmu)	0.005	1	2356	Method	True	False	N/A	N/A	N/A			Pass	Fail	N/A	N/A	N/A	Identified	N/A
24	Processed	190522-024		Unknown		1023									SCN-Bimane	T1C1	Target Compound	0	0	2.23	2.28	-0.05		M+	N/A	N/A	N/A	N/A	124.1	124.1	-.002 (mmu)	0.005	N/A	N/A	Method	True	False	N/A	N/A	N/A			Pass	Fail	N/A	N/A	N/A	Identified	N/A
24	Processed	190522-024		Unknown		1023									SCN-Bimane IS	T1	Internal Standard	822	2356	2.24	2.24	0.00		M+	1	1	1	N/A	111	111	.000 (mmu)	N/A	N/A	N/A	Method	True	False	N/A	N/A	N/A			Pass	Pass	N/A	N/A	N/A	Confirmed	N/A
24	Processed	190522-024		Unknown		1023									SCN-Bimane IS	T1C1	Internal Standard	458	1468	2.24	2.23	0.01		M+	N/A	N/A	N/A	N/A	126.1	126.1	-.002 (mmu)	N/A	N/A	N/A	Method	True	False	N/A	N/A	N/A			Pass	Pass	N/A	N/A	N/A	Confirmed	N/A
25	Processed	190522-025		Unknown		1024									SCN-Bimane	T1	Target Compound	65	80	2.23	2.25	0.02		M+	0.655	N/A	0.655	N/A	111	111	.000 (mmu)	0.038	1	2131	Method	True	False	N/A	N/A	N/A			Pass	Fail	N/A	N/A	N/A	Identified	N/A
25	Processed	190522-025		Unknown		1024									SCN-Bimane	T1C1	Target Compound	10	4	2.25	2.27	-0.01		M+	N/A	N/A	N/A	N/A	124.1	124.1	-.002 (mmu)	0.038	N/A	N/A	Method	True	False	N/A	N/A	N/A			Pass	Fail	N/A	N/A	N/A	Identified	N/A
25	Processed	190522-025		Unknown		1024									SCN-Bimane IS	T1	Internal Standard	755	2131	2.24	2.23	-0.01		M+	1	1	1	N/A	111	111	.000 (mmu)	N/A	N/A	N/A	Method	True	False	N/A	N/A	N/A			Pass	Pass	N/A	N/A	N/A	Confirmed	N/A
25	Processed	190522-025		Unknown		1024									SCN-Bimane IS	T1C1	Internal Standard	503	1269	2.23	2.23	0.00		M+	N/A	N/A	N/A	N/A	126.1	126.1	-.002 (mmu)	N/A	N/A	N/A	Method	True	False	N/A	N/A	N/A			Pass	Pass	N/A	N/A	N/A	Confirmed	N/A
26	Processed	190522-026		Unknown		1025									SCN-Bimane	T1	Target Compound	44	44	2.23	2.24	0.01		M+	0.256	N/A	0.256	N/A	111	111	.000 (mmu)	0.02	1	2177	Method	True	False	N/A	N/A	N/A			Pass	Fail	N/A	N/A	N/A	Identified	N/A
26	Processed	190522-026		Unknown		1025									SCN-Bimane	T1C1	Target Compound	0	0	2.24	2.2	0.04		M+	N/A	N/A	N/A	N/A	124.1	124.1	-.002 (mmu)	0.02	N/A	N/A	Method	True	False	N/A	N/A	N/A			Pass	Fail	N/A	N/A	N/A	Identified	N/A
26	Processed	190522-026		Unknown		1025									SCN-Bimane IS	T1	Internal Standard	940	2177	2.24	2.24	0.00		M+	1	1	1	N/A	111	111	.000 (mmu)	N/A	N/A	N/A	Method	True	False	N/A	N/A	N/A			Pass	Pass	N/A	N/A	N/A	Confirmed	N/A
26	Processed	190522-026		Unknown		1025									SCN-Bimane IS	T1C1	Internal Standard	500	1448	2.24	2.23	0.01		M+	N/A	N/A	N/A	N/A	126.1	126.1	-.002 (mmu)	N/A	N/A	N/A	Method	True	False	N/A	N/A	N/A			Pass	Pass	N/A	N/A	N/A	Confirmed	N/A
27	Processed	190522-027		Unknown		1026									SCN-Bimane	T1	Target Compound	1118	2887	2.23	2.23	0.00		M+	38.599	N/A	38.599	N/A	111	111	.000 (mmu)	1.71	1	1689	Method	True	False	N/A	N/A	N/A			Pass	Pass	N/A	N/A	N/A	Confirmed	N/A
27	Processed	190522-027		Unknown		1026									SCN-Bimane	T1C1	Target Compound	488	1173	2.23	2.23	0.00		M+	N/A	N/A	N/A	N/A	124.1	124.1	-.002 (mmu)	1.71	N/A	N/A	Method	True	False	N/A	N/A	N/A			Pass	Pass	N/A	N/A	N/A	Confirmed	N/A
27	Processed	190522-027		Unknown		1026									SCN-Bimane IS	T1	Internal Standard	712	1689	2.24	2.24	0.00		M+	1	1	1	N/A	111	111	.000 (mmu)	N/A	N/A	N/A	Method	True	False	N/A	N/A	N/A			Pass	Pass	N/A	N/A	N/A	Confirmed	N/A
27	Processed	190522-027		Unknown		1026									SCN-Bimane IS	T1C1	Internal Standard	328	1098	2.24	2.24	0.00		M+	N/A	N/A	N/A	N/A	126.1	126.1	-.002 (mmu)	N/A	N/A	N/A	Method	True	False	N/A	N/A	N/A			Pass	Pass	N/A	N/A	N/A	Confirmed	N/A
28	Processed	190522-028		Unknown		1027									SCN-Bimane	T1	Target Compound	848	2261	2.23	2.24	0.01		M+	19.155	N/A	19.155	N/A	111	111	.000 (mmu)	0.853	1	2651	Method	True	False	N/A	N/A	N/A			Pass	Pass	N/A	N/A	N/A	Confirmed	N/A
28	Processed	190522-028		Unknown		1027									SCN-Bimane	T1C1	Target Compound	433	1058	2.24	2.24	0.00		M+	N/A	N/A	N/A	N/A	124.1	124.1	-.002 (mmu)	0.853	N/A	N/A	Method	True	False	N/A	N/A	N/A			Pass	Pass	N/A	N/A	N/A	Confirmed	N/A
28	Processed	190522-028		Unknown		1027									SCN-Bimane IS	T1	Internal Standard	1112	2651	2.24	2.23	-0.01		M+	1	1	1	N/A	111	111	.000 (mmu)	N/A	N/A	N/A	Method	True	False	N/A	N/A	N/A			Pass	Fail	N/A	N/A	N/A	Identified	N/A
28	Processed	190522-028		Unknown		1027									SCN-Bimane IS	T1C1	Internal Standard	533	1299	2.23	2.23	0.00		M+	N/A	N/A	N/A	N/A	126.1	126.1	-.002 (mmu)	N/A	N/A	N/A	Method	True	False	N/A	N/A	N/A			Pass	Fail	N/A	N/A	N/A	Identified	N/A
29	Processed	190522-029		Unknown		1028									SCN-Bimane	T1	Target Compound	343	750	2.23	2.24	0.01		M+	9.338	N/A	9.338	N/A	111	111	.000 (mmu)	0.42	1	1785	Method	True	False	N/A	N/A	N/A			Pass	Pass	N/A	N/A	N/A	Confirmed	N/A
29	Processed	190522-029		Unknown		1028									SCN-Bimane	T1C1	Target Compound	149	418	2.24	2.24	0.00		M+	N/A	N/A	N/A	N/A	124.1	124.1	-.002 (mmu)	0.42	N/A	N/A	Method	True	False	N/A	N/A	N/A			Pass	Pass	N/A	N/A	N/A	Confirmed	N/A
29	Processed	190522-029		Unknown		1028									SCN-Bimane IS	T1	Internal Standard	616	1785	2.24	2.23	-0.01		M+	1	1	1	N/A	111	111	.000 (mmu)	N/A	N/A	N/A	Method	True	False	N/A	N/A	N/A			Pass	Pass	N/A	N/A	N/A	Confirmed	N/A
29	Processed	190522-029		Unknown		1028									SCN-Bimane IS	T1C1	Internal Standard	289	1078	2.23	2.24	-0.01		M+	N/A	N/A	N/A	N/A	126.1	126.1	-.002 (mmu)	N/A	N/A	N/A	Method	True	False	N/A	N/A	N/A			Pass	Pass	N/A	N/A	N/A	Confirmed	N/A
30	Processed	190522-030		Unknown		1029									SCN-Bimane	T1	Target Compound	242	609	2.23	2.22	-0.01		M+	6.425	N/A	6.425	N/A	111	111	.000 (mmu)	0.292	1	2086	Method	True	False	N/A	N/A	N/A			Pass	Pass	N/A	N/A	N/A	Confirmed	N/A
30	Processed	190522-030		Unknown		1029									SCN-Bimane	T1C1	Target Compound	129	344	2.22	2.23	-0.01		M+	N/A	N/A	N/A	N/A	124.1	124.1	-.002 (mmu)	0.292	N/A	N/A	Method	True	False	N/A	N/A	N/A			Pass	Pass	N/A	N/A	N/A	Confirmed	N/A
30	Processed	190522-030		Unknown		1029									SCN-Bimane IS	T1	Internal Standard	675	2086	2.24	2.24	0.00		M+	1	1	1	N/A	111	111	.000 (mmu)	N/A	N/A	N/A	Method	True	False	N/A	N/A	N/A			Pass	Pass	N/A	N/A	N/A	Confirmed	N/A
30	Processed	190522-030		Unknown		1029									SCN-Bimane IS	T1C1	Internal Standard	403	1152	2.24	2.23	0.01		M+	N/A	N/A	N/A	N/A	126.1	126.1	-.002 (mmu)	N/A	N/A	N/A	Method	True	False	N/A	N/A	N/A			Pass	Pass	N/A	N/A	N/A	Confirmed	N/A
31	Processed	190522-031		Unknown		1030									SCN-Bimane	T1	Target Compound	20	9	2.23	2.24	0.01		M+	-0.087	N/A	-0.087	N/A	111	111	.000 (mmu)	0.005	1	1714	Method	True	False	N/A	N/A	N/A			Pass	Fail	N/A	N/A	N/A	Identified	N/A
31	Processed	190522-031		Unknown		1030									SCN-Bimane	T1C1	Target Compound	1	0	2.24	2.23	0.00		M+	N/A	N/A	N/A	N/A	124.1	124.1	-.002 (mmu)	0.005	N/A	N/A	Method	True	False	N/A	N/A	N/A			Pass	Fail	N/A	N/A	N/A	Identified	N/A
31	Processed	190522-031		Unknown		1030									SCN-Bimane IS	T1	Internal Standard	656	1714	2.24	2.24	0.00		M+	1	1	1	N/A	111	111	.000 (mmu)	N/A	N/A	N/A	Method	True	False	N/A	N/A	N/A			Pass	Pass	N/A	N/A	N/A	Confirmed	N/A
31	Processed	190522-031		Unknown		1030									SCN-Bimane IS	T1C1	Internal Standard	288	907	2.24	2.23	0.01		M+	N/A	N/A	N/A	N/A	126.1	126.1	-.002 (mmu)	N/A	N/A	N/A	Method	True	False	N/A	N/A	N/A			Pass	Pass	N/A	N/A	N/A	Confirmed	N/A
32	Processed	190522-032		Unknown		1031									SCN-Bimane	T1	Target Compound	28	23	2.23	2.21	-0.02		M+	0.045	N/A	0.045	N/A	111	111	.000 (mmu)	0.011	1	2152	Method	True	False	N/A	N/A	N/A			Pass	Fail	N/A	N/A	N/A	Identified	N/A
32	Processed	190522-032		Unknown		1031									SCN-Bimane	T1C1	Target Compound	12	5	2.21	2.2	0.01		M+	N/A	N/A	N/A	N/A	124.1	124.1	-.002 (mmu)	0.011	N/A	N/A	Method	True	False	N/A	N/A	N/A			Pass	Fail	N/A	N/A	N/A	Identified	N/A
32	Processed	190522-032		Unknown		1031									SCN-Bimane IS	T1	Internal Standard	914	2152	2.24	2.23	-0.01		M+	1	1	1	N/A	111	111	.000 (mmu)	N/A	N/A	N/A	Method	True	False	N/A	N/A	N/A			Pass	Pass	N/A	N/A	N/A	Confirmed	N/A
32	Processed	190522-032		Unknown		1031									SCN-Bimane IS	T1C1	Internal Standard	492	1429	2.23	2.24	0.00		M+	N/A	N/A	N/A	N/A	126.1	126.1	-.002 (mmu)	N/A	N/A	N/A	Method	True	False	N/A	N/A	N/A			Pass	Pass	N/A	N/A	N/A	Confirmed	N/A
33	Processed	190522-033		Unknown		1032									SCN-Bimane	T1	Target Compound	635	1754	2.23	2.22	-0.01		M+	16.595	N/A	16.595	N/A	111	111	.000 (mmu)	0.74	1	2370	Method	True	False	N/A	N/A	N/A			Pass	Pass	N/A	N/A	N/A	Confirmed	N/A
33	Processed	190522-033		Unknown		1032									SCN-Bimane	T1C1	Target Compound	354	794	2.22	2.23	0.00		M+	N/A	N/A	N/A	N/A	124.1	124.1	-.002 (mmu)	0.74	N/A	N/A	Method	True	False	N/A	N/A	N/A			Pass	Pass	N/A	N/A	N/A	Confirmed	N/A
33	Processed	190522-033		Unknown		1032									SCN-Bimane IS	T1	Internal Standard	987	2370	2.24	2.24	0.00		M+	1	1	1	N/A	111	111	.000 (mmu)	N/A	N/A	N/A	Method	True	False	N/A	N/A	N/A			Pass	Pass	N/A	N/A	N/A	Confirmed	N/A
33	Processed	190522-033		Unknown		1032									SCN-Bimane IS	T1C1	Internal Standard	488	1548	2.24	2.23	0.01		M+	N/A	N/A	N/A	N/A	126.1	126.1	-.002 (mmu)	N/A	N/A	N/A	Method	True	False	N/A	N/A	N/A			Pass	Pass	N/A	N/A	N/A	Confirmed	N/A
34	Processed	190522-034		Unknown		1033									SCN-Bimane	T1	Target Compound	635	1477	2.23	2.24	0.01		M+	12.712	N/A	12.712	N/A	111	111	.000 (mmu)	0.569	1	2595	Method	True	False	N/A	N/A	N/A			Pass	Pass	N/A	N/A	N/A	Confirmed	N/A
34	Processed	190522-034		Unknown		1033									SCN-Bimane	T1C1	Target Compound	397	758	2.24	2.24	0.00		M+	N/A	N/A	N/A	N/A	124.1	124.1	-.002 (mmu)	0.569	N/A	N/A	Method	True	False	N/A	N/A	N/A			Pass	Pass	N/A	N/A	N/A	Confirmed	N/A
34	Processed	190522-034		Unknown		1033									SCN-Bimane IS	T1	Internal Standard	1029	2595	2.24	2.23	-0.01		M+	1	1	1	N/A	111	111	.000 (mmu)	N/A	N/A	N/A	Method	True	False	N/A	N/A	N/A			Pass	Pass	N/A	N/A	N/A	Confirmed	N/A
34	Processed	190522-034		Unknown		1033									SCN-Bimane IS	T1C1	Internal Standard	446	1468	2.23	2.23	0.00		M+	N/A	N/A	N/A	N/A	126.1	126.1	-.002 (mmu)	N/A	N/A	N/A	Method	True	False	N/A	N/A	N/A			Pass	Pass	N/A	N/A	N/A	Confirmed	N/A
35	Processed	190522-035		Unknown		1034									SCN-Bimane	T1	Target Compound	142	274	2.23	2.23	0.00		M+	2.279	N/A	2.279	N/A	111	111	.000 (mmu)	0.109	1	2505	Method	True	False	N/A	N/A	N/A			Pass	Pass	N/A	N/A	N/A	Confirmed	N/A
35	Processed	190522-035		Unknown		1034									SCN-Bimane	T1C1	Target Compound	92	124	2.23	2.24	-0.01		M+	N/A	N/A	N/A	N/A	124.1	124.1	-.002 (mmu)	0.109	N/A	N/A	Method	True	False	N/A	N/A	N/A			Pass	Pass	N/A	N/A	N/A	Confirmed	N/A
35	Processed	190522-035		Unknown		1034									SCN-Bimane IS	T1	Internal Standard	1114	2505	2.24	2.24	0.00		M+	1	1	1	N/A	111	111	.000 (mmu)	N/A	N/A	N/A	Method	True	False	N/A	N/A	N/A			Pass	Pass	N/A	N/A	N/A	Confirmed	N/A
35	Processed	190522-035		Unknown		1034									SCN-Bimane IS	T1C1	Internal Standard	490	1509	2.24	2.23	0.01		M+	N/A	N/A	N/A	N/A	126.1	126.1	-.002 (mmu)	N/A	N/A	N/A	Method	True	False	N/A	N/A	N/A			Pass	Pass	N/A	N/A	N/A	Confirmed	N/A
36	Processed	190522-036		Unknown		1035									SCN-Bimane	T1	Target Compound	105	126	2.23	2.22	-0.01		M+	2.181	N/A	2.181	N/A	111	111	.000 (mmu)	0.105	1	1203	Method	True	False	N/A	N/A	N/A			Pass	Fail	N/A	N/A	N/A	Identified	N/A
36	Processed	190522-036		Unknown		1035									SCN-Bimane	T1C1	Target Compound	12	6	2.22	2.2	0.02		M+	N/A	N/A	N/A	N/A	124.1	124.1	-.002 (mmu)	0.105	N/A	N/A	Method	True	False	N/A	N/A	N/A			Pass	Fail	N/A	N/A	N/A	Identified	N/A
36	Processed	190522-036		Unknown		1035									SCN-Bimane IS	T1	Internal Standard	638	1203	2.24	2.22	-0.02		M+	1	1	1	N/A	111	111	.000 (mmu)	N/A	N/A	N/A	Method	True	False	N/A	N/A	N/A			Pass	Pass	N/A	N/A	N/A	Confirmed	N/A
36	Processed	190522-036		Unknown		1035									SCN-Bimane IS	T1C1	Internal Standard	201	644	2.22	2.22	0.00		M+	N/A	N/A	N/A	N/A	126.1	126.1	-.002 (mmu)	N/A	N/A	N/A	Method	True	False	N/A	N/A	N/A			Pass	Pass	N/A	N/A	N/A	Confirmed	N/A
37	Processed	190522-037		Unknown		1036									SCN-Bimane	T1	Target Compound	457	1107	2.23	2.24	0.01		M+	11.804	N/A	11.804	N/A	111	111	.000 (mmu)	0.529	1	2093	Method	True	False	N/A	N/A	N/A			Pass	Pass	N/A	N/A	N/A	Confirmed	N/A
37	Processed	190522-037		Unknown		1036									SCN-Bimane	T1C1	Target Compound	245	528	2.24	2.23	0.01		M+	N/A	N/A	N/A	N/A	124.1	124.1	-.002 (mmu)	0.529	N/A	N/A	Method	True	False	N/A	N/A	N/A			Pass	Pass	N/A	N/A	N/A	Confirmed	N/A
37	Processed	190522-037		Unknown		1036									SCN-Bimane IS	T1	Internal Standard	919	2093	2.24	2.24	0.00		M+	1	1	1	N/A	111	111	.000 (mmu)	N/A	N/A	N/A	Method	True	False	N/A	N/A	N/A			Pass	Pass	N/A	N/A	N/A	Confirmed	N/A
37	Processed	190522-037		Unknown		1036									SCN-Bimane IS	T1C1	Internal Standard	463	1445	2.24	2.22	0.02		M+	N/A	N/A	N/A	N/A	126.1	126.1	-.002 (mmu)	N/A	N/A	N/A	Method	True	False	N/A	N/A	N/A			Pass	Pass	N/A	N/A	N/A	Confirmed	N/A
38	Processed	190522-038		Unknown		1037									SCN-Bimane	T1	Target Compound	458	1089	2.23	2.24	0.01		M+	11.655	N/A	11.655	N/A	111	111	.000 (mmu)	0.522	1	2084	Method	True	False	N/A	N/A	N/A			Pass	Fail	N/A	N/A	N/A	Identified	N/A
38	Processed	190522-038		Unknown		1037									SCN-Bimane	T1C1	Target Compound	336	661	2.24	2.23	0.01		M+	N/A	N/A	N/A	N/A	124.1	124.1	-.002 (mmu)	0.522	N/A	N/A	Method	True	False	N/A	N/A	N/A			Pass	Fail	N/A	N/A	N/A	Identified	N/A
38	Processed	190522-038		Unknown		1037									SCN-Bimane IS	T1	Internal Standard	850	2084	2.24	2.23	-0.01		M+	1	1	1	N/A	111	111	.000 (mmu)	N/A	N/A	N/A	Method	True	False	N/A	N/A	N/A			Pass	Pass	N/A	N/A	N/A	Confirmed	N/A
38	Processed	190522-038		Unknown		1037									SCN-Bimane IS	T1C1	Internal Standard	457	1335	2.23	2.23	0.00		M+	N/A	N/A	N/A	N/A	126.1	126.1	-.002 (mmu)	N/A	N/A	N/A	Method	True	False	N/A	N/A	N/A			Pass	Pass	N/A	N/A	N/A	Confirmed	N/A
39	Processed	190522-039		Unknown		1038									SCN-Bimane	T1	Target Compound	1123	2786	2.23	2.23	0.00		M+	27.548	N/A	27.548	N/A	111	111	.000 (mmu)	1.223	1	2278	Method	True	False	N/A	N/A	N/A			Pass	Pass	N/A	N/A	N/A	Confirmed	N/A
39	Processed	190522-039		Unknown		1038									SCN-Bimane	T1C1	Target Compound	629	1385	2.23	2.24	-0.01		M+	N/A	N/A	N/A	N/A	124.1	124.1	-.002 (mmu)	1.223	N/A	N/A	Method	True	False	N/A	N/A	N/A			Pass	Pass	N/A	N/A	N/A	Confirmed	N/A
39	Processed	190522-039		Unknown		1038									SCN-Bimane IS	T1	Internal Standard	1025	2278	2.24	2.23	-0.01		M+	1	1	1	N/A	111	111	.000 (mmu)	N/A	N/A	N/A	Method	True	False	N/A	N/A	N/A			Pass	Pass	N/A	N/A	N/A	Confirmed	N/A
39	Processed	190522-039		Unknown		1038									SCN-Bimane IS	T1C1	Internal Standard	472	1377	2.23	2.24	-0.01		M+	N/A	N/A	N/A	N/A	126.1	126.1	-.002 (mmu)	N/A	N/A	N/A	Method	True	False	N/A	N/A	N/A			Pass	Pass	N/A	N/A	N/A	Confirmed	N/A
40	Processed	190522-040		Unknown		1039									SCN-Bimane	T1	Target Compound	467	964	2.23	2.24	0.01		M+	28.402	N/A	28.402	N/A	111	111	.000 (mmu)	1.26	1	765	Method	True	False	N/A	N/A	N/A			Pass	Pass	N/A	N/A	N/A	Confirmed	N/A
40	Processed	190522-040		Unknown		1039									SCN-Bimane	T1C1	Target Compound	310	556	2.24	2.22	0.01		M+	N/A	N/A	N/A	N/A	124.1	124.1	-.002 (mmu)	1.26	N/A	N/A	Method	True	False	N/A	N/A	N/A			Pass	Pass	N/A	N/A	N/A	Confirmed	N/A
40	Processed	190522-040		Unknown		1039									SCN-Bimane IS	T1	Internal Standard	450	765	2.24	2.24	0.00		M+	1	1	1	N/A	111	111	.000 (mmu)	N/A	N/A	N/A	Method	True	False	N/A	N/A	N/A			Pass	Fail	N/A	N/A	N/A	Identified	N/A
40	Processed	190522-040		Unknown		1039									SCN-Bimane IS	T1C1	Internal Standard	267	712	2.24	2.23	0.01		M+	N/A	N/A	N/A	N/A	126.1	126.1	-.002 (mmu)	N/A	N/A	N/A	Method	True	False	N/A	N/A	N/A			Pass	Fail	N/A	N/A	N/A	Identified	N/A
41	Processed	190522-041		Unknown		1040									SCN-Bimane	T1	Target Compound	1349	3283	2.23	2.23	0.00		M+	37.942	N/A	37.942	N/A	111	111	.000 (mmu)	1.681	1	1954	Method	True	False	N/A	N/A	N/A			Pass	Pass	N/A	N/A	N/A	Confirmed	N/A
41	Processed	190522-041		Unknown		1040									SCN-Bimane	T1C1	Target Compound	674	1614	2.23	2.24	-0.01		M+	N/A	N/A	N/A	N/A	124.1	124.1	-.002 (mmu)	1.681	N/A	N/A	Method	True	False	N/A	N/A	N/A			Pass	Pass	N/A	N/A	N/A	Confirmed	N/A
41	Processed	190522-041		Unknown		1040									SCN-Bimane IS	T1	Internal Standard	802	1954	2.24	2.23	-0.01		M+	1	1	1	N/A	111	111	.000 (mmu)	N/A	N/A	N/A	Method	True	False	N/A	N/A	N/A			Pass	Pass	N/A	N/A	N/A	Confirmed	N/A
41	Processed	190522-041		Unknown		1040									SCN-Bimane IS	T1C1	Internal Standard	560	1476	2.23	2.24	-0.01		M+	N/A	N/A	N/A	N/A	126.1	126.1	-.002 (mmu)	N/A	N/A	N/A	Method	True	False	N/A	N/A	N/A			Pass	Pass	N/A	N/A	N/A	Confirmed	N/A
42	Processed	190522-042		Unknown		1041									SCN-Bimane	T1	Target Compound	1904	4051	2.23	2.24	0.01		M+	51.216	N/A	51.216	N/A	111	111	.000 (mmu)	2.266	1	1788	Method	True	False	N/A	N/A	N/A			Pass	Pass	N/A	N/A	N/A	Confirmed	N/A
42	Processed	190522-042		Unknown		1041									SCN-Bimane	T1C1	Target Compound	913	1906	2.24	2.23	0.01		M+	N/A	N/A	N/A	N/A	124.1	124.1	-.002 (mmu)	2.266	N/A	N/A	Method	True	False	N/A	N/A	N/A			Pass	Pass	N/A	N/A	N/A	Confirmed	N/A
42	Processed	190522-042		Unknown		1041									SCN-Bimane IS	T1	Internal Standard	752	1788	2.24	2.24	0.00		M+	1	1	1	N/A	111	111	.000 (mmu)	N/A	N/A	N/A	Method	True	False	N/A	N/A	N/A			Pass	Pass	N/A	N/A	N/A	Confirmed	N/A
42	Processed	190522-042		Unknown		1041									SCN-Bimane IS	T1C1	Internal Standard	504	1294	2.24	2.23	0.01		M+	N/A	N/A	N/A	N/A	126.1	126.1	-.002 (mmu)	N/A	N/A	N/A	Method	True	False	N/A	N/A	N/A			Pass	Pass	N/A	N/A	N/A	Confirmed	N/A
43	Processed	190522-043		Unknown		1042									SCN-Bimane	T1	Target Compound	37	30	2.23	2.24	0.01		M+	0.232	N/A	0.232	N/A	111	111	.000 (mmu)	0.019	1	1586	Method	True	False	N/A	N/A	N/A			Pass	Fail	N/A	N/A	N/A	Identified	N/A
43	Processed	190522-043		Unknown		1042									SCN-Bimane	T1C1	Target Compound	23	11	2.24	2.24	-0.01		M+	N/A	N/A	N/A	N/A	124.1	124.1	-.002 (mmu)	0.019	N/A	N/A	Method	True	False	N/A	N/A	N/A			Pass	Fail	N/A	N/A	N/A	Identified	N/A
43	Processed	190522-043		Unknown		1042									SCN-Bimane IS	T1	Internal Standard	687	1586	2.24	2.23	-0.01		M+	1	1	1	N/A	111	111	.000 (mmu)	N/A	N/A	N/A	Method	True	False	N/A	N/A	N/A			Pass	Pass	N/A	N/A	N/A	Confirmed	N/A
43	Processed	190522-043		Unknown		1042									SCN-Bimane IS	T1C1	Internal Standard	273	958	2.23	2.25	-0.02		M+	N/A	N/A	N/A	N/A	126.1	126.1	-.002 (mmu)	N/A	N/A	N/A	Method	True	False	N/A	N/A	N/A			Pass	Pass	N/A	N/A	N/A	Confirmed	N/A
44	Processed	190522-044		Unknown		1043									SCN-Bimane	T1	Target Compound	16	12	2.23	2.22	-0.01		M+	-0.085	N/A	-0.085	N/A	111	111	.000 (mmu)	0.005	1	2443	Method	True	False	N/A	N/A	N/A			Pass	Fail	N/A	N/A	N/A	Identified	N/A
44	Processed	190522-044		Unknown		1043									SCN-Bimane	T1C1	Target Compound	13	8	2.22	2.23	0.00		M+	N/A	N/A	N/A	N/A	124.1	124.1	-.002 (mmu)	0.005	N/A	N/A	Method	True	False	N/A	N/A	N/A			Pass	Fail	N/A	N/A	N/A	Identified	N/A
44	Processed	190522-044		Unknown		1043									SCN-Bimane IS	T1	Internal Standard	1041	2443	2.24	2.23	-0.01		M+	1	1	1	N/A	111	111	.000 (mmu)	N/A	N/A	N/A	Method	True	False	N/A	N/A	N/A			Pass	Pass	N/A	N/A	N/A	Confirmed	N/A
44	Processed	190522-044		Unknown		1043									SCN-Bimane IS	T1C1	Internal Standard	416	1376	2.23	2.24	0.00		M+	N/A	N/A	N/A	N/A	126.1	126.1	-.002 (mmu)	N/A	N/A	N/A	Method	True	False	N/A	N/A	N/A			Pass	Pass	N/A	N/A	N/A	Confirmed	N/A
45	Processed	190522-045		Unknown		1044									SCN-Bimane	T1	Target Compound	7	3	2.23	2.24	0.01		M+	-0.168	N/A	-0.168	N/A	111	111	.000 (mmu)	0.001	1	2295	Method	True	False	N/A	N/A	N/A			Pass	Fail	N/A	N/A	N/A	Identified	N/A
45	Processed	190522-045		Unknown		1044									SCN-Bimane	T1C1	Target Compound	0	0	2.24	2.23	0.01		M+	N/A	N/A	N/A	N/A	124.1	124.1	-.002 (mmu)	0.001	N/A	N/A	Method	True	False	N/A	N/A	N/A			Pass	Fail	N/A	N/A	N/A	Identified	N/A
45	Processed	190522-045		Unknown		1044									SCN-Bimane IS	T1	Internal Standard	1116	2295	2.24	2.23	-0.01		M+	1	1	1	N/A	111	111	.000 (mmu)	N/A	N/A	N/A	Method	True	False	N/A	N/A	N/A			Pass	Pass	N/A	N/A	N/A	Confirmed	N/A
45	Processed	190522-045		Unknown		1044									SCN-Bimane IS	T1C1	Internal Standard	505	1486	2.23	2.23	0.00		M+	N/A	N/A	N/A	N/A	126.1	126.1	-.002 (mmu)	N/A	N/A	N/A	Method	True	False	N/A	N/A	N/A			Pass	Pass	N/A	N/A	N/A	Confirmed	N/A
46	Processed	190522-046		Unknown		1045									SCN-Bimane	T1	Target Compound	34	33	2.23	2.22	-0.01		M+	0.118	N/A	0.118	N/A	111	111	.000 (mmu)	0.014	1	2326	Method	True	False	N/A	N/A	N/A			Pass	Fail	N/A	N/A	N/A	Identified	N/A
46	Processed	190522-046		Unknown		1045									SCN-Bimane	T1C1	Target Compound	N/F	N/F	2.22	N/A	N/A		M+	N/A	N/A	N/A	N/A	124.1	N/F	N/A	0.014	N/A	N/A	Method	True	False	N/A	N/A	N/A			Fail	Fail	N/A	N/A	N/A	NotFound	N/A
46	Processed	190522-046		Unknown		1045									SCN-Bimane IS	T1	Internal Standard	806	2326	2.24	2.23	-0.01		M+	1	1	1	N/A	111	111	.000 (mmu)	N/A	N/A	N/A	Method	True	False	N/A	N/A	N/A			Pass	Pass	N/A	N/A	N/A	Confirmed	N/A
46	Processed	190522-046		Unknown		1045									SCN-Bimane IS	T1C1	Internal Standard	478	1456	2.23	2.23	0.00		M+	N/A	N/A	N/A	N/A	126.1	126.1	-.002 (mmu)	N/A	N/A	N/A	Method	True	False	N/A	N/A	N/A			Pass	Pass	N/A	N/A	N/A	Confirmed	N/A
47	Processed	190522-047		Unknown		1046									SCN-Bimane	T1	Target Compound	1221	2642	2.23	2.24	0.01		M+	33.316	N/A	33.316	N/A	111	111	.000 (mmu)	1.477	1	1789	Method	True	False	N/A	N/A	N/A			Pass	Pass	N/A	N/A	N/A	Confirmed	N/A
47	Processed	190522-047		Unknown		1046									SCN-Bimane	T1C1	Target Compound	625	1528	2.24	2.22	0.01		M+	N/A	N/A	N/A	N/A	124.1	124.1	-.002 (mmu)	1.477	N/A	N/A	Method	True	False	N/A	N/A	N/A			Pass	Pass	N/A	N/A	N/A	Confirmed	N/A
47	Processed	190522-047		Unknown		1046									SCN-Bimane IS	T1	Internal Standard	630	1789	2.24	2.24	0.00		M+	1	1	1	N/A	111	111	.000 (mmu)	N/A	N/A	N/A	Method	True	False	N/A	N/A	N/A			Pass	Pass	N/A	N/A	N/A	Confirmed	N/A
47	Processed	190522-047		Unknown		1046									SCN-Bimane IS	T1C1	Internal Standard	497	1202	2.24	2.23	0.01		M+	N/A	N/A	N/A	N/A	126.1	126.1	-.002 (mmu)	N/A	N/A	N/A	Method	True	False	N/A	N/A	N/A			Pass	Pass	N/A	N/A	N/A	Confirmed	N/A
48	Processed	190522-048		Unknown		1047									SCN-Bimane	T1	Target Compound	1262	3064	2.23	2.24	0.01		M+	38.076	N/A	38.076	N/A	111	111	.000 (mmu)	1.687	1	1817	Method	True	False	N/A	N/A	N/A			Pass	Pass	N/A	N/A	N/A	Confirmed	N/A
48	Processed	190522-048		Unknown		1047									SCN-Bimane	T1C1	Target Compound	558	1313	2.24	2.24	0.00		M+	N/A	N/A	N/A	N/A	124.1	124.1	-.002 (mmu)	1.687	N/A	N/A	Method	True	False	N/A	N/A	N/A			Pass	Pass	N/A	N/A	N/A	Confirmed	N/A
48	Processed	190522-048		Unknown		1047									SCN-Bimane IS	T1	Internal Standard	728	1817	2.24	2.24	0.00		M+	1	1	1	N/A	111	111	.000 (mmu)	N/A	N/A	N/A	Method	True	False	N/A	N/A	N/A			Pass	Pass	N/A	N/A	N/A	Confirmed	N/A
48	Processed	190522-048		Unknown		1047									SCN-Bimane IS	T1C1	Internal Standard	323	1011	2.24	2.24	0.00		M+	N/A	N/A	N/A	N/A	126.1	126.1	-.002 (mmu)	N/A	N/A	N/A	Method	True	False	N/A	N/A	N/A			Pass	Pass	N/A	N/A	N/A	Confirmed	N/A
49	Processed	190522-049		Unknown		1048									SCN-Bimane	T1	Target Compound	16	6	2.23	2.23	0.00		M+	-0.102	N/A	-0.102	N/A	111	111	.000 (mmu)	0.004	1	1464	Method	True	False	N/A	N/A	N/A			Pass	Fail	N/A	N/A	N/A	Identified	N/A
49	Processed	190522-049		Unknown		1048									SCN-Bimane	T1C1	Target Compound	26	31	2.23	2.24	-0.01		M+	N/A	N/A	N/A	N/A	124.1	124.1	-.002 (mmu)	0.004	N/A	N/A	Method	True	False	N/A	N/A	N/A			Pass	Fail	N/A	N/A	N/A	Identified	N/A
49	Processed	190522-049		Unknown		1048									SCN-Bimane IS	T1	Internal Standard	540	1464	2.24	2.24	0.00		M+	1	1	1	N/A	111	111	.000 (mmu)	N/A	N/A	N/A	Method	True	False	N/A	N/A	N/A			Pass	Pass	N/A	N/A	N/A	Confirmed	N/A
49	Processed	190522-049		Unknown		1048									SCN-Bimane IS	T1C1	Internal Standard	296	1041	2.24	2.24	0.00		M+	N/A	N/A	N/A	N/A	126.1	126.1	-.002 (mmu)	N/A	N/A	N/A	Method	True	False	N/A	N/A	N/A			Pass	Pass	N/A	N/A	N/A	Confirmed	N/A
50	Processed	190522-050		Unknown		1049									SCN-Bimane	T1	Target Compound	15	8	2.23	2.25	0.02		M+	-0.057	N/A	-0.057	N/A	111	111	.000 (mmu)	0.006	1	1262	Method	True	False	N/A	N/A	N/A			Pass	Fail	N/A	N/A	N/A	Identified	N/A
50	Processed	190522-050		Unknown		1049									SCN-Bimane	T1C1	Target Compound	5	2	2.25	2.24	0.01		M+	N/A	N/A	N/A	N/A	124.1	124.1	-.002 (mmu)	0.006	N/A	N/A	Method	True	False	N/A	N/A	N/A			Pass	Fail	N/A	N/A	N/A	Identified	N/A
50	Processed	190522-050		Unknown		1049									SCN-Bimane IS	T1	Internal Standard	483	1262	2.24	2.23	-0.01		M+	1	1	1	N/A	111	111	.000 (mmu)	N/A	N/A	N/A	Method	True	False	N/A	N/A	N/A			Pass	Pass	N/A	N/A	N/A	Confirmed	N/A
50	Processed	190522-050		Unknown		1049									SCN-Bimane IS	T1C1	Internal Standard	292	971	2.23	2.23	0.00		M+	N/A	N/A	N/A	N/A	126.1	126.1	-.002 (mmu)	N/A	N/A	N/A	Method	True	False	N/A	N/A	N/A			Pass	Pass	N/A	N/A	N/A	Confirmed	N/A
51	Processed	190522-051		Unknown		1050									SCN-Bimane	T1	Target Compound	268	516	2.23	2.24	0.01		M+	8.744	N/A	8.744	N/A	111	111	.000 (mmu)	0.394	1	1309	Method	True	False	N/A	N/A	N/A			Pass	Pass	N/A	N/A	N/A	Confirmed	N/A
51	Processed	190522-051		Unknown		1050									SCN-Bimane	T1C1	Target Compound	134	247	2.24	2.23	0.01		M+	N/A	N/A	N/A	N/A	124.1	124.1	-.002 (mmu)	0.394	N/A	N/A	Method	True	False	N/A	N/A	N/A			Pass	Pass	N/A	N/A	N/A	Confirmed	N/A
51	Processed	190522-051		Unknown		1050									SCN-Bimane IS	T1	Internal Standard	647	1309	2.24	2.23	-0.01		M+	1	1	1	N/A	111	111	.000 (mmu)	N/A	N/A	N/A	Method	True	False	N/A	N/A	N/A			Pass	Fail	N/A	N/A	N/A	Identified	N/A
51	Processed	190522-051		Unknown		1050									SCN-Bimane IS	T1C1	Internal Standard	377	1057	2.23	2.23	0.00		M+	N/A	N/A	N/A	N/A	126.1	126.1	-.002 (mmu)	N/A	N/A	N/A	Method	True	False	N/A	N/A	N/A			Pass	Fail	N/A	N/A	N/A	Identified	N/A
52	Processed	190522-052		Unknown		1051									SCN-Bimane	T1	Target Compound	289	496	2.23	2.22	-0.01		M+	7.161	N/A	7.161	N/A	111	111	.000 (mmu)	0.324	1	1528	Method	True	False	N/A	N/A	N/A			Pass	Fail	N/A	N/A	N/A	Identified	N/A
52	Processed	190522-052		Unknown		1051									SCN-Bimane	T1C1	Target Compound	99	181	2.22	2.23	-0.01		M+	N/A	N/A	N/A	N/A	124.1	124.1	-.002 (mmu)	0.324	N/A	N/A	Method	True	False	N/A	N/A	N/A			Pass	Fail	N/A	N/A	N/A	Identified	N/A
52	Processed	190522-052		Unknown		1051									SCN-Bimane IS	T1	Internal Standard	567	1528	2.24	2.24	0.00		M+	1	1	1	N/A	111	111	.000 (mmu)	N/A	N/A	N/A	Method	True	False	N/A	N/A	N/A			Pass	Pass	N/A	N/A	N/A	Confirmed	N/A
52	Processed	190522-052		Unknown		1051									SCN-Bimane IS	T1C1	Internal Standard	315	957	2.24	2.24	0.00		M+	N/A	N/A	N/A	N/A	126.1	126.1	-.002 (mmu)	N/A	N/A	N/A	Method	True	False	N/A	N/A	N/A			Pass	Pass	N/A	N/A	N/A	Confirmed	N/A
53	Processed	190522-053		Unknown		1052									SCN-Bimane	T1	Target Compound	1525	4215	2.23	2.23	0.00		M+	59.254	N/A	59.254	N/A	111	111	.000 (mmu)	2.62	1	1609	Method	True	False	N/A	N/A	N/A			Pass	Pass	N/A	N/A	N/A	Confirmed	N/A
53	Processed	190522-053		Unknown		1052									SCN-Bimane	T1C1	Target Compound	736	1705	2.23	2.24	-0.01		M+	N/A	N/A	N/A	N/A	124.1	124.1	-.002 (mmu)	2.62	N/A	N/A	Method	True	False	N/A	N/A	N/A			Pass	Pass	N/A	N/A	N/A	Confirmed	N/A
53	Processed	190522-053		Unknown		1052									SCN-Bimane IS	T1	Internal Standard	643	1609	2.24	2.24	0.00		M+	1	1	1	N/A	111	111	.000 (mmu)	N/A	N/A	N/A	Method	True	False	N/A	N/A	N/A			Pass	Pass	N/A	N/A	N/A	Confirmed	N/A
53	Processed	190522-053		Unknown		1052									SCN-Bimane IS	T1C1	Internal Standard	502	1220	2.24	2.23	0.00		M+	N/A	N/A	N/A	N/A	126.1	126.1	-.002 (mmu)	N/A	N/A	N/A	Method	True	False	N/A	N/A	N/A			Pass	Pass	N/A	N/A	N/A	Confirmed	N/A
54	Processed	190522-054		Unknown		1053									SCN-Bimane	T1	Target Compound	2114	5186	2.23	2.23	0.00		M+	67.8	N/A	67.8	N/A	111	111	.000 (mmu)	2.996	1	1731	Method	True	False	N/A	N/A	N/A			Pass	Pass	N/A	N/A	N/A	Confirmed	N/A
54	Processed	190522-054		Unknown		1053									SCN-Bimane	T1C1	Target Compound	1082	2412	2.23	2.23	0.00		M+	N/A	N/A	N/A	N/A	124.1	124.1	-.002 (mmu)	2.996	N/A	N/A	Method	True	False	N/A	N/A	N/A			Pass	Pass	N/A	N/A	N/A	Confirmed	N/A
54	Processed	190522-054		Unknown		1053									SCN-Bimane IS	T1	Internal Standard	826	1731	2.24	2.23	-0.01		M+	1	1	1	N/A	111	111	.000 (mmu)	N/A	N/A	N/A	Method	True	False	N/A	N/A	N/A			Pass	Pass	N/A	N/A	N/A	Confirmed	N/A
54	Processed	190522-054		Unknown		1053									SCN-Bimane IS	T1C1	Internal Standard	363	1209	2.23	2.24	-0.01		M+	N/A	N/A	N/A	N/A	126.1	126.1	-.002 (mmu)	N/A	N/A	N/A	Method	True	False	N/A	N/A	N/A			Pass	Pass	N/A	N/A	N/A	Confirmed	N/A
55	Processed	190522-055		Unknown		1054									SCN-Bimane	T1	Target Compound	685	1862	2.23	2.23	0.00		M+	22.727	N/A	22.727	N/A	111	111	.000 (mmu)	1.01	1	1843	Method	True	False	N/A	N/A	N/A			Pass	Pass	N/A	N/A	N/A	Confirmed	N/A
55	Processed	190522-055		Unknown		1054									SCN-Bimane	T1C1	Target Compound	356	874	2.23	2.23	0.00		M+	N/A	N/A	N/A	N/A	124.1	124.1	-.002 (mmu)	1.01	N/A	N/A	Method	True	False	N/A	N/A	N/A			Pass	Pass	N/A	N/A	N/A	Confirmed	N/A
55	Processed	190522-055		Unknown		1054									SCN-Bimane IS	T1	Internal Standard	774	1843	2.24	2.24	0.00		M+	1	1	1	N/A	111	111	.000 (mmu)	N/A	N/A	N/A	Method	True	False	N/A	N/A	N/A			Pass	Pass	N/A	N/A	N/A	Confirmed	N/A
55	Processed	190522-055		Unknown		1054									SCN-Bimane IS	T1C1	Internal Standard	662	1351	2.24	2.24	0.00		M+	N/A	N/A	N/A	N/A	126.1	126.1	-.002 (mmu)	N/A	N/A	N/A	Method	True	False	N/A	N/A	N/A			Pass	Pass	N/A	N/A	N/A	Confirmed	N/A
56	Processed	190522-056		Unknown		1055									SCN-Bimane	T1	Target Compound	795	1926	2.23	2.24	0.01		M+	21.452	N/A	21.452	N/A	111	111	.000 (mmu)	0.954	1	2019	Method	True	False	N/A	N/A	N/A			Pass	Pass	N/A	N/A	N/A	Confirmed	N/A
56	Processed	190522-056		Unknown		1055									SCN-Bimane	T1C1	Target Compound	327	1028	2.24	2.23	0.01		M+	N/A	N/A	N/A	N/A	124.1	124.1	-.002 (mmu)	0.954	N/A	N/A	Method	True	False	N/A	N/A	N/A			Pass	Pass	N/A	N/A	N/A	Confirmed	N/A
56	Processed	190522-056		Unknown		1055									SCN-Bimane IS	T1	Internal Standard	780	2019	2.24	2.24	0.00		M+	1	1	1	N/A	111	111	.000 (mmu)	N/A	N/A	N/A	Method	True	False	N/A	N/A	N/A			Pass	Pass	N/A	N/A	N/A	Confirmed	N/A
56	Processed	190522-056		Unknown		1055									SCN-Bimane IS	T1C1	Internal Standard	371	1342	2.24	2.23	0.01		M+	N/A	N/A	N/A	N/A	126.1	126.1	-.002 (mmu)	N/A	N/A	N/A	Method	True	False	N/A	N/A	N/A			Pass	Pass	N/A	N/A	N/A	Confirmed	N/A
57	Processed	190522-057		Unknown		1056									SCN-Bimane	T1	Target Compound	62	62	2.23	2.23	0.00		M+	0.54	N/A	0.54	N/A	111	111	.000 (mmu)	0.033	1	1900	Method	True	False	N/A	N/A	N/A			Pass	Pass	N/A	N/A	N/A	Confirmed	N/A
57	Processed	190522-057		Unknown		1056									SCN-Bimane	T1C1	Target Compound	24	34	2.23	2.24	0.00		M+	N/A	N/A	N/A	N/A	124.1	124.1	-.002 (mmu)	0.033	N/A	N/A	Method	True	False	N/A	N/A	N/A			Pass	Pass	N/A	N/A	N/A	Confirmed	N/A
57	Processed	190522-057		Unknown		1056									SCN-Bimane IS	T1	Internal Standard	806	1900	2.24	2.23	-0.01		M+	1	1	1	N/A	111	111	.000 (mmu)	N/A	N/A	N/A	Method	True	False	N/A	N/A	N/A			Pass	Pass	N/A	N/A	N/A	Confirmed	N/A
57	Processed	190522-057		Unknown		1056									SCN-Bimane IS	T1C1	Internal Standard	465	1216	2.23	2.23	0.00		M+	N/A	N/A	N/A	N/A	126.1	126.1	-.002 (mmu)	N/A	N/A	N/A	Method	True	False	N/A	N/A	N/A			Pass	Pass	N/A	N/A	N/A	Confirmed	N/A
58	Processed	190522-058		Unknown		1057									SCN-Bimane	T1	Target Compound	63	91	2.23	2.23	0.00		M+	0.858	N/A	0.858	N/A	111	111	.000 (mmu)	0.047	1	1954	Method	True	False	N/A	N/A	N/A			Pass	Fail	N/A	N/A	N/A	Identified	N/A
58	Processed	190522-058		Unknown		1057									SCN-Bimane	T1C1	Target Compound	38	32	2.23	2.23	-0.01		M+	N/A	N/A	N/A	N/A	124.1	124.1	-.002 (mmu)	0.047	N/A	N/A	Method	True	False	N/A	N/A	N/A			Pass	Fail	N/A	N/A	N/A	Identified	N/A
58	Processed	190522-058		Unknown		1057									SCN-Bimane IS	T1	Internal Standard	822	1954	2.24	2.24	0.00		M+	1	1	1	N/A	111	111	.000 (mmu)	N/A	N/A	N/A	Method	True	False	N/A	N/A	N/A			Pass	Pass	N/A	N/A	N/A	Confirmed	N/A
58	Processed	190522-058		Unknown		1057									SCN-Bimane IS	T1C1	Internal Standard	430	1323	2.24	2.23	0.01		M+	N/A	N/A	N/A	N/A	126.1	126.1	-.002 (mmu)	N/A	N/A	N/A	Method	True	False	N/A	N/A	N/A			Pass	Pass	N/A	N/A	N/A	Confirmed	N/A
59	Processed	190522-059		Unknown		1058									SCN-Bimane	T1	Target Compound	4	3	2.23	2.18	-0.05		M+	-0.167	N/A	-0.167	N/A	111	111	.000 (mmu)	0.001	1	1756	Method	True	False	N/A	N/A	N/A			Pass	Fail	N/A	N/A	N/A	Identified	N/A
59	Processed	190522-059		Unknown		1058									SCN-Bimane	T1C1	Target Compound	5	2	2.18	2.17	0.00		M+	N/A	N/A	N/A	N/A	124.1	124.1	-.002 (mmu)	0.001	N/A	N/A	Method	True	False	N/A	N/A	N/A			Pass	Fail	N/A	N/A	N/A	Identified	N/A
59	Processed	190522-059		Unknown		1058									SCN-Bimane IS	T1	Internal Standard	720	1756	2.24	2.23	-0.01		M+	1	1	1	N/A	111	111	.000 (mmu)	N/A	N/A	N/A	Method	True	False	N/A	N/A	N/A			Pass	Pass	N/A	N/A	N/A	Confirmed	N/A
59	Processed	190522-059		Unknown		1058									SCN-Bimane IS	T1C1	Internal Standard	448	1273	2.23	2.23	0.00		M+	N/A	N/A	N/A	N/A	126.1	126.1	-.002 (mmu)	N/A	N/A	N/A	Method	True	False	N/A	N/A	N/A			Pass	Pass	N/A	N/A	N/A	Confirmed	N/A
60	Processed	190522-060		Unknown		1059									SCN-Bimane	T1	Target Compound	12	5	2.23	2.23	0.00		M+	-0.15	N/A	-0.15	N/A	111	111	.000 (mmu)	0.002	1	2305	Method	True	False	N/A	N/A	N/A			Pass	Fail	N/A	N/A	N/A	Identified	N/A
60	Processed	190522-060		Unknown		1059									SCN-Bimane	T1C1	Target Compound	44	46	2.23	2.24	0.00		M+	N/A	N/A	N/A	N/A	124.1	124.1	-.002 (mmu)	0.002	N/A	N/A	Method	True	False	N/A	N/A	N/A			Pass	Fail	N/A	N/A	N/A	Identified	N/A
60	Processed	190522-060		Unknown		1059									SCN-Bimane IS	T1	Internal Standard	879	2305	2.24	2.24	0.00		M+	1	1	1	N/A	111	111	.000 (mmu)	N/A	N/A	N/A	Method	True	False	N/A	N/A	N/A			Pass	Pass	N/A	N/A	N/A	Confirmed	N/A
60	Processed	190522-060		Unknown		1059									SCN-Bimane IS	T1C1	Internal Standard	607	1749	2.24	2.24	0.00		M+	N/A	N/A	N/A	N/A	126.1	126.1	-.002 (mmu)	N/A	N/A	N/A	Method	True	False	N/A	N/A	N/A			Pass	Pass	N/A	N/A	N/A	Confirmed	N/A
61	Processed	190522-061		Unknown		1060									SCN-Bimane	T1	Target Compound	1452	3508	2.23	2.23	0.00		M+	37.673	N/A	37.673	N/A	111	111	.000 (mmu)	1.669	1	2102	Method	True	False	N/A	N/A	N/A			Pass	Pass	N/A	N/A	N/A	Confirmed	N/A
61	Processed	190522-061		Unknown		1060									SCN-Bimane	T1C1	Target Compound	808	1937	2.23	2.23	0.00		M+	N/A	N/A	N/A	N/A	124.1	124.1	-.002 (mmu)	1.669	N/A	N/A	Method	True	False	N/A	N/A	N/A			Pass	Pass	N/A	N/A	N/A	Confirmed	N/A
61	Processed	190522-061		Unknown		1060									SCN-Bimane IS	T1	Internal Standard	797	2102	2.24	2.23	-0.01		M+	1	1	1	N/A	111	111	.000 (mmu)	N/A	N/A	N/A	Method	True	False	N/A	N/A	N/A			Pass	Pass	N/A	N/A	N/A	Confirmed	N/A
61	Processed	190522-061		Unknown		1060									SCN-Bimane IS	T1C1	Internal Standard	386	1258	2.23	2.24	-0.01		M+	N/A	N/A	N/A	N/A	126.1	126.1	-.002 (mmu)	N/A	N/A	N/A	Method	True	False	N/A	N/A	N/A			Pass	Pass	N/A	N/A	N/A	Confirmed	N/A
62	Processed	190522-062		Unknown		1061									SCN-Bimane	T1	Target Compound	1771	4080	2.23	2.23	0.00		M+	49.028	N/A	49.028	N/A	111	111	.000 (mmu)	2.169	1	1881	Method	True	False	N/A	N/A	N/A			Pass	Pass	N/A	N/A	N/A	Confirmed	N/A
62	Processed	190522-062		Unknown		1061									SCN-Bimane	T1C1	Target Compound	797	1676	2.23	2.24	-0.01		M+	N/A	N/A	N/A	N/A	124.1	124.1	-.002 (mmu)	2.169	N/A	N/A	Method	True	False	N/A	N/A	N/A			Pass	Pass	N/A	N/A	N/A	Confirmed	N/A
62	Processed	190522-062		Unknown		1061									SCN-Bimane IS	T1	Internal Standard	836	1881	2.24	2.24	0.00		M+	1	1	1	N/A	111	111	.000 (mmu)	N/A	N/A	N/A	Method	True	False	N/A	N/A	N/A			Pass	Fail	N/A	N/A	N/A	Identified	N/A
62	Processed	190522-062		Unknown		1061									SCN-Bimane IS	T1C1	Internal Standard	421	934	2.24	2.23	0.00		M+	N/A	N/A	N/A	N/A	126.1	126.1	-.002 (mmu)	N/A	N/A	N/A	Method	True	False	N/A	N/A	N/A			Pass	Fail	N/A	N/A	N/A	Identified	N/A
63	Processed	190522-063		Unknown		1062									SCN-Bimane	T1	Target Compound	79	105	2.23	2.24	0.01		M+	1.234	N/A	1.234	N/A	111	111	.000 (mmu)	0.063	1	1669	Method	True	False	N/A	N/A	N/A			Pass	Pass	N/A	N/A	N/A	Confirmed	N/A
63	Processed	190522-063		Unknown		1062									SCN-Bimane	T1C1	Target Compound	54	58	2.24	2.23	0.01		M+	N/A	N/A	N/A	N/A	124.1	124.1	-.002 (mmu)	0.063	N/A	N/A	Method	True	False	N/A	N/A	N/A			Pass	Pass	N/A	N/A	N/A	Confirmed	N/A
63	Processed	190522-063		Unknown		1062									SCN-Bimane IS	T1	Internal Standard	788	1669	2.24	2.24	0.00		M+	1	1	1	N/A	111	111	.000 (mmu)	N/A	N/A	N/A	Method	True	False	N/A	N/A	N/A			Pass	Pass	N/A	N/A	N/A	Confirmed	N/A
63	Processed	190522-063		Unknown		1062									SCN-Bimane IS	T1C1	Internal Standard	330	1052	2.24	2.24	0.00		M+	N/A	N/A	N/A	N/A	126.1	126.1	-.002 (mmu)	N/A	N/A	N/A	Method	True	False	N/A	N/A	N/A			Pass	Pass	N/A	N/A	N/A	Confirmed	N/A
64	Processed	190522-064		Unknown		1063									SCN-Bimane	T1	Target Compound	23	20	2.23	2.21	-0.02		M+	0.06	N/A	0.06	N/A	111	111	.000 (mmu)	0.011	1	1720	Method	True	False	N/A	N/A	N/A			Pass	Fail	N/A	N/A	N/A	Identified	N/A
64	Processed	190522-064		Unknown		1063									SCN-Bimane	T1C1	Target Compound	17	13	2.21	2.23	-0.02		M+	N/A	N/A	N/A	N/A	124.1	124.1	-.002 (mmu)	0.011	N/A	N/A	Method	True	False	N/A	N/A	N/A			Pass	Fail	N/A	N/A	N/A	Identified	N/A
64	Processed	190522-064		Unknown		1063									SCN-Bimane IS	T1	Internal Standard	705	1720	2.24	2.23	-0.01		M+	1	1	1	N/A	111	111	.000 (mmu)	N/A	N/A	N/A	Method	True	False	N/A	N/A	N/A			Pass	Fail	N/A	N/A	N/A	Identified	N/A
64	Processed	190522-064		Unknown		1063									SCN-Bimane IS	T1C1	Internal Standard	335	826	2.23	2.23	0.00		M+	N/A	N/A	N/A	N/A	126.1	126.1	-.002 (mmu)	N/A	N/A	N/A	Method	True	False	N/A	N/A	N/A			Pass	Fail	N/A	N/A	N/A	Identified	N/A
65	Processed	190522-065		Unknown		1064									SCN-Bimane	T1	Target Compound	66	109	2.23	2.24	0.01		M+	1.299	N/A	1.299	N/A	111	111	.000 (mmu)	0.066	1	1655	Method	True	False	N/A	N/A	N/A			Pass	Fail	N/A	N/A	N/A	Identified	N/A
65	Processed	190522-065		Unknown		1064									SCN-Bimane	T1C1	Target Compound	36	27	2.24	2.22	0.02		M+	N/A	N/A	N/A	N/A	124.1	124.1	-.002 (mmu)	0.066	N/A	N/A	Method	True	False	N/A	N/A	N/A			Pass	Fail	N/A	N/A	N/A	Identified	N/A
65	Processed	190522-065		Unknown		1064									SCN-Bimane IS	T1	Internal Standard	665	1655	2.24	2.23	-0.01		M+	1	1	1	N/A	111	111	.000 (mmu)	N/A	N/A	N/A	Method	True	False	N/A	N/A	N/A			Pass	Pass	N/A	N/A	N/A	Confirmed	N/A
65	Processed	190522-065		Unknown		1064									SCN-Bimane IS	T1C1	Internal Standard	496	1190	2.23	2.24	-0.01		M+	N/A	N/A	N/A	N/A	126.1	126.1	-.002 (mmu)	N/A	N/A	N/A	Method	True	False	N/A	N/A	N/A			Pass	Pass	N/A	N/A	N/A	Confirmed	N/A
66	Processed	190522-066		Unknown		1065									SCN-Bimane	T1	Target Compound	41	85	2.23	2.25	0.02		M+	0.711	N/A	0.711	N/A	111	111	.000 (mmu)	0.04	1	2120	Method	True	False	N/A	N/A	N/A			Pass	Fail	N/A	N/A	N/A	Identified	N/A
66	Processed	190522-066		Unknown		1065									SCN-Bimane	T1C1	Target Compound	11	15	2.25	2.24	0.01		M+	N/A	N/A	N/A	N/A	124.1	124.1	-.002 (mmu)	0.04	N/A	N/A	Method	True	False	N/A	N/A	N/A			Pass	Fail	N/A	N/A	N/A	Identified	N/A
66	Processed	190522-066		Unknown		1065									SCN-Bimane IS	T1	Internal Standard	914	2120	2.24	2.24	0.00		M+	1	1	1	N/A	111	111	.000 (mmu)	N/A	N/A	N/A	Method	True	False	N/A	N/A	N/A			Pass	Pass	N/A	N/A	N/A	Confirmed	N/A
66	Processed	190522-066		Unknown		1065									SCN-Bimane IS	T1C1	Internal Standard	433	1399	2.24	2.23	0.01		M+	N/A	N/A	N/A	N/A	126.1	126.1	-.002 (mmu)	N/A	N/A	N/A	Method	True	False	N/A	N/A	N/A			Pass	Pass	N/A	N/A	N/A	Confirmed	N/A
67	Processed	190522-067		Unknown		1066									SCN-Bimane	T1	Target Compound	2364	6076	2.23	2.24	0.01		M+	64.543	N/A	64.543	N/A	111	111	.000 (mmu)	2.853	1	2130	Method	True	False	N/A	N/A	N/A			Pass	Pass	N/A	N/A	N/A	Confirmed	N/A
67	Processed	190522-067		Unknown		1066									SCN-Bimane	T1C1	Target Compound	1387	3106	2.24	2.23	0.01		M+	N/A	N/A	N/A	N/A	124.1	124.1	-.002 (mmu)	2.853	N/A	N/A	Method	True	False	N/A	N/A	N/A			Pass	Pass	N/A	N/A	N/A	Confirmed	N/A
67	Processed	190522-067		Unknown		1066									SCN-Bimane IS	T1	Internal Standard	876	2130	2.24	2.23	-0.01		M+	1	1	1	N/A	111	111	.000 (mmu)	N/A	N/A	N/A	Method	True	False	N/A	N/A	N/A			Pass	Pass	N/A	N/A	N/A	Confirmed	N/A
67	Processed	190522-067		Unknown		1066									SCN-Bimane IS	T1C1	Internal Standard	445	1619	2.23	2.22	0.01		M+	N/A	N/A	N/A	N/A	126.1	126.1	-.002 (mmu)	N/A	N/A	N/A	Method	True	False	N/A	N/A	N/A			Pass	Pass	N/A	N/A	N/A	Confirmed	N/A
68	Processed	190522-068		Unknown		1067									SCN-Bimane	T1	Target Compound	2610	5824	2.23	2.24	0.01		M+	61.135	N/A	61.135	N/A	111	111	.000 (mmu)	2.703	1	2155	Method	True	False	N/A	N/A	N/A			Pass	Pass	N/A	N/A	N/A	Confirmed	N/A
68	Processed	190522-068		Unknown		1067									SCN-Bimane	T1C1	Target Compound	1197	2914	2.24	2.23	0.01		M+	N/A	N/A	N/A	N/A	124.1	124.1	-.002 (mmu)	2.703	N/A	N/A	Method	True	False	N/A	N/A	N/A			Pass	Pass	N/A	N/A	N/A	Confirmed	N/A
68	Processed	190522-068		Unknown		1067									SCN-Bimane IS	T1	Internal Standard	840	2155	2.24	2.24	0.00		M+	1	1	1	N/A	111	111	.000 (mmu)	N/A	N/A	N/A	Method	True	False	N/A	N/A	N/A			Pass	Pass	N/A	N/A	N/A	Confirmed	N/A
68	Processed	190522-068		Unknown		1067									SCN-Bimane IS	T1C1	Internal Standard	596	1412	2.24	2.23	0.01		M+	N/A	N/A	N/A	N/A	126.1	126.1	-.002 (mmu)	N/A	N/A	N/A	Method	True	False	N/A	N/A	N/A			Pass	Pass	N/A	N/A	N/A	Confirmed	N/A
69	Processed	190522-069		Unknown		1068									SCN-Bimane	T1	Target Compound	594	1374	2.23	2.24	0.01		M+	13.085	N/A	13.085	N/A	111	111	.000 (mmu)	0.585	1	2347	Method	True	False	N/A	N/A	N/A			Pass	Pass	N/A	N/A	N/A	Confirmed	N/A
69	Processed	190522-069		Unknown		1068									SCN-Bimane	T1C1	Target Compound	201	567	2.24	2.24	0.00		M+	N/A	N/A	N/A	N/A	124.1	124.1	-.002 (mmu)	0.585	N/A	N/A	Method	True	False	N/A	N/A	N/A			Pass	Pass	N/A	N/A	N/A	Confirmed	N/A
69	Processed	190522-069		Unknown		1068									SCN-Bimane IS	T1	Internal Standard	1011	2347	2.24	2.23	-0.01		M+	1	1	1	N/A	111	111	.000 (mmu)	N/A	N/A	N/A	Method	True	False	N/A	N/A	N/A			Pass	Pass	N/A	N/A	N/A	Confirmed	N/A
69	Processed	190522-069		Unknown		1068									SCN-Bimane IS	T1C1	Internal Standard	527	1349	2.23	2.23	0.00		M+	N/A	N/A	N/A	N/A	126.1	126.1	-.002 (mmu)	N/A	N/A	N/A	Method	True	False	N/A	N/A	N/A			Pass	Pass	N/A	N/A	N/A	Confirmed	N/A
70	Processed	190522-070		Unknown		1069									SCN-Bimane	T1	Target Compound	542	1340	2.23	2.23	0.00		M+	16.015	N/A	16.015	N/A	111	111	.000 (mmu)	0.714	1	1876	Method	True	False	N/A	N/A	N/A			Pass	Pass	N/A	N/A	N/A	Confirmed	N/A
70	Processed	190522-070		Unknown		1069									SCN-Bimane	T1C1	Target Compound	316	609	2.23	2.23	0.00		M+	N/A	N/A	N/A	N/A	124.1	124.1	-.002 (mmu)	0.714	N/A	N/A	Method	True	False	N/A	N/A	N/A			Pass	Pass	N/A	N/A	N/A	Confirmed	N/A
70	Processed	190522-070		Unknown		1069									SCN-Bimane IS	T1	Internal Standard	728	1876	2.24	2.23	-0.01		M+	1	1	1	N/A	111	111	.000 (mmu)	N/A	N/A	N/A	Method	True	False	N/A	N/A	N/A			Pass	Pass	N/A	N/A	N/A	Confirmed	N/A
70	Processed	190522-070		Unknown		1069									SCN-Bimane IS	T1C1	Internal Standard	431	1196	2.23	2.23	0.00		M+	N/A	N/A	N/A	N/A	126.1	126.1	-.002 (mmu)	N/A	N/A	N/A	Method	True	False	N/A	N/A	N/A			Pass	Pass	N/A	N/A	N/A	Confirmed	N/A
71	Processed	190522-071		Unknown		1070									SCN-Bimane	T1	Target Compound	112	286	2.23	2.23	0.00		M+	2.881	N/A	2.881	N/A	111	111	.000 (mmu)	0.136	1	2105	Method	True	False	N/A	N/A	N/A			Pass	Pass	N/A	N/A	N/A	Confirmed	N/A
71	Processed	190522-071		Unknown		1070									SCN-Bimane	T1C1	Target Compound	66	131	2.23	2.24	-0.02		M+	N/A	N/A	N/A	N/A	124.1	124.1	-.002 (mmu)	0.136	N/A	N/A	Method	True	False	N/A	N/A	N/A			Pass	Pass	N/A	N/A	N/A	Confirmed	N/A
71	Processed	190522-071		Unknown		1070									SCN-Bimane IS	T1	Internal Standard	1045	2105	2.24	2.23	-0.01		M+	1	1	1	N/A	111	111	.000 (mmu)	N/A	N/A	N/A	Method	True	False	N/A	N/A	N/A			Pass	Pass	N/A	N/A	N/A	Confirmed	N/A
71	Processed	190522-071		Unknown		1070									SCN-Bimane IS	T1C1	Internal Standard	430	1157	2.23	2.23	0.00		M+	N/A	N/A	N/A	N/A	126.1	126.1	-.002 (mmu)	N/A	N/A	N/A	Method	True	False	N/A	N/A	N/A			Pass	Pass	N/A	N/A	N/A	Confirmed	N/A
72	Processed	190522-072		Unknown		1071									SCN-Bimane	T1	Target Compound	196	419	2.23	2.24	0.01		M+	4.085	N/A	4.085	N/A	111	111	.000 (mmu)	0.189	1	2221	Method	True	False	N/A	N/A	N/A			Pass	Pass	N/A	N/A	N/A	Confirmed	N/A
72	Processed	190522-072		Unknown		1071									SCN-Bimane	T1C1	Target Compound	113	187	2.24	2.22	0.02		M+	N/A	N/A	N/A	N/A	124.1	124.1	-.002 (mmu)	0.189	N/A	N/A	Method	True	False	N/A	N/A	N/A			Pass	Pass	N/A	N/A	N/A	Confirmed	N/A
72	Processed	190522-072		Unknown		1071									SCN-Bimane IS	T1	Internal Standard	945	2221	2.24	2.23	-0.01		M+	1	1	1	N/A	111	111	.000 (mmu)	N/A	N/A	N/A	Method	True	False	N/A	N/A	N/A			Pass	Pass	N/A	N/A	N/A	Confirmed	N/A
72	Processed	190522-072		Unknown		1071									SCN-Bimane IS	T1C1	Internal Standard	386	1232	2.23	2.24	-0.01		M+	N/A	N/A	N/A	N/A	126.1	126.1	-.002 (mmu)	N/A	N/A	N/A	Method	True	False	N/A	N/A	N/A			Pass	Pass	N/A	N/A	N/A	Confirmed	N/A
73	Processed	190522-073		Unknown		1072									SCN-Bimane	T1	Target Compound	16	14	2.23	2.21	-0.02		M+	-0.016	N/A	-0.016	N/A	111	111	.000 (mmu)	0.008	1	1697	Method	True	False	N/A	N/A	N/A			Pass	Fail	N/A	N/A	N/A	Identified	N/A
73	Processed	190522-073		Unknown		1072									SCN-Bimane	T1C1	Target Compound	18	14	2.21	2.23	-0.02		M+	N/A	N/A	N/A	N/A	124.1	124.1	-.002 (mmu)	0.008	N/A	N/A	Method	True	False	N/A	N/A	N/A			Pass	Fail	N/A	N/A	N/A	Identified	N/A
73	Processed	190522-073		Unknown		1072									SCN-Bimane IS	T1	Internal Standard	745	1697	2.24	2.23	-0.01		M+	1	1	1	N/A	111	111	.000 (mmu)	N/A	N/A	N/A	Method	True	False	N/A	N/A	N/A			Pass	Pass	N/A	N/A	N/A	Confirmed	N/A
73	Processed	190522-073		Unknown		1072									SCN-Bimane IS	T1C1	Internal Standard	457	1270	2.23	2.23	0.00		M+	N/A	N/A	N/A	N/A	126.1	126.1	-.002 (mmu)	N/A	N/A	N/A	Method	True	False	N/A	N/A	N/A			Pass	Pass	N/A	N/A	N/A	Confirmed	N/A
74	Processed	190522-074		Unknown		1073									SCN-Bimane	T1	Target Compound	5	2	2.23	2.22	-0.01		M+	-0.179	N/A	-0.179	N/A	111	111	.000 (mmu)	0.001	1	2227	Method	True	False	N/A	N/A	N/A			Pass	Fail	N/A	N/A	N/A	Identified	N/A
74	Processed	190522-074		Unknown		1073									SCN-Bimane	T1C1	Target Compound	17	7	2.22	2.24	-0.02		M+	N/A	N/A	N/A	N/A	124.1	124.1	-.002 (mmu)	0.001	N/A	N/A	Method	True	False	N/A	N/A	N/A			Pass	Fail	N/A	N/A	N/A	Identified	N/A
74	Processed	190522-074		Unknown		1073									SCN-Bimane IS	T1	Internal Standard	852	2227	2.24	2.23	-0.01		M+	1	1	1	N/A	111	111	.000 (mmu)	N/A	N/A	N/A	Method	True	False	N/A	N/A	N/A			Pass	Pass	N/A	N/A	N/A	Confirmed	N/A
74	Processed	190522-074		Unknown		1073									SCN-Bimane IS	T1C1	Internal Standard	524	1326	2.23	2.23	0.01		M+	N/A	N/A	N/A	N/A	126.1	126.1	-.002 (mmu)	N/A	N/A	N/A	Method	True	False	N/A	N/A	N/A			Pass	Pass	N/A	N/A	N/A	Confirmed	N/A
75	Processed	190522-075		Unknown		1074									SCN-Bimane	T1	Target Compound	2157	5388	2.23	2.24	0.01		M+	49.294	N/A	49.294	N/A	111	111	.000 (mmu)	2.181	1	2471	Method	True	False	N/A	N/A	N/A			Pass	Pass	N/A	N/A	N/A	Confirmed	N/A
75	Processed	190522-075		Unknown		1074									SCN-Bimane	T1C1	Target Compound	1143	2661	2.24	2.23	0.00		M+	N/A	N/A	N/A	N/A	124.1	124.1	-.002 (mmu)	2.181	N/A	N/A	Method	True	False	N/A	N/A	N/A			Pass	Pass	N/A	N/A	N/A	Confirmed	N/A
75	Processed	190522-075		Unknown		1074									SCN-Bimane IS	T1	Internal Standard	928	2471	2.24	2.23	-0.01		M+	1	1	1	N/A	111	111	.000 (mmu)	N/A	N/A	N/A	Method	True	False	N/A	N/A	N/A			Pass	Pass	N/A	N/A	N/A	Confirmed	N/A
75	Processed	190522-075		Unknown		1074									SCN-Bimane IS	T1C1	Internal Standard	550	1520	2.23	2.23	0.00		M+	N/A	N/A	N/A	N/A	126.1	126.1	-.002 (mmu)	N/A	N/A	N/A	Method	True	False	N/A	N/A	N/A			Pass	Pass	N/A	N/A	N/A	Confirmed	N/A
76	Processed	190522-076		Unknown		1075									SCN-Bimane	T1	Target Compound	2108	4908	2.23	2.24	0.01		M+	42.153	N/A	42.153	N/A	111	111	.000 (mmu)	1.866	1	2630	Method	True	False	N/A	N/A	N/A			Pass	Pass	N/A	N/A	N/A	Confirmed	N/A
76	Processed	190522-076		Unknown		1075									SCN-Bimane	T1C1	Target Compound	821	2190	2.24	2.23	0.01		M+	N/A	N/A	N/A	N/A	124.1	124.1	-.002 (mmu)	1.866	N/A	N/A	Method	True	False	N/A	N/A	N/A			Pass	Pass	N/A	N/A	N/A	Confirmed	N/A
76	Processed	190522-076		Unknown		1075									SCN-Bimane IS	T1	Internal Standard	1170	2630	2.24	2.23	-0.01		M+	1	1	1	N/A	111	111	.000 (mmu)	N/A	N/A	N/A	Method	True	False	N/A	N/A	N/A			Pass	Pass	N/A	N/A	N/A	Confirmed	N/A
76	Processed	190522-076		Unknown		1075									SCN-Bimane IS	T1C1	Internal Standard	539	1655	2.23	2.24	-0.01		M+	N/A	N/A	N/A	N/A	126.1	126.1	-.002 (mmu)	N/A	N/A	N/A	Method	True	False	N/A	N/A	N/A			Pass	Pass	N/A	N/A	N/A	Confirmed	N/A
77	Processed	190522-077		Unknown		1076									SCN-Bimane	T1	Target Compound	60	91	2.23	2.23	0.00		M+	1.219	N/A	1.219	N/A	111	111	.000 (mmu)	0.063	1	1462	Method	True	False	N/A	N/A	N/A			Pass	Fail	N/A	N/A	N/A	Identified	N/A
77	Processed	190522-077		Unknown		1076									SCN-Bimane	T1C1	Target Compound	17	13	2.23	2.22	0.01		M+	N/A	N/A	N/A	N/A	124.1	124.1	-.002 (mmu)	0.063	N/A	N/A	Method	True	False	N/A	N/A	N/A			Pass	Fail	N/A	N/A	N/A	Identified	N/A
77	Processed	190522-077		Unknown		1076									SCN-Bimane IS	T1	Internal Standard	604	1462	2.24	2.24	0.00		M+	1	1	1	N/A	111	111	.000 (mmu)	N/A	N/A	N/A	Method	True	False	N/A	N/A	N/A			Pass	Pass	N/A	N/A	N/A	Confirmed	N/A
77	Processed	190522-077		Unknown		1076									SCN-Bimane IS	T1C1	Internal Standard	358	947	2.24	2.23	0.01		M+	N/A	N/A	N/A	N/A	126.1	126.1	-.002 (mmu)	N/A	N/A	N/A	Method	True	False	N/A	N/A	N/A			Pass	Pass	N/A	N/A	N/A	Confirmed	N/A
78	Processed	190522-078		Unknown		1077									SCN-Bimane	T1	Target Compound	53	44	2.23	2.26	0.03		M+	0.244	N/A	0.244	N/A	111	111	.000 (mmu)	0.02	1	2242	Method	True	False	N/A	N/A	N/A			Pass	Pass	N/A	N/A	N/A	Confirmed	N/A
78	Processed	190522-078		Unknown		1077									SCN-Bimane	T1C1	Target Compound	16	25	2.26	2.23	0.03		M+	N/A	N/A	N/A	N/A	124.1	124.1	-.002 (mmu)	0.02	N/A	N/A	Method	True	False	N/A	N/A	N/A			Pass	Pass	N/A	N/A	N/A	Confirmed	N/A
78	Processed	190522-078		Unknown		1077									SCN-Bimane IS	T1	Internal Standard	911	2242	2.24	2.23	-0.01		M+	1	1	1	N/A	111	111	.000 (mmu)	N/A	N/A	N/A	Method	True	False	N/A	N/A	N/A			Pass	Pass	N/A	N/A	N/A	Confirmed	N/A
78	Processed	190522-078		Unknown		1077									SCN-Bimane IS	T1C1	Internal Standard	485	1426	2.23	2.24	-0.01		M+	N/A	N/A	N/A	N/A	126.1	126.1	-.002 (mmu)	N/A	N/A	N/A	Method	True	False	N/A	N/A	N/A			Pass	Pass	N/A	N/A	N/A	Confirmed	N/A
79	Processed	190522-079		Unknown		1078									SCN-Bimane	T1	Target Compound	35	56	2.23	2.22	-0.01		M+	0.359	N/A	0.359	N/A	111	111	.000 (mmu)	0.025	1	2272	Method	True	False	N/A	N/A	N/A			Pass	Fail	N/A	N/A	N/A	Identified	N/A
79	Processed	190522-079		Unknown		1078									SCN-Bimane	T1C1	Target Compound	13	8	2.22	2.22	0.00		M+	N/A	N/A	N/A	N/A	124.1	124.1	-.002 (mmu)	0.025	N/A	N/A	Method	True	False	N/A	N/A	N/A			Pass	Fail	N/A	N/A	N/A	Identified	N/A
79	Processed	190522-079		Unknown		1078									SCN-Bimane IS	T1	Internal Standard	855	2272	2.24	2.23	-0.01		M+	1	1	1	N/A	111	111	.000 (mmu)	N/A	N/A	N/A	Method	True	False	N/A	N/A	N/A			Pass	Pass	N/A	N/A	N/A	Confirmed	N/A
79	Processed	190522-079		Unknown		1078									SCN-Bimane IS	T1C1	Internal Standard	556	1548	2.23	2.23	-0.01		M+	N/A	N/A	N/A	N/A	126.1	126.1	-.002 (mmu)	N/A	N/A	N/A	Method	True	False	N/A	N/A	N/A			Pass	Pass	N/A	N/A	N/A	Confirmed	N/A
80	Processed	190522-080		Unknown		1079									SCN-Bimane	T1	Target Compound	37	26	2.23	2.22	-0.01		M+	0.288	N/A	0.288	N/A	111	111	.000 (mmu)	0.022	1	1192	Method	True	False	N/A	N/A	N/A			Pass	Fail	N/A	N/A	N/A	Identified	N/A
80	Processed	190522-080		Unknown		1079									SCN-Bimane	T1C1	Target Compound	41	32	2.22	2.23	-0.01		M+	N/A	N/A	N/A	N/A	124.1	124.1	-.002 (mmu)	0.022	N/A	N/A	Method	True	False	N/A	N/A	N/A			Pass	Fail	N/A	N/A	N/A	Identified	N/A
80	Processed	190522-080		Unknown		1079									SCN-Bimane IS	T1	Internal Standard	512	1192	2.24	2.23	-0.01		M+	1	1	1	N/A	111	111	.000 (mmu)	N/A	N/A	N/A	Method	True	False	N/A	N/A	N/A			Pass	Pass	N/A	N/A	N/A	Confirmed	N/A
80	Processed	190522-080		Unknown		1079									SCN-Bimane IS	T1C1	Internal Standard	242	829	2.23	2.23	0.00		M+	N/A	N/A	N/A	N/A	126.1	126.1	-.002 (mmu)	N/A	N/A	N/A	Method	True	False	N/A	N/A	N/A			Pass	Pass	N/A	N/A	N/A	Confirmed	N/A
81	Processed	190522-081		Unknown		1080									SCN-Bimane	T1	Target Compound	2892	7604	2.23	2.24	0.01		M+	71.028	N/A	71.028	N/A	111	111	.000 (mmu)	3.139	1	2423	Method	True	False	N/A	N/A	N/A			Pass	Pass	N/A	N/A	N/A	Confirmed	N/A
81	Processed	190522-081		Unknown		1080									SCN-Bimane	T1C1	Target Compound	1201	3314	2.24	2.23	0.01		M+	N/A	N/A	N/A	N/A	124.1	124.1	-.002 (mmu)	3.139	N/A	N/A	Method	True	False	N/A	N/A	N/A			Pass	Pass	N/A	N/A	N/A	Confirmed	N/A
81	Processed	190522-081		Unknown		1080									SCN-Bimane IS	T1	Internal Standard	871	2423	2.24	2.24	0.00		M+	1	1	1	N/A	111	111	.000 (mmu)	N/A	N/A	N/A	Method	True	False	N/A	N/A	N/A			Pass	Pass	N/A	N/A	N/A	Confirmed	N/A
81	Processed	190522-081		Unknown		1080									SCN-Bimane IS	T1C1	Internal Standard	435	1287	2.24	2.24	0.00		M+	N/A	N/A	N/A	N/A	126.1	126.1	-.002 (mmu)	N/A	N/A	N/A	Method	True	False	N/A	N/A	N/A			Pass	Pass	N/A	N/A	N/A	Confirmed	N/A
82	Processed	190522-082		Unknown		1081									SCN-Bimane	T1	Target Compound	2549	6369	2.23	2.24	0.01		M+	57.722	N/A	57.722	N/A	111	111	.000 (mmu)	2.552	1	2496	Method	True	False	N/A	N/A	N/A			Pass	Pass	N/A	N/A	N/A	Confirmed	N/A
82	Processed	190522-082		Unknown		1081									SCN-Bimane	T1C1	Target Compound	1262	3321	2.24	2.23	0.00		M+	N/A	N/A	N/A	N/A	124.1	124.1	-.002 (mmu)	2.552	N/A	N/A	Method	True	False	N/A	N/A	N/A			Pass	Pass	N/A	N/A	N/A	Confirmed	N/A
82	Processed	190522-082		Unknown		1081									SCN-Bimane IS	T1	Internal Standard	1002	2496	2.24	2.24	0.00		M+	1	1	1	N/A	111	111	.000 (mmu)	N/A	N/A	N/A	Method	True	False	N/A	N/A	N/A			Pass	Pass	N/A	N/A	N/A	Confirmed	N/A
82	Processed	190522-082		Unknown		1081									SCN-Bimane IS	T1C1	Internal Standard	556	1670	2.24	2.23	0.01		M+	N/A	N/A	N/A	N/A	126.1	126.1	-.002 (mmu)	N/A	N/A	N/A	Method	True	False	N/A	N/A	N/A			Pass	Pass	N/A	N/A	N/A	Confirmed	N/A
83	Processed	190522-083		Unknown		1082									SCN-Bimane	T1	Target Compound	348	867	2.23	2.24	0.01		M+	9.202	N/A	9.202	N/A	111	111	.000 (mmu)	0.414	1	2094	Method	True	False	N/A	N/A	N/A			Pass	Pass	N/A	N/A	N/A	Confirmed	N/A
83	Processed	190522-083		Unknown		1082									SCN-Bimane	T1C1	Target Compound	142	395	2.24	2.24	0.00		M+	N/A	N/A	N/A	N/A	124.1	124.1	-.002 (mmu)	0.414	N/A	N/A	Method	True	False	N/A	N/A	N/A			Pass	Pass	N/A	N/A	N/A	Confirmed	N/A
83	Processed	190522-083		Unknown		1082									SCN-Bimane IS	T1	Internal Standard	809	2094	2.24	2.24	0.00		M+	1	1	1	N/A	111	111	.000 (mmu)	N/A	N/A	N/A	Method	True	False	N/A	N/A	N/A			Pass	Fail	N/A	N/A	N/A	Identified	N/A
83	Processed	190522-083		Unknown		1082									SCN-Bimane IS	T1C1	Internal Standard	571	1753	2.24	2.24	0.00		M+	N/A	N/A	N/A	N/A	126.1	126.1	-.002 (mmu)	N/A	N/A	N/A	Method	True	False	N/A	N/A	N/A			Pass	Fail	N/A	N/A	N/A	Identified	N/A
84	Processed	190522-084		Unknown		1083									SCN-Bimane	T1	Target Compound	244	670	2.23	2.23	0.00		M+	6.398	N/A	6.398	N/A	111	111	.000 (mmu)	0.291	1	2305	Method	True	False	N/A	N/A	N/A			Pass	Pass	N/A	N/A	N/A	Confirmed	N/A
84	Processed	190522-084		Unknown		1083									SCN-Bimane	T1C1	Target Compound	133	373	2.23	2.23	0.00		M+	N/A	N/A	N/A	N/A	124.1	124.1	-.002 (mmu)	0.291	N/A	N/A	Method	True	False	N/A	N/A	N/A			Pass	Pass	N/A	N/A	N/A	Confirmed	N/A
84	Processed	190522-084		Unknown		1083									SCN-Bimane IS	T1	Internal Standard	920	2305	2.24	2.24	0.00		M+	1	1	1	N/A	111	111	.000 (mmu)	N/A	N/A	N/A	Method	True	False	N/A	N/A	N/A			Pass	Pass	N/A	N/A	N/A	Confirmed	N/A
84	Processed	190522-084		Unknown		1083									SCN-Bimane IS	T1C1	Internal Standard	432	1439	2.24	2.23	0.01		M+	N/A	N/A	N/A	N/A	126.1	126.1	-.002 (mmu)	N/A	N/A	N/A	Method	True	False	N/A	N/A	N/A			Pass	Pass	N/A	N/A	N/A	Confirmed	N/A
85	Processed	190522-085		Unknown		1084									SCN-Bimane	T1	Target Compound	42	45	2.23	2.24	0.01		M+	0.276	N/A	0.276	N/A	111	111	.000 (mmu)	0.021	1	2162	Method	True	False	N/A	N/A	N/A			Pass	Pass	N/A	N/A	N/A	Confirmed	N/A
85	Processed	190522-085		Unknown		1084									SCN-Bimane	T1C1	Target Compound	28	26	2.24	2.24	0.00		M+	N/A	N/A	N/A	N/A	124.1	124.1	-.002 (mmu)	0.021	N/A	N/A	Method	True	False	N/A	N/A	N/A			Pass	Pass	N/A	N/A	N/A	Confirmed	N/A
85	Processed	190522-085		Unknown		1084									SCN-Bimane IS	T1	Internal Standard	870	2162	2.24	2.23	-0.01		M+	1	1	1	N/A	111	111	.000 (mmu)	N/A	N/A	N/A	Method	True	False	N/A	N/A	N/A			Pass	Pass	N/A	N/A	N/A	Confirmed	N/A
85	Processed	190522-085		Unknown		1084									SCN-Bimane IS	T1C1	Internal Standard	460	1379	2.23	2.25	-0.02		M+	N/A	N/A	N/A	N/A	126.1	126.1	-.002 (mmu)	N/A	N/A	N/A	Method	True	False	N/A	N/A	N/A			Pass	Pass	N/A	N/A	N/A	Confirmed	N/A
86	Processed	190522-086		Unknown		1085									SCN-Bimane	T1	Target Compound	75	108	2.23	2.23	0.00		M+	1.04	N/A	1.04	N/A	111	111	.000 (mmu)	0.055	1	1969	Method	True	False	N/A	N/A	N/A			Pass	Pass	N/A	N/A	N/A	Confirmed	N/A
86	Processed	190522-086		Unknown		1085									SCN-Bimane	T1C1	Target Compound	62	60	2.23	2.23	0.00		M+	N/A	N/A	N/A	N/A	124.1	124.1	-.002 (mmu)	0.055	N/A	N/A	Method	True	False	N/A	N/A	N/A			Pass	Pass	N/A	N/A	N/A	Confirmed	N/A
86	Processed	190522-086		Unknown		1085									SCN-Bimane IS	T1	Internal Standard	927	1969	2.24	2.23	-0.01		M+	1	1	1	N/A	111	111	.000 (mmu)	N/A	N/A	N/A	Method	True	False	N/A	N/A	N/A			Pass	Fail	N/A	N/A	N/A	Identified	N/A
86	Processed	190522-086		Unknown		1085									SCN-Bimane IS	T1C1	Internal Standard	522	1801	2.23	2.23	0.00		M+	N/A	N/A	N/A	N/A	126.1	126.1	-.002 (mmu)	N/A	N/A	N/A	Method	True	False	N/A	N/A	N/A			Pass	Fail	N/A	N/A	N/A	Identified	N/A
87	Processed	190522-087		Unknown		1086									SCN-Bimane	T1	Target Compound	72	97	2.23	2.23	0.00		M+	1.106	N/A	1.106	N/A	111	111	.000 (mmu)	0.058	1	1679	Method	True	False	N/A	N/A	N/A			Pass	Fail	N/A	N/A	N/A	Identified	N/A
87	Processed	190522-087		Unknown		1086									SCN-Bimane	T1C1	Target Compound	47	71	2.23	2.23	0.00		M+	N/A	N/A	N/A	N/A	124.1	124.1	-.002 (mmu)	0.058	N/A	N/A	Method	True	False	N/A	N/A	N/A			Pass	Fail	N/A	N/A	N/A	Identified	N/A
87	Processed	190522-087		Unknown		1086									SCN-Bimane IS	T1	Internal Standard	706	1679	2.24	2.23	-0.01		M+	1	1	1	N/A	111	111	.000 (mmu)	N/A	N/A	N/A	Method	True	False	N/A	N/A	N/A			Pass	Fail	N/A	N/A	N/A	Identified	N/A
87	Processed	190522-087		Unknown		1086									SCN-Bimane IS	T1C1	Internal Standard	416	1451	2.23	2.23	0.01		M+	N/A	N/A	N/A	N/A	126.1	126.1	-.002 (mmu)	N/A	N/A	N/A	Method	True	False	N/A	N/A	N/A			Pass	Fail	N/A	N/A	N/A	Identified	N/A
88	Processed	190522-088		Unknown		1087									SCN-Bimane	T1	Target Compound	55	95	2.23	2.23	0.00		M+	0.871	N/A	0.871	N/A	111	111	.000 (mmu)	0.047	1	2016	Method	True	False	N/A	N/A	N/A			Pass	Fail	N/A	N/A	N/A	Identified	N/A
88	Processed	190522-088		Unknown		1087									SCN-Bimane	T1C1	Target Compound	22	25	2.23	2.23	-0.01		M+	N/A	N/A	N/A	N/A	124.1	124.1	-.002 (mmu)	0.047	N/A	N/A	Method	True	False	N/A	N/A	N/A			Pass	Fail	N/A	N/A	N/A	Identified	N/A
88	Processed	190522-088		Unknown		1087									SCN-Bimane IS	T1	Internal Standard	884	2016	2.24	2.23	-0.01		M+	1	1	1	N/A	111	111	.000 (mmu)	N/A	N/A	N/A	Method	True	False	N/A	N/A	N/A			Pass	Fail	N/A	N/A	N/A	Identified	N/A
88	Processed	190522-088		Unknown		1087									SCN-Bimane IS	T1C1	Internal Standard	452	1984	2.23	2.23	0.00		M+	N/A	N/A	N/A	N/A	126.1	126.1	-.002 (mmu)	N/A	N/A	N/A	Method	True	False	N/A	N/A	N/A			Pass	Fail	N/A	N/A	N/A	Identified	N/A
89	Processed	190522-089		Unknown		1088									SCN-Bimane	T1	Target Compound	977	2550	2.23	2.24	0.01		M+	20.327	N/A	20.327	N/A	111	111	.000 (mmu)	0.904	1	2819	Method	True	False	N/A	N/A	N/A			Pass	Pass	N/A	N/A	N/A	Confirmed	N/A
89	Processed	190522-089		Unknown		1088									SCN-Bimane	T1C1	Target Compound	446	1175	2.24	2.23	0.01		M+	N/A	N/A	N/A	N/A	124.1	124.1	-.002 (mmu)	0.904	N/A	N/A	Method	True	False	N/A	N/A	N/A			Pass	Pass	N/A	N/A	N/A	Confirmed	N/A
89	Processed	190522-089		Unknown		1088									SCN-Bimane IS	T1	Internal Standard	1194	2819	2.24	2.24	0.00		M+	1	1	1	N/A	111	111	.000 (mmu)	N/A	N/A	N/A	Method	True	False	N/A	N/A	N/A			Pass	Pass	N/A	N/A	N/A	Confirmed	N/A
89	Processed	190522-089		Unknown		1088									SCN-Bimane IS	T1C1	Internal Standard	619	1670	2.24	2.24	0.01		M+	N/A	N/A	N/A	N/A	126.1	126.1	-.002 (mmu)	N/A	N/A	N/A	Method	True	False	N/A	N/A	N/A			Pass	Pass	N/A	N/A	N/A	Confirmed	N/A
90	Processed	190522-090		Unknown		1089									SCN-Bimane	T1	Target Compound	1281	3127	2.23	2.24	0.01		M+	18.282	N/A	18.282	N/A	111	111	.000 (mmu)	0.814	1	3839	Method	True	False	N/A	N/A	N/A			Pass	Pass	N/A	N/A	N/A	Confirmed	N/A
90	Processed	190522-090		Unknown		1089									SCN-Bimane	T1C1	Target Compound	639	1637	2.24	2.23	0.00		M+	N/A	N/A	N/A	N/A	124.1	124.1	-.002 (mmu)	0.814	N/A	N/A	Method	True	False	N/A	N/A	N/A			Pass	Pass	N/A	N/A	N/A	Confirmed	N/A
90	Processed	190522-090		Unknown		1089									SCN-Bimane IS	T1	Internal Standard	1392	3839	2.24	2.24	0.00		M+	1	1	1	N/A	111	111	.000 (mmu)	N/A	N/A	N/A	Method	True	False	N/A	N/A	N/A			Pass	Pass	N/A	N/A	N/A	Confirmed	N/A
90	Processed	190522-090		Unknown		1089									SCN-Bimane IS	T1C1	Internal Standard	851	2537	2.24	2.24	0.00		M+	N/A	N/A	N/A	N/A	126.1	126.1	-.002 (mmu)	N/A	N/A	N/A	Method	True	False	N/A	N/A	N/A			Pass	Pass	N/A	N/A	N/A	Confirmed	N/A
91	Processed	190522-091		Unknown		1090									SCN-Bimane	T1	Target Compound	1948	5250	2.23	2.23	0.00		M+	44.808	N/A	44.808	N/A	111	111	.000 (mmu)	1.983	1	2647	Method	True	False	N/A	N/A	N/A			Pass	Pass	N/A	N/A	N/A	Confirmed	N/A
91	Processed	190522-091		Unknown		1090									SCN-Bimane	T1C1	Target Compound	968	2504	2.23	2.24	-0.01		M+	N/A	N/A	N/A	N/A	124.1	124.1	-.002 (mmu)	1.983	N/A	N/A	Method	True	False	N/A	N/A	N/A			Pass	Pass	N/A	N/A	N/A	Confirmed	N/A
91	Processed	190522-091		Unknown		1090									SCN-Bimane IS	T1	Internal Standard	1123	2647	2.24	2.24	0.00		M+	1	1	1	N/A	111	111	.000 (mmu)	N/A	N/A	N/A	Method	True	False	N/A	N/A	N/A			Pass	Pass	N/A	N/A	N/A	Confirmed	N/A
91	Processed	190522-091		Unknown		1090									SCN-Bimane IS	T1C1	Internal Standard	527	1652	2.24	2.25	-0.01		M+	N/A	N/A	N/A	N/A	126.1	126.1	-.002 (mmu)	N/A	N/A	N/A	Method	True	False	N/A	N/A	N/A			Pass	Pass	N/A	N/A	N/A	Confirmed	N/A
92	Processed	190522-092		Unknown		1091									SCN-Bimane	T1	Target Compound	1910	5018	2.23	2.23	0.00		M+	43.855	N/A	43.855	N/A	111	111	.000 (mmu)	1.941	1	2585	Method	True	False	N/A	N/A	N/A			Pass	Pass	N/A	N/A	N/A	Confirmed	N/A
92	Processed	190522-092		Unknown		1091									SCN-Bimane	T1C1	Target Compound	998	2396	2.23	2.23	0.00		M+	N/A	N/A	N/A	N/A	124.1	124.1	-.002 (mmu)	1.941	N/A	N/A	Method	True	False	N/A	N/A	N/A			Pass	Pass	N/A	N/A	N/A	Confirmed	N/A
92	Processed	190522-092		Unknown		1091									SCN-Bimane IS	T1	Internal Standard	961	2585	2.24	2.24	0.00		M+	1	1	1	N/A	111	111	.000 (mmu)	N/A	N/A	N/A	Method	True	False	N/A	N/A	N/A			Pass	Pass	N/A	N/A	N/A	Confirmed	N/A
92	Processed	190522-092		Unknown		1091									SCN-Bimane IS	T1C1	Internal Standard	530	1686	2.24	2.24	0.00		M+	N/A	N/A	N/A	N/A	126.1	126.1	-.002 (mmu)	N/A	N/A	N/A	Method	True	False	N/A	N/A	N/A			Pass	Pass	N/A	N/A	N/A	Confirmed	N/A
93	Processed	190522-093		Unknown		1092									SCN-Bimane	T1	Target Compound	65	66	2.23	2.24	0.01		M+	0.23	N/A	0.23	N/A	111	111	.000 (mmu)	0.019	1	3501	Method	True	False	N/A	N/A	N/A			Pass	Fail	N/A	N/A	N/A	Identified	N/A
93	Processed	190522-093		Unknown		1092									SCN-Bimane	T1C1	Target Compound	18	14	2.24	2.24	0.00		M+	N/A	N/A	N/A	N/A	124.1	124.1	-.002 (mmu)	0.019	N/A	N/A	Method	True	False	N/A	N/A	N/A			Pass	Fail	N/A	N/A	N/A	Identified	N/A
93	Processed	190522-093		Unknown		1092									SCN-Bimane IS	T1	Internal Standard	1490	3501	2.24	2.23	-0.01		M+	1	1	1	N/A	111	111	.000 (mmu)	N/A	N/A	N/A	Method	True	False	N/A	N/A	N/A			Pass	Pass	N/A	N/A	N/A	Confirmed	N/A
93	Processed	190522-093		Unknown		1092									SCN-Bimane IS	T1C1	Internal Standard	775	2375	2.23	2.23	0.00		M+	N/A	N/A	N/A	N/A	126.1	126.1	-.002 (mmu)	N/A	N/A	N/A	Method	True	False	N/A	N/A	N/A			Pass	Pass	N/A	N/A	N/A	Confirmed	N/A
94	Processed	190522-094		Unknown		1093									SCN-Bimane	T1	Target Compound	119	222	2.23	2.23	0.00		M+	1.002	N/A	1.002	N/A	111	111	.000 (mmu)	0.053	1	4182	Method	True	False	N/A	N/A	N/A			Pass	Fail	N/A	N/A	N/A	Identified	N/A
94	Processed	190522-094		Unknown		1093									SCN-Bimane	T1C1	Target Compound	90	224	2.23	2.24	-0.01		M+	N/A	N/A	N/A	N/A	124.1	124.1	-.002 (mmu)	0.053	N/A	N/A	Method	True	False	N/A	N/A	N/A			Pass	Fail	N/A	N/A	N/A	Identified	N/A
94	Processed	190522-094		Unknown		1093									SCN-Bimane IS	T1	Internal Standard	1650	4182	2.24	2.23	-0.01		M+	1	1	1	N/A	111	111	.000 (mmu)	N/A	N/A	N/A	Method	True	False	N/A	N/A	N/A			Pass	Pass	N/A	N/A	N/A	Confirmed	N/A
94	Processed	190522-094		Unknown		1093									SCN-Bimane IS	T1C1	Internal Standard	820	2609	2.23	2.24	-0.01		M+	N/A	N/A	N/A	N/A	126.1	126.1	-.002 (mmu)	N/A	N/A	N/A	Method	True	False	N/A	N/A	N/A			Pass	Pass	N/A	N/A	N/A	Confirmed	N/A
95	Processed	190522-095		Unknown		1094									SCN-Bimane	T1	Target Compound	6320	15504	2.23	2.23	0.00		M+	80.517	N/A	80.517	N/A	111	111	.000 (mmu)	3.557	1	4359	Method	True	False	N/A	N/A	N/A			Pass	Pass	N/A	N/A	N/A	Confirmed	N/A
95	Processed	190522-095		Unknown		1094									SCN-Bimane	T1C1	Target Compound	3013	7535	2.23	2.23	0.00		M+	N/A	N/A	N/A	N/A	124.1	124.1	-.002 (mmu)	3.557	N/A	N/A	Method	True	False	N/A	N/A	N/A			Pass	Pass	N/A	N/A	N/A	Confirmed	N/A
95	Processed	190522-095		Unknown		1094									SCN-Bimane IS	T1	Internal Standard	1868	4359	2.24	2.23	-0.01		M+	1	1	1	N/A	111	111	.000 (mmu)	N/A	N/A	N/A	Method	True	False	N/A	N/A	N/A			Pass	Pass	N/A	N/A	N/A	Confirmed	N/A
95	Processed	190522-095		Unknown		1094									SCN-Bimane IS	T1C1	Internal Standard	903	2806	2.23	2.23	0.00		M+	N/A	N/A	N/A	N/A	126.1	126.1	-.002 (mmu)	N/A	N/A	N/A	Method	True	False	N/A	N/A	N/A			Pass	Pass	N/A	N/A	N/A	Confirmed	N/A
96	Processed	190522-096		Unknown		1095									SCN-Bimane	T1	Target Compound	5983	13464	2.23	2.24	0.01		M+	66.725	N/A	66.725	N/A	111	111	.000 (mmu)	2.949	1	4566	Method	True	False	N/A	N/A	N/A			Pass	Pass	N/A	N/A	N/A	Confirmed	N/A
96	Processed	190522-096		Unknown		1095									SCN-Bimane	T1C1	Target Compound	2636	6270	2.24	2.24	0.00		M+	N/A	N/A	N/A	N/A	124.1	124.1	-.002 (mmu)	2.949	N/A	N/A	Method	True	False	N/A	N/A	N/A			Pass	Pass	N/A	N/A	N/A	Confirmed	N/A
96	Processed	190522-096		Unknown		1095									SCN-Bimane IS	T1	Internal Standard	2009	4566	2.24	2.24	0.00		M+	1	1	1	N/A	111	111	.000 (mmu)	N/A	N/A	N/A	Method	True	False	N/A	N/A	N/A			Pass	Pass	N/A	N/A	N/A	Confirmed	N/A
96	Processed	190522-096		Unknown		1095									SCN-Bimane IS	T1C1	Internal Standard	901	3192	2.24	2.23	0.01		M+	N/A	N/A	N/A	N/A	126.1	126.1	-.002 (mmu)	N/A	N/A	N/A	Method	True	False	N/A	N/A	N/A			Pass	Pass	N/A	N/A	N/A	Confirmed	N/A
97	Processed	190522-097		Unknown		1096									SCN-Bimane	T1	Target Compound	8	6	2.23	2.24	0.01		M+	-0.094	N/A	-0.094	N/A	111	111	.000 (mmu)	0.005	1	1378	Method	True	False	N/A	N/A	N/A			Pass	Fail	N/A	N/A	N/A	Identified	N/A
97	Processed	190522-097		Unknown		1096									SCN-Bimane	T1C1	Target Compound	11	4	2.24	2.26	-0.03		M+	N/A	N/A	N/A	N/A	124.1	124.1	-.002 (mmu)	0.005	N/A	N/A	Method	True	False	N/A	N/A	N/A			Pass	Fail	N/A	N/A	N/A	Identified	N/A
97	Processed	190522-097		Unknown		1096									SCN-Bimane IS	T1	Internal Standard	513	1378	2.24	2.25	0.01		M+	1	1	1	N/A	111	111	.000 (mmu)	N/A	N/A	N/A	Method	True	False	N/A	N/A	N/A			Pass	Pass	N/A	N/A	N/A	Confirmed	N/A
97	Processed	190522-097		Unknown		1096									SCN-Bimane IS	T1C1	Internal Standard	288	1029	2.25	2.24	0.01		M+	N/A	N/A	N/A	N/A	126.1	126.1	-.002 (mmu)	N/A	N/A	N/A	Method	True	False	N/A	N/A	N/A			Pass	Pass	N/A	N/A	N/A	Confirmed	N/A
98	Processed	190522-098		Unknown		1097									SCN-Bimane	T1	Target Compound	62	94	2.23	2.23	0.00		M+	1.115	N/A	1.115	N/A	111	111	.000 (mmu)	0.058	1	1622	Method	True	False	N/A	N/A	N/A			Pass	Fail	N/A	N/A	N/A	Identified	N/A
98	Processed	190522-098		Unknown		1097									SCN-Bimane	T1C1	Target Compound	31	33	2.23	2.23	-0.01		M+	N/A	N/A	N/A	N/A	124.1	124.1	-.002 (mmu)	0.058	N/A	N/A	Method	True	False	N/A	N/A	N/A			Pass	Fail	N/A	N/A	N/A	Identified	N/A
98	Processed	190522-098		Unknown		1097									SCN-Bimane IS	T1	Internal Standard	658	1622	2.24	2.24	0.00		M+	1	1	1	N/A	111	111	.000 (mmu)	N/A	N/A	N/A	Method	True	False	N/A	N/A	N/A			Pass	Fail	N/A	N/A	N/A	Identified	N/A
98	Processed	190522-098		Unknown		1097									SCN-Bimane IS	T1C1	Internal Standard	455	1327	2.24	2.23	0.01		M+	N/A	N/A	N/A	N/A	126.1	126.1	-.002 (mmu)	N/A	N/A	N/A	Method	True	False	N/A	N/A	N/A			Pass	Fail	N/A	N/A	N/A	Identified	N/A
99	Processed	190522-099		Unknown		1098									SCN-Bimane	T1	Target Compound	2461	6227	2.23	2.23	0.00		M+	79.535	N/A	79.535	N/A	111	111	.000 (mmu)	3.513	1	1772	Method	True	False	N/A	N/A	N/A			Pass	Pass	N/A	N/A	N/A	Confirmed	N/A
99	Processed	190522-099		Unknown		1098									SCN-Bimane	T1C1	Target Compound	1139	3146	2.23	2.23	0.00		M+	N/A	N/A	N/A	N/A	124.1	124.1	-.002 (mmu)	3.513	N/A	N/A	Method	True	False	N/A	N/A	N/A			Pass	Pass	N/A	N/A	N/A	Confirmed	N/A
99	Processed	190522-099		Unknown		1098									SCN-Bimane IS	T1	Internal Standard	740	1772	2.24	2.23	-0.01		M+	1	1	1	N/A	111	111	.000 (mmu)	N/A	N/A	N/A	Method	True	False	N/A	N/A	N/A			Pass	Pass	N/A	N/A	N/A	Confirmed	N/A
99	Processed	190522-099		Unknown		1098									SCN-Bimane IS	T1C1	Internal Standard	422	1207	2.23	2.24	0.00		M+	N/A	N/A	N/A	N/A	126.1	126.1	-.002 (mmu)	N/A	N/A	N/A	Method	True	False	N/A	N/A	N/A			Pass	Pass	N/A	N/A	N/A	Confirmed	N/A
100	Processed	190522-100		Unknown		1099									SCN-Bimane	T1	Target Compound	2296	5761	2.23	2.23	0.00		M+	70.877	N/A	70.877	N/A	111	111	.000 (mmu)	3.132	1	1839	Method	True	False	N/A	N/A	N/A			Pass	Pass	N/A	N/A	N/A	Confirmed	N/A
100	Processed	190522-100		Unknown		1099									SCN-Bimane	T1C1	Target Compound	1050	2537	2.23	2.23	0.00		M+	N/A	N/A	N/A	N/A	124.1	124.1	-.002 (mmu)	3.132	N/A	N/A	Method	True	False	N/A	N/A	N/A			Pass	Pass	N/A	N/A	N/A	Confirmed	N/A
100	Processed	190522-100		Unknown		1099									SCN-Bimane IS	T1	Internal Standard	741	1839	2.24	2.24	0.00		M+	1	1	1	N/A	111	111	.000 (mmu)	N/A	N/A	N/A	Method	True	False	N/A	N/A	N/A			Pass	Fail	N/A	N/A	N/A	Identified	N/A
100	Processed	190522-100		Unknown		1099									SCN-Bimane IS	T1C1	Internal Standard	433	1475	2.24	2.24	0.00		M+	N/A	N/A	N/A	N/A	126.1	126.1	-.002 (mmu)	N/A	N/A	N/A	Method	True	False	N/A	N/A	N/A			Pass	Fail	N/A	N/A	N/A	Identified	N/A
101	Processed	190522-101		Unknown		1100									SCN-Bimane	T1	Target Compound	50	66	2.23	2.23	0.00		M+	0.467	N/A	0.467	N/A	111	111	.000 (mmu)	0.029	1	2232	Method	True	False	N/A	N/A	N/A			Pass	Fail	N/A	N/A	N/A	Identified	N/A
101	Processed	190522-101		Unknown		1100									SCN-Bimane	T1C1	Target Compound	25	43	2.23	2.23	0.00		M+	N/A	N/A	N/A	N/A	124.1	124.1	-.002 (mmu)	0.029	N/A	N/A	Method	True	False	N/A	N/A	N/A			Pass	Fail	N/A	N/A	N/A	Identified	N/A
101	Processed	190522-101		Unknown		1100									SCN-Bimane IS	T1	Internal Standard	1003	2232	2.24	2.23	-0.01		M+	1	1	1	N/A	111	111	.000 (mmu)	N/A	N/A	N/A	Method	True	False	N/A	N/A	N/A			Pass	Pass	N/A	N/A	N/A	Confirmed	N/A
101	Processed	190522-101		Unknown		1100									SCN-Bimane IS	T1C1	Internal Standard	521	1682	2.23	2.24	0.00		M+	N/A	N/A	N/A	N/A	126.1	126.1	-.002 (mmu)	N/A	N/A	N/A	Method	True	False	N/A	N/A	N/A			Pass	Pass	N/A	N/A	N/A	Confirmed	N/A
102	Processed	190522-102		Unknown		1101									SCN-Bimane	T1	Target Compound	6	3	2.23	2.26	0.03		M+	-0.166	N/A	-0.166	N/A	111	111	.000 (mmu)	0.002	1	1674	Method	True	False	N/A	N/A	N/A			Pass	Fail	N/A	N/A	N/A	Identified	N/A
102	Processed	190522-102		Unknown		1101									SCN-Bimane	T1C1	Target Compound	21	18	2.26	2.25	0.01		M+	N/A	N/A	N/A	N/A	124.1	124.1	-.002 (mmu)	0.002	N/A	N/A	Method	True	False	N/A	N/A	N/A			Pass	Fail	N/A	N/A	N/A	Identified	N/A
102	Processed	190522-102		Unknown		1101									SCN-Bimane IS	T1	Internal Standard	685	1674	2.24	2.24	0.00		M+	1	1	1	N/A	111	111	.000 (mmu)	N/A	N/A	N/A	Method	True	False	N/A	N/A	N/A			Pass	Pass	N/A	N/A	N/A	Confirmed	N/A
102	Processed	190522-102		Unknown		1101									SCN-Bimane IS	T1C1	Internal Standard	357	1158	2.24	2.23	0.01		M+	N/A	N/A	N/A	N/A	126.1	126.1	-.002 (mmu)	N/A	N/A	N/A	Method	True	False	N/A	N/A	N/A			Pass	Pass	N/A	N/A	N/A	Confirmed	N/A
103	Processed	190522-103		Unknown		1102									SCN-Bimane	T1	Target Compound	3840	9069	2.23	2.23	0.00		M+	74.117	N/A	74.117	N/A	111	111	.000 (mmu)	3.275	1	2769	Method	True	False	N/A	N/A	N/A			Pass	Pass	N/A	N/A	N/A	Confirmed	N/A
103	Processed	190522-103		Unknown		1102									SCN-Bimane	T1C1	Target Compound	1704	4114	2.23	2.23	0.00		M+	N/A	N/A	N/A	N/A	124.1	124.1	-.002 (mmu)	3.275	N/A	N/A	Method	True	False	N/A	N/A	N/A			Pass	Pass	N/A	N/A	N/A	Confirmed	N/A
103	Processed	190522-103		Unknown		1102									SCN-Bimane IS	T1	Internal Standard	1038	2769	2.24	2.23	-0.01		M+	1	1	1	N/A	111	111	.000 (mmu)	N/A	N/A	N/A	Method	True	False	N/A	N/A	N/A			Pass	Fail	N/A	N/A	N/A	Identified	N/A
103	Processed	190522-103		Unknown		1102									SCN-Bimane IS	T1C1	Internal Standard	699	2342	2.23	2.23	0.00		M+	N/A	N/A	N/A	N/A	126.1	126.1	-.002 (mmu)	N/A	N/A	N/A	Method	True	False	N/A	N/A	N/A			Pass	Fail	N/A	N/A	N/A	Identified	N/A
104	Processed	190522-104		Unknown		1103									SCN-Bimane	T1	Target Compound	3047	8032	2.23	2.24	0.01		M+	58.236	N/A	58.236	N/A	111	111	.000 (mmu)	2.575	1	3119	Method	True	False	N/A	N/A	N/A			Pass	Pass	N/A	N/A	N/A	Confirmed	N/A
104	Processed	190522-104		Unknown		1103									SCN-Bimane	T1C1	Target Compound	1684	3931	2.24	2.23	0.00		M+	N/A	N/A	N/A	N/A	124.1	124.1	-.002 (mmu)	2.575	N/A	N/A	Method	True	False	N/A	N/A	N/A			Pass	Pass	N/A	N/A	N/A	Confirmed	N/A
104	Processed	190522-104		Unknown		1103									SCN-Bimane IS	T1	Internal Standard	1278	3119	2.24	2.24	0.00		M+	1	1	1	N/A	111	111	.000 (mmu)	N/A	N/A	N/A	Method	True	False	N/A	N/A	N/A			Pass	Pass	N/A	N/A	N/A	Confirmed	N/A
104	Processed	190522-104		Unknown		1103									SCN-Bimane IS	T1C1	Internal Standard	696	1992	2.24	2.23	0.01		M+	N/A	N/A	N/A	N/A	126.1	126.1	-.002 (mmu)	N/A	N/A	N/A	Method	True	False	N/A	N/A	N/A			Pass	Pass	N/A	N/A	N/A	Confirmed	N/A
105	Processed	190522-105		Unknown		1104									SCN-Bimane	T1	Target Compound	79	138	2.23	2.22	-0.01		M+	0.929	N/A	0.929	N/A	111	111	.000 (mmu)	0.05	1	2782	Method	True	False	N/A	N/A	N/A			Pass	Fail	N/A	N/A	N/A	Identified	N/A
105	Processed	190522-105		Unknown		1104									SCN-Bimane	T1C1	Target Compound	63	125	2.22	2.22	0.00		M+	N/A	N/A	N/A	N/A	124.1	124.1	-.002 (mmu)	0.05	N/A	N/A	Method	True	False	N/A	N/A	N/A			Pass	Fail	N/A	N/A	N/A	Identified	N/A
105	Processed	190522-105		Unknown		1104									SCN-Bimane IS	T1	Internal Standard	1094	2782	2.24	2.24	0.00		M+	1	1	1	N/A	111	111	.000 (mmu)	N/A	N/A	N/A	Method	True	False	N/A	N/A	N/A			Pass	Pass	N/A	N/A	N/A	Confirmed	N/A
105	Processed	190522-105		Unknown		1104									SCN-Bimane IS	T1C1	Internal Standard	602	2059	2.24	2.23	0.01		M+	N/A	N/A	N/A	N/A	126.1	126.1	-.002 (mmu)	N/A	N/A	N/A	Method	True	False	N/A	N/A	N/A			Pass	Pass	N/A	N/A	N/A	Confirmed	N/A
106	Processed	190522-106		Unknown		1105									SCN-Bimane	T1	Target Compound	31	67	2.23	2.22	-0.01		M+	0.676	N/A	0.676	N/A	111	111	.000 (mmu)	0.039	1	1742	Method	True	False	N/A	N/A	N/A			Pass	Pass	N/A	N/A	N/A	Confirmed	N/A
106	Processed	190522-106		Unknown		1105									SCN-Bimane	T1C1	Target Compound	38	36	2.22	2.23	0.00		M+	N/A	N/A	N/A	N/A	124.1	124.1	-.002 (mmu)	0.039	N/A	N/A	Method	True	False	N/A	N/A	N/A			Pass	Pass	N/A	N/A	N/A	Confirmed	N/A
106	Processed	190522-106		Unknown		1105									SCN-Bimane IS	T1	Internal Standard	680	1742	2.24	2.23	-0.01		M+	1	1	1	N/A	111	111	.000 (mmu)	N/A	N/A	N/A	Method	True	False	N/A	N/A	N/A			Pass	Pass	N/A	N/A	N/A	Confirmed	N/A
106	Processed	190522-106		Unknown		1105									SCN-Bimane IS	T1C1	Internal Standard	381	1204	2.23	2.22	0.01		M+	N/A	N/A	N/A	N/A	126.1	126.1	-.002 (mmu)	N/A	N/A	N/A	Method	True	False	N/A	N/A	N/A			Pass	Pass	N/A	N/A	N/A	Confirmed	N/A
107	Processed	190522-107		Unknown		1106									SCN-Bimane	T1	Target Compound	N/F	N/F	2.23	N/F	N/F		N/A	N/F	N/A	N/F	N/A	111	N/F	N/F	N/F	1	1670	Method	True	False	N/A	N/A	N/A			Fail	N/A	N/A	N/A	N/A	NotFound	N/A
107	Processed	190522-107		Unknown		1106									SCN-Bimane	T1C1	Target Compound	N/F	N/F	0	N/A	N/A		M+	N/A	N/A	N/A	N/A	124.1	N/F	N/A	N/F	N/A	N/A	Method	True	False	N/A	N/A	N/A			Fail	N/A	N/A	N/A	N/A	NotFound	N/A
107	Processed	190522-107		Unknown		1106									SCN-Bimane IS	T1	Internal Standard	701	1670	2.24	2.23	-0.01		M+	1	1	1	N/A	111	111	.000 (mmu)	N/A	N/A	N/A	Method	True	False	N/A	N/A	N/A			Pass	Fail	N/A	N/A	N/A	Identified	N/A
107	Processed	190522-107		Unknown		1106									SCN-Bimane IS	T1C1	Internal Standard	357	1404	2.23	2.23	0.01		M+	N/A	N/A	N/A	N/A	126.1	126.1	-.002 (mmu)	N/A	N/A	N/A	Method	True	False	N/A	N/A	N/A			Pass	Fail	N/A	N/A	N/A	Identified	N/A
108	Processed	190522-108		Unknown		1107									SCN-Bimane	T1	Target Compound	9	4	2.23	2.25	0.02		M+	-0.158	N/A	-0.158	N/A	111	111	.000 (mmu)	0.002	1	1996	Method	True	False	N/A	N/A	N/A			Pass	Fail	N/A	N/A	N/A	Identified	N/A
108	Processed	190522-108		Unknown		1107									SCN-Bimane	T1C1	Target Compound	13	10	2.25	2.25	0.00		M+	N/A	N/A	N/A	N/A	124.1	124.1	-.002 (mmu)	0.002	N/A	N/A	Method	True	False	N/A	N/A	N/A			Pass	Fail	N/A	N/A	N/A	Identified	N/A
108	Processed	190522-108		Unknown		1107									SCN-Bimane IS	T1	Internal Standard	779	1996	2.24	2.23	-0.01		M+	1	1	1	N/A	111	111	.000 (mmu)	N/A	N/A	N/A	Method	True	False	N/A	N/A	N/A			Pass	Pass	N/A	N/A	N/A	Confirmed	N/A
108	Processed	190522-108		Unknown		1107									SCN-Bimane IS	T1C1	Internal Standard	393	1317	2.23	2.23	0.00		M+	N/A	N/A	N/A	N/A	126.1	126.1	-.002 (mmu)	N/A	N/A	N/A	Method	True	False	N/A	N/A	N/A			Pass	Pass	N/A	N/A	N/A	Confirmed	N/A
109	Processed	190522-109		Unknown		1108									SCN-Bimane	T1	Target Compound	2	1	2.23	2.22	-0.01		M+	-0.195	N/A	-0.195	N/A	111	111	.000 (mmu)	0	1	2533	Method	True	False	N/A	N/A	N/A			Pass	Fail	N/A	N/A	N/A	Identified	N/A
109	Processed	190522-109		Unknown		1108									SCN-Bimane	T1C1	Target Compound	36	21	2.22	2.21	0.01		M+	N/A	N/A	N/A	N/A	124.1	124.1	-.002 (mmu)	0	N/A	N/A	Method	True	False	N/A	N/A	N/A			Pass	Fail	N/A	N/A	N/A	Identified	N/A
109	Processed	190522-109		Unknown		1108									SCN-Bimane IS	T1	Internal Standard	1108	2533	2.24	2.24	0.00		M+	1	1	1	N/A	111	111	.000 (mmu)	N/A	N/A	N/A	Method	True	False	N/A	N/A	N/A			Pass	Fail	N/A	N/A	N/A	Identified	N/A
109	Processed	190522-109		Unknown		1108									SCN-Bimane IS	T1C1	Internal Standard	606	2418	2.24	2.23	0.00		M+	N/A	N/A	N/A	N/A	126.1	126.1	-.002 (mmu)	N/A	N/A	N/A	Method	True	False	N/A	N/A	N/A			Pass	Fail	N/A	N/A	N/A	Identified	N/A
110	Processed	190522-110		Unknown		1109									SCN-Bimane	T1	Target Compound	2	1	2.23	2.25	0.02		M+	-0.188	N/A	-0.188	N/A	111	111	.000 (mmu)	0.001	1	1655	Method	True	False	N/A	N/A	N/A			Pass	Fail	N/A	N/A	N/A	Identified	N/A
110	Processed	190522-110		Unknown		1109									SCN-Bimane	T1C1	Target Compound	17	12	2.25	2.25	0.00		M+	N/A	N/A	N/A	N/A	124.1	124.1	-.002 (mmu)	0.001	N/A	N/A	Method	True	False	N/A	N/A	N/A			Pass	Fail	N/A	N/A	N/A	Identified	N/A
110	Processed	190522-110		Unknown		1109									SCN-Bimane IS	T1	Internal Standard	638	1655	2.24	2.24	0.00		M+	1	1	1	N/A	111	111	.000 (mmu)	N/A	N/A	N/A	Method	True	False	N/A	N/A	N/A			Pass	Fail	N/A	N/A	N/A	Identified	N/A
110	Processed	190522-110		Unknown		1109									SCN-Bimane IS	T1C1	Internal Standard	419	1453	2.24	2.24	0.00		M+	N/A	N/A	N/A	N/A	126.1	126.1	-.002 (mmu)	N/A	N/A	N/A	Method	True	False	N/A	N/A	N/A			Pass	Fail	N/A	N/A	N/A	Identified	N/A
111	Processed	190522-111		Unknown		1110									SCN-Bimane	T1	Target Compound	20	10	2.23	2.24	0.01		M+	-0.08	N/A	-0.08	N/A	111	111	.000 (mmu)	0.005	1	1913	Method	True	False	N/A	N/A	N/A			Pass	Fail	N/A	N/A	N/A	Identified	N/A
111	Processed	190522-111		Unknown		1110									SCN-Bimane	T1C1	Target Compound	17	10	2.24	2.24	0.00		M+	N/A	N/A	N/A	N/A	124.1	124.1	-.002 (mmu)	0.005	N/A	N/A	Method	True	False	N/A	N/A	N/A			Pass	Fail	N/A	N/A	N/A	Identified	N/A
111	Processed	190522-111		Unknown		1110									SCN-Bimane IS	T1	Internal Standard	780	1913	2.24	2.24	0.00		M+	1	1	1	N/A	111	111	.000 (mmu)	N/A	N/A	N/A	Method	True	False	N/A	N/A	N/A			Pass	Fail	N/A	N/A	N/A	Identified	N/A
111	Processed	190522-111		Unknown		1110									SCN-Bimane IS	T1C1	Internal Standard	439	1007	2.24	2.24	0.00		M+	N/A	N/A	N/A	N/A	126.1	126.1	-.002 (mmu)	N/A	N/A	N/A	Method	True	False	N/A	N/A	N/A			Pass	Fail	N/A	N/A	N/A	Identified	N/A
112	Processed	190522-112		Unknown		1111									SCN-Bimane	T1	Target Compound	37	25	2.23	2.24	0.01		M+	0.399	N/A	0.399	N/A	111	111	.000 (mmu)	0.026	1	943	Method	True	False	N/A	N/A	N/A			Pass	Fail	N/A	N/A	N/A	Identified	N/A
112	Processed	190522-112		Unknown		1111									SCN-Bimane	T1C1	Target Compound	18	17	2.24	2.28	-0.04		M+	N/A	N/A	N/A	N/A	124.1	124.1	-.002 (mmu)	0.026	N/A	N/A	Method	True	False	N/A	N/A	N/A			Pass	Fail	N/A	N/A	N/A	Identified	N/A
112	Processed	190522-112		Unknown		1111									SCN-Bimane IS	T1	Internal Standard	415	943	2.24	2.24	0.00		M+	1	1	1	N/A	111	111	.000 (mmu)	N/A	N/A	N/A	Method	True	False	N/A	N/A	N/A			Pass	Fail	N/A	N/A	N/A	Identified	N/A
112	Processed	190522-112		Unknown		1111									SCN-Bimane IS	T1C1	Internal Standard	392	1060	2.24	2.24	0.00		M+	N/A	N/A	N/A	N/A	126.1	126.1	-.002 (mmu)	N/A	N/A	N/A	Method	True	False	N/A	N/A	N/A			Pass	Fail	N/A	N/A	N/A	Identified	N/A
113	Processed	190522-113		Unknown		1112									SCN-Bimane	T1	Target Compound	0	0	2.23	2.21	-0.02		M+	-0.199	N/A	-0.199	N/A	111	111	.000 (mmu)	0	1	765	Method	True	False	N/A	N/A	N/A			Pass	Fail	N/A	N/A	N/A	Identified	N/A
113	Processed	190522-113		Unknown		1112									SCN-Bimane	T1C1	Target Compound	N/F	N/F	2.21	N/A	N/A		M+	N/A	N/A	N/A	N/A	124.1	N/F	N/A	0	N/A	N/A	Method	True	False	N/A	N/A	N/A			Fail	Fail	N/A	N/A	N/A	NotFound	N/A
113	Processed	190522-113		Unknown		1112									SCN-Bimane IS	T1	Internal Standard	319	765	2.24	2.23	-0.01		M+	1	1	1	N/A	111	111	.000 (mmu)	N/A	N/A	N/A	Method	True	False	N/A	N/A	N/A			Pass	Pass	N/A	N/A	N/A	Confirmed	N/A
113	Processed	190522-113		Unknown		1112									SCN-Bimane IS	T1C1	Internal Standard	204	568	2.23	2.24	-0.01		M+	N/A	N/A	N/A	N/A	126.1	126.1	-.002 (mmu)	N/A	N/A	N/A	Method	True	False	N/A	N/A	N/A			Pass	Pass	N/A	N/A	N/A	Confirmed	N/A
114	Processed	190522-114		Unknown		1113									SCN-Bimane	T1	Target Compound	12	9	2.23	2.17	-0.06		M+	-0.021	N/A	-0.021	N/A	111	111	.000 (mmu)	0.008	1	1163	Method	True	False	N/A	N/A	N/A			Pass	Fail	N/A	N/A	N/A	Identified	N/A
114	Processed	190522-114		Unknown		1113									SCN-Bimane	T1C1	Target Compound	4	2	2.17	2.24	-0.06		M+	N/A	N/A	N/A	N/A	124.1	124.1	-.002 (mmu)	0.008	N/A	N/A	Method	True	False	N/A	N/A	N/A			Pass	Fail	N/A	N/A	N/A	Identified	N/A
114	Processed	190522-114		Unknown		1113									SCN-Bimane IS	T1	Internal Standard	712	1163	2.24	2.23	-0.01		M+	1	1	1	N/A	111	111	.000 (mmu)	N/A	N/A	N/A	Method	True	False	N/A	N/A	N/A			Pass	Fail	N/A	N/A	N/A	Identified	N/A
114	Processed	190522-114		Unknown		1113									SCN-Bimane IS	T1C1	Internal Standard	342	1013	2.23	2.23	0.00		M+	N/A	N/A	N/A	N/A	126.1	126.1	-.002 (mmu)	N/A	N/A	N/A	Method	True	False	N/A	N/A	N/A			Pass	Fail	N/A	N/A	N/A	Identified	N/A
115	Processed	190522-115		Unknown		1114									SCN-Bimane	T1	Target Compound	N/F	N/F	2.23	N/F	N/F		N/A	N/F	N/A	N/F	N/A	111	N/F	N/F	N/F	1	1118	Method	True	False	N/A	N/A	N/A			Fail	N/A	N/A	N/A	N/A	NotFound	N/A
115	Processed	190522-115		Unknown		1114									SCN-Bimane	T1C1	Target Compound	N/F	N/F	0	N/A	N/A		M+	N/A	N/A	N/A	N/A	124.1	N/F	N/A	N/F	N/A	N/A	Method	True	False	N/A	N/A	N/A			Fail	N/A	N/A	N/A	N/A	NotFound	N/A
115	Processed	190522-115		Unknown		1114									SCN-Bimane IS	T1	Internal Standard	479	1118	2.24	2.23	-0.01		M+	1	1	1	N/A	111	111	.000 (mmu)	N/A	N/A	N/A	Method	True	False	N/A	N/A	N/A			Pass	Fail	N/A	N/A	N/A	Identified	N/A
115	Processed	190522-115		Unknown		1114									SCN-Bimane IS	T1C1	Internal Standard	382	1206	2.23	2.23	0.00		M+	N/A	N/A	N/A	N/A	126.1	126.1	-.002 (mmu)	N/A	N/A	N/A	Method	True	False	N/A	N/A	N/A			Pass	Fail	N/A	N/A	N/A	Identified	N/A
116	Processed	190522-116		Unknown		1115									SCN-Bimane	T1	Target Compound	11	6	2.23	2.24	0.01		M+	-0.027	N/A	-0.027	N/A	111	111	.000 (mmu)	0.008	1	829	Method	True	False	N/A	N/A	N/A			Pass	Fail	N/A	N/A	N/A	Identified	N/A
116	Processed	190522-116		Unknown		1115									SCN-Bimane	T1C1	Target Compound	N/F	N/F	2.24	N/A	N/A		M+	N/A	N/A	N/A	N/A	124.1	N/F	N/A	0.008	N/A	N/A	Method	True	False	N/A	N/A	N/A			Fail	Fail	N/A	N/A	N/A	NotFound	N/A
116	Processed	190522-116		Unknown		1115									SCN-Bimane IS	T1	Internal Standard	315	829	2.24	2.24	0.00		M+	1	1	1	N/A	111	111	.000 (mmu)	N/A	N/A	N/A	Method	True	False	N/A	N/A	N/A			Pass	Fail	N/A	N/A	N/A	Identified	N/A
116	Processed	190522-116		Unknown		1115									SCN-Bimane IS	T1C1	Internal Standard	231	723	2.24	2.24	0.00		M+	N/A	N/A	N/A	N/A	126.1	126.1	-.002 (mmu)	N/A	N/A	N/A	Method	True	False	N/A	N/A	N/A			Pass	Fail	N/A	N/A	N/A	Identified	N/A
117	Processed	190522-117		Unknown		1116									SCN-Bimane	T1	Target Compound	7	3	2.23	2.24	0.01		M+	-0.157	N/A	-0.157	N/A	111	111	.000 (mmu)	0.002	1	1427	Method	True	False	N/A	N/A	N/A			Pass	Fail	N/A	N/A	N/A	Identified	N/A
117	Processed	190522-117		Unknown		1116									SCN-Bimane	T1C1	Target Compound	63	85	2.24	2.23	0.01		M+	N/A	N/A	N/A	N/A	124.1	124.1	-.002 (mmu)	0.002	N/A	N/A	Method	True	False	N/A	N/A	N/A			Pass	Fail	N/A	N/A	N/A	Identified	N/A
117	Processed	190522-117		Unknown		1116									SCN-Bimane IS	T1	Internal Standard	636	1427	2.24	2.24	0.00		M+	1	1	1	N/A	111	111	.000 (mmu)	N/A	N/A	N/A	Method	True	False	N/A	N/A	N/A			Pass	Fail	N/A	N/A	N/A	Identified	N/A
117	Processed	190522-117		Unknown		1116									SCN-Bimane IS	T1C1	Internal Standard	424	1499	2.24	2.24	0.00		M+	N/A	N/A	N/A	N/A	126.1	126.1	-.002 (mmu)	N/A	N/A	N/A	Method	True	False	N/A	N/A	N/A			Pass	Fail	N/A	N/A	N/A	Identified	N/A
118	Processed	190522-118		Unknown		1117									SCN-Bimane	T1	Target Compound	0	0	2.23	2.22	-0.01		M+	-0.2	N/A	-0.2	N/A	111	111	.000 (mmu)	0	1	1411	Method	True	False	N/A	N/A	N/A			Pass	Fail	N/A	N/A	N/A	Identified	N/A
118	Processed	190522-118		Unknown		1117									SCN-Bimane	T1C1	Target Compound	18	13	2.22	2.23	-0.02		M+	N/A	N/A	N/A	N/A	124.1	124.1	-.002 (mmu)	0	N/A	N/A	Method	True	False	N/A	N/A	N/A			Pass	Fail	N/A	N/A	N/A	Identified	N/A
118	Processed	190522-118		Unknown		1117									SCN-Bimane IS	T1	Internal Standard	645	1411	2.24	2.24	0.00		M+	1	1	1	N/A	111	111	.000 (mmu)	N/A	N/A	N/A	Method	True	False	N/A	N/A	N/A			Pass	Fail	N/A	N/A	N/A	Identified	N/A
118	Processed	190522-118		Unknown		1117									SCN-Bimane IS	T1C1	Internal Standard	381	1326	2.24	2.24	0.00		M+	N/A	N/A	N/A	N/A	126.1	126.1	-.002 (mmu)	N/A	N/A	N/A	Method	True	False	N/A	N/A	N/A			Pass	Fail	N/A	N/A	N/A	Identified	N/A
119	Processed	190522-119		Unknown		1118									SCN-Bimane	T1	Target Compound	11	5	2.23	2.29	0.06		M+	-0.067	N/A	-0.067	N/A	111	111	.000 (mmu)	0.006	1	769	Method	True	False	N/A	N/A	N/A			Pass	Fail	N/A	N/A	N/A	Identified	N/A
119	Processed	190522-119		Unknown		1118									SCN-Bimane	T1C1	Target Compound	2	1	2.29	2.19	0.10		M+	N/A	N/A	N/A	N/A	124.1	124.1	-.002 (mmu)	0.006	N/A	N/A	Method	True	False	N/A	N/A	N/A			Pass	Fail	N/A	N/A	N/A	Identified	N/A
119	Processed	190522-119		Unknown		1118									SCN-Bimane IS	T1	Internal Standard	280	769	2.24	2.24	0.00		M+	1	1	1	N/A	111	111	.000 (mmu)	N/A	N/A	N/A	Method	True	False	N/A	N/A	N/A			Pass	Pass	N/A	N/A	N/A	Confirmed	N/A
119	Processed	190522-119		Unknown		1118									SCN-Bimane IS	T1C1	Internal Standard	240	582	2.24	2.25	0.00		M+	N/A	N/A	N/A	N/A	126.1	126.1	-.002 (mmu)	N/A	N/A	N/A	Method	True	False	N/A	N/A	N/A			Pass	Pass	N/A	N/A	N/A	Confirmed	N/A
120	Processed	190522-120		Unknown		1119									SCN-Bimane	T1	Target Compound	1	0	2.23	2.25	0.02		M+	-0.194	N/A	-0.194	N/A	111	111	.000 (mmu)	0	1	1603	Method	True	False	N/A	N/A	N/A			Pass	Fail	N/A	N/A	N/A	Identified	N/A
120	Processed	190522-120		Unknown		1119									SCN-Bimane	T1C1	Target Compound	21	22	2.25	2.24	0.01		M+	N/A	N/A	N/A	N/A	124.1	124.1	-.002 (mmu)	0	N/A	N/A	Method	True	False	N/A	N/A	N/A			Pass	Fail	N/A	N/A	N/A	Identified	N/A
120	Processed	190522-120		Unknown		1119									SCN-Bimane IS	T1	Internal Standard	636	1603	2.24	2.23	-0.01		M+	1	1	1	N/A	111	111	.000 (mmu)	N/A	N/A	N/A	Method	True	False	N/A	N/A	N/A			Pass	Fail	N/A	N/A	N/A	Identified	N/A
120	Processed	190522-120		Unknown		1119									SCN-Bimane IS	T1C1	Internal Standard	412	1665	2.23	2.24	0.00		M+	N/A	N/A	N/A	N/A	126.1	126.1	-.002 (mmu)	N/A	N/A	N/A	Method	True	False	N/A	N/A	N/A			Pass	Fail	N/A	N/A	N/A	Identified	N/A
121	Processed	190522-121		Unknown		1120									SCN-Bimane	T1	Target Compound	1	0	2.23	2.31	0.08		M+	-0.187	N/A	-0.187	N/A	111	111	.000 (mmu)	0.001	1	765	Method	True	False	N/A	N/A	N/A			Pass	Fail	N/A	N/A	N/A	Identified	N/A
121	Processed	190522-121		Unknown		1120									SCN-Bimane	T1C1	Target Compound	7	3	2.31	2.28	0.03		M+	N/A	N/A	N/A	N/A	124.1	124.1	-.002 (mmu)	0.001	N/A	N/A	Method	True	False	N/A	N/A	N/A			Pass	Fail	N/A	N/A	N/A	Identified	N/A
121	Processed	190522-121		Unknown		1120									SCN-Bimane IS	T1	Internal Standard	336	765	2.24	2.23	-0.01		M+	1	1	1	N/A	111	111	.000 (mmu)	N/A	N/A	N/A	Method	True	False	N/A	N/A	N/A			Pass	Pass	N/A	N/A	N/A	Confirmed	N/A
121	Processed	190522-121		Unknown		1120									SCN-Bimane IS	T1C1	Internal Standard	215	479	2.23	2.23	0.01		M+	N/A	N/A	N/A	N/A	126.1	126.1	-.002 (mmu)	N/A	N/A	N/A	Method	True	False	N/A	N/A	N/A			Pass	Pass	N/A	N/A	N/A	Confirmed	N/A
122	Processed	190522-122		Unknown		1121									SCN-Bimane	T1	Target Compound	33	23	2.23	2.25	0.02		M+	0.455	N/A	0.455	N/A	111	111	.000 (mmu)	0.029	1	812	Method	True	False	N/A	N/A	N/A			Pass	Fail	N/A	N/A	N/A	Identified	N/A
122	Processed	190522-122		Unknown		1121									SCN-Bimane	T1C1	Target Compound	0	0	2.25	2.26	-0.01		M+	N/A	N/A	N/A	N/A	124.1	124.1	-.002 (mmu)	0.029	N/A	N/A	Method	True	False	N/A	N/A	N/A			Pass	Fail	N/A	N/A	N/A	Identified	N/A
122	Processed	190522-122		Unknown		1121									SCN-Bimane IS	T1	Internal Standard	365	812	2.24	2.24	0.00		M+	1	1	1	N/A	111	111	.000 (mmu)	N/A	N/A	N/A	Method	True	False	N/A	N/A	N/A			Pass	Fail	N/A	N/A	N/A	Identified	N/A
122	Processed	190522-122		Unknown		1121									SCN-Bimane IS	T1C1	Internal Standard	208	698	2.24	2.22	0.02		M+	N/A	N/A	N/A	N/A	126.1	126.1	-.002 (mmu)	N/A	N/A	N/A	Method	True	False	N/A	N/A	N/A			Pass	Fail	N/A	N/A	N/A	Identified	N/A
123	Processed	190522-123		Unknown		1122									SCN-Bimane	T1	Target Compound	0	0	2.23	2.22	-0.01		M+	-0.2	N/A	-0.2	N/A	111	111	.000 (mmu)	0	1	1029	Method	True	False	N/A	N/A	N/A			Pass	Fail	N/A	N/A	N/A	Identified	N/A
123	Processed	190522-123		Unknown		1122									SCN-Bimane	T1C1	Target Compound	27	19	2.22	2.2	0.02		M+	N/A	N/A	N/A	N/A	124.1	124.1	-.002 (mmu)	0	N/A	N/A	Method	True	False	N/A	N/A	N/A			Pass	Fail	N/A	N/A	N/A	Identified	N/A
123	Processed	190522-123		Unknown		1122									SCN-Bimane IS	T1	Internal Standard	473	1029	2.24	2.23	-0.01		M+	1	1	1	N/A	111	111	.000 (mmu)	N/A	N/A	N/A	Method	True	False	N/A	N/A	N/A			Pass	Fail	N/A	N/A	N/A	Identified	N/A
123	Processed	190522-123		Unknown		1122									SCN-Bimane IS	T1C1	Internal Standard	285	853	2.23	2.23	0.00		M+	N/A	N/A	N/A	N/A	126.1	126.1	-.002 (mmu)	N/A	N/A	N/A	Method	True	False	N/A	N/A	N/A			Pass	Fail	N/A	N/A	N/A	Identified	N/A
124	Processed	190522-124		Unknown		1123									SCN-Bimane	T1	Target Compound	N/F	N/F	2.23	N/F	N/F		N/A	N/F	N/A	N/F	N/A	111	N/F	N/F	N/F	1	911	Method	True	False	N/A	N/A	N/A			Fail	N/A	N/A	N/A	N/A	NotFound	N/A
124	Processed	190522-124		Unknown		1123									SCN-Bimane	T1C1	Target Compound	N/F	N/F	0	N/A	N/A		M+	N/A	N/A	N/A	N/A	124.1	N/F	N/A	N/F	N/A	N/A	Method	True	False	N/A	N/A	N/A			Fail	N/A	N/A	N/A	N/A	NotFound	N/A
124	Processed	190522-124		Unknown		1123									SCN-Bimane IS	T1	Internal Standard	345	911	2.24	2.23	-0.01		M+	1	1	1	N/A	111	111	.000 (mmu)	N/A	N/A	N/A	Method	True	False	N/A	N/A	N/A			Pass	Fail	N/A	N/A	N/A	Identified	N/A
124	Processed	190522-124		Unknown		1123									SCN-Bimane IS	T1C1	Internal Standard	246	839	2.23	2.23	-0.01		M+	N/A	N/A	N/A	N/A	126.1	126.1	-.002 (mmu)	N/A	N/A	N/A	Method	True	False	N/A	N/A	N/A			Pass	Fail	N/A	N/A	N/A	Identified	N/A
125	Processed	190522-125		Unknown		1124									SCN-Bimane	T1	Target Compound	73	52	2.23	2.23	0.00		M+	0.713	N/A	0.713	N/A	111	111	.000 (mmu)	0.04	1	1303	Method	True	False	N/A	N/A	N/A			Pass	Fail	N/A	N/A	N/A	Identified	N/A
125	Processed	190522-125		Unknown		1124									SCN-Bimane	T1C1	Target Compound	38	124	2.23	2.2	0.03		M+	N/A	N/A	N/A	N/A	124.1	124.1	-.002 (mmu)	0.04	N/A	N/A	Method	True	False	N/A	N/A	N/A			Pass	Fail	N/A	N/A	N/A	Identified	N/A
125	Processed	190522-125		Unknown		1124									SCN-Bimane IS	T1	Internal Standard	536	1303	2.24	2.24	0.00		M+	1	1	1	N/A	111	111	.000 (mmu)	N/A	N/A	N/A	Method	True	False	N/A	N/A	N/A			Pass	Fail	N/A	N/A	N/A	Identified	N/A
125	Processed	190522-125		Unknown		1124									SCN-Bimane IS	T1C1	Internal Standard	338	1357	2.24	2.24	0.00		M+	N/A	N/A	N/A	N/A	126.1	126.1	-.002 (mmu)	N/A	N/A	N/A	Method	True	False	N/A	N/A	N/A			Pass	Fail	N/A	N/A	N/A	Identified	N/A
126	Processed	190522-126		Unknown		1125									SCN-Bimane	T1	Target Compound	6	2	2.23	2.24	0.01		M+	-0.114	N/A	-0.114	N/A	111	111	.000 (mmu)	0.004	1	646	Method	True	False	N/A	N/A	N/A			Pass	Fail	N/A	N/A	N/A	Identified	N/A
126	Processed	190522-126		Unknown		1125									SCN-Bimane	T1C1	Target Compound	28	14	2.24	2.23	0.01		M+	N/A	N/A	N/A	N/A	124.1	124.1	-.002 (mmu)	0.004	N/A	N/A	Method	True	False	N/A	N/A	N/A			Pass	Fail	N/A	N/A	N/A	Identified	N/A
126	Processed	190522-126		Unknown		1125									SCN-Bimane IS	T1	Internal Standard	305	646	2.24	2.24	0.00		M+	1	1	1	N/A	111	111	.000 (mmu)	N/A	N/A	N/A	Method	True	False	N/A	N/A	N/A			Pass	Fail	N/A	N/A	N/A	Identified	N/A
126	Processed	190522-126		Unknown		1125									SCN-Bimane IS	T1C1	Internal Standard	254	819	2.24	2.23	0.01		M+	N/A	N/A	N/A	N/A	126.1	126.1	-.002 (mmu)	N/A	N/A	N/A	Method	True	False	N/A	N/A	N/A			Pass	Fail	N/A	N/A	N/A	Identified	N/A
127	Processed	190522-127		Unknown		1126									SCN-Bimane	T1	Target Compound	11	5	2.23	2.24	0.01		M+	-0.086	N/A	-0.086	N/A	111	111	.000 (mmu)	0.005	1	940	Method	True	False	N/A	N/A	N/A			Pass	Fail	N/A	N/A	N/A	Identified	N/A
127	Processed	190522-127		Unknown		1126									SCN-Bimane	T1C1	Target Compound	20	20	2.24	2.25	-0.01		M+	N/A	N/A	N/A	N/A	124.1	124.1	-.002 (mmu)	0.005	N/A	N/A	Method	True	False	N/A	N/A	N/A			Pass	Fail	N/A	N/A	N/A	Identified	N/A
127	Processed	190522-127		Unknown		1126									SCN-Bimane IS	T1	Internal Standard	364	940	2.24	2.23	-0.01		M+	1	1	1	N/A	111	111	.000 (mmu)	N/A	N/A	N/A	Method	True	False	N/A	N/A	N/A			Pass	Fail	N/A	N/A	N/A	Identified	N/A
127	Processed	190522-127		Unknown		1126									SCN-Bimane IS	T1C1	Internal Standard	296	1138	2.23	2.24	-0.01		M+	N/A	N/A	N/A	N/A	126.1	126.1	-.002 (mmu)	N/A	N/A	N/A	Method	True	False	N/A	N/A	N/A			Pass	Fail	N/A	N/A	N/A	Identified	N/A
128	Processed	190522-128		Unknown		1127									SCN-Bimane	T1	Target Compound	0	0	2.23	2.21	-0.02		M+	-0.2	N/A	-0.2	N/A	111	111	.000 (mmu)	0	1	724	Method	True	False	N/A	N/A	N/A			Pass	Fail	N/A	N/A	N/A	Identified	N/A
128	Processed	190522-128		Unknown		1127									SCN-Bimane	T1C1	Target Compound	27	15	2.21	2.22	0.00		M+	N/A	N/A	N/A	N/A	124.1	124.1	-.002 (mmu)	0	N/A	N/A	Method	True	False	N/A	N/A	N/A			Pass	Fail	N/A	N/A	N/A	Identified	N/A
128	Processed	190522-128		Unknown		1127									SCN-Bimane IS	T1	Internal Standard	325	724	2.24	2.23	-0.01		M+	1	1	1	N/A	111	111	.000 (mmu)	N/A	N/A	N/A	Method	True	False	N/A	N/A	N/A			Pass	Fail	N/A	N/A	N/A	Identified	N/A
128	Processed	190522-128		Unknown		1127									SCN-Bimane IS	T1C1	Internal Standard	233	723	2.23	2.23	0.00		M+	N/A	N/A	N/A	N/A	126.1	126.1	-.002 (mmu)	N/A	N/A	N/A	Method	True	False	N/A	N/A	N/A			Pass	Fail	N/A	N/A	N/A	Identified	N/A
129	Processed	190522-129		Unknown		M1019									SCN-Bimane	T1	Target Compound	3235	8875	2.23	2.23	0.00		M+	128.556	N/A	128.556	N/A	111	111	.000 (mmu)	5.673	1	1564	Method	True	False	N/A	N/A	N/A			Pass	Pass	N/A	N/A	N/A	Confirmed	N/A
129	Processed	190522-129		Unknown		M1019									SCN-Bimane	T1C1	Target Compound	1570	4013	2.23	2.23	-0.01		M+	N/A	N/A	N/A	N/A	124.1	124.1	-.002 (mmu)	5.673	N/A	N/A	Method	True	False	N/A	N/A	N/A			Pass	Pass	N/A	N/A	N/A	Confirmed	N/A
129	Processed	190522-129		Unknown		M1019									SCN-Bimane IS	T1	Internal Standard	620	1564	2.24	2.23	-0.01		M+	1	1	1	N/A	111	111	.000 (mmu)	N/A	N/A	N/A	Method	True	False	N/A	N/A	N/A			Pass	Pass	N/A	N/A	N/A	Confirmed	N/A
129	Processed	190522-129		Unknown		M1019									SCN-Bimane IS	T1C1	Internal Standard	267	932	2.23	2.24	-0.01		M+	N/A	N/A	N/A	N/A	126.1	126.1	-.002 (mmu)	N/A	N/A	N/A	Method	True	False	N/A	N/A	N/A			Pass	Pass	N/A	N/A	N/A	Confirmed	N/A
130	Processed	190522-130		Unknown		M1018									SCN-Bimane	T1	Target Compound	3443	8524	2.23	2.23	0.00		M+	111.791	N/A	111.791	N/A	111	111	.000 (mmu)	4.935	1	1727	Method	True	False	N/A	N/A	N/A			Pass	Pass	N/A	N/A	N/A	Confirmed	N/A
130	Processed	190522-130		Unknown		M1018									SCN-Bimane	T1C1	Target Compound	1528	4132	2.23	2.23	0.00		M+	N/A	N/A	N/A	N/A	124.1	124.1	-.002 (mmu)	4.935	N/A	N/A	Method	True	False	N/A	N/A	N/A			Pass	Pass	N/A	N/A	N/A	Confirmed	N/A
130	Processed	190522-130		Unknown		M1018									SCN-Bimane IS	T1	Internal Standard	721	1727	2.24	2.24	0.00		M+	1	1	1	N/A	111	111	.000 (mmu)	N/A	N/A	N/A	Method	True	False	N/A	N/A	N/A			Pass	Pass	N/A	N/A	N/A	Confirmed	N/A
130	Processed	190522-130		Unknown		M1018									SCN-Bimane IS	T1C1	Internal Standard	369	937	2.24	2.23	0.01		M+	N/A	N/A	N/A	N/A	126.1	126.1	-.002 (mmu)	N/A	N/A	N/A	Method	True	False	N/A	N/A	N/A			Pass	Pass	N/A	N/A	N/A	Confirmed	N/A
131	Processed	190522-131		Unknown		M1017									SCN-Bimane	T1	Target Compound	4650	12124	2.23	2.23	0.00		M+	127.235	N/A	127.235	N/A	111	111	.000 (mmu)	5.615	1	2159	Method	True	False	N/A	N/A	N/A			Pass	Pass	N/A	N/A	N/A	Confirmed	N/A
131	Processed	190522-131		Unknown		M1017									SCN-Bimane	T1C1	Target Compound	2185	5543	2.23	2.23	0.00		M+	N/A	N/A	N/A	N/A	124.1	124.1	-.002 (mmu)	5.615	N/A	N/A	Method	True	False	N/A	N/A	N/A			Pass	Pass	N/A	N/A	N/A	Confirmed	N/A
131	Processed	190522-131		Unknown		M1017									SCN-Bimane IS	T1	Internal Standard	830	2159	2.24	2.23	-0.01		M+	1	1	1	N/A	111	111	.000 (mmu)	N/A	N/A	N/A	Method	True	False	N/A	N/A	N/A			Pass	Fail	N/A	N/A	N/A	Identified	N/A
131	Processed	190522-131		Unknown		M1017									SCN-Bimane IS	T1C1	Internal Standard	389	1117	2.23	2.21	0.02		M+	N/A	N/A	N/A	N/A	126.1	126.1	-.002 (mmu)	N/A	N/A	N/A	Method	True	False	N/A	N/A	N/A			Pass	Fail	N/A	N/A	N/A	Identified	N/A
132	Processed	190522-132		Matrix Blank		0ppb									SCN-Bimane	T1	Target Compound	24	13	2.23	2.16	-0.07		M+	-0.047	N/A	-0.047	N/A	111	111	.000 (mmu)	0.007	1	1934	Method	True	False	N/A	N/A	N/A			Pass	Fail	N/A	N/A	N/A	Identified	N/A
132	Processed	190522-132		Matrix Blank		0ppb									SCN-Bimane	T1C1	Target Compound	1	0	2.16	2.15	0.01		M+	N/A	N/A	N/A	N/A	124.1	124.1	-.002 (mmu)	0.007	N/A	N/A	Method	True	False	N/A	N/A	N/A			Pass	Fail	N/A	N/A	N/A	Identified	N/A
132	Processed	190522-132		Matrix Blank		0ppb									SCN-Bimane IS	T1	Internal Standard	814	1934	2.24	2.24	0.00		M+	1	1	1	N/A	111	111	.000 (mmu)	N/A	N/A	N/A	Method	True	False	N/A	N/A	N/A			Pass	Pass	N/A	N/A	N/A	Confirmed	N/A
132	Processed	190522-132		Matrix Blank		0ppb									SCN-Bimane IS	T1C1	Internal Standard	484	1199	2.24	2.23	0.01		M+	N/A	N/A	N/A	N/A	126.1	126.1	-.002 (mmu)	N/A	N/A	N/A	Method	True	False	N/A	N/A	N/A			Pass	Pass	N/A	N/A	N/A	Confirmed	N/A
133	Processed	190522-133		Cal Std	1	5ppb									SCN-Bimane	T1	Target Compound	263	685	2.23	2.24	0.01		M+	4.856	5	4.856	N/A	111	111	.000 (mmu)	0.223	1	3076	Method	True	False	-2.88	N/A	N/A			Pass	Pass	N/A	N/A	N/A	Confirmed	N/A
133	Processed	190522-133		Cal Std	1	5ppb									SCN-Bimane	T1C1	Target Compound	119	389	2.24	2.25	-0.01		M+	N/A	N/A	N/A	N/A	124.1	124.1	-.002 (mmu)	0.223	N/A	N/A	Method	True	False	N/A	N/A	N/A			Pass	Pass	N/A	N/A	N/A	Confirmed	N/A
133	Processed	190522-133		Cal Std	1	5ppb									SCN-Bimane IS	T1	Internal Standard	1125	3076	2.24	2.23	-0.01		M+	1	1	1	N/A	111	111	.000 (mmu)	N/A	N/A	N/A	Method	True	False	0	N/A	N/A			Pass	Fail	N/A	N/A	N/A	Identified	N/A
133	Processed	190522-133		Cal Std	1	5ppb									SCN-Bimane IS	T1C1	Internal Standard	499	1576	2.23	2.24	0.00		M+	N/A	N/A	N/A	N/A	126.1	126.1	-.002 (mmu)	N/A	N/A	N/A	Method	True	False	N/A	N/A	N/A			Pass	Fail	N/A	N/A	N/A	Identified	N/A
134	Processed	190522-134		Cal Std	4	50ppb									SCN-Bimane	T1	Target Compound	2600	6544	2.23	2.23	0.00		M+	52.737	50	52.737	N/A	111	111	.000 (mmu)	2.333	1	2806	Method	True	False	5.47	N/A	N/A			Pass	Pass	N/A	N/A	N/A	Confirmed	N/A
134	Processed	190522-134		Cal Std	4	50ppb									SCN-Bimane	T1C1	Target Compound	1153	2977	2.23	2.24	-0.01		M+	N/A	N/A	N/A	N/A	124.1	124.1	-.002 (mmu)	2.333	N/A	N/A	Method	True	False	N/A	N/A	N/A			Pass	Pass	N/A	N/A	N/A	Confirmed	N/A
134	Processed	190522-134		Cal Std	4	50ppb									SCN-Bimane IS	T1	Internal Standard	1057	2806	2.24	2.24	0.00		M+	1	1	1	N/A	111	111	.000 (mmu)	N/A	N/A	N/A	Method	True	False	0	N/A	N/A			Pass	Pass	N/A	N/A	N/A	Confirmed	N/A
134	Processed	190522-134		Cal Std	4	50ppb									SCN-Bimane IS	T1C1	Internal Standard	580	1558	2.24	2.24	0.00		M+	N/A	N/A	N/A	N/A	126.1	126.1	-.002 (mmu)	N/A	N/A	N/A	Method	True	False	N/A	N/A	N/A			Pass	Pass	N/A	N/A	N/A	Confirmed	N/A
135	Processed	190522-135		Cal Std	6	100ppb									SCN-Bimane	T1	Target Compound	3527	8924	2.23	2.23	0.00		M+	97.407	100	97.407	N/A	111	111	.000 (mmu)	4.301	1	2075	Method	True	False	-2.59	N/A	N/A			Pass	Pass	N/A	N/A	N/A	Confirmed	N/A
135	Processed	190522-135		Cal Std	6	100ppb									SCN-Bimane	T1C1	Target Compound	1600	3917	2.23	2.23	0.00		M+	N/A	N/A	N/A	N/A	124.1	124.1	-.002 (mmu)	4.301	N/A	N/A	Method	True	False	N/A	N/A	N/A			Pass	Pass	N/A	N/A	N/A	Confirmed	N/A
135	Processed	190522-135		Cal Std	6	100ppb									SCN-Bimane IS	T1	Internal Standard	833	2075	2.24	2.23	-0.01		M+	1	1	1	N/A	111	111	.000 (mmu)	N/A	N/A	N/A	Method	True	False	0	N/A	N/A			Pass	Fail	N/A	N/A	N/A	Identified	N/A
135	Processed	190522-135		Cal Std	6	100ppb									SCN-Bimane IS	T1C1	Internal Standard	541	1883	2.23	2.22	0.02		M+	N/A	N/A	N/A	N/A	126.1	126.1	-.002 (mmu)	N/A	N/A	N/A	Method	True	False	N/A	N/A	N/A			Pass	Fail	N/A	N/A	N/A	Identified	N/A
136	Processed	190522-136		Unknown		353									SCN-Bimane	T1	Target Compound	145	246	2.23	2.23	0.00		M+	3.061	N/A	3.061	N/A	111	111	.000 (mmu)	0.144	1	1712	Method	True	False	N/A	N/A	N/A			Pass	Fail	N/A	N/A	N/A	Identified	N/A
136	Processed	190522-136		Unknown		353									SCN-Bimane	T1C1	Target Compound	85	160	2.23	2.22	0.02		M+	N/A	N/A	N/A	N/A	124.1	124.1	-.002 (mmu)	0.144	N/A	N/A	Method	True	False	N/A	N/A	N/A			Pass	Fail	N/A	N/A	N/A	Identified	N/A
136	Processed	190522-136		Unknown		353									SCN-Bimane IS	T1	Internal Standard	668	1712	2.24	2.24	0.00		M+	1	1	1	N/A	111	111	.000 (mmu)	N/A	N/A	N/A	Method	True	False	N/A	N/A	N/A			Pass	Pass	N/A	N/A	N/A	Confirmed	N/A
136	Processed	190522-136		Unknown		353									SCN-Bimane IS	T1C1	Internal Standard	359	1155	2.24	2.22	0.02		M+	N/A	N/A	N/A	N/A	126.1	126.1	-.002 (mmu)	N/A	N/A	N/A	Method	True	False	N/A	N/A	N/A			Pass	Pass	N/A	N/A	N/A	Confirmed	N/A
137	Processed	190522-137		Unknown		354									SCN-Bimane	T1	Target Compound	181	289	2.23	2.23	0.00		M+	3.061	N/A	3.061	N/A	111	111	.000 (mmu)	0.144	1	2009	Method	True	False	N/A	N/A	N/A			Pass	Fail	N/A	N/A	N/A	Identified	N/A
137	Processed	190522-137		Unknown		354									SCN-Bimane	T1C1	Target Compound	117	316	2.23	2.24	-0.01		M+	N/A	N/A	N/A	N/A	124.1	124.1	-.002 (mmu)	0.144	N/A	N/A	Method	True	False	N/A	N/A	N/A			Pass	Fail	N/A	N/A	N/A	Identified	N/A
137	Processed	190522-137		Unknown		354									SCN-Bimane IS	T1	Internal Standard	778	2009	2.24	2.25	0.01		M+	1	1	1	N/A	111	111	.000 (mmu)	N/A	N/A	N/A	Method	True	False	N/A	N/A	N/A			Pass	Pass	N/A	N/A	N/A	Confirmed	N/A
137	Processed	190522-137		Unknown		354									SCN-Bimane IS	T1C1	Internal Standard	426	1298	2.25	2.23	0.01		M+	N/A	N/A	N/A	N/A	126.1	126.1	-.002 (mmu)	N/A	N/A	N/A	Method	True	False	N/A	N/A	N/A			Pass	Pass	N/A	N/A	N/A	Confirmed	N/A
138	Processed	190522-138		Unknown		355									SCN-Bimane	T1	Target Compound	172	322	2.23	2.23	0.00		M+	4.281	N/A	4.281	N/A	111	111	.000 (mmu)	0.197	1	1631	Method	True	False	N/A	N/A	N/A			Pass	Pass	N/A	N/A	N/A	Confirmed	N/A
138	Processed	190522-138		Unknown		355									SCN-Bimane	T1C1	Target Compound	83	157	2.23	2.23	0.01		M+	N/A	N/A	N/A	N/A	124.1	124.1	-.002 (mmu)	0.197	N/A	N/A	Method	True	False	N/A	N/A	N/A			Pass	Pass	N/A	N/A	N/A	Confirmed	N/A
138	Processed	190522-138		Unknown		355									SCN-Bimane IS	T1	Internal Standard	669	1631	2.24	2.24	0.00		M+	1	1	1	N/A	111	111	.000 (mmu)	N/A	N/A	N/A	Method	True	False	N/A	N/A	N/A			Pass	Fail	N/A	N/A	N/A	Identified	N/A
138	Processed	190522-138		Unknown		355									SCN-Bimane IS	T1C1	Internal Standard	471	1688	2.24	2.24	-0.01		M+	N/A	N/A	N/A	N/A	126.1	126.1	-.002 (mmu)	N/A	N/A	N/A	Method	True	False	N/A	N/A	N/A			Pass	Fail	N/A	N/A	N/A	Identified	N/A
139	Processed	190522-139		Unknown		356									SCN-Bimane	T1	Target Compound	159	372	2.23	2.23	0.00		M+	4.62	N/A	4.62	N/A	111	111	.000 (mmu)	0.212	1	1752	Method	True	False	N/A	N/A	N/A			Pass	Pass	N/A	N/A	N/A	Confirmed	N/A
139	Processed	190522-139		Unknown		356									SCN-Bimane	T1C1	Target Compound	90	167	2.23	2.23	0.00		M+	N/A	N/A	N/A	N/A	124.1	124.1	-.002 (mmu)	0.212	N/A	N/A	Method	True	False	N/A	N/A	N/A			Pass	Pass	N/A	N/A	N/A	Confirmed	N/A
139	Processed	190522-139		Unknown		356									SCN-Bimane IS	T1	Internal Standard	677	1752	2.24	2.23	-0.01		M+	1	1	1	N/A	111	111	.000 (mmu)	N/A	N/A	N/A	Method	True	False	N/A	N/A	N/A			Pass	Pass	N/A	N/A	N/A	Confirmed	N/A
139	Processed	190522-139		Unknown		356									SCN-Bimane IS	T1C1	Internal Standard	510	1026	2.23	2.23	0.00		M+	N/A	N/A	N/A	N/A	126.1	126.1	-.002 (mmu)	N/A	N/A	N/A	Method	True	False	N/A	N/A	N/A			Pass	Pass	N/A	N/A	N/A	Confirmed	N/A
140	Processed	190522-140		Unknown		357									SCN-Bimane	T1	Target Compound	137	235	2.23	2.24	0.01		M+	4.45	N/A	4.45	N/A	111	111	.000 (mmu)	0.205	1	1147	Method	True	False	N/A	N/A	N/A			Pass	Pass	N/A	N/A	N/A	Confirmed	N/A
140	Processed	190522-140		Unknown		357									SCN-Bimane	T1C1	Target Compound	59	128	2.24	2.26	-0.01		M+	N/A	N/A	N/A	N/A	124.1	124.1	-.002 (mmu)	0.205	N/A	N/A	Method	True	False	N/A	N/A	N/A			Pass	Pass	N/A	N/A	N/A	Confirmed	N/A
140	Processed	190522-140		Unknown		357									SCN-Bimane IS	T1	Internal Standard	459	1147	2.24	2.24	0.00		M+	1	1	1	N/A	111	111	.000 (mmu)	N/A	N/A	N/A	Method	True	False	N/A	N/A	N/A			Pass	Pass	N/A	N/A	N/A	Confirmed	N/A
140	Processed	190522-140		Unknown		357									SCN-Bimane IS	T1C1	Internal Standard	261	666	2.24	2.23	0.01		M+	N/A	N/A	N/A	N/A	126.1	126.1	-.002 (mmu)	N/A	N/A	N/A	Method	True	False	N/A	N/A	N/A			Pass	Pass	N/A	N/A	N/A	Confirmed	N/A
141	Processed	190522-141		Unknown		358									SCN-Bimane	T1	Target Compound	170	310	2.23	2.23	0.00		M+	4.761	N/A	4.761	N/A	111	111	.000 (mmu)	0.219	1	1417	Method	True	False	N/A	N/A	N/A			Pass	Pass	N/A	N/A	N/A	Confirmed	N/A
141	Processed	190522-141		Unknown		358									SCN-Bimane	T1C1	Target Compound	86	180	2.23	2.22	0.01		M+	N/A	N/A	N/A	N/A	124.1	124.1	-.002 (mmu)	0.219	N/A	N/A	Method	True	False	N/A	N/A	N/A			Pass	Pass	N/A	N/A	N/A	Confirmed	N/A
141	Processed	190522-141		Unknown		358									SCN-Bimane IS	T1	Internal Standard	569	1417	2.24	2.23	-0.01		M+	1	1	1	N/A	111	111	.000 (mmu)	N/A	N/A	N/A	Method	True	False	N/A	N/A	N/A			Pass	Fail	N/A	N/A	N/A	Identified	N/A
141	Processed	190522-141		Unknown		358									SCN-Bimane IS	T1C1	Internal Standard	467	1291	2.23	2.24	-0.01		M+	N/A	N/A	N/A	N/A	126.1	126.1	-.002 (mmu)	N/A	N/A	N/A	Method	True	False	N/A	N/A	N/A			Pass	Fail	N/A	N/A	N/A	Identified	N/A
[truncated: 15 more columns]

## Sheet: Filter
Batch Order	Status	Filename	Group	Sample Type	Level	Sample ID	Sample Name	Comments	ColumnHeader1	ColumnHeader2	ColumnHeader3	ColumnHeader4	ColumnHeader5	ColumnHeader6	Compound	Peak Label	Type	Height	Area	RT	Actual RT	RT Delta	Formula	Adduct	Calculated Amt	Theoretical Amt	Sample Amt	Std Add Amount	m/z (Expected)	m/z (Apex)	m/z (Delta)	Response Ratio	ISTD Amt	ISTD Response	Integration Mode	Active	Excluded	%Diff	%RSD	% CV	Channel	Final Units	PK	IR	IP	LS	FI	Confirm	Isotopic Pattern Score (%)
1	Processed	190522-001		Unknown		1000									SCN-Bimane	T1	Target Compound	76	136	2.23	2.28	0.05		M+	0.805	N/A	0.805	N/A	111	111	.000 (mmu)	0.044	1	3078	Method	True	False	N/A	N/A	N/A			Pass	Fail	N/A	N/A	N/A	Identified	N/A
1	Processed	190522-001		Unknown		1000									SCN-Bimane	T1C1	Target Compound	2	1	2.28	2.27	0.01		M+	N/A	N/A	N/A	N/A	124.1	124.1	-.002 (mmu)	0.044	N/A	N/A	Method	True	False	N/A	N/A	N/A			Pass	Fail	N/A	N/A	N/A	Identified	N/A
1	Processed	190522-001		Unknown		1000									SCN-Bimane IS	T1	Internal Standard	1258	3078	2.24	2.28	0.04		M+	1	1	1	N/A	111	111	.000 (mmu)	N/A	N/A	N/A	Method	True	False	N/A	N/A	N/A			Pass	Fail	N/A	N/A	N/A	Identified	N/A
1	Processed	190522-001		Unknown		1000									SCN-Bimane IS	T1C1	Internal Standard	588	1554	2.28	2.28	0.00		M+	N/A	N/A	N/A	N/A	126.1	126.1	-.002 (mmu)	N/A	N/A	N/A	Method	True	False	N/A	N/A	N/A			Pass	Fail	N/A	N/A	N/A	Identified	N/A
2	Processed	190522-002		Unknown		1001									SCN-Bimane	T1	Target Compound	69	87	2.23	2.23	0.00		M+	0.511	N/A	0.511	N/A	111	111	.000 (mmu)	0.031	1	2778	Method	True	False	N/A	N/A	N/A			Pass	Fail	N/A	N/A	N/A	Identified	N/A
2	Processed	190522-002		Unknown		1001									SCN-Bimane	T1C1	Target Compound	29	22	2.23	2.23	-0.01		M+	N/A	N/A	N/A	N/A	124.1	124.1	-.002 (mmu)	0.031	N/A	N/A	Method	True	False	N/A	N/A	N/A			Pass	Fail	N/A	N/A	N/A	Identified	N/A
2	Processed	190522-002		Unknown		1001									SCN-Bimane IS	T1	Internal Standard	1220	2778	2.24	2.23	-0.01		M+	1	1	1	N/A	111	111	.000 (mmu)	N/A	N/A	N/A	Method	True	False	N/A	N/A	N/A			Pass	Fail	N/A	N/A	N/A	Identified	N/A
2	Processed	190522-002		Unknown		1001									SCN-Bimane IS	T1C1	Internal Standard	615	1362	2.23	2.23	0.01		M+	N/A	N/A	N/A	N/A	126.1	126.1	-.002 (mmu)	N/A	N/A	N/A	Method	True	False	N/A	N/A	N/A			Pass	Fail	N/A	N/A	N/A	Identified	N/A
3	Processed	190522-003		Unknown		1002									SCN-Bimane	T1	Target Compound	27	36	2.23	2.23	0.00		M+	0.08	N/A	0.08	N/A	111	111	.000 (mmu)	0.012	1	2876	Method	True	False	N/A	N/A	N/A			Pass	Fail	N/A	N/A	N/A	Identified	N/A
3	Processed	190522-003		Unknown		1002									SCN-Bimane	T1C1	Target Compound	11	12	2.23	2.23	0.00		M+	N/A	N/A	N/A	N/A	124.1	124.1	-.002 (mmu)	0.012	N/A	N/A	Method	True	False	N/A	N/A	N/A			Pass	Fail	N/A	N/A	N/A	Identified	N/A
3	Processed	190522-003		Unknown		1002									SCN-Bimane IS	T1	Internal Standard	1352	2876	2.24	2.23	-0.01		M+	1	1	1	N/A	111	111	.000 (mmu)	N/A	N/A	N/A	Method	True	False	N/A	N/A	N/A			Pass	Fail	N/A	N/A	N/A	Identified	N/A
3	Processed	190522-003		Unknown		1002									SCN-Bimane IS	T1C1	Internal Standard	627	1415	2.23	2.23	0.00		M+	N/A	N/A	N/A	N/A	126.1	126.1	-.002 (mmu)	N/A	N/A	N/A	Method	True	False	N/A	N/A	N/A			Pass	Fail	N/A	N/A	N/A	Identified	N/A
4	Processed	190522-004		Unknown		1003									SCN-Bimane	T1	Target Compound	22	27	2.23	2.25	0.02		M+	-0.01	N/A	-0.01	N/A	111	111	.000 (mmu)	0.008	1	3250	Method	True	False	N/A	N/A	N/A			Pass	Fail	N/A	N/A	N/A	Identified	N/A
4	Processed	190522-004		Unknown		1003									SCN-Bimane	T1C1	Target Compound	22	22	2.25	2.22	0.03		M+	N/A	N/A	N/A	N/A	124.1	124.1	-.002 (mmu)	0.008	N/A	N/A	Method	True	False	N/A	N/A	N/A			Pass	Fail	N/A	N/A	N/A	Identified	N/A
4	Processed	190522-004		Unknown		1003									SCN-Bimane IS	T1	Internal Standard	1229	3250	2.24	2.23	-0.01		M+	1	1	1	N/A	111	111	.000 (mmu)	N/A	N/A	N/A	Method	True	False	N/A	N/A	N/A			Pass	Pass	N/A	N/A	N/A	Confirmed	N/A
4	Processed	190522-004		Unknown		1003									SCN-Bimane IS	T1C1	Internal Standard	640	2042	2.23	2.22	0.01		M+	N/A	N/A	N/A	N/A	126.1	126.1	-.002 (mmu)	N/A	N/A	N/A	Method	True	False	N/A	N/A	N/A			Pass	Pass	N/A	N/A	N/A	Confirmed	N/A
5	Processed	190522-005		Unknown		1004									SCN-Bimane	T1	Target Compound	13	11	2.23	2.27	0.04		M+	-0.022	N/A	-0.022	N/A	111	111	.000 (mmu)	0.008	1	1362	Method	True	False	N/A	N/A	N/A			Pass	Fail	N/A	N/A	N/A	Identified	N/A
5	Processed	190522-005		Unknown		1004									SCN-Bimane	T1C1	Target Compound	N/F	N/F	2.27	N/A	N/A		M+	N/A	N/A	N/A	N/A	124.1	N/F	N/A	0.008	N/A	N/A	Method	True	False	N/A	N/A	N/A			Fail	Fail	N/A	N/A	N/A	NotFound	N/A
5	Processed	190522-005		Unknown		1004									SCN-Bimane IS	T1	Internal Standard	517	1362	2.24	2.24	0.00		M+	1	1	1	N/A	111	111	.000 (mmu)	N/A	N/A	N/A	Method	True	False	N/A	N/A	N/A			Pass	Pass	N/A	N/A	N/A	Confirmed	N/A
5	Processed	190522-005		Unknown		1004									SCN-Bimane IS	T1C1	Internal Standard	269	817	2.24	2.24	0.01		M+	N/A	N/A	N/A	N/A	126.1	126.1	-.002 (mmu)	N/A	N/A	N/A	Method	True	False	N/A	N/A	N/A			Pass	Pass	N/A	N/A	N/A	Confirmed	N/A
6	Processed	190522-006		Unknown		1005									SCN-Bimane	T1	Target Compound	57	67	2.23	2.22	-0.01		M+	0.404	N/A	0.404	N/A	111	111	.000 (mmu)	0.027	1	2501	Method	True	False	N/A	N/A	N/A			Pass	Fail	N/A	N/A	N/A	Identified	N/A
6	Processed	190522-006		Unknown		1005									SCN-Bimane	T1C1	Target Compound	18	8	2.22	2.23	-0.01		M+	N/A	N/A	N/A	N/A	124.1	124.1	-.002 (mmu)	0.027	N/A	N/A	Method	True	False	N/A	N/A	N/A			Pass	Fail	N/A	N/A	N/A	Identified	N/A
6	Processed	190522-006		Unknown		1005									SCN-Bimane IS	T1	Internal Standard	1017	2501	2.24	2.24	0.00		M+	1	1	1	N/A	111	111	.000 (mmu)	N/A	N/A	N/A	Method	True	False	N/A	N/A	N/A			Pass	Fail	N/A	N/A	N/A	Identified	N/A
6	Processed	190522-006		Unknown		1005									SCN-Bimane IS	T1C1	Internal Standard	446	1293	2.24	2.23	0.01		M+	N/A	N/A	N/A	N/A	126.1	126.1	-.002 (mmu)	N/A	N/A	N/A	Method	True	False	N/A	N/A	N/A			Pass	Fail	N/A	N/A	N/A	Identified	N/A
7	Processed	190522-007		Unknown		1006									SCN-Bimane	T1	Target Compound	28	30	2.23	2.24	0.01		M+	0.119	N/A	0.119	N/A	111	111	.000 (mmu)	0.014	1	2169	Method	True	False	N/A	N/A	N/A			Pass	Fail	N/A	N/A	N/A	Identified	N/A
7	Processed	190522-007		Unknown		1006									SCN-Bimane	T1C1	Target Compound	7	3	2.24	2.25	-0.01		M+	N/A	N/A	N/A	N/A	124.1	124.1	-.002 (mmu)	0.014	N/A	N/A	Method	True	False	N/A	N/A	N/A			Pass	Fail	N/A	N/A	N/A	Identified	N/A
7	Processed	190522-007		Unknown		1006									SCN-Bimane IS	T1	Internal Standard	789	2169	2.24	2.24	0.00		M+	1	1	1	N/A	111	111	.000 (mmu)	N/A	N/A	N/A	Method	True	False	N/A	N/A	N/A			Pass	Fail	N/A	N/A	N/A	Identified	N/A
7	Processed	190522-007		Unknown		1006									SCN-Bimane IS	T1C1	Internal Standard	420	1095	2.24	2.24	0.00		M+	N/A	N/A	N/A	N/A	126.1	126.1	-.002 (mmu)	N/A	N/A	N/A	Method	True	False	N/A	N/A	N/A			Pass	Fail	N/A	N/A	N/A	Identified	N/A
8	Processed	190522-008		Unknown		1007									SCN-Bimane	T1	Target Compound	15	8	2.23	2.25	0.02		M+	-0.082	N/A	-0.082	N/A	111	111	.000 (mmu)	0.005	1	1575	Method	True	False	N/A	N/A	N/A			Pass	Fail	N/A	N/A	N/A	Identified	N/A
8	Processed	190522-008		Unknown		1007									SCN-Bimane	T1C1	Target Compound	3	1	2.25	2.19	0.06		M+	N/A	N/A	N/A	N/A	124.1	124.1	-.002 (mmu)	0.005	N/A	N/A	Method	True	False	N/A	N/A	N/A			Pass	Fail	N/A	N/A	N/A	Identified	N/A
8	Processed	190522-008		Unknown		1007									SCN-Bimane IS	T1	Internal Standard	632	1575	2.24	2.23	-0.01		M+	1	1	1	N/A	111	111	.000 (mmu)	N/A	N/A	N/A	Method	True	False	N/A	N/A	N/A			Pass	Fail	N/A	N/A	N/A	Identified	N/A
8	Processed	190522-008		Unknown		1007									SCN-Bimane IS	T1C1	Internal Standard	301	799	2.23	2.22	0.01		M+	N/A	N/A	N/A	N/A	126.1	126.1	-.002 (mmu)	N/A	N/A	N/A	Method	True	False	N/A	N/A	N/A			Pass	Fail	N/A	N/A	N/A	Identified	N/A
9	Processed	190522-009		Unknown		1008									SCN-Bimane	T1	Target Compound	N/F	N/F	2.23	N/F	N/F		N/A	N/F	N/A	N/F	N/A	111	N/F	N/F	N/F	1	1268	Method	True	False	N/A	N/A	N/A			Fail	N/A	N/A	N/A	N/A	NotFound	N/A
9	Processed	190522-009		Unknown		1008									SCN-Bimane	T1C1	Target Compound	N/F	N/F	0	N/A	N/A		M+	N/A	N/A	N/A	N/A	124.1	N/F	N/A	N/F	N/A	N/A	Method	True	False	N/A	N/A	N/A			Fail	N/A	N/A	N/A	N/A	NotFound	N/A
9	Processed	190522-009		Unknown		1008									SCN-Bimane IS	T1	Internal Standard	514	1268	2.24	2.23	-0.01		M+	1	1	1	N/A	111	111	.000 (mmu)	N/A	N/A	N/A	Method	True	False	N/A	N/A	N/A			Pass	Pass	N/A	N/A	N/A	Confirmed	N/A
9	Processed	190522-009		Unknown		1008									SCN-Bimane IS	T1C1	Internal Standard	288	708	2.23	2.23	0.00		M+	N/A	N/A	N/A	N/A	126.1	126.1	-.002 (mmu)	N/A	N/A	N/A	Method	True	False	N/A	N/A	N/A			Pass	Pass	N/A	N/A	N/A	Confirmed	N/A
10	Processed	190522-010		Unknown		1009									SCN-Bimane	T1	Target Compound	1	0	2.23	2.23	0.00		M+	-0.197	N/A	-0.197	N/A	111	111	.000 (mmu)	0	1	1749	Method	True	False	N/A	N/A	N/A			Pass	Pass	N/A	N/A	N/A	Confirmed	N/A
10	Processed	190522-010		Unknown		1009									SCN-Bimane	T1C1	Target Compound	0	0	2.23	2.21	0.02		M+	N/A	N/A	N/A	N/A	124.1	124.1	-.002 (mmu)	0	N/A	N/A	Method	True	False	N/A	N/A	N/A			Pass	Pass	N/A	N/A	N/A	Confirmed	N/A
10	Processed	190522-010		Unknown		1009									SCN-Bimane IS	T1	Internal Standard	683	1749	2.24	2.23	-0.01		M+	1	1	1	N/A	111	111	.000 (mmu)	N/A	N/A	N/A	Method	True	False	N/A	N/A	N/A			Pass	Pass	N/A	N/A	N/A	Confirmed	N/A
10	Processed	190522-010		Unknown		1009									SCN-Bimane IS	T1C1	Internal Standard	334	1041	2.23	2.23	0.01		M+	N/A	N/A	N/A	N/A	126.1	126.1	-.002 (mmu)	N/A	N/A	N/A	Method	True	False	N/A	N/A	N/A			Pass	Pass	N/A	N/A	N/A	Confirmed	N/A
11	Processed	190522-011		Unknown		1010									SCN-Bimane	T1	Target Compound	N/F	N/F	2.23	N/F	N/F		N/A	N/F	N/A	N/F	N/A	111	N/F	N/F	N/F	1	1003	Method	True	False	N/A	N/A	N/A			Fail	N/A	N/A	N/A	N/A	NotFound	N/A
11	Processed	190522-011		Unknown		1010									SCN-Bimane	T1C1	Target Compound	N/F	N/F	0	N/A	N/A		M+	N/A	N/A	N/A	N/A	124.1	N/F	N/A	N/F	N/A	N/A	Method	True	False	N/A	N/A	N/A			Fail	N/A	N/A	N/A	N/A	NotFound	N/A
11	Processed	190522-011		Unknown		1010									SCN-Bimane IS	T1	Internal Standard	488	1003	2.24	2.24	0.00		M+	1	1	1	N/A	111	111	.000 (mmu)	N/A	N/A	N/A	Method	True	False	N/A	N/A	N/A			Pass	Pass	N/A	N/A	N/A	Confirmed	N/A
11	Processed	190522-011		Unknown		1010									SCN-Bimane IS	T1C1	Internal Standard	295	647	2.24	2.21	0.02		M+	N/A	N/A	N/A	N/A	126.1	126.1	-.002 (mmu)	N/A	N/A	N/A	Method	True	False	N/A	N/A	N/A			Pass	Pass	N/A	N/A	N/A	Confirmed	N/A
12	Processed	190522-012		Unknown		1011									SCN-Bimane	T1	Target Compound	17	10	2.23	2.23	0.00		M+	-0.116	N/A	-0.116	N/A	111	111	.000 (mmu)	0.004	1	2668	Method	True	False	N/A	N/A	N/A			Pass	Fail	N/A	N/A	N/A	Identified	N/A
12	Processed	190522-012		Unknown		1011									SCN-Bimane	T1C1	Target Compound	0	0	2.23	2.21	0.01		M+	N/A	N/A	N/A	N/A	124.1	124.1	-.002 (mmu)	0.004	N/A	N/A	Method	True	False	N/A	N/A	N/A			Pass	Fail	N/A	N/A	N/A	Identified	N/A
12	Processed	190522-012		Unknown		1011									SCN-Bimane IS	T1	Internal Standard	958	2668	2.24	2.24	0.00		M+	1	1	1	N/A	111	111	.000 (mmu)	N/A	N/A	N/A	Method	True	False	N/A	N/A	N/A			Pass	Pass	N/A	N/A	N/A	Confirmed	N/A
12	Processed	190522-012		Unknown		1011									SCN-Bimane IS	T1C1	Internal Standard	441	1458	2.24	2.23	0.01		M+	N/A	N/A	N/A	N/A	126.1	126.1	-.002 (mmu)	N/A	N/A	N/A	Method	True	False	N/A	N/A	N/A			Pass	Pass	N/A	N/A	N/A	Confirmed	N/A
13	Processed	190522-013		Unknown		1012									SCN-Bimane	T1	Target Compound	43	81	2.23	2.24	0.01		M+	0.868	N/A	0.868	N/A	111	111	.000 (mmu)	0.047	1	1719	Method	True	False	N/A	N/A	N/A			Pass	Fail	N/A	N/A	N/A	Identified	N/A
13	Processed	190522-013		Unknown		1012									SCN-Bimane	T1C1	Target Compound	58	50	2.24	2.24	0.00		M+	N/A	N/A	N/A	N/A	124.1	124.1	-.002 (mmu)	0.047	N/A	N/A	Method	True	False	N/A	N/A	N/A			Pass	Fail	N/A	N/A	N/A	Identified	N/A
13	Processed	190522-013		Unknown		1012									SCN-Bimane IS	T1	Internal Standard	646	1719	2.24	2.24	0.00		M+	1	1	1	N/A	111	111	.000 (mmu)	N/A	N/A	N/A	Method	True	False	N/A	N/A	N/A			Pass	Pass	N/A	N/A	N/A	Confirmed	N/A
13	Processed	190522-013		Unknown		1012									SCN-Bimane IS	T1C1	Internal Standard	418	1164	2.24	2.24	0.00		M+	N/A	N/A	N/A	N/A	126.1	126.1	-.002 (mmu)	N/A	N/A	N/A	Method	True	False	N/A	N/A	N/A			Pass	Pass	N/A	N/A	N/A	Confirmed	N/A
14	Processed	190522-014		Unknown		1013									SCN-Bimane	T1	Target Compound	8	3	2.23	2.15	-0.08		M+	-0.16	N/A	-0.16	N/A	111	111	.000 (mmu)	0.002	1	1942	Method	True	False	N/A	N/A	N/A			Pass	Fail	N/A	N/A	N/A	Identified	N/A
14	Processed	190522-014		Unknown		1013									SCN-Bimane	T1C1	Target Compound	0	0	2.15	2.24	-0.09		M+	N/A	N/A	N/A	N/A	124.1	124.1	-.002 (mmu)	0.002	N/A	N/A	Method	True	False	N/A	N/A	N/A			Pass	Fail	N/A	N/A	N/A	Identified	N/A
14	Processed	190522-014		Unknown		1013									SCN-Bimane IS	T1	Internal Standard	744	1942	2.24	2.24	0.00		M+	1	1	1	N/A	111	111	.000 (mmu)	N/A	N/A	N/A	Method	True	False	N/A	N/A	N/A			Pass	Pass	N/A	N/A	N/A	Confirmed	N/A
14	Processed	190522-014		Unknown		1013									SCN-Bimane IS	T1C1	Internal Standard	467	1256	2.24	2.23	0.01		M+	N/A	N/A	N/A	N/A	126.1	126.1	-.002 (mmu)	N/A	N/A	N/A	Method	True	False	N/A	N/A	N/A			Pass	Pass	N/A	N/A	N/A	Confirmed	N/A
15	Processed	190522-015		Unknown		1014									SCN-Bimane	T1	Target Compound	20	15	2.23	2.23	0.00		M+	-0.04	N/A	-0.04	N/A	111	111	.000 (mmu)	0.007	1	2051	Method	True	False	N/A	N/A	N/A			Pass	Pass	N/A	N/A	N/A	Confirmed	N/A
15	Processed	190522-015		Unknown		1014									SCN-Bimane	T1C1	Target Compound	11	7	2.23	2.22	0.00		M+	N/A	N/A	N/A	N/A	124.1	124.1	-.002 (mmu)	0.007	N/A	N/A	Method	True	False	N/A	N/A	N/A			Pass	Pass	N/A	N/A	N/A	Confirmed	N/A
15	Processed	190522-015		Unknown		1014									SCN-Bimane IS	T1	Internal Standard	890	2051	2.24	2.23	-0.01		M+	1	1	1	N/A	111	111	.000 (mmu)	N/A	N/A	N/A	Method	True	False	N/A	N/A	N/A			Pass	Pass	N/A	N/A	N/A	Confirmed	N/A
15	Processed	190522-015		Unknown		1014									SCN-Bimane IS	T1C1	Internal Standard	403	1367	2.23	2.23	0.00		M+	N/A	N/A	N/A	N/A	126.1	126.1	-.002 (mmu)	N/A	N/A	N/A	Method	True	False	N/A	N/A	N/A			Pass	Pass	N/A	N/A	N/A	Confirmed	N/A
16	Processed	190522-016		Unknown		1015									SCN-Bimane	T1	Target Compound	42	83	2.23	2.24	0.01		M+	0.679	N/A	0.679	N/A	111	111	.000 (mmu)	0.039	1	2154	Method	True	False	N/A	N/A	N/A			Pass	Fail	N/A	N/A	N/A	Identified	N/A
16	Processed	190522-016		Unknown		1015									SCN-Bimane	T1C1	Target Compound	5	3	2.24	2.23	0.01		M+	N/A	N/A	N/A	N/A	124.1	124.1	-.002 (mmu)	0.039	N/A	N/A	Method	True	False	N/A	N/A	N/A			Pass	Fail	N/A	N/A	N/A	Identified	N/A
16	Processed	190522-016		Unknown		1015									SCN-Bimane IS	T1	Internal Standard	797	2154	2.24	2.23	-0.01		M+	1	1	1	N/A	111	111	.000 (mmu)	N/A	N/A	N/A	Method	True	False	N/A	N/A	N/A			Pass	Pass	N/A	N/A	N/A	Confirmed	N/A
16	Processed	190522-016		Unknown		1015									SCN-Bimane IS	T1C1	Internal Standard	445	1526	2.23	2.24	-0.01		M+	N/A	N/A	N/A	N/A	126.1	126.1	-.002 (mmu)	N/A	N/A	N/A	Method	True	False	N/A	N/A	N/A			Pass	Pass	N/A	N/A	N/A	Confirmed	N/A
17	Processed	190522-017		Unknown		1016									SCN-Bimane	T1	Target Compound	6	4	2.23	2.21	-0.02		M+	-0.148	N/A	-0.148	N/A	111	111	.000 (mmu)	0.002	1	1817	Method	True	False	N/A	N/A	N/A			Pass	Fail	N/A	N/A	N/A	Identified	N/A
17	Processed	190522-017		Unknown		1016									SCN-Bimane	T1C1	Target Compound	0	0	2.21	2.22	-0.01		M+	N/A	N/A	N/A	N/A	124.1	124.1	-.002 (mmu)	0.002	N/A	N/A	Method	True	False	N/A	N/A	N/A			Pass	Fail	N/A	N/A	N/A	Identified	N/A
17	Processed	190522-017		Unknown		1016									SCN-Bimane IS	T1	Internal Standard	628	1817	2.24	2.22	-0.02		M+	1	1	1	N/A	111	111	.000 (mmu)	N/A	N/A	N/A	Method	True	False	N/A	N/A	N/A			Pass	Pass	N/A	N/A	N/A	Confirmed	N/A
17	Processed	190522-017		Unknown		1016									SCN-Bimane IS	T1C1	Internal Standard	402	1110	2.22	2.22	0.00		M+	N/A	N/A	N/A	N/A	126.1	126.1	-.002 (mmu)	N/A	N/A	N/A	Method	True	False	N/A	N/A	N/A			Pass	Pass	N/A	N/A	N/A	Confirmed	N/A
18	Processed	190522-018		Unknown		1017									SCN-Bimane	T1	Target Compound	15	10	2.23	2.21	-0.02		M+	-0.093	N/A	-0.093	N/A	111	111	.000 (mmu)	0.005	1	2040	Method	True	False	N/A	N/A	N/A			Pass	Fail	N/A	N/A	N/A	Identified	N/A
18	Processed	190522-018		Unknown		1017									SCN-Bimane	T1C1	Target Compound	19	8	2.21	2.22	-0.01		M+	N/A	N/A	N/A	N/A	124.1	124.1	-.002 (mmu)	0.005	N/A	N/A	Method	True	False	N/A	N/A	N/A			Pass	Fail	N/A	N/A	N/A	Identified	N/A
18	Processed	190522-018		Unknown		1017									SCN-Bimane IS	T1	Internal Standard	700	2040	2.24	2.24	0.00		M+	1	1	1	N/A	111	111	.000 (mmu)	N/A	N/A	N/A	Method	True	False	N/A	N/A	N/A			Pass	Pass	N/A	N/A	N/A	Confirmed	N/A
18	Processed	190522-018		Unknown		1017									SCN-Bimane IS	T1C1	Internal Standard	407	1248	2.24	2.24	0.00		M+	N/A	N/A	N/A	N/A	126.1	126.1	-.002 (mmu)	N/A	N/A	N/A	Method	True	False	N/A	N/A	N/A			Pass	Pass	N/A	N/A	N/A	Confirmed	N/A
19	Processed	190522-019		Unknown		1018									SCN-Bimane	T1	Target Compound	72	85	2.23	2.23	0.00		M+	0.892	N/A	0.892	N/A	111	111	.000 (mmu)	0.048	1	1771	Method	True	False	N/A	N/A	N/A			Pass	Fail	N/A	N/A	N/A	Identified	N/A
19	Processed	190522-019		Unknown		1018									SCN-Bimane	T1C1	Target Compound	2	1	2.23	2.23	0.00		M+	N/A	N/A	N/A	N/A	124.1	124.1	-.002 (mmu)	0.048	N/A	N/A	Method	True	False	N/A	N/A	N/A			Pass	Fail	N/A	N/A	N/A	Identified	N/A
19	Processed	190522-019		Unknown		1018									SCN-Bimane IS	T1	Internal Standard	669	1771	2.24	2.24	0.00		M+	1	1	1	N/A	111	111	.000 (mmu)	N/A	N/A	N/A	Method	True	False	N/A	N/A	N/A			Pass	Pass	N/A	N/A	N/A	Confirmed	N/A
19	Processed	190522-019		Unknown		1018									SCN-Bimane IS	T1C1	Internal Standard	352	1037	2.24	2.23	0.01		M+	N/A	N/A	N/A	N/A	126.1	126.1	-.002 (mmu)	N/A	N/A	N/A	Method	True	False	N/A	N/A	N/A			Pass	Pass	N/A	N/A	N/A	Confirmed	N/A
20	Processed	190522-020		Unknown		1019									SCN-Bimane	T1	Target Compound	30	40	2.23	2.24	0.01		M+	0.237	N/A	0.237	N/A	111	111	.000 (mmu)	0.019	1	2073	Method	True	False	N/A	N/A	N/A			Pass	Fail	N/A	N/A	N/A	Identified	N/A
20	Processed	190522-020		Unknown		1019									SCN-Bimane	T1C1	Target Compound	9	7	2.24	2.23	0.01		M+	N/A	N/A	N/A	N/A	124.1	124.1	-.002 (mmu)	0.019	N/A	N/A	Method	True	False	N/A	N/A	N/A			Pass	Fail	N/A	N/A	N/A	Identified	N/A
20	Processed	190522-020		Unknown		1019									SCN-Bimane IS	T1	Internal Standard	802	2073	2.24	2.24	0.00		M+	1	1	1	N/A	111	111	.000 (mmu)	N/A	N/A	N/A	Method	True	False	N/A	N/A	N/A			Pass	Pass	N/A	N/A	N/A	Confirmed	N/A
20	Processed	190522-020		Unknown		1019									SCN-Bimane IS	T1C1	Internal Standard	417	1312	2.24	2.23	0.01		M+	N/A	N/A	N/A	N/A	126.1	126.1	-.002 (mmu)	N/A	N/A	N/A	Method	True	False	N/A	N/A	N/A			Pass	Pass	N/A	N/A	N/A	Confirmed	N/A
21	Processed	190522-021		Unknown		1020									SCN-Bimane	T1	Target Compound	53	76	2.23	2.23	0.00		M+	0.643	N/A	0.643	N/A	111	111	.000 (mmu)	0.037	1	2054	Method	True	False	N/A	N/A	N/A			Pass	Fail	N/A	N/A	N/A	Identified	N/A
21	Processed	190522-021		Unknown		1020									SCN-Bimane	T1C1	Target Compound	46	72	2.23	2.23	0.00		M+	N/A	N/A	N/A	N/A	124.1	124.1	-.002 (mmu)	0.037	N/A	N/A	Method	True	False	N/A	N/A	N/A			Pass	Fail	N/A	N/A	N/A	Identified	N/A
21	Processed	190522-021		Unknown		1020									SCN-Bimane IS	T1	Internal Standard	794	2054	2.24	2.23	-0.01		M+	1	1	1	N/A	111	111	.000 (mmu)	N/A	N/A	N/A	Method	True	False	N/A	N/A	N/A			Pass	Pass	N/A	N/A	N/A	Confirmed	N/A
21	Processed	190522-021		Unknown		1020									SCN-Bimane IS	T1C1	Internal Standard	441	1432	2.23	2.23	0.00		M+	N/A	N/A	N/A	N/A	126.1	126.1	-.002 (mmu)	N/A	N/A	N/A	Method	True	False	N/A	N/A	N/A			Pass	Pass	N/A	N/A	N/A	Confirmed	N/A
22	Processed	190522-022		Unknown		1021									SCN-Bimane	T1	Target Compound	49	48	2.23	2.24	0.01		M+	0.259	N/A	0.259	N/A	111	111	.000 (mmu)	0.02	1	2354	Method	True	False	N/A	N/A	N/A			Pass	Pass	N/A	N/A	N/A	Confirmed	N/A
22	Processed	190522-022		Unknown		1021									SCN-Bimane	T1C1	Target Compound	46	23	2.24	2.26	-0.02		M+	N/A	N/A	N/A	N/A	124.1	124.1	-.002 (mmu)	0.02	N/A	N/A	Method	True	False	N/A	N/A	N/A			Pass	Pass	N/A	N/A	N/A	Confirmed	N/A
22	Processed	190522-022		Unknown		1021									SCN-Bimane IS	T1	Internal Standard	868	2354	2.24	2.23	-0.01		M+	1	1	1	N/A	111	111	.000 (mmu)	N/A	N/A	N/A	Method	True	False	N/A	N/A	N/A			Pass	Pass	N/A	N/A	N/A	Confirmed	N/A
22	Processed	190522-022		Unknown		1021									SCN-Bimane IS	T1C1	Internal Standard	427	1452	2.23	2.24	-0.01		M+	N/A	N/A	N/A	N/A	126.1	126.1	-.002 (mmu)	N/A	N/A	N/A	Method	True	False	N/A	N/A	N/A			Pass	Pass	N/A	N/A	N/A	Confirmed	N/A
23	Processed	190522-023		Unknown		1022									SCN-Bimane	T1	Target Compound	36	36	2.23	2.22	-0.01		M+	0.116	N/A	0.116	N/A	111	111	.000 (mmu)	0.014	1	2598	Method	True	False	N/A	N/A	N/A			Pass	Pass	N/A	N/A	N/A	Confirmed	N/A
23	Processed	190522-023		Unknown		1022									SCN-Bimane	T1C1	Target Compound	22	17	2.22	2.23	0.00		M+	N/A	N/A	N/A	N/A	124.1	124.1	-.002 (mmu)	0.014	N/A	N/A	Method	True	False	N/A	N/A	N/A			Pass	Pass	N/A	N/A	N/A	Confirmed	N/A
23	Processed	190522-023		Unknown		1022									SCN-Bimane IS	T1	Internal Standard	1057	2598	2.24	2.24	0.00		M+	1	1	1	N/A	111	111	.000 (mmu)	N/A	N/A	N/A	Method	True	False	N/A	N/A	N/A			Pass	Pass	N/A	N/A	N/A	Confirmed	N/A
23	Processed	190522-023		Unknown		1022									SCN-Bimane IS	T1C1	Internal Standard	527	1603	2.24	2.23	0.01		M+	N/A	N/A	N/A	N/A	126.1	126.1	-.002 (mmu)	N/A	N/A	N/A	Method	True	False	N/A	N/A	N/A			Pass	Pass	N/A	N/A	N/A	Confirmed	N/A
24	Processed	190522-024		Unknown		1023									SCN-Bimane	T1	Target Compound	26	12	2.23	2.23	0.00		M+	-0.085	N/A	-0.085	N/A	111	111	.000 (mmu)	0.005	1	2356	Method	True	False	N/A	N/A	N/A			Pass	Fail	N/A	N/A	N/A	Identified	N/A
24	Processed	190522-024		Unknown		1023									SCN-Bimane	T1C1	Target Compound	0	0	2.23	2.28	-0.05		M+	N/A	N/A	N/A	N/A	124.1	124.1	-.002 (mmu)	0.005	N/A	N/A	Method	True	False	N/A	N/A	N/A			Pass	Fail	N/A	N/A	N/A	Identified	N/A
24	Processed	190522-024		Unknown		1023									SCN-Bimane IS	T1	Internal Standard	822	2356	2.24	2.24	0.00		M+	1	1	1	N/A	111	111	.000 (mmu)	N/A	N/A	N/A	Method	True	False	N/A	N/A	N/A			Pass	Pass	N/A	N/A	N/A	Confirmed	N/A
24	Processed	190522-024		Unknown		1023									SCN-Bimane IS	T1C1	Internal Standard	458	1468	2.24	2.23	0.01		M+	N/A	N/A	N/A	N/A	126.1	126.1	-.002 (mmu)	N/A	N/A	N/A	Method	True	False	N/A	N/A	N/A			Pass	Pass	N/A	N/A	N/A	Confirmed	N/A
25	Processed	190522-025		Unknown		1024									SCN-Bimane	T1	Target Compound	65	80	2.23	2.25	0.02		M+	0.655	N/A	0.655	N/A	111	111	.000 (mmu)	0.038	1	2131	Method	True	False	N/A	N/A	N/A			Pass	Fail	N/A	N/A	N/A	Identified	N/A
25	Processed	190522-025		Unknown		1024									SCN-Bimane	T1C1	Target Compound	10	4	2.25	2.27	-0.01		M+	N/A	N/A	N/A	N/A	124.1	124.1	-.002 (mmu)	0.038	N/A	N/A	Method	True	False	N/A	N/A	N/A			Pass	Fail	N/A	N/A	N/A	Identified	N/A
25	Processed	190522-025		Unknown		1024									SCN-Bimane IS	T1	Internal Standard	755	2131	2.24	2.23	-0.01		M+	1	1	1	N/A	111	111	.000 (mmu)	N/A	N/A	N/A	Method	True	False	N/A	N/A	N/A			Pass	Pass	N/A	N/A	N/A	Confirmed	N/A
25	Processed	190522-025		Unknown		1024									SCN-Bimane IS	T1C1	Internal Standard	503	1269	2.23	2.23	0.00		M+	N/A	N/A	N/A	N/A	126.1	126.1	-.002 (mmu)	N/A	N/A	N/A	Method	True	False	N/A	N/A	N/A			Pass	Pass	N/A	N/A	N/A	Confirmed	N/A
26	Processed	190522-026		Unknown		1025									SCN-Bimane	T1	Target Compound	44	44	2.23	2.24	0.01		M+	0.256	N/A	0.256	N/A	111	111	.000 (mmu)	0.02	1	2177	Method	True	False	N/A	N/A	N/A			Pass	Fail	N/A	N/A	N/A	Identified	N/A
26	Processed	190522-026		Unknown		1025									SCN-Bimane	T1C1	Target Compound	0	0	2.24	2.2	0.04		M+	N/A	N/A	N/A	N/A	124.1	124.1	-.002 (mmu)	0.02	N/A	N/A	Method	True	False	N/A	N/A	N/A			Pass	Fail	N/A	N/A	N/A	Identified	N/A
26	Processed	190522-026		Unknown		1025									SCN-Bimane IS	T1	Internal Standard	940	2177	2.24	2.24	0.00		M+	1	1	1	N/A	111	111	.000 (mmu)	N/A	N/A	N/A	Method	True	False	N/A	N/A	N/A			Pass	Pass	N/A	N/A	N/A	Confirmed	N/A
26	Processed	190522-026		Unknown		1025									SCN-Bimane IS	T1C1	Internal Standard	500	1448	2.24	2.23	0.01		M+	N/A	N/A	N/A	N/A	126.1	126.1	-.002 (mmu)	N/A	N/A	N/A	Method	True	False	N/A	N/A	N/A			Pass	Pass	N/A	N/A	N/A	Confirmed	N/A
27	Processed	190522-027		Unknown		1026									SCN-Bimane	T1	Target Compound	1118	2887	2.23	2.23	0.00		M+	38.599	N/A	38.599	N/A	111	111	.000 (mmu)	1.71	1	1689	Method	True	False	N/A	N/A	N/A			Pass	Pass	N/A	N/A	N/A	Confirmed	N/A
27	Processed	190522-027		Unknown		1026									SCN-Bimane	T1C1	Target Compound	488	1173	2.23	2.23	0.00		M+	N/A	N/A	N/A	N/A	124.1	124.1	-.002 (mmu)	1.71	N/A	N/A	Method	True	False	N/A	N/A	N/A			Pass	Pass	N/A	N/A	N/A	Confirmed	N/A
27	Processed	190522-027		Unknown		1026									SCN-Bimane IS	T1	Internal Standard	712	1689	2.24	2.24	0.00		M+	1	1	1	N/A	111	111	.000 (mmu)	N/A	N/A	N/A	Method	True	False	N/A	N/A	N/A			Pass	Pass	N/A	N/A	N/A	Confirmed	N/A
27	Processed	190522-027		Unknown		1026									SCN-Bimane IS	T1C1	Internal Standard	328	1098	2.24	2.24	0.00		M+	N/A	N/A	N/A	N/A	126.1	126.1	-.002 (mmu)	N/A	N/A	N/A	Method	True	False	N/A	N/A	N/A			Pass	Pass	N/A	N/A	N/A	Confirmed	N/A
28	Processed	190522-028		Unknown		1027									SCN-Bimane	T1	Target Compound	848	2261	2.23	2.24	0.01		M+	19.155	N/A	19.155	N/A	111	111	.000 (mmu)	0.853	1	2651	Method	True	False	N/A	N/A	N/A			Pass	Pass	N/A	N/A	N/A	Confirmed	N/A
28	Processed	190522-028		Unknown		1027									SCN-Bimane	T1C1	Target Compound	433	1058	2.24	2.24	0.00		M+	N/A	N/A	N/A	N/A	124.1	124.1	-.002 (mmu)	0.853	N/A	N/A	Method	True	False	N/A	N/A	N/A			Pass	Pass	N/A	N/A	N/A	Confirmed	N/A
28	Processed	190522-028		Unknown		1027									SCN-Bimane IS	T1	Internal Standard	1112	2651	2.24	2.23	-0.01		M+	1	1	1	N/A	111	111	.000 (mmu)	N/A	N/A	N/A	Method	True	False	N/A	N/A	N/A			Pass	Fail	N/A	N/A	N/A	Identified	N/A
28	Processed	190522-028		Unknown		1027									SCN-Bimane IS	T1C1	Internal Standard	533	1299	2.23	2.23	0.00		M+	N/A	N/A	N/A	N/A	126.1	126.1	-.002 (mmu)	N/A	N/A	N/A	Method	True	False	N/A	N/A	N/A			Pass	Fail	N/A	N/A	N/A	Identified	N/A
29	Processed	190522-029		Unknown		1028									SCN-Bimane	T1	Target Compound	343	750	2.23	2.24	0.01		M+	9.338	N/A	9.338	N/A	111	111	.000 (mmu)	0.42	1	1785	Method	True	False	N/A	N/A	N/A			Pass	Pass	N/A	N/A	N/A	Confirmed	N/A
29	Processed	190522-029		Unknown		1028									SCN-Bimane	T1C1	Target Compound	149	418	2.24	2.24	0.00		M+	N/A	N/A	N/A	N/A	124.1	124.1	-.002 (mmu)	0.42	N/A	N/A	Method	True	False	N/A	N/A	N/A			Pass	Pass	N/A	N/A	N/A	Confirmed	N/A
29	Processed	190522-029		Unknown		1028									SCN-Bimane IS	T1	Internal Standard	616	1785	2.24	2.23	-0.01		M+	1	1	1	N/A	111	111	.000 (mmu)	N/A	N/A	N/A	Method	True	False	N/A	N/A	N/A			Pass	Pass	N/A	N/A	N/A	Confirmed	N/A
29	Processed	190522-029		Unknown		1028									SCN-Bimane IS	T1C1	Internal Standard	289	1078	2.23	2.24	-0.01		M+	N/A	N/A	N/A	N/A	126.1	126.1	-.002 (mmu)	N/A	N/A	N/A	Method	True	False	N/A	N/A	N/A			Pass	Pass	N/A	N/A	N/A	Confirmed	N/A
30	Processed	190522-030		Unknown		1029									SCN-Bimane	T1	Target Compound	242	609	2.23	2.22	-0.01		M+	6.425	N/A	6.425	N/A	111	111	.000 (mmu)	0.292	1	2086	Method	True	False	N/A	N/A	N/A			Pass	Pass	N/A	N/A	N/A	Confirmed	N/A
30	Processed	190522-030		Unknown		1029									SCN-Bimane	T1C1	Target Compound	129	344	2.22	2.23	-0.01		M+	N/A	N/A	N/A	N/A	124.1	124.1	-.002 (mmu)	0.292	N/A	N/A	Method	True	False	N/A	N/A	N/A			Pass	Pass	N/A	N/A	N/A	Confirmed	N/A
30	Processed	190522-030		Unknown		1029									SCN-Bimane IS	T1	Internal Standard	675	2086	2.24	2.24	0.00		M+	1	1	1	N/A	111	111	.000 (mmu)	N/A	N/A	N/A	Method	True	False	N/A	N/A	N/A			Pass	Pass	N/A	N/A	N/A	Confirmed	N/A
30	Processed	190522-030		Unknown		1029									SCN-Bimane IS	T1C1	Internal Standard	403	1152	2.24	2.23	0.01		M+	N/A	N/A	N/A	N/A	126.1	126.1	-.002 (mmu)	N/A	N/A	N/A	Method	True	False	N/A	N/A	N/A			Pass	Pass	N/A	N/A	N/A	Confirmed	N/A
31	Processed	190522-031		Unknown		1030									SCN-Bimane	T1	Target Compound	20	9	2.23	2.24	0.01		M+	-0.087	N/A	-0.087	N/A	111	111	.000 (mmu)	0.005	1	1714	Method	True	False	N/A	N/A	N/A			Pass	Fail	N/A	N/A	N/A	Identified	N/A
31	Processed	190522-031		Unknown		1030									SCN-Bimane	T1C1	Target Compound	1	0	2.24	2.23	0.00		M+	N/A	N/A	N/A	N/A	124.1	124.1	-.002 (mmu)	0.005	N/A	N/A	Method	True	False	N/A	N/A	N/A			Pass	Fail	N/A	N/A	N/A	Identified	N/A
31	Processed	190522-031		Unknown		1030									SCN-Bimane IS	T1	Internal Standard	656	1714	2.24	2.24	0.00		M+	1	1	1	N/A	111	111	.000 (mmu)	N/A	N/A	N/A	Method	True	False	N/A	N/A	N/A			Pass	Pass	N/A	N/A	N/A	Confirmed	N/A
31	Processed	190522-031		Unknown		1030									SCN-Bimane IS	T1C1	Internal Standard	288	907	2.24	2.23	0.01		M+	N/A	N/A	N/A	N/A	126.1	126.1	-.002 (mmu)	N/A	N/A	N/A	Method	True	False	N/A	N/A	N/A			Pass	Pass	N/A	N/A	N/A	Confirmed	N/A
32	Processed	190522-032		Unknown		1031									SCN-Bimane	T1	Target Compound	28	23	2.23	2.21	-0.02		M+	0.045	N/A	0.045	N/A	111	111	.000 (mmu)	0.011	1	2152	Method	True	False	N/A	N/A	N/A			Pass	Fail	N/A	N/A	N/A	Identified	N/A
32	Processed	190522-032		Unknown		1031									SCN-Bimane	T1C1	Target Compound	12	5	2.21	2.2	0.01		M+	N/A	N/A	N/A	N/A	124.1	124.1	-.002 (mmu)	0.011	N/A	N/A	Method	True	False	N/A	N/A	N/A			Pass	Fail	N/A	N/A	N/A	Identified	N/A
32	Processed	190522-032		Unknown		1031									SCN-Bimane IS	T1	Internal Standard	914	2152	2.24	2.23	-0.01		M+	1	1	1	N/A	111	111	.000 (mmu)	N/A	N/A	N/A	Method	True	False	N/A	N/A	N/A			Pass	Pass	N/A	N/A	N/A	Confirmed	N/A
32	Processed	190522-032		Unknown		1031									SCN-Bimane IS	T1C1	Internal Standard	492	1429	2.23	2.24	0.00		M+	N/A	N/A	N/A	N/A	126.1	126.1	-.002 (mmu)	N/A	N/A	N/A	Method	True	False	N/A	N/A	N/A			Pass	Pass	N/A	N/A	N/A	Confirmed	N/A
33	Processed	190522-033		Unknown		1032									SCN-Bimane	T1	Target Compound	635	1754	2.23	2.22	-0.01		M+	16.595	N/A	16.595	N/A	111	111	.000 (mmu)	0.74	1	2370	Method	True	False	N/A	N/A	N/A			Pass	Pass	N/A	N/A	N/A	Confirmed	N/A
33	Processed	190522-033		Unknown		1032									SCN-Bimane	T1C1	Target Compound	354	794	2.22	2.23	0.00		M+	N/A	N/A	N/A	N/A	124.1	124.1	-.002 (mmu)	0.74	N/A	N/A	Method	True	False	N/A	N/A	N/A			Pass	Pass	N/A	N/A	N/A	Confirmed	N/A
33	Processed	190522-033		Unknown		1032									SCN-Bimane IS	T1	Internal Standard	987	2370	2.24	2.24	0.00		M+	1	1	1	N/A	111	111	.000 (mmu)	N/A	N/A	N/A	Method	True	False	N/A	N/A	N/A			Pass	Pass	N/A	N/A	N/A	Confirmed	N/A
33	Processed	190522-033		Unknown		1032									SCN-Bimane IS	T1C1	Internal Standard	488	1548	2.24	2.23	0.01		M+	N/A	N/A	N/A	N/A	126.1	126.1	-.002 (mmu)	N/A	N/A	N/A	Method	True	False	N/A	N/A	N/A			Pass	Pass	N/A	N/A	N/A	Confirmed	N/A
34	Processed	190522-034		Unknown		1033									SCN-Bimane	T1	Target Compound	635	1477	2.23	2.24	0.01		M+	12.712	N/A	12.712	N/A	111	111	.000 (mmu)	0.569	1	2595	Method	True	False	N/A	N/A	N/A			Pass	Pass	N/A	N/A	N/A	Confirmed	N/A
34	Processed	190522-034		Unknown		1033									SCN-Bimane	T1C1	Target Compound	397	758	2.24	2.24	0.00		M+	N/A	N/A	N/A	N/A	124.1	124.1	-.002 (mmu)	0.569	N/A	N/A	Method	True	False	N/A	N/A	N/A			Pass	Pass	N/A	N/A	N/A	Confirmed	N/A
34	Processed	190522-034		Unknown		1033									SCN-Bimane IS	T1	Internal Standard	1029	2595	2.24	2.23	-0.01		M+	1	1	1	N/A	111	111	.000 (mmu)	N/A	N/A	N/A	Method	True	False	N/A	N/A	N/A			Pass	Pass	N/A	N/A	N/A	Confirmed	N/A
34	Processed	190522-034		Unknown		1033									SCN-Bimane IS	T1C1	Internal Standard	446	1468	2.23	2.23	0.00		M+	N/A	N/A	N/A	N/A	126.1	126.1	-.002 (mmu)	N/A	N/A	N/A	Method	True	False	N/A	N/A	N/A			Pass	Pass	N/A	N/A	N/A	Confirmed	N/A
35	Processed	190522-035		Unknown		1034									SCN-Bimane	T1	Target Compound	142	274	2.23	2.23	0.00		M+	2.279	N/A	2.279	N/A	111	111	.000 (mmu)	0.109	1	2505	Method	True	False	N/A	N/A	N/A			Pass	Pass	N/A	N/A	N/A	Confirmed	N/A
35	Processed	190522-035		Unknown		1034									SCN-Bimane	T1C1	Target Compound	92	124	2.23	2.24	-0.01		M+	N/A	N/A	N/A	N/A	124.1	124.1	-.002 (mmu)	0.109	N/A	N/A	Method	True	False	N/A	N/A	N/A			Pass	Pass	N/A	N/A	N/A	Confirmed	N/A
35	Processed	190522-035		Unknown		1034									SCN-Bimane IS	T1	Internal Standard	1114	2505	2.24	2.24	0.00		M+	1	1	1	N/A	111	111	.000 (mmu)	N/A	N/A	N/A	Method	True	False	N/A	N/A	N/A			Pass	Pass	N/A	N/A	N/A	Confirmed	N/A
35	Processed	190522-035		Unknown		1034									SCN-Bimane IS	T1C1	Internal Standard	490	1509	2.24	2.23	0.01		M+	N/A	N/A	N/A	N/A	126.1	126.1	-.002 (mmu)	N/A	N/A	N/A	Method	True	False	N/A	N/A	N/A			Pass	Pass	N/A	N/A	N/A	Confirmed	N/A
36	Processed	190522-036		Unknown		1035									SCN-Bimane	T1	Target Compound	105	126	2.23	2.22	-0.01		M+	2.181	N/A	2.181	N/A	111	111	.000 (mmu)	0.105	1	1203	Method	True	False	N/A	N/A	N/A			Pass	Fail	N/A	N/A	N/A	Identified	N/A
36	Processed	190522-036		Unknown		1035									SCN-Bimane	T1C1	Target Compound	12	6	2.22	2.2	0.02		M+	N/A	N/A	N/A	N/A	124.1	124.1	-.002 (mmu)	0.105	N/A	N/A	Method	True	False	N/A	N/A	N/A			Pass	Fail	N/A	N/A	N/A	Identified	N/A
36	Processed	190522-036		Unknown		1035									SCN-Bimane IS	T1	Internal Standard	638	1203	2.24	2.22	-0.02		M+	1	1	1	N/A	111	111	.000 (mmu)	N/A	N/A	N/A	Method	True	False	N/A	N/A	N/A			Pass	Pass	N/A	N/A	N/A	Confirmed	N/A
36	Processed	190522-036		Unknown		1035									SCN-Bimane IS	T1C1	Internal Standard	201	644	2.22	2.22	0.00		M+	N/A	N/A	N/A	N/A	126.1	126.1	-.002 (mmu)	N/A	N/A	N/A	Method	True	False	N/A	N/A	N/A			Pass	Pass	N/A	N/A	N/A	Confirmed	N/A
37	Processed	190522-037		Unknown		1036									SCN-Bimane	T1	Target Compound	457	1107	2.23	2.24	0.01		M+	11.804	N/A	11.804	N/A	111	111	.000 (mmu)	0.529	1	2093	Method	True	False	N/A	N/A	N/A			Pass	Pass	N/A	N/A	N/A	Confirmed	N/A
37	Processed	190522-037		Unknown		1036									SCN-Bimane	T1C1	Target Compound	245	528	2.24	2.23	0.01		M+	N/A	N/A	N/A	N/A	124.1	124.1	-.002 (mmu)	0.529	N/A	N/A	Method	True	False	N/A	N/A	N/A			Pass	Pass	N/A	N/A	N/A	Confirmed	N/A
37	Processed	190522-037		Unknown		1036									SCN-Bimane IS	T1	Internal Standard	919	2093	2.24	2.24	0.00		M+	1	1	1	N/A	111	111	.000 (mmu)	N/A	N/A	N/A	Method	True	False	N/A	N/A	N/A			Pass	Pass	N/A	N/A	N/A	Confirmed	N/A
37	Processed	190522-037		Unknown		1036									SCN-Bimane IS	T1C1	Internal Standard	463	1445	2.24	2.22	0.02		M+	N/A	N/A	N/A	N/A	126.1	126.1	-.002 (mmu)	N/A	N/A	N/A	Method	True	False	N/A	N/A	N/A			Pass	Pass	N/A	N/A	N/A	Confirmed	N/A
38	Processed	190522-038		Unknown		1037									SCN-Bimane	T1	Target Compound	458	1089	2.23	2.24	0.01		M+	11.655	N/A	11.655	N/A	111	111	.000 (mmu)	0.522	1	2084	Method	True	False	N/A	N/A	N/A			Pass	Fail	N/A	N/A	N/A	Identified	N/A
38	Processed	190522-038		Unknown		1037									SCN-Bimane	T1C1	Target Compound	336	661	2.24	2.23	0.01		M+	N/A	N/A	N/A	N/A	124.1	124.1	-.002 (mmu)	0.522	N/A	N/A	Method	True	False	N/A	N/A	N/A			Pass	Fail	N/A	N/A	N/A	Identified	N/A
38	Processed	190522-038		Unknown		1037									SCN-Bimane IS	T1	Internal Standard	850	2084	2.24	2.23	-0.01		M+	1	1	1	N/A	111	111	.000 (mmu)	N/A	N/A	N/A	Method	True	False	N/A	N/A	N/A			Pass	Pass	N/A	N/A	N/A	Confirmed	N/A
38	Processed	190522-038		Unknown		1037									SCN-Bimane IS	T1C1	Internal Standard	457	1335	2.23	2.23	0.00		M+	N/A	N/A	N/A	N/A	126.1	126.1	-.002 (mmu)	N/A	N/A	N/A	Method	True	False	N/A	N/A	N/A			Pass	Pass	N/A	N/A	N/A	Confirmed	N/A
39	Processed	190522-039		Unknown		1038									SCN-Bimane	T1	Target Compound	1123	2786	2.23	2.23	0.00		M+	27.548	N/A	27.548	N/A	111	111	.000 (mmu)	1.223	1	2278	Method	True	False	N/A	N/A	N/A			Pass	Pass	N/A	N/A	N/A	Confirmed	N/A
39	Processed	190522-039		Unknown		1038									SCN-Bimane	T1C1	Target Compound	629	1385	2.23	2.24	-0.01		M+	N/A	N/A	N/A	N/A	124.1	124.1	-.002 (mmu)	1.223	N/A	N/A	Method	True	False	N/A	N/A	N/A			Pass	Pass	N/A	N/A	N/A	Confirmed	N/A
39	Processed	190522-039		Unknown		1038									SCN-Bimane IS	T1	Internal Standard	1025	2278	2.24	2.23	-0.01		M+	1	1	1	N/A	111	111	.000 (mmu)	N/A	N/A	N/A	Method	True	False	N/A	N/A	N/A			Pass	Pass	N/A	N/A	N/A	Confirmed	N/A
39	Processed	190522-039		Unknown		1038									SCN-Bimane IS	T1C1	Internal Standard	472	1377	2.23	2.24	-0.01		M+	N/A	N/A	N/A	N/A	126.1	126.1	-.002 (mmu)	N/A	N/A	N/A	Method	True	False	N/A	N/A	N/A			Pass	Pass	N/A	N/A	N/A	Confirmed	N/A
40	Processed	190522-040		Unknown		1039									SCN-Bimane	T1	Target Compound	467	964	2.23	2.24	0.01		M+	28.402	N/A	28.402	N/A	111	111	.000 (mmu)	1.26	1	765	Method	True	False	N/A	N/A	N/A			Pass	Pass	N/A	N/A	N/A	Confirmed	N/A
40	Processed	190522-040		Unknown		1039									SCN-Bimane	T1C1	Target Compound	310	556	2.24	2.22	0.01		M+	N/A	N/A	N/A	N/A	124.1	124.1	-.002 (mmu)	1.26	N/A	N/A	Method	True	False	N/A	N/A	N/A			Pass	Pass	N/A	N/A	N/A	Confirmed	N/A
40	Processed	190522-040		Unknown		1039									SCN-Bimane IS	T1	Internal Standard	450	765	2.24	2.24	0.00		M+	1	1	1	N/A	111	111	.000 (mmu)	N/A	N/A	N/A	Method	True	False	N/A	N/A	N/A			Pass	Fail	N/A	N/A	N/A	Identified	N/A
40	Processed	190522-040		Unknown		1039									SCN-Bimane IS	T1C1	Internal Standard	267	712	2.24	2.23	0.01		M+	N/A	N/A	N/A	N/A	126.1	126.1	-.002 (mmu)	N/A	N/A	N/A	Method	True	False	N/A	N/A	N/A			Pass	Fail	N/A	N/A	N/A	Identified	N/A
41	Processed	190522-041		Unknown		1040									SCN-Bimane	T1	Target Compound	1349	3283	2.23	2.23	0.00		M+	37.942	N/A	37.942	N/A	111	111	.000 (mmu)	1.681	1	1954	Method	True	False	N/A	N/A	N/A			Pass	Pass	N/A	N/A	N/A	Confirmed	N/A
41	Processed	190522-041		Unknown		1040									SCN-Bimane	T1C1	Target Compound	674	1614	2.23	2.24	-0.01		M+	N/A	N/A	N/A	N/A	124.1	124.1	-.002 (mmu)	1.681	N/A	N/A	Method	True	False	N/A	N/A	N/A			Pass	Pass	N/A	N/A	N/A	Confirmed	N/A
41	Processed	190522-041		Unknown		1040									SCN-Bimane IS	T1	Internal Standard	802	1954	2.24	2.23	-0.01		M+	1	1	1	N/A	111	111	.000 (mmu)	N/A	N/A	N/A	Method	True	False	N/A	N/A	N/A			Pass	Pass	N/A	N/A	N/A	Confirmed	N/A
41	Processed	190522-041		Unknown		1040									SCN-Bimane IS	T1C1	Internal Standard	560	1476	2.23	2.24	-0.01		M+	N/A	N/A	N/A	N/A	126.1	126.1	-.002 (mmu)	N/A	N/A	N/A	Method	True	False	N/A	N/A	N/A			Pass	Pass	N/A	N/A	N/A	Confirmed	N/A
42	Processed	190522-042		Unknown		1041									SCN-Bimane	T1	Target Compound	1904	4051	2.23	2.24	0.01		M+	51.216	N/A	51.216	N/A	111	111	.000 (mmu)	2.266	1	1788	Method	True	False	N/A	N/A	N/A			Pass	Pass	N/A	N/A	N/A	Confirmed	N/A
42	Processed	190522-042		Unknown		1041									SCN-Bimane	T1C1	Target Compound	913	1906	2.24	2.23	0.01		M+	N/A	N/A	N/A	N/A	124.1	124.1	-.002 (mmu)	2.266	N/A	N/A	Method	True	False	N/A	N/A	N/A			Pass	Pass	N/A	N/A	N/A	Confirmed	N/A
42	Processed	190522-042		Unknown		1041									SCN-Bimane IS	T1	Internal Standard	752	1788	2.24	2.24	0.00		M+	1	1	1	N/A	111	111	.000 (mmu)	N/A	N/A	N/A	Method	True	False	N/A	N/A	N/A			Pass	Pass	N/A	N/A	N/A	Confirmed	N/A
42	Processed	190522-042		Unknown		1041									SCN-Bimane IS	T1C1	Internal Standard	504	1294	2.24	2.23	0.01		M+	N/A	N/A	N/A	N/A	126.1	126.1	-.002 (mmu)	N/A	N/A	N/A	Method	True	False	N/A	N/A	N/A			Pass	Pass	N/A	N/A	N/A	Confirmed	N/A
43	Processed	190522-043		Unknown		1042									SCN-Bimane	T1	Target Compound	37	30	2.23	2.24	0.01		M+	0.232	N/A	0.232	N/A	111	111	.000 (mmu)	0.019	1	1586	Method	True	False	N/A	N/A	N/A			Pass	Fail	N/A	N/A	N/A	Identified	N/A
43	Processed	190522-043		Unknown		1042									SCN-Bimane	T1C1	Target Compound	23	11	2.24	2.24	-0.01		M+	N/A	N/A	N/A	N/A	124.1	124.1	-.002 (mmu)	0.019	N/A	N/A	Method	True	False	N/A	N/A	N/A			Pass	Fail	N/A	N/A	N/A	Identified	N/A
43	Processed	190522-043		Unknown		1042									SCN-Bimane IS	T1	Internal Standard	687	1586	2.24	2.23	-0.01		M+	1	1	1	N/A	111	111	.000 (mmu)	N/A	N/A	N/A	Method	True	False	N/A	N/A	N/A			Pass	Pass	N/A	N/A	N/A	Confirmed	N/A
43	Processed	190522-043		Unknown		1042									SCN-Bimane IS	T1C1	Internal Standard	273	958	2.23	2.25	-0.02		M+	N/A	N/A	N/A	N/A	126.1	126.1	-.002 (mmu)	N/A	N/A	N/A	Method	True	False	N/A	N/A	N/A			Pass	Pass	N/A	N/A	N/A	Confirmed	N/A
44	Processed	190522-044		Unknown		1043									SCN-Bimane	T1	Target Compound	16	12	2.23	2.22	-0.01		M+	-0.085	N/A	-0.085	N/A	111	111	.000 (mmu)	0.005	1	2443	Method	True	False	N/A	N/A	N/A			Pass	Fail	N/A	N/A	N/A	Identified	N/A
44	Processed	190522-044		Unknown		1043									SCN-Bimane	T1C1	Target Compound	13	8	2.22	2.23	0.00		M+	N/A	N/A	N/A	N/A	124.1	124.1	-.002 (mmu)	0.005	N/A	N/A	Method	True	False	N/A	N/A	N/A			Pass	Fail	N/A	N/A	N/A	Identified	N/A
44	Processed	190522-044		Unknown		1043									SCN-Bimane IS	T1	Internal Standard	1041	2443	2.24	2.23	-0.01		M+	1	1	1	N/A	111	111	.000 (mmu)	N/A	N/A	N/A	Method	True	False	N/A	N/A	N/A			Pass	Pass	N/A	N/A	N/A	Confirmed	N/A
44	Processed	190522-044		Unknown		1043									SCN-Bimane IS	T1C1	Internal Standard	416	1376	2.23	2.24	0.00		M+	N/A	N/A	N/A	N/A	126.1	126.1	-.002 (mmu)	N/A	N/A	N/A	Method	True	False	N/A	N/A	N/A			Pass	Pass	N/A	N/A	N/A	Confirmed	N/A
45	Processed	190522-045		Unknown		1044									SCN-Bimane	T1	Target Compound	7	3	2.23	2.24	0.01		M+	-0.168	N/A	-0.168	N/A	111	111	.000 (mmu)	0.001	1	2295	Method	True	False	N/A	N/A	N/A			Pass	Fail	N/A	N/A	N/A	Identified	N/A
45	Processed	190522-045		Unknown		1044									SCN-Bimane	T1C1	Target Compound	0	0	2.24	2.23	0.01		M+	N/A	N/A	N/A	N/A	124.1	124.1	-.002 (mmu)	0.001	N/A	N/A	Method	True	False	N/A	N/A	N/A			Pass	Fail	N/A	N/A	N/A	Identified	N/A
45	Processed	190522-045		Unknown		1044									SCN-Bimane IS	T1	Internal Standard	1116	2295	2.24	2.23	-0.01		M+	1	1	1	N/A	111	111	.000 (mmu)	N/A	N/A	N/A	Method	True	False	N/A	N/A	N/A			Pass	Pass	N/A	N/A	N/A	Confirmed	N/A
45	Processed	190522-045		Unknown		1044									SCN-Bimane IS	T1C1	Internal Standard	505	1486	2.23	2.23	0.00		M+	N/A	N/A	N/A	N/A	126.1	126.1	-.002 (mmu)	N/A	N/A	N/A	Method	True	False	N/A	N/A	N/A			Pass	Pass	N/A	N/A	N/A	Confirmed	N/A
46	Processed	190522-046		Unknown		1045									SCN-Bimane	T1	Target Compound	34	33	2.23	2.22	-0.01		M+	0.118	N/A	0.118	N/A	111	111	.000 (mmu)	0.014	1	2326	Method	True	False	N/A	N/A	N/A			Pass	Fail	N/A	N/A	N/A	Identified	N/A
46	Processed	190522-046		Unknown		1045									SCN-Bimane	T1C1	Target Compound	N/F	N/F	2.22	N/A	N/A		M+	N/A	N/A	N/A	N/A	124.1	N/F	N/A	0.014	N/A	N/A	Method	True	False	N/A	N/A	N/A			Fail	Fail	N/A	N/A	N/A	NotFound	N/A
46	Processed	190522-046		Unknown		1045									SCN-Bimane IS	T1	Internal Standard	806	2326	2.24	2.23	-0.01		M+	1	1	1	N/A	111	111	.000 (mmu)	N/A	N/A	N/A	Method	True	False	N/A	N/A	N/A			Pass	Pass	N/A	N/A	N/A	Confirmed	N/A
46	Processed	190522-046		Unknown		1045									SCN-Bimane IS	T1C1	Internal Standard	478	1456	2.23	2.23	0.00		M+	N/A	N/A	N/A	N/A	126.1	126.1	-.002 (mmu)	N/A	N/A	N/A	Method	True	False	N/A	N/A	N/A			Pass	Pass	N/A	N/A	N/A	Confirmed	N/A
47	Processed	190522-047		Unknown		1046									SCN-Bimane	T1	Target Compound	1221	2642	2.23	2.24	0.01		M+	33.316	N/A	33.316	N/A	111	111	.000 (mmu)	1.477	1	1789	Method	True	False	N/A	N/A	N/A			Pass	Pass	N/A	N/A	N/A	Confirmed	N/A
47	Processed	190522-047		Unknown		1046									SCN-Bimane	T1C1	Target Compound	625	1528	2.24	2.22	0.01		M+	N/A	N/A	N/A	N/A	124.1	124.1	-.002 (mmu)	1.477	N/A	N/A	Method	True	False	N/A	N/A	N/A			Pass	Pass	N/A	N/A	N/A	Confirmed	N/A
47	Processed	190522-047		Unknown		1046									SCN-Bimane IS	T1	Internal Standard	630	1789	2.24	2.24	0.00		M+	1	1	1	N/A	111	111	.000 (mmu)	N/A	N/A	N/A	Method	True	False	N/A	N/A	N/A			Pass	Pass	N/A	N/A	N/A	Confirmed	N/A
47	Processed	190522-047		Unknown		1046									SCN-Bimane IS	T1C1	Internal Standard	497	1202	2.24	2.23	0.01		M+	N/A	N/A	N/A	N/A	126.1	126.1	-.002 (mmu)	N/A	N/A	N/A	Method	True	False	N/A	N/A	N/A			Pass	Pass	N/A	N/A	N/A	Confirmed	N/A
48	Processed	190522-048		Unknown		1047									SCN-Bimane	T1	Target Compound	1262	3064	2.23	2.24	0.01		M+	38.076	N/A	38.076	N/A	111	111	.000 (mmu)	1.687	1	1817	Method	True	False	N/A	N/A	N/A			Pass	Pass	N/A	N/A	N/A	Confirmed	N/A
48	Processed	190522-048		Unknown		1047									SCN-Bimane	T1C1	Target Compound	558	1313	2.24	2.24	0.00		M+	N/A	N/A	N/A	N/A	124.1	124.1	-.002 (mmu)	1.687	N/A	N/A	Method	True	False	N/A	N/A	N/A			Pass	Pass	N/A	N/A	N/A	Confirmed	N/A
48	Processed	190522-048		Unknown		1047									SCN-Bimane IS	T1	Internal Standard	728	1817	2.24	2.24	0.00		M+	1	1	1	N/A	111	111	.000 (mmu)	N/A	N/A	N/A	Method	True	False	N/A	N/A	N/A			Pass	Pass	N/A	N/A	N/A	Confirmed	N/A
48	Processed	190522-048		Unknown		1047									SCN-Bimane IS	T1C1	Internal Standard	323	1011	2.24	2.24	0.00		M+	N/A	N/A	N/A	N/A	126.1	126.1	-.002 (mmu)	N/A	N/A	N/A	Method	True	False	N/A	N/A	N/A			Pass	Pass	N/A	N/A	N/A	Confirmed	N/A
49	Processed	190522-049		Unknown		1048									SCN-Bimane	T1	Target Compound	16	6	2.23	2.23	0.00		M+	-0.102	N/A	-0.102	N/A	111	111	.000 (mmu)	0.004	1	1464	Method	True	False	N/A	N/A	N/A			Pass	Fail	N/A	N/A	N/A	Identified	N/A
49	Processed	190522-049		Unknown		1048									SCN-Bimane	T1C1	Target Compound	26	31	2.23	2.24	-0.01		M+	N/A	N/A	N/A	N/A	124.1	124.1	-.002 (mmu)	0.004	N/A	N/A	Method	True	False	N/A	N/A	N/A			Pass	Fail	N/A	N/A	N/A	Identified	N/A
49	Processed	190522-049		Unknown		1048									SCN-Bimane IS	T1	Internal Standard	540	1464	2.24	2.24	0.00		M+	1	1	1	N/A	111	111	.000 (mmu)	N/A	N/A	N/A	Method	True	False	N/A	N/A	N/A			Pass	Pass	N/A	N/A	N/A	Confirmed	N/A
49	Processed	190522-049		Unknown		1048									SCN-Bimane IS	T1C1	Internal Standard	296	1041	2.24	2.24	0.00		M+	N/A	N/A	N/A	N/A	126.1	126.1	-.002 (mmu)	N/A	N/A	N/A	Method	True	False	N/A	N/A	N/A			Pass	Pass	N/A	N/A	N/A	Confirmed	N/A
50	Processed	190522-050		Unknown		1049									SCN-Bimane	T1	Target Compound	15	8	2.23	2.25	0.02		M+	-0.057	N/A	-0.057	N/A	111	111	.000 (mmu)	0.006	1	1262	Method	True	False	N/A	N/A	N/A			Pass	Fail	N/A	N/A	N/A	Identified	N/A
50	Processed	190522-050		Unknown		1049									SCN-Bimane	T1C1	Target Compound	5	2	2.25	2.24	0.01		M+	N/A	N/A	N/A	N/A	124.1	124.1	-.002 (mmu)	0.006	N/A	N/A	Method	True	False	N/A	N/A	N/A			Pass	Fail	N/A	N/A	N/A	Identified	N/A
50	Processed	190522-050		Unknown		1049									SCN-Bimane IS	T1	Internal Standard	483	1262	2.24	2.23	-0.01		M+	1	1	1	N/A	111	111	.000 (mmu)	N/A	N/A	N/A	Method	True	False	N/A	N/A	N/A			Pass	Pass	N/A	N/A	N/A	Confirmed	N/A
50	Processed	190522-050		Unknown		1049									SCN-Bimane IS	T1C1	Internal Standard	292	971	2.23	2.23	0.00		M+	N/A	N/A	N/A	N/A	126.1	126.1	-.002 (mmu)	N/A	N/A	N/A	Method	True	False	N/A	N/A	N/A			Pass	Pass	N/A	N/A	N/A	Confirmed	N/A
51	Processed	190522-051		Unknown		1050									SCN-Bimane	T1	Target Compound	268	516	2.23	2.24	0.01		M+	8.744	N/A	8.744	N/A	111	111	.000 (mmu)	0.394	1	1309	Method	True	False	N/A	N/A	N/A			Pass	Pass	N/A	N/A	N/A	Confirmed	N/A
51	Processed	190522-051		Unknown		1050									SCN-Bimane	T1C1	Target Compound	134	247	2.24	2.23	0.01		M+	N/A	N/A	N/A	N/A	124.1	124.1	-.002 (mmu)	0.394	N/A	N/A	Method	True	False	N/A	N/A	N/A			Pass	Pass	N/A	N/A	N/A	Confirmed	N/A
51	Processed	190522-051		Unknown		1050									SCN-Bimane IS	T1	Internal Standard	647	1309	2.24	2.23	-0.01		M+	1	1	1	N/A	111	111	.000 (mmu)	N/A	N/A	N/A	Method	True	False	N/A	N/A	N/A			Pass	Fail	N/A	N/A	N/A	Identified	N/A
51	Processed	190522-051		Unknown		1050									SCN-Bimane IS	T1C1	Internal Standard	377	1057	2.23	2.23	0.00		M+	N/A	N/A	N/A	N/A	126.1	126.1	-.002 (mmu)	N/A	N/A	N/A	Method	True	False	N/A	N/A	N/A			Pass	Fail	N/A	N/A	N/A	Identified	N/A
52	Processed	190522-052		Unknown		1051									SCN-Bimane	T1	Target Compound	289	496	2.23	2.22	-0.01		M+	7.161	N/A	7.161	N/A	111	111	.000 (mmu)	0.324	1	1528	Method	True	False	N/A	N/A	N/A			Pass	Fail	N/A	N/A	N/A	Identified	N/A
52	Processed	190522-052		Unknown		1051									SCN-Bimane	T1C1	Target Compound	99	181	2.22	2.23	-0.01		M+	N/A	N/A	N/A	N/A	124.1	124.1	-.002 (mmu)	0.324	N/A	N/A	Method	True	False	N/A	N/A	N/A			Pass	Fail	N/A	N/A	N/A	Identified	N/A
52	Processed	190522-052		Unknown		1051									SCN-Bimane IS	T1	Internal Standard	567	1528	2.24	2.24	0.00		M+	1	1	1	N/A	111	111	.000 (mmu)	N/A	N/A	N/A	Method	True	False	N/A	N/A	N/A			Pass	Pass	N/A	N/A	N/A	Confirmed	N/A
52	Processed	190522-052		Unknown		1051									SCN-Bimane IS	T1C1	Internal Standard	315	957	2.24	2.24	0.00		M+	N/A	N/A	N/A	N/A	126.1	126.1	-.002 (mmu)	N/A	N/A	N/A	Method	True	False	N/A	N/A	N/A			Pass	Pass	N/A	N/A	N/A	Confirmed	N/A
53	Processed	190522-053		Unknown		1052									SCN-Bimane	T1	Target Compound	1525	4215	2.23	2.23	0.00		M+	59.254	N/A	59.254	N/A	111	111	.000 (mmu)	2.62	1	1609	Method	True	False	N/A	N/A	N/A			Pass	Pass	N/A	N/A	N/A	Confirmed	N/A
53	Processed	190522-053		Unknown		1052									SCN-Bimane	T1C1	Target Compound	736	1705	2.23	2.24	-0.01		M+	N/A	N/A	N/A	N/A	124.1	124.1	-.002 (mmu)	2.62	N/A	N/A	Method	True	False	N/A	N/A	N/A			Pass	Pass	N/A	N/A	N/A	Confirmed	N/A
53	Processed	190522-053		Unknown		1052									SCN-Bimane IS	T1	Internal Standard	643	1609	2.24	2.24	0.00		M+	1	1	1	N/A	111	111	.000 (mmu)	N/A	N/A	N/A	Method	True	False	N/A	N/A	N/A			Pass	Pass	N/A	N/A	N/A	Confirmed	N/A
53	Processed	190522-053		Unknown		1052									SCN-Bimane IS	T1C1	Internal Standard	502	1220	2.24	2.23	0.00		M+	N/A	N/A	N/A	N/A	126.1	126.1	-.002 (mmu)	N/A	N/A	N/A	Method	True	False	N/A	N/A	N/A			Pass	Pass	N/A	N/A	N/A	Confirmed	N/A
54	Processed	190522-054		Unknown		1053									SCN-Bimane	T1	Target Compound	2114	5186	2.23	2.23	0.00		M+	67.8	N/A	67.8	N/A	111	111	.000 (mmu)	2.996	1	1731	Method	True	False	N/A	N/A	N/A			Pass	Pass	N/A	N/A	N/A	Confirmed	N/A
54	Processed	190522-054		Unknown		1053									SCN-Bimane	T1C1	Target Compound	1082	2412	2.23	2.23	0.00		M+	N/A	N/A	N/A	N/A	124.1	124.1	-.002 (mmu)	2.996	N/A	N/A	Method	True	False	N/A	N/A	N/A			Pass	Pass	N/A	N/A	N/A	Confirmed	N/A
54	Processed	190522-054		Unknown		1053									SCN-Bimane IS	T1	Internal Standard	826	1731	2.24	2.23	-0.01		M+	1	1	1	N/A	111	111	.000 (mmu)	N/A	N/A	N/A	Method	True	False	N/A	N/A	N/A			Pass	Pass	N/A	N/A	N/A	Confirmed	N/A
54	Processed	190522-054		Unknown		1053									SCN-Bimane IS	T1C1	Internal Standard	363	1209	2.23	2.24	-0.01		M+	N/A	N/A	N/A	N/A	126.1	126.1	-.002 (mmu)	N/A	N/A	N/A	Method	True	False	N/A	N/A	N/A			Pass	Pass	N/A	N/A	N/A	Confirmed	N/A
55	Processed	190522-055		Unknown		1054									SCN-Bimane	T1	Target Compound	685	1862	2.23	2.23	0.00		M+	22.727	N/A	22.727	N/A	111	111	.000 (mmu)	1.01	1	1843	Method	True	False	N/A	N/A	N/A			Pass	Pass	N/A	N/A	N/A	Confirmed	N/A
55	Processed	190522-055		Unknown		1054									SCN-Bimane	T1C1	Target Compound	356	874	2.23	2.23	0.00		M+	N/A	N/A	N/A	N/A	124.1	124.1	-.002 (mmu)	1.01	N/A	N/A	Method	True	False	N/A	N/A	N/A			Pass	Pass	N/A	N/A	N/A	Confirmed	N/A
55	Processed	190522-055		Unknown		1054									SCN-Bimane IS	T1	Internal Standard	774	1843	2.24	2.24	0.00		M+	1	1	1	N/A	111	111	.000 (mmu)	N/A	N/A	N/A	Method	True	False	N/A	N/A	N/A			Pass	Pass	N/A	N/A	N/A	Confirmed	N/A
55	Processed	190522-055		Unknown		1054									SCN-Bimane IS	T1C1	Internal Standard	662	1351	2.24	2.24	0.00		M+	N/A	N/A	N/A	N/A	126.1	126.1	-.002 (mmu)	N/A	N/A	N/A	Method	True	False	N/A	N/A	N/A			Pass	Pass	N/A	N/A	N/A	Confirmed	N/A
56	Processed	190522-056		Unknown		1055									SCN-Bimane	T1	Target Compound	795	1926	2.23	2.24	0.01		M+	21.452	N/A	21.452	N/A	111	111	.000 (mmu)	0.954	1	2019	Method	True	False	N/A	N/A	N/A			Pass	Pass	N/A	N/A	N/A	Confirmed	N/A
56	Processed	190522-056		Unknown		1055									SCN-Bimane	T1C1	Target Compound	327	1028	2.24	2.23	0.01		M+	N/A	N/A	N/A	N/A	124.1	124.1	-.002 (mmu)	0.954	N/A	N/A	Method	True	False	N/A	N/A	N/A			Pass	Pass	N/A	N/A	N/A	Confirmed	N/A
56	Processed	190522-056		Unknown		1055									SCN-Bimane IS	T1	Internal Standard	780	2019	2.24	2.24	0.00		M+	1	1	1	N/A	111	111	.000 (mmu)	N/A	N/A	N/A	Method	True	False	N/A	N/A	N/A			Pass	Pass	N/A	N/A	N/A	Confirmed	N/A
56	Processed	190522-056		Unknown		1055									SCN-Bimane IS	T1C1	Internal Standard	371	1342	2.24	2.23	0.01		M+	N/A	N/A	N/A	N/A	126.1	126.1	-.002 (mmu)	N/A	N/A	N/A	Method	True	False	N/A	N/A	N/A			Pass	Pass	N/A	N/A	N/A	Confirmed	N/A
57	Processed	190522-057		Unknown		1056									SCN-Bimane	T1	Target Compound	62	62	2.23	2.23	0.00		M+	0.54	N/A	0.54	N/A	111	111	.000 (mmu)	0.033	1	1900	Method	True	False	N/A	N/A	N/A			Pass	Pass	N/A	N/A	N/A	Confirmed	N/A
57	Processed	190522-057		Unknown		1056									SCN-Bimane	T1C1	Target Compound	24	34	2.23	2.24	0.00		M+	N/A	N/A	N/A	N/A	124.1	124.1	-.002 (mmu)	0.033	N/A	N/A	Method	True	False	N/A	N/A	N/A			Pass	Pass	N/A	N/A	N/A	Confirmed	N/A
57	Processed	190522-057		Unknown		1056									SCN-Bimane IS	T1	Internal Standard	806	1900	2.24	2.23	-0.01		M+	1	1	1	N/A	111	111	.000 (mmu)	N/A	N/A	N/A	Method	True	False	N/A	N/A	N/A			Pass	Pass	N/A	N/A	N/A	Confirmed	N/A
57	Processed	190522-057		Unknown		1056									SCN-Bimane IS	T1C1	Internal Standard	465	1216	2.23	2.23	0.00		M+	N/A	N/A	N/A	N/A	126.1	126.1	-.002 (mmu)	N/A	N/A	N/A	Method	True	False	N/A	N/A	N/A			Pass	Pass	N/A	N/A	N/A	Confirmed	N/A
58	Processed	190522-058		Unknown		1057									SCN-Bimane	T1	Target Compound	63	91	2.23	2.23	0.00		M+	0.858	N/A	0.858	N/A	111	111	.000 (mmu)	0.047	1	1954	Method	True	False	N/A	N/A	N/A			Pass	Fail	N/A	N/A	N/A	Identified	N/A
58	Processed	190522-058		Unknown		1057									SCN-Bimane	T1C1	Target Compound	38	32	2.23	2.23	-0.01		M+	N/A	N/A	N/A	N/A	124.1	124.1	-.002 (mmu)	0.047	N/A	N/A	Method	True	False	N/A	N/A	N/A			Pass	Fail	N/A	N/A	N/A	Identified	N/A
58	Processed	190522-058		Unknown		1057									SCN-Bimane IS	T1	Internal Standard	822	1954	2.24	2.24	0.00		M+	1	1	1	N/A	111	111	.000 (mmu)	N/A	N/A	N/A	Method	True	False	N/A	N/A	N/A			Pass	Pass	N/A	N/A	N/A	Confirmed	N/A
58	Processed	190522-058		Unknown		1057									SCN-Bimane IS	T1C1	Internal Standard	430	1323	2.24	2.23	0.01		M+	N/A	N/A	N/A	N/A	126.1	126.1	-.002 (mmu)	N/A	N/A	N/A	Method	True	False	N/A	N/A	N/A			Pass	Pass	N/A	N/A	N/A	Confirmed	N/A
59	Processed	190522-059		Unknown		1058									SCN-Bimane	T1	Target Compound	4	3	2.23	2.18	-0.05		M+	-0.167	N/A	-0.167	N/A	111	111	.000 (mmu)	0.001	1	1756	Method	True	False	N/A	N/A	N/A			Pass	Fail	N/A	N/A	N/A	Identified	N/A
59	Processed	190522-059		Unknown		1058									SCN-Bimane	T1C1	Target Compound	5	2	2.18	2.17	0.00		M+	N/A	N/A	N/A	N/A	124.1	124.1	-.002 (mmu)	0.001	N/A	N/A	Method	True	False	N/A	N/A	N/A			Pass	Fail	N/A	N/A	N/A	Identified	N/A
59	Processed	190522-059		Unknown		1058									SCN-Bimane IS	T1	Internal Standard	720	1756	2.24	2.23	-0.01		M+	1	1	1	N/A	111	111	.000 (mmu)	N/A	N/A	N/A	Method	True	False	N/A	N/A	N/A			Pass	Pass	N/A	N/A	N/A	Confirmed	N/A
59	Processed	190522-059		Unknown		1058									SCN-Bimane IS	T1C1	Internal Standard	448	1273	2.23	2.23	0.00		M+	N/A	N/A	N/A	N/A	126.1	126.1	-.002 (mmu)	N/A	N/A	N/A	Method	True	False	N/A	N/A	N/A			Pass	Pass	N/A	N/A	N/A	Confirmed	N/A
60	Processed	190522-060		Unknown		1059									SCN-Bimane	T1	Target Compound	12	5	2.23	2.23	0.00		M+	-0.15	N/A	-0.15	N/A	111	111	.000 (mmu)	0.002	1	2305	Method	True	False	N/A	N/A	N/A			Pass	Fail	N/A	N/A	N/A	Identified	N/A
60	Processed	190522-060		Unknown		1059									SCN-Bimane	T1C1	Target Compound	44	46	2.23	2.24	0.00		M+	N/A	N/A	N/A	N/A	124.1	124.1	-.002 (mmu)	0.002	N/A	N/A	Method	True	False	N/A	N/A	N/A			Pass	Fail	N/A	N/A	N/A	Identified	N/A
60	Processed	190522-060		Unknown		1059									SCN-Bimane IS	T1	Internal Standard	879	2305	2.24	2.24	0.00		M+	1	1	1	N/A	111	111	.000 (mmu)	N/A	N/A	N/A	Method	True	False	N/A	N/A	N/A			Pass	Pass	N/A	N/A	N/A	Confirmed	N/A
60	Processed	190522-060		Unknown		1059									SCN-Bimane IS	T1C1	Internal Standard	607	1749	2.24	2.24	0.00		M+	N/A	N/A	N/A	N/A	126.1	126.1	-.002 (mmu)	N/A	N/A	N/A	Method	True	False	N/A	N/A	N/A			Pass	Pass	N/A	N/A	N/A	Confirmed	N/A
61	Processed	190522-061		Unknown		1060									SCN-Bimane	T1	Target Compound	1452	3508	2.23	2.23	0.00		M+	37.673	N/A	37.673	N/A	111	111	.000 (mmu)	1.669	1	2102	Method	True	False	N/A	N/A	N/A			Pass	Pass	N/A	N/A	N/A	Confirmed	N/A
61	Processed	190522-061		Unknown		1060									SCN-Bimane	T1C1	Target Compound	808	1937	2.23	2.23	0.00		M+	N/A	N/A	N/A	N/A	124.1	124.1	-.002 (mmu)	1.669	N/A	N/A	Method	True	False	N/A	N/A	N/A			Pass	Pass	N/A	N/A	N/A	Confirmed	N/A
61	Processed	190522-061		Unknown		1060									SCN-Bimane IS	T1	Internal Standard	797	2102	2.24	2.23	-0.01		M+	1	1	1	N/A	111	111	.000 (mmu)	N/A	N/A	N/A	Method	True	False	N/A	N/A	N/A			Pass	Pass	N/A	N/A	N/A	Confirmed	N/A
61	Processed	190522-061		Unknown		1060									SCN-Bimane IS	T1C1	Internal Standard	386	1258	2.23	2.24	-0.01		M+	N/A	N/A	N/A	N/A	126.1	126.1	-.002 (mmu)	N/A	N/A	N/A	Method	True	False	N/A	N/A	N/A			Pass	Pass	N/A	N/A	N/A	Confirmed	N/A
62	Processed	190522-062		Unknown		1061									SCN-Bimane	T1	Target Compound	1771	4080	2.23	2.23	0.00		M+	49.028	N/A	49.028	N/A	111	111	.000 (mmu)	2.169	1	1881	Method	True	False	N/A	N/A	N/A			Pass	Pass	N/A	N/A	N/A	Confirmed	N/A
62	Processed	190522-062		Unknown		1061									SCN-Bimane	T1C1	Target Compound	797	1676	2.23	2.24	-0.01		M+	N/A	N/A	N/A	N/A	124.1	124.1	-.002 (mmu)	2.169	N/A	N/A	Method	True	False	N/A	N/A	N/A			Pass	Pass	N/A	N/A	N/A	Confirmed	N/A
62	Processed	190522-062		Unknown		1061									SCN-Bimane IS	T1	Internal Standard	836	1881	2.24	2.24	0.00		M+	1	1	1	N/A	111	111	.000 (mmu)	N/A	N/A	N/A	Method	True	False	N/A	N/A	N/A			Pass	Fail	N/A	N/A	N/A	Identified	N/A
62	Processed	190522-062		Unknown		1061									SCN-Bimane IS	T1C1	Internal Standard	421	934	2.24	2.23	0.00		M+	N/A	N/A	N/A	N/A	126.1	126.1	-.002 (mmu)	N/A	N/A	N/A	Method	True	False	N/A	N/A	N/A			Pass	Fail	N/A	N/A	N/A	Identified	N/A
63	Processed	190522-063		Unknown		1062									SCN-Bimane	T1	Target Compound	79	105	2.23	2.24	0.01		M+	1.234	N/A	1.234	N/A	111	111	.000 (mmu)	0.063	1	1669	Method	True	False	N/A	N/A	N/A			Pass	Pass	N/A	N/A	N/A	Confirmed	N/A
63	Processed	190522-063		Unknown		1062									SCN-Bimane	T1C1	Target Compound	54	58	2.24	2.23	0.01		M+	N/A	N/A	N/A	N/A	124.1	124.1	-.002 (mmu)	0.063	N/A	N/A	Method	True	False	N/A	N/A	N/A			Pass	Pass	N/A	N/A	N/A	Confirmed	N/A
63	Processed	190522-063		Unknown		1062									SCN-Bimane IS	T1	Internal Standard	788	1669	2.24	2.24	0.00		M+	1	1	1	N/A	111	111	.000 (mmu)	N/A	N/A	N/A	Method	True	False	N/A	N/A	N/A			Pass	Pass	N/A	N/A	N/A	Confirmed	N/A
63	Processed	190522-063		Unknown		1062									SCN-Bimane IS	T1C1	Internal Standard	330	1052	2.24	2.24	0.00		M+	N/A	N/A	N/A	N/A	126.1	126.1	-.002 (mmu)	N/A	N/A	N/A	Method	True	False	N/A	N/A	N/A			Pass	Pass	N/A	N/A	N/A	Confirmed	N/A
64	Processed	190522-064		Unknown		1063									SCN-Bimane	T1	Target Compound	23	20	2.23	2.21	-0.02		M+	0.06	N/A	0.06	N/A	111	111	.000 (mmu)	0.011	1	1720	Method	True	False	N/A	N/A	N/A			Pass	Fail	N/A	N/A	N/A	Identified	N/A
64	Processed	190522-064		Unknown		1063									SCN-Bimane	T1C1	Target Compound	17	13	2.21	2.23	-0.02		M+	N/A	N/A	N/A	N/A	124.1	124.1	-.002 (mmu)	0.011	N/A	N/A	Method	True	False	N/A	N/A	N/A			Pass	Fail	N/A	N/A	N/A	Identified	N/A
64	Processed	190522-064		Unknown		1063									SCN-Bimane IS	T1	Internal Standard	705	1720	2.24	2.23	-0.01		M+	1	1	1	N/A	111	111	.000 (mmu)	N/A	N/A	N/A	Method	True	False	N/A	N/A	N/A			Pass	Fail	N/A	N/A	N/A	Identified	N/A
64	Processed	190522-064		Unknown		1063									SCN-Bimane IS	T1C1	Internal Standard	335	826	2.23	2.23	0.00		M+	N/A	N/A	N/A	N/A	126.1	126.1	-.002 (mmu)	N/A	N/A	N/A	Method	True	False	N/A	N/A	N/A			Pass	Fail	N/A	N/A	N/A	Identified	N/A
65	Processed	190522-065		Unknown		1064									SCN-Bimane	T1	Target Compound	66	109	2.23	2.24	0.01		M+	1.299	N/A	1.299	N/A	111	111	.000 (mmu)	0.066	1	1655	Method	True	False	N/A	N/A	N/A			Pass	Fail	N/A	N/A	N/A	Identified	N/A
65	Processed	190522-065		Unknown		1064									SCN-Bimane	T1C1	Target Compound	36	27	2.24	2.22	0.02		M+	N/A	N/A	N/A	N/A	124.1	124.1	-.002 (mmu)	0.066	N/A	N/A	Method	True	False	N/A	N/A	N/A			Pass	Fail	N/A	N/A	N/A	Identified	N/A
65	Processed	190522-065		Unknown		1064									SCN-Bimane IS	T1	Internal Standard	665	1655	2.24	2.23	-0.01		M+	1	1	1	N/A	111	111	.000 (mmu)	N/A	N/A	N/A	Method	True	False	N/A	N/A	N/A			Pass	Pass	N/A	N/A	N/A	Confirmed	N/A
65	Processed	190522-065		Unknown		1064									SCN-Bimane IS	T1C1	Internal Standard	496	1190	2.23	2.24	-0.01		M+	N/A	N/A	N/A	N/A	126.1	126.1	-.002 (mmu)	N/A	N/A	N/A	Method	True	False	N/A	N/A	N/A			Pass	Pass	N/A	N/A	N/A	Confirmed	N/A
66	Processed	190522-066		Unknown		1065									SCN-Bimane	T1	Target Compound	41	85	2.23	2.25	0.02		M+	0.711	N/A	0.711	N/A	111	111	.000 (mmu)	0.04	1	2120	Method	True	False	N/A	N/A	N/A			Pass	Fail	N/A	N/A	N/A	Identified	N/A
66	Processed	190522-066		Unknown		1065									SCN-Bimane	T1C1	Target Compound	11	15	2.25	2.24	0.01		M+	N/A	N/A	N/A	N/A	124.1	124.1	-.002 (mmu)	0.04	N/A	N/A	Method	True	False	N/A	N/A	N/A			Pass	Fail	N/A	N/A	N/A	Identified	N/A
66	Processed	190522-066		Unknown		1065									SCN-Bimane IS	T1	Internal Standard	914	2120	2.24	2.24	0.00		M+	1	1	1	N/A	111	111	.000 (mmu)	N/A	N/A	N/A	Method	True	False	N/A	N/A	N/A			Pass	Pass	N/A	N/A	N/A	Confirmed	N/A
66	Processed	190522-066		Unknown		1065									SCN-Bimane IS	T1C1	Internal Standard	433	1399	2.24	2.23	0.01		M+	N/A	N/A	N/A	N/A	126.1	126.1	-.002 (mmu)	N/A	N/A	N/A	Method	True	False	N/A	N/A	N/A			Pass	Pass	N/A	N/A	N/A	Confirmed	N/A
67	Processed	190522-067		Unknown		1066									SCN-Bimane	T1	Target Compound	2364	6076	2.23	2.24	0.01		M+	64.543	N/A	64.543	N/A	111	111	.000 (mmu)	2.853	1	2130	Method	True	False	N/A	N/A	N/A			Pass	Pass	N/A	N/A	N/A	Confirmed	N/A
67	Processed	190522-067		Unknown		1066									SCN-Bimane	T1C1	Target Compound	1387	3106	2.24	2.23	0.01		M+	N/A	N/A	N/A	N/A	124.1	124.1	-.002 (mmu)	2.853	N/A	N/A	Method	True	False	N/A	N/A	N/A			Pass	Pass	N/A	N/A	N/A	Confirmed	N/A
67	Processed	190522-067		Unknown		1066									SCN-Bimane IS	T1	Internal Standard	876	2130	2.24	2.23	-0.01		M+	1	1	1	N/A	111	111	.000 (mmu)	N/A	N/A	N/A	Method	True	False	N/A	N/A	N/A			Pass	Pass	N/A	N/A	N/A	Confirmed	N/A
67	Processed	190522-067		Unknown		1066									SCN-Bimane IS	T1C1	Internal Standard	445	1619	2.23	2.22	0.01		M+	N/A	N/A	N/A	N/A	126.1	126.1	-.002 (mmu)	N/A	N/A	N/A	Method	True	False	N/A	N/A	N/A			Pass	Pass	N/A	N/A	N/A	Confirmed	N/A
68	Processed	190522-068		Unknown		1067									SCN-Bimane	T1	Target Compound	2610	5824	2.23	2.24	0.01		M+	61.135	N/A	61.135	N/A	111	111	.000 (mmu)	2.703	1	2155	Method	True	False	N/A	N/A	N/A			Pass	Pass	N/A	N/A	N/A	Confirmed	N/A
68	Processed	190522-068		Unknown		1067									SCN-Bimane	T1C1	Target Compound	1197	2914	2.24	2.23	0.01		M+	N/A	N/A	N/A	N/A	124.1	124.1	-.002 (mmu)	2.703	N/A	N/A	Method	True	False	N/A	N/A	N/A			Pass	Pass	N/A	N/A	N/A	Confirmed	N/A
68	Processed	190522-068		Unknown		1067									SCN-Bimane IS	T1	Internal Standard	840	2155	2.24	2.24	0.00		M+	1	1	1	N/A	111	111	.000 (mmu)	N/A	N/A	N/A	Method	True	False	N/A	N/A	N/A			Pass	Pass	N/A	N/A	N/A	Confirmed	N/A
68	Processed	190522-068		Unknown		1067									SCN-Bimane IS	T1C1	Internal Standard	596	1412	2.24	2.23	0.01		M+	N/A	N/A	N/A	N/A	126.1	126.1	-.002 (mmu)	N/A	N/A	N/A	Method	True	False	N/A	N/A	N/A			Pass	Pass	N/A	N/A	N/A	Confirmed	N/A
69	Processed	190522-069		Unknown		1068									SCN-Bimane	T1	Target Compound	594	1374	2.23	2.24	0.01		M+	13.085	N/A	13.085	N/A	111	111	.000 (mmu)	0.585	1	2347	Method	True	False	N/A	N/A	N/A			Pass	Pass	N/A	N/A	N/A	Confirmed	N/A
69	Processed	190522-069		Unknown		1068									SCN-Bimane	T1C1	Target Compound	201	567	2.24	2.24	0.00		M+	N/A	N/A	N/A	N/A	124.1	124.1	-.002 (mmu)	0.585	N/A	N/A	Method	True	False	N/A	N/A	N/A			Pass	Pass	N/A	N/A	N/A	Confirmed	N/A
69	Processed	190522-069		Unknown		1068									SCN-Bimane IS	T1	Internal Standard	1011	2347	2.24	2.23	-0.01		M+	1	1	1	N/A	111	111	.000 (mmu)	N/A	N/A	N/A	Method	True	False	N/A	N/A	N/A			Pass	Pass	N/A	N/A	N/A	Confirmed	N/A
69	Processed	190522-069		Unknown		1068									SCN-Bimane IS	T1C1	Internal Standard	527	1349	2.23	2.23	0.00		M+	N/A	N/A	N/A	N/A	126.1	126.1	-.002 (mmu)	N/A	N/A	N/A	Method	True	False	N/A	N/A	N/A			Pass	Pass	N/A	N/A	N/A	Confirmed	N/A
70	Processed	190522-070		Unknown		1069									SCN-Bimane	T1	Target Compound	542	1340	2.23	2.23	0.00		M+	16.015	N/A	16.015	N/A	111	111	.000 (mmu)	0.714	1	1876	Method	True	False	N/A	N/A	N/A			Pass	Pass	N/A	N/A	N/A	Confirmed	N/A
70	Processed	190522-070		Unknown		1069									SCN-Bimane	T1C1	Target Compound	316	609	2.23	2.23	0.00		M+	N/A	N/A	N/A	N/A	124.1	124.1	-.002 (mmu)	0.714	N/A	N/A	Method	True	False	N/A	N/A	N/A			Pass	Pass	N/A	N/A	N/A	Confirmed	N/A
70	Processed	190522-070		Unknown		1069									SCN-Bimane IS	T1	Internal Standard	728	1876	2.24	2.23	-0.01		M+	1	1	1	N/A	111	111	.000 (mmu)	N/A	N/A	N/A	Method	True	False	N/A	N/A	N/A			Pass	Pass	N/A	N/A	N/A	Confirmed	N/A
70	Processed	190522-070		Unknown		1069									SCN-Bimane IS	T1C1	Internal Standard	431	1196	2.23	2.23	0.00		M+	N/A	N/A	N/A	N/A	126.1	126.1	-.002 (mmu)	N/A	N/A	N/A	Method	True	False	N/A	N/A	N/A			Pass	Pass	N/A	N/A	N/A	Confirmed	N/A
71	Processed	190522-071		Unknown		1070									SCN-Bimane	T1	Target Compound	112	286	2.23	2.23	0.00		M+	2.881	N/A	2.881	N/A	111	111	.000 (mmu)	0.136	1	2105	Method	True	False	N/A	N/A	N/A			Pass	Pass	N/A	N/A	N/A	Confirmed	N/A
71	Processed	190522-071		Unknown		1070									SCN-Bimane	T1C1	Target Compound	66	131	2.23	2.24	-0.02		M+	N/A	N/A	N/A	N/A	124.1	124.1	-.002 (mmu)	0.136	N/A	N/A	Method	True	False	N/A	N/A	N/A			Pass	Pass	N/A	N/A	N/A	Confirmed	N/A
71	Processed	190522-071		Unknown		1070									SCN-Bimane IS	T1	Internal Standard	1045	2105	2.24	2.23	-0.01		M+	1	1	1	N/A	111	111	.000 (mmu)	N/A	N/A	N/A	Method	True	False	N/A	N/A	N/A			Pass	Pass	N/A	N/A	N/A	Confirmed	N/A
71	Processed	190522-071		Unknown		1070									SCN-Bimane IS	T1C1	Internal Standard	430	1157	2.23	2.23	0.00		M+	N/A	N/A	N/A	N/A	126.1	126.1	-.002 (mmu)	N/A	N/A	N/A	Method	True	False	N/A	N/A	N/A			Pass	Pass	N/A	N/A	N/A	Confirmed	N/A
72	Processed	190522-072		Unknown		1071									SCN-Bimane	T1	Target Compound	196	419	2.23	2.24	0.01		M+	4.085	N/A	4.085	N/A	111	111	.000 (mmu)	0.189	1	2221	Method	True	False	N/A	N/A	N/A			Pass	Pass	N/A	N/A	N/A	Confirmed	N/A
72	Processed	190522-072		Unknown		1071									SCN-Bimane	T1C1	Target Compound	113	187	2.24	2.22	0.02		M+	N/A	N/A	N/A	N/A	124.1	124.1	-.002 (mmu)	0.189	N/A	N/A	Method	True	False	N/A	N/A	N/A			Pass	Pass	N/A	N/A	N/A	Confirmed	N/A
72	Processed	190522-072		Unknown		1071									SCN-Bimane IS	T1	Internal Standard	945	2221	2.24	2.23	-0.01		M+	1	1	1	N/A	111	111	.000 (mmu)	N/A	N/A	N/A	Method	True	False	N/A	N/A	N/A			Pass	Pass	N/A	N/A	N/A	Confirmed	N/A
72	Processed	190522-072		Unknown		1071									SCN-Bimane IS	T1C1	Internal Standard	386	1232	2.23	2.24	-0.01		M+	N/A	N/A	N/A	N/A	126.1	126.1	-.002 (mmu)	N/A	N/A	N/A	Method	True	False	N/A	N/A	N/A			Pass	Pass	N/A	N/A	N/A	Confirmed	N/A
73	Processed	190522-073		Unknown		1072									SCN-Bimane	T1	Target Compound	16	14	2.23	2.21	-0.02		M+	-0.016	N/A	-0.016	N/A	111	111	.000 (mmu)	0.008	1	1697	Method	True	False	N/A	N/A	N/A			Pass	Fail	N/A	N/A	N/A	Identified	N/A
73	Processed	190522-073		Unknown		1072									SCN-Bimane	T1C1	Target Compound	18	14	2.21	2.23	-0.02		M+	N/A	N/A	N/A	N/A	124.1	124.1	-.002 (mmu)	0.008	N/A	N/A	Method	True	False	N/A	N/A	N/A			Pass	Fail	N/A	N/A	N/A	Identified	N/A
73	Processed	190522-073		Unknown		1072									SCN-Bimane IS	T1	Internal Standard	745	1697	2.24	2.23	-0.01		M+	1	1	1	N/A	111	111	.000 (mmu)	N/A	N/A	N/A	Method	True	False	N/A	N/A	N/A			Pass	Pass	N/A	N/A	N/A	Confirmed	N/A
73	Processed	190522-073		Unknown		1072									SCN-Bimane IS	T1C1	Internal Standard	457	1270	2.23	2.23	0.00		M+	N/A	N/A	N/A	N/A	126.1	126.1	-.002 (mmu)	N/A	N/A	N/A	Method	True	False	N/A	N/A	N/A			Pass	Pass	N/A	N/A	N/A	Confirmed	N/A
74	Processed	190522-074		Unknown		1073									SCN-Bimane	T1	Target Compound	5	2	2.23	2.22	-0.01		M+	-0.179	N/A	-0.179	N/A	111	111	.000 (mmu)	0.001	1	2227	Method	True	False	N/A	N/A	N/A			Pass	Fail	N/A	N/A	N/A	Identified	N/A
74	Processed	190522-074		Unknown		1073									SCN-Bimane	T1C1	Target Compound	17	7	2.22	2.24	-0.02		M+	N/A	N/A	N/A	N/A	124.1	124.1	-.002 (mmu)	0.001	N/A	N/A	Method	True	False	N/A	N/A	N/A			Pass	Fail	N/A	N/A	N/A	Identified	N/A
74	Processed	190522-074		Unknown		1073									SCN-Bimane IS	T1	Internal Standard	852	2227	2.24	2.23	-0.01		M+	1	1	1	N/A	111	111	.000 (mmu)	N/A	N/A	N/A	Method	True	False	N/A	N/A	N/A			Pass	Pass	N/A	N/A	N/A	Confirmed	N/A
74	Processed	190522-074		Unknown		1073									SCN-Bimane IS	T1C1	Internal Standard	524	1326	2.23	2.23	0.01		M+	N/A	N/A	N/A	N/A	126.1	126.1	-.002 (mmu)	N/A	N/A	N/A	Method	True	False	N/A	N/A	N/A			Pass	Pass	N/A	N/A	N/A	Confirmed	N/A
75	Processed	190522-075		Unknown		1074									SCN-Bimane	T1	Target Compound	2157	5388	2.23	2.24	0.01		M+	49.294	N/A	49.294	N/A	111	111	.000 (mmu)	2.181	1	2471	Method	True	False	N/A	N/A	N/A			Pass	Pass	N/A	N/A	N/A	Confirmed	N/A
75	Processed	190522-075		Unknown		1074									SCN-Bimane	T1C1	Target Compound	1143	2661	2.24	2.23	0.00		M+	N/A	N/A	N/A	N/A	124.1	124.1	-.002 (mmu)	2.181	N/A	N/A	Method	True	False	N/A	N/A	N/A			Pass	Pass	N/A	N/A	N/A	Confirmed	N/A
75	Processed	190522-075		Unknown		1074									SCN-Bimane IS	T1	Internal Standard	928	2471	2.24	2.23	-0.01		M+	1	1	1	N/A	111	111	.000 (mmu)	N/A	N/A	N/A	Method	True	False	N/A	N/A	N/A			Pass	Pass	N/A	N/A	N/A	Confirmed	N/A
75	Processed	190522-075		Unknown		1074									SCN-Bimane IS	T1C1	Internal Standard	550	1520	2.23	2.23	0.00		M+	N/A	N/A	N/A	N/A	126.1	126.1	-.002 (mmu)	N/A	N/A	N/A	Method	True	False	N/A	N/A	N/A			Pass	Pass	N/A	N/A	N/A	Confirmed	N/A
76	Processed	190522-076		Unknown		1075									SCN-Bimane	T1	Target Compound	2108	4908	2.23	2.24	0.01		M+	42.153	N/A	42.153	N/A	111	111	.000 (mmu)	1.866	1	2630	Method	True	False	N/A	N/A	N/A			Pass	Pass	N/A	N/A	N/A	Confirmed	N/A
76	Processed	190522-076		Unknown		1075									SCN-Bimane	T1C1	Target Compound	821	2190	2.24	2.23	0.01		M+	N/A	N/A	N/A	N/A	124.1	124.1	-.002 (mmu)	1.866	N/A	N/A	Method	True	False	N/A	N/A	N/A			Pass	Pass	N/A	N/A	N/A	Confirmed	N/A
76	Processed	190522-076		Unknown		1075									SCN-Bimane IS	T1	Internal Standard	1170	2630	2.24	2.23	-0.01		M+	1	1	1	N/A	111	111	.000 (mmu)	N/A	N/A	N/A	Method	True	False	N/A	N/A	N/A			Pass	Pass	N/A	N/A	N/A	Confirmed	N/A
76	Processed	190522-076		Unknown		1075									SCN-Bimane IS	T1C1	Internal Standard	539	1655	2.23	2.24	-0.01		M+	N/A	N/A	N/A	N/A	126.1	126.1	-.002 (mmu)	N/A	N/A	N/A	Method	True	False	N/A	N/A	N/A			Pass	Pass	N/A	N/A	N/A	Confirmed	N/A
77	Processed	190522-077		Unknown		1076									SCN-Bimane	T1	Target Compound	60	91	2.23	2.23	0.00		M+	1.219	N/A	1.219	N/A	111	111	.000 (mmu)	0.063	1	1462	Method	True	False	N/A	N/A	N/A			Pass	Fail	N/A	N/A	N/A	Identified	N/A
77	Processed	190522-077		Unknown		1076									SCN-Bimane	T1C1	Target Compound	17	13	2.23	2.22	0.01		M+	N/A	N/A	N/A	N/A	124.1	124.1	-.002 (mmu)	0.063	N/A	N/A	Method	True	False	N/A	N/A	N/A			Pass	Fail	N/A	N/A	N/A	Identified	N/A
77	Processed	190522-077		Unknown		1076									SCN-Bimane IS	T1	Internal Standard	604	1462	2.24	2.24	0.00		M+	1	1	1	N/A	111	111	.000 (mmu)	N/A	N/A	N/A	Method	True	False	N/A	N/A	N/A			Pass	Pass	N/A	N/A	N/A	Confirmed	N/A
77	Processed	190522-077		Unknown		1076									SCN-Bimane IS	T1C1	Internal Standard	358	947	2.24	2.23	0.01		M+	N/A	N/A	N/A	N/A	126.1	126.1	-.002 (mmu)	N/A	N/A	N/A	Method	True	False	N/A	N/A	N/A			Pass	Pass	N/A	N/A	N/A	Confirmed	N/A
78	Processed	190522-078		Unknown		1077									SCN-Bimane	T1	Target Compound	53	44	2.23	2.26	0.03		M+	0.244	N/A	0.244	N/A	111	111	.000 (mmu)	0.02	1	2242	Method	True	False	N/A	N/A	N/A			Pass	Pass	N/A	N/A	N/A	Confirmed	N/A
78	Processed	190522-078		Unknown		1077									SCN-Bimane	T1C1	Target Compound	16	25	2.26	2.23	0.03		M+	N/A	N/A	N/A	N/A	124.1	124.1	-.002 (mmu)	0.02	N/A	N/A	Method	True	False	N/A	N/A	N/A			Pass	Pass	N/A	N/A	N/A	Confirmed	N/A
78	Processed	190522-078		Unknown		1077									SCN-Bimane IS	T1	Internal Standard	911	2242	2.24	2.23	-0.01		M+	1	1	1	N/A	111	111	.000 (mmu)	N/A	N/A	N/A	Method	True	False	N/A	N/A	N/A			Pass	Pass	N/A	N/A	N/A	Confirmed	N/A
78	Processed	190522-078		Unknown		1077									SCN-Bimane IS	T1C1	Internal Standard	485	1426	2.23	2.24	-0.01		M+	N/A	N/A	N/A	N/A	126.1	126.1	-.002 (mmu)	N/A	N/A	N/A	Method	True	False	N/A	N/A	N/A			Pass	Pass	N/A	N/A	N/A	Confirmed	N/A
79	Processed	190522-079		Unknown		1078									SCN-Bimane	T1	Target Compound	35	56	2.23	2.22	-0.01		M+	0.359	N/A	0.359	N/A	111	111	.000 (mmu)	0.025	1	2272	Method	True	False	N/A	N/A	N/A			Pass	Fail	N/A	N/A	N/A	Identified	N/A
79	Processed	190522-079		Unknown		1078									SCN-Bimane	T1C1	Target Compound	13	8	2.22	2.22	0.00		M+	N/A	N/A	N/A	N/A	124.1	124.1	-.002 (mmu)	0.025	N/A	N/A	Method	True	False	N/A	N/A	N/A			Pass	Fail	N/A	N/A	N/A	Identified	N/A
79	Processed	190522-079		Unknown		1078									SCN-Bimane IS	T1	Internal Standard	855	2272	2.24	2.23	-0.01		M+	1	1	1	N/A	111	111	.000 (mmu)	N/A	N/A	N/A	Method	True	False	N/A	N/A	N/A			Pass	Pass	N/A	N/A	N/A	Confirmed	N/A
79	Processed	190522-079		Unknown		1078									SCN-Bimane IS	T1C1	Internal Standard	556	1548	2.23	2.23	-0.01		M+	N/A	N/A	N/A	N/A	126.1	126.1	-.002 (mmu)	N/A	N/A	N/A	Method	True	False	N/A	N/A	N/A			Pass	Pass	N/A	N/A	N/A	Confirmed	N/A
80	Processed	190522-080		Unknown		1079									SCN-Bimane	T1	Target Compound	37	26	2.23	2.22	-0.01		M+	0.288	N/A	0.288	N/A	111	111	.000 (mmu)	0.022	1	1192	Method	True	False	N/A	N/A	N/A			Pass	Fail	N/A	N/A	N/A	Identified	N/A
80	Processed	190522-080		Unknown		1079									SCN-Bimane	T1C1	Target Compound	41	32	2.22	2.23	-0.01		M+	N/A	N/A	N/A	N/A	124.1	124.1	-.002 (mmu)	0.022	N/A	N/A	Method	True	False	N/A	N/A	N/A			Pass	Fail	N/A	N/A	N/A	Identified	N/A
80	Processed	190522-080		Unknown		1079									SCN-Bimane IS	T1	Internal Standard	512	1192	2.24	2.23	-0.01		M+	1	1	1	N/A	111	111	.000 (mmu)	N/A	N/A	N/A	Method	True	False	N/A	N/A	N/A			Pass	Pass	N/A	N/A	N/A	Confirmed	N/A
80	Processed	190522-080		Unknown		1079									SCN-Bimane IS	T1C1	Internal Standard	242	829	2.23	2.23	0.00		M+	N/A	N/A	N/A	N/A	126.1	126.1	-.002 (mmu)	N/A	N/A	N/A	Method	True	False	N/A	N/A	N/A			Pass	Pass	N/A	N/A	N/A	Confirmed	N/A
81	Processed	190522-081		Unknown		1080									SCN-Bimane	T1	Target Compound	2892	7604	2.23	2.24	0.01		M+	71.028	N/A	71.028	N/A	111	111	.000 (mmu)	3.139	1	2423	Method	True	False	N/A	N/A	N/A			Pass	Pass	N/A	N/A	N/A	Confirmed	N/A
81	Processed	190522-081		Unknown		1080									SCN-Bimane	T1C1	Target Compound	1201	3314	2.24	2.23	0.01		M+	N/A	N/A	N/A	N/A	124.1	124.1	-.002 (mmu)	3.139	N/A	N/A	Method	True	False	N/A	N/A	N/A			Pass	Pass	N/A	N/A	N/A	Confirmed	N/A
81	Processed	190522-081		Unknown		1080									SCN-Bimane IS	T1	Internal Standard	871	2423	2.24	2.24	0.00		M+	1	1	1	N/A	111	111	.000 (mmu)	N/A	N/A	N/A	Method	True	False	N/A	N/A	N/A			Pass	Pass	N/A	N/A	N/A	Confirmed	N/A
81	Processed	190522-081		Unknown		1080									SCN-Bimane IS	T1C1	Internal Standard	435	1287	2.24	2.24	0.00		M+	N/A	N/A	N/A	N/A	126.1	126.1	-.002 (mmu)	N/A	N/A	N/A	Method	True	False	N/A	N/A	N/A			Pass	Pass	N/A	N/A	N/A	Confirmed	N/A
82	Processed	190522-082		Unknown		1081									SCN-Bimane	T1	Target Compound	2549	6369	2.23	2.24	0.01		M+	57.722	N/A	57.722	N/A	111	111	.000 (mmu)	2.552	1	2496	Method	True	False	N/A	N/A	N/A			Pass	Pass	N/A	N/A	N/A	Confirmed	N/A
82	Processed	190522-082		Unknown		1081									SCN-Bimane	T1C1	Target Compound	1262	3321	2.24	2.23	0.00		M+	N/A	N/A	N/A	N/A	124.1	124.1	-.002 (mmu)	2.552	N/A	N/A	Method	True	False	N/A	N/A	N/A			Pass	Pass	N/A	N/A	N/A	Confirmed	N/A
82	Processed	190522-082		Unknown		1081									SCN-Bimane IS	T1	Internal Standard	1002	2496	2.24	2.24	0.00		M+	1	1	1	N/A	111	111	.000 (mmu)	N/A	N/A	N/A	Method	True	False	N/A	N/A	N/A			Pass	Pass	N/A	N/A	N/A	Confirmed	N/A
82	Processed	190522-082		Unknown		1081									SCN-Bimane IS	T1C1	Internal Standard	556	1670	2.24	2.23	0.01		M+	N/A	N/A	N/A	N/A	126.1	126.1	-.002 (mmu)	N/A	N/A	N/A	Method	True	False	N/A	N/A	N/A			Pass	Pass	N/A	N/A	N/A	Confirmed	N/A
83	Processed	190522-083		Unknown		1082									SCN-Bimane	T1	Target Compound	348	867	2.23	2.24	0.01		M+	9.202	N/A	9.202	N/A	111	111	.000 (mmu)	0.414	1	2094	Method	True	False	N/A	N/A	N/A			Pass	Pass	N/A	N/A	N/A	Confirmed	N/A
83	Processed	190522-083		Unknown		1082									SCN-Bimane	T1C1	Target Compound	142	395	2.24	2.24	0.00		M+	N/A	N/A	N/A	N/A	124.1	124.1	-.002 (mmu)	0.414	N/A	N/A	Method	True	False	N/A	N/A	N/A			Pass	Pass	N/A	N/A	N/A	Confirmed	N/A
83	Processed	190522-083		Unknown		1082									SCN-Bimane IS	T1	Internal Standard	809	2094	2.24	2.24	0.00		M+	1	1	1	N/A	111	111	.000 (mmu)	N/A	N/A	N/A	Method	True	False	N/A	N/A	N/A			Pass	Fail	N/A	N/A	N/A	Identified	N/A
83	Processed	190522-083		Unknown		1082									SCN-Bimane IS	T1C1	Internal Standard	571	1753	2.24	2.24	0.00		M+	N/A	N/A	N/A	N/A	126.1	126.1	-.002 (mmu)	N/A	N/A	N/A	Method	True	False	N/A	N/A	N/A			Pass	Fail	N/A	N/A	N/A	Identified	N/A
84	Processed	190522-084		Unknown		1083									SCN-Bimane	T1	Target Compound	244	670	2.23	2.23	0.00		M+	6.398	N/A	6.398	N/A	111	111	.000 (mmu)	0.291	1	2305	Method	True	False	N/A	N/A	N/A			Pass	Pass	N/A	N/A	N/A	Confirmed	N/A
84	Processed	190522-084		Unknown		1083									SCN-Bimane	T1C1	Target Compound	133	373	2.23	2.23	0.00		M+	N/A	N/A	N/A	N/A	124.1	124.1	-.002 (mmu)	0.291	N/A	N/A	Method	True	False	N/A	N/A	N/A			Pass	Pass	N/A	N/A	N/A	Confirmed	N/A
84	Processed	190522-084		Unknown		1083									SCN-Bimane IS	T1	Internal Standard	920	2305	2.24	2.24	0.00		M+	1	1	1	N/A	111	111	.000 (mmu)	N/A	N/A	N/A	Method	True	False	N/A	N/A	N/A			Pass	Pass	N/A	N/A	N/A	Confirmed	N/A
84	Processed	190522-084		Unknown		1083									SCN-Bimane IS	T1C1	Internal Standard	432	1439	2.24	2.23	0.01		M+	N/A	N/A	N/A	N/A	126.1	126.1	-.002 (mmu)	N/A	N/A	N/A	Method	True	False	N/A	N/A	N/A			Pass	Pass	N/A	N/A	N/A	Confirmed	N/A
85	Processed	190522-085		Unknown		1084									SCN-Bimane	T1	Target Compound	42	45	2.23	2.24	0.01		M+	0.276	N/A	0.276	N/A	111	111	.000 (mmu)	0.021	1	2162	Method	True	False	N/A	N/A	N/A			Pass	Pass	N/A	N/A	N/A	Confirmed	N/A
85	Processed	190522-085		Unknown		1084									SCN-Bimane	T1C1	Target Compound	28	26	2.24	2.24	0.00		M+	N/A	N/A	N/A	N/A	124.1	124.1	-.002 (mmu)	0.021	N/A	N/A	Method	True	False	N/A	N/A	N/A			Pass	Pass	N/A	N/A	N/A	Confirmed	N/A
85	Processed	190522-085		Unknown		1084									SCN-Bimane IS	T1	Internal Standard	870	2162	2.24	2.23	-0.01		M+	1	1	1	N/A	111	111	.000 (mmu)	N/A	N/A	N/A	Method	True	False	N/A	N/A	N/A			Pass	Pass	N/A	N/A	N/A	Confirmed	N/A
85	Processed	190522-085		Unknown		1084									SCN-Bimane IS	T1C1	Internal Standard	460	1379	2.23	2.25	-0.02		M+	N/A	N/A	N/A	N/A	126.1	126.1	-.002 (mmu)	N/A	N/A	N/A	Method	True	False	N/A	N/A	N/A			Pass	Pass	N/A	N/A	N/A	Confirmed	N/A
86	Processed	190522-086		Unknown		1085									SCN-Bimane	T1	Target Compound	75	108	2.23	2.23	0.00		M+	1.04	N/A	1.04	N/A	111	111	.000 (mmu)	0.055	1	1969	Method	True	False	N/A	N/A	N/A			Pass	Pass	N/A	N/A	N/A	Confirmed	N/A
86	Processed	190522-086		Unknown		1085									SCN-Bimane	T1C1	Target Compound	62	60	2.23	2.23	0.00		M+	N/A	N/A	N/A	N/A	124.1	124.1	-.002 (mmu)	0.055	N/A	N/A	Method	True	False	N/A	N/A	N/A			Pass	Pass	N/A	N/A	N/A	Confirmed	N/A
86	Processed	190522-086		Unknown		1085									SCN-Bimane IS	T1	Internal Standard	927	1969	2.24	2.23	-0.01		M+	1	1	1	N/A	111	111	.000 (mmu)	N/A	N/A	N/A	Method	True	False	N/A	N/A	N/A			Pass	Fail	N/A	N/A	N/A	Identified	N/A
86	Processed	190522-086		Unknown		1085									SCN-Bimane IS	T1C1	Internal Standard	522	1801	2.23	2.23	0.00		M+	N/A	N/A	N/A	N/A	126.1	126.1	-.002 (mmu)	N/A	N/A	N/A	Method	True	False	N/A	N/A	N/A			Pass	Fail	N/A	N/A	N/A	Identified	N/A
87	Processed	190522-087		Unknown		1086									SCN-Bimane	T1	Target Compound	72	97	2.23	2.23	0.00		M+	1.106	N/A	1.106	N/A	111	111	.000 (mmu)	0.058	1	1679	Method	True	False	N/A	N/A	N/A			Pass	Fail	N/A	N/A	N/A	Identified	N/A
87	Processed	190522-087		Unknown		1086									SCN-Bimane	T1C1	Target Compound	47	71	2.23	2.23	0.00		M+	N/A	N/A	N/A	N/A	124.1	124.1	-.002 (mmu)	0.058	N/A	N/A	Method	True	False	N/A	N/A	N/A			Pass	Fail	N/A	N/A	N/A	Identified	N/A
87	Processed	190522-087		Unknown		1086									SCN-Bimane IS	T1	Internal Standard	706	1679	2.24	2.23	-0.01		M+	1	1	1	N/A	111	111	.000 (mmu)	N/A	N/A	N/A	Method	True	False	N/A	N/A	N/A			Pass	Fail	N/A	N/A	N/A	Identified	N/A
87	Processed	190522-087		Unknown		1086									SCN-Bimane IS	T1C1	Internal Standard	416	1451	2.23	2.23	0.01		M+	N/A	N/A	N/A	N/A	126.1	126.1	-.002 (mmu)	N/A	N/A	N/A	Method	True	False	N/A	N/A	N/A			Pass	Fail	N/A	N/A	N/A	Identified	N/A
88	Processed	190522-088		Unknown		1087									SCN-Bimane	T1	Target Compound	55	95	2.23	2.23	0.00		M+	0.871	N/A	0.871	N/A	111	111	.000 (mmu)	0.047	1	2016	Method	True	False	N/A	N/A	N/A			Pass	Fail	N/A	N/A	N/A	Identified	N/A
88	Processed	190522-088		Unknown		1087									SCN-Bimane	T1C1	Target Compound	22	25	2.23	2.23	-0.01		M+	N/A	N/A	N/A	N/A	124.1	124.1	-.002 (mmu)	0.047	N/A	N/A	Method	True	False	N/A	N/A	N/A			Pass	Fail	N/A	N/A	N/A	Identified	N/A
88	Processed	190522-088		Unknown		1087									SCN-Bimane IS	T1	Internal Standard	884	2016	2.24	2.23	-0.01		M+	1	1	1	N/A	111	111	.000 (mmu)	N/A	N/A	N/A	Method	True	False	N/A	N/A	N/A			Pass	Fail	N/A	N/A	N/A	Identified	N/A
88	Processed	190522-088		Unknown		1087									SCN-Bimane IS	T1C1	Internal Standard	452	1984	2.23	2.23	0.00		M+	N/A	N/A	N/A	N/A	126.1	126.1	-.002 (mmu)	N/A	N/A	N/A	Method	True	False	N/A	N/A	N/A			Pass	Fail	N/A	N/A	N/A	Identified	N/A
89	Processed	190522-089		Unknown		1088									SCN-Bimane	T1	Target Compound	977	2550	2.23	2.24	0.01		M+	20.327	N/A	20.327	N/A	111	111	.000 (mmu)	0.904	1	2819	Method	True	False	N/A	N/A	N/A			Pass	Pass	N/A	N/A	N/A	Confirmed	N/A
89	Processed	190522-089		Unknown		1088									SCN-Bimane	T1C1	Target Compound	446	1175	2.24	2.23	0.01		M+	N/A	N/A	N/A	N/A	124.1	124.1	-.002 (mmu)	0.904	N/A	N/A	Method	True	False	N/A	N/A	N/A			Pass	Pass	N/A	N/A	N/A	Confirmed	N/A
89	Processed	190522-089		Unknown		1088									SCN-Bimane IS	T1	Internal Standard	1194	2819	2.24	2.24	0.00		M+	1	1	1	N/A	111	111	.000 (mmu)	N/A	N/A	N/A	Method	True	False	N/A	N/A	N/A			Pass	Pass	N/A	N/A	N/A	Confirmed	N/A
89	Processed	190522-089		Unknown		1088									SCN-Bimane IS	T1C1	Internal Standard	619	1670	2.24	2.24	0.01		M+	N/A	N/A	N/A	N/A	126.1	126.1	-.002 (mmu)	N/A	N/A	N/A	Method	True	False	N/A	N/A	N/A			Pass	Pass	N/A	N/A	N/A	Confirmed	N/A
90	Processed	190522-090		Unknown		1089									SCN-Bimane	T1	Target Compound	1281	3127	2.23	2.24	0.01		M+	18.282	N/A	18.282	N/A	111	111	.000 (mmu)	0.814	1	3839	Method	True	False	N/A	N/A	N/A			Pass	Pass	N/A	N/A	N/A	Confirmed	N/A
90	Processed	190522-090		Unknown		1089									SCN-Bimane	T1C1	Target Compound	639	1637	2.24	2.23	0.00		M+	N/A	N/A	N/A	N/A	124.1	124.1	-.002 (mmu)	0.814	N/A	N/A	Method	True	False	N/A	N/A	N/A			Pass	Pass	N/A	N/A	N/A	Confirmed	N/A
90	Processed	190522-090		Unknown		1089									SCN-Bimane IS	T1	Internal Standard	1392	3839	2.24	2.24	0.00		M+	1	1	1	N/A	111	111	.000 (mmu)	N/A	N/A	N/A	Method	True	False	N/A	N/A	N/A			Pass	Pass	N/A	N/A	N/A	Confirmed	N/A
90	Processed	190522-090		Unknown		1089									SCN-Bimane IS	T1C1	Internal Standard	851	2537	2.24	2.24	0.00		M+	N/A	N/A	N/A	N/A	126.1	126.1	-.002 (mmu)	N/A	N/A	N/A	Method	True	False	N/A	N/A	N/A			Pass	Pass	N/A	N/A	N/A	Confirmed	N/A
91	Processed	190522-091		Unknown		1090									SCN-Bimane	T1	Target Compound	1948	5250	2.23	2.23	0.00		M+	44.808	N/A	44.808	N/A	111	111	.000 (mmu)	1.983	1	2647	Method	True	False	N/A	N/A	N/A			Pass	Pass	N/A	N/A	N/A	Confirmed	N/A
91	Processed	190522-091		Unknown		1090									SCN-Bimane	T1C1	Target Compound	968	2504	2.23	2.24	-0.01		M+	N/A	N/A	N/A	N/A	124.1	124.1	-.002 (mmu)	1.983	N/A	N/A	Method	True	False	N/A	N/A	N/A			Pass	Pass	N/A	N/A	N/A	Confirmed	N/A
91	Processed	190522-091		Unknown		1090									SCN-Bimane IS	T1	Internal Standard	1123	2647	2.24	2.24	0.00		M+	1	1	1	N/A	111	111	.000 (mmu)	N/A	N/A	N/A	Method	True	False	N/A	N/A	N/A			Pass	Pass	N/A	N/A	N/A	Confirmed	N/A
91	Processed	190522-091		Unknown		1090									SCN-Bimane IS	T1C1	Internal Standard	527	1652	2.24	2.25	-0.01		M+	N/A	N/A	N/A	N/A	126.1	126.1	-.002 (mmu)	N/A	N/A	N/A	Method	True	False	N/A	N/A	N/A			Pass	Pass	N/A	N/A	N/A	Confirmed	N/A
92	Processed	190522-092		Unknown		1091									SCN-Bimane	T1	Target Compound	1910	5018	2.23	2.23	0.00		M+	43.855	N/A	43.855	N/A	111	111	.000 (mmu)	1.941	1	2585	Method	True	False	N/A	N/A	N/A			Pass	Pass	N/A	N/A	N/A	Confirmed	N/A
92	Processed	190522-092		Unknown		1091									SCN-Bimane	T1C1	Target Compound	998	2396	2.23	2.23	0.00		M+	N/A	N/A	N/A	N/A	124.1	124.1	-.002 (mmu)	1.941	N/A	N/A	Method	True	False	N/A	N/A	N/A			Pass	Pass	N/A	N/A	N/A	Confirmed	N/A
92	Processed	190522-092		Unknown		1091									SCN-Bimane IS	T1	Internal Standard	961	2585	2.24	2.24	0.00		M+	1	1	1	N/A	111	111	.000 (mmu)	N/A	N/A	N/A	Method	True	False	N/A	N/A	N/A			Pass	Pass	N/A	N/A	N/A	Confirmed	N/A
92	Processed	190522-092		Unknown		1091									SCN-Bimane IS	T1C1	Internal Standard	530	1686	2.24	2.24	0.00		M+	N/A	N/A	N/A	N/A	126.1	126.1	-.002 (mmu)	N/A	N/A	N/A	Method	True	False	N/A	N/A	N/A			Pass	Pass	N/A	N/A	N/A	Confirmed	N/A
93	Processed	190522-093		Unknown		1092									SCN-Bimane	T1	Target Compound	65	66	2.23	2.24	0.01		M+	0.23	N/A	0.23	N/A	111	111	.000 (mmu)	0.019	1	3501	Method	True	False	N/A	N/A	N/A			Pass	Fail	N/A	N/A	N/A	Identified	N/A
93	Processed	190522-093		Unknown		1092									SCN-Bimane	T1C1	Target Compound	18	14	2.24	2.24	0.00		M+	N/A	N/A	N/A	N/A	124.1	124.1	-.002 (mmu)	0.019	N/A	N/A	Method	True	False	N/A	N/A	N/A			Pass	Fail	N/A	N/A	N/A	Identified	N/A
93	Processed	190522-093		Unknown		1092									SCN-Bimane IS	T1	Internal Standard	1490	3501	2.24	2.23	-0.01		M+	1	1	1	N/A	111	111	.000 (mmu)	N/A	N/A	N/A	Method	True	False	N/A	N/A	N/A			Pass	Pass	N/A	N/A	N/A	Confirmed	N/A
93	Processed	190522-093		Unknown		1092									SCN-Bimane IS	T1C1	Internal Standard	775	2375	2.23	2.23	0.00		M+	N/A	N/A	N/A	N/A	126.1	126.1	-.002 (mmu)	N/A	N/A	N/A	Method	True	False	N/A	N/A	N/A			Pass	Pass	N/A	N/A	N/A	Confirmed	N/A
94	Processed	190522-094		Unknown		1093									SCN-Bimane	T1	Target Compound	119	222	2.23	2.23	0.00		M+	1.002	N/A	1.002	N/A	111	111	.000 (mmu)	0.053	1	4182	Method	True	False	N/A	N/A	N/A			Pass	Fail	N/A	N/A	N/A	Identified	N/A
94	Processed	190522-094		Unknown		1093									SCN-Bimane	T1C1	Target Compound	90	224	2.23	2.24	-0.01		M+	N/A	N/A	N/A	N/A	124.1	124.1	-.002 (mmu)	0.053	N/A	N/A	Method	True	False	N/A	N/A	N/A			Pass	Fail	N/A	N/A	N/A	Identified	N/A
94	Processed	190522-094		Unknown		1093									SCN-Bimane IS	T1	Internal Standard	1650	4182	2.24	2.23	-0.01		M+	1	1	1	N/A	111	111	.000 (mmu)	N/A	N/A	N/A	Method	True	False	N/A	N/A	N/A			Pass	Pass	N/A	N/A	N/A	Confirmed	N/A
94	Processed	190522-094		Unknown		1093									SCN-Bimane IS	T1C1	Internal Standard	820	2609	2.23	2.24	-0.01		M+	N/A	N/A	N/A	N/A	126.1	126.1	-.002 (mmu)	N/A	N/A	N/A	Method	True	False	N/A	N/A	N/A			Pass	Pass	N/A	N/A	N/A	Confirmed	N/A
95	Processed	190522-095		Unknown		1094									SCN-Bimane	T1	Target Compound	6320	15504	2.23	2.23	0.00		M+	80.517	N/A	80.517	N/A	111	111	.000 (mmu)	3.557	1	4359	Method	True	False	N/A	N/A	N/A			Pass	Pass	N/A	N/A	N/A	Confirmed	N/A
95	Processed	190522-095		Unknown		1094									SCN-Bimane	T1C1	Target Compound	3013	7535	2.23	2.23	0.00		M+	N/A	N/A	N/A	N/A	124.1	124.1	-.002 (mmu)	3.557	N/A	N/A	Method	True	False	N/A	N/A	N/A			Pass	Pass	N/A	N/A	N/A	Confirmed	N/A
95	Processed	190522-095		Unknown		1094									SCN-Bimane IS	T1	Internal Standard	1868	4359	2.24	2.23	-0.01		M+	1	1	1	N/A	111	111	.000 (mmu)	N/A	N/A	N/A	Method	True	False	N/A	N/A	N/A			Pass	Pass	N/A	N/A	N/A	Confirmed	N/A
95	Processed	190522-095		Unknown		1094									SCN-Bimane IS	T1C1	Internal Standard	903	2806	2.23	2.23	0.00		M+	N/A	N/A	N/A	N/A	126.1	126.1	-.002 (mmu)	N/A	N/A	N/A	Method	True	False	N/A	N/A	N/A			Pass	Pass	N/A	N/A	N/A	Confirmed	N/A
96	Processed	190522-096		Unknown		1095									SCN-Bimane	T1	Target Compound	5983	13464	2.23	2.24	0.01		M+	66.725	N/A	66.725	N/A	111	111	.000 (mmu)	2.949	1	4566	Method	True	False	N/A	N/A	N/A			Pass	Pass	N/A	N/A	N/A	Confirmed	N/A
96	Processed	190522-096		Unknown		1095									SCN-Bimane	T1C1	Target Compound	2636	6270	2.24	2.24	0.00		M+	N/A	N/A	N/A	N/A	124.1	124.1	-.002 (mmu)	2.949	N/A	N/A	Method	True	False	N/A	N/A	N/A			Pass	Pass	N/A	N/A	N/A	Confirmed	N/A
96	Processed	190522-096		Unknown		1095									SCN-Bimane IS	T1	Internal Standard	2009	4566	2.24	2.24	0.00		M+	1	1	1	N/A	111	111	.000 (mmu)	N/A	N/A	N/A	Method	True	False	N/A	N/A	N/A			Pass	Pass	N/A	N/A	N/A	Confirmed	N/A
96	Processed	190522-096		Unknown		1095									SCN-Bimane IS	T1C1	Internal Standard	901	3192	2.24	2.23	0.01		M+	N/A	N/A	N/A	N/A	126.1	126.1	-.002 (mmu)	N/A	N/A	N/A	Method	True	False	N/A	N/A	N/A			Pass	Pass	N/A	N/A	N/A	Confirmed	N/A
97	Processed	190522-097		Unknown		1096									SCN-Bimane	T1	Target Compound	8	6	2.23	2.24	0.01		M+	-0.094	N/A	-0.094	N/A	111	111	.000 (mmu)	0.005	1	1378	Method	True	False	N/A	N/A	N/A			Pass	Fail	N/A	N/A	N/A	Identified	N/A
97	Processed	190522-097		Unknown		1096									SCN-Bimane	T1C1	Target Compound	11	4	2.24	2.26	-0.03		M+	N/A	N/A	N/A	N/A	124.1	124.1	-.002 (mmu)	0.005	N/A	N/A	Method	True	False	N/A	N/A	N/A			Pass	Fail	N/A	N/A	N/A	Identified	N/A
97	Processed	190522-097		Unknown		1096									SCN-Bimane IS	T1	Internal Standard	513	1378	2.24	2.25	0.01		M+	1	1	1	N/A	111	111	.000 (mmu)	N/A	N/A	N/A	Method	True	False	N/A	N/A	N/A			Pass	Pass	N/A	N/A	N/A	Confirmed	N/A
97	Processed	190522-097		Unknown		1096									SCN-Bimane IS	T1C1	Internal Standard	288	1029	2.25	2.24	0.01		M+	N/A	N/A	N/A	N/A	126.1	126.1	-.002 (mmu)	N/A	N/A	N/A	Method	True	False	N/A	N/A	N/A			Pass	Pass	N/A	N/A	N/A	Confirmed	N/A
98	Processed	190522-098		Unknown		1097									SCN-Bimane	T1	Target Compound	62	94	2.23	2.23	0.00		M+	1.115	N/A	1.115	N/A	111	111	.000 (mmu)	0.058	1	1622	Method	True	False	N/A	N/A	N/A			Pass	Fail	N/A	N/A	N/A	Identified	N/A
98	Processed	190522-098		Unknown		1097									SCN-Bimane	T1C1	Target Compound	31	33	2.23	2.23	-0.01		M+	N/A	N/A	N/A	N/A	124.1	124.1	-.002 (mmu)	0.058	N/A	N/A	Method	True	False	N/A	N/A	N/A			Pass	Fail	N/A	N/A	N/A	Identified	N/A
98	Processed	190522-098		Unknown		1097									SCN-Bimane IS	T1	Internal Standard	658	1622	2.24	2.24	0.00		M+	1	1	1	N/A	111	111	.000 (mmu)	N/A	N/A	N/A	Method	True	False	N/A	N/A	N/A			Pass	Fail	N/A	N/A	N/A	Identified	N/A
98	Processed	190522-098		Unknown		1097									SCN-Bimane IS	T1C1	Internal Standard	455	1327	2.24	2.23	0.01		M+	N/A	N/A	N/A	N/A	126.1	126.1	-.002 (mmu)	N/A	N/A	N/A	Method	True	False	N/A	N/A	N/A			Pass	Fail	N/A	N/A	N/A	Identified	N/A
99	Processed	190522-099		Unknown		1098									SCN-Bimane	T1	Target Compound	2461	6227	2.23	2.23	0.00		M+	79.535	N/A	79.535	N/A	111	111	.000 (mmu)	3.513	1	1772	Method	True	False	N/A	N/A	N/A			Pass	Pass	N/A	N/A	N/A	Confirmed	N/A
99	Processed	190522-099		Unknown		1098									SCN-Bimane	T1C1	Target Compound	1139	3146	2.23	2.23	0.00		M+	N/A	N/A	N/A	N/A	124.1	124.1	-.002 (mmu)	3.513	N/A	N/A	Method	True	False	N/A	N/A	N/A			Pass	Pass	N/A	N/A	N/A	Confirmed	N/A
99	Processed	190522-099		Unknown		1098									SCN-Bimane IS	T1	Internal Standard	740	1772	2.24	2.23	-0.01		M+	1	1	1	N/A	111	111	.000 (mmu)	N/A	N/A	N/A	Method	True	False	N/A	N/A	N/A			Pass	Pass	N/A	N/A	N/A	Confirmed	N/A
99	Processed	190522-099		Unknown		1098									SCN-Bimane IS	T1C1	Internal Standard	422	1207	2.23	2.24	0.00		M+	N/A	N/A	N/A	N/A	126.1	126.1	-.002 (mmu)	N/A	N/A	N/A	Method	True	False	N/A	N/A	N/A			Pass	Pass	N/A	N/A	N/A	Confirmed	N/A
100	Processed	190522-100		Unknown		1099									SCN-Bimane	T1	Target Compound	2296	5761	2.23	2.23	0.00		M+	70.877	N/A	70.877	N/A	111	111	.000 (mmu)	3.132	1	1839	Method	True	False	N/A	N/A	N/A			Pass	Pass	N/A	N/A	N/A	Confirmed	N/A
100	Processed	190522-100		Unknown		1099									SCN-Bimane	T1C1	Target Compound	1050	2537	2.23	2.23	0.00		M+	N/A	N/A	N/A	N/A	124.1	124.1	-.002 (mmu)	3.132	N/A	N/A	Method	True	False	N/A	N/A	N/A			Pass	Pass	N/A	N/A	N/A	Confirmed	N/A
100	Processed	190522-100		Unknown		1099									SCN-Bimane IS	T1	Internal Standard	741	1839	2.24	2.24	0.00		M+	1	1	1	N/A	111	111	.000 (mmu)	N/A	N/A	N/A	Method	True	False	N/A	N/A	N/A			Pass	Fail	N/A	N/A	N/A	Identified	N/A
100	Processed	190522-100		Unknown		1099									SCN-Bimane IS	T1C1	Internal Standard	433	1475	2.24	2.24	0.00		M+	N/A	N/A	N/A	N/A	126.1	126.1	-.002 (mmu)	N/A	N/A	N/A	Method	True	False	N/A	N/A	N/A			Pass	Fail	N/A	N/A	N/A	Identified	N/A
101	Processed	190522-101		Unknown		1100									SCN-Bimane	T1	Target Compound	50	66	2.23	2.23	0.00		M+	0.467	N/A	0.467	N/A	111	111	.000 (mmu)	0.029	1	2232	Method	True	False	N/A	N/A	N/A			Pass	Fail	N/A	N/A	N/A	Identified	N/A
101	Processed	190522-101		Unknown		1100									SCN-Bimane	T1C1	Target Compound	25	43	2.23	2.23	0.00		M+	N/A	N/A	N/A	N/A	124.1	124.1	-.002 (mmu)	0.029	N/A	N/A	Method	True	False	N/A	N/A	N/A			Pass	Fail	N/A	N/A	N/A	Identified	N/A
101	Processed	190522-101		Unknown		1100									SCN-Bimane IS	T1	Internal Standard	1003	2232	2.24	2.23	-0.01		M+	1	1	1	N/A	111	111	.000 (mmu)	N/A	N/A	N/A	Method	True	False	N/A	N/A	N/A			Pass	Pass	N/A	N/A	N/A	Confirmed	N/A
101	Processed	190522-101		Unknown		1100									SCN-Bimane IS	T1C1	Internal Standard	521	1682	2.23	2.24	0.00		M+	N/A	N/A	N/A	N/A	126.1	126.1	-.002 (mmu)	N/A	N/A	N/A	Method	True	False	N/A	N/A	N/A			Pass	Pass	N/A	N/A	N/A	Confirmed	N/A
102	Processed	190522-102		Unknown		1101									SCN-Bimane	T1	Target Compound	6	3	2.23	2.26	0.03		M+	-0.166	N/A	-0.166	N/A	111	111	.000 (mmu)	0.002	1	1674	Method	True	False	N/A	N/A	N/A			Pass	Fail	N/A	N/A	N/A	Identified	N/A
102	Processed	190522-102		Unknown		1101									SCN-Bimane	T1C1	Target Compound	21	18	2.26	2.25	0.01		M+	N/A	N/A	N/A	N/A	124.1	124.1	-.002 (mmu)	0.002	N/A	N/A	Method	True	False	N/A	N/A	N/A			Pass	Fail	N/A	N/A	N/A	Identified	N/A
102	Processed	190522-102		Unknown		1101									SCN-Bimane IS	T1	Internal Standard	685	1674	2.24	2.24	0.00		M+	1	1	1	N/A	111	111	.000 (mmu)	N/A	N/A	N/A	Method	True	False	N/A	N/A	N/A			Pass	Pass	N/A	N/A	N/A	Confirmed	N/A
102	Processed	190522-102		Unknown		1101									SCN-Bimane IS	T1C1	Internal Standard	357	1158	2.24	2.23	0.01		M+	N/A	N/A	N/A	N/A	126.1	126.1	-.002 (mmu)	N/A	N/A	N/A	Method	True	False	N/A	N/A	N/A			Pass	Pass	N/A	N/A	N/A	Confirmed	N/A
103	Processed	190522-103		Unknown		1102									SCN-Bimane	T1	Target Compound	3840	9069	2.23	2.23	0.00		M+	74.117	N/A	74.117	N/A	111	111	.000 (mmu)	3.275	1	2769	Method	True	False	N/A	N/A	N/A			Pass	Pass	N/A	N/A	N/A	Confirmed	N/A
103	Processed	190522-103		Unknown		1102									SCN-Bimane	T1C1	Target Compound	1704	4114	2.23	2.23	0.00		M+	N/A	N/A	N/A	N/A	124.1	124.1	-.002 (mmu)	3.275	N/A	N/A	Method	True	False	N/A	N/A	N/A			Pass	Pass	N/A	N/A	N/A	Confirmed	N/A
103	Processed	190522-103		Unknown		1102									SCN-Bimane IS	T1	Internal Standard	1038	2769	2.24	2.23	-0.01		M+	1	1	1	N/A	111	111	.000 (mmu)	N/A	N/A	N/A	Method	True	False	N/A	N/A	N/A			Pass	Fail	N/A	N/A	N/A	Identified	N/A
103	Processed	190522-103		Unknown		1102									SCN-Bimane IS	T1C1	Internal Standard	699	2342	2.23	2.23	0.00		M+	N/A	N/A	N/A	N/A	126.1	126.1	-.002 (mmu)	N/A	N/A	N/A	Method	True	False	N/A	N/A	N/A			Pass	Fail	N/A	N/A	N/A	Identified	N/A
104	Processed	190522-104		Unknown		1103									SCN-Bimane	T1	Target Compound	3047	8032	2.23	2.24	0.01		M+	58.236	N/A	58.236	N/A	111	111	.000 (mmu)	2.575	1	3119	Method	True	False	N/A	N/A	N/A			Pass	Pass	N/A	N/A	N/A	Confirmed	N/A
104	Processed	190522-104		Unknown		1103									SCN-Bimane	T1C1	Target Compound	1684	3931	2.24	2.23	0.00		M+	N/A	N/A	N/A	N/A	124.1	124.1	-.002 (mmu)	2.575	N/A	N/A	Method	True	False	N/A	N/A	N/A			Pass	Pass	N/A	N/A	N/A	Confirmed	N/A
104	Processed	190522-104		Unknown		1103									SCN-Bimane IS	T1	Internal Standard	1278	3119	2.24	2.24	0.00		M+	1	1	1	N/A	111	111	.000 (mmu)	N/A	N/A	N/A	Method	True	False	N/A	N/A	N/A			Pass	Pass	N/A	N/A	N/A	Confirmed	N/A
104	Processed	190522-104		Unknown		1103									SCN-Bimane IS	T1C1	Internal Standard	696	1992	2.24	2.23	0.01		M+	N/A	N/A	N/A	N/A	126.1	126.1	-.002 (mmu)	N/A	N/A	N/A	Method	True	False	N/A	N/A	N/A			Pass	Pass	N/A	N/A	N/A	Confirmed	N/A
105	Processed	190522-105		Unknown		1104									SCN-Bimane	T1	Target Compound	79	138	2.23	2.22	-0.01		M+	0.929	N/A	0.929	N/A	111	111	.000 (mmu)	0.05	1	2782	Method	True	False	N/A	N/A	N/A			Pass	Fail	N/A	N/A	N/A	Identified	N/A
105	Processed	190522-105		Unknown		1104									SCN-Bimane	T1C1	Target Compound	63	125	2.22	2.22	0.00		M+	N/A	N/A	N/A	N/A	124.1	124.1	-.002 (mmu)	0.05	N/A	N/A	Method	True	False	N/A	N/A	N/A			Pass	Fail	N/A	N/A	N/A	Identified	N/A
105	Processed	190522-105		Unknown		1104									SCN-Bimane IS	T1	Internal Standard	1094	2782	2.24	2.24	0.00		M+	1	1	1	N/A	111	111	.000 (mmu)	N/A	N/A	N/A	Method	True	False	N/A	N/A	N/A			Pass	Pass	N/A	N/A	N/A	Confirmed	N/A
105	Processed	190522-105		Unknown		1104									SCN-Bimane IS	T1C1	Internal Standard	602	2059	2.24	2.23	0.01		M+	N/A	N/A	N/A	N/A	126.1	126.1	-.002 (mmu)	N/A	N/A	N/A	Method	True	False	N/A	N/A	N/A			Pass	Pass	N/A	N/A	N/A	Confirmed	N/A
106	Processed	190522-106		Unknown		1105									SCN-Bimane	T1	Target Compound	31	67	2.23	2.22	-0.01		M+	0.676	N/A	0.676	N/A	111	111	.000 (mmu)	0.039	1	1742	Method	True	False	N/A	N/A	N/A			Pass	Pass	N/A	N/A	N/A	Confirmed	N/A
106	Processed	190522-106		Unknown		1105									SCN-Bimane	T1C1	Target Compound	38	36	2.22	2.23	0.00		M+	N/A	N/A	N/A	N/A	124.1	124.1	-.002 (mmu)	0.039	N/A	N/A	Method	True	False	N/A	N/A	N/A			Pass	Pass	N/A	N/A	N/A	Confirmed	N/A
106	Processed	190522-106		Unknown		1105									SCN-Bimane IS	T1	Internal Standard	680	1742	2.24	2.23	-0.01		M+	1	1	1	N/A	111	111	.000 (mmu)	N/A	N/A	N/A	Method	True	False	N/A	N/A	N/A			Pass	Pass	N/A	N/A	N/A	Confirmed	N/A
106	Processed	190522-106		Unknown		1105									SCN-Bimane IS	T1C1	Internal Standard	381	1204	2.23	2.22	0.01		M+	N/A	N/A	N/A	N/A	126.1	126.1	-.002 (mmu)	N/A	N/A	N/A	Method	True	False	N/A	N/A	N/A			Pass	Pass	N/A	N/A	N/A	Confirmed	N/A
107	Processed	190522-107		Unknown		1106									SCN-Bimane	T1	Target Compound	N/F	N/F	2.23	N/F	N/F		N/A	N/F	N/A	N/F	N/A	111	N/F	N/F	N/F	1	1670	Method	True	False	N/A	N/A	N/A			Fail	N/A	N/A	N/A	N/A	NotFound	N/A
107	Processed	190522-107		Unknown		1106									SCN-Bimane	T1C1	Target Compound	N/F	N/F	0	N/A	N/A		M+	N/A	N/A	N/A	N/A	124.1	N/F	N/A	N/F	N/A	N/A	Method	True	False	N/A	N/A	N/A			Fail	N/A	N/A	N/A	N/A	NotFound	N/A
107	Processed	190522-107		Unknown		1106									SCN-Bimane IS	T1	Internal Standard	701	1670	2.24	2.23	-0.01		M+	1	1	1	N/A	111	111	.000 (mmu)	N/A	N/A	N/A	Method	True	False	N/A	N/A	N/A			Pass	Fail	N/A	N/A	N/A	Identified	N/A
107	Processed	190522-107		Unknown		1106									SCN-Bimane IS	T1C1	Internal Standard	357	1404	2.23	2.23	0.01		M+	N/A	N/A	N/A	N/A	126.1	126.1	-.002 (mmu)	N/A	N/A	N/A	Method	True	False	N/A	N/A	N/A			Pass	Fail	N/A	N/A	N/A	Identified	N/A
108	Processed	190522-108		Unknown		1107									SCN-Bimane	T1	Target Compound	9	4	2.23	2.25	0.02		M+	-0.158	N/A	-0.158	N/A	111	111	.000 (mmu)	0.002	1	1996	Method	True	False	N/A	N/A	N/A			Pass	Fail	N/A	N/A	N/A	Identified	N/A
108	Processed	190522-108		Unknown		1107									SCN-Bimane	T1C1	Target Compound	13	10	2.25	2.25	0.00		M+	N/A	N/A	N/A	N/A	124.1	124.1	-.002 (mmu)	0.002	N/A	N/A	Method	True	False	N/A	N/A	N/A			Pass	Fail	N/A	N/A	N/A	Identified	N/A
108	Processed	190522-108		Unknown		1107									SCN-Bimane IS	T1	Internal Standard	779	1996	2.24	2.23	-0.01		M+	1	1	1	N/A	111	111	.000 (mmu)	N/A	N/A	N/A	Method	True	False	N/A	N/A	N/A			Pass	Pass	N/A	N/A	N/A	Confirmed	N/A
108	Processed	190522-108		Unknown		1107									SCN-Bimane IS	T1C1	Internal Standard	393	1317	2.23	2.23	0.00		M+	N/A	N/A	N/A	N/A	126.1	126.1	-.002 (mmu)	N/A	N/A	N/A	Method	True	False	N/A	N/A	N/A			Pass	Pass	N/A	N/A	N/A	Confirmed	N/A
109	Processed	190522-109		Unknown		1108									SCN-Bimane	T1	Target Compound	2	1	2.23	2.22	-0.01		M+	-0.195	N/A	-0.195	N/A	111	111	.000 (mmu)	0	1	2533	Method	True	False	N/A	N/A	N/A			Pass	Fail	N/A	N/A	N/A	Identified	N/A
109	Processed	190522-109		Unknown		1108									SCN-Bimane	T1C1	Target Compound	36	21	2.22	2.21	0.01		M+	N/A	N/A	N/A	N/A	124.1	124.1	-.002 (mmu)	0	N/A	N/A	Method	True	False	N/A	N/A	N/A			Pass	Fail	N/A	N/A	N/A	Identified	N/A
109	Processed	190522-109		Unknown		1108									SCN-Bimane IS	T1	Internal Standard	1108	2533	2.24	2.24	0.00		M+	1	1	1	N/A	111	111	.000 (mmu)	N/A	N/A	N/A	Method	True	False	N/A	N/A	N/A			Pass	Fail	N/A	N/A	N/A	Identified	N/A
109	Processed	190522-109		Unknown		1108									SCN-Bimane IS	T1C1	Internal Standard	606	2418	2.24	2.23	0.00		M+	N/A	N/A	N/A	N/A	126.1	126.1	-.002 (mmu)	N/A	N/A	N/A	Method	True	False	N/A	N/A	N/A			Pass	Fail	N/A	N/A	N/A	Identified	N/A
110	Processed	190522-110		Unknown		1109									SCN-Bimane	T1	Target Compound	2	1	2.23	2.25	0.02		M+	-0.188	N/A	-0.188	N/A	111	111	.000 (mmu)	0.001	1	1655	Method	True	False	N/A	N/A	N/A			Pass	Fail	N/A	N/A	N/A	Identified	N/A
110	Processed	190522-110		Unknown		1109									SCN-Bimane	T1C1	Target Compound	17	12	2.25	2.25	0.00		M+	N/A	N/A	N/A	N/A	124.1	124.1	-.002 (mmu)	0.001	N/A	N/A	Method	True	False	N/A	N/A	N/A			Pass	Fail	N/A	N/A	N/A	Identified	N/A
110	Processed	190522-110		Unknown		1109									SCN-Bimane IS	T1	Internal Standard	638	1655	2.24	2.24	0.00		M+	1	1	1	N/A	111	111	.000 (mmu)	N/A	N/A	N/A	Method	True	False	N/A	N/A	N/A			Pass	Fail	N/A	N/A	N/A	Identified	N/A
110	Processed	190522-110		Unknown		1109									SCN-Bimane IS	T1C1	Internal Standard	419	1453	2.24	2.24	0.00		M+	N/A	N/A	N/A	N/A	126.1	126.1	-.002 (mmu)	N/A	N/A	N/A	Method	True	False	N/A	N/A	N/A			Pass	Fail	N/A	N/A	N/A	Identified	N/A
111	Processed	190522-111		Unknown		1110									SCN-Bimane	T1	Target Compound	20	10	2.23	2.24	0.01		M+	-0.08	N/A	-0.08	N/A	111	111	.000 (mmu)	0.005	1	1913	Method	True	False	N/A	N/A	N/A			Pass	Fail	N/A	N/A	N/A	Identified	N/A
111	Processed	190522-111		Unknown		1110									SCN-Bimane	T1C1	Target Compound	17	10	2.24	2.24	0.00		M+	N/A	N/A	N/A	N/A	124.1	124.1	-.002 (mmu)	0.005	N/A	N/A	Method	True	False	N/A	N/A	N/A			Pass	Fail	N/A	N/A	N/A	Identified	N/A
111	Processed	190522-111		Unknown		1110									SCN-Bimane IS	T1	Internal Standard	780	1913	2.24	2.24	0.00		M+	1	1	1	N/A	111	111	.000 (mmu)	N/A	N/A	N/A	Method	True	False	N/A	N/A	N/A			Pass	Fail	N/A	N/A	N/A	Identified	N/A
111	Processed	190522-111		Unknown		1110									SCN-Bimane IS	T1C1	Internal Standard	439	1007	2.24	2.24	0.00		M+	N/A	N/A	N/A	N/A	126.1	126.1	-.002 (mmu)	N/A	N/A	N/A	Method	True	False	N/A	N/A	N/A			Pass	Fail	N/A	N/A	N/A	Identified	N/A
112	Processed	190522-112		Unknown		1111									SCN-Bimane	T1	Target Compound	37	25	2.23	2.24	0.01		M+	0.399	N/A	0.399	N/A	111	111	.000 (mmu)	0.026	1	943	Method	True	False	N/A	N/A	N/A			Pass	Fail	N/A	N/A	N/A	Identified	N/A
112	Processed	190522-112		Unknown		1111									SCN-Bimane	T1C1	Target Compound	18	17	2.24	2.28	-0.04		M+	N/A	N/A	N/A	N/A	124.1	124.1	-.002 (mmu)	0.026	N/A	N/A	Method	True	False	N/A	N/A	N/A			Pass	Fail	N/A	N/A	N/A	Identified	N/A
112	Processed	190522-112		Unknown		1111									SCN-Bimane IS	T1	Internal Standard	415	943	2.24	2.24	0.00		M+	1	1	1	N/A	111	111	.000 (mmu)	N/A	N/A	N/A	Method	True	False	N/A	N/A	N/A			Pass	Fail	N/A	N/A	N/A	Identified	N/A
112	Processed	190522-112		Unknown		1111									SCN-Bimane IS	T1C1	Internal Standard	392	1060	2.24	2.24	0.00		M+	N/A	N/A	N/A	N/A	126.1	126.1	-.002 (mmu)	N/A	N/A	N/A	Method	True	False	N/A	N/A	N/A			Pass	Fail	N/A	N/A	N/A	Identified	N/A
113	Processed	190522-113		Unknown		1112									SCN-Bimane	T1	Target Compound	0	0	2.23	2.21	-0.02		M+	-0.199	N/A	-0.199	N/A	111	111	.000 (mmu)	0	1	765	Method	True	False	N/A	N/A	N/A			Pass	Fail	N/A	N/A	N/A	Identified	N/A
113	Processed	190522-113		Unknown		1112									SCN-Bimane	T1C1	Target Compound	N/F	N/F	2.21	N/A	N/A		M+	N/A	N/A	N/A	N/A	124.1	N/F	N/A	0	N/A	N/A	Method	True	False	N/A	N/A	N/A			Fail	Fail	N/A	N/A	N/A	NotFound	N/A
113	Processed	190522-113		Unknown		1112									SCN-Bimane IS	T1	Internal Standard	319	765	2.24	2.23	-0.01		M+	1	1	1	N/A	111	111	.000 (mmu)	N/A	N/A	N/A	Method	True	False	N/A	N/A	N/A			Pass	Pass	N/A	N/A	N/A	Confirmed	N/A
113	Processed	190522-113		Unknown		1112									SCN-Bimane IS	T1C1	Internal Standard	204	568	2.23	2.24	-0.01		M+	N/A	N/A	N/A	N/A	126.1	126.1	-.002 (mmu)	N/A	N/A	N/A	Method	True	False	N/A	N/A	N/A			Pass	Pass	N/A	N/A	N/A	Confirmed	N/A
114	Processed	190522-114		Unknown		1113									SCN-Bimane	T1	Target Compound	12	9	2.23	2.17	-0.06		M+	-0.021	N/A	-0.021	N/A	111	111	.000 (mmu)	0.008	1	1163	Method	True	False	N/A	N/A	N/A			Pass	Fail	N/A	N/A	N/A	Identified	N/A
114	Processed	190522-114		Unknown		1113									SCN-Bimane	T1C1	Target Compound	4	2	2.17	2.24	-0.06		M+	N/A	N/A	N/A	N/A	124.1	124.1	-.002 (mmu)	0.008	N/A	N/A	Method	True	False	N/A	N/A	N/A			Pass	Fail	N/A	N/A	N/A	Identified	N/A
114	Processed	190522-114		Unknown		1113									SCN-Bimane IS	T1	Internal Standard	712	1163	2.24	2.23	-0.01		M+	1	1	1	N/A	111	111	.000 (mmu)	N/A	N/A	N/A	Method	True	False	N/A	N/A	N/A			Pass	Fail	N/A	N/A	N/A	Identified	N/A
114	Processed	190522-114		Unknown		1113									SCN-Bimane IS	T1C1	Internal Standard	342	1013	2.23	2.23	0.00		M+	N/A	N/A	N/A	N/A	126.1	126.1	-.002 (mmu)	N/A	N/A	N/A	Method	True	False	N/A	N/A	N/A			Pass	Fail	N/A	N/A	N/A	Identified	N/A
115	Processed	190522-115		Unknown		1114									SCN-Bimane	T1	Target Compound	N/F	N/F	2.23	N/F	N/F		N/A	N/F	N/A	N/F	N/A	111	N/F	N/F	N/F	1	1118	Method	True	False	N/A	N/A	N/A			Fail	N/A	N/A	N/A	N/A	NotFound	N/A
115	Processed	190522-115		Unknown		1114									SCN-Bimane	T1C1	Target Compound	N/F	N/F	0	N/A	N/A		M+	N/A	N/A	N/A	N/A	124.1	N/F	N/A	N/F	N/A	N/A	Method	True	False	N/A	N/A	N/A			Fail	N/A	N/A	N/A	N/A	NotFound	N/A
115	Processed	190522-115		Unknown		1114									SCN-Bimane IS	T1	Internal Standard	479	1118	2.24	2.23	-0.01		M+	1	1	1	N/A	111	111	.000 (mmu)	N/A	N/A	N/A	Method	True	False	N/A	N/A	N/A			Pass	Fail	N/A	N/A	N/A	Identified	N/A
115	Processed	190522-115		Unknown		1114									SCN-Bimane IS	T1C1	Internal Standard	382	1206	2.23	2.23	0.00		M+	N/A	N/A	N/A	N/A	126.1	126.1	-.002 (mmu)	N/A	N/A	N/A	Method	True	False	N/A	N/A	N/A			Pass	Fail	N/A	N/A	N/A	Identified	N/A
116	Processed	190522-116		Unknown		1115									SCN-Bimane	T1	Target Compound	11	6	2.23	2.24	0.01		M+	-0.027	N/A	-0.027	N/A	111	111	.000 (mmu)	0.008	1	829	Method	True	False	N/A	N/A	N/A			Pass	Fail	N/A	N/A	N/A	Identified	N/A
116	Processed	190522-116		Unknown		1115									SCN-Bimane	T1C1	Target Compound	N/F	N/F	2.24	N/A	N/A		M+	N/A	N/A	N/A	N/A	124.1	N/F	N/A	0.008	N/A	N/A	Method	True	False	N/A	N/A	N/A			Fail	Fail	N/A	N/A	N/A	NotFound	N/A
116	Processed	190522-116		Unknown		1115									SCN-Bimane IS	T1	Internal Standard	315	829	2.24	2.24	0.00		M+	1	1	1	N/A	111	111	.000 (mmu)	N/A	N/A	N/A	Method	True	False	N/A	N/A	N/A			Pass	Fail	N/A	N/A	N/A	Identified	N/A
116	Processed	190522-116		Unknown		1115									SCN-Bimane IS	T1C1	Internal Standard	231	723	2.24	2.24	0.00		M+	N/A	N/A	N/A	N/A	126.1	126.1	-.002 (mmu)	N/A	N/A	N/A	Method	True	False	N/A	N/A	N/A			Pass	Fail	N/A	N/A	N/A	Identified	N/A
117	Processed	190522-117		Unknown		1116									SCN-Bimane	T1	Target Compound	7	3	2.23	2.24	0.01		M+	-0.157	N/A	-0.157	N/A	111	111	.000 (mmu)	0.002	1	1427	Method	True	False	N/A	N/A	N/A			Pass	Fail	N/A	N/A	N/A	Identified	N/A
117	Processed	190522-117		Unknown		1116									SCN-Bimane	T1C1	Target Compound	63	85	2.24	2.23	0.01		M+	N/A	N/A	N/A	N/A	124.1	124.1	-.002 (mmu)	0.002	N/A	N/A	Method	True	False	N/A	N/A	N/A			Pass	Fail	N/A	N/A	N/A	Identified	N/A
117	Processed	190522-117		Unknown		1116									SCN-Bimane IS	T1	Internal Standard	636	1427	2.24	2.24	0.00		M+	1	1	1	N/A	111	111	.000 (mmu)	N/A	N/A	N/A	Method	True	False	N/A	N/A	N/A			Pass	Fail	N/A	N/A	N/A	Identified	N/A
117	Processed	190522-117		Unknown		1116									SCN-Bimane IS	T1C1	Internal Standard	424	1499	2.24	2.24	0.00		M+	N/A	N/A	N/A	N/A	126.1	126.1	-.002 (mmu)	N/A	N/A	N/A	Method	True	False	N/A	N/A	N/A			Pass	Fail	N/A	N/A	N/A	Identified	N/A
118	Processed	190522-118		Unknown		1117									SCN-Bimane	T1	Target Compound	0	0	2.23	2.22	-0.01		M+	-0.2	N/A	-0.2	N/A	111	111	.000 (mmu)	0	1	1411	Method	True	False	N/A	N/A	N/A			Pass	Fail	N/A	N/A	N/A	Identified	N/A
118	Processed	190522-118		Unknown		1117									SCN-Bimane	T1C1	Target Compound	18	13	2.22	2.23	-0.02		M+	N/A	N/A	N/A	N/A	124.1	124.1	-.002 (mmu)	0	N/A	N/A	Method	True	False	N/A	N/A	N/A			Pass	Fail	N/A	N/A	N/A	Identified	N/A
118	Processed	190522-118		Unknown		1117									SCN-Bimane IS	T1	Internal Standard	645	1411	2.24	2.24	0.00		M+	1	1	1	N/A	111	111	.000 (mmu)	N/A	N/A	N/A	Method	True	False	N/A	N/A	N/A			Pass	Fail	N/A	N/A	N/A	Identified	N/A
118	Processed	190522-118		Unknown		1117									SCN-Bimane IS	T1C1	Internal Standard	381	1326	2.24	2.24	0.00		M+	N/A	N/A	N/A	N/A	126.1	126.1	-.002 (mmu)	N/A	N/A	N/A	Method	True	False	N/A	N/A	N/A			Pass	Fail	N/A	N/A	N/A	Identified	N/A
119	Processed	190522-119		Unknown		1118									SCN-Bimane	T1	Target Compound	11	5	2.23	2.29	0.06		M+	-0.067	N/A	-0.067	N/A	111	111	.000 (mmu)	0.006	1	769	Method	True	False	N/A	N/A	N/A			Pass	Fail	N/A	N/A	N/A	Identified	N/A
119	Processed	190522-119		Unknown		1118									SCN-Bimane	T1C1	Target Compound	2	1	2.29	2.19	0.10		M+	N/A	N/A	N/A	N/A	124.1	124.1	-.002 (mmu)	0.006	N/A	N/A	Method	True	False	N/A	N/A	N/A			Pass	Fail	N/A	N/A	N/A	Identified	N/A
119	Processed	190522-119		Unknown		1118									SCN-Bimane IS	T1	Internal Standard	280	769	2.24	2.24	0.00		M+	1	1	1	N/A	111	111	.000 (mmu)	N/A	N/A	N/A	Method	True	False	N/A	N/A	N/A			Pass	Pass	N/A	N/A	N/A	Confirmed	N/A
119	Processed	190522-119		Unknown		1118									SCN-Bimane IS	T1C1	Internal Standard	240	582	2.24	2.25	0.00		M+	N/A	N/A	N/A	N/A	126.1	126.1	-.002 (mmu)	N/A	N/A	N/A	Method	True	False	N/A	N/A	N/A			Pass	Pass	N/A	N/A	N/A	Confirmed	N/A
120	Processed	190522-120		Unknown		1119									SCN-Bimane	T1	Target Compound	1	0	2.23	2.25	0.02		M+	-0.194	N/A	-0.194	N/A	111	111	.000 (mmu)	0	1	1603	Method	True	False	N/A	N/A	N/A			Pass	Fail	N/A	N/A	N/A	Identified	N/A
120	Processed	190522-120		Unknown		1119									SCN-Bimane	T1C1	Target Compound	21	22	2.25	2.24	0.01		M+	N/A	N/A	N/A	N/A	124.1	124.1	-.002 (mmu)	0	N/A	N/A	Method	True	False	N/A	N/A	N/A			Pass	Fail	N/A	N/A	N/A	Identified	N/A
120	Processed	190522-120		Unknown		1119									SCN-Bimane IS	T1	Internal Standard	636	1603	2.24	2.23	-0.01		M+	1	1	1	N/A	111	111	.000 (mmu)	N/A	N/A	N/A	Method	True	False	N/A	N/A	N/A			Pass	Fail	N/A	N/A	N/A	Identified	N/A
120	Processed	190522-120		Unknown		1119									SCN-Bimane IS	T1C1	Internal Standard	412	1665	2.23	2.24	0.00		M+	N/A	N/A	N/A	N/A	126.1	126.1	-.002 (mmu)	N/A	N/A	N/A	Method	True	False	N/A	N/A	N/A			Pass	Fail	N/A	N/A	N/A	Identified	N/A
121	Processed	190522-121		Unknown		1120									SCN-Bimane	T1	Target Compound	1	0	2.23	2.31	0.08		M+	-0.187	N/A	-0.187	N/A	111	111	.000 (mmu)	0.001	1	765	Method	True	False	N/A	N/A	N/A			Pass	Fail	N/A	N/A	N/A	Identified	N/A
121	Processed	190522-121		Unknown		1120									SCN-Bimane	T1C1	Target Compound	7	3	2.31	2.28	0.03		M+	N/A	N/A	N/A	N/A	124.1	124.1	-.002 (mmu)	0.001	N/A	N/A	Method	True	False	N/A	N/A	N/A			Pass	Fail	N/A	N/A	N/A	Identified	N/A
121	Processed	190522-121		Unknown		1120									SCN-Bimane IS	T1	Internal Standard	336	765	2.24	2.23	-0.01		M+	1	1	1	N/A	111	111	.000 (mmu)	N/A	N/A	N/A	Method	True	False	N/A	N/A	N/A			Pass	Pass	N/A	N/A	N/A	Confirmed	N/A
121	Processed	190522-121		Unknown		1120									SCN-Bimane IS	T1C1	Internal Standard	215	479	2.23	2.23	0.01		M+	N/A	N/A	N/A	N/A	126.1	126.1	-.002 (mmu)	N/A	N/A	N/A	Method	True	False	N/A	N/A	N/A			Pass	Pass	N/A	N/A	N/A	Confirmed	N/A
122	Processed	190522-122		Unknown		1121									SCN-Bimane	T1	Target Compound	33	23	2.23	2.25	0.02		M+	0.455	N/A	0.455	N/A	111	111	.000 (mmu)	0.029	1	812	Method	True	False	N/A	N/A	N/A			Pass	Fail	N/A	N/A	N/A	Identified	N/A
122	Processed	190522-122		Unknown		1121									SCN-Bimane	T1C1	Target Compound	0	0	2.25	2.26	-0.01		M+	N/A	N/A	N/A	N/A	124.1	124.1	-.002 (mmu)	0.029	N/A	N/A	Method	True	False	N/A	N/A	N/A			Pass	Fail	N/A	N/A	N/A	Identified	N/A
122	Processed	190522-122		Unknown		1121									SCN-Bimane IS	T1	Internal Standard	365	812	2.24	2.24	0.00		M+	1	1	1	N/A	111	111	.000 (mmu)	N/A	N/A	N/A	Method	True	False	N/A	N/A	N/A			Pass	Fail	N/A	N/A	N/A	Identified	N/A
122	Processed	190522-122		Unknown		1121									SCN-Bimane IS	T1C1	Internal Standard	208	698	2.24	2.22	0.02		M+	N/A	N/A	N/A	N/A	126.1	126.1	-.002 (mmu)	N/A	N/A	N/A	Method	True	False	N/A	N/A	N/A			Pass	Fail	N/A	N/A	N/A	Identified	N/A
123	Processed	190522-123		Unknown		1122									SCN-Bimane	T1	Target Compound	0	0	2.23	2.22	-0.01		M+	-0.2	N/A	-0.2	N/A	111	111	.000 (mmu)	0	1	1029	Method	True	False	N/A	N/A	N/A			Pass	Fail	N/A	N/A	N/A	Identified	N/A
123	Processed	190522-123		Unknown		1122									SCN-Bimane	T1C1	Target Compound	27	19	2.22	2.2	0.02		M+	N/A	N/A	N/A	N/A	124.1	124.1	-.002 (mmu)	0	N/A	N/A	Method	True	False	N/A	N/A	N/A			Pass	Fail	N/A	N/A	N/A	Identified	N/A
123	Processed	190522-123		Unknown		1122									SCN-Bimane IS	T1	Internal Standard	473	1029	2.24	2.23	-0.01		M+	1	1	1	N/A	111	111	.000 (mmu)	N/A	N/A	N/A	Method	True	False	N/A	N/A	N/A			Pass	Fail	N/A	N/A	N/A	Identified	N/A
123	Processed	190522-123		Unknown		1122									SCN-Bimane IS	T1C1	Internal Standard	285	853	2.23	2.23	0.00		M+	N/A	N/A	N/A	N/A	126.1	126.1	-.002 (mmu)	N/A	N/A	N/A	Method	True	False	N/A	N/A	N/A			Pass	Fail	N/A	N/A	N/A	Identified	N/A
124	Processed	190522-124		Unknown		1123									SCN-Bimane	T1	Target Compound	N/F	N/F	2.23	N/F	N/F		N/A	N/F	N/A	N/F	N/A	111	N/F	N/F	N/F	1	911	Method	True	False	N/A	N/A	N/A			Fail	N/A	N/A	N/A	N/A	NotFound	N/A
124	Processed	190522-124		Unknown		1123									SCN-Bimane	T1C1	Target Compound	N/F	N/F	0	N/A	N/A		M+	N/A	N/A	N/A	N/A	124.1	N/F	N/A	N/F	N/A	N/A	Method	True	False	N/A	N/A	N/A			Fail	N/A	N/A	N/A	N/A	NotFound	N/A
124	Processed	190522-124		Unknown		1123									SCN-Bimane IS	T1	Internal Standard	345	911	2.24	2.23	-0.01		M+	1	1	1	N/A	111	111	.000 (mmu)	N/A	N/A	N/A	Method	True	False	N/A	N/A	N/A			Pass	Fail	N/A	N/A	N/A	Identified	N/A
124	Processed	190522-124		Unknown		1123									SCN-Bimane IS	T1C1	Internal Standard	246	839	2.23	2.23	-0.01		M+	N/A	N/A	N/A	N/A	126.1	126.1	-.002 (mmu)	N/A	N/A	N/A	Method	True	False	N/A	N/A	N/A			Pass	Fail	N/A	N/A	N/A	Identified	N/A
125	Processed	190522-125		Unknown		1124									SCN-Bimane	T1	Target Compound	73	52	2.23	2.23	0.00		M+	0.713	N/A	0.713	N/A	111	111	.000 (mmu)	0.04	1	1303	Method	True	False	N/A	N/A	N/A			Pass	Fail	N/A	N/A	N/A	Identified	N/A
125	Processed	190522-125		Unknown		1124									SCN-Bimane	T1C1	Target Compound	38	124	2.23	2.2	0.03		M+	N/A	N/A	N/A	N/A	124.1	124.1	-.002 (mmu)	0.04	N/A	N/A	Method	True	False	N/A	N/A	N/A			Pass	Fail	N/A	N/A	N/A	Identified	N/A
125	Processed	190522-125		Unknown		1124									SCN-Bimane IS	T1	Internal Standard	536	1303	2.24	2.24	0.00		M+	1	1	1	N/A	111	111	.000 (mmu)	N/A	N/A	N/A	Method	True	False	N/A	N/A	N/A			Pass	Fail	N/A	N/A	N/A	Identified	N/A
125	Processed	190522-125		Unknown		1124									SCN-Bimane IS	T1C1	Internal Standard	338	1357	2.24	2.24	0.00		M+	N/A	N/A	N/A	N/A	126.1	126.1	-.002 (mmu)	N/A	N/A	N/A	Method	True	False	N/A	N/A	N/A			Pass	Fail	N/A	N/A	N/A	Identified	N/A
126	Processed	190522-126		Unknown		1125									SCN-Bimane	T1	Target Compound	6	2	2.23	2.24	0.01		M+	-0.114	N/A	-0.114	N/A	111	111	.000 (mmu)	0.004	1	646	Method	True	False	N/A	N/A	N/A			Pass	Fail	N/A	N/A	N/A	Identified	N/A
126	Processed	190522-126		Unknown		1125									SCN-Bimane	T1C1	Target Compound	28	14	2.24	2.23	0.01		M+	N/A	N/A	N/A	N/A	124.1	124.1	-.002 (mmu)	0.004	N/A	N/A	Method	True	False	N/A	N/A	N/A			Pass	Fail	N/A	N/A	N/A	Identified	N/A
126	Processed	190522-126		Unknown		1125									SCN-Bimane IS	T1	Internal Standard	305	646	2.24	2.24	0.00		M+	1	1	1	N/A	111	111	.000 (mmu)	N/A	N/A	N/A	Method	True	False	N/A	N/A	N/A			Pass	Fail	N/A	N/A	N/A	Identified	N/A
126	Processed	190522-126		Unknown		1125									SCN-Bimane IS	T1C1	Internal Standard	254	819	2.24	2.23	0.01		M+	N/A	N/A	N/A	N/A	126.1	126.1	-.002 (mmu)	N/A	N/A	N/A	Method	True	False	N/A	N/A	N/A			Pass	Fail	N/A	N/A	N/A	Identified	N/A
127	Processed	190522-127		Unknown		1126									SCN-Bimane	T1	Target Compound	11	5	2.23	2.24	0.01		M+	-0.086	N/A	-0.086	N/A	111	111	.000 (mmu)	0.005	1	940	Method	True	False	N/A	N/A	N/A			Pass	Fail	N/A	N/A	N/A	Identified	N/A
127	Processed	190522-127		Unknown		1126									SCN-Bimane	T1C1	Target Compound	20	20	2.24	2.25	-0.01		M+	N/A	N/A	N/A	N/A	124.1	124.1	-.002 (mmu)	0.005	N/A	N/A	Method	True	False	N/A	N/A	N/A			Pass	Fail	N/A	N/A	N/A	Identified	N/A
127	Processed	190522-127		Unknown		1126									SCN-Bimane IS	T1	Internal Standard	364	940	2.24	2.23	-0.01		M+	1	1	1	N/A	111	111	.000 (mmu)	N/A	N/A	N/A	Method	True	False	N/A	N/A	N/A			Pass	Fail	N/A	N/A	N/A	Identified	N/A
127	Processed	190522-127		Unknown		1126									SCN-Bimane IS	T1C1	Internal Standard	296	1138	2.23	2.24	-0.01		M+	N/A	N/A	N/A	N/A	126.1	126.1	-.002 (mmu)	N/A	N/A	N/A	Method	True	False	N/A	N/A	N/A			Pass	Fail	N/A	N/A	N/A	Identified	N/A
128	Processed	190522-128		Unknown		1127									SCN-Bimane	T1	Target Compound	0	0	2.23	2.21	-0.02		M+	-0.2	N/A	-0.2	N/A	111	111	.000 (mmu)	0	1	724	Method	True	False	N/A	N/A	N/A			Pass	Fail	N/A	N/A	N/A	Identified	N/A
128	Processed	190522-128		Unknown		1127									SCN-Bimane	T1C1	Target Compound	27	15	2.21	2.22	0.00		M+	N/A	N/A	N/A	N/A	124.1	124.1	-.002 (mmu)	0	N/A	N/A	Method	True	False	N/A	N/A	N/A			Pass	Fail	N/A	N/A	N/A	Identified	N/A
128	Processed	190522-128		Unknown		1127									SCN-Bimane IS	T1	Internal Standard	325	724	2.24	2.23	-0.01		M+	1	1	1	N/A	111	111	.000 (mmu)	N/A	N/A	N/A	Method	True	False	N/A	N/A	N/A			Pass	Fail	N/A	N/A	N/A	Identified	N/A
128	Processed	190522-128		Unknown		1127									SCN-Bimane IS	T1C1	Internal Standard	233	723	2.23	2.23	0.00		M+	N/A	N/A	N/A	N/A	126.1	126.1	-.002 (mmu)	N/A	N/A	N/A	Method	True	False	N/A	N/A	N/A			Pass	Fail	N/A	N/A	N/A	Identified	N/A
129	Processed	190522-129		Unknown		M1019									SCN-Bimane	T1	Target Compound	3235	8875	2.23	2.23	0.00		M+	128.556	N/A	128.556	N/A	111	111	.000 (mmu)	5.673	1	1564	Method	True	False	N/A	N/A	N/A			Pass	Pass	N/A	N/A	N/A	Confirmed	N/A
129	Processed	190522-129		Unknown		M1019									SCN-Bimane	T1C1	Target Compound	1570	4013	2.23	2.23	-0.01		M+	N/A	N/A	N/A	N/A	124.1	124.1	-.002 (mmu)	5.673	N/A	N/A	Method	True	False	N/A	N/A	N/A			Pass	Pass	N/A	N/A	N/A	Confirmed	N/A
129	Processed	190522-129		Unknown		M1019									SCN-Bimane IS	T1	Internal Standard	620	1564	2.24	2.23	-0.01		M+	1	1	1	N/A	111	111	.000 (mmu)	N/A	N/A	N/A	Method	True	False	N/A	N/A	N/A			Pass	Pass	N/A	N/A	N/A	Confirmed	N/A
129	Processed	190522-129		Unknown		M1019									SCN-Bimane IS	T1C1	Internal Standard	267	932	2.23	2.24	-0.01		M+	N/A	N/A	N/A	N/A	126.1	126.1	-.002 (mmu)	N/A	N/A	N/A	Method	True	False	N/A	N/A	N/A			Pass	Pass	N/A	N/A	N/A	Confirmed	N/A
130	Processed	190522-130		Unknown		M1018									SCN-Bimane	T1	Target Compound	3443	8524	2.23	2.23	0.00		M+	111.791	N/A	111.791	N/A	111	111	.000 (mmu)	4.935	1	1727	Method	True	False	N/A	N/A	N/A			Pass	Pass	N/A	N/A	N/A	Confirmed	N/A
130	Processed	190522-130		Unknown		M1018									SCN-Bimane	T1C1	Target Compound	1528	4132	2.23	2.23	0.00		M+	N/A	N/A	N/A	N/A	124.1	124.1	-.002 (mmu)	4.935	N/A	N/A	Method	True	False	N/A	N/A	N/A			Pass	Pass	N/A	N/A	N/A	Confirmed	N/A
130	Processed	190522-130		Unknown		M1018									SCN-Bimane IS	T1	Internal Standard	721	1727	2.24	2.24	0.00		M+	1	1	1	N/A	111	111	.000 (mmu)	N/A	N/A	N/A	Method	True	False	N/A	N/A	N/A			Pass	Pass	N/A	N/A	N/A	Confirmed	N/A
130	Processed	190522-130		Unknown		M1018									SCN-Bimane IS	T1C1	Internal Standard	369	937	2.24	2.23	0.01		M+	N/A	N/A	N/A	N/A	126.1	126.1	-.002 (mmu)	N/A	N/A	N/A	Method	True	False	N/A	N/A	N/A			Pass	Pass	N/A	N/A	N/A	Confirmed	N/A
131	Processed	190522-131		Unknown		M1017									SCN-Bimane	T1	Target Compound	4650	12124	2.23	2.23	0.00		M+	127.235	N/A	127.235	N/A	111	111	.000 (mmu)	5.615	1	2159	Method	True	False	N/A	N/A	N/A			Pass	Pass	N/A	N/A	N/A	Confirmed	N/A
131	Processed	190522-131		Unknown		M1017									SCN-Bimane	T1C1	Target Compound	2185	5543	2.23	2.23	0.00		M+	N/A	N/A	N/A	N/A	124.1	124.1	-.002 (mmu)	5.615	N/A	N/A	Method	True	False	N/A	N/A	N/A			Pass	Pass	N/A	N/A	N/A	Confirmed	N/A
131	Processed	190522-131		Unknown		M1017									SCN-Bimane IS	T1	Internal Standard	830	2159	2.24	2.23	-0.01		M+	1	1	1	N/A	111	111	.000 (mmu)	N/A	N/A	N/A	Method	True	False	N/A	N/A	N/A			Pass	Fail	N/A	N/A	N/A	Identified	N/A
131	Processed	190522-131		Unknown		M1017									SCN-Bimane IS	T1C1	Internal Standard	389	1117	2.23	2.21	0.02		M+	N/A	N/A	N/A	N/A	126.1	126.1	-.002 (mmu)	N/A	N/A	N/A	Method	True	False	N/A	N/A	N/A			Pass	Fail	N/A	N/A	N/A	Identified	N/A
132	Processed	190522-132		Matrix Blank		0ppb									SCN-Bimane	T1	Target Compound	24	13	2.23	2.16	-0.07		M+	-0.047	N/A	-0.047	N/A	111	111	.000 (mmu)	0.007	1	1934	Method	True	False	N/A	N/A	N/A			Pass	Fail	N/A	N/A	N/A	Identified	N/A
132	Processed	190522-132		Matrix Blank		0ppb									SCN-Bimane	T1C1	Target Compound	1	0	2.16	2.15	0.01		M+	N/A	N/A	N/A	N/A	124.1	124.1	-.002 (mmu)	0.007	N/A	N/A	Method	True	False	N/A	N/A	N/A			Pass	Fail	N/A	N/A	N/A	Identified	N/A
132	Processed	190522-132		Matrix Blank		0ppb									SCN-Bimane IS	T1	Internal Standard	814	1934	2.24	2.24	0.00		M+	1	1	1	N/A	111	111	.000 (mmu)	N/A	N/A	N/A	Method	True	False	N/A	N/A	N/A			Pass	Pass	N/A	N/A	N/A	Confirmed	N/A
132	Processed	190522-132		Matrix Blank		0ppb									SCN-Bimane IS	T1C1	Internal Standard	484	1199	2.24	2.23	0.01		M+	N/A	N/A	N/A	N/A	126.1	126.1	-.002 (mmu)	N/A	N/A	N/A	Method	True	False	N/A	N/A	N/A			Pass	Pass	N/A	N/A	N/A	Confirmed	N/A
133	Processed	190522-133		Cal Std	1	5ppb									SCN-Bimane	T1	Target Compound	263	685	2.23	2.24	0.01		M+	4.856	5	4.856	N/A	111	111	.000 (mmu)	0.223	1	3076	Method	True	False	-2.88	N/A	N/A			Pass	Pass	N/A	N/A	N/A	Confirmed	N/A
133	Processed	190522-133		Cal Std	1	5ppb									SCN-Bimane	T1C1	Target Compound	119	389	2.24	2.25	-0.01		M+	N/A	N/A	N/A	N/A	124.1	124.1	-.002 (mmu)	0.223	N/A	N/A	Method	True	False	N/A	N/A	N/A			Pass	Pass	N/A	N/A	N/A	Confirmed	N/A
133	Processed	190522-133		Cal Std	1	5ppb									SCN-Bimane IS	T1	Internal Standard	1125	3076	2.24	2.23	-0.01		M+	1	1	1	N/A	111	111	.000 (mmu)	N/A	N/A	N/A	Method	True	False	0	N/A	N/A			Pass	Fail	N/A	N/A	N/A	Identified	N/A
133	Processed	190522-133		Cal Std	1	5ppb									SCN-Bimane IS	T1C1	Internal Standard	499	1576	2.23	2.24	0.00		M+	N/A	N/A	N/A	N/A	126.1	126.1	-.002 (mmu)	N/A	N/A	N/A	Method	True	False	N/A	N/A	N/A			Pass	Fail	N/A	N/A	N/A	Identified	N/A
134	Processed	190522-134		Cal Std	4	50ppb									SCN-Bimane	T1	Target Compound	2600	6544	2.23	2.23	0.00		M+	52.737	50	52.737	N/A	111	111	.000 (mmu)	2.333	1	2806	Method	True	False	5.47	N/A	N/A			Pass	Pass	N/A	N/A	N/A	Confirmed	N/A
134	Processed	190522-134		Cal Std	4	50ppb									SCN-Bimane	T1C1	Target Compound	1153	2977	2.23	2.24	-0.01		M+	N/A	N/A	N/A	N/A	124.1	124.1	-.002 (mmu)	2.333	N/A	N/A	Method	True	False	N/A	N/A	N/A			Pass	Pass	N/A	N/A	N/A	Confirmed	N/A
134	Processed	190522-134		Cal Std	4	50ppb									SCN-Bimane IS	T1	Internal Standard	1057	2806	2.24	2.24	0.00		M+	1	1	1	N/A	111	111	.000 (mmu)	N/A	N/A	N/A	Method	True	False	0	N/A	N/A			Pass	Pass	N/A	N/A	N/A	Confirmed	N/A
134	Processed	190522-134		Cal Std	4	50ppb									SCN-Bimane IS	T1C1	Internal Standard	580	1558	2.24	2.24	0.00		M+	N/A	N/A	N/A	N/A	126.1	126.1	-.002 (mmu)	N/A	N/A	N/A	Method	True	False	N/A	N/A	N/A			Pass	Pass	N/A	N/A	N/A	Confirmed	N/A
135	Processed	190522-135		Cal Std	6	100ppb									SCN-Bimane	T1	Target Compound	3527	8924	2.23	2.23	0.00		M+	97.407	100	97.407	N/A	111	111	.000 (mmu)	4.301	1	2075	Method	True	False	-2.59	N/A	N/A			Pass	Pass	N/A	N/A	N/A	Confirmed	N/A
135	Processed	190522-135		Cal Std	6	100ppb									SCN-Bimane	T1C1	Target Compound	1600	3917	2.23	2.23	0.00		M+	N/A	N/A	N/A	N/A	124.1	124.1	-.002 (mmu)	4.301	N/A	N/A	Method	True	False	N/A	N/A	N/A			Pass	Pass	N/A	N/A	N/A	Confirmed	N/A
135	Processed	190522-135		Cal Std	6	100ppb									SCN-Bimane IS	T1	Internal Standard	833	2075	2.24	2.23	-0.01		M+	1	1	1	N/A	111	111	.000 (mmu)	N/A	N/A	N/A	Method	True	False	0	N/A	N/A			Pass	Fail	N/A	N/A	N/A	Identified	N/A
135	Processed	190522-135		Cal Std	6	100ppb									SCN-Bimane IS	T1C1	Internal Standard	541	1883	2.23	2.22	0.02		M+	N/A	N/A	N/A	N/A	126.1	126.1	-.002 (mmu)	N/A	N/A	N/A	Method	True	False	N/A	N/A	N/A			Pass	Fail	N/A	N/A	N/A	Identified	N/A
136	Processed	190522-136		Unknown		353									SCN-Bimane	T1	Target Compound	145	246	2.23	2.23	0.00		M+	3.061	N/A	3.061	N/A	111	111	.000 (mmu)	0.144	1	1712	Method	True	False	N/A	N/A	N/A			Pass	Fail	N/A	N/A	N/A	Identified	N/A
136	Processed	190522-136		Unknown		353									SCN-Bimane	T1C1	Target Compound	85	160	2.23	2.22	0.02		M+	N/A	N/A	N/A	N/A	124.1	124.1	-.002 (mmu)	0.144	N/A	N/A	Method	True	False	N/A	N/A	N/A			Pass	Fail	N/A	N/A	N/A	Identified	N/A
136	Processed	190522-136		Unknown		353									SCN-Bimane IS	T1	Internal Standard	668	1712	2.24	2.24	0.00		M+	1	1	1	N/A	111	111	.000 (mmu)	N/A	N/A	N/A	Method	True	False	N/A	N/A	N/A			Pass	Pass	N/A	N/A	N/A	Confirmed	N/A
136	Processed	190522-136		Unknown		353									SCN-Bimane IS	T1C1	Internal Standard	359	1155	2.24	2.22	0.02		M+	N/A	N/A	N/A	N/A	126.1	126.1	-.002 (mmu)	N/A	N/A	N/A	Method	True	False	N/A	N/A	N/A			Pass	Pass	N/A	N/A	N/A	Confirmed	N/A
137	Processed	190522-137		Unknown		354									SCN-Bimane	T1	Target Compound	181	289	2.23	2.23	0.00		M+	3.061	N/A	3.061	N/A	111	111	.000 (mmu)	0.144	1	2009	Method	True	False	N/A	N/A	N/A			Pass	Fail	N/A	N/A	N/A	Identified	N/A
137	Processed	190522-137		Unknown		354									SCN-Bimane	T1C1	Target Compound	117	316	2.23	2.24	-0.01		M+	N/A	N/A	N/A	N/A	124.1	124.1	-.002 (mmu)	0.144	N/A	N/A	Method	True	False	N/A	N/A	N/A			Pass	Fail	N/A	N/A	N/A	Identified	N/A
137	Processed	190522-137		Unknown		354									SCN-Bimane IS	T1	Internal Standard	778	2009	2.24	2.25	0.01		M+	1	1	1	N/A	111	111	.000 (mmu)	N/A	N/A	N/A	Method	True	False	N/A	N/A	N/A			Pass	Pass	N/A	N/A	N/A	Confirmed	N/A
137	Processed	190522-137		Unknown		354									SCN-Bimane IS	T1C1	Internal Standard	426	1298	2.25	2.23	0.01		M+	N/A	N/A	N/A	N/A	126.1	126.1	-.002 (mmu)	N/A	N/A	N/A	Method	True	False	N/A	N/A	N/A			Pass	Pass	N/A	N/A	N/A	Confirmed	N/A
138	Processed	190522-138		Unknown		355									SCN-Bimane	T1	Target Compound	172	322	2.23	2.23	0.00		M+	4.281	N/A	4.281	N/A	111	111	.000 (mmu)	0.197	1	1631	Method	True	False	N/A	N/A	N/A			Pass	Pass	N/A	N/A	N/A	Confirmed	N/A
138	Processed	190522-138		Unknown		355									SCN-Bimane	T1C1	Target Compound	83	157	2.23	2.23	0.01		M+	N/A	N/A	N/A	N/A	124.1	124.1	-.002 (mmu)	0.197	N/A	N/A	Method	True	False	N/A	N/A	N/A			Pass	Pass	N/A	N/A	N/A	Confirmed	N/A
138	Processed	190522-138		Unknown		355									SCN-Bimane IS	T1	Internal Standard	669	1631	2.24	2.24	0.00		M+	1	1	1	N/A	111	111	.000 (mmu)	N/A	N/A	N/A	Method	True	False	N/A	N/A	N/A			Pass	Fail	N/A	N/A	N/A	Identified	N/A
138	Processed	190522-138		Unknown		355									SCN-Bimane IS	T1C1	Internal Standard	471	1688	2.24	2.24	-0.01		M+	N/A	N/A	N/A	N/A	126.1	126.1	-.002 (mmu)	N/A	N/A	N/A	Method	True	False	N/A	N/A	N/A			Pass	Fail	N/A	N/A	N/A	Identified	N/A
139	Processed	190522-139		Unknown		356									SCN-Bimane	T1	Target Compound	159	372	2.23	2.23	0.00		M+	4.62	N/A	4.62	N/A	111	111	.000 (mmu)	0.212	1	1752	Method	True	False	N/A	N/A	N/A			Pass	Pass	N/A	N/A	N/A	Confirmed	N/A
139	Processed	190522-139		Unknown		356									SCN-Bimane	T1C1	Target Compound	90	167	2.23	2.23	0.00		M+	N/A	N/A	N/A	N/A	124.1	124.1	-.002 (mmu)	0.212	N/A	N/A	Method	True	False	N/A	N/A	N/A			Pass	Pass	N/A	N/A	N/A	Confirmed	N/A
139	Processed	190522-139		Unknown		356									SCN-Bimane IS	T1	Internal Standard	677	1752	2.24	2.23	-0.01		M+	1	1	1	N/A	111	111	.000 (mmu)	N/A	N/A	N/A	Method	True	False	N/A	N/A	N/A			Pass	Pass	N/A	N/A	N/A	Confirmed	N/A
139	Processed	190522-139		Unknown		356									SCN-Bimane IS	T1C1	Internal Standard	510	1026	2.23	2.23	0.00		M+	N/A	N/A	N/A	N/A	126.1	126.1	-.002 (mmu)	N/A	N/A	N/A	Method	True	False	N/A	N/A	N/A			Pass	Pass	N/A	N/A	N/A	Confirmed	N/A
140	Processed	190522-140		Unknown		357									SCN-Bimane	T1	Target Compound	137	235	2.23	2.24	0.01		M+	4.45	N/A	4.45	N/A	111	111	.000 (mmu)	0.205	1	1147	Method	True	False	N/A	N/A	N/A			Pass	Pass	N/A	N/A	N/A	Confirmed	N/A
140	Processed	190522-140		Unknown		357									SCN-Bimane	T1C1	Target Compound	59	128	2.24	2.26	-0.01		M+	N/A	N/A	N/A	N/A	124.1	124.1	-.002 (mmu)	0.205	N/A	N/A	Method	True	False	N/A	N/A	N/A			Pass	Pass	N/A	N/A	N/A	Confirmed	N/A
140	Processed	190522-140		Unknown		357									SCN-Bimane IS	T1	Internal Standard	459	1147	2.24	2.24	0.00		M+	1	1	1	N/A	111	111	.000 (mmu)	N/A	N/A	N/A	Method	True	False	N/A	N/A	N/A			Pass	Pass	N/A	N/A	N/A	Confirmed	N/A
140	Processed	190522-140		Unknown		357									SCN-Bimane IS	T1C1	Internal Standard	261	666	2.24	2.23	0.01		M+	N/A	N/A	N/A	N/A	126.1	126.1	-.002 (mmu)	N/A	N/A	N/A	Method	True	False	N/A	N/A	N/A			Pass	Pass	N/A	N/A	N/A	Confirmed	N/A
141	Processed	190522-141		Unknown		358									SCN-Bimane	T1	Target Compound	170	310	2.23	2.23	0.00		M+	4.761	N/A	4.761	N/A	111	111	.000 (mmu)	0.219	1	1417	Method	True	False	N/A	N/A	N/A			Pass	Pass	N/A	N/A	N/A	Confirmed	N/A
141	Processed	190522-141		Unknown		358									SCN-Bimane	T1C1	Target Compound	86	180	2.23	2.22	0.01		M+	N/A	N/A	N/A	N/A	124.1	124.1	-.002 (mmu)	0.219	N/A	N/A	Method	True	False	N/A	N/A	N/A			Pass	Pass	N/A	N/A	N/A	Confirmed	N/A
141	Processed	190522-141		Unknown		358									SCN-Bimane IS	T1	Internal Standard	569	1417	2.24	2.23	-0.01		M+	1	1	1	N/A	111	111	.000 (mmu)	N/A	N/A	N/A	Method	True	False	N/A	N/A	N/A			Pass	Fail	N/A	N/A	N/A	Identified	N/A
141	Processed	190522-141		Unknown		358									SCN-Bimane IS	T1C1	Internal Standard	467	1291	2.23	2.24	-0.01		M+	N/A	N/A	N/A	N/A	126.1	126.1	-.002 (mmu)	N/A	N/A	N/A	Method	True	False	N/A	N/A	N/A			Pass	Fail	N/A	N/A	N/A	Identified	N/A
[truncated: 15 more columns]

## Sheet: Data
	Sample ID	Analyte Area	IS Area	Area Ratio	Calculated Amt	Concentration Ratio
	5ppb	685	3076	0.222692	4.856	0.0458591
	50ppb	6544	2806	2.33215	52.737	0.0442222
	100ppb	8924	2075	4.30072	97.407	0.0441521
	353	246	1712	0.143692	1.703	0.0843754
	354	289	2009	0.143853	1.70676	0.084284
	355	322	1631	0.197425	2.95667	0.0667728
	356	372	1752	0.212329	3.30439	0.0642565
	357	235	1147	0.204882	3.13066	0.0654439
	358	310	1417	0.218772	3.45472	0.0633255
