# Supplementary material for: The determination of thiocyanate in the blood plasma and holding water of Amphiprion clarkii after exposure to cyanide
Source: PeerJ. 2021 Dec 7;9:e12409. doi: 10.7717/peerj.12409 (PMC8663612; doi:10.7717/peerj.12409)
Supplement: Supplemental Information 8 [file peerj-09-12409-s008.xlsx]

## Sheet: All Samples
Acquisition Order	Status	Filename	Sample Type	Level	Excluded	Sample ID	Sample Name	Comments	ColumnHeader1	ColumnHeader2	ColumnHeader3	ColumnHeader4	ColumnHeader5	ColumnHeader6	Confirm	Formula	Compound	m/z (Expected)	Area	Calculated Amt	Theoretical Amt	%Diff	Compound Type	Height	Expected RT	Actual RT	RT Delta	Adduct	m/z (Apex)	Sample Amt	m/z (Delta(ppm))	Active	Response Ratio	ISTD Amt	ISTD Response	Integration Mode	%RSD	%CV	Channel	Final Units	PK	IR	IP	LS	FI	Isotopic Pattern Score (%)	Num Isotopes Matched	Lib Match Name	Library Score (%)
1	Processed	191107-001	Matrix Blank		False	Blank									Identified	C11H11N3O2S	SCNBimane	248.05	17855	0.664	N/A	N/A	Target Compound	10079	1.8	1.83	0.03	M-H	248.049	0.664	-2.3718	True	0.009	1	1929689	Method	N/A	N/A		PPB	Pass	Pass	Fail	N/A	Pass	100	1 of 1	N/A	N/A
1	Processed	191107-001	Matrix Blank		False	Blank									Confirmed	C10[13]CH11N2[15]NO2S	SCNBimaneIS	250.05	1929689	1	1	N/A	Internal Standard	515483	1.8	1.82	0.02	M-H	250.05	1	-1.0445	True	N/A	N/A	N/A	Method	N/A	N/A			Pass	Pass	Pass	N/A	Pass	100	3 of 3	N/A	N/A
2	Processed	191107-002	Cal Std	STD 1	False	5 ppb									Confirmed	C11H11N3O2S	SCNBimane	248.05	482225	5.44	5	8.81	Target Compound	136488	1.8	1.81	0.01	M-H	248.05	5.44	-0.834	True	0.283	1	1701810	Method	N/A	N/A		PPB	Pass	Pass	Pass	N/A	Pass	62.9032	2 of 5	N/A	N/A
2	Processed	191107-002	Cal Std	STD 1	False	5 ppb									Confirmed	C10[13]CH11N2[15]NO2S	SCNBimaneIS	250.05	1701810	1	1	0	Internal Standard	434945	1.8	1.81	0.01	M-H	250.05	1	-0.6173	True	N/A	N/A	N/A	Method	N/A	N/A			Pass	Pass	Pass	N/A	Pass	100	5 of 5	N/A	N/A
3	Processed	191107-003	Cal Std	STD 2	False	10 ppb									Identified	C11H11N3O2S	SCNBimane	248.05	833369	9.437	10	-5.63	Target Compound	231569	1.8	1.81	0.01	M-H	248.05	9.437	-0.957	True	0.513	1	1625418	Method	N/A	N/A		PPB	Pass	Pass	Fail	N/A	Pass	58.4587	3 of 5	N/A	N/A
3	Processed	191107-003	Cal Std	STD 2	False	10 ppb									Confirmed	C10[13]CH11N2[15]NO2S	SCNBimaneIS	250.05	1625418	1	1	0	Internal Standard	411064	1.8	1.81	0.01	M-H	250.05	1	-0.8004	True	N/A	N/A	N/A	Method	N/A	N/A			Pass	Pass	Pass	N/A	Pass	100	5 of 5	N/A	N/A
4	Processed	191107-004	Cal Std	STD 3	False	25 ppb									Confirmed	C11H11N3O2S	SCNBimane	248.05	2403779	26.166	25	4.66	Target Compound	663780	1.8	1.8	0.00	M-H	248.05	26.166	-1.2646	True	1.473	1	1632206	Method	N/A	N/A		PPB	Pass	Pass	Pass	N/A	Pass	72.4596	3 of 5	N/A	N/A
4	Processed	191107-004	Cal Std	STD 3	False	25 ppb									Confirmed	C10[13]CH11N2[15]NO2S	SCNBimaneIS	250.05	1632206	1	1	0	Internal Standard	414670	1.8	1.8	0.00	M-H	250.05	1	-0.8004	True	N/A	N/A	N/A	Method	N/A	N/A			Pass	Pass	Pass	N/A	Pass	100	5 of 5	N/A	N/A
5	Processed	191107-005	Cal Std	STD 4	False	50 ppb									Confirmed	C11H11N3O2S	SCNBimane	248.05	3875969	43.202	50	-13.6	Target Compound	1047933	1.8	1.81	0.01	M-H	248.05	43.202	-1.3261	True	2.45	1	1581769	Method	N/A	N/A		PPB	Pass	Pass	Pass	N/A	Pass	83.7957	3 of 5	N/A	N/A
5	Processed	191107-005	Cal Std	STD 4	False	50 ppb									Confirmed	C10[13]CH11N2[15]NO2S	SCNBimaneIS	250.05	1581769	1	1	0	Internal Standard	401381	1.8	1.81	0.01	M-H	250.05	1	-0.6173	True	N/A	N/A	N/A	Method	N/A	N/A			Pass	Pass	Pass	N/A	Pass	96.53	4 of 5	N/A	N/A
6	Processed	191107-006	Cal Std	STD 5	False	100 ppb									Confirmed	C11H11N3O2S	SCNBimane	248.05	8593365	105.755	100	5.75	Target Compound	2378874	1.8	1.81	0.01	M-H	248.05	105.755	-1.3261	True	6.04	1	1422724	Method	N/A	N/A		PPB	Pass	Pass	Pass	N/A	Pass	92.5846	6 of 8	N/A	N/A
6	Processed	191107-006	Cal Std	STD 5	False	100 ppb									Confirmed	C10[13]CH11N2[15]NO2S	SCNBimaneIS	250.05	1422724	1	1	0	Internal Standard	362740	1.8	1.81	0.01	M-H	250.05	1	0.359	True	N/A	N/A	N/A	Method	N/A	N/A			Pass	Pass	Pass	N/A	Pass	94.5366	4 of 5	N/A	N/A
7	Processed	191107-007	Unknown		False	500 ppb									Confirmed	C11H11N3O2S	SCNBimane	248.05	28642663	308.23	N/A	N/A	Target Compound	7807781	1.8	1.8	0.00	M-H	248.05	308.23	-1.2646	True	17.66	1	1621940	Method	N/A	N/A		PPB	Pass	Pass	Pass	N/A	Pass	100	8 of 9	N/A	N/A
7	Processed	191107-007	Unknown		False	500 ppb									Confirmed	C10[13]CH11N2[15]NO2S	SCNBimaneIS	250.05	1621940	1	1	N/A	Internal Standard	416348	1.8	1.8	0.00	M-H	250.05	1	-0.9224	True	N/A	N/A	N/A	Method	N/A	N/A			Pass	Pass	Pass	N/A	Pass	100	5 of 5	N/A	N/A
8	Processed	191107-008	Unknown		False	Plasama 01									Confirmed	C11H11N3O2S	SCNBimane	248.05	2048639	21.245	N/A	N/A	Target Compound	563582	1.8	1.8	0.00	M-H	248.05	21.245	-1.0185	True	1.19	1	1721048	Method	N/A	N/A		PPB	Pass	Pass	Pass	N/A	Pass	64.0461	3 of 5	N/A	N/A
8	Processed	191107-008	Unknown		False	Plasama 01									Confirmed	C10[13]CH11N2[15]NO2S	SCNBimaneIS	250.05	1721048	1	1	N/A	Internal Standard	434963	1.8	1.8	0.00	M-H	250.05	1	-0.5563	True	N/A	N/A	N/A	Method	N/A	N/A			Pass	Pass	Pass	N/A	Pass	96.5722	4 of 5	N/A	N/A
9	Processed	191107-009	Unknown		False	Plasama 02									Identified	C11H11N3O2S	SCNBimane	248.05	86996	1.385	N/A	N/A	Target Compound	27670	1.8	1.81	0.01	M-H	248.05	1.385	-0.8955	True	0.051	1	1718116	Method	N/A	N/A		PPB	Pass	Pass	Fail	N/A	Pass	0	2 of 3	N/A	N/A
9	Processed	191107-009	Unknown		False	Plasama 02									Confirmed	C10[13]CH11N2[15]NO2S	SCNBimaneIS	250.05	1718116	1	1	N/A	Internal Standard	441584	1.8	1.81	0.01	M-H	250.05	1	-0.9224	True	N/A	N/A	N/A	Method	N/A	N/A			Pass	Pass	Pass	N/A	Pass	96.479	4 of 5	N/A	N/A
10	Processed	191107-010	Unknown		False	Plasama 03									Confirmed	C11H11N3O2S	SCNBimane	248.05	151428	2.084	N/A	N/A	Target Compound	42501	1.8	1.81	0.01	M-H	248.05	2.084	-1.1415	True	0.091	1	1668704	Method	N/A	N/A		PPB	Pass	Pass	Pass	N/A	Pass	67.1056	2 of 3	N/A	N/A
10	Processed	191107-010	Unknown		False	Plasama 03									Confirmed	C10[13]CH11N2[15]NO2S	SCNBimaneIS	250.05	1668704	1	1	N/A	Internal Standard	419915	1.8	1.8	0.00	M-H	250.05	1	-0.8004	True	N/A	N/A	N/A	Method	N/A	N/A			Pass	Pass	Pass	N/A	Pass	98.196	4 of 5	N/A	N/A
11	Processed	191107-011	Unknown		False	Plasama 04									Confirmed	C11H11N3O2S	SCNBimane	248.05	152129	2.019	N/A	N/A	Target Compound	41571	1.8	1.8	0.00	M-H	248.05	2.019	-1.4491	True	0.087	1	1748784	Method	N/A	N/A		PPB	Pass	Pass	Pass	N/A	Pass	66.9548	3 of 4	N/A	N/A
11	Processed	191107-011	Unknown		False	Plasama 04									Confirmed	C10[13]CH11N2[15]NO2S	SCNBimaneIS	250.05	1748784	1	1	N/A	Internal Standard	446844	1.8	1.8	0.00	M-H	250.05	1	-1.1055	True	N/A	N/A	N/A	Method	N/A	N/A			Pass	Pass	Pass	N/A	Pass	100	5 of 5	N/A	N/A
12	Processed	191107-012	Unknown		False	Plasama 05									Identified	C11H11N3O2S	SCNBimane	248.05	131319	1.69	N/A	N/A	Target Compound	38362	1.8	1.8	0.00	M-H	248.05	1.69	-1.3261	True	0.068	1	1926668	Method	N/A	N/A		PPB	Pass	Pass	Fail	N/A	Pass	8.25026	2 of 3	N/A	N/A
12	Processed	191107-012	Unknown		False	Plasama 05									Confirmed	C10[13]CH11N2[15]NO2S	SCNBimaneIS	250.05	1926668	1	1	N/A	Internal Standard	493706	1.8	1.8	0.00	M-H	250.05	1	-1.1055	True	N/A	N/A	N/A	Method	N/A	N/A			Pass	Pass	Pass	N/A	Pass	100	5 of 5	N/A	N/A
13	Processed	191107-013	Unknown		False	Plasama 06									Confirmed	C11H11N3O2S	SCNBimane	248.05	539605	5.759	N/A	N/A	Target Compound	148809	1.8	1.81	0.01	M-H	248.05	5.759	-1.2646	True	0.302	1	1788953	Method	N/A	N/A		PPB	Pass	Pass	Pass	N/A	Pass	63.0185	2 of 5	N/A	N/A
13	Processed	191107-013	Unknown		False	Plasama 06									Confirmed	C10[13]CH11N2[15]NO2S	SCNBimaneIS	250.05	1788953	1	1	N/A	Internal Standard	453632	1.8	1.81	0.01	M-H	250.05	1	-1.0445	True	N/A	N/A	N/A	Method	N/A	N/A			Pass	Pass	Pass	N/A	Pass	100	5 of 5	N/A	N/A
14	Processed	191107-014	Unknown		False	Plasama 07									Identified	C11H11N3O2S	SCNBimane	248.05	323983	3.819	N/A	N/A	Target Compound	89901	1.8	1.81	0.01	M-H	248.05	3.819	-1.3876	True	0.19	1	1702155	Method	N/A	N/A		PPB	Pass	Pass	Fail	N/A	Pass	40.8487	2 of 4	N/A	N/A
14	Processed	191107-014	Unknown		False	Plasama 07									Confirmed	C10[13]CH11N2[15]NO2S	SCNBimaneIS	250.05	1702155	1	1	N/A	Internal Standard	426994	1.8	1.81	0.01	M-H	250.05	1	-1.3496	True	N/A	N/A	N/A	Method	N/A	N/A			Pass	Pass	Pass	N/A	Pass	100	5 of 5	N/A	N/A
15	Processed	191107-015	Unknown		False	Plasama 08									Identified	C11H11N3O2S	SCNBimane	248.05	391458	4.447	N/A	N/A	Target Compound	107271	1.8	1.81	0.01	M-H	248.05	4.447	-1.1415	True	0.226	1	1729473	Method	N/A	N/A		PPB	Pass	Pass	Fail	N/A	Pass	45.5306	2 of 5	N/A	N/A
15	Processed	191107-015	Unknown		False	Plasama 08									Confirmed	C10[13]CH11N2[15]NO2S	SCNBimaneIS	250.05	1729473	1	1	N/A	Internal Standard	434049	1.8	1.81	0.01	M-H	250.05	1	-0.9835	True	N/A	N/A	N/A	Method	N/A	N/A			Pass	Pass	Pass	N/A	Pass	100	5 of 5	N/A	N/A
16	Processed	191107-016	Unknown		False	Plasama 09									Confirmed	C11H11N3O2S	SCNBimane	248.05	148790	2.131	N/A	N/A	Target Compound	39972	1.8	1.8	0.00	M-H	248.05	2.131	-0.8955	True	0.093	1	1591874	Method	N/A	N/A		PPB	Pass	Pass	Pass	N/A	Pass	66.8028	2 of 3	N/A	N/A
16	Processed	191107-016	Unknown		False	Plasama 09									Confirmed	C10[13]CH11N2[15]NO2S	SCNBimaneIS	250.05	1591874	1	1	N/A	Internal Standard	401961	1.8	1.8	0.00	M-H	250.05	1	-1.0445	True	N/A	N/A	N/A	Method	N/A	N/A			Pass	Pass	Pass	N/A	Pass	100	5 of 5	N/A	N/A
17	Processed	191107-017	Unknown		False	Plasama 10									Confirmed	C11H11N3O2S	SCNBimane	248.05	321701	3.71	N/A	N/A	Target Compound	89961	1.8	1.81	0.01	M-H	248.05	3.71	-1.08	True	0.184	1	1747796	Method	N/A	N/A		PPB	Pass	Pass	Pass	N/A	Pass	63.4255	2 of 4	N/A	N/A
17	Processed	191107-017	Unknown		False	Plasama 10									Confirmed	C10[13]CH11N2[15]NO2S	SCNBimaneIS	250.05	1747796	1	1	N/A	Internal Standard	443837	1.8	1.81	0.01	M-H	250.05	1	-1.1055	True	N/A	N/A	N/A	Method	N/A	N/A			Pass	Pass	Pass	N/A	Pass	100	5 of 5	N/A	N/A
18	Processed	191107-018	Unknown		False	Plasama 11									Identified	C11H11N3O2S	SCNBimane	248.05	132222	1.827	N/A	N/A	Target Compound	35969	1.8	1.8	0.00	M-H	248.05	1.827	-1.2031	True	0.076	1	1740275	Method	N/A	N/A		PPB	Pass	Pass	Fail	N/A	Pass	11.4345	2 of 3	N/A	N/A
18	Processed	191107-018	Unknown		False	Plasama 11									Confirmed	C10[13]CH11N2[15]NO2S	SCNBimaneIS	250.05	1740275	1	1	N/A	Internal Standard	442309	1.8	1.8	0.00	M-H	250.05	1	-1.2886	True	N/A	N/A	N/A	Method	N/A	N/A			Pass	Pass	Pass	N/A	Pass	100	5 of 5	N/A	N/A
19	Processed	191107-019	Unknown		False	Plasama 12									Confirmed	C11H11N3O2S	SCNBimane	248.05	393721	4.462	N/A	N/A	Target Compound	110928	1.8	1.81	0.01	M-H	248.05	4.462	-1.1415	True	0.227	1	1732889	Method	N/A	N/A		PPB	Pass	Pass	Pass	N/A	Pass	62.7473	2 of 5	N/A	N/A
19	Processed	191107-019	Unknown		False	Plasama 12									Confirmed	C10[13]CH11N2[15]NO2S	SCNBimaneIS	250.05	1732889	1	1	N/A	Internal Standard	438148	1.8	1.81	0.01	M-H	250.05	1	-1.1055	True	N/A	N/A	N/A	Method	N/A	N/A			Pass	Pass	Pass	N/A	Pass	100	5 of 5	N/A	N/A
20	Processed	191107-020	Unknown		False	Plasama 13									Confirmed	C11H11N3O2S	SCNBimane	248.05	653024	6.697	N/A	N/A	Target Compound	178155	1.8	1.8	0.00	M-H	248.05	6.697	-1.3261	True	0.355	1	1837023	Method	N/A	N/A		PPB	Pass	Pass	Pass	N/A	Pass	62.7615	3 of 5	N/A	N/A
20	Processed	191107-020	Unknown		False	Plasama 13									Confirmed	C10[13]CH11N2[15]NO2S	SCNBimaneIS	250.05	1837023	1	1	N/A	Internal Standard	457352	1.8	1.8	0.00	M-H	250.05	1	-1.2275	True	N/A	N/A	N/A	Method	N/A	N/A			Pass	Pass	Pass	N/A	Pass	100	5 of 5	N/A	N/A
21	Processed	191107-021	Unknown		False	Plasama 14									Identified	C11H11N3O2S	SCNBimane	248.05	1506167	15.253	N/A	N/A	Target Compound	406014	1.8	1.81	0.01	M-H	248.05	15.253	-1.2646	True	0.846	1	1779342	Method	N/A	N/A		PPB	Pass	Pass	Fail	N/A	Pass	47.9517	3 of 5	N/A	N/A
21	Processed	191107-021	Unknown		False	Plasama 14									Confirmed	C10[13]CH11N2[15]NO2S	SCNBimaneIS	250.05	1779342	1	1	N/A	Internal Standard	445267	1.8	1.81	0.01	M-H	250.05	1	-0.9835	True	N/A	N/A	N/A	Method	N/A	N/A			Pass	Pass	Pass	N/A	Pass	100	5 of 5	N/A	N/A
22	Processed	191107-022	Unknown		False	Plasama 15									Identified	C11H11N3O2S	SCNBimane	248.05	253449	2.928	N/A	N/A	Target Compound	72076	1.8	1.8	0.00	M-H	248.05	2.928	-1.0185	True	0.139	1	1820877	Method	N/A	N/A		PPB	Pass	Pass	Fail	N/A	Pass	31.0068	2 of 4	N/A	N/A
22	Processed	191107-022	Unknown		False	Plasama 15									Confirmed	C10[13]CH11N2[15]NO2S	SCNBimaneIS	250.05	1820877	1	1	N/A	Internal Standard	457655	1.8	1.8	0.00	M-H	250.05	1	-1.1665	True	N/A	N/A	N/A	Method	N/A	N/A			Pass	Pass	Pass	N/A	Pass	100	5 of 5	N/A	N/A
23	Processed	191107-023	Unknown		False	Plasama 16									Identified	C11H11N3O2S	SCNBimane	248.05	1695491	17.888	N/A	N/A	Target Compound	454192	1.8	1.8	0.00	M-H	248.05	17.888	-1.3261	True	0.998	1	1699389	Method	N/A	N/A		PPB	Pass	Pass	Fail	N/A	Pass	57.7113	4 of 6	N/A	N/A
23	Processed	191107-023	Unknown		False	Plasama 16									Confirmed	C10[13]CH11N2[15]NO2S	SCNBimaneIS	250.05	1699389	1	1	N/A	Internal Standard	421094	1.8	1.8	0.00	M-H	250.05	1	-1.0445	True	N/A	N/A	N/A	Method	N/A	N/A			Pass	Pass	Pass	N/A	Pass	100	5 of 5	N/A	N/A
24	Processed	191107-024	Unknown		False	Plasama 17									Confirmed	C11H11N3O2S	SCNBimane	248.05	637240	6.487	N/A	N/A	Target Compound	179880	1.8	1.8	0.00	M-H	248.05	6.487	-1.08	True	0.343	1	1855451	Method	N/A	N/A		PPB	Pass	Pass	Pass	N/A	Pass	63.0713	3 of 5	N/A	N/A
24	Processed	191107-024	Unknown		False	Plasama 17									Confirmed	C10[13]CH11N2[15]NO2S	SCNBimaneIS	250.05	1855451	1	1	N/A	Internal Standard	473861	1.8	1.8	0.00	M-H	250.05	1	-0.9224	True	N/A	N/A	N/A	Method	N/A	N/A			Pass	Pass	Pass	N/A	Pass	100	5 of 5	N/A	N/A
25	Processed	191107-025	Unknown		False	Plasama 18									Confirmed	C11H11N3O2S	SCNBimane	248.05	5216607	48.922	N/A	N/A	Target Compound	1423722	1.8	1.81	0.01	M-H	248.05	48.922	-1.2646	True	2.779	1	1877386	Method	N/A	N/A		PPB	Pass	Pass	Pass	N/A	Pass	86.3219	4 of 7	N/A	N/A
25	Processed	191107-025	Unknown		False	Plasama 18									Confirmed	C10[13]CH11N2[15]NO2S	SCNBimaneIS	250.05	1877386	1	1	N/A	Internal Standard	475218	1.8	1.81	0.01	M-H	250.05	1	-0.4953	True	N/A	N/A	N/A	Method	N/A	N/A			Pass	Pass	Pass	N/A	Pass	100	5 of 5	N/A	N/A
26	Processed	191107-026	Unknown		False	Plasama 19									Identified	C11H11N3O2S	SCNBimane	248.05	305173	3.236	N/A	N/A	Target Compound	86967	1.8	1.8	0.00	M-H	248.05	3.236	-1.2031	True	0.157	1	1945732	Method	N/A	N/A		PPB	Pass	Pass	Fail	N/A	Pass	35.1936	2 of 4	N/A	N/A
26	Processed	191107-026	Unknown		False	Plasama 19									Confirmed	C10[13]CH11N2[15]NO2S	SCNBimaneIS	250.05	1945732	1	1	N/A	Internal Standard	490255	1.8	1.8	0.00	M-H	250.05	1	-1.1665	True	N/A	N/A	N/A	Method	N/A	N/A			Pass	Pass	Pass	N/A	Pass	100	5 of 5	N/A	N/A
27	Processed	191107-027	Unknown		False	Plasama 20									Confirmed	C11H11N3O2S	SCNBimane	248.05	3109535	30.131	N/A	N/A	Target Compound	837696	1.8	1.8	0.00	M-H	248.05	30.131	-1.3876	True	1.7	1	1828851	Method	N/A	N/A		PPB	Pass	Pass	Pass	N/A	Pass	76.715	3 of 5	N/A	N/A
27	Processed	191107-027	Unknown		False	Plasama 20									Confirmed	C10[13]CH11N2[15]NO2S	SCNBimaneIS	250.05	1828851	1	1	N/A	Internal Standard	455740	1.8	1.8	0.00	M-H	250.05	1	-0.9224	True	N/A	N/A	N/A	Method	N/A	N/A			Pass	Pass	Pass	N/A	Pass	98.1668	4 of 5	N/A	N/A
28	Processed	191107-028	Unknown		False	Gill 01									Confirmed	C11H11N3O2S	SCNBimane	248.05	394155	4.886	N/A	N/A	Target Compound	106997	1.8	1.81	0.01	M-H	248.05	4.886	-1.08	True	0.252	1	1567056	Method	N/A	N/A		PPB	Pass	Pass	Pass	N/A	Pass	63.1303	3 of 6	N/A	N/A
28	Processed	191107-028	Unknown		False	Gill 01									Confirmed	C10[13]CH11N2[15]NO2S	SCNBimaneIS	250.05	1567056	1	1	N/A	Internal Standard	398469	1.8	1.81	0.01	M-H	250.05	1	-1.1665	True	N/A	N/A	N/A	Method	N/A	N/A			Pass	Pass	Pass	N/A	Pass	95.9285	4 of 5	N/A	N/A
29	Processed	191107-029	Unknown		False	Gill 02									Confirmed	C11H11N3O2S	SCNBimane	248.05	313893	4.072	N/A	N/A	Target Compound	86386	1.8	1.81	0.01	M-H	248.05	4.072	-1.3261	True	0.205	1	1532572	Method	N/A	N/A		PPB	Pass	Pass	Pass	N/A	Pass	60.7028	3 of 5	N/A	N/A
29	Processed	191107-029	Unknown		False	Gill 02									Confirmed	C10[13]CH11N2[15]NO2S	SCNBimaneIS	250.05	1532572	1	1	N/A	Internal Standard	396204	1.8	1.81	0.01	M-H	250.05	1	-1.1055	True	N/A	N/A	N/A	Method	N/A	N/A			Pass	Pass	Pass	N/A	Pass	100	5 of 5	N/A	N/A
30	Processed	191107-030	Unknown		False	Gill 03									Confirmed	C11H11N3O2S	SCNBimane	248.05	477008	6.284	N/A	N/A	Target Compound	131803	1.8	1.81	0.01	M-H	248.05	6.284	-1.3876	True	0.332	1	1437831	Method	N/A	N/A		PPB	Pass	Pass	Pass	N/A	Pass	60.4226	4 of 6	N/A	N/A
30	Processed	191107-030	Unknown		False	Gill 03									Confirmed	C10[13]CH11N2[15]NO2S	SCNBimaneIS	250.05	1437831	1	1	N/A	Internal Standard	374479	1.8	1.81	0.01	M-H	250.05	1	-1.2886	True	N/A	N/A	N/A	Method	N/A	N/A			Pass	Pass	Pass	N/A	Pass	100	5 of 5	N/A	N/A
31	Processed	191107-031	Unknown		False	Gill 04									Confirmed	C11H11N3O2S	SCNBimane	248.05	250744	3.139	N/A	N/A	Target Compound	70990	1.8	1.81	0.01	M-H	248.05	3.139	-1.2031	True	0.151	1	1657344	Method	N/A	N/A		PPB	Pass	Pass	Pass	N/A	Pass	60.5313	2 of 4	N/A	N/A
31	Processed	191107-031	Unknown		False	Gill 04									Confirmed	C10[13]CH11N2[15]NO2S	SCNBimaneIS	250.05	1657344	1	1	N/A	Internal Standard	418445	1.8	1.81	0.01	M-H	250.05	1	-1.1665	True	N/A	N/A	N/A	Method	N/A	N/A			Pass	Pass	Pass	N/A	Pass	100	5 of 5	N/A	N/A
32	Processed	191107-032	Unknown		False	Gill 05									Confirmed	C11H11N3O2S	SCNBimane	248.05	387953	4.541	N/A	N/A	Target Compound	104791	1.8	1.8	0.00	M-H	248.05	4.541	-1.3261	True	0.232	1	1673866	Method	N/A	N/A		PPB	Pass	Pass	Pass	N/A	Pass	60.0329	3 of 6	N/A	N/A
32	Processed	191107-032	Unknown		False	Gill 05									Confirmed	C10[13]CH11N2[15]NO2S	SCNBimaneIS	250.05	1673866	1	1	N/A	Internal Standard	427482	1.8	1.8	0.00	M-H	250.05	1	-1.2275	True	N/A	N/A	N/A	Method	N/A	N/A			Pass	Pass	Pass	N/A	Pass	100	5 of 5	N/A	N/A
33	Processed	191107-033	Unknown		False	Gill 06									Confirmed	C11H11N3O2S	SCNBimane	248.05	608363	6.669	N/A	N/A	Target Compound	169710	1.8	1.8	0.00	M-H	248.05	6.669	-1.2646	True	0.354	1	1719214	Method	N/A	N/A		PPB	Pass	Pass	Pass	N/A	Pass	60.0441	3 of 5	N/A	N/A
33	Processed	191107-033	Unknown		False	Gill 06									Confirmed	C10[13]CH11N2[15]NO2S	SCNBimaneIS	250.05	1719214	1	1	N/A	Internal Standard	439714	1.8	1.8	0.00	M-H	250.05	1	-1.1665	True	N/A	N/A	N/A	Method	N/A	N/A			Pass	Pass	Pass	N/A	Pass	100	5 of 5	N/A	N/A
34	Processed	191107-034	Unknown		False	Gill 07									Identified	C11H11N3O2S	SCNBimane	248.05	952184	10.829	N/A	N/A	Target Compound	257294	1.8	1.8	0.00	M-H	248.049	10.829	-1.5106	True	0.593	1	1606734	Method	N/A	N/A		PPB	Pass	Pass	Fail	N/A	Pass	57.3833	3 of 5	N/A	N/A
34	Processed	191107-034	Unknown		False	Gill 07									Confirmed	C10[13]CH11N2[15]NO2S	SCNBimaneIS	250.05	1606734	1	1	N/A	Internal Standard	407459	1.8	1.8	0.00	M-H	250.05	1	-1.3496	True	N/A	N/A	N/A	Method	N/A	N/A			Pass	Pass	Pass	N/A	Pass	100	5 of 5	N/A	N/A
35	Processed	191107-035	Unknown		False	Gill 08									Identified	C11H11N3O2S	SCNBimane	248.05	914107	10.646	N/A	N/A	Target Compound	253520	1.8	1.81	0.01	M-H	248.05	10.646	-1.3876	True	0.582	1	1570313	Method	N/A	N/A		PPB	Pass	Pass	Fail	N/A	Pass	57.5856	3 of 5	N/A	N/A
35	Processed	191107-035	Unknown		False	Gill 08									Confirmed	C10[13]CH11N2[15]NO2S	SCNBimaneIS	250.05	1570313	1	1	N/A	Internal Standard	403866	1.8	1.81	0.01	M-H	250.05	1	-1.2275	True	N/A	N/A	N/A	Method	N/A	N/A			Pass	Pass	Pass	N/A	Pass	100	5 of 5	N/A	N/A
36	Processed	191107-036	Unknown		False	Gill 09									Confirmed	C11H11N3O2S	SCNBimane	248.05	220992	2.969	N/A	N/A	Target Compound	62808	1.8	1.8	0.00	M-H	248.05	2.969	-1.2031	True	0.142	1	1561626	Method	N/A	N/A		PPB	Pass	Pass	Pass	N/A	Pass	66.8802	2 of 3	N/A	N/A
36	Processed	191107-036	Unknown		False	Gill 09									Confirmed	C10[13]CH11N2[15]NO2S	SCNBimaneIS	250.05	1561626	1	1	N/A	Internal Standard	407030	1.8	1.8	0.00	M-H	250.05	1	-1.3496	True	N/A	N/A	N/A	Method	N/A	N/A			Pass	Pass	Pass	N/A	Pass	100	5 of 5	N/A	N/A
37	Processed	191107-037	Unknown		False	Gill 10									Confirmed	C11H11N3O2S	SCNBimane	248.05	700561	7.142	N/A	N/A	Target Compound	193548	1.8	1.8	0.00	M-H	248.05	7.142	-1.3261	True	0.381	1	1838628	Method	N/A	N/A		PPB	Pass	Pass	Pass	N/A	Pass	60.0522	3 of 5	N/A	N/A
37	Processed	191107-037	Unknown		False	Gill 10									Confirmed	C10[13]CH11N2[15]NO2S	SCNBimaneIS	250.05	1838628	1	1	N/A	Internal Standard	479161	1.8	1.8	0.00	M-H	250.05	1	-1.3496	True	N/A	N/A	N/A	Method	N/A	N/A			Pass	Pass	Pass	N/A	Pass	100	5 of 5	N/A	N/A
38	Processed	191107-038	Unknown		False	Gill 11									Identified	C11H11N3O2S	SCNBimane	248.05	516894	6.694	N/A	N/A	Target Compound	146551	1.8	1.81	0.01	M-H	248.05	6.694	-1.3876	True	0.355	1	1454818	Method	N/A	N/A		PPB	Pass	Pass	Fail	N/A	Pass	51.3787	3 of 5	N/A	N/A
38	Processed	191107-038	Unknown		False	Gill 11									Confirmed	C10[13]CH11N2[15]NO2S	SCNBimaneIS	250.05	1454818	1	1	N/A	Internal Standard	375682	1.8	1.81	0.01	M-H	250.05	1	-1.4106	True	N/A	N/A	N/A	Method	N/A	N/A			Pass	Pass	Pass	N/A	Pass	100	5 of 5	N/A	N/A
39	Processed	191107-039	Unknown		False	Gill 12									Confirmed	C11H11N3O2S	SCNBimane	248.05	454467	5.111	N/A	N/A	Target Compound	126973	1.8	1.81	0.01	M-H	248.049	5.111	-1.6337	True	0.264	1	1718631	Method	N/A	N/A		PPB	Pass	Pass	Pass	N/A	Pass	61.9629	2 of 5	N/A	N/A
39	Processed	191107-039	Unknown		False	Gill 12									Confirmed	C10[13]CH11N2[15]NO2S	SCNBimaneIS	250.05	1718631	1	1	N/A	Internal Standard	433285	1.8	1.81	0.01	M-H	250.05	1	-1.5937	True	N/A	N/A	N/A	Method	N/A	N/A			Pass	Pass	Pass	N/A	Pass	100	5 of 5	N/A	N/A
40	Processed	191107-040	Unknown		False	Gill 13									Identified	C11H11N3O2S	SCNBimane	248.05	973680	10.581	N/A	N/A	Target Compound	264819	1.8	1.8	0.00	M-H	248.049	10.581	-1.5721	True	0.578	1	1683434	Method	N/A	N/A		PPB	Pass	Pass	Fail	N/A	Pass	57.3723	3 of 5	N/A	N/A
40	Processed	191107-040	Unknown		False	Gill 13									Confirmed	C10[13]CH11N2[15]NO2S	SCNBimaneIS	250.05	1683434	1	1	N/A	Internal Standard	431298	1.8	1.8	0.00	M-H	250.05	1	-1.3496	True	N/A	N/A	N/A	Method	N/A	N/A			Pass	Pass	Pass	N/A	Pass	100	5 of 5	N/A	N/A
41	Processed	191107-041	Unknown		False	Gill 14									Confirmed	C11H11N3O2S	SCNBimane	248.05	2797083	27.147	N/A	N/A	Target Compound	768301	1.8	1.8	0.00	M-H	248.049	27.147	-1.7567	True	1.529	1	1829304	Method	N/A	N/A		PPB	Pass	Pass	Pass	N/A	Pass	72.6021	3 of 5	N/A	N/A
41	Processed	191107-041	Unknown		False	Gill 14									Confirmed	C10[13]CH11N2[15]NO2S	SCNBimaneIS	250.05	1829304	1	1	N/A	Internal Standard	479476	1.8	1.8	0.00	M-H	250.05	1	-1.3496	True	N/A	N/A	N/A	Method	N/A	N/A			Pass	Pass	Pass	N/A	Pass	100	5 of 5	N/A	N/A
42	Processed	191107-042	Unknown		False	Gill 15									Confirmed	C11H11N3O2S	SCNBimane	248.05	821608	8.678	N/A	N/A	Target Compound	222382	1.8	1.8	0.00	M-H	248.05	8.678	-1.3261	True	0.469	1	1751259	Method	N/A	N/A		PPB	Pass	Pass	Pass	N/A	Pass	60.1029	3 of 5	N/A	N/A
42	Processed	191107-042	Unknown		False	Gill 15									Confirmed	C10[13]CH11N2[15]NO2S	SCNBimaneIS	250.05	1751259	1	1	N/A	Internal Standard	442122	1.8	1.8	0.00	M-H	250.05	1	-1.2275	True	N/A	N/A	N/A	Method	N/A	N/A			Pass	Pass	Pass	N/A	Pass	100	5 of 5	N/A	N/A
43	Processed	191107-043	Unknown		False	Gill 16									Identified	C11H11N3O2S	SCNBimane	248.05	1846981	18.869	N/A	N/A	Target Compound	517174	1.8	1.8	0.00	M-H	248.049	18.869	-1.6337	True	1.054	1	1752363	Method	N/A	N/A		PPB	Pass	Pass	Fail	N/A	Pass	58.3984	3 of 5	N/A	N/A
43	Processed	191107-043	Unknown		False	Gill 16									Confirmed	C10[13]CH11N2[15]NO2S	SCNBimaneIS	250.05	1752363	1	1	N/A	Internal Standard	448857	1.8	1.8	0.00	M-H	250.05	1	-1.2275	True	N/A	N/A	N/A	Method	N/A	N/A			Pass	Pass	Pass	N/A	Pass	100	5 of 5	N/A	N/A
44	Processed	191107-044	Unknown		False	Gill 17									Identified	C11H11N3O2S	SCNBimane	248.05	1640875	16.323	N/A	N/A	Target Compound	457608	1.8	1.8	0.00	M-H	248.049	16.323	-1.6337	True	0.908	1	1807374	Method	N/A	N/A		PPB	Pass	Pass	Fail	N/A	Pass	51.0557	3 of 5	N/A	N/A
44	Processed	191107-044	Unknown		False	Gill 17									Confirmed	C10[13]CH11N2[15]NO2S	SCNBimaneIS	250.05	1807374	1	1	N/A	Internal Standard	465345	1.8	1.8	0.00	M-H	250.05	1	-1.3496	True	N/A	N/A	N/A	Method	N/A	N/A			Pass	Pass	Pass	N/A	Pass	100	5 of 5	N/A	N/A
45	Processed	191107-045	Unknown		False	Gill 18									Confirmed	C11H11N3O2S	SCNBimane	248.05	2904245	28.324	N/A	N/A	Target Compound	798434	1.8	1.8	0.00	M-H	248.05	28.324	-1.4491	True	1.597	1	1819014	Method	N/A	N/A		PPB	Pass	Pass	Pass	N/A	Pass	73.8933	3 of 5	N/A	N/A
45	Processed	191107-045	Unknown		False	Gill 18									Confirmed	C10[13]CH11N2[15]NO2S	SCNBimaneIS	250.05	1819014	1	1	N/A	Internal Standard	472182	1.8	1.8	0.00	M-H	250.05	1	-1.0445	True	N/A	N/A	N/A	Method	N/A	N/A			Pass	Pass	Pass	N/A	Pass	100	5 of 5	N/A	N/A
46	Processed	191107-046	Unknown		False	Gill 19									Identified	C11H11N3O2S	SCNBimane	248.05	961194	10.447	N/A	N/A	Target Compound	265727	1.8	1.81	0.01	M-H	248.049	10.447	-1.6952	True	0.571	1	1684341	Method	N/A	N/A		PPB	Pass	Pass	Fail	N/A	Pass	57.2981	3 of 5	N/A	N/A
46	Processed	191107-046	Unknown		False	Gill 19									Confirmed	C10[13]CH11N2[15]NO2S	SCNBimaneIS	250.05	1684341	1	1	N/A	Internal Standard	428822	1.8	1.81	0.01	M-H	250.05	1	-1.4716	True	N/A	N/A	N/A	Method	N/A	N/A			Pass	Pass	Pass	N/A	Pass	100	5 of 5	N/A	N/A
47	Processed	191107-047	Unknown		False	Gill 20									Confirmed	C11H11N3O2S	SCNBimane	248.05	2317781	23.399	N/A	N/A	Target Compound	627476	1.8	1.8	0.00	M-H	248.049	23.399	-1.5721	True	1.314	1	1763956	Method	N/A	N/A		PPB	Pass	Pass	Pass	N/A	Pass	67.7934	3 of 5	N/A	N/A
47	Processed	191107-047	Unknown		False	Gill 20									Confirmed	C10[13]CH11N2[15]NO2S	SCNBimaneIS	250.05	1763956	1	1	N/A	Internal Standard	446407	1.8	1.8	0.00	M-H	250.05	1	-1.0445	True	N/A	N/A	N/A	Method	N/A	N/A			Pass	Pass	Pass	N/A	Pass	100	5 of 5	N/A	N/A
48	Processed	191107-048	Unknown		False	Liver 01									Identified	C11H11N3O2S	SCNBimane	248.05	745836	7.549	N/A	N/A	Target Compound	206239	1.8	1.81	0.01	M-H	248.049	7.549	-1.5106	True	0.404	1	1844443	Method	N/A	N/A		PPB	Pass	Pass	Fail	N/A	Pass	55.8012	3 of 5	N/A	N/A
48	Processed	191107-048	Unknown		False	Liver 01									Confirmed	C10[13]CH11N2[15]NO2S	SCNBimaneIS	250.05	1844443	1	1	N/A	Internal Standard	460193	1.8	1.81	0.01	M-H	250.05	1	-1.4106	True	N/A	N/A	N/A	Method	N/A	N/A			Pass	Pass	Pass	N/A	Pass	100	5 of 5	N/A	N/A
49	Processed	191107-049	Unknown		False	Liver 02									Confirmed	C11H11N3O2S	SCNBimane	248.05	635116	6.9	N/A	N/A	Target Compound	169041	1.8	1.8	0.00	M-H	248.05	6.9	-1.3876	True	0.367	1	1729905	Method	N/A	N/A		PPB	Pass	Pass	Pass	N/A	Pass	79.9599	4 of 6	N/A	N/A
49	Processed	191107-049	Unknown		False	Liver 02									Confirmed	C10[13]CH11N2[15]NO2S	SCNBimaneIS	250.05	1729905	1	1	N/A	Internal Standard	426988	1.8	1.8	0.00	M-H	250.05	1	-1.3496	True	N/A	N/A	N/A	Method	N/A	N/A			Pass	Pass	Pass	N/A	Pass	100	5 of 5	N/A	N/A
50	Processed	191107-050	Unknown		False	Liver 03									Confirmed	C11H11N3O2S	SCNBimane	248.05	315727	3.538	N/A	N/A	Target Compound	90364	1.8	1.8	0.00	M-H	248.049	3.538	-1.6337	True	0.174	1	1812814	Method	N/A	N/A		PPB	Pass	Pass	Pass	N/A	Pass	62.089	2 of 5	N/A	N/A
50	Processed	191107-050	Unknown		False	Liver 03									Confirmed	C10[13]CH11N2[15]NO2S	SCNBimaneIS	250.05	1812814	1	1	N/A	Internal Standard	451804	1.8	1.8	0.00	M-H	250.05	1	-1.5327	True	N/A	N/A	N/A	Method	N/A	N/A			Pass	Pass	Pass	N/A	Pass	100	5 of 5	N/A	N/A
51	Processed	191107-051	Unknown		False	Liver 04									Confirmed	C11H11N3O2S	SCNBimane	248.05	415400	4.773	N/A	N/A	Target Compound	112092	1.8	1.81	0.01	M-H	248.049	4.773	-1.6952	True	0.245	1	1695281	Method	N/A	N/A		PPB	Pass	Pass	Pass	N/A	Pass	62.6271	2 of 5	N/A	N/A
51	Processed	191107-051	Unknown		False	Liver 04									Confirmed	C10[13]CH11N2[15]NO2S	SCNBimaneIS	250.05	1695281	1	1	N/A	Internal Standard	418156	1.8	1.81	0.01	M-H	250.05	1	-1.6547	True	N/A	N/A	N/A	Method	N/A	N/A			Pass	Pass	Pass	N/A	Pass	100	5 of 5	N/A	N/A
52	Processed	191107-052	Unknown		False	Liver 05									Confirmed	C11H11N3O2S	SCNBimane	248.05	499886	5.976	N/A	N/A	Target Compound	135712	1.8	1.79	-0.01	M-H	248.049	5.976	-1.7567	True	0.314	1	1591641	Method	N/A	N/A		PPB	Pass	Pass	Pass	N/A	Pass	62.8334	2 of 5	N/A	N/A
52	Processed	191107-052	Unknown		False	Liver 05									Confirmed	C10[13]CH11N2[15]NO2S	SCNBimaneIS	250.05	1591641	1	1	N/A	Internal Standard	393833	1.8	1.8	0.00	M-H	250.05	1	-1.5937	True	N/A	N/A	N/A	Method	N/A	N/A			Pass	Pass	Pass	N/A	Pass	100	5 of 5	N/A	N/A
53	Processed	191107-053	Unknown		False	Liver 06									Confirmed	C11H11N3O2S	SCNBimane	248.05	1291295	12.757	N/A	N/A	Target Compound	352291	1.8	1.81	0.01	M-H	248.049	12.757	-1.6337	True	0.703	1	1836207	Method	N/A	N/A		PPB	Pass	Pass	Pass	N/A	Pass	60.4197	3 of 5	N/A	N/A
53	Processed	191107-053	Unknown		False	Liver 06									Confirmed	C10[13]CH11N2[15]NO2S	SCNBimaneIS	250.05	1836207	1	1	N/A	Internal Standard	456329	1.8	1.81	0.01	M-H	250.05	1	-1.3496	True	N/A	N/A	N/A	Method	N/A	N/A			Pass	Pass	Pass	N/A	Pass	100	5 of 5	N/A	N/A
54	Processed	191107-054	Unknown		False	Liver 07									Identified	C11H11N3O2S	SCNBimane	248.05	1266702	13.961	N/A	N/A	Target Compound	352471	1.8	1.81	0.01	M-H	248.049	13.961	-1.8797	True	0.772	1	1640117	Method	N/A	N/A		PPB	Pass	Pass	Fail	N/A	Pass	45.2963	3 of 5	N/A	N/A
54	Processed	191107-054	Unknown		False	Liver 07									Confirmed	C10[13]CH11N2[15]NO2S	SCNBimaneIS	250.05	1640117	1	1	N/A	Internal Standard	402676	1.8	1.81	0.01	M-H	250.05	1	-1.5327	True	N/A	N/A	N/A	Method	N/A	N/A			Pass	Pass	Pass	N/A	Pass	100	5 of 5	N/A	N/A
55	Processed	191107-055	Unknown		False	Liver 08									Identified	C11H11N3O2S	SCNBimane	248.05	798277	8.323	N/A	N/A	Target Compound	218279	1.8	1.81	0.01	M-H	248.049	8.323	-1.5106	True	0.449	1	1778845	Method	N/A	N/A		PPB	Pass	Pass	Fail	N/A	Pass	57.078	3 of 5	N/A	N/A
55	Processed	191107-055	Unknown		False	Liver 08									Confirmed	C10[13]CH11N2[15]NO2S	SCNBimaneIS	250.05	1778845	1	1	N/A	Internal Standard	441390	1.8	1.81	0.01	M-H	250.05	1	-1.4106	True	N/A	N/A	N/A	Method	N/A	N/A			Pass	Pass	Pass	N/A	Pass	100	5 of 5	N/A	N/A
56	Processed	191107-056	Unknown		False	Liver 09									Confirmed	C11H11N3O2S	SCNBimane	248.05	197927	2.268	N/A	N/A	Target Compound	53840	1.8	1.81	0.01	M-H	248.049	2.268	-1.7567	True	0.101	1	1954279	Method	N/A	N/A		PPB	Pass	Pass	Pass	N/A	Pass	63.0309	2 of 4	N/A	N/A
56	Processed	191107-056	Unknown		False	Liver 09									Confirmed	C10[13]CH11N2[15]NO2S	SCNBimaneIS	250.05	1954279	1	1	N/A	Internal Standard	478342	1.8	1.8	0.00	M-H	250.05	1	-1.5327	True	N/A	N/A	N/A	Method	N/A	N/A			Pass	Pass	Pass	N/A	Pass	100	5 of 5	N/A	N/A
57	Processed	191107-057	Unknown		False	Liver 10									Identified	C11H11N3O2S	SCNBimane	248.05	1642872	15.926	N/A	N/A	Target Compound	446721	1.8	1.8	0.00	M-H	248.049	15.926	-1.8797	True	0.885	1	1856146	Method	N/A	N/A		PPB	Pass	Pass	Fail	N/A	Pass	50.0134	3 of 5	N/A	N/A
57	Processed	191107-057	Unknown		False	Liver 10									Confirmed	C10[13]CH11N2[15]NO2S	SCNBimaneIS	250.05	1856146	1	1	N/A	Internal Standard	463530	1.8	1.8	0.00	M-H	250.05	1	-1.5937	True	N/A	N/A	N/A	Method	N/A	N/A			Pass	Pass	Pass	N/A	Pass	100	5 of 5	N/A	N/A
58	Processed	191107-058	Unknown		False	Liver 11									Confirmed	C11H11N3O2S	SCNBimane	248.05	263700	2.83	N/A	N/A	Target Compound	70942	1.8	1.8	0.00	M-H	248.05	2.83	-1.4491	True	0.134	1	1974368	Method	N/A	N/A		PPB	Pass	Pass	Pass	N/A	Pass	63.2125	2 of 4	N/A	N/A
58	Processed	191107-058	Unknown		False	Liver 11									Confirmed	C10[13]CH11N2[15]NO2S	SCNBimaneIS	250.05	1974368	1	1	N/A	Internal Standard	495349	1.8	1.8	0.00	M-H	250.05	1	-1.4716	True	N/A	N/A	N/A	Method	N/A	N/A			Pass	Pass	Pass	N/A	Pass	100	5 of 5	N/A	N/A
59	Processed	191107-059	Unknown		False	Liver 12									Confirmed	C11H11N3O2S	SCNBimane	248.05	844638	8.824	N/A	N/A	Target Compound	229249	1.8	1.8	0.00	M-H	248.05	8.824	-1.4491	True	0.478	1	1768747	Method	N/A	N/A		PPB	Pass	Pass	Pass	N/A	Pass	79.3674	3 of 5	N/A	N/A
59	Processed	191107-059	Unknown		False	Liver 12									Confirmed	C10[13]CH11N2[15]NO2S	SCNBimaneIS	250.05	1768747	1	1	N/A	Internal Standard	433530	1.8	1.8	0.00	M-H	250.05	1	-1.2886	True	N/A	N/A	N/A	Method	N/A	N/A			Pass	Pass	Pass	N/A	Pass	100	5 of 5	N/A	N/A
60	Processed	191107-060	Unknown		False	Liver 13									Confirmed	C11H11N3O2S	SCNBimane	248.05	2026635	19.296	N/A	N/A	Target Compound	559769	1.8	1.8	0.00	M-H	248.049	19.296	-1.6337	True	1.078	1	1879183	Method	N/A	N/A		PPB	Pass	Pass	Pass	N/A	Pass	60.4315	4 of 6	N/A	N/A
60	Processed	191107-060	Unknown		False	Liver 13									Confirmed	C10[13]CH11N2[15]NO2S	SCNBimaneIS	250.05	1879183	1	1	N/A	Internal Standard	469223	1.8	1.8	0.00	M-H	250.05	1	-1.2275	True	N/A	N/A	N/A	Method	N/A	N/A			Pass	Pass	Pass	N/A	Pass	100	5 of 5	N/A	N/A
61	Processed	191107-061	Unknown		False	Liver 14									Confirmed	C11H11N3O2S	SCNBimane	248.05	1365606	12.889	N/A	N/A	Target Compound	374938	1.8	1.8	0.00	M-H	248.05	12.889	-1.3876	True	0.711	1	1921238	Method	N/A	N/A		PPB	Pass	Pass	Pass	N/A	Pass	60.5548	3 of 5	N/A	N/A
61	Processed	191107-061	Unknown		False	Liver 14									Confirmed	C10[13]CH11N2[15]NO2S	SCNBimaneIS	250.05	1921238	1	1	N/A	Internal Standard	484582	1.8	1.8	0.00	M-H	250.05	1	-1.1055	True	N/A	N/A	N/A	Method	N/A	N/A			Pass	Pass	Pass	N/A	Pass	100	5 of 5	N/A	N/A
62	Processed	191107-062	Unknown		False	Liver 15									Identified	C11H11N3O2S	SCNBimane	248.05	1777228	18.497	N/A	N/A	Target Compound	473842	1.8	1.79	-0.01	M-H	248.05	18.497	-1.3876	True	1.033	1	1721097	Method	N/A	N/A		PPB	Pass	Pass	Fail	N/A	Pass	58.3021	3 of 5	N/A	N/A
62	Processed	191107-062	Unknown		False	Liver 15									Confirmed	C10[13]CH11N2[15]NO2S	SCNBimaneIS	250.05	1721097	1	1	N/A	Internal Standard	423906	1.8	1.8	0.00	M-H	250.05	1	-1.1055	True	N/A	N/A	N/A	Method	N/A	N/A			Pass	Pass	Pass	N/A	Pass	100	5 of 5	N/A	N/A
63	Processed	191107-063	Unknown		False	Liver 16									Confirmed	C11H11N3O2S	SCNBimane	248.05	3158231	31.088	N/A	N/A	Target Compound	856794	1.8	1.8	0.00	M-H	248.049	31.088	-1.5106	True	1.755	1	1799352	Method	N/A	N/A		PPB	Pass	Pass	Pass	N/A	Pass	77.5483	4 of 6	N/A	N/A
63	Processed	191107-063	Unknown		False	Liver 16									Confirmed	C10[13]CH11N2[15]NO2S	SCNBimaneIS	250.05	1799352	1	1	N/A	Internal Standard	443246	1.8	1.8	0.00	M-H	250.05	1	-0.9835	True	N/A	N/A	N/A	Method	N/A	N/A			Pass	Pass	Pass	N/A	Pass	100	5 of 5	N/A	N/A
64	Processed	191107-064	Unknown		False	Liver 17									Confirmed	C11H11N3O2S	SCNBimane	248.05	3044465	33.334	N/A	N/A	Target Compound	828807	1.8	1.8	0.00	M-H	248.049	33.334	-1.5106	True	1.884	1	1615883	Method	N/A	N/A		PPB	Pass	Pass	Pass	N/A	Pass	79.3261	4 of 6	N/A	N/A
64	Processed	191107-064	Unknown		False	Liver 17									Confirmed	C10[13]CH11N2[15]NO2S	SCNBimaneIS	250.05	1615883	1	1	N/A	Internal Standard	401194	1.8	1.8	0.00	M-H	250.05	1	-0.9835	True	N/A	N/A	N/A	Method	N/A	N/A			Pass	Pass	Pass	N/A	Pass	100	5 of 5	N/A	N/A
65	Processed	191107-065	Unknown		False	Liver 18									Confirmed	C11H11N3O2S	SCNBimane	248.05	4875935	45.037	N/A	N/A	Target Compound	1334958	1.8	1.8	0.00	M-H	248.049	45.037	-1.7567	True	2.556	1	1907875	Method	N/A	N/A		PPB	Pass	Pass	Pass	N/A	Pass	84.6087	5 of 8	N/A	N/A
65	Processed	191107-065	Unknown		False	Liver 18									Confirmed	C10[13]CH11N2[15]NO2S	SCNBimaneIS	250.05	1907875	1	1	N/A	Internal Standard	479366	1.8	1.8	0.00	M-H	250.05	1	-1.0445	True	N/A	N/A	N/A	Method	N/A	N/A			Pass	Pass	Pass	N/A	Pass	100	5 of 5	N/A	N/A
66	Processed	191107-066	Unknown		False	Liver 19									Identified	C11H11N3O2S	SCNBimane	248.05	975611	10.035	N/A	N/A	Target Compound	260949	1.8	1.8	0.00	M-H	248.049	10.035	-1.8797	True	0.547	1	1783465	Method	N/A	N/A		PPB	Pass	Pass	Fail	N/A	Pass	58.6097	3 of 5	N/A	N/A
66	Processed	191107-066	Unknown		False	Liver 19									Confirmed	C10[13]CH11N2[15]NO2S	SCNBimaneIS	250.05	1783465	1	1	N/A	Internal Standard	436176	1.8	1.8	0.00	M-H	250.05	1	-1.7157	True	N/A	N/A	N/A	Method	N/A	N/A			Pass	Pass	Pass	N/A	Pass	100	5 of 5	N/A	N/A
67	Processed	191107-067	Unknown		False	Liver 20									Confirmed	C11H11N3O2S	SCNBimane	248.05	3908341	37.964	N/A	N/A	Target Compound	1037251	1.8	1.8	0.00	M-H	248.049	37.964	-2.0643	True	2.15	1	1818024	Method	N/A	N/A		PPB	Pass	Pass	Pass	N/A	Pass	81.5337	4 of 7	N/A	N/A
67	Processed	191107-067	Unknown		False	Liver 20									Confirmed	C10[13]CH11N2[15]NO2S	SCNBimaneIS	250.05	1818024	1	1	N/A	Internal Standard	442939	1.8	1.8	0.00	M-H	250.05	1	-1.4106	True	N/A	N/A	N/A	Method	N/A	N/A			Pass	Pass	Pass	N/A	Pass	100	5 of 5	N/A	N/A
68	Processed	191107-068	Unknown		False	Tissue 01									Confirmed	C11H11N3O2S	SCNBimane	248.05	222355	2.489	N/A	N/A	Target Compound	62342	1.8	1.79	-0.01	M-H	248.049	2.489	-2.0028	True	0.114	1	1950446	Method	N/A	N/A		PPB	Pass	Pass	Pass	N/A	Pass	62.8364	3 of 5	N/A	N/A
68	Processed	191107-068	Unknown		False	Tissue 01									Confirmed	C10[13]CH11N2[15]NO2S	SCNBimaneIS	250.05	1950446	1	1	N/A	Internal Standard	480305	1.8	1.79	-0.01	M-H	250.05	1	-2.0208	True	N/A	N/A	N/A	Method	N/A	N/A			Pass	Pass	Pass	N/A	Pass	100	5 of 5	N/A	N/A
69	Processed	191107-069	Unknown		False	Tissue 02									Confirmed	C11H11N3O2S	SCNBimane	248.05	109649	1.398	N/A	N/A	Target Compound	29897	1.8	1.8	0.00	M-H	248.049	1.398	-1.5106	True	0.051	1	2133646	Method	N/A	N/A		PPB	Pass	Pass	Pass	N/A	Pass	65.8115	2 of 3	N/A	N/A
69	Processed	191107-069	Unknown		False	Tissue 02									Confirmed	C10[13]CH11N2[15]NO2S	SCNBimaneIS	250.05	2133646	1	1	N/A	Internal Standard	518055	1.8	1.8	0.00	M-H	250.05	1	-1.6547	True	N/A	N/A	N/A	Method	N/A	N/A			Pass	Pass	Pass	N/A	Pass	100	5 of 5	N/A	N/A
70	Processed	191107-070	Unknown		False	Tissue 03									Confirmed	C11H11N3O2S	SCNBimane	248.05	98814	1.359	N/A	N/A	Target Compound	27402	1.8	1.8	0.00	M-H	248.049	1.359	-1.6952	True	0.049	1	2011384	Method	N/A	N/A		PPB	Pass	Pass	Pass	N/A	Pass	65.6649	3 of 4	N/A	N/A
70	Processed	191107-070	Unknown		False	Tissue 03									Confirmed	C10[13]CH11N2[15]NO2S	SCNBimaneIS	250.05	2011384	1	1	N/A	Internal Standard	489695	1.8	1.8	0.00	M-H	250.05	1	-1.5937	True	N/A	N/A	N/A	Method	N/A	N/A			Pass	Pass	Pass	N/A	Pass	100	5 of 5	N/A	N/A
71	Processed	191107-071	Unknown		False	Tissue 04									Confirmed	C11H11N3O2S	SCNBimane	248.05	112907	1.506	N/A	N/A	Target Compound	30548	1.8	1.79	-0.01	M-H	248.049	1.506	-1.7567	True	0.058	1	1961554	Method	N/A	N/A		PPB	Pass	Pass	Pass	N/A	Pass	64.9883	2 of 3	N/A	N/A
71	Processed	191107-071	Unknown		False	Tissue 04									Confirmed	C10[13]CH11N2[15]NO2S	SCNBimaneIS	250.05	1961554	1	1	N/A	Internal Standard	477867	1.8	1.8	0.00	M-H	250.05	1	-2.0819	True	N/A	N/A	N/A	Method	N/A	N/A			Pass	Pass	Pass	N/A	Pass	100	5 of 5	N/A	N/A
72	Processed	191107-072	Unknown		False	Tissue 05									Confirmed	C11H11N3O2S	SCNBimane	248.05	111660	1.545	N/A	N/A	Target Compound	29654	1.8	1.8	0.00	M-H	248.049	1.545	-2.1258	True	0.06	1	1867103	Method	N/A	N/A		PPB	Pass	Pass	Pass	N/A	Pass	87.2008	2 of 3	N/A	N/A
72	Processed	191107-072	Unknown		False	Tissue 05									Confirmed	C10[13]CH11N2[15]NO2S	SCNBimaneIS	250.05	1867103	1	1	N/A	Internal Standard	453171	1.8	1.8	0.00	M-H	250.05	1	-2.0208	True	N/A	N/A	N/A	Method	N/A	N/A			Pass	Pass	Pass	N/A	Pass	100	5 of 5	N/A	N/A
73	Processed	191107-073	Unknown		False	Tissue 06									Identified	C11H11N3O2S	SCNBimane	248.05	340833	3.369	N/A	N/A	Target Compound	90453	1.8	1.79	-0.01	M-H	248.049	3.369	-1.7567	True	0.165	1	2071930	Method	N/A	N/A		PPB	Pass	Pass	Fail	N/A	Pass	35.2613	3 of 6	N/A	N/A
73	Processed	191107-073	Unknown		False	Tissue 06									Confirmed	C10[13]CH11N2[15]NO2S	SCNBimaneIS	250.05	2071930	1	1	N/A	Internal Standard	507673	1.8	1.8	0.00	M-H	250.05	1	-1.7768	True	N/A	N/A	N/A	Method	N/A	N/A			Pass	Pass	Pass	N/A	Pass	100	5 of 5	N/A	N/A
74	Processed	191107-074	Unknown		False	Tissue 07									Identified	C11H11N3O2S	SCNBimane	248.05	239714	2.434	N/A	N/A	Target Compound	63274	1.8	1.8	0.00	M-H	248.049	2.434	-1.5721	True	0.111	1	2163367	Method	N/A	N/A		PPB	Pass	Pass	Fail	N/A	Pass	20.3673	2 of 4	N/A	N/A
74	Processed	191107-074	Unknown		False	Tissue 07									Confirmed	C10[13]CH11N2[15]NO2S	SCNBimaneIS	250.05	2163367	1	1	N/A	Internal Standard	529673	1.8	1.8	0.00	M-H	250.05	1	-1.5327	True	N/A	N/A	N/A	Method	N/A	N/A			Pass	Pass	Pass	N/A	Pass	100	5 of 5	N/A	N/A
75	Processed	191107-075	Unknown		False	Tissue 08									Identified	C11H11N3O2S	SCNBimane	248.05	192594	2.07	N/A	N/A	Target Compound	51089	1.8	1.8	0.00	M-H	248.049	2.07	-1.6952	True	0.09	1	2141483	Method	N/A	N/A		PPB	Pass	Pass	Fail	N/A	Pass	10.2759	2 of 4	N/A	N/A
75	Processed	191107-075	Unknown		False	Tissue 08									Confirmed	C10[13]CH11N2[15]NO2S	SCNBimaneIS	250.05	2141483	1	1	N/A	Internal Standard	516213	1.8	1.8	0.00	M-H	250.05	1	-1.5937	True	N/A	N/A	N/A	Method	N/A	N/A			Pass	Pass	Pass	N/A	Pass	100	5 of 5	N/A	N/A
76	Processed	191107-076	Unknown		False	Tissue 09									Confirmed	C11H11N3O2S	SCNBimane	248.05	112533	1.402	N/A	N/A	Target Compound	30567	1.8	1.79	-0.01	M-H	248.049	1.402	-1.5106	True	0.052	1	2180628	Method	N/A	N/A		PPB	Pass	Pass	Pass	N/A	Pass	66.1998	3 of 4	N/A	N/A
76	Processed	191107-076	Unknown		False	Tissue 09									Confirmed	C10[13]CH11N2[15]NO2S	SCNBimaneIS	250.05	2180628	1	1	N/A	Internal Standard	533069	1.8	1.79	-0.01	M-H	250.05	1	-1.6547	True	N/A	N/A	N/A	Method	N/A	N/A			Pass	Pass	Pass	N/A	Pass	100	5 of 5	N/A	N/A
77	Processed	191107-077	Unknown		False	Tissue 10									Confirmed	C11H11N3O2S	SCNBimane	248.05	230139	2.478	N/A	N/A	Target Compound	59218	1.8	1.79	-0.01	M-H	248.049	2.478	-1.7567	True	0.113	1	2030474	Method	N/A	N/A		PPB	Pass	Pass	Pass	N/A	Pass	62.8024	2 of 4	N/A	N/A
77	Processed	191107-077	Unknown		False	Tissue 10									Confirmed	C10[13]CH11N2[15]NO2S	SCNBimaneIS	250.05	2030474	1	1	N/A	Internal Standard	492008	1.8	1.79	-0.01	M-H	250.05	1	-1.7157	True	N/A	N/A	N/A	Method	N/A	N/A			Pass	Pass	Pass	N/A	Pass	100	5 of 5	N/A	N/A
78	Processed	191107-078	Unknown		False	Tissue 11									Confirmed	C11H11N3O2S	SCNBimane	248.05	125895	1.553	N/A	N/A	Target Compound	35017	1.8	1.79	-0.01	M-H	248.049	1.553	-1.8797	True	0.06	1	2089095	Method	N/A	N/A		PPB	Pass	Pass	Pass	N/A	Pass	65.6282	2 of 3	N/A	N/A
78	Processed	191107-078	Unknown		False	Tissue 11									Confirmed	C10[13]CH11N2[15]NO2S	SCNBimaneIS	250.05	2089095	1	1	N/A	Internal Standard	505273	1.8	1.79	-0.01	M-H	250.05	1	-1.7768	True	N/A	N/A	N/A	Method	N/A	N/A			Pass	Pass	Pass	N/A	Pass	100	5 of 5	N/A	N/A
79	Processed	191107-079	Unknown		False	Tissue 12									Confirmed	C11H11N3O2S	SCNBimane	248.05	186247	2.006	N/A	N/A	Target Compound	48087	1.8	1.79	-0.01	M-H	248.049	2.006	-1.8797	True	0.086	1	2159162	Method	N/A	N/A		PPB	Pass	Pass	Pass	N/A	Pass	62.6009	2 of 4	N/A	N/A
79	Processed	191107-079	Unknown		False	Tissue 12									Confirmed	C10[13]CH11N2[15]NO2S	SCNBimaneIS	250.05	2159162	1	1	N/A	Internal Standard	529723	1.8	1.79	-0.01	M-H	250.05	1	-1.7768	True	N/A	N/A	N/A	Method	N/A	N/A			Pass	Pass	Pass	N/A	Pass	100	5 of 5	N/A	N/A
80	Processed	191107-080	Unknown		False	Tissue 13									Identified	C11H11N3O2S	SCNBimane	248.05	151030	2.576	N/A	N/A	Target Compound	44306	1.8	1.8	0.00	M-H	248.049	2.576	-2.0643	True	0.119	1	1269071	Method	N/A	N/A		PPB	Pass	Pass	Fail	N/A	Pass	32.3077	2 of 3	N/A	N/A
80	Processed	191107-080	Unknown		False	Tissue 13									Confirmed	C10[13]CH11N2[15]NO2S	SCNBimaneIS	250.05	1269071	1	1	N/A	Internal Standard	338294	1.8	1.8	0.00	M-H	250.05	1	-1.7768	True	N/A	N/A	N/A	Method	N/A	N/A			Pass	Pass	Pass	N/A	Pass	94.8852	4 of 5	N/A	N/A
81	Processed	191107-081	Unknown		False	Tissue 14									Confirmed	C11H11N3O2S	SCNBimane	248.05	546949	4.718	N/A	N/A	Target Compound	143553	1.8	1.8	0.00	M-H	248.049	4.718	-1.7567	True	0.242	1	2261013	Method	N/A	N/A		PPB	Pass	Pass	Pass	N/A	Pass	62.4798	2 of 5	N/A	N/A
81	Processed	191107-081	Unknown		False	Tissue 14									Confirmed	C10[13]CH11N2[15]NO2S	SCNBimaneIS	250.05	2261013	1	1	N/A	Internal Standard	553847	1.8	1.8	0.00	M-H	250.05	1	-1.7157	True	N/A	N/A	N/A	Method	N/A	N/A			Pass	Pass	Pass	N/A	Pass	100	5 of 5	N/A	N/A
82	Processed	191107-082	Unknown		False	Tissue 15									Identified	C11H11N3O2S	SCNBimane	248.05	232620	2.419	N/A	N/A	Target Compound	63343	1.8	1.79	-0.01	M-H	248.049	2.419	-1.5721	True	0.11	1	2115213	Method	N/A	N/A		PPB	Pass	Pass	Fail	N/A	Pass	50.6357	2 of 4	N/A	N/A
82	Processed	191107-082	Unknown		False	Tissue 15									Confirmed	C10[13]CH11N2[15]NO2S	SCNBimaneIS	250.05	2115213	1	1	N/A	Internal Standard	522843	1.8	1.79	-0.01	M-H	250.05	1	-1.5327	True	N/A	N/A	N/A	Method	N/A	N/A			Pass	Pass	Pass	N/A	Pass	100	5 of 5	N/A	N/A
83	Processed	191107-083	Unknown		False	Tissue 16									Confirmed	C11H11N3O2S	SCNBimane	248.05	576938	5.368	N/A	N/A	Target Compound	159800	1.8	1.8	0.00	M-H	248.049	5.368	-1.7567	True	0.279	1	2066417	Method	N/A	N/A		PPB	Pass	Pass	Pass	N/A	Pass	62.6358	2 of 5	N/A	N/A
83	Processed	191107-083	Unknown		False	Tissue 16									Confirmed	C10[13]CH11N2[15]NO2S	SCNBimaneIS	250.05	2066417	1	1	N/A	Internal Standard	509483	1.8	1.8	0.00	M-H	250.05	1	-1.7157	True	N/A	N/A	N/A	Method	N/A	N/A			Pass	Pass	Pass	N/A	Pass	100	5 of 5	N/A	N/A
84	Processed	191107-084	Unknown		False	Tissue 17									Confirmed	C11H11N3O2S	SCNBimane	248.05	640701	5.804	N/A	N/A	Target Compound	173424	1.8	1.79	-0.01	M-H	248.049	5.804	-1.8797	True	0.304	1	2106063	Method	N/A	N/A		PPB	Pass	Pass	Pass	N/A	Pass	62.7534	2 of 5	N/A	N/A
84	Processed	191107-084	Unknown		False	Tissue 17									Confirmed	C10[13]CH11N2[15]NO2S	SCNBimaneIS	250.05	2106063	1	1	N/A	Internal Standard	515411	1.8	1.79	-0.01	M-H	250.05	1	-1.7768	True	N/A	N/A	N/A	Method	N/A	N/A			Pass	Pass	Pass	N/A	Pass	100	5 of 5	N/A	N/A
85	Processed	191107-085	Unknown		False	Tissue 18									Confirmed	C11H11N3O2S	SCNBimane	248.05	1546876	13.205	N/A	N/A	Target Compound	415465	1.8	1.79	-0.01	M-H	248.049	13.205	-1.5721	True	0.729	1	2121997	Method	N/A	N/A		PPB	Pass	Pass	Pass	N/A	Pass	60.8385	3 of 5	N/A	N/A
85	Processed	191107-085	Unknown		False	Tissue 18									Confirmed	C10[13]CH11N2[15]NO2S	SCNBimaneIS	250.05	2121997	1	1	N/A	Internal Standard	519646	1.8	1.79	-0.01	M-H	250.05	1	-1.4106	True	N/A	N/A	N/A	Method	N/A	N/A			Pass	Pass	Pass	N/A	Pass	100	5 of 5	N/A	N/A
86	Processed	191107-086	Unknown		False	Tissue 19									Confirmed	C11H11N3O2S	SCNBimane	248.05	301945	3.009	N/A	N/A	Target Compound	82089	1.8	1.8	0.00	M-H	248.049	3.009	-1.9412	True	0.144	1	2099552	Method	N/A	N/A		PPB	Pass	Pass	Pass	N/A	Pass	63.0878	2 of 4	N/A	N/A
86	Processed	191107-086	Unknown		False	Tissue 19									Confirmed	C10[13]CH11N2[15]NO2S	SCNBimaneIS	250.05	2099552	1	1	N/A	Internal Standard	524599	1.8	1.8	0.00	M-H	250.05	1	-1.8988	True	N/A	N/A	N/A	Method	N/A	N/A			Pass	Pass	Pass	N/A	Pass	100	5 of 5	N/A	N/A
87	Processed	191107-087	Unknown		False	Tissue 20									Confirmed	C11H11N3O2S	SCNBimane	248.05	1373381	12.188	N/A	N/A	Target Compound	370240	1.8	1.79	-0.01	M-H	248.049	12.188	-1.6952	True	0.671	1	2047999	Method	N/A	N/A		PPB	Pass	Pass	Pass	N/A	Pass	60.0529	3 of 5	N/A	N/A
87	Processed	191107-087	Unknown		False	Tissue 20									Confirmed	C10[13]CH11N2[15]NO2S	SCNBimaneIS	250.05	2047999	1	1	N/A	Internal Standard	512063	1.8	1.79	-0.01	M-H	250.05	1	-1.5327	True	N/A	N/A	N/A	Method	N/A	N/A			Pass	Pass	Pass	N/A	Pass	100	5 of 5	N/A	N/A
88	Processed	191107-088	Unknown		False	Plasma 372									Confirmed	C11H11N3O2S	SCNBimane	248.05	311545	2.48	N/A	N/A	Target Compound	84845	1.8	1.79	-0.01	M-H	248.049	2.48	-1.5721	True	0.113	1	2746040	Method	N/A	N/A		PPB	Pass	Pass	Pass	N/A	Pass	60.6491	3 of 6	N/A	N/A
88	Processed	191107-088	Unknown		False	Plasma 372									Confirmed	C10[13]CH11N2[15]NO2S	SCNBimaneIS	250.05	2746040	1	1	N/A	Internal Standard	676553	1.8	1.79	-0.01	M-H	250.05	1	-1.5327	True	N/A	N/A	N/A	Method	N/A	N/A			Pass	Pass	Pass	N/A	Pass	100	5 of 6	N/A	N/A
89	Processed	191107-089	Unknown		False	Plasma 373									Confirmed	C11H11N3O2S	SCNBimane	248.05	3472287	24.032	N/A	N/A	Target Compound	931809	1.8	1.8	0.00	M-H	248.049	24.032	-1.8182	True	1.35	1	2571506	Method	N/A	N/A		PPB	Pass	Pass	Pass	N/A	Pass	68.9696	4 of 7	N/A	N/A
89	Processed	191107-089	Unknown		False	Plasma 373									Confirmed	C10[13]CH11N2[15]NO2S	SCNBimaneIS	250.05	2571506	1	1	N/A	Internal Standard	629821	1.8	1.8	0.00	M-H	250.05	1	-1.3496	True	N/A	N/A	N/A	Method	N/A	N/A			Pass	Pass	Pass	N/A	Pass	100	5 of 5	N/A	N/A
90	Processed	191107-090	Unknown		False	Plasma 374									Identified	C11H11N3O2S	SCNBimane	248.05	904045	6.551	N/A	N/A	Target Compound	244507	1.8	1.8	0.00	M-H	248.049	6.551	-1.8182	True	0.347	1	2604629	Method	N/A	N/A		PPB	Pass	Pass	Fail	N/A	Pass	53.5526	3 of 5	N/A	N/A
90	Processed	191107-090	Unknown		False	Plasma 374									Confirmed	C10[13]CH11N2[15]NO2S	SCNBimaneIS	250.05	2604629	1	1	N/A	Internal Standard	633537	1.8	1.8	0.00	M-H	250.05	1	-1.6547	True	N/A	N/A	N/A	Method	N/A	N/A			Pass	Pass	Pass	N/A	Pass	100	5 of 5	N/A	N/A
91	Processed	191107-091	Unknown		False	Plasma 375									Identified	C11H11N3O2S	SCNBimane	248.05	729499	5.336	N/A	N/A	Target Compound	200619	1.8	1.8	0.00	M-H	248.049	5.336	-1.8797	True	0.277	1	2630233	Method	N/A	N/A		PPB	Pass	Pass	Fail	N/A	Pass	49.4034	2 of 5	N/A	N/A
91	Processed	191107-091	Unknown		False	Plasma 375									Confirmed	C10[13]CH11N2[15]NO2S	SCNBimaneIS	250.05	2630233	1	1	N/A	Internal Standard	659976	1.8	1.8	0.00	M-H	250.05	1	-1.8378	True	N/A	N/A	N/A	Method	N/A	N/A			Pass	Pass	Pass	N/A	Pass	100	5 of 5	N/A	N/A
92	Processed	191107-092	Unknown		False	Plasma 397									Confirmed	C11H11N3O2S	SCNBimane	248.05	176444	1.642	N/A	N/A	Target Compound	49835	1.8	1.8	0.00	M-H	248.049	1.642	-1.7567	True	0.065	1	2697733	Method	N/A	N/A		PPB	Pass	Pass	Pass	N/A	Pass	66.2871	2 of 3	N/A	N/A
92	Processed	191107-092	Unknown		False	Plasma 397									Confirmed	C10[13]CH11N2[15]NO2S	SCNBimaneIS	250.05	2697733	1	1	N/A	Internal Standard	678319	1.8	1.8	0.00	M-H	250.05	1	-1.7768	True	N/A	N/A	N/A	Method	N/A	N/A			Pass	Pass	Pass	N/A	Pass	100	5 of 5	N/A	N/A
93	Processed	191107-093	Unknown		False	Plasma 398									Confirmed	C11H11N3O2S	SCNBimane	248.05	86638	1.025	N/A	N/A	Target Compound	24627	1.8	1.8	0.00	M-H	248.049	1.025	-1.5721	True	0.03	1	2889435	Method	N/A	N/A		PPB	Pass	Pass	Pass	N/A	Pass	64.7807	2 of 3	N/A	N/A
93	Processed	191107-093	Unknown		False	Plasma 398									Confirmed	C10[13]CH11N2[15]NO2S	SCNBimaneIS	250.05	2889435	1	1	N/A	Internal Standard	729978	1.8	1.8	0.00	M-H	250.05	1	-1.5937	True	N/A	N/A	N/A	Method	N/A	N/A			Pass	Pass	Pass	N/A	Pass	100	5 of 6	N/A	N/A
94	Processed	191107-094	Unknown		False	Plasma 399									Confirmed	C11H11N3O2S	SCNBimane	248.05	119385	1.25	N/A	N/A	Target Compound	32669	1.8	1.8	0.00	M-H	248.049	1.25	-1.8797	True	0.043	1	2784969	Method	N/A	N/A		PPB	Pass	Pass	Pass	N/A	Pass	65.7352	2 of 3	N/A	N/A
94	Processed	191107-094	Unknown		False	Plasma 399									Confirmed	C10[13]CH11N2[15]NO2S	SCNBimaneIS	250.05	2784969	1	1	N/A	Internal Standard	686800	1.8	1.8	0.00	M-H	250.05	1	-1.6547	True	N/A	N/A	N/A	Method	N/A	N/A			Pass	Pass	Pass	N/A	Pass	100	5 of 6	N/A	N/A
95	Processed	191107-095	Unknown		False	Plasma 400									Confirmed	C11H11N3O2S	SCNBimane	248.05	390675	2.896	N/A	N/A	Target Compound	109604	1.8	1.79	-0.01	M-H	248.049	2.896	-1.5106	True	0.137	1	2844535	Method	N/A	N/A		PPB	Pass	Pass	Pass	N/A	Pass	61.2848	2 of 5	N/A	N/A
95	Processed	191107-095	Unknown		False	Plasma 400									Confirmed	C10[13]CH11N2[15]NO2S	SCNBimaneIS	250.05	2844535	1	1	N/A	Internal Standard	711831	1.8	1.79	-0.01	M-H	250.05	1	-1.5327	True	N/A	N/A	N/A	Method	N/A	N/A			Pass	Pass	Pass	N/A	Pass	100	5 of 5	N/A	N/A
96	Processed	191107-096	Unknown		False	Plasma 401									Identified	C11H11N3O2S	SCNBimane	248.05	334731	2.632	N/A	N/A	Target Compound	94592	1.8	1.79	-0.01	M-H	248.049	2.632	-1.5106	True	0.122	1	2738964	Method	N/A	N/A		PPB	Pass	Pass	Fail	N/A	Pass	24.269	2 of 5	N/A	N/A
96	Processed	191107-096	Unknown		False	Plasma 401									Confirmed	C10[13]CH11N2[15]NO2S	SCNBimaneIS	250.05	2738964	1	1	N/A	Internal Standard	674790	1.8	1.79	-0.01	M-H	250.05	1	-1.5327	True	N/A	N/A	N/A	Method	N/A	N/A			Pass	Pass	Pass	N/A	Pass	100	5 of 5	N/A	N/A
97	Processed	191107-097	Unknown		False	Plasma 402									Confirmed	C11H11N3O2S	SCNBimane	248.05	72995	0.893	N/A	N/A	Target Compound	19563	1.8	1.79	-0.01	M-H	248.05	0.893	-1.3261	True	0.022	1	3263012	Method	N/A	N/A		PPB	Pass	Pass	Pass	N/A	Pass	83.2117	2 of 3	N/A	N/A
97	Processed	191107-097	Unknown		False	Plasma 402									Confirmed	C10[13]CH11N2[15]NO2S	SCNBimaneIS	250.05	3263012	1	1	N/A	Internal Standard	788952	1.8	1.8	0.00	M-H	250.05	1	-1.5937	True	N/A	N/A	N/A	Method	N/A	N/A			Pass	Pass	Pass	N/A	Pass	100	5 of 6	N/A	N/A
98	Processed	191107-098	Unknown		False	Plasma 403									Confirmed	C11H11N3O2S	SCNBimane	248.05	1001302	5.788	N/A	N/A	Target Compound	279541	1.8	1.8	0.00	M-H	248.049	5.788	-1.7567	True	0.303	1	3301180	Method	N/A	N/A		PPB	Pass	Pass	Pass	N/A	Pass	62.7251	2 of 5	N/A	N/A
98	Processed	191107-098	Unknown		False	Plasma 403									Confirmed	C10[13]CH11N2[15]NO2S	SCNBimaneIS	250.05	3301180	1	1	N/A	Internal Standard	814204	1.8	1.8	0.00	M-H	250.05	1	-1.6547	True	N/A	N/A	N/A	Method	N/A	N/A			Pass	Pass	Pass	N/A	Pass	100	5 of 6	N/A	N/A
99	Processed	191107-099	Unknown		False	Plasma 404									Identified	C11H11N3O2S	SCNBimane	248.05	1770536	10.072	N/A	N/A	Target Compound	474162	1.8	1.8	0.00	M-H	248.049	10.072	-2.0028	True	0.549	1	3224245	Method	N/A	N/A		PPB	Pass	Pass	Fail	N/A	Pass	58.6768	3 of 5	N/A	N/A
99	Processed	191107-099	Unknown		False	Plasma 404									Confirmed	C10[13]CH11N2[15]NO2S	SCNBimaneIS	250.05	3224245	1	1	N/A	Internal Standard	781630	1.8	1.8	0.00	M-H	250.05	1	-1.7768	True	N/A	N/A	N/A	Method	N/A	N/A			Pass	Pass	Pass	N/A	Pass	100	5 of 6	N/A	N/A
100	Processed	191107-100	Unknown		False	Plasma 405									Confirmed	C11H11N3O2S	SCNBimane	248.05	5100202	27.781	N/A	N/A	Target Compound	1374710	1.8	1.79	-0.01	M-H	248.049	27.781	-2.0643	True	1.565	1	3258055	Method	N/A	N/A		PPB	Pass	Pass	Pass	N/A	Pass	73.8813	5 of 8	N/A	N/A
100	Processed	191107-100	Unknown		False	Plasma 405									Confirmed	C10[13]CH11N2[15]NO2S	SCNBimaneIS	250.05	3258055	1	1	N/A	Internal Standard	805286	1.8	1.79	-0.01	M-H	250.05	1	-1.5937	True	N/A	N/A	N/A	Method	N/A	N/A			Pass	Pass	Pass	N/A	Pass	100	5 of 6	N/A	N/A
101	Processed	191107-101	Unknown		False	Plasma 406									Confirmed	C11H11N3O2S	SCNBimane	248.05	8842744	47.585	N/A	N/A	Target Compound	2404808	1.8	1.79	-0.01	M-H	248.049	47.585	-1.6337	True	2.702	1	3272766	Method	N/A	N/A		PPB	Pass	Pass	Pass	N/A	Pass	85.8994	6 of 9	N/A	N/A
101	Processed	191107-101	Unknown		False	Plasma 406									Confirmed	C10[13]CH11N2[15]NO2S	SCNBimaneIS	250.05	3272766	1	1	N/A	Internal Standard	811058	1.8	1.79	-0.01	M-H	250.05	1	-0.8004	True	N/A	N/A	N/A	Method	N/A	N/A			Pass	Pass	Pass	N/A	Pass	100	5 of 6	N/A	N/A
102	Processed	191107-102	Unknown		False	Plasma 407									Confirmed	C11H11N3O2S	SCNBimane	248.05	18904369	112.472	N/A	N/A	Target Compound	5061407	1.8	1.79	-0.01	M-H	248.049	112.472	-1.9412	True	6.426	1	2942040	Method	N/A	N/A		PPB	Pass	Pass	Pass	N/A	Pass	92.3751	7 of 9	N/A	N/A
102	Processed	191107-102	Unknown		False	Plasma 407									Confirmed	C10[13]CH11N2[15]NO2S	SCNBimaneIS	250.05	2942040	1	1	N/A	Internal Standard	722159	1.8	1.79	-0.01	M-H	250.05	1	-0.3122	True	N/A	N/A	N/A	Method	N/A	N/A			Pass	Pass	Pass	N/A	Pass	100	5 of 5	N/A	N/A
103	Processed	191107-103	Unknown		False	Plasma 408									Confirmed	C11H11N3O2S	SCNBimane	248.05	60810843	404.836	N/A	N/A	Target Compound	16222156	1.8	1.8	0.00	M-H	248.049	404.836	-2.1873	True	23.203	1	2620770	Method	N/A	N/A		PPB	Pass	Pass	Pass	N/A	Pass	100	9 of 9	N/A	N/A
103	Processed	191107-103	Unknown		False	Plasma 408									Confirmed	C10[13]CH11N2[15]NO2S	SCNBimaneIS	250.05	2620770	1	1	N/A	Internal Standard	651540	1.8	1.8	0.00	M-H	250.05	1	-1.7768	True	N/A	N/A	N/A	Method	N/A	N/A			Pass	Pass	Pass	N/A	Pass	100	5 of 5	N/A	N/A
104	Processed	191107-104	Unknown		False	Plasma 409									Confirmed	C11H11N3O2S	SCNBimane	248.05	4340391	23.124	N/A	N/A	Target Compound	1184321	1.8	1.8	0.00	M-H	248.049	23.124	-1.8182	True	1.298	1	3343456	Method	N/A	N/A		PPB	Pass	Pass	Pass	N/A	Pass	67.4203	4 of 7	N/A	N/A
104	Processed	191107-104	Unknown		False	Plasma 409									Confirmed	C10[13]CH11N2[15]NO2S	SCNBimaneIS	250.05	3343456	1	1	N/A	Internal Standard	827413	1.8	1.8	0.00	M-H	250.05	1	-1.4716	True	N/A	N/A	N/A	Method	N/A	N/A			Pass	Pass	Pass	N/A	Pass	100	5 of 5	N/A	N/A
105	Processed	191107-105	Unknown		False	Gill 397									Confirmed	C11H11N3O2S	SCNBimane	248.05	139049	1.21	N/A	N/A	Target Compound	38846	1.8	1.8	0.00	M-H	248.05	1.21	-1.3876	True	0.041	1	3425873	Method	N/A	N/A		PPB	Pass	Pass	Pass	N/A	Pass	64.9511	2 of 3	N/A	N/A
105	Processed	191107-105	Unknown		False	Gill 397									Confirmed	C10[13]CH11N2[15]NO2S	SCNBimaneIS	250.05	3425873	1	1	N/A	Internal Standard	836532	1.8	1.79	-0.01	M-H	250.05	1	-1.8378	True	N/A	N/A	N/A	Method	N/A	N/A			Pass	Pass	Pass	N/A	Pass	100	5 of 6	N/A	N/A
106	Processed	191107-106	Unknown		False	Gill 398									Identified	C11H11N3O2S	SCNBimane	248.05	306292	2.11	N/A	N/A	Target Compound	83894	1.8	1.8	0.00	M-H	248.049	2.11	-1.6952	True	0.092	1	3320300	Method	N/A	N/A		PPB	Pass	Pass	Fail	N/A	Pass	59.2124	2 of 5	N/A	N/A
106	Processed	191107-106	Unknown		False	Gill 398									Confirmed	C10[13]CH11N2[15]NO2S	SCNBimaneIS	250.05	3320300	1	1	N/A	Internal Standard	811183	1.8	1.8	0.00	M-H	250.05	1	-1.5937	True	N/A	N/A	N/A	Method	N/A	N/A			Pass	Pass	Pass	N/A	Pass	100	6 of 6	N/A	N/A
107	Processed	191107-107	Unknown		False	Gill 399									Confirmed	C11H11N3O2S	SCNBimane	248.05	258626	1.86	N/A	N/A	Target Compound	69713	1.8	1.79	-0.01	M-H	248.049	1.86	-1.5106	True	0.078	1	3320769	Method	N/A	N/A		PPB	Pass	Pass	Pass	N/A	Pass	62.9172	2 of 4	N/A	N/A
107	Processed	191107-107	Unknown		False	Gill 399									Confirmed	C10[13]CH11N2[15]NO2S	SCNBimaneIS	250.05	3320769	1	1	N/A	Internal Standard	799365	1.8	1.79	-0.01	M-H	250.05	1	-1.5937	True	N/A	N/A	N/A	Method	N/A	N/A			Pass	Pass	Pass	N/A	Pass	100	5 of 6	N/A	N/A
108	Processed	191107-108	Unknown		False	Gill 400									Confirmed	C11H11N3O2S	SCNBimane	248.05	206428	1.611	N/A	N/A	Target Compound	56408	1.8	1.8	0.00	M-H	248.05	1.611	-1.3261	True	0.064	1	3246721	Method	N/A	N/A		PPB	Pass	Pass	Pass	N/A	Pass	62.6269	3 of 5	N/A	N/A
108	Processed	191107-108	Unknown		False	Gill 400									Confirmed	C10[13]CH11N2[15]NO2S	SCNBimaneIS	250.05	3246721	1	1	N/A	Internal Standard	784852	1.8	1.79	-0.01	M-H	250.05	1	-1.5937	True	N/A	N/A	N/A	Method	N/A	N/A			Pass	Pass	Pass	N/A	Pass	100	5 of 6	N/A	N/A
109	Processed	191107-109	Unknown		False	Gill 401									Confirmed	C11H11N3O2S	SCNBimane	248.05	977925	5.75	N/A	N/A	Target Compound	267034	1.8	1.79	-0.01	M-H	248.049	5.75	-1.6337	True	0.301	1	3247706	Method	N/A	N/A		PPB	Pass	Pass	Pass	N/A	Pass	62.73	2 of 5	N/A	N/A
109	Processed	191107-109	Unknown		False	Gill 401									Confirmed	C10[13]CH11N2[15]NO2S	SCNBimaneIS	250.05	3247706	1	1	N/A	Internal Standard	802024	1.8	1.79	-0.01	M-H	250.05	1	-1.5327	True	N/A	N/A	N/A	Method	N/A	N/A			Pass	Pass	Pass	N/A	Pass	100	6 of 6	N/A	N/A
110	Processed	191107-110	Unknown		False	Gill 402									Confirmed	C11H11N3O2S	SCNBimane	248.05	652069	3.869	N/A	N/A	Target Compound	177583	1.8	1.79	-0.01	M-H	248.049	3.869	-1.5106	True	0.193	1	3375058	Method	N/A	N/A		PPB	Pass	Pass	Pass	N/A	Pass	62.0855	2 of 5	N/A	N/A
110	Processed	191107-110	Unknown		False	Gill 402									Confirmed	C10[13]CH11N2[15]NO2S	SCNBimaneIS	250.05	3375058	1	1	N/A	Internal Standard	830120	1.8	1.79	-0.01	M-H	250.05	1	-1.5327	True	N/A	N/A	N/A	Method	N/A	N/A			Pass	Pass	Pass	N/A	Pass	100	5 of 6	N/A	N/A
111	Processed	191107-111	Unknown		False	Gill 403									Confirmed	C11H11N3O2S	SCNBimane	248.05	809648	4.559	N/A	N/A	Target Compound	219867	1.8	1.8	0.00	M-H	248.049	4.559	-1.7567	True	0.233	1	3477825	Method	N/A	N/A		PPB	Pass	Pass	Pass	N/A	Pass	62.4575	2 of 5	N/A	N/A
111	Processed	191107-111	Unknown		False	Gill 403									Confirmed	C10[13]CH11N2[15]NO2S	SCNBimaneIS	250.05	3477825	1	1	N/A	Internal Standard	858468	1.8	1.8	0.00	M-H	250.05	1	-1.5937	True	N/A	N/A	N/A	Method	N/A	N/A			Pass	Pass	Pass	N/A	Pass	100	5 of 6	N/A	N/A
112	Processed	191107-112	Unknown		False	Gill 404									Identified	C11H11N3O2S	SCNBimane	248.05	285601	1.903	N/A	N/A	Target Compound	76574	1.8	1.79	-0.01	M-H	248.049	1.903	-1.5106	True	0.08	1	3553620	Method	N/A	N/A		PPB	Pass	Pass	Fail	N/A	Pass	5.89519	3 of 5	N/A	N/A
112	Processed	191107-112	Unknown		False	Gill 404									Confirmed	C10[13]CH11N2[15]NO2S	SCNBimaneIS	250.05	3553620	1	1	N/A	Internal Standard	869973	1.8	1.79	-0.01	M-H	250.05	1	-1.6547	True	N/A	N/A	N/A	Method	N/A	N/A			Pass	Pass	Pass	N/A	Pass	100	5 of 6	N/A	N/A
113	Processed	191107-113	Unknown		False	Gill 405									Confirmed	C11H11N3O2S	SCNBimane	248.05	665280	3.778	N/A	N/A	Target Compound	180269	1.8	1.79	-0.01	M-H	248.049	3.778	-1.6952	True	0.188	1	3539796	Method	N/A	N/A		PPB	Pass	Pass	Pass	N/A	Pass	62.0804	2 of 5	N/A	N/A
113	Processed	191107-113	Unknown		False	Gill 405									Confirmed	C10[13]CH11N2[15]NO2S	SCNBimaneIS	250.05	3539796	1	1	N/A	Internal Standard	867847	1.8	1.79	-0.01	M-H	250.05	1	-1.5937	True	N/A	N/A	N/A	Method	N/A	N/A			Pass	Pass	Pass	N/A	Pass	100	5 of 6	N/A	N/A
114	Processed	191107-114	Unknown		False	Gill 406									Confirmed	C11H11N3O2S	SCNBimane	248.05	256970	1.757	N/A	N/A	Target Compound	72156	1.8	1.79	-0.01	M-H	248.049	1.757	-1.5721	True	0.072	1	3570972	Method	N/A	N/A		PPB	Pass	Pass	Pass	N/A	Pass	62.8075	2 of 4	N/A	N/A
114	Processed	191107-114	Unknown		False	Gill 406									Confirmed	C10[13]CH11N2[15]NO2S	SCNBimaneIS	250.05	3570972	1	1	N/A	Internal Standard	878509	1.8	1.79	-0.01	M-H	250.05	1	-1.5937	True	N/A	N/A	N/A	Method	N/A	N/A			Pass	Pass	Pass	N/A	Pass	100	5 of 6	N/A	N/A
115	Processed	191107-115	Unknown		False	Gill 407									Confirmed	C11H11N3O2S	SCNBimane	248.05	807034	4.372	N/A	N/A	Target Compound	219628	1.8	1.79	-0.01	M-H	248.049	4.372	-1.7567	True	0.222	1	3634864	Method	N/A	N/A		PPB	Pass	Pass	Pass	N/A	Pass	62.4584	2 of 5	N/A	N/A
115	Processed	191107-115	Unknown		False	Gill 407									Confirmed	C10[13]CH11N2[15]NO2S	SCNBimaneIS	250.05	3634864	1	1	N/A	Internal Standard	898974	1.8	1.79	-0.01	M-H	250.05	1	-1.7157	True	N/A	N/A	N/A	Method	N/A	N/A			Pass	Pass	Pass	N/A	Pass	100	5 of 6	N/A	N/A
116	Processed	191107-116	Unknown		False	Gill 408									Confirmed	C11H11N3O2S	SCNBimane	248.05	1357501	6.931	N/A	N/A	Target Compound	359872	1.8	1.79	-0.01	M-H	248.049	6.931	-1.6337	True	0.369	1	3679912	Method	N/A	N/A		PPB	Pass	Pass	Pass	N/A	Pass	62.9091	3 of 5	N/A	N/A
116	Processed	191107-116	Unknown		False	Gill 408									Confirmed	C10[13]CH11N2[15]NO2S	SCNBimaneIS	250.05	3679912	1	1	N/A	Internal Standard	890632	1.8	1.79	-0.01	M-H	250.05	1	-1.5327	True	N/A	N/A	N/A	Method	N/A	N/A			Pass	Pass	Pass	N/A	Pass	100	5 of 6	N/A	N/A
117	Processed	191107-117	Unknown		False	Gill 409									Identified	C11H11N3O2S	SCNBimane	248.05	3011338	15.395	N/A	N/A	Target Compound	807303	1.8	1.8	0.00	M-H	248.049	15.395	-1.7567	True	0.855	1	3523659	Method	N/A	N/A		PPB	Pass	Pass	Fail	N/A	Pass	48.3642	4 of 6	N/A	N/A
117	Processed	191107-117	Unknown		False	Gill 409									Confirmed	C10[13]CH11N2[15]NO2S	SCNBimaneIS	250.05	3523659	1	1	N/A	Internal Standard	869681	1.8	1.8	0.00	M-H	250.05	1	-1.4716	True	N/A	N/A	N/A	Method	N/A	N/A			Pass	Pass	Pass	N/A	Pass	100	5 of 6	N/A	N/A
118	Processed	191107-118	Unknown		False	Liver 397									Confirmed	C11H11N3O2S	SCNBimane	248.05	487151	2.988	N/A	N/A	Target Compound	130679	1.8	1.8	0.00	M-H	248.049	2.988	-1.6337	True	0.143	1	3415275	Method	N/A	N/A		PPB	Pass	Pass	Pass	N/A	Pass	79.8988	3 of 5	N/A	N/A
118	Processed	191107-118	Unknown		False	Liver 397									Confirmed	C10[13]CH11N2[15]NO2S	SCNBimaneIS	250.05	3415275	1	1	N/A	Internal Standard	830914	1.8	1.8	0.00	M-H	250.05	1	-1.5327	True	N/A	N/A	N/A	Method	N/A	N/A			Pass	Pass	Pass	N/A	Pass	100	5 of 6	N/A	N/A
119	Processed	191107-119	Unknown		False	Liver 398									Confirmed	C11H11N3O2S	SCNBimane	248.05	3433091	18.983	N/A	N/A	Target Compound	926279	1.8	1.79	-0.01	M-H	248.05	18.983	-1.4491	True	1.061	1	3237113	Method	N/A	N/A		PPB	Pass	Pass	Pass	N/A	Pass	60.0202	4 of 7	N/A	N/A
119	Processed	191107-119	Unknown		False	Liver 398									Confirmed	C10[13]CH11N2[15]NO2S	SCNBimaneIS	250.05	3237113	1	1	N/A	Internal Standard	790267	1.8	1.79	-0.01	M-H	250.05	1	-1.1665	True	N/A	N/A	N/A	Method	N/A	N/A			Pass	Pass	Pass	N/A	Pass	100	5 of 6	N/A	N/A
120	Processed	191107-120	Unknown		False	Liver 399									Identified	C11H11N3O2S	SCNBimane	248.05	1119878	6.393	N/A	N/A	Target Compound	300346	1.8	1.79	-0.01	M-H	248.049	6.393	-1.6337	True	0.338	1	3313062	Method	N/A	N/A		PPB	Pass	Pass	Fail	N/A	Pass	53.2031	3 of 5	N/A	N/A
120	Processed	191107-120	Unknown		False	Liver 399									Confirmed	C10[13]CH11N2[15]NO2S	SCNBimaneIS	250.05	3313062	1	1	N/A	Internal Standard	807977	1.8	1.79	-0.01	M-H	250.05	1	-1.4716	True	N/A	N/A	N/A	Method	N/A	N/A			Pass	Pass	Pass	N/A	Pass	100	5 of 6	N/A	N/A
121	Processed	191107-121	Unknown		False	Liver 400									Confirmed	C11H11N3O2S	SCNBimane	248.05	9132160	51.176	N/A	N/A	Target Compound	2476263	1.8	1.79	-0.01	M-H	248.049	51.176	-2.0028	True	2.908	1	3140398	Method	N/A	N/A		PPB	Pass	Pass	Pass	N/A	Pass	87.4999	7 of 9	N/A	N/A
121	Processed	191107-121	Unknown		False	Liver 400									Confirmed	C10[13]CH11N2[15]NO2S	SCNBimaneIS	250.05	3140398	1	1	N/A	Internal Standard	776748	1.8	1.79	-0.01	M-H	250.05	1	-1.2275	True	N/A	N/A	N/A	Method	N/A	N/A			Pass	Pass	Pass	N/A	Pass	100	5 of 5	N/A	N/A
122	Processed	191107-122	Unknown		False	Liver 401									Confirmed	C11H11N3O2S	SCNBimane	248.05	512585	3.039	N/A	N/A	Target Compound	140015	1.8	1.8	0.00	M-H	248.05	3.039	-1.2646	True	0.146	1	3521012	Method	N/A	N/A		PPB	Pass	Pass	Pass	N/A	Pass	61.4982	2 of 5	N/A	N/A
122	Processed	191107-122	Unknown		False	Liver 401									Confirmed	C10[13]CH11N2[15]NO2S	SCNBimaneIS	250.05	3521012	1	1	N/A	Internal Standard	869771	1.8	1.8	0.00	M-H	250.05	1	-1.2886	True	N/A	N/A	N/A	Method	N/A	N/A			Pass	Pass	Pass	N/A	Pass	100	5 of 6	N/A	N/A
123	Processed	191107-123	Unknown		False	Liver 402									Confirmed	C11H11N3O2S	SCNBimane	248.05	5905562	30.684	N/A	N/A	Target Compound	1614880	1.8	1.79	-0.01	M-H	248.049	30.684	-1.8797	True	1.732	1	3409686	Method	N/A	N/A		PPB	Pass	Pass	Pass	N/A	Pass	75.7505	5 of 8	N/A	N/A
123	Processed	191107-123	Unknown		False	Liver 402									Confirmed	C10[13]CH11N2[15]NO2S	SCNBimaneIS	250.05	3409686	1	1	N/A	Internal Standard	848875	1.8	1.79	-0.01	M-H	250.05	1	-1.4106	True	N/A	N/A	N/A	Method	N/A	N/A			Pass	Pass	Pass	N/A	Pass	100	5 of 6	N/A	N/A
124	Processed	191107-124	Unknown		False	Liver 403									Confirmed	C11H11N3O2S	SCNBimane	248.05	742440	5.057	N/A	N/A	Target Compound	203189	1.8	1.79	-0.01	M-H	248.049	5.057	-1.5106	True	0.261	1	2840958	Method	N/A	N/A		PPB	Pass	Pass	Pass	N/A	Pass	64.1663	2 of 5	N/A	N/A
124	Processed	191107-124	Unknown		False	Liver 403									Confirmed	C10[13]CH11N2[15]NO2S	SCNBimaneIS	250.05	2840958	1	1	N/A	Internal Standard	705001	1.8	1.8	0.00	M-H	250.05	1	-1.5937	True	N/A	N/A	N/A	Method	N/A	N/A			Pass	Pass	Pass	N/A	Pass	100	5 of 5	N/A	N/A
125	Processed	191107-125	Unknown		False	Liver 404									Confirmed	C11H11N3O2S	SCNBimane	248.05	558977	4.038	N/A	N/A	Target Compound	151527	1.8	1.79	-0.01	M-H	248.05	4.038	-1.4491	True	0.203	1	2755253	Method	N/A	N/A		PPB	Pass	Pass	Pass	N/A	Pass	59.5897	2 of 5	N/A	N/A
125	Processed	191107-125	Unknown		False	Liver 404									Confirmed	C10[13]CH11N2[15]NO2S	SCNBimaneIS	250.05	2755253	1	1	N/A	Internal Standard	697414	1.8	1.79	-0.01	M-H	250.05	1	-1.5327	True	N/A	N/A	N/A	Method	N/A	N/A			Pass	Pass	Pass	N/A	Pass	100	5 of 5	N/A	N/A
126	Processed	191107-126	Unknown		False	Liver 405									Confirmed	C11H11N3O2S	SCNBimane	248.05	850489	6.262	N/A	N/A	Target Compound	229224	1.8	1.8	0.00	M-H	248.05	6.262	-1.3261	True	0.331	1	2573109	Method	N/A	N/A		PPB	Pass	Pass	Pass	N/A	Pass	60.2283	3 of 5	N/A	N/A
126	Processed	191107-126	Unknown		False	Liver 405									Confirmed	C10[13]CH11N2[15]NO2S	SCNBimaneIS	250.05	2573109	1	1	N/A	Internal Standard	655259	1.8	1.8	0.00	M-H	250.05	1	-1.2275	True	N/A	N/A	N/A	Method	N/A	N/A			Pass	Pass	Pass	N/A	Pass	100	5 of 5	N/A	N/A
127	Processed	191107-127	Unknown		False	Liver 406									Identified	C11H11N3O2S	SCNBimane	248.05	446128	3.175	N/A	N/A	Target Compound	119686	1.8	1.78	-0.02	M-H	248.05	3.175	-1.2031	True	0.153	1	2909115	Method	N/A	N/A		PPB	Pass	Pass	Fail	N/A	Pass	58.9551	2 of 5	N/A	N/A
127	Processed	191107-127	Unknown		False	Liver 406									Confirmed	C10[13]CH11N2[15]NO2S	SCNBimaneIS	250.05	2909115	1	1	N/A	Internal Standard	717663	1.8	1.79	-0.01	M-H	250.05	1	-1.4106	True	N/A	N/A	N/A	Method	N/A	N/A			Pass	Pass	Pass	N/A	Pass	100	5 of 6	N/A	N/A
128	Processed	191107-128	Unknown		False	Liver 407									Confirmed	C11H11N3O2S	SCNBimane	248.05	740459	4.751	N/A	N/A	Target Compound	209133	1.8	1.79	-0.01	M-H	248.049	4.751	-1.5106	True	0.244	1	3037154	Method	N/A	N/A		PPB	Pass	Pass	Pass	N/A	Pass	59.6862	2 of 5	N/A	N/A
128	Processed	191107-128	Unknown		False	Liver 407									Confirmed	C10[13]CH11N2[15]NO2S	SCNBimaneIS	250.05	3037154	1	1	N/A	Internal Standard	777155	1.8	1.79	-0.01	M-H	250.05	1	-1.4106	True	N/A	N/A	N/A	Method	N/A	N/A			Pass	Pass	Pass	N/A	Pass	100	5 of 5	N/A	N/A
129	Processed	191107-129	Unknown		False	Liver 408									Confirmed	C11H11N3O2S	SCNBimane	248.05	1085876	6.987	N/A	N/A	Target Compound	293390	1.8	1.79	-0.01	M-H	248.05	6.987	-1.4491	True	0.372	1	2918314	Method	N/A	N/A		PPB	Pass	Pass	Pass	N/A	Pass	60.0303	3 of 5	N/A	N/A
129	Processed	191107-129	Unknown		False	Liver 408									Confirmed	C10[13]CH11N2[15]NO2S	SCNBimaneIS	250.05	2918314	1	1	N/A	Internal Standard	736942	1.8	1.79	-0.01	M-H	250.05	1	-1.2886	True	N/A	N/A	N/A	Method	N/A	N/A			Pass	Pass	Pass	N/A	Pass	100	5 of 6	N/A	N/A
130	Processed	191107-130	Unknown		False	Liver 409									Identified	C11H11N3O2S	SCNBimane	248.05	1732923	10.879	N/A	N/A	Target Compound	468640	1.8	1.79	-0.01	M-H	248.049	10.879	-1.5106	True	0.595	1	2910207	Method	N/A	N/A		PPB	Pass	Pass	Fail	N/A	Pass	57.8902	4 of 6	N/A	N/A
130	Processed	191107-130	Unknown		False	Liver 409									Confirmed	C10[13]CH11N2[15]NO2S	SCNBimaneIS	250.05	2910207	1	1	N/A	Internal Standard	727750	1.8	1.79	-0.01	M-H	250.05	1	-1.2886	True	N/A	N/A	N/A	Method	N/A	N/A			Pass	Pass	Pass	N/A	Pass	100	5 of 5	N/A	N/A
131	Processed	191107-131	Unknown		False	Tissue 397									Identified	C11H11N3O2S	SCNBimane	248.05	1642000	10.882	N/A	N/A	Target Compound	453807	1.8	1.79	-0.01	M-H	248.05	10.882	-1.3261	True	0.596	1	2756830	Method	N/A	N/A		PPB	Pass	Pass	Fail	N/A	Pass	57.6138	3 of 5	N/A	N/A
131	Processed	191107-131	Unknown		False	Tissue 397									Confirmed	C10[13]CH11N2[15]NO2S	SCNBimaneIS	250.05	2756830	1	1	N/A	Internal Standard	707946	1.8	1.79	-0.01	M-H	250.05	1	-1.1055	True	N/A	N/A	N/A	Method	N/A	N/A			Pass	Pass	Pass	N/A	Pass	100	5 of 5	N/A	N/A
132	Processed	191107-132	Unknown		False	Tissue 398									Identified	C11H11N3O2S	SCNBimane	248.05	349674	2.922	N/A	N/A	Target Compound	94789	1.8	1.79	-0.01	M-H	248.05	2.922	-1.2646	True	0.139	1	2518408	Method	N/A	N/A		PPB	Pass	Pass	Fail	N/A	Pass	28.7258	2 of 5	N/A	N/A
132	Processed	191107-132	Unknown		False	Tissue 398									Confirmed	C10[13]CH11N2[15]NO2S	SCNBimaneIS	250.05	2518408	1	1	N/A	Internal Standard	628485	1.8	1.79	-0.01	M-H	250.05	1	-1.2886	True	N/A	N/A	N/A	Method	N/A	N/A			Pass	Pass	Pass	N/A	Pass	100	5 of 5	N/A	N/A
133	Processed	191107-133	Unknown		False	Tissue 399									Confirmed	C11H11N3O2S	SCNBimane	248.05	1129269	7.453	N/A	N/A	Target Compound	305726	1.8	1.79	-0.01	M-H	248.05	7.453	-1.4491	True	0.399	1	2831354	Method	N/A	N/A		PPB	Pass	Pass	Pass	N/A	Pass	60.046	3 of 5	N/A	N/A
133	Processed	191107-133	Unknown		False	Tissue 399									Confirmed	C10[13]CH11N2[15]NO2S	SCNBimaneIS	250.05	2831354	1	1	N/A	Internal Standard	709106	1.8	1.79	-0.01	M-H	250.05	1	-1.2886	True	N/A	N/A	N/A	Method	N/A	N/A			Pass	Pass	Pass	N/A	Pass	100	5 of 5	N/A	N/A
134	Processed	191107-134	Unknown		False	Tissue 400									Identified	C11H11N3O2S	SCNBimane	248.05	880871	6.654	N/A	N/A	Target Compound	241099	1.8	1.8	0.00	M-H	248.05	6.654	-1.4491	True	0.353	1	2495317	Method	N/A	N/A		PPB	Pass	Pass	Fail	N/A	Pass	53.998	4 of 6	N/A	N/A
134	Processed	191107-134	Unknown		False	Tissue 400									Confirmed	C10[13]CH11N2[15]NO2S	SCNBimaneIS	250.05	2495317	1	1	N/A	Internal Standard	640592	1.8	1.8	0.00	M-H	250.05	1	-1.2275	True	N/A	N/A	N/A	Method	N/A	N/A			Pass	Pass	Pass	N/A	Pass	100	5 of 5	N/A	N/A
135	Processed	191107-135	Unknown		False	Tissue 401									Confirmed	C11H11N3O2S	SCNBimane	248.05	756075	5.133	N/A	N/A	Target Compound	208027	1.8	1.79	-0.01	M-H	248.05	5.133	-1.3261	True	0.266	1	2845108	Method	N/A	N/A		PPB	Pass	Pass	Pass	N/A	Pass	60.4127	3 of 6	N/A	N/A
135	Processed	191107-135	Unknown		False	Tissue 401									Confirmed	C10[13]CH11N2[15]NO2S	SCNBimaneIS	250.05	2845108	1	1	N/A	Internal Standard	713578	1.8	1.8	0.00	M-H	250.05	1	-1.2275	True	N/A	N/A	N/A	Method	N/A	N/A			Pass	Pass	Pass	N/A	Pass	100	5 of 5	N/A	N/A
136	Processed	191107-136	Unknown		False	Tissue 402									Identified	C11H11N3O2S	SCNBimane	248.05	1585646	10.501	N/A	N/A	Target Compound	424115	1.8	1.78	-0.02	M-H	248.05	10.501	-1.2646	True	0.574	1	2763464	Method	N/A	N/A		PPB	Pass	Pass	Fail	N/A	Pass	56.8568	3 of 5	N/A	N/A
136	Processed	191107-136	Unknown		False	Tissue 402									Confirmed	C10[13]CH11N2[15]NO2S	SCNBimaneIS	250.05	2763464	1	1	N/A	Internal Standard	698488	1.8	1.78	-0.02	M-H	250.05	1	-1.1055	True	N/A	N/A	N/A	Method	N/A	N/A			Pass	Pass	Pass	N/A	Pass	100	5 of 5	N/A	N/A
137	Processed	191107-137	Unknown		False	Tissue 403									Confirmed	C11H11N3O2S	SCNBimane	248.05	4618869	28.456	N/A	N/A	Target Compound	1249818	1.8	1.79	-0.01	M-H	248.05	28.456	-1.2646	True	1.604	1	2879297	Method	N/A	N/A		PPB	Pass	Pass	Pass	N/A	Pass	75.3409	4 of 7	N/A	N/A
137	Processed	191107-137	Unknown		False	Tissue 403									Confirmed	C10[13]CH11N2[15]NO2S	SCNBimaneIS	250.05	2879297	1	1	N/A	Internal Standard	731717	1.8	1.79	-0.01	M-H	250.05	1	-0.7394	True	N/A	N/A	N/A	Method	N/A	N/A			Pass	Pass	Pass	N/A	Pass	100	5 of 5	N/A	N/A
138	Processed	191107-138	Unknown		False	Tissue 404									Confirmed	C11H11N3O2S	SCNBimane	248.05	1325404	8.61	N/A	N/A	Target Compound	356530	1.8	1.79	-0.01	M-H	248.05	8.61	-1.2646	True	0.465	1	2848654	Method	N/A	N/A		PPB	Pass	Pass	Pass	N/A	Pass	60.1264	3 of 5	N/A	N/A
138	Processed	191107-138	Unknown		False	Tissue 404									Confirmed	C10[13]CH11N2[15]NO2S	SCNBimaneIS	250.05	2848654	1	1	N/A	Internal Standard	716226	1.8	1.79	-0.01	M-H	250.05	1	-1.1055	True	N/A	N/A	N/A	Method	N/A	N/A			Pass	Pass	Pass	N/A	Pass	100	5 of 5	N/A	N/A
139	Processed	191107-139	Unknown		False	Tissue 405									Confirmed	C11H11N3O2S	SCNBimane	248.05	3171445	19.78	N/A	N/A	Target Compound	883949	1.8	1.79	-0.01	M-H	248.05	19.78	-1.3261	True	1.106	1	2866804	Method	N/A	N/A		PPB	Pass	Pass	Pass	N/A	Pass	86.1483	4 of 6	N/A	N/A
139	Processed	191107-139	Unknown		False	Tissue 405									Confirmed	C10[13]CH11N2[15]NO2S	SCNBimaneIS	250.05	2866804	1	1	N/A	Internal Standard	741472	1.8	1.79	-0.01	M-H	250.05	1	-0.9224	True	N/A	N/A	N/A	Method	N/A	N/A			Pass	Pass	Pass	N/A	Pass	100	5 of 5	N/A	N/A
140	Processed	191107-140	Unknown		False	Tissue 406									Identified	C11H11N3O2S	SCNBimane	248.05	2750226	16.623	N/A	N/A	Target Compound	755368	1.8	1.79	-0.01	M-H	248.05	16.623	-1.2031	True	0.925	1	2972879	Method	N/A	N/A		PPB	Pass	Pass	Fail	N/A	Pass	52.8123	4 of 6	N/A	N/A
140	Processed	191107-140	Unknown		False	Tissue 406									Confirmed	C10[13]CH11N2[15]NO2S	SCNBimaneIS	250.05	2972879	1	1	N/A	Internal Standard	752503	1.8	1.79	-0.01	M-H	250.05	1	-0.8614	True	N/A	N/A	N/A	Method	N/A	N/A			Pass	Pass	Pass	N/A	Pass	100	5 of 5	N/A	N/A
141	Processed	191107-141	Unknown		False	Tissue 407									Confirmed	C11H11N3O2S	SCNBimane	248.05	4679981	29.115	N/A	N/A	Target Compound	1281389	1.8	1.79	-0.01	M-H	248.05	29.115	-1.3876	True	1.642	1	2850174	Method	N/A	N/A		PPB	Pass	Pass	Pass	N/A	Pass	73.2711	4 of 7	N/A	N/A
141	Processed	191107-141	Unknown		False	Tissue 407									Confirmed	C10[13]CH11N2[15]NO2S	SCNBimaneIS	250.05	2850174	1	1	N/A	Internal Standard	724663	1.8	1.79	-0.01	M-H	250.05	1	-0.8614	True	N/A	N/A	N/A	Method	N/A	N/A			Pass	Pass	Pass	N/A	Pass	100	5 of 5	N/A	N/A
142	Processed	191107-142	Unknown		False	Tissue 408									Identified	C11H11N3O2S	SCNBimane	248.05	1552515	10.388	N/A	N/A	Target Compound	425537	1.8	1.79	-0.01	M-H	248.05	10.388	-1.1415	True	0.567	1	2736633	Method	N/A	N/A		PPB	Pass	Pass	Fail	N/A	Pass	57.3948	3 of 5	N/A	N/A
142	Processed	191107-142	Unknown		False	Tissue 408									Confirmed	C10[13]CH11N2[15]NO2S	SCNBimaneIS	250.05	2736633	1	1	N/A	Internal Standard	684918	1.8	1.79	-0.01	M-H	250.05	1	-0.9224	True	N/A	N/A	N/A	Method	N/A	N/A			Pass	Pass	Pass	N/A	Pass	100	5 of 5	N/A	N/A
143	Processed	191107-143	Unknown		False	Tissue 409									Confirmed	C11H11N3O2S	SCNBimane	248.05	3835091	23.985	N/A	N/A	Target Compound	1041371	1.8	1.8	0.00	M-H	248.05	23.985	-1.1415	True	1.348	1	2845961	Method	N/A	N/A		PPB	Pass	Pass	Pass	N/A	Pass	69.6199	5 of 8	N/A	N/A
143	Processed	191107-143	Unknown		False	Tissue 409									Confirmed	C10[13]CH11N2[15]NO2S	SCNBimaneIS	250.05	2845961	1	1	N/A	Internal Standard	728341	1.8	1.8	0.00	M-H	250.05	1	-0.8004	True	N/A	N/A	N/A	Method	N/A	N/A			Pass	Pass	Pass	N/A	Pass	100	5 of 5	N/A	N/A
144	Processed	191107-144	Unknown		False	H20 397									Identified	C11H11N3O2S	SCNBimane	248.05	1176340	7.905	N/A	N/A	Target Compound	330587	1.8	1.79	-0.01	M-H	248.05	7.905	-1.1415	True	0.425	1	2769311	Method	N/A	N/A		PPB	Pass	Pass	Fail	N/A	Pass	58.5543	4 of 6	N/A	N/A
144	Processed	191107-144	Unknown		False	H20 397									Confirmed	C10[13]CH11N2[15]NO2S	SCNBimaneIS	250.05	2769311	1	1	N/A	Internal Standard	704239	1.8	1.79	-0.01	M-H	250.05	1	-0.9835	True	N/A	N/A	N/A	Method	N/A	N/A			Pass	Pass	Pass	N/A	Pass	100	5 of 5	N/A	N/A
145	Processed	191107-145	Unknown		False	H20 398									Confirmed	C11H11N3O2S	SCNBimane	248.05	1013385	7.11	N/A	N/A	Target Compound	278454	1.8	1.79	-0.01	M-H	248.05	7.11	-1.0185	True	0.379	1	2672673	Method	N/A	N/A		PPB	Pass	Pass	Pass	N/A	Pass	63.5418	4 of 6	N/A	N/A
145	Processed	191107-145	Unknown		False	H20 398									Confirmed	C10[13]CH11N2[15]NO2S	SCNBimaneIS	250.05	2672673	1	1	N/A	Internal Standard	667569	1.8	1.79	-0.01	M-H	250.05	1	-0.8004	True	N/A	N/A	N/A	Method	N/A	N/A			Pass	Pass	Pass	N/A	Pass	100	5 of 5	N/A	N/A
146	Processed	191107-146	Unknown		False	H20 399									Confirmed	C11H11N3O2S	SCNBimane	248.05	480682	3.455	N/A	N/A	Target Compound	132711	1.8	1.78	-0.02	M-H	248.05	3.455	-1.1415	True	0.169	1	2836706	Method	N/A	N/A		PPB	Pass	Pass	Pass	N/A	Pass	62.6305	3 of 6	N/A	N/A
146	Processed	191107-146	Unknown		False	H20 399									Confirmed	C10[13]CH11N2[15]NO2S	SCNBimaneIS	250.05	2836706	1	1	N/A	Internal Standard	689596	1.8	1.78	-0.02	M-H	250.05	1	-1.0445	True	N/A	N/A	N/A	Method	N/A	N/A			Pass	Pass	Pass	N/A	Pass	100	5 of 6	N/A	N/A
147	Processed	191107-147	Unknown		False	H20 400									Confirmed	C11H11N3O2S	SCNBimane	248.05	667246	4.716	N/A	N/A	Target Compound	180640	1.8	1.79	-0.01	M-H	248.05	4.716	-0.957	True	0.242	1	2759510	Method	N/A	N/A		PPB	Pass	Pass	Pass	N/A	Pass	62.7595	2 of 5	N/A	N/A
147	Processed	191107-147	Unknown		False	H20 400									Confirmed	C10[13]CH11N2[15]NO2S	SCNBimaneIS	250.05	2759510	1	1	N/A	Internal Standard	671336	1.8	1.79	-0.01	M-H	250.05	1	-0.9224	True	N/A	N/A	N/A	Method	N/A	N/A			Pass	Pass	Pass	N/A	Pass	100	5 of 6	N/A	N/A
148	Processed	191107-148	Unknown		False	H20 401									Identified	C11H11N3O2S	SCNBimane	248.05	841253	6.51	N/A	N/A	Target Compound	226398	1.8	1.79	-0.01	M-H	248.05	6.51	-0.7725	True	0.345	1	2440379	Method	N/A	N/A		PPB	Pass	Pass	Fail	N/A	Pass	56.5084	4 of 6	N/A	N/A
148	Processed	191107-148	Unknown		False	H20 401									Confirmed	C10[13]CH11N2[15]NO2S	SCNBimaneIS	250.05	2440379	1	1	N/A	Internal Standard	591500	1.8	1.79	-0.01	M-H	250.05	1	-0.5563	True	N/A	N/A	N/A	Method	N/A	N/A			Pass	Pass	Pass	N/A	Pass	100	5 of 5	N/A	N/A
149	Processed	191107-149	Unknown		False	H20 402									Confirmed	C11H11N3O2S	SCNBimane	248.05	1961519	12.621	N/A	N/A	Target Compound	516262	1.8	1.79	-0.01	M-H	248.05	12.621	-1.0185	True	0.695	1	2820617	Method	N/A	N/A		PPB	Pass	Pass	Pass	N/A	Pass	60.592	3 of 5	N/A	N/A
149	Processed	191107-149	Unknown		False	H20 402									Confirmed	C10[13]CH11N2[15]NO2S	SCNBimaneIS	250.05	2820617	1	1	N/A	Internal Standard	677993	1.8	1.79	-0.01	M-H	250.05	1	-0.6783	True	N/A	N/A	N/A	Method	N/A	N/A			Pass	Pass	Pass	N/A	Pass	100	5 of 6	N/A	N/A
150	Processed	191107-150	Unknown		False	H20 403									Identified	C11H11N3O2S	SCNBimane	248.05	2070823	14.503	N/A	N/A	Target Compound	555149	1.8	1.79	-0.01	M-H	248.05	14.503	-0.834	True	0.803	1	2577508	Method	N/A	N/A		PPB	Pass	Pass	Fail	N/A	Pass	45.8325	3 of 5	N/A	N/A
150	Processed	191107-150	Unknown		False	H20 403									Confirmed	C10[13]CH11N2[15]NO2S	SCNBimaneIS	250.05	2577508	1	1	N/A	Internal Standard	628477	1.8	1.79	-0.01	M-H	250.05	1	-0.5563	True	N/A	N/A	N/A	Method	N/A	N/A			Pass	Pass	Pass	N/A	Pass	100	5 of 5	N/A	N/A
151	Processed	191107-151	Unknown		False	H20 404									Confirmed	C11H11N3O2S	SCNBimane	248.05	1284056	8.434	N/A	N/A	Target Compound	345180	1.8	1.79	-0.01	M-H	248.05	8.434	-0.8955	True	0.455	1	2821207	Method	N/A	N/A		PPB	Pass	Pass	Pass	N/A	Pass	65.8986	3 of 5	N/A	N/A
151	Processed	191107-151	Unknown		False	H20 404									Confirmed	C10[13]CH11N2[15]NO2S	SCNBimaneIS	250.05	2821207	1	1	N/A	Internal Standard	689921	1.8	1.79	-0.01	M-H	250.05	1	-0.6173	True	N/A	N/A	N/A	Method	N/A	N/A			Pass	Pass	Pass	N/A	Pass	100	5 of 6	N/A	N/A
152	Processed	191107-152	Unknown		False	H20 405									Confirmed	C11H11N3O2S	SCNBimane	248.05	288325	2.166	N/A	N/A	Target Compound	76520	1.8	1.79	-0.01	M-H	248.05	2.166	-0.4649	True	0.095	1	3020191	Method	N/A	N/A		PPB	Pass	Pass	Pass	N/A	Pass	59.7648	2 of 5	N/A	N/A
152	Processed	191107-152	Unknown		False	H20 405									Confirmed	C10[13]CH11N2[15]NO2S	SCNBimaneIS	250.05	3020191	1	1	N/A	Internal Standard	722615	1.8	1.79	-0.01	M-H	250.05	1	-0.5563	True	N/A	N/A	N/A	Method	N/A	N/A			Pass	Pass	Pass	N/A	Pass	100	5 of 6	N/A	N/A
153	Processed	191107-153	Unknown		False	H20 406									Identified	C11H11N3O2S	SCNBimane	248.05	2613696	16.56	N/A	N/A	Target Compound	719585	1.8	1.79	-0.01	M-H	248.05	16.56	-0.7109	True	0.921	1	2836410	Method	N/A	N/A		PPB	Pass	Pass	Fail	N/A	Pass	54.3463	5 of 7	N/A	N/A
153	Processed	191107-153	Unknown		False	H20 406									Confirmed	C10[13]CH11N2[15]NO2S	SCNBimaneIS	250.05	2836410	1	1	N/A	Internal Standard	695016	1.8	1.79	-0.01	M-H	250.05	1	-0.3732	True	N/A	N/A	N/A	Method	N/A	N/A			Pass	Pass	Pass	N/A	Pass	100	5 of 6	N/A	N/A
154	Processed	191107-154	Unknown		False	H20 407									Identified	C11H11N3O2S	SCNBimane	248.05	405093	2.932	N/A	N/A	Target Compound	111401	1.8	1.79	-0.01	M-H	248.05	2.932	-0.834	True	0.139	1	2905659	Method	N/A	N/A		PPB	Pass	Pass	Fail	N/A	Pass	29.3325	3 of 5	N/A	N/A
154	Processed	191107-154	Unknown		False	H20 407									Confirmed	C10[13]CH11N2[15]NO2S	SCNBimaneIS	250.05	2905659	1	1	N/A	Internal Standard	710304	1.8	1.79	-0.01	M-H	250.05	1	-0.8614	True	N/A	N/A	N/A	Method	N/A	N/A			Pass	Pass	Pass	N/A	Pass	100	6 of 6	N/A	N/A
155	Processed	191107-155	Unknown		False	H20 408									Identified	C11H11N3O2S	SCNBimane	248.05	1349021	9.19	N/A	N/A	Target Compound	367081	1.8	1.79	-0.01	M-H	248.05	9.19	-0.7725	True	0.499	1	2706098	Method	N/A	N/A		PPB	Pass	Pass	Fail	N/A	Pass	59.427	3 of 5	N/A	N/A
155	Processed	191107-155	Unknown		False	H20 408									Confirmed	C10[13]CH11N2[15]NO2S	SCNBimaneIS	250.05	2706098	1	1	N/A	Internal Standard	674455	1.8	1.79	-0.01	M-H	250.05	1	-0.4953	True	N/A	N/A	N/A	Method	N/A	N/A			Pass	Pass	Pass	N/A	Pass	100	5 of 5	N/A	N/A
156	Processed	191107-156	Unknown		False	H20 409									Confirmed	C11H11N3O2S	SCNBimane	248.05	3144401	20.027	N/A	N/A	Target Compound	856833	1.8	1.79	-0.01	M-H	248.05	20.027	-0.8955	True	1.12	1	2806395	Method	N/A	N/A		PPB	Pass	Pass	Pass	N/A	Pass	61.8605	4 of 7	N/A	N/A
156	Processed	191107-156	Unknown		False	H20 409									Confirmed	C10[13]CH11N2[15]NO2S	SCNBimaneIS	250.05	2806395	1	1	N/A	Internal Standard	696618	1.8	1.79	-0.01	M-H	250.05	1	-0.5563	True	N/A	N/A	N/A	Method	N/A	N/A			Pass	Pass	Pass	N/A	Pass	100	5 of 5	N/A	N/A
157	Processed	191107-157	Unknown		False	Turbo Vap H20									Confirmed	C11H11N3O2S	SCNBimane	248.05	2040751	12.914	N/A	N/A	Target Compound	556846	1.8	1.79	-0.01	M-H	248.05	12.914	-0.7725	True	0.712	1	2865157	Method	N/A	N/A		PPB	Pass	Pass	Pass	N/A	Pass	61.1917	4 of 6	N/A	N/A
157	Processed	191107-157	Unknown		False	Turbo Vap H20									Confirmed	C10[13]CH11N2[15]NO2S	SCNBimaneIS	250.05	2865157	1	1	N/A	Internal Standard	706021	1.8	1.79	-0.01	M-H	250.05	1	-0.4342	True	N/A	N/A	N/A	Method	N/A	N/A			Pass	Pass	Pass	N/A	Pass	100	5 of 6	N/A	N/A
[truncated: 12 more columns]

## Sheet: Filter
Acquisition Order	Status	Filename	Sample Type	Level	Excluded	Sample ID	Sample Name	Comments	ColumnHeader1	ColumnHeader2	ColumnHeader3	ColumnHeader4	ColumnHeader5	ColumnHeader6	Confirm	Formula	Compound	m/z (Expected)	Area	Calculated Amt	Theoretical Amt	%Diff	Compound Type	Height	Expected RT	Actual RT	RT Delta	Adduct	m/z (Apex)	Sample Amt	m/z (Delta(ppm))	Active	Response Ratio	ISTD Amt	ISTD Response	Integration Mode	%RSD	%CV	Channel	Final Units	PK	IR	IP	LS	FI	Isotopic Pattern Score (%)	Num Isotopes Matched	Lib Match Name	Library Score (%)
1	Processed	191107-001	Matrix Blank		False	Blank									Identified	C11H11N3O2S	SCNBimane	248.05	17855	0.664	N/A	N/A	Target Compound	10079	1.8	1.83	0.03	M-H	248.049	0.664	-2.3718	True	0.009	1	1929689	Method	N/A	N/A		PPB	Pass	Pass	Fail	N/A	Pass	100	1 of 1	N/A	N/A
1	Processed	191107-001	Matrix Blank		False	Blank									Confirmed	C10[13]CH11N2[15]NO2S	SCNBimaneIS	250.05	1929689	1	1	N/A	Internal Standard	515483	1.8	1.82	0.02	M-H	250.05	1	-1.0445	True	N/A	N/A	N/A	Method	N/A	N/A			Pass	Pass	Pass	N/A	Pass	100	3 of 3	N/A	N/A
2	Processed	191107-002	Cal Std	STD 1	False	5 ppb									Confirmed	C11H11N3O2S	SCNBimane	248.05	482225	5.44	5	8.81	Target Compound	136488	1.8	1.81	0.01	M-H	248.05	5.44	-0.834	True	0.283	1	1701810	Method	N/A	N/A		PPB	Pass	Pass	Pass	N/A	Pass	62.9032	2 of 5	N/A	N/A
2	Processed	191107-002	Cal Std	STD 1	False	5 ppb									Confirmed	C10[13]CH11N2[15]NO2S	SCNBimaneIS	250.05	1701810	1	1	0	Internal Standard	434945	1.8	1.81	0.01	M-H	250.05	1	-0.6173	True	N/A	N/A	N/A	Method	N/A	N/A			Pass	Pass	Pass	N/A	Pass	100	5 of 5	N/A	N/A
3	Processed	191107-003	Cal Std	STD 2	False	10 ppb									Identified	C11H11N3O2S	SCNBimane	248.05	833369	9.437	10	-5.63	Target Compound	231569	1.8	1.81	0.01	M-H	248.05	9.437	-0.957	True	0.513	1	1625418	Method	N/A	N/A		PPB	Pass	Pass	Fail	N/A	Pass	58.4587	3 of 5	N/A	N/A
3	Processed	191107-003	Cal Std	STD 2	False	10 ppb									Confirmed	C10[13]CH11N2[15]NO2S	SCNBimaneIS	250.05	1625418	1	1	0	Internal Standard	411064	1.8	1.81	0.01	M-H	250.05	1	-0.8004	True	N/A	N/A	N/A	Method	N/A	N/A			Pass	Pass	Pass	N/A	Pass	100	5 of 5	N/A	N/A
4	Processed	191107-004	Cal Std	STD 3	False	25 ppb									Confirmed	C11H11N3O2S	SCNBimane	248.05	2403779	26.166	25	4.66	Target Compound	663780	1.8	1.8	0.00	M-H	248.05	26.166	-1.2646	True	1.473	1	1632206	Method	N/A	N/A		PPB	Pass	Pass	Pass	N/A	Pass	72.4596	3 of 5	N/A	N/A
4	Processed	191107-004	Cal Std	STD 3	False	25 ppb									Confirmed	C10[13]CH11N2[15]NO2S	SCNBimaneIS	250.05	1632206	1	1	0	Internal Standard	414670	1.8	1.8	0.00	M-H	250.05	1	-0.8004	True	N/A	N/A	N/A	Method	N/A	N/A			Pass	Pass	Pass	N/A	Pass	100	5 of 5	N/A	N/A
5	Processed	191107-005	Cal Std	STD 4	False	50 ppb									Confirmed	C11H11N3O2S	SCNBimane	248.05	3875969	43.202	50	-13.6	Target Compound	1047933	1.8	1.81	0.01	M-H	248.05	43.202	-1.3261	True	2.45	1	1581769	Method	N/A	N/A		PPB	Pass	Pass	Pass	N/A	Pass	83.7957	3 of 5	N/A	N/A
5	Processed	191107-005	Cal Std	STD 4	False	50 ppb									Confirmed	C10[13]CH11N2[15]NO2S	SCNBimaneIS	250.05	1581769	1	1	0	Internal Standard	401381	1.8	1.81	0.01	M-H	250.05	1	-0.6173	True	N/A	N/A	N/A	Method	N/A	N/A			Pass	Pass	Pass	N/A	Pass	96.53	4 of 5	N/A	N/A
6	Processed	191107-006	Cal Std	STD 5	False	100 ppb									Confirmed	C11H11N3O2S	SCNBimane	248.05	8593365	105.755	100	5.75	Target Compound	2378874	1.8	1.81	0.01	M-H	248.05	105.755	-1.3261	True	6.04	1	1422724	Method	N/A	N/A		PPB	Pass	Pass	Pass	N/A	Pass	92.5846	6 of 8	N/A	N/A
6	Processed	191107-006	Cal Std	STD 5	False	100 ppb									Confirmed	C10[13]CH11N2[15]NO2S	SCNBimaneIS	250.05	1422724	1	1	0	Internal Standard	362740	1.8	1.81	0.01	M-H	250.05	1	0.359	True	N/A	N/A	N/A	Method	N/A	N/A			Pass	Pass	Pass	N/A	Pass	94.5366	4 of 5	N/A	N/A
7	Processed	191107-007	Unknown		False	500 ppb									Confirmed	C11H11N3O2S	SCNBimane	248.05	28642663	308.23	N/A	N/A	Target Compound	7807781	1.8	1.8	0.00	M-H	248.05	308.23	-1.2646	True	17.66	1	1621940	Method	N/A	N/A		PPB	Pass	Pass	Pass	N/A	Pass	100	8 of 9	N/A	N/A
7	Processed	191107-007	Unknown		False	500 ppb									Confirmed	C10[13]CH11N2[15]NO2S	SCNBimaneIS	250.05	1621940	1	1	N/A	Internal Standard	416348	1.8	1.8	0.00	M-H	250.05	1	-0.9224	True	N/A	N/A	N/A	Method	N/A	N/A			Pass	Pass	Pass	N/A	Pass	100	5 of 5	N/A	N/A
8	Processed	191107-008	Unknown		False	Plasama 01									Confirmed	C11H11N3O2S	SCNBimane	248.05	2048639	21.245	N/A	N/A	Target Compound	563582	1.8	1.8	0.00	M-H	248.05	21.245	-1.0185	True	1.19	1	1721048	Method	N/A	N/A		PPB	Pass	Pass	Pass	N/A	Pass	64.0461	3 of 5	N/A	N/A
8	Processed	191107-008	Unknown		False	Plasama 01									Confirmed	C10[13]CH11N2[15]NO2S	SCNBimaneIS	250.05	1721048	1	1	N/A	Internal Standard	434963	1.8	1.8	0.00	M-H	250.05	1	-0.5563	True	N/A	N/A	N/A	Method	N/A	N/A			Pass	Pass	Pass	N/A	Pass	96.5722	4 of 5	N/A	N/A
9	Processed	191107-009	Unknown		False	Plasama 02									Identified	C11H11N3O2S	SCNBimane	248.05	86996	1.385	N/A	N/A	Target Compound	27670	1.8	1.81	0.01	M-H	248.05	1.385	-0.8955	True	0.051	1	1718116	Method	N/A	N/A		PPB	Pass	Pass	Fail	N/A	Pass	0	2 of 3	N/A	N/A
9	Processed	191107-009	Unknown		False	Plasama 02									Confirmed	C10[13]CH11N2[15]NO2S	SCNBimaneIS	250.05	1718116	1	1	N/A	Internal Standard	441584	1.8	1.81	0.01	M-H	250.05	1	-0.9224	True	N/A	N/A	N/A	Method	N/A	N/A			Pass	Pass	Pass	N/A	Pass	96.479	4 of 5	N/A	N/A
10	Processed	191107-010	Unknown		False	Plasama 03									Confirmed	C11H11N3O2S	SCNBimane	248.05	151428	2.084	N/A	N/A	Target Compound	42501	1.8	1.81	0.01	M-H	248.05	2.084	-1.1415	True	0.091	1	1668704	Method	N/A	N/A		PPB	Pass	Pass	Pass	N/A	Pass	67.1056	2 of 3	N/A	N/A
10	Processed	191107-010	Unknown		False	Plasama 03									Confirmed	C10[13]CH11N2[15]NO2S	SCNBimaneIS	250.05	1668704	1	1	N/A	Internal Standard	419915	1.8	1.8	0.00	M-H	250.05	1	-0.8004	True	N/A	N/A	N/A	Method	N/A	N/A			Pass	Pass	Pass	N/A	Pass	98.196	4 of 5	N/A	N/A
11	Processed	191107-011	Unknown		False	Plasama 04									Confirmed	C11H11N3O2S	SCNBimane	248.05	152129	2.019	N/A	N/A	Target Compound	41571	1.8	1.8	0.00	M-H	248.05	2.019	-1.4491	True	0.087	1	1748784	Method	N/A	N/A		PPB	Pass	Pass	Pass	N/A	Pass	66.9548	3 of 4	N/A	N/A
11	Processed	191107-011	Unknown		False	Plasama 04									Confirmed	C10[13]CH11N2[15]NO2S	SCNBimaneIS	250.05	1748784	1	1	N/A	Internal Standard	446844	1.8	1.8	0.00	M-H	250.05	1	-1.1055	True	N/A	N/A	N/A	Method	N/A	N/A			Pass	Pass	Pass	N/A	Pass	100	5 of 5	N/A	N/A
12	Processed	191107-012	Unknown		False	Plasama 05									Identified	C11H11N3O2S	SCNBimane	248.05	131319	1.69	N/A	N/A	Target Compound	38362	1.8	1.8	0.00	M-H	248.05	1.69	-1.3261	True	0.068	1	1926668	Method	N/A	N/A		PPB	Pass	Pass	Fail	N/A	Pass	8.25026	2 of 3	N/A	N/A
12	Processed	191107-012	Unknown		False	Plasama 05									Confirmed	C10[13]CH11N2[15]NO2S	SCNBimaneIS	250.05	1926668	1	1	N/A	Internal Standard	493706	1.8	1.8	0.00	M-H	250.05	1	-1.1055	True	N/A	N/A	N/A	Method	N/A	N/A			Pass	Pass	Pass	N/A	Pass	100	5 of 5	N/A	N/A
13	Processed	191107-013	Unknown		False	Plasama 06									Confirmed	C11H11N3O2S	SCNBimane	248.05	539605	5.759	N/A	N/A	Target Compound	148809	1.8	1.81	0.01	M-H	248.05	5.759	-1.2646	True	0.302	1	1788953	Method	N/A	N/A		PPB	Pass	Pass	Pass	N/A	Pass	63.0185	2 of 5	N/A	N/A
13	Processed	191107-013	Unknown		False	Plasama 06									Confirmed	C10[13]CH11N2[15]NO2S	SCNBimaneIS	250.05	1788953	1	1	N/A	Internal Standard	453632	1.8	1.81	0.01	M-H	250.05	1	-1.0445	True	N/A	N/A	N/A	Method	N/A	N/A			Pass	Pass	Pass	N/A	Pass	100	5 of 5	N/A	N/A
14	Processed	191107-014	Unknown		False	Plasama 07									Identified	C11H11N3O2S	SCNBimane	248.05	323983	3.819	N/A	N/A	Target Compound	89901	1.8	1.81	0.01	M-H	248.05	3.819	-1.3876	True	0.19	1	1702155	Method	N/A	N/A		PPB	Pass	Pass	Fail	N/A	Pass	40.8487	2 of 4	N/A	N/A
14	Processed	191107-014	Unknown		False	Plasama 07									Confirmed	C10[13]CH11N2[15]NO2S	SCNBimaneIS	250.05	1702155	1	1	N/A	Internal Standard	426994	1.8	1.81	0.01	M-H	250.05	1	-1.3496	True	N/A	N/A	N/A	Method	N/A	N/A			Pass	Pass	Pass	N/A	Pass	100	5 of 5	N/A	N/A
15	Processed	191107-015	Unknown		False	Plasama 08									Identified	C11H11N3O2S	SCNBimane	248.05	391458	4.447	N/A	N/A	Target Compound	107271	1.8	1.81	0.01	M-H	248.05	4.447	-1.1415	True	0.226	1	1729473	Method	N/A	N/A		PPB	Pass	Pass	Fail	N/A	Pass	45.5306	2 of 5	N/A	N/A
15	Processed	191107-015	Unknown		False	Plasama 08									Confirmed	C10[13]CH11N2[15]NO2S	SCNBimaneIS	250.05	1729473	1	1	N/A	Internal Standard	434049	1.8	1.81	0.01	M-H	250.05	1	-0.9835	True	N/A	N/A	N/A	Method	N/A	N/A			Pass	Pass	Pass	N/A	Pass	100	5 of 5	N/A	N/A
16	Processed	191107-016	Unknown		False	Plasama 09									Confirmed	C11H11N3O2S	SCNBimane	248.05	148790	2.131	N/A	N/A	Target Compound	39972	1.8	1.8	0.00	M-H	248.05	2.131	-0.8955	True	0.093	1	1591874	Method	N/A	N/A		PPB	Pass	Pass	Pass	N/A	Pass	66.8028	2 of 3	N/A	N/A
16	Processed	191107-016	Unknown		False	Plasama 09									Confirmed	C10[13]CH11N2[15]NO2S	SCNBimaneIS	250.05	1591874	1	1	N/A	Internal Standard	401961	1.8	1.8	0.00	M-H	250.05	1	-1.0445	True	N/A	N/A	N/A	Method	N/A	N/A			Pass	Pass	Pass	N/A	Pass	100	5 of 5	N/A	N/A
17	Processed	191107-017	Unknown		False	Plasama 10									Confirmed	C11H11N3O2S	SCNBimane	248.05	321701	3.71	N/A	N/A	Target Compound	89961	1.8	1.81	0.01	M-H	248.05	3.71	-1.08	True	0.184	1	1747796	Method	N/A	N/A		PPB	Pass	Pass	Pass	N/A	Pass	63.4255	2 of 4	N/A	N/A
17	Processed	191107-017	Unknown		False	Plasama 10									Confirmed	C10[13]CH11N2[15]NO2S	SCNBimaneIS	250.05	1747796	1	1	N/A	Internal Standard	443837	1.8	1.81	0.01	M-H	250.05	1	-1.1055	True	N/A	N/A	N/A	Method	N/A	N/A			Pass	Pass	Pass	N/A	Pass	100	5 of 5	N/A	N/A
18	Processed	191107-018	Unknown		False	Plasama 11									Identified	C11H11N3O2S	SCNBimane	248.05	132222	1.827	N/A	N/A	Target Compound	35969	1.8	1.8	0.00	M-H	248.05	1.827	-1.2031	True	0.076	1	1740275	Method	N/A	N/A		PPB	Pass	Pass	Fail	N/A	Pass	11.4345	2 of 3	N/A	N/A
18	Processed	191107-018	Unknown		False	Plasama 11									Confirmed	C10[13]CH11N2[15]NO2S	SCNBimaneIS	250.05	1740275	1	1	N/A	Internal Standard	442309	1.8	1.8	0.00	M-H	250.05	1	-1.2886	True	N/A	N/A	N/A	Method	N/A	N/A			Pass	Pass	Pass	N/A	Pass	100	5 of 5	N/A	N/A
19	Processed	191107-019	Unknown		False	Plasama 12									Confirmed	C11H11N3O2S	SCNBimane	248.05	393721	4.462	N/A	N/A	Target Compound	110928	1.8	1.81	0.01	M-H	248.05	4.462	-1.1415	True	0.227	1	1732889	Method	N/A	N/A		PPB	Pass	Pass	Pass	N/A	Pass	62.7473	2 of 5	N/A	N/A
19	Processed	191107-019	Unknown		False	Plasama 12									Confirmed	C10[13]CH11N2[15]NO2S	SCNBimaneIS	250.05	1732889	1	1	N/A	Internal Standard	438148	1.8	1.81	0.01	M-H	250.05	1	-1.1055	True	N/A	N/A	N/A	Method	N/A	N/A			Pass	Pass	Pass	N/A	Pass	100	5 of 5	N/A	N/A
20	Processed	191107-020	Unknown		False	Plasama 13									Confirmed	C11H11N3O2S	SCNBimane	248.05	653024	6.697	N/A	N/A	Target Compound	178155	1.8	1.8	0.00	M-H	248.05	6.697	-1.3261	True	0.355	1	1837023	Method	N/A	N/A		PPB	Pass	Pass	Pass	N/A	Pass	62.7615	3 of 5	N/A	N/A
20	Processed	191107-020	Unknown		False	Plasama 13									Confirmed	C10[13]CH11N2[15]NO2S	SCNBimaneIS	250.05	1837023	1	1	N/A	Internal Standard	457352	1.8	1.8	0.00	M-H	250.05	1	-1.2275	True	N/A	N/A	N/A	Method	N/A	N/A			Pass	Pass	Pass	N/A	Pass	100	5 of 5	N/A	N/A
21	Processed	191107-021	Unknown		False	Plasama 14									Identified	C11H11N3O2S	SCNBimane	248.05	1506167	15.253	N/A	N/A	Target Compound	406014	1.8	1.81	0.01	M-H	248.05	15.253	-1.2646	True	0.846	1	1779342	Method	N/A	N/A		PPB	Pass	Pass	Fail	N/A	Pass	47.9517	3 of 5	N/A	N/A
21	Processed	191107-021	Unknown		False	Plasama 14									Confirmed	C10[13]CH11N2[15]NO2S	SCNBimaneIS	250.05	1779342	1	1	N/A	Internal Standard	445267	1.8	1.81	0.01	M-H	250.05	1	-0.9835	True	N/A	N/A	N/A	Method	N/A	N/A			Pass	Pass	Pass	N/A	Pass	100	5 of 5	N/A	N/A
22	Processed	191107-022	Unknown		False	Plasama 15									Identified	C11H11N3O2S	SCNBimane	248.05	253449	2.928	N/A	N/A	Target Compound	72076	1.8	1.8	0.00	M-H	248.05	2.928	-1.0185	True	0.139	1	1820877	Method	N/A	N/A		PPB	Pass	Pass	Fail	N/A	Pass	31.0068	2 of 4	N/A	N/A
22	Processed	191107-022	Unknown		False	Plasama 15									Confirmed	C10[13]CH11N2[15]NO2S	SCNBimaneIS	250.05	1820877	1	1	N/A	Internal Standard	457655	1.8	1.8	0.00	M-H	250.05	1	-1.1665	True	N/A	N/A	N/A	Method	N/A	N/A			Pass	Pass	Pass	N/A	Pass	100	5 of 5	N/A	N/A
23	Processed	191107-023	Unknown		False	Plasama 16									Identified	C11H11N3O2S	SCNBimane	248.05	1695491	17.888	N/A	N/A	Target Compound	454192	1.8	1.8	0.00	M-H	248.05	17.888	-1.3261	True	0.998	1	1699389	Method	N/A	N/A		PPB	Pass	Pass	Fail	N/A	Pass	57.7113	4 of 6	N/A	N/A
23	Processed	191107-023	Unknown		False	Plasama 16									Confirmed	C10[13]CH11N2[15]NO2S	SCNBimaneIS	250.05	1699389	1	1	N/A	Internal Standard	421094	1.8	1.8	0.00	M-H	250.05	1	-1.0445	True	N/A	N/A	N/A	Method	N/A	N/A			Pass	Pass	Pass	N/A	Pass	100	5 of 5	N/A	N/A
24	Processed	191107-024	Unknown		False	Plasama 17									Confirmed	C11H11N3O2S	SCNBimane	248.05	637240	6.487	N/A	N/A	Target Compound	179880	1.8	1.8	0.00	M-H	248.05	6.487	-1.08	True	0.343	1	1855451	Method	N/A	N/A		PPB	Pass	Pass	Pass	N/A	Pass	63.0713	3 of 5	N/A	N/A
24	Processed	191107-024	Unknown		False	Plasama 17									Confirmed	C10[13]CH11N2[15]NO2S	SCNBimaneIS	250.05	1855451	1	1	N/A	Internal Standard	473861	1.8	1.8	0.00	M-H	250.05	1	-0.9224	True	N/A	N/A	N/A	Method	N/A	N/A			Pass	Pass	Pass	N/A	Pass	100	5 of 5	N/A	N/A
25	Processed	191107-025	Unknown		False	Plasama 18									Confirmed	C11H11N3O2S	SCNBimane	248.05	5216607	48.922	N/A	N/A	Target Compound	1423722	1.8	1.81	0.01	M-H	248.05	48.922	-1.2646	True	2.779	1	1877386	Method	N/A	N/A		PPB	Pass	Pass	Pass	N/A	Pass	86.3219	4 of 7	N/A	N/A
25	Processed	191107-025	Unknown		False	Plasama 18									Confirmed	C10[13]CH11N2[15]NO2S	SCNBimaneIS	250.05	1877386	1	1	N/A	Internal Standard	475218	1.8	1.81	0.01	M-H	250.05	1	-0.4953	True	N/A	N/A	N/A	Method	N/A	N/A			Pass	Pass	Pass	N/A	Pass	100	5 of 5	N/A	N/A
26	Processed	191107-026	Unknown		False	Plasama 19									Identified	C11H11N3O2S	SCNBimane	248.05	305173	3.236	N/A	N/A	Target Compound	86967	1.8	1.8	0.00	M-H	248.05	3.236	-1.2031	True	0.157	1	1945732	Method	N/A	N/A		PPB	Pass	Pass	Fail	N/A	Pass	35.1936	2 of 4	N/A	N/A
26	Processed	191107-026	Unknown		False	Plasama 19									Confirmed	C10[13]CH11N2[15]NO2S	SCNBimaneIS	250.05	1945732	1	1	N/A	Internal Standard	490255	1.8	1.8	0.00	M-H	250.05	1	-1.1665	True	N/A	N/A	N/A	Method	N/A	N/A			Pass	Pass	Pass	N/A	Pass	100	5 of 5	N/A	N/A
27	Processed	191107-027	Unknown		False	Plasama 20									Confirmed	C11H11N3O2S	SCNBimane	248.05	3109535	30.131	N/A	N/A	Target Compound	837696	1.8	1.8	0.00	M-H	248.05	30.131	-1.3876	True	1.7	1	1828851	Method	N/A	N/A		PPB	Pass	Pass	Pass	N/A	Pass	76.715	3 of 5	N/A	N/A
27	Processed	191107-027	Unknown		False	Plasama 20									Confirmed	C10[13]CH11N2[15]NO2S	SCNBimaneIS	250.05	1828851	1	1	N/A	Internal Standard	455740	1.8	1.8	0.00	M-H	250.05	1	-0.9224	True	N/A	N/A	N/A	Method	N/A	N/A			Pass	Pass	Pass	N/A	Pass	98.1668	4 of 5	N/A	N/A
28	Processed	191107-028	Unknown		False	Gill 01									Confirmed	C11H11N3O2S	SCNBimane	248.05	394155	4.886	N/A	N/A	Target Compound	106997	1.8	1.81	0.01	M-H	248.05	4.886	-1.08	True	0.252	1	1567056	Method	N/A	N/A		PPB	Pass	Pass	Pass	N/A	Pass	63.1303	3 of 6	N/A	N/A
28	Processed	191107-028	Unknown		False	Gill 01									Confirmed	C10[13]CH11N2[15]NO2S	SCNBimaneIS	250.05	1567056	1	1	N/A	Internal Standard	398469	1.8	1.81	0.01	M-H	250.05	1	-1.1665	True	N/A	N/A	N/A	Method	N/A	N/A			Pass	Pass	Pass	N/A	Pass	95.9285	4 of 5	N/A	N/A
29	Processed	191107-029	Unknown		False	Gill 02									Confirmed	C11H11N3O2S	SCNBimane	248.05	313893	4.072	N/A	N/A	Target Compound	86386	1.8	1.81	0.01	M-H	248.05	4.072	-1.3261	True	0.205	1	1532572	Method	N/A	N/A		PPB	Pass	Pass	Pass	N/A	Pass	60.7028	3 of 5	N/A	N/A
29	Processed	191107-029	Unknown		False	Gill 02									Confirmed	C10[13]CH11N2[15]NO2S	SCNBimaneIS	250.05	1532572	1	1	N/A	Internal Standard	396204	1.8	1.81	0.01	M-H	250.05	1	-1.1055	True	N/A	N/A	N/A	Method	N/A	N/A			Pass	Pass	Pass	N/A	Pass	100	5 of 5	N/A	N/A
30	Processed	191107-030	Unknown		False	Gill 03									Confirmed	C11H11N3O2S	SCNBimane	248.05	477008	6.284	N/A	N/A	Target Compound	131803	1.8	1.81	0.01	M-H	248.05	6.284	-1.3876	True	0.332	1	1437831	Method	N/A	N/A		PPB	Pass	Pass	Pass	N/A	Pass	60.4226	4 of 6	N/A	N/A
30	Processed	191107-030	Unknown		False	Gill 03									Confirmed	C10[13]CH11N2[15]NO2S	SCNBimaneIS	250.05	1437831	1	1	N/A	Internal Standard	374479	1.8	1.81	0.01	M-H	250.05	1	-1.2886	True	N/A	N/A	N/A	Method	N/A	N/A			Pass	Pass	Pass	N/A	Pass	100	5 of 5	N/A	N/A
31	Processed	191107-031	Unknown		False	Gill 04									Confirmed	C11H11N3O2S	SCNBimane	248.05	250744	3.139	N/A	N/A	Target Compound	70990	1.8	1.81	0.01	M-H	248.05	3.139	-1.2031	True	0.151	1	1657344	Method	N/A	N/A		PPB	Pass	Pass	Pass	N/A	Pass	60.5313	2 of 4	N/A	N/A
31	Processed	191107-031	Unknown		False	Gill 04									Confirmed	C10[13]CH11N2[15]NO2S	SCNBimaneIS	250.05	1657344	1	1	N/A	Internal Standard	418445	1.8	1.81	0.01	M-H	250.05	1	-1.1665	True	N/A	N/A	N/A	Method	N/A	N/A			Pass	Pass	Pass	N/A	Pass	100	5 of 5	N/A	N/A
32	Processed	191107-032	Unknown		False	Gill 05									Confirmed	C11H11N3O2S	SCNBimane	248.05	387953	4.541	N/A	N/A	Target Compound	104791	1.8	1.8	0.00	M-H	248.05	4.541	-1.3261	True	0.232	1	1673866	Method	N/A	N/A		PPB	Pass	Pass	Pass	N/A	Pass	60.0329	3 of 6	N/A	N/A
32	Processed	191107-032	Unknown		False	Gill 05									Confirmed	C10[13]CH11N2[15]NO2S	SCNBimaneIS	250.05	1673866	1	1	N/A	Internal Standard	427482	1.8	1.8	0.00	M-H	250.05	1	-1.2275	True	N/A	N/A	N/A	Method	N/A	N/A			Pass	Pass	Pass	N/A	Pass	100	5 of 5	N/A	N/A
33	Processed	191107-033	Unknown		False	Gill 06									Confirmed	C11H11N3O2S	SCNBimane	248.05	608363	6.669	N/A	N/A	Target Compound	169710	1.8	1.8	0.00	M-H	248.05	6.669	-1.2646	True	0.354	1	1719214	Method	N/A	N/A		PPB	Pass	Pass	Pass	N/A	Pass	60.0441	3 of 5	N/A	N/A
33	Processed	191107-033	Unknown		False	Gill 06									Confirmed	C10[13]CH11N2[15]NO2S	SCNBimaneIS	250.05	1719214	1	1	N/A	Internal Standard	439714	1.8	1.8	0.00	M-H	250.05	1	-1.1665	True	N/A	N/A	N/A	Method	N/A	N/A			Pass	Pass	Pass	N/A	Pass	100	5 of 5	N/A	N/A
34	Processed	191107-034	Unknown		False	Gill 07									Identified	C11H11N3O2S	SCNBimane	248.05	952184	10.829	N/A	N/A	Target Compound	257294	1.8	1.8	0.00	M-H	248.049	10.829	-1.5106	True	0.593	1	1606734	Method	N/A	N/A		PPB	Pass	Pass	Fail	N/A	Pass	57.3833	3 of 5	N/A	N/A
34	Processed	191107-034	Unknown		False	Gill 07									Confirmed	C10[13]CH11N2[15]NO2S	SCNBimaneIS	250.05	1606734	1	1	N/A	Internal Standard	407459	1.8	1.8	0.00	M-H	250.05	1	-1.3496	True	N/A	N/A	N/A	Method	N/A	N/A			Pass	Pass	Pass	N/A	Pass	100	5 of 5	N/A	N/A
35	Processed	191107-035	Unknown		False	Gill 08									Identified	C11H11N3O2S	SCNBimane	248.05	914107	10.646	N/A	N/A	Target Compound	253520	1.8	1.81	0.01	M-H	248.05	10.646	-1.3876	True	0.582	1	1570313	Method	N/A	N/A		PPB	Pass	Pass	Fail	N/A	Pass	57.5856	3 of 5	N/A	N/A
35	Processed	191107-035	Unknown		False	Gill 08									Confirmed	C10[13]CH11N2[15]NO2S	SCNBimaneIS	250.05	1570313	1	1	N/A	Internal Standard	403866	1.8	1.81	0.01	M-H	250.05	1	-1.2275	True	N/A	N/A	N/A	Method	N/A	N/A			Pass	Pass	Pass	N/A	Pass	100	5 of 5	N/A	N/A
36	Processed	191107-036	Unknown		False	Gill 09									Confirmed	C11H11N3O2S	SCNBimane	248.05	220992	2.969	N/A	N/A	Target Compound	62808	1.8	1.8	0.00	M-H	248.05	2.969	-1.2031	True	0.142	1	1561626	Method	N/A	N/A		PPB	Pass	Pass	Pass	N/A	Pass	66.8802	2 of 3	N/A	N/A
36	Processed	191107-036	Unknown		False	Gill 09									Confirmed	C10[13]CH11N2[15]NO2S	SCNBimaneIS	250.05	1561626	1	1	N/A	Internal Standard	407030	1.8	1.8	0.00	M-H	250.05	1	-1.3496	True	N/A	N/A	N/A	Method	N/A	N/A			Pass	Pass	Pass	N/A	Pass	100	5 of 5	N/A	N/A
37	Processed	191107-037	Unknown		False	Gill 10									Confirmed	C11H11N3O2S	SCNBimane	248.05	700561	7.142	N/A	N/A	Target Compound	193548	1.8	1.8	0.00	M-H	248.05	7.142	-1.3261	True	0.381	1	1838628	Method	N/A	N/A		PPB	Pass	Pass	Pass	N/A	Pass	60.0522	3 of 5	N/A	N/A
37	Processed	191107-037	Unknown		False	Gill 10									Confirmed	C10[13]CH11N2[15]NO2S	SCNBimaneIS	250.05	1838628	1	1	N/A	Internal Standard	479161	1.8	1.8	0.00	M-H	250.05	1	-1.3496	True	N/A	N/A	N/A	Method	N/A	N/A			Pass	Pass	Pass	N/A	Pass	100	5 of 5	N/A	N/A
38	Processed	191107-038	Unknown		False	Gill 11									Identified	C11H11N3O2S	SCNBimane	248.05	516894	6.694	N/A	N/A	Target Compound	146551	1.8	1.81	0.01	M-H	248.05	6.694	-1.3876	True	0.355	1	1454818	Method	N/A	N/A		PPB	Pass	Pass	Fail	N/A	Pass	51.3787	3 of 5	N/A	N/A
38	Processed	191107-038	Unknown		False	Gill 11									Confirmed	C10[13]CH11N2[15]NO2S	SCNBimaneIS	250.05	1454818	1	1	N/A	Internal Standard	375682	1.8	1.81	0.01	M-H	250.05	1	-1.4106	True	N/A	N/A	N/A	Method	N/A	N/A			Pass	Pass	Pass	N/A	Pass	100	5 of 5	N/A	N/A
39	Processed	191107-039	Unknown		False	Gill 12									Confirmed	C11H11N3O2S	SCNBimane	248.05	454467	5.111	N/A	N/A	Target Compound	126973	1.8	1.81	0.01	M-H	248.049	5.111	-1.6337	True	0.264	1	1718631	Method	N/A	N/A		PPB	Pass	Pass	Pass	N/A	Pass	61.9629	2 of 5	N/A	N/A
39	Processed	191107-039	Unknown		False	Gill 12									Confirmed	C10[13]CH11N2[15]NO2S	SCNBimaneIS	250.05	1718631	1	1	N/A	Internal Standard	433285	1.8	1.81	0.01	M-H	250.05	1	-1.5937	True	N/A	N/A	N/A	Method	N/A	N/A			Pass	Pass	Pass	N/A	Pass	100	5 of 5	N/A	N/A
40	Processed	191107-040	Unknown		False	Gill 13									Identified	C11H11N3O2S	SCNBimane	248.05	973680	10.581	N/A	N/A	Target Compound	264819	1.8	1.8	0.00	M-H	248.049	10.581	-1.5721	True	0.578	1	1683434	Method	N/A	N/A		PPB	Pass	Pass	Fail	N/A	Pass	57.3723	3 of 5	N/A	N/A
40	Processed	191107-040	Unknown		False	Gill 13									Confirmed	C10[13]CH11N2[15]NO2S	SCNBimaneIS	250.05	1683434	1	1	N/A	Internal Standard	431298	1.8	1.8	0.00	M-H	250.05	1	-1.3496	True	N/A	N/A	N/A	Method	N/A	N/A			Pass	Pass	Pass	N/A	Pass	100	5 of 5	N/A	N/A
41	Processed	191107-041	Unknown		False	Gill 14									Confirmed	C11H11N3O2S	SCNBimane	248.05	2797083	27.147	N/A	N/A	Target Compound	768301	1.8	1.8	0.00	M-H	248.049	27.147	-1.7567	True	1.529	1	1829304	Method	N/A	N/A		PPB	Pass	Pass	Pass	N/A	Pass	72.6021	3 of 5	N/A	N/A
41	Processed	191107-041	Unknown		False	Gill 14									Confirmed	C10[13]CH11N2[15]NO2S	SCNBimaneIS	250.05	1829304	1	1	N/A	Internal Standard	479476	1.8	1.8	0.00	M-H	250.05	1	-1.3496	True	N/A	N/A	N/A	Method	N/A	N/A			Pass	Pass	Pass	N/A	Pass	100	5 of 5	N/A	N/A
42	Processed	191107-042	Unknown		False	Gill 15									Confirmed	C11H11N3O2S	SCNBimane	248.05	821608	8.678	N/A	N/A	Target Compound	222382	1.8	1.8	0.00	M-H	248.05	8.678	-1.3261	True	0.469	1	1751259	Method	N/A	N/A		PPB	Pass	Pass	Pass	N/A	Pass	60.1029	3 of 5	N/A	N/A
42	Processed	191107-042	Unknown		False	Gill 15									Confirmed	C10[13]CH11N2[15]NO2S	SCNBimaneIS	250.05	1751259	1	1	N/A	Internal Standard	442122	1.8	1.8	0.00	M-H	250.05	1	-1.2275	True	N/A	N/A	N/A	Method	N/A	N/A			Pass	Pass	Pass	N/A	Pass	100	5 of 5	N/A	N/A
43	Processed	191107-043	Unknown		False	Gill 16									Identified	C11H11N3O2S	SCNBimane	248.05	1846981	18.869	N/A	N/A	Target Compound	517174	1.8	1.8	0.00	M-H	248.049	18.869	-1.6337	True	1.054	1	1752363	Method	N/A	N/A		PPB	Pass	Pass	Fail	N/A	Pass	58.3984	3 of 5	N/A	N/A
43	Processed	191107-043	Unknown		False	Gill 16									Confirmed	C10[13]CH11N2[15]NO2S	SCNBimaneIS	250.05	1752363	1	1	N/A	Internal Standard	448857	1.8	1.8	0.00	M-H	250.05	1	-1.2275	True	N/A	N/A	N/A	Method	N/A	N/A			Pass	Pass	Pass	N/A	Pass	100	5 of 5	N/A	N/A
44	Processed	191107-044	Unknown		False	Gill 17									Identified	C11H11N3O2S	SCNBimane	248.05	1640875	16.323	N/A	N/A	Target Compound	457608	1.8	1.8	0.00	M-H	248.049	16.323	-1.6337	True	0.908	1	1807374	Method	N/A	N/A		PPB	Pass	Pass	Fail	N/A	Pass	51.0557	3 of 5	N/A	N/A
44	Processed	191107-044	Unknown		False	Gill 17									Confirmed	C10[13]CH11N2[15]NO2S	SCNBimaneIS	250.05	1807374	1	1	N/A	Internal Standard	465345	1.8	1.8	0.00	M-H	250.05	1	-1.3496	True	N/A	N/A	N/A	Method	N/A	N/A			Pass	Pass	Pass	N/A	Pass	100	5 of 5	N/A	N/A
45	Processed	191107-045	Unknown		False	Gill 18									Confirmed	C11H11N3O2S	SCNBimane	248.05	2904245	28.324	N/A	N/A	Target Compound	798434	1.8	1.8	0.00	M-H	248.05	28.324	-1.4491	True	1.597	1	1819014	Method	N/A	N/A		PPB	Pass	Pass	Pass	N/A	Pass	73.8933	3 of 5	N/A	N/A
45	Processed	191107-045	Unknown		False	Gill 18									Confirmed	C10[13]CH11N2[15]NO2S	SCNBimaneIS	250.05	1819014	1	1	N/A	Internal Standard	472182	1.8	1.8	0.00	M-H	250.05	1	-1.0445	True	N/A	N/A	N/A	Method	N/A	N/A			Pass	Pass	Pass	N/A	Pass	100	5 of 5	N/A	N/A
46	Processed	191107-046	Unknown		False	Gill 19									Identified	C11H11N3O2S	SCNBimane	248.05	961194	10.447	N/A	N/A	Target Compound	265727	1.8	1.81	0.01	M-H	248.049	10.447	-1.6952	True	0.571	1	1684341	Method	N/A	N/A		PPB	Pass	Pass	Fail	N/A	Pass	57.2981	3 of 5	N/A	N/A
46	Processed	191107-046	Unknown		False	Gill 19									Confirmed	C10[13]CH11N2[15]NO2S	SCNBimaneIS	250.05	1684341	1	1	N/A	Internal Standard	428822	1.8	1.81	0.01	M-H	250.05	1	-1.4716	True	N/A	N/A	N/A	Method	N/A	N/A			Pass	Pass	Pass	N/A	Pass	100	5 of 5	N/A	N/A
47	Processed	191107-047	Unknown		False	Gill 20									Confirmed	C11H11N3O2S	SCNBimane	248.05	2317781	23.399	N/A	N/A	Target Compound	627476	1.8	1.8	0.00	M-H	248.049	23.399	-1.5721	True	1.314	1	1763956	Method	N/A	N/A		PPB	Pass	Pass	Pass	N/A	Pass	67.7934	3 of 5	N/A	N/A
47	Processed	191107-047	Unknown		False	Gill 20									Confirmed	C10[13]CH11N2[15]NO2S	SCNBimaneIS	250.05	1763956	1	1	N/A	Internal Standard	446407	1.8	1.8	0.00	M-H	250.05	1	-1.0445	True	N/A	N/A	N/A	Method	N/A	N/A			Pass	Pass	Pass	N/A	Pass	100	5 of 5	N/A	N/A
48	Processed	191107-048	Unknown		False	Liver 01									Identified	C11H11N3O2S	SCNBimane	248.05	745836	7.549	N/A	N/A	Target Compound	206239	1.8	1.81	0.01	M-H	248.049	7.549	-1.5106	True	0.404	1	1844443	Method	N/A	N/A		PPB	Pass	Pass	Fail	N/A	Pass	55.8012	3 of 5	N/A	N/A
48	Processed	191107-048	Unknown		False	Liver 01									Confirmed	C10[13]CH11N2[15]NO2S	SCNBimaneIS	250.05	1844443	1	1	N/A	Internal Standard	460193	1.8	1.81	0.01	M-H	250.05	1	-1.4106	True	N/A	N/A	N/A	Method	N/A	N/A			Pass	Pass	Pass	N/A	Pass	100	5 of 5	N/A	N/A
49	Processed	191107-049	Unknown		False	Liver 02									Confirmed	C11H11N3O2S	SCNBimane	248.05	635116	6.9	N/A	N/A	Target Compound	169041	1.8	1.8	0.00	M-H	248.05	6.9	-1.3876	True	0.367	1	1729905	Method	N/A	N/A		PPB	Pass	Pass	Pass	N/A	Pass	79.9599	4 of 6	N/A	N/A
49	Processed	191107-049	Unknown		False	Liver 02									Confirmed	C10[13]CH11N2[15]NO2S	SCNBimaneIS	250.05	1729905	1	1	N/A	Internal Standard	426988	1.8	1.8	0.00	M-H	250.05	1	-1.3496	True	N/A	N/A	N/A	Method	N/A	N/A			Pass	Pass	Pass	N/A	Pass	100	5 of 5	N/A	N/A
50	Processed	191107-050	Unknown		False	Liver 03									Confirmed	C11H11N3O2S	SCNBimane	248.05	315727	3.538	N/A	N/A	Target Compound	90364	1.8	1.8	0.00	M-H	248.049	3.538	-1.6337	True	0.174	1	1812814	Method	N/A	N/A		PPB	Pass	Pass	Pass	N/A	Pass	62.089	2 of 5	N/A	N/A
50	Processed	191107-050	Unknown		False	Liver 03									Confirmed	C10[13]CH11N2[15]NO2S	SCNBimaneIS	250.05	1812814	1	1	N/A	Internal Standard	451804	1.8	1.8	0.00	M-H	250.05	1	-1.5327	True	N/A	N/A	N/A	Method	N/A	N/A			Pass	Pass	Pass	N/A	Pass	100	5 of 5	N/A	N/A
51	Processed	191107-051	Unknown		False	Liver 04									Confirmed	C11H11N3O2S	SCNBimane	248.05	415400	4.773	N/A	N/A	Target Compound	112092	1.8	1.81	0.01	M-H	248.049	4.773	-1.6952	True	0.245	1	1695281	Method	N/A	N/A		PPB	Pass	Pass	Pass	N/A	Pass	62.6271	2 of 5	N/A	N/A
51	Processed	191107-051	Unknown		False	Liver 04									Confirmed	C10[13]CH11N2[15]NO2S	SCNBimaneIS	250.05	1695281	1	1	N/A	Internal Standard	418156	1.8	1.81	0.01	M-H	250.05	1	-1.6547	True	N/A	N/A	N/A	Method	N/A	N/A			Pass	Pass	Pass	N/A	Pass	100	5 of 5	N/A	N/A
52	Processed	191107-052	Unknown		False	Liver 05									Confirmed	C11H11N3O2S	SCNBimane	248.05	499886	5.976	N/A	N/A	Target Compound	135712	1.8	1.79	-0.01	M-H	248.049	5.976	-1.7567	True	0.314	1	1591641	Method	N/A	N/A		PPB	Pass	Pass	Pass	N/A	Pass	62.8334	2 of 5	N/A	N/A
52	Processed	191107-052	Unknown		False	Liver 05									Confirmed	C10[13]CH11N2[15]NO2S	SCNBimaneIS	250.05	1591641	1	1	N/A	Internal Standard	393833	1.8	1.8	0.00	M-H	250.05	1	-1.5937	True	N/A	N/A	N/A	Method	N/A	N/A			Pass	Pass	Pass	N/A	Pass	100	5 of 5	N/A	N/A
53	Processed	191107-053	Unknown		False	Liver 06									Confirmed	C11H11N3O2S	SCNBimane	248.05	1291295	12.757	N/A	N/A	Target Compound	352291	1.8	1.81	0.01	M-H	248.049	12.757	-1.6337	True	0.703	1	1836207	Method	N/A	N/A		PPB	Pass	Pass	Pass	N/A	Pass	60.4197	3 of 5	N/A	N/A
53	Processed	191107-053	Unknown		False	Liver 06									Confirmed	C10[13]CH11N2[15]NO2S	SCNBimaneIS	250.05	1836207	1	1	N/A	Internal Standard	456329	1.8	1.81	0.01	M-H	250.05	1	-1.3496	True	N/A	N/A	N/A	Method	N/A	N/A			Pass	Pass	Pass	N/A	Pass	100	5 of 5	N/A	N/A
54	Processed	191107-054	Unknown		False	Liver 07									Identified	C11H11N3O2S	SCNBimane	248.05	1266702	13.961	N/A	N/A	Target Compound	352471	1.8	1.81	0.01	M-H	248.049	13.961	-1.8797	True	0.772	1	1640117	Method	N/A	N/A		PPB	Pass	Pass	Fail	N/A	Pass	45.2963	3 of 5	N/A	N/A
54	Processed	191107-054	Unknown		False	Liver 07									Confirmed	C10[13]CH11N2[15]NO2S	SCNBimaneIS	250.05	1640117	1	1	N/A	Internal Standard	402676	1.8	1.81	0.01	M-H	250.05	1	-1.5327	True	N/A	N/A	N/A	Method	N/A	N/A			Pass	Pass	Pass	N/A	Pass	100	5 of 5	N/A	N/A
55	Processed	191107-055	Unknown		False	Liver 08									Identified	C11H11N3O2S	SCNBimane	248.05	798277	8.323	N/A	N/A	Target Compound	218279	1.8	1.81	0.01	M-H	248.049	8.323	-1.5106	True	0.449	1	1778845	Method	N/A	N/A		PPB	Pass	Pass	Fail	N/A	Pass	57.078	3 of 5	N/A	N/A
55	Processed	191107-055	Unknown		False	Liver 08									Confirmed	C10[13]CH11N2[15]NO2S	SCNBimaneIS	250.05	1778845	1	1	N/A	Internal Standard	441390	1.8	1.81	0.01	M-H	250.05	1	-1.4106	True	N/A	N/A	N/A	Method	N/A	N/A			Pass	Pass	Pass	N/A	Pass	100	5 of 5	N/A	N/A
56	Processed	191107-056	Unknown		False	Liver 09									Confirmed	C11H11N3O2S	SCNBimane	248.05	197927	2.268	N/A	N/A	Target Compound	53840	1.8	1.81	0.01	M-H	248.049	2.268	-1.7567	True	0.101	1	1954279	Method	N/A	N/A		PPB	Pass	Pass	Pass	N/A	Pass	63.0309	2 of 4	N/A	N/A
56	Processed	191107-056	Unknown		False	Liver 09									Confirmed	C10[13]CH11N2[15]NO2S	SCNBimaneIS	250.05	1954279	1	1	N/A	Internal Standard	478342	1.8	1.8	0.00	M-H	250.05	1	-1.5327	True	N/A	N/A	N/A	Method	N/A	N/A			Pass	Pass	Pass	N/A	Pass	100	5 of 5	N/A	N/A
57	Processed	191107-057	Unknown		False	Liver 10									Identified	C11H11N3O2S	SCNBimane	248.05	1642872	15.926	N/A	N/A	Target Compound	446721	1.8	1.8	0.00	M-H	248.049	15.926	-1.8797	True	0.885	1	1856146	Method	N/A	N/A		PPB	Pass	Pass	Fail	N/A	Pass	50.0134	3 of 5	N/A	N/A
57	Processed	191107-057	Unknown		False	Liver 10									Confirmed	C10[13]CH11N2[15]NO2S	SCNBimaneIS	250.05	1856146	1	1	N/A	Internal Standard	463530	1.8	1.8	0.00	M-H	250.05	1	-1.5937	True	N/A	N/A	N/A	Method	N/A	N/A			Pass	Pass	Pass	N/A	Pass	100	5 of 5	N/A	N/A
58	Processed	191107-058	Unknown		False	Liver 11									Confirmed	C11H11N3O2S	SCNBimane	248.05	263700	2.83	N/A	N/A	Target Compound	70942	1.8	1.8	0.00	M-H	248.05	2.83	-1.4491	True	0.134	1	1974368	Method	N/A	N/A		PPB	Pass	Pass	Pass	N/A	Pass	63.2125	2 of 4	N/A	N/A
58	Processed	191107-058	Unknown		False	Liver 11									Confirmed	C10[13]CH11N2[15]NO2S	SCNBimaneIS	250.05	1974368	1	1	N/A	Internal Standard	495349	1.8	1.8	0.00	M-H	250.05	1	-1.4716	True	N/A	N/A	N/A	Method	N/A	N/A			Pass	Pass	Pass	N/A	Pass	100	5 of 5	N/A	N/A
59	Processed	191107-059	Unknown		False	Liver 12									Confirmed	C11H11N3O2S	SCNBimane	248.05	844638	8.824	N/A	N/A	Target Compound	229249	1.8	1.8	0.00	M-H	248.05	8.824	-1.4491	True	0.478	1	1768747	Method	N/A	N/A		PPB	Pass	Pass	Pass	N/A	Pass	79.3674	3 of 5	N/A	N/A
59	Processed	191107-059	Unknown		False	Liver 12									Confirmed	C10[13]CH11N2[15]NO2S	SCNBimaneIS	250.05	1768747	1	1	N/A	Internal Standard	433530	1.8	1.8	0.00	M-H	250.05	1	-1.2886	True	N/A	N/A	N/A	Method	N/A	N/A			Pass	Pass	Pass	N/A	Pass	100	5 of 5	N/A	N/A
60	Processed	191107-060	Unknown		False	Liver 13									Confirmed	C11H11N3O2S	SCNBimane	248.05	2026635	19.296	N/A	N/A	Target Compound	559769	1.8	1.8	0.00	M-H	248.049	19.296	-1.6337	True	1.078	1	1879183	Method	N/A	N/A		PPB	Pass	Pass	Pass	N/A	Pass	60.4315	4 of 6	N/A	N/A
60	Processed	191107-060	Unknown		False	Liver 13									Confirmed	C10[13]CH11N2[15]NO2S	SCNBimaneIS	250.05	1879183	1	1	N/A	Internal Standard	469223	1.8	1.8	0.00	M-H	250.05	1	-1.2275	True	N/A	N/A	N/A	Method	N/A	N/A			Pass	Pass	Pass	N/A	Pass	100	5 of 5	N/A	N/A
61	Processed	191107-061	Unknown		False	Liver 14									Confirmed	C11H11N3O2S	SCNBimane	248.05	1365606	12.889	N/A	N/A	Target Compound	374938	1.8	1.8	0.00	M-H	248.05	12.889	-1.3876	True	0.711	1	1921238	Method	N/A	N/A		PPB	Pass	Pass	Pass	N/A	Pass	60.5548	3 of 5	N/A	N/A
61	Processed	191107-061	Unknown		False	Liver 14									Confirmed	C10[13]CH11N2[15]NO2S	SCNBimaneIS	250.05	1921238	1	1	N/A	Internal Standard	484582	1.8	1.8	0.00	M-H	250.05	1	-1.1055	True	N/A	N/A	N/A	Method	N/A	N/A			Pass	Pass	Pass	N/A	Pass	100	5 of 5	N/A	N/A
62	Processed	191107-062	Unknown		False	Liver 15									Identified	C11H11N3O2S	SCNBimane	248.05	1777228	18.497	N/A	N/A	Target Compound	473842	1.8	1.79	-0.01	M-H	248.05	18.497	-1.3876	True	1.033	1	1721097	Method	N/A	N/A		PPB	Pass	Pass	Fail	N/A	Pass	58.3021	3 of 5	N/A	N/A
62	Processed	191107-062	Unknown		False	Liver 15									Confirmed	C10[13]CH11N2[15]NO2S	SCNBimaneIS	250.05	1721097	1	1	N/A	Internal Standard	423906	1.8	1.8	0.00	M-H	250.05	1	-1.1055	True	N/A	N/A	N/A	Method	N/A	N/A			Pass	Pass	Pass	N/A	Pass	100	5 of 5	N/A	N/A
63	Processed	191107-063	Unknown		False	Liver 16									Confirmed	C11H11N3O2S	SCNBimane	248.05	3158231	31.088	N/A	N/A	Target Compound	856794	1.8	1.8	0.00	M-H	248.049	31.088	-1.5106	True	1.755	1	1799352	Method	N/A	N/A		PPB	Pass	Pass	Pass	N/A	Pass	77.5483	4 of 6	N/A	N/A
63	Processed	191107-063	Unknown		False	Liver 16									Confirmed	C10[13]CH11N2[15]NO2S	SCNBimaneIS	250.05	1799352	1	1	N/A	Internal Standard	443246	1.8	1.8	0.00	M-H	250.05	1	-0.9835	True	N/A	N/A	N/A	Method	N/A	N/A			Pass	Pass	Pass	N/A	Pass	100	5 of 5	N/A	N/A
64	Processed	191107-064	Unknown		False	Liver 17									Confirmed	C11H11N3O2S	SCNBimane	248.05	3044465	33.334	N/A	N/A	Target Compound	828807	1.8	1.8	0.00	M-H	248.049	33.334	-1.5106	True	1.884	1	1615883	Method	N/A	N/A		PPB	Pass	Pass	Pass	N/A	Pass	79.3261	4 of 6	N/A	N/A
64	Processed	191107-064	Unknown		False	Liver 17									Confirmed	C10[13]CH11N2[15]NO2S	SCNBimaneIS	250.05	1615883	1	1	N/A	Internal Standard	401194	1.8	1.8	0.00	M-H	250.05	1	-0.9835	True	N/A	N/A	N/A	Method	N/A	N/A			Pass	Pass	Pass	N/A	Pass	100	5 of 5	N/A	N/A
65	Processed	191107-065	Unknown		False	Liver 18									Confirmed	C11H11N3O2S	SCNBimane	248.05	4875935	45.037	N/A	N/A	Target Compound	1334958	1.8	1.8	0.00	M-H	248.049	45.037	-1.7567	True	2.556	1	1907875	Method	N/A	N/A		PPB	Pass	Pass	Pass	N/A	Pass	84.6087	5 of 8	N/A	N/A
65	Processed	191107-065	Unknown		False	Liver 18									Confirmed	C10[13]CH11N2[15]NO2S	SCNBimaneIS	250.05	1907875	1	1	N/A	Internal Standard	479366	1.8	1.8	0.00	M-H	250.05	1	-1.0445	True	N/A	N/A	N/A	Method	N/A	N/A			Pass	Pass	Pass	N/A	Pass	100	5 of 5	N/A	N/A
66	Processed	191107-066	Unknown		False	Liver 19									Identified	C11H11N3O2S	SCNBimane	248.05	975611	10.035	N/A	N/A	Target Compound	260949	1.8	1.8	0.00	M-H	248.049	10.035	-1.8797	True	0.547	1	1783465	Method	N/A	N/A		PPB	Pass	Pass	Fail	N/A	Pass	58.6097	3 of 5	N/A	N/A
66	Processed	191107-066	Unknown		False	Liver 19									Confirmed	C10[13]CH11N2[15]NO2S	SCNBimaneIS	250.05	1783465	1	1	N/A	Internal Standard	436176	1.8	1.8	0.00	M-H	250.05	1	-1.7157	True	N/A	N/A	N/A	Method	N/A	N/A			Pass	Pass	Pass	N/A	Pass	100	5 of 5	N/A	N/A
67	Processed	191107-067	Unknown		False	Liver 20									Confirmed	C11H11N3O2S	SCNBimane	248.05	3908341	37.964	N/A	N/A	Target Compound	1037251	1.8	1.8	0.00	M-H	248.049	37.964	-2.0643	True	2.15	1	1818024	Method	N/A	N/A		PPB	Pass	Pass	Pass	N/A	Pass	81.5337	4 of 7	N/A	N/A
67	Processed	191107-067	Unknown		False	Liver 20									Confirmed	C10[13]CH11N2[15]NO2S	SCNBimaneIS	250.05	1818024	1	1	N/A	Internal Standard	442939	1.8	1.8	0.00	M-H	250.05	1	-1.4106	True	N/A	N/A	N/A	Method	N/A	N/A			Pass	Pass	Pass	N/A	Pass	100	5 of 5	N/A	N/A
68	Processed	191107-068	Unknown		False	Tissue 01									Confirmed	C11H11N3O2S	SCNBimane	248.05	222355	2.489	N/A	N/A	Target Compound	62342	1.8	1.79	-0.01	M-H	248.049	2.489	-2.0028	True	0.114	1	1950446	Method	N/A	N/A		PPB	Pass	Pass	Pass	N/A	Pass	62.8364	3 of 5	N/A	N/A
68	Processed	191107-068	Unknown		False	Tissue 01									Confirmed	C10[13]CH11N2[15]NO2S	SCNBimaneIS	250.05	1950446	1	1	N/A	Internal Standard	480305	1.8	1.79	-0.01	M-H	250.05	1	-2.0208	True	N/A	N/A	N/A	Method	N/A	N/A			Pass	Pass	Pass	N/A	Pass	100	5 of 5	N/A	N/A
69	Processed	191107-069	Unknown		False	Tissue 02									Confirmed	C11H11N3O2S	SCNBimane	248.05	109649	1.398	N/A	N/A	Target Compound	29897	1.8	1.8	0.00	M-H	248.049	1.398	-1.5106	True	0.051	1	2133646	Method	N/A	N/A		PPB	Pass	Pass	Pass	N/A	Pass	65.8115	2 of 3	N/A	N/A
69	Processed	191107-069	Unknown		False	Tissue 02									Confirmed	C10[13]CH11N2[15]NO2S	SCNBimaneIS	250.05	2133646	1	1	N/A	Internal Standard	518055	1.8	1.8	0.00	M-H	250.05	1	-1.6547	True	N/A	N/A	N/A	Method	N/A	N/A			Pass	Pass	Pass	N/A	Pass	100	5 of 5	N/A	N/A
70	Processed	191107-070	Unknown		False	Tissue 03									Confirmed	C11H11N3O2S	SCNBimane	248.05	98814	1.359	N/A	N/A	Target Compound	27402	1.8	1.8	0.00	M-H	248.049	1.359	-1.6952	True	0.049	1	2011384	Method	N/A	N/A		PPB	Pass	Pass	Pass	N/A	Pass	65.6649	3 of 4	N/A	N/A
70	Processed	191107-070	Unknown		False	Tissue 03									Confirmed	C10[13]CH11N2[15]NO2S	SCNBimaneIS	250.05	2011384	1	1	N/A	Internal Standard	489695	1.8	1.8	0.00	M-H	250.05	1	-1.5937	True	N/A	N/A	N/A	Method	N/A	N/A			Pass	Pass	Pass	N/A	Pass	100	5 of 5	N/A	N/A
71	Processed	191107-071	Unknown		False	Tissue 04									Confirmed	C11H11N3O2S	SCNBimane	248.05	112907	1.506	N/A	N/A	Target Compound	30548	1.8	1.79	-0.01	M-H	248.049	1.506	-1.7567	True	0.058	1	1961554	Method	N/A	N/A		PPB	Pass	Pass	Pass	N/A	Pass	64.9883	2 of 3	N/A	N/A
71	Processed	191107-071	Unknown		False	Tissue 04									Confirmed	C10[13]CH11N2[15]NO2S	SCNBimaneIS	250.05	1961554	1	1	N/A	Internal Standard	477867	1.8	1.8	0.00	M-H	250.05	1	-2.0819	True	N/A	N/A	N/A	Method	N/A	N/A			Pass	Pass	Pass	N/A	Pass	100	5 of 5	N/A	N/A
72	Processed	191107-072	Unknown		False	Tissue 05									Confirmed	C11H11N3O2S	SCNBimane	248.05	111660	1.545	N/A	N/A	Target Compound	29654	1.8	1.8	0.00	M-H	248.049	1.545	-2.1258	True	0.06	1	1867103	Method	N/A	N/A		PPB	Pass	Pass	Pass	N/A	Pass	87.2008	2 of 3	N/A	N/A
72	Processed	191107-072	Unknown		False	Tissue 05									Confirmed	C10[13]CH11N2[15]NO2S	SCNBimaneIS	250.05	1867103	1	1	N/A	Internal Standard	453171	1.8	1.8	0.00	M-H	250.05	1	-2.0208	True	N/A	N/A	N/A	Method	N/A	N/A			Pass	Pass	Pass	N/A	Pass	100	5 of 5	N/A	N/A
73	Processed	191107-073	Unknown		False	Tissue 06									Identified	C11H11N3O2S	SCNBimane	248.05	340833	3.369	N/A	N/A	Target Compound	90453	1.8	1.79	-0.01	M-H	248.049	3.369	-1.7567	True	0.165	1	2071930	Method	N/A	N/A		PPB	Pass	Pass	Fail	N/A	Pass	35.2613	3 of 6	N/A	N/A
73	Processed	191107-073	Unknown		False	Tissue 06									Confirmed	C10[13]CH11N2[15]NO2S	SCNBimaneIS	250.05	2071930	1	1	N/A	Internal Standard	507673	1.8	1.8	0.00	M-H	250.05	1	-1.7768	True	N/A	N/A	N/A	Method	N/A	N/A			Pass	Pass	Pass	N/A	Pass	100	5 of 5	N/A	N/A
74	Processed	191107-074	Unknown		False	Tissue 07									Identified	C11H11N3O2S	SCNBimane	248.05	239714	2.434	N/A	N/A	Target Compound	63274	1.8	1.8	0.00	M-H	248.049	2.434	-1.5721	True	0.111	1	2163367	Method	N/A	N/A		PPB	Pass	Pass	Fail	N/A	Pass	20.3673	2 of 4	N/A	N/A
74	Processed	191107-074	Unknown		False	Tissue 07									Confirmed	C10[13]CH11N2[15]NO2S	SCNBimaneIS	250.05	2163367	1	1	N/A	Internal Standard	529673	1.8	1.8	0.00	M-H	250.05	1	-1.5327	True	N/A	N/A	N/A	Method	N/A	N/A			Pass	Pass	Pass	N/A	Pass	100	5 of 5	N/A	N/A
75	Processed	191107-075	Unknown		False	Tissue 08									Identified	C11H11N3O2S	SCNBimane	248.05	192594	2.07	N/A	N/A	Target Compound	51089	1.8	1.8	0.00	M-H	248.049	2.07	-1.6952	True	0.09	1	2141483	Method	N/A	N/A		PPB	Pass	Pass	Fail	N/A	Pass	10.2759	2 of 4	N/A	N/A
75	Processed	191107-075	Unknown		False	Tissue 08									Confirmed	C10[13]CH11N2[15]NO2S	SCNBimaneIS	250.05	2141483	1	1	N/A	Internal Standard	516213	1.8	1.8	0.00	M-H	250.05	1	-1.5937	True	N/A	N/A	N/A	Method	N/A	N/A			Pass	Pass	Pass	N/A	Pass	100	5 of 5	N/A	N/A
76	Processed	191107-076	Unknown		False	Tissue 09									Confirmed	C11H11N3O2S	SCNBimane	248.05	112533	1.402	N/A	N/A	Target Compound	30567	1.8	1.79	-0.01	M-H	248.049	1.402	-1.5106	True	0.052	1	2180628	Method	N/A	N/A		PPB	Pass	Pass	Pass	N/A	Pass	66.1998	3 of 4	N/A	N/A
76	Processed	191107-076	Unknown		False	Tissue 09									Confirmed	C10[13]CH11N2[15]NO2S	SCNBimaneIS	250.05	2180628	1	1	N/A	Internal Standard	533069	1.8	1.79	-0.01	M-H	250.05	1	-1.6547	True	N/A	N/A	N/A	Method	N/A	N/A			Pass	Pass	Pass	N/A	Pass	100	5 of 5	N/A	N/A
77	Processed	191107-077	Unknown		False	Tissue 10									Confirmed	C11H11N3O2S	SCNBimane	248.05	230139	2.478	N/A	N/A	Target Compound	59218	1.8	1.79	-0.01	M-H	248.049	2.478	-1.7567	True	0.113	1	2030474	Method	N/A	N/A		PPB	Pass	Pass	Pass	N/A	Pass	62.8024	2 of 4	N/A	N/A
77	Processed	191107-077	Unknown		False	Tissue 10									Confirmed	C10[13]CH11N2[15]NO2S	SCNBimaneIS	250.05	2030474	1	1	N/A	Internal Standard	492008	1.8	1.79	-0.01	M-H	250.05	1	-1.7157	True	N/A	N/A	N/A	Method	N/A	N/A			Pass	Pass	Pass	N/A	Pass	100	5 of 5	N/A	N/A
78	Processed	191107-078	Unknown		False	Tissue 11									Confirmed	C11H11N3O2S	SCNBimane	248.05	125895	1.553	N/A	N/A	Target Compound	35017	1.8	1.79	-0.01	M-H	248.049	1.553	-1.8797	True	0.06	1	2089095	Method	N/A	N/A		PPB	Pass	Pass	Pass	N/A	Pass	65.6282	2 of 3	N/A	N/A
78	Processed	191107-078	Unknown		False	Tissue 11									Confirmed	C10[13]CH11N2[15]NO2S	SCNBimaneIS	250.05	2089095	1	1	N/A	Internal Standard	505273	1.8	1.79	-0.01	M-H	250.05	1	-1.7768	True	N/A	N/A	N/A	Method	N/A	N/A			Pass	Pass	Pass	N/A	Pass	100	5 of 5	N/A	N/A
79	Processed	191107-079	Unknown		False	Tissue 12									Confirmed	C11H11N3O2S	SCNBimane	248.05	186247	2.006	N/A	N/A	Target Compound	48087	1.8	1.79	-0.01	M-H	248.049	2.006	-1.8797	True	0.086	1	2159162	Method	N/A	N/A		PPB	Pass	Pass	Pass	N/A	Pass	62.6009	2 of 4	N/A	N/A
79	Processed	191107-079	Unknown		False	Tissue 12									Confirmed	C10[13]CH11N2[15]NO2S	SCNBimaneIS	250.05	2159162	1	1	N/A	Internal Standard	529723	1.8	1.79	-0.01	M-H	250.05	1	-1.7768	True	N/A	N/A	N/A	Method	N/A	N/A			Pass	Pass	Pass	N/A	Pass	100	5 of 5	N/A	N/A
80	Processed	191107-080	Unknown		False	Tissue 13									Identified	C11H11N3O2S	SCNBimane	248.05	151030	2.576	N/A	N/A	Target Compound	44306	1.8	1.8	0.00	M-H	248.049	2.576	-2.0643	True	0.119	1	1269071	Method	N/A	N/A		PPB	Pass	Pass	Fail	N/A	Pass	32.3077	2 of 3	N/A	N/A
80	Processed	191107-080	Unknown		False	Tissue 13									Confirmed	C10[13]CH11N2[15]NO2S	SCNBimaneIS	250.05	1269071	1	1	N/A	Internal Standard	338294	1.8	1.8	0.00	M-H	250.05	1	-1.7768	True	N/A	N/A	N/A	Method	N/A	N/A			Pass	Pass	Pass	N/A	Pass	94.8852	4 of 5	N/A	N/A
81	Processed	191107-081	Unknown		False	Tissue 14									Confirmed	C11H11N3O2S	SCNBimane	248.05	546949	4.718	N/A	N/A	Target Compound	143553	1.8	1.8	0.00	M-H	248.049	4.718	-1.7567	True	0.242	1	2261013	Method	N/A	N/A		PPB	Pass	Pass	Pass	N/A	Pass	62.4798	2 of 5	N/A	N/A
81	Processed	191107-081	Unknown		False	Tissue 14									Confirmed	C10[13]CH11N2[15]NO2S	SCNBimaneIS	250.05	2261013	1	1	N/A	Internal Standard	553847	1.8	1.8	0.00	M-H	250.05	1	-1.7157	True	N/A	N/A	N/A	Method	N/A	N/A			Pass	Pass	Pass	N/A	Pass	100	5 of 5	N/A	N/A
82	Processed	191107-082	Unknown		False	Tissue 15									Identified	C11H11N3O2S	SCNBimane	248.05	232620	2.419	N/A	N/A	Target Compound	63343	1.8	1.79	-0.01	M-H	248.049	2.419	-1.5721	True	0.11	1	2115213	Method	N/A	N/A		PPB	Pass	Pass	Fail	N/A	Pass	50.6357	2 of 4	N/A	N/A
82	Processed	191107-082	Unknown		False	Tissue 15									Confirmed	C10[13]CH11N2[15]NO2S	SCNBimaneIS	250.05	2115213	1	1	N/A	Internal Standard	522843	1.8	1.79	-0.01	M-H	250.05	1	-1.5327	True	N/A	N/A	N/A	Method	N/A	N/A			Pass	Pass	Pass	N/A	Pass	100	5 of 5	N/A	N/A
83	Processed	191107-083	Unknown		False	Tissue 16									Confirmed	C11H11N3O2S	SCNBimane	248.05	576938	5.368	N/A	N/A	Target Compound	159800	1.8	1.8	0.00	M-H	248.049	5.368	-1.7567	True	0.279	1	2066417	Method	N/A	N/A		PPB	Pass	Pass	Pass	N/A	Pass	62.6358	2 of 5	N/A	N/A
83	Processed	191107-083	Unknown		False	Tissue 16									Confirmed	C10[13]CH11N2[15]NO2S	SCNBimaneIS	250.05	2066417	1	1	N/A	Internal Standard	509483	1.8	1.8	0.00	M-H	250.05	1	-1.7157	True	N/A	N/A	N/A	Method	N/A	N/A			Pass	Pass	Pass	N/A	Pass	100	5 of 5	N/A	N/A
84	Processed	191107-084	Unknown		False	Tissue 17									Confirmed	C11H11N3O2S	SCNBimane	248.05	640701	5.804	N/A	N/A	Target Compound	173424	1.8	1.79	-0.01	M-H	248.049	5.804	-1.8797	True	0.304	1	2106063	Method	N/A	N/A		PPB	Pass	Pass	Pass	N/A	Pass	62.7534	2 of 5	N/A	N/A
84	Processed	191107-084	Unknown		False	Tissue 17									Confirmed	C10[13]CH11N2[15]NO2S	SCNBimaneIS	250.05	2106063	1	1	N/A	Internal Standard	515411	1.8	1.79	-0.01	M-H	250.05	1	-1.7768	True	N/A	N/A	N/A	Method	N/A	N/A			Pass	Pass	Pass	N/A	Pass	100	5 of 5	N/A	N/A
85	Processed	191107-085	Unknown		False	Tissue 18									Confirmed	C11H11N3O2S	SCNBimane	248.05	1546876	13.205	N/A	N/A	Target Compound	415465	1.8	1.79	-0.01	M-H	248.049	13.205	-1.5721	True	0.729	1	2121997	Method	N/A	N/A		PPB	Pass	Pass	Pass	N/A	Pass	60.8385	3 of 5	N/A	N/A
85	Processed	191107-085	Unknown		False	Tissue 18									Confirmed	C10[13]CH11N2[15]NO2S	SCNBimaneIS	250.05	2121997	1	1	N/A	Internal Standard	519646	1.8	1.79	-0.01	M-H	250.05	1	-1.4106	True	N/A	N/A	N/A	Method	N/A	N/A			Pass	Pass	Pass	N/A	Pass	100	5 of 5	N/A	N/A
86	Processed	191107-086	Unknown		False	Tissue 19									Confirmed	C11H11N3O2S	SCNBimane	248.05	301945	3.009	N/A	N/A	Target Compound	82089	1.8	1.8	0.00	M-H	248.049	3.009	-1.9412	True	0.144	1	2099552	Method	N/A	N/A		PPB	Pass	Pass	Pass	N/A	Pass	63.0878	2 of 4	N/A	N/A
86	Processed	191107-086	Unknown		False	Tissue 19									Confirmed	C10[13]CH11N2[15]NO2S	SCNBimaneIS	250.05	2099552	1	1	N/A	Internal Standard	524599	1.8	1.8	0.00	M-H	250.05	1	-1.8988	True	N/A	N/A	N/A	Method	N/A	N/A			Pass	Pass	Pass	N/A	Pass	100	5 of 5	N/A	N/A
87	Processed	191107-087	Unknown		False	Tissue 20									Confirmed	C11H11N3O2S	SCNBimane	248.05	1373381	12.188	N/A	N/A	Target Compound	370240	1.8	1.79	-0.01	M-H	248.049	12.188	-1.6952	True	0.671	1	2047999	Method	N/A	N/A		PPB	Pass	Pass	Pass	N/A	Pass	60.0529	3 of 5	N/A	N/A
87	Processed	191107-087	Unknown		False	Tissue 20									Confirmed	C10[13]CH11N2[15]NO2S	SCNBimaneIS	250.05	2047999	1	1	N/A	Internal Standard	512063	1.8	1.79	-0.01	M-H	250.05	1	-1.5327	True	N/A	N/A	N/A	Method	N/A	N/A			Pass	Pass	Pass	N/A	Pass	100	5 of 5	N/A	N/A
88	Processed	191107-088	Unknown		False	Plasma 372									Confirmed	C11H11N3O2S	SCNBimane	248.05	311545	2.48	N/A	N/A	Target Compound	84845	1.8	1.79	-0.01	M-H	248.049	2.48	-1.5721	True	0.113	1	2746040	Method	N/A	N/A		PPB	Pass	Pass	Pass	N/A	Pass	60.6491	3 of 6	N/A	N/A
88	Processed	191107-088	Unknown		False	Plasma 372									Confirmed	C10[13]CH11N2[15]NO2S	SCNBimaneIS	250.05	2746040	1	1	N/A	Internal Standard	676553	1.8	1.79	-0.01	M-H	250.05	1	-1.5327	True	N/A	N/A	N/A	Method	N/A	N/A			Pass	Pass	Pass	N/A	Pass	100	5 of 6	N/A	N/A
89	Processed	191107-089	Unknown		False	Plasma 373									Confirmed	C11H11N3O2S	SCNBimane	248.05	3472287	24.032	N/A	N/A	Target Compound	931809	1.8	1.8	0.00	M-H	248.049	24.032	-1.8182	True	1.35	1	2571506	Method	N/A	N/A		PPB	Pass	Pass	Pass	N/A	Pass	68.9696	4 of 7	N/A	N/A
89	Processed	191107-089	Unknown		False	Plasma 373									Confirmed	C10[13]CH11N2[15]NO2S	SCNBimaneIS	250.05	2571506	1	1	N/A	Internal Standard	629821	1.8	1.8	0.00	M-H	250.05	1	-1.3496	True	N/A	N/A	N/A	Method	N/A	N/A			Pass	Pass	Pass	N/A	Pass	100	5 of 5	N/A	N/A
90	Processed	191107-090	Unknown		False	Plasma 374									Identified	C11H11N3O2S	SCNBimane	248.05	904045	6.551	N/A	N/A	Target Compound	244507	1.8	1.8	0.00	M-H	248.049	6.551	-1.8182	True	0.347	1	2604629	Method	N/A	N/A		PPB	Pass	Pass	Fail	N/A	Pass	53.5526	3 of 5	N/A	N/A
90	Processed	191107-090	Unknown		False	Plasma 374									Confirmed	C10[13]CH11N2[15]NO2S	SCNBimaneIS	250.05	2604629	1	1	N/A	Internal Standard	633537	1.8	1.8	0.00	M-H	250.05	1	-1.6547	True	N/A	N/A	N/A	Method	N/A	N/A			Pass	Pass	Pass	N/A	Pass	100	5 of 5	N/A	N/A
91	Processed	191107-091	Unknown		False	Plasma 375									Identified	C11H11N3O2S	SCNBimane	248.05	729499	5.336	N/A	N/A	Target Compound	200619	1.8	1.8	0.00	M-H	248.049	5.336	-1.8797	True	0.277	1	2630233	Method	N/A	N/A		PPB	Pass	Pass	Fail	N/A	Pass	49.4034	2 of 5	N/A	N/A
91	Processed	191107-091	Unknown		False	Plasma 375									Confirmed	C10[13]CH11N2[15]NO2S	SCNBimaneIS	250.05	2630233	1	1	N/A	Internal Standard	659976	1.8	1.8	0.00	M-H	250.05	1	-1.8378	True	N/A	N/A	N/A	Method	N/A	N/A			Pass	Pass	Pass	N/A	Pass	100	5 of 5	N/A	N/A
92	Processed	191107-092	Unknown		False	Plasma 397									Confirmed	C11H11N3O2S	SCNBimane	248.05	176444	1.642	N/A	N/A	Target Compound	49835	1.8	1.8	0.00	M-H	248.049	1.642	-1.7567	True	0.065	1	2697733	Method	N/A	N/A		PPB	Pass	Pass	Pass	N/A	Pass	66.2871	2 of 3	N/A	N/A
92	Processed	191107-092	Unknown		False	Plasma 397									Confirmed	C10[13]CH11N2[15]NO2S	SCNBimaneIS	250.05	2697733	1	1	N/A	Internal Standard	678319	1.8	1.8	0.00	M-H	250.05	1	-1.7768	True	N/A	N/A	N/A	Method	N/A	N/A			Pass	Pass	Pass	N/A	Pass	100	5 of 5	N/A	N/A
93	Processed	191107-093	Unknown		False	Plasma 398									Confirmed	C11H11N3O2S	SCNBimane	248.05	86638	1.025	N/A	N/A	Target Compound	24627	1.8	1.8	0.00	M-H	248.049	1.025	-1.5721	True	0.03	1	2889435	Method	N/A	N/A		PPB	Pass	Pass	Pass	N/A	Pass	64.7807	2 of 3	N/A	N/A
93	Processed	191107-093	Unknown		False	Plasma 398									Confirmed	C10[13]CH11N2[15]NO2S	SCNBimaneIS	250.05	2889435	1	1	N/A	Internal Standard	729978	1.8	1.8	0.00	M-H	250.05	1	-1.5937	True	N/A	N/A	N/A	Method	N/A	N/A			Pass	Pass	Pass	N/A	Pass	100	5 of 6	N/A	N/A
94	Processed	191107-094	Unknown		False	Plasma 399									Confirmed	C11H11N3O2S	SCNBimane	248.05	119385	1.25	N/A	N/A	Target Compound	32669	1.8	1.8	0.00	M-H	248.049	1.25	-1.8797	True	0.043	1	2784969	Method	N/A	N/A		PPB	Pass	Pass	Pass	N/A	Pass	65.7352	2 of 3	N/A	N/A
94	Processed	191107-094	Unknown		False	Plasma 399									Confirmed	C10[13]CH11N2[15]NO2S	SCNBimaneIS	250.05	2784969	1	1	N/A	Internal Standard	686800	1.8	1.8	0.00	M-H	250.05	1	-1.6547	True	N/A	N/A	N/A	Method	N/A	N/A			Pass	Pass	Pass	N/A	Pass	100	5 of 6	N/A	N/A
95	Processed	191107-095	Unknown		False	Plasma 400									Confirmed	C11H11N3O2S	SCNBimane	248.05	390675	2.896	N/A	N/A	Target Compound	109604	1.8	1.79	-0.01	M-H	248.049	2.896	-1.5106	True	0.137	1	2844535	Method	N/A	N/A		PPB	Pass	Pass	Pass	N/A	Pass	61.2848	2 of 5	N/A	N/A
95	Processed	191107-095	Unknown		False	Plasma 400									Confirmed	C10[13]CH11N2[15]NO2S	SCNBimaneIS	250.05	2844535	1	1	N/A	Internal Standard	711831	1.8	1.79	-0.01	M-H	250.05	1	-1.5327	True	N/A	N/A	N/A	Method	N/A	N/A			Pass	Pass	Pass	N/A	Pass	100	5 of 5	N/A	N/A
96	Processed	191107-096	Unknown		False	Plasma 401									Identified	C11H11N3O2S	SCNBimane	248.05	334731	2.632	N/A	N/A	Target Compound	94592	1.8	1.79	-0.01	M-H	248.049	2.632	-1.5106	True	0.122	1	2738964	Method	N/A	N/A		PPB	Pass	Pass	Fail	N/A	Pass	24.269	2 of 5	N/A	N/A
96	Processed	191107-096	Unknown		False	Plasma 401									Confirmed	C10[13]CH11N2[15]NO2S	SCNBimaneIS	250.05	2738964	1	1	N/A	Internal Standard	674790	1.8	1.79	-0.01	M-H	250.05	1	-1.5327	True	N/A	N/A	N/A	Method	N/A	N/A			Pass	Pass	Pass	N/A	Pass	100	5 of 5	N/A	N/A
97	Processed	191107-097	Unknown		False	Plasma 402									Confirmed	C11H11N3O2S	SCNBimane	248.05	72995	0.893	N/A	N/A	Target Compound	19563	1.8	1.79	-0.01	M-H	248.05	0.893	-1.3261	True	0.022	1	3263012	Method	N/A	N/A		PPB	Pass	Pass	Pass	N/A	Pass	83.2117	2 of 3	N/A	N/A
97	Processed	191107-097	Unknown		False	Plasma 402									Confirmed	C10[13]CH11N2[15]NO2S	SCNBimaneIS	250.05	3263012	1	1	N/A	Internal Standard	788952	1.8	1.8	0.00	M-H	250.05	1	-1.5937	True	N/A	N/A	N/A	Method	N/A	N/A			Pass	Pass	Pass	N/A	Pass	100	5 of 6	N/A	N/A
98	Processed	191107-098	Unknown		False	Plasma 403									Confirmed	C11H11N3O2S	SCNBimane	248.05	1001302	5.788	N/A	N/A	Target Compound	279541	1.8	1.8	0.00	M-H	248.049	5.788	-1.7567	True	0.303	1	3301180	Method	N/A	N/A		PPB	Pass	Pass	Pass	N/A	Pass	62.7251	2 of 5	N/A	N/A
98	Processed	191107-098	Unknown		False	Plasma 403									Confirmed	C10[13]CH11N2[15]NO2S	SCNBimaneIS	250.05	3301180	1	1	N/A	Internal Standard	814204	1.8	1.8	0.00	M-H	250.05	1	-1.6547	True	N/A	N/A	N/A	Method	N/A	N/A			Pass	Pass	Pass	N/A	Pass	100	5 of 6	N/A	N/A
99	Processed	191107-099	Unknown		False	Plasma 404									Identified	C11H11N3O2S	SCNBimane	248.05	1770536	10.072	N/A	N/A	Target Compound	474162	1.8	1.8	0.00	M-H	248.049	10.072	-2.0028	True	0.549	1	3224245	Method	N/A	N/A		PPB	Pass	Pass	Fail	N/A	Pass	58.6768	3 of 5	N/A	N/A
99	Processed	191107-099	Unknown		False	Plasma 404									Confirmed	C10[13]CH11N2[15]NO2S	SCNBimaneIS	250.05	3224245	1	1	N/A	Internal Standard	781630	1.8	1.8	0.00	M-H	250.05	1	-1.7768	True	N/A	N/A	N/A	Method	N/A	N/A			Pass	Pass	Pass	N/A	Pass	100	5 of 6	N/A	N/A
100	Processed	191107-100	Unknown		False	Plasma 405									Confirmed	C11H11N3O2S	SCNBimane	248.05	5100202	27.781	N/A	N/A	Target Compound	1374710	1.8	1.79	-0.01	M-H	248.049	27.781	-2.0643	True	1.565	1	3258055	Method	N/A	N/A		PPB	Pass	Pass	Pass	N/A	Pass	73.8813	5 of 8	N/A	N/A
100	Processed	191107-100	Unknown		False	Plasma 405									Confirmed	C10[13]CH11N2[15]NO2S	SCNBimaneIS	250.05	3258055	1	1	N/A	Internal Standard	805286	1.8	1.79	-0.01	M-H	250.05	1	-1.5937	True	N/A	N/A	N/A	Method	N/A	N/A			Pass	Pass	Pass	N/A	Pass	100	5 of 6	N/A	N/A
101	Processed	191107-101	Unknown		False	Plasma 406									Confirmed	C11H11N3O2S	SCNBimane	248.05	8842744	47.585	N/A	N/A	Target Compound	2404808	1.8	1.79	-0.01	M-H	248.049	47.585	-1.6337	True	2.702	1	3272766	Method	N/A	N/A		PPB	Pass	Pass	Pass	N/A	Pass	85.8994	6 of 9	N/A	N/A
101	Processed	191107-101	Unknown		False	Plasma 406									Confirmed	C10[13]CH11N2[15]NO2S	SCNBimaneIS	250.05	3272766	1	1	N/A	Internal Standard	811058	1.8	1.79	-0.01	M-H	250.05	1	-0.8004	True	N/A	N/A	N/A	Method	N/A	N/A			Pass	Pass	Pass	N/A	Pass	100	5 of 6	N/A	N/A
102	Processed	191107-102	Unknown		False	Plasma 407									Confirmed	C11H11N3O2S	SCNBimane	248.05	18904369	112.472	N/A	N/A	Target Compound	5061407	1.8	1.79	-0.01	M-H	248.049	112.472	-1.9412	True	6.426	1	2942040	Method	N/A	N/A		PPB	Pass	Pass	Pass	N/A	Pass	92.3751	7 of 9	N/A	N/A
102	Processed	191107-102	Unknown		False	Plasma 407									Confirmed	C10[13]CH11N2[15]NO2S	SCNBimaneIS	250.05	2942040	1	1	N/A	Internal Standard	722159	1.8	1.79	-0.01	M-H	250.05	1	-0.3122	True	N/A	N/A	N/A	Method	N/A	N/A			Pass	Pass	Pass	N/A	Pass	100	5 of 5	N/A	N/A
103	Processed	191107-103	Unknown		False	Plasma 408									Confirmed	C11H11N3O2S	SCNBimane	248.05	60810843	404.836	N/A	N/A	Target Compound	16222156	1.8	1.8	0.00	M-H	248.049	404.836	-2.1873	True	23.203	1	2620770	Method	N/A	N/A		PPB	Pass	Pass	Pass	N/A	Pass	100	9 of 9	N/A	N/A
103	Processed	191107-103	Unknown		False	Plasma 408									Confirmed	C10[13]CH11N2[15]NO2S	SCNBimaneIS	250.05	2620770	1	1	N/A	Internal Standard	651540	1.8	1.8	0.00	M-H	250.05	1	-1.7768	True	N/A	N/A	N/A	Method	N/A	N/A			Pass	Pass	Pass	N/A	Pass	100	5 of 5	N/A	N/A
104	Processed	191107-104	Unknown		False	Plasma 409									Confirmed	C11H11N3O2S	SCNBimane	248.05	4340391	23.124	N/A	N/A	Target Compound	1184321	1.8	1.8	0.00	M-H	248.049	23.124	-1.8182	True	1.298	1	3343456	Method	N/A	N/A		PPB	Pass	Pass	Pass	N/A	Pass	67.4203	4 of 7	N/A	N/A
104	Processed	191107-104	Unknown		False	Plasma 409									Confirmed	C10[13]CH11N2[15]NO2S	SCNBimaneIS	250.05	3343456	1	1	N/A	Internal Standard	827413	1.8	1.8	0.00	M-H	250.05	1	-1.4716	True	N/A	N/A	N/A	Method	N/A	N/A			Pass	Pass	Pass	N/A	Pass	100	5 of 5	N/A	N/A
105	Processed	191107-105	Unknown		False	Gill 397									Confirmed	C11H11N3O2S	SCNBimane	248.05	139049	1.21	N/A	N/A	Target Compound	38846	1.8	1.8	0.00	M-H	248.05	1.21	-1.3876	True	0.041	1	3425873	Method	N/A	N/A		PPB	Pass	Pass	Pass	N/A	Pass	64.9511	2 of 3	N/A	N/A
105	Processed	191107-105	Unknown		False	Gill 397									Confirmed	C10[13]CH11N2[15]NO2S	SCNBimaneIS	250.05	3425873	1	1	N/A	Internal Standard	836532	1.8	1.79	-0.01	M-H	250.05	1	-1.8378	True	N/A	N/A	N/A	Method	N/A	N/A			Pass	Pass	Pass	N/A	Pass	100	5 of 6	N/A	N/A
106	Processed	191107-106	Unknown		False	Gill 398									Identified	C11H11N3O2S	SCNBimane	248.05	306292	2.11	N/A	N/A	Target Compound	83894	1.8	1.8	0.00	M-H	248.049	2.11	-1.6952	True	0.092	1	3320300	Method	N/A	N/A		PPB	Pass	Pass	Fail	N/A	Pass	59.2124	2 of 5	N/A	N/A
106	Processed	191107-106	Unknown		False	Gill 398									Confirmed	C10[13]CH11N2[15]NO2S	SCNBimaneIS	250.05	3320300	1	1	N/A	Internal Standard	811183	1.8	1.8	0.00	M-H	250.05	1	-1.5937	True	N/A	N/A	N/A	Method	N/A	N/A			Pass	Pass	Pass	N/A	Pass	100	6 of 6	N/A	N/A
107	Processed	191107-107	Unknown		False	Gill 399									Confirmed	C11H11N3O2S	SCNBimane	248.05	258626	1.86	N/A	N/A	Target Compound	69713	1.8	1.79	-0.01	M-H	248.049	1.86	-1.5106	True	0.078	1	3320769	Method	N/A	N/A		PPB	Pass	Pass	Pass	N/A	Pass	62.9172	2 of 4	N/A	N/A
107	Processed	191107-107	Unknown		False	Gill 399									Confirmed	C10[13]CH11N2[15]NO2S	SCNBimaneIS	250.05	3320769	1	1	N/A	Internal Standard	799365	1.8	1.79	-0.01	M-H	250.05	1	-1.5937	True	N/A	N/A	N/A	Method	N/A	N/A			Pass	Pass	Pass	N/A	Pass	100	5 of 6	N/A	N/A
108	Processed	191107-108	Unknown		False	Gill 400									Confirmed	C11H11N3O2S	SCNBimane	248.05	206428	1.611	N/A	N/A	Target Compound	56408	1.8	1.8	0.00	M-H	248.05	1.611	-1.3261	True	0.064	1	3246721	Method	N/A	N/A		PPB	Pass	Pass	Pass	N/A	Pass	62.6269	3 of 5	N/A	N/A
108	Processed	191107-108	Unknown		False	Gill 400									Confirmed	C10[13]CH11N2[15]NO2S	SCNBimaneIS	250.05	3246721	1	1	N/A	Internal Standard	784852	1.8	1.79	-0.01	M-H	250.05	1	-1.5937	True	N/A	N/A	N/A	Method	N/A	N/A			Pass	Pass	Pass	N/A	Pass	100	5 of 6	N/A	N/A
109	Processed	191107-109	Unknown		False	Gill 401									Confirmed	C11H11N3O2S	SCNBimane	248.05	977925	5.75	N/A	N/A	Target Compound	267034	1.8	1.79	-0.01	M-H	248.049	5.75	-1.6337	True	0.301	1	3247706	Method	N/A	N/A		PPB	Pass	Pass	Pass	N/A	Pass	62.73	2 of 5	N/A	N/A
109	Processed	191107-109	Unknown		False	Gill 401									Confirmed	C10[13]CH11N2[15]NO2S	SCNBimaneIS	250.05	3247706	1	1	N/A	Internal Standard	802024	1.8	1.79	-0.01	M-H	250.05	1	-1.5327	True	N/A	N/A	N/A	Method	N/A	N/A			Pass	Pass	Pass	N/A	Pass	100	6 of 6	N/A	N/A
110	Processed	191107-110	Unknown		False	Gill 402									Confirmed	C11H11N3O2S	SCNBimane	248.05	652069	3.869	N/A	N/A	Target Compound	177583	1.8	1.79	-0.01	M-H	248.049	3.869	-1.5106	True	0.193	1	3375058	Method	N/A	N/A		PPB	Pass	Pass	Pass	N/A	Pass	62.0855	2 of 5	N/A	N/A
110	Processed	191107-110	Unknown		False	Gill 402									Confirmed	C10[13]CH11N2[15]NO2S	SCNBimaneIS	250.05	3375058	1	1	N/A	Internal Standard	830120	1.8	1.79	-0.01	M-H	250.05	1	-1.5327	True	N/A	N/A	N/A	Method	N/A	N/A			Pass	Pass	Pass	N/A	Pass	100	5 of 6	N/A	N/A
111	Processed	191107-111	Unknown		False	Gill 403									Confirmed	C11H11N3O2S	SCNBimane	248.05	809648	4.559	N/A	N/A	Target Compound	219867	1.8	1.8	0.00	M-H	248.049	4.559	-1.7567	True	0.233	1	3477825	Method	N/A	N/A		PPB	Pass	Pass	Pass	N/A	Pass	62.4575	2 of 5	N/A	N/A
111	Processed	191107-111	Unknown		False	Gill 403									Confirmed	C10[13]CH11N2[15]NO2S	SCNBimaneIS	250.05	3477825	1	1	N/A	Internal Standard	858468	1.8	1.8	0.00	M-H	250.05	1	-1.5937	True	N/A	N/A	N/A	Method	N/A	N/A			Pass	Pass	Pass	N/A	Pass	100	5 of 6	N/A	N/A
112	Processed	191107-112	Unknown		False	Gill 404									Identified	C11H11N3O2S	SCNBimane	248.05	285601	1.903	N/A	N/A	Target Compound	76574	1.8	1.79	-0.01	M-H	248.049	1.903	-1.5106	True	0.08	1	3553620	Method	N/A	N/A		PPB	Pass	Pass	Fail	N/A	Pass	5.89519	3 of 5	N/A	N/A
112	Processed	191107-112	Unknown		False	Gill 404									Confirmed	C10[13]CH11N2[15]NO2S	SCNBimaneIS	250.05	3553620	1	1	N/A	Internal Standard	869973	1.8	1.79	-0.01	M-H	250.05	1	-1.6547	True	N/A	N/A	N/A	Method	N/A	N/A			Pass	Pass	Pass	N/A	Pass	100	5 of 6	N/A	N/A
113	Processed	191107-113	Unknown		False	Gill 405									Confirmed	C11H11N3O2S	SCNBimane	248.05	665280	3.778	N/A	N/A	Target Compound	180269	1.8	1.79	-0.01	M-H	248.049	3.778	-1.6952	True	0.188	1	3539796	Method	N/A	N/A		PPB	Pass	Pass	Pass	N/A	Pass	62.0804	2 of 5	N/A	N/A
113	Processed	191107-113	Unknown		False	Gill 405									Confirmed	C10[13]CH11N2[15]NO2S	SCNBimaneIS	250.05	3539796	1	1	N/A	Internal Standard	867847	1.8	1.79	-0.01	M-H	250.05	1	-1.5937	True	N/A	N/A	N/A	Method	N/A	N/A			Pass	Pass	Pass	N/A	Pass	100	5 of 6	N/A	N/A
114	Processed	191107-114	Unknown		False	Gill 406									Confirmed	C11H11N3O2S	SCNBimane	248.05	256970	1.757	N/A	N/A	Target Compound	72156	1.8	1.79	-0.01	M-H	248.049	1.757	-1.5721	True	0.072	1	3570972	Method	N/A	N/A		PPB	Pass	Pass	Pass	N/A	Pass	62.8075	2 of 4	N/A	N/A
114	Processed	191107-114	Unknown		False	Gill 406									Confirmed	C10[13]CH11N2[15]NO2S	SCNBimaneIS	250.05	3570972	1	1	N/A	Internal Standard	878509	1.8	1.79	-0.01	M-H	250.05	1	-1.5937	True	N/A	N/A	N/A	Method	N/A	N/A			Pass	Pass	Pass	N/A	Pass	100	5 of 6	N/A	N/A
115	Processed	191107-115	Unknown		False	Gill 407									Confirmed	C11H11N3O2S	SCNBimane	248.05	807034	4.372	N/A	N/A	Target Compound	219628	1.8	1.79	-0.01	M-H	248.049	4.372	-1.7567	True	0.222	1	3634864	Method	N/A	N/A		PPB	Pass	Pass	Pass	N/A	Pass	62.4584	2 of 5	N/A	N/A
115	Processed	191107-115	Unknown		False	Gill 407									Confirmed	C10[13]CH11N2[15]NO2S	SCNBimaneIS	250.05	3634864	1	1	N/A	Internal Standard	898974	1.8	1.79	-0.01	M-H	250.05	1	-1.7157	True	N/A	N/A	N/A	Method	N/A	N/A			Pass	Pass	Pass	N/A	Pass	100	5 of 6	N/A	N/A
116	Processed	191107-116	Unknown		False	Gill 408									Confirmed	C11H11N3O2S	SCNBimane	248.05	1357501	6.931	N/A	N/A	Target Compound	359872	1.8	1.79	-0.01	M-H	248.049	6.931	-1.6337	True	0.369	1	3679912	Method	N/A	N/A		PPB	Pass	Pass	Pass	N/A	Pass	62.9091	3 of 5	N/A	N/A
116	Processed	191107-116	Unknown		False	Gill 408									Confirmed	C10[13]CH11N2[15]NO2S	SCNBimaneIS	250.05	3679912	1	1	N/A	Internal Standard	890632	1.8	1.79	-0.01	M-H	250.05	1	-1.5327	True	N/A	N/A	N/A	Method	N/A	N/A			Pass	Pass	Pass	N/A	Pass	100	5 of 6	N/A	N/A
117	Processed	191107-117	Unknown		False	Gill 409									Identified	C11H11N3O2S	SCNBimane	248.05	3011338	15.395	N/A	N/A	Target Compound	807303	1.8	1.8	0.00	M-H	248.049	15.395	-1.7567	True	0.855	1	3523659	Method	N/A	N/A		PPB	Pass	Pass	Fail	N/A	Pass	48.3642	4 of 6	N/A	N/A
117	Processed	191107-117	Unknown		False	Gill 409									Confirmed	C10[13]CH11N2[15]NO2S	SCNBimaneIS	250.05	3523659	1	1	N/A	Internal Standard	869681	1.8	1.8	0.00	M-H	250.05	1	-1.4716	True	N/A	N/A	N/A	Method	N/A	N/A			Pass	Pass	Pass	N/A	Pass	100	5 of 6	N/A	N/A
118	Processed	191107-118	Unknown		False	Liver 397									Confirmed	C11H11N3O2S	SCNBimane	248.05	487151	2.988	N/A	N/A	Target Compound	130679	1.8	1.8	0.00	M-H	248.049	2.988	-1.6337	True	0.143	1	3415275	Method	N/A	N/A		PPB	Pass	Pass	Pass	N/A	Pass	79.8988	3 of 5	N/A	N/A
118	Processed	191107-118	Unknown		False	Liver 397									Confirmed	C10[13]CH11N2[15]NO2S	SCNBimaneIS	250.05	3415275	1	1	N/A	Internal Standard	830914	1.8	1.8	0.00	M-H	250.05	1	-1.5327	True	N/A	N/A	N/A	Method	N/A	N/A			Pass	Pass	Pass	N/A	Pass	100	5 of 6	N/A	N/A
119	Processed	191107-119	Unknown		False	Liver 398									Confirmed	C11H11N3O2S	SCNBimane	248.05	3433091	18.983	N/A	N/A	Target Compound	926279	1.8	1.79	-0.01	M-H	248.05	18.983	-1.4491	True	1.061	1	3237113	Method	N/A	N/A		PPB	Pass	Pass	Pass	N/A	Pass	60.0202	4 of 7	N/A	N/A
119	Processed	191107-119	Unknown		False	Liver 398									Confirmed	C10[13]CH11N2[15]NO2S	SCNBimaneIS	250.05	3237113	1	1	N/A	Internal Standard	790267	1.8	1.79	-0.01	M-H	250.05	1	-1.1665	True	N/A	N/A	N/A	Method	N/A	N/A			Pass	Pass	Pass	N/A	Pass	100	5 of 6	N/A	N/A
120	Processed	191107-120	Unknown		False	Liver 399									Identified	C11H11N3O2S	SCNBimane	248.05	1119878	6.393	N/A	N/A	Target Compound	300346	1.8	1.79	-0.01	M-H	248.049	6.393	-1.6337	True	0.338	1	3313062	Method	N/A	N/A		PPB	Pass	Pass	Fail	N/A	Pass	53.2031	3 of 5	N/A	N/A
120	Processed	191107-120	Unknown		False	Liver 399									Confirmed	C10[13]CH11N2[15]NO2S	SCNBimaneIS	250.05	3313062	1	1	N/A	Internal Standard	807977	1.8	1.79	-0.01	M-H	250.05	1	-1.4716	True	N/A	N/A	N/A	Method	N/A	N/A			Pass	Pass	Pass	N/A	Pass	100	5 of 6	N/A	N/A
121	Processed	191107-121	Unknown		False	Liver 400									Confirmed	C11H11N3O2S	SCNBimane	248.05	9132160	51.176	N/A	N/A	Target Compound	2476263	1.8	1.79	-0.01	M-H	248.049	51.176	-2.0028	True	2.908	1	3140398	Method	N/A	N/A		PPB	Pass	Pass	Pass	N/A	Pass	87.4999	7 of 9	N/A	N/A
121	Processed	191107-121	Unknown		False	Liver 400									Confirmed	C10[13]CH11N2[15]NO2S	SCNBimaneIS	250.05	3140398	1	1	N/A	Internal Standard	776748	1.8	1.79	-0.01	M-H	250.05	1	-1.2275	True	N/A	N/A	N/A	Method	N/A	N/A			Pass	Pass	Pass	N/A	Pass	100	5 of 5	N/A	N/A
122	Processed	191107-122	Unknown		False	Liver 401									Confirmed	C11H11N3O2S	SCNBimane	248.05	512585	3.039	N/A	N/A	Target Compound	140015	1.8	1.8	0.00	M-H	248.05	3.039	-1.2646	True	0.146	1	3521012	Method	N/A	N/A		PPB	Pass	Pass	Pass	N/A	Pass	61.4982	2 of 5	N/A	N/A
122	Processed	191107-122	Unknown		False	Liver 401									Confirmed	C10[13]CH11N2[15]NO2S	SCNBimaneIS	250.05	3521012	1	1	N/A	Internal Standard	869771	1.8	1.8	0.00	M-H	250.05	1	-1.2886	True	N/A	N/A	N/A	Method	N/A	N/A			Pass	Pass	Pass	N/A	Pass	100	5 of 6	N/A	N/A
123	Processed	191107-123	Unknown		False	Liver 402									Confirmed	C11H11N3O2S	SCNBimane	248.05	5905562	30.684	N/A	N/A	Target Compound	1614880	1.8	1.79	-0.01	M-H	248.049	30.684	-1.8797	True	1.732	1	3409686	Method	N/A	N/A		PPB	Pass	Pass	Pass	N/A	Pass	75.7505	5 of 8	N/A	N/A
123	Processed	191107-123	Unknown		False	Liver 402									Confirmed	C10[13]CH11N2[15]NO2S	SCNBimaneIS	250.05	3409686	1	1	N/A	Internal Standard	848875	1.8	1.79	-0.01	M-H	250.05	1	-1.4106	True	N/A	N/A	N/A	Method	N/A	N/A			Pass	Pass	Pass	N/A	Pass	100	5 of 6	N/A	N/A
124	Processed	191107-124	Unknown		False	Liver 403									Confirmed	C11H11N3O2S	SCNBimane	248.05	742440	5.057	N/A	N/A	Target Compound	203189	1.8	1.79	-0.01	M-H	248.049	5.057	-1.5106	True	0.261	1	2840958	Method	N/A	N/A		PPB	Pass	Pass	Pass	N/A	Pass	64.1663	2 of 5	N/A	N/A
124	Processed	191107-124	Unknown		False	Liver 403									Confirmed	C10[13]CH11N2[15]NO2S	SCNBimaneIS	250.05	2840958	1	1	N/A	Internal Standard	705001	1.8	1.8	0.00	M-H	250.05	1	-1.5937	True	N/A	N/A	N/A	Method	N/A	N/A			Pass	Pass	Pass	N/A	Pass	100	5 of 5	N/A	N/A
125	Processed	191107-125	Unknown		False	Liver 404									Confirmed	C11H11N3O2S	SCNBimane	248.05	558977	4.038	N/A	N/A	Target Compound	151527	1.8	1.79	-0.01	M-H	248.05	4.038	-1.4491	True	0.203	1	2755253	Method	N/A	N/A		PPB	Pass	Pass	Pass	N/A	Pass	59.5897	2 of 5	N/A	N/A
125	Processed	191107-125	Unknown		False	Liver 404									Confirmed	C10[13]CH11N2[15]NO2S	SCNBimaneIS	250.05	2755253	1	1	N/A	Internal Standard	697414	1.8	1.79	-0.01	M-H	250.05	1	-1.5327	True	N/A	N/A	N/A	Method	N/A	N/A			Pass	Pass	Pass	N/A	Pass	100	5 of 5	N/A	N/A
126	Processed	191107-126	Unknown		False	Liver 405									Confirmed	C11H11N3O2S	SCNBimane	248.05	850489	6.262	N/A	N/A	Target Compound	229224	1.8	1.8	0.00	M-H	248.05	6.262	-1.3261	True	0.331	1	2573109	Method	N/A	N/A		PPB	Pass	Pass	Pass	N/A	Pass	60.2283	3 of 5	N/A	N/A
126	Processed	191107-126	Unknown		False	Liver 405									Confirmed	C10[13]CH11N2[15]NO2S	SCNBimaneIS	250.05	2573109	1	1	N/A	Internal Standard	655259	1.8	1.8	0.00	M-H	250.05	1	-1.2275	True	N/A	N/A	N/A	Method	N/A	N/A			Pass	Pass	Pass	N/A	Pass	100	5 of 5	N/A	N/A
127	Processed	191107-127	Unknown		False	Liver 406									Identified	C11H11N3O2S	SCNBimane	248.05	446128	3.175	N/A	N/A	Target Compound	119686	1.8	1.78	-0.02	M-H	248.05	3.175	-1.2031	True	0.153	1	2909115	Method	N/A	N/A		PPB	Pass	Pass	Fail	N/A	Pass	58.9551	2 of 5	N/A	N/A
127	Processed	191107-127	Unknown		False	Liver 406									Confirmed	C10[13]CH11N2[15]NO2S	SCNBimaneIS	250.05	2909115	1	1	N/A	Internal Standard	717663	1.8	1.79	-0.01	M-H	250.05	1	-1.4106	True	N/A	N/A	N/A	Method	N/A	N/A			Pass	Pass	Pass	N/A	Pass	100	5 of 6	N/A	N/A
128	Processed	191107-128	Unknown		False	Liver 407									Confirmed	C11H11N3O2S	SCNBimane	248.05	740459	4.751	N/A	N/A	Target Compound	209133	1.8	1.79	-0.01	M-H	248.049	4.751	-1.5106	True	0.244	1	3037154	Method	N/A	N/A		PPB	Pass	Pass	Pass	N/A	Pass	59.6862	2 of 5	N/A	N/A
128	Processed	191107-128	Unknown		False	Liver 407									Confirmed	C10[13]CH11N2[15]NO2S	SCNBimaneIS	250.05	3037154	1	1	N/A	Internal Standard	777155	1.8	1.79	-0.01	M-H	250.05	1	-1.4106	True	N/A	N/A	N/A	Method	N/A	N/A			Pass	Pass	Pass	N/A	Pass	100	5 of 5	N/A	N/A
129	Processed	191107-129	Unknown		False	Liver 408									Confirmed	C11H11N3O2S	SCNBimane	248.05	1085876	6.987	N/A	N/A	Target Compound	293390	1.8	1.79	-0.01	M-H	248.05	6.987	-1.4491	True	0.372	1	2918314	Method	N/A	N/A		PPB	Pass	Pass	Pass	N/A	Pass	60.0303	3 of 5	N/A	N/A
129	Processed	191107-129	Unknown		False	Liver 408									Confirmed	C10[13]CH11N2[15]NO2S	SCNBimaneIS	250.05	2918314	1	1	N/A	Internal Standard	736942	1.8	1.79	-0.01	M-H	250.05	1	-1.2886	True	N/A	N/A	N/A	Method	N/A	N/A			Pass	Pass	Pass	N/A	Pass	100	5 of 6	N/A	N/A
130	Processed	191107-130	Unknown		False	Liver 409									Identified	C11H11N3O2S	SCNBimane	248.05	1732923	10.879	N/A	N/A	Target Compound	468640	1.8	1.79	-0.01	M-H	248.049	10.879	-1.5106	True	0.595	1	2910207	Method	N/A	N/A		PPB	Pass	Pass	Fail	N/A	Pass	57.8902	4 of 6	N/A	N/A
130	Processed	191107-130	Unknown		False	Liver 409									Confirmed	C10[13]CH11N2[15]NO2S	SCNBimaneIS	250.05	2910207	1	1	N/A	Internal Standard	727750	1.8	1.79	-0.01	M-H	250.05	1	-1.2886	True	N/A	N/A	N/A	Method	N/A	N/A			Pass	Pass	Pass	N/A	Pass	100	5 of 5	N/A	N/A
131	Processed	191107-131	Unknown		False	Tissue 397									Identified	C11H11N3O2S	SCNBimane	248.05	1642000	10.882	N/A	N/A	Target Compound	453807	1.8	1.79	-0.01	M-H	248.05	10.882	-1.3261	True	0.596	1	2756830	Method	N/A	N/A		PPB	Pass	Pass	Fail	N/A	Pass	57.6138	3 of 5	N/A	N/A
131	Processed	191107-131	Unknown		False	Tissue 397									Confirmed	C10[13]CH11N2[15]NO2S	SCNBimaneIS	250.05	2756830	1	1	N/A	Internal Standard	707946	1.8	1.79	-0.01	M-H	250.05	1	-1.1055	True	N/A	N/A	N/A	Method	N/A	N/A			Pass	Pass	Pass	N/A	Pass	100	5 of 5	N/A	N/A
132	Processed	191107-132	Unknown		False	Tissue 398									Identified	C11H11N3O2S	SCNBimane	248.05	349674	2.922	N/A	N/A	Target Compound	94789	1.8	1.79	-0.01	M-H	248.05	2.922	-1.2646	True	0.139	1	2518408	Method	N/A	N/A		PPB	Pass	Pass	Fail	N/A	Pass	28.7258	2 of 5	N/A	N/A
132	Processed	191107-132	Unknown		False	Tissue 398									Confirmed	C10[13]CH11N2[15]NO2S	SCNBimaneIS	250.05	2518408	1	1	N/A	Internal Standard	628485	1.8	1.79	-0.01	M-H	250.05	1	-1.2886	True	N/A	N/A	N/A	Method	N/A	N/A			Pass	Pass	Pass	N/A	Pass	100	5 of 5	N/A	N/A
133	Processed	191107-133	Unknown		False	Tissue 399									Confirmed	C11H11N3O2S	SCNBimane	248.05	1129269	7.453	N/A	N/A	Target Compound	305726	1.8	1.79	-0.01	M-H	248.05	7.453	-1.4491	True	0.399	1	2831354	Method	N/A	N/A		PPB	Pass	Pass	Pass	N/A	Pass	60.046	3 of 5	N/A	N/A
133	Processed	191107-133	Unknown		False	Tissue 399									Confirmed	C10[13]CH11N2[15]NO2S	SCNBimaneIS	250.05	2831354	1	1	N/A	Internal Standard	709106	1.8	1.79	-0.01	M-H	250.05	1	-1.2886	True	N/A	N/A	N/A	Method	N/A	N/A			Pass	Pass	Pass	N/A	Pass	100	5 of 5	N/A	N/A
134	Processed	191107-134	Unknown		False	Tissue 400									Identified	C11H11N3O2S	SCNBimane	248.05	880871	6.654	N/A	N/A	Target Compound	241099	1.8	1.8	0.00	M-H	248.05	6.654	-1.4491	True	0.353	1	2495317	Method	N/A	N/A		PPB	Pass	Pass	Fail	N/A	Pass	53.998	4 of 6	N/A	N/A
134	Processed	191107-134	Unknown		False	Tissue 400									Confirmed	C10[13]CH11N2[15]NO2S	SCNBimaneIS	250.05	2495317	1	1	N/A	Internal Standard	640592	1.8	1.8	0.00	M-H	250.05	1	-1.2275	True	N/A	N/A	N/A	Method	N/A	N/A			Pass	Pass	Pass	N/A	Pass	100	5 of 5	N/A	N/A
135	Processed	191107-135	Unknown		False	Tissue 401									Confirmed	C11H11N3O2S	SCNBimane	248.05	756075	5.133	N/A	N/A	Target Compound	208027	1.8	1.79	-0.01	M-H	248.05	5.133	-1.3261	True	0.266	1	2845108	Method	N/A	N/A		PPB	Pass	Pass	Pass	N/A	Pass	60.4127	3 of 6	N/A	N/A
135	Processed	191107-135	Unknown		False	Tissue 401									Confirmed	C10[13]CH11N2[15]NO2S	SCNBimaneIS	250.05	2845108	1	1	N/A	Internal Standard	713578	1.8	1.8	0.00	M-H	250.05	1	-1.2275	True	N/A	N/A	N/A	Method	N/A	N/A			Pass	Pass	Pass	N/A	Pass	100	5 of 5	N/A	N/A
136	Processed	191107-136	Unknown		False	Tissue 402									Identified	C11H11N3O2S	SCNBimane	248.05	1585646	10.501	N/A	N/A	Target Compound	424115	1.8	1.78	-0.02	M-H	248.05	10.501	-1.2646	True	0.574	1	2763464	Method	N/A	N/A		PPB	Pass	Pass	Fail	N/A	Pass	56.8568	3 of 5	N/A	N/A
136	Processed	191107-136	Unknown		False	Tissue 402									Confirmed	C10[13]CH11N2[15]NO2S	SCNBimaneIS	250.05	2763464	1	1	N/A	Internal Standard	698488	1.8	1.78	-0.02	M-H	250.05	1	-1.1055	True	N/A	N/A	N/A	Method	N/A	N/A			Pass	Pass	Pass	N/A	Pass	100	5 of 5	N/A	N/A
137	Processed	191107-137	Unknown		False	Tissue 403									Confirmed	C11H11N3O2S	SCNBimane	248.05	4618869	28.456	N/A	N/A	Target Compound	1249818	1.8	1.79	-0.01	M-H	248.05	28.456	-1.2646	True	1.604	1	2879297	Method	N/A	N/A		PPB	Pass	Pass	Pass	N/A	Pass	75.3409	4 of 7	N/A	N/A
137	Processed	191107-137	Unknown		False	Tissue 403									Confirmed	C10[13]CH11N2[15]NO2S	SCNBimaneIS	250.05	2879297	1	1	N/A	Internal Standard	731717	1.8	1.79	-0.01	M-H	250.05	1	-0.7394	True	N/A	N/A	N/A	Method	N/A	N/A			Pass	Pass	Pass	N/A	Pass	100	5 of 5	N/A	N/A
138	Processed	191107-138	Unknown		False	Tissue 404									Confirmed	C11H11N3O2S	SCNBimane	248.05	1325404	8.61	N/A	N/A	Target Compound	356530	1.8	1.79	-0.01	M-H	248.05	8.61	-1.2646	True	0.465	1	2848654	Method	N/A	N/A		PPB	Pass	Pass	Pass	N/A	Pass	60.1264	3 of 5	N/A	N/A
138	Processed	191107-138	Unknown		False	Tissue 404									Confirmed	C10[13]CH11N2[15]NO2S	SCNBimaneIS	250.05	2848654	1	1	N/A	Internal Standard	716226	1.8	1.79	-0.01	M-H	250.05	1	-1.1055	True	N/A	N/A	N/A	Method	N/A	N/A			Pass	Pass	Pass	N/A	Pass	100	5 of 5	N/A	N/A
139	Processed	191107-139	Unknown		False	Tissue 405									Confirmed	C11H11N3O2S	SCNBimane	248.05	3171445	19.78	N/A	N/A	Target Compound	883949	1.8	1.79	-0.01	M-H	248.05	19.78	-1.3261	True	1.106	1	2866804	Method	N/A	N/A		PPB	Pass	Pass	Pass	N/A	Pass	86.1483	4 of 6	N/A	N/A
139	Processed	191107-139	Unknown		False	Tissue 405									Confirmed	C10[13]CH11N2[15]NO2S	SCNBimaneIS	250.05	2866804	1	1	N/A	Internal Standard	741472	1.8	1.79	-0.01	M-H	250.05	1	-0.9224	True	N/A	N/A	N/A	Method	N/A	N/A			Pass	Pass	Pass	N/A	Pass	100	5 of 5	N/A	N/A
140	Processed	191107-140	Unknown		False	Tissue 406									Identified	C11H11N3O2S	SCNBimane	248.05	2750226	16.623	N/A	N/A	Target Compound	755368	1.8	1.79	-0.01	M-H	248.05	16.623	-1.2031	True	0.925	1	2972879	Method	N/A	N/A		PPB	Pass	Pass	Fail	N/A	Pass	52.8123	4 of 6	N/A	N/A
140	Processed	191107-140	Unknown		False	Tissue 406									Confirmed	C10[13]CH11N2[15]NO2S	SCNBimaneIS	250.05	2972879	1	1	N/A	Internal Standard	752503	1.8	1.79	-0.01	M-H	250.05	1	-0.8614	True	N/A	N/A	N/A	Method	N/A	N/A			Pass	Pass	Pass	N/A	Pass	100	5 of 5	N/A	N/A
141	Processed	191107-141	Unknown		False	Tissue 407									Confirmed	C11H11N3O2S	SCNBimane	248.05	4679981	29.115	N/A	N/A	Target Compound	1281389	1.8	1.79	-0.01	M-H	248.05	29.115	-1.3876	True	1.642	1	2850174	Method	N/A	N/A		PPB	Pass	Pass	Pass	N/A	Pass	73.2711	4 of 7	N/A	N/A
141	Processed	191107-141	Unknown		False	Tissue 407									Confirmed	C10[13]CH11N2[15]NO2S	SCNBimaneIS	250.05	2850174	1	1	N/A	Internal Standard	724663	1.8	1.79	-0.01	M-H	250.05	1	-0.8614	True	N/A	N/A	N/A	Method	N/A	N/A			Pass	Pass	Pass	N/A	Pass	100	5 of 5	N/A	N/A
142	Processed	191107-142	Unknown		False	Tissue 408									Identified	C11H11N3O2S	SCNBimane	248.05	1552515	10.388	N/A	N/A	Target Compound	425537	1.8	1.79	-0.01	M-H	248.05	10.388	-1.1415	True	0.567	1	2736633	Method	N/A	N/A		PPB	Pass	Pass	Fail	N/A	Pass	57.3948	3 of 5	N/A	N/A
142	Processed	191107-142	Unknown		False	Tissue 408									Confirmed	C10[13]CH11N2[15]NO2S	SCNBimaneIS	250.05	2736633	1	1	N/A	Internal Standard	684918	1.8	1.79	-0.01	M-H	250.05	1	-0.9224	True	N/A	N/A	N/A	Method	N/A	N/A			Pass	Pass	Pass	N/A	Pass	100	5 of 5	N/A	N/A
143	Processed	191107-143	Unknown		False	Tissue 409									Confirmed	C11H11N3O2S	SCNBimane	248.05	3835091	23.985	N/A	N/A	Target Compound	1041371	1.8	1.8	0.00	M-H	248.05	23.985	-1.1415	True	1.348	1	2845961	Method	N/A	N/A		PPB	Pass	Pass	Pass	N/A	Pass	69.6199	5 of 8	N/A	N/A
143	Processed	191107-143	Unknown		False	Tissue 409									Confirmed	C10[13]CH11N2[15]NO2S	SCNBimaneIS	250.05	2845961	1	1	N/A	Internal Standard	728341	1.8	1.8	0.00	M-H	250.05	1	-0.8004	True	N/A	N/A	N/A	Method	N/A	N/A			Pass	Pass	Pass	N/A	Pass	100	5 of 5	N/A	N/A
144	Processed	191107-144	Unknown		False	H20 397									Identified	C11H11N3O2S	SCNBimane	248.05	1176340	7.905	N/A	N/A	Target Compound	330587	1.8	1.79	-0.01	M-H	248.05	7.905	-1.1415	True	0.425	1	2769311	Method	N/A	N/A		PPB	Pass	Pass	Fail	N/A	Pass	58.5543	4 of 6	N/A	N/A
144	Processed	191107-144	Unknown		False	H20 397									Confirmed	C10[13]CH11N2[15]NO2S	SCNBimaneIS	250.05	2769311	1	1	N/A	Internal Standard	704239	1.8	1.79	-0.01	M-H	250.05	1	-0.9835	True	N/A	N/A	N/A	Method	N/A	N/A			Pass	Pass	Pass	N/A	Pass	100	5 of 5	N/A	N/A
145	Processed	191107-145	Unknown		False	H20 398									Confirmed	C11H11N3O2S	SCNBimane	248.05	1013385	7.11	N/A	N/A	Target Compound	278454	1.8	1.79	-0.01	M-H	248.05	7.11	-1.0185	True	0.379	1	2672673	Method	N/A	N/A		PPB	Pass	Pass	Pass	N/A	Pass	63.5418	4 of 6	N/A	N/A
145	Processed	191107-145	Unknown		False	H20 398									Confirmed	C10[13]CH11N2[15]NO2S	SCNBimaneIS	250.05	2672673	1	1	N/A	Internal Standard	667569	1.8	1.79	-0.01	M-H	250.05	1	-0.8004	True	N/A	N/A	N/A	Method	N/A	N/A			Pass	Pass	Pass	N/A	Pass	100	5 of 5	N/A	N/A
146	Processed	191107-146	Unknown		False	H20 399									Confirmed	C11H11N3O2S	SCNBimane	248.05	480682	3.455	N/A	N/A	Target Compound	132711	1.8	1.78	-0.02	M-H	248.05	3.455	-1.1415	True	0.169	1	2836706	Method	N/A	N/A		PPB	Pass	Pass	Pass	N/A	Pass	62.6305	3 of 6	N/A	N/A
146	Processed	191107-146	Unknown		False	H20 399									Confirmed	C10[13]CH11N2[15]NO2S	SCNBimaneIS	250.05	2836706	1	1	N/A	Internal Standard	689596	1.8	1.78	-0.02	M-H	250.05	1	-1.0445	True	N/A	N/A	N/A	Method	N/A	N/A			Pass	Pass	Pass	N/A	Pass	100	5 of 6	N/A	N/A
147	Processed	191107-147	Unknown		False	H20 400									Confirmed	C11H11N3O2S	SCNBimane	248.05	667246	4.716	N/A	N/A	Target Compound	180640	1.8	1.79	-0.01	M-H	248.05	4.716	-0.957	True	0.242	1	2759510	Method	N/A	N/A		PPB	Pass	Pass	Pass	N/A	Pass	62.7595	2 of 5	N/A	N/A
147	Processed	191107-147	Unknown		False	H20 400									Confirmed	C10[13]CH11N2[15]NO2S	SCNBimaneIS	250.05	2759510	1	1	N/A	Internal Standard	671336	1.8	1.79	-0.01	M-H	250.05	1	-0.9224	True	N/A	N/A	N/A	Method	N/A	N/A			Pass	Pass	Pass	N/A	Pass	100	5 of 6	N/A	N/A
148	Processed	191107-148	Unknown		False	H20 401									Identified	C11H11N3O2S	SCNBimane	248.05	841253	6.51	N/A	N/A	Target Compound	226398	1.8	1.79	-0.01	M-H	248.05	6.51	-0.7725	True	0.345	1	2440379	Method	N/A	N/A		PPB	Pass	Pass	Fail	N/A	Pass	56.5084	4 of 6	N/A	N/A
148	Processed	191107-148	Unknown		False	H20 401									Confirmed	C10[13]CH11N2[15]NO2S	SCNBimaneIS	250.05	2440379	1	1	N/A	Internal Standard	591500	1.8	1.79	-0.01	M-H	250.05	1	-0.5563	True	N/A	N/A	N/A	Method	N/A	N/A			Pass	Pass	Pass	N/A	Pass	100	5 of 5	N/A	N/A
149	Processed	191107-149	Unknown		False	H20 402									Confirmed	C11H11N3O2S	SCNBimane	248.05	1961519	12.621	N/A	N/A	Target Compound	516262	1.8	1.79	-0.01	M-H	248.05	12.621	-1.0185	True	0.695	1	2820617	Method	N/A	N/A		PPB	Pass	Pass	Pass	N/A	Pass	60.592	3 of 5	N/A	N/A
149	Processed	191107-149	Unknown		False	H20 402									Confirmed	C10[13]CH11N2[15]NO2S	SCNBimaneIS	250.05	2820617	1	1	N/A	Internal Standard	677993	1.8	1.79	-0.01	M-H	250.05	1	-0.6783	True	N/A	N/A	N/A	Method	N/A	N/A			Pass	Pass	Pass	N/A	Pass	100	5 of 6	N/A	N/A
150	Processed	191107-150	Unknown		False	H20 403									Identified	C11H11N3O2S	SCNBimane	248.05	2070823	14.503	N/A	N/A	Target Compound	555149	1.8	1.79	-0.01	M-H	248.05	14.503	-0.834	True	0.803	1	2577508	Method	N/A	N/A		PPB	Pass	Pass	Fail	N/A	Pass	45.8325	3 of 5	N/A	N/A
150	Processed	191107-150	Unknown		False	H20 403									Confirmed	C10[13]CH11N2[15]NO2S	SCNBimaneIS	250.05	2577508	1	1	N/A	Internal Standard	628477	1.8	1.79	-0.01	M-H	250.05	1	-0.5563	True	N/A	N/A	N/A	Method	N/A	N/A			Pass	Pass	Pass	N/A	Pass	100	5 of 5	N/A	N/A
151	Processed	191107-151	Unknown		False	H20 404									Confirmed	C11H11N3O2S	SCNBimane	248.05	1284056	8.434	N/A	N/A	Target Compound	345180	1.8	1.79	-0.01	M-H	248.05	8.434	-0.8955	True	0.455	1	2821207	Method	N/A	N/A		PPB	Pass	Pass	Pass	N/A	Pass	65.8986	3 of 5	N/A	N/A
151	Processed	191107-151	Unknown		False	H20 404									Confirmed	C10[13]CH11N2[15]NO2S	SCNBimaneIS	250.05	2821207	1	1	N/A	Internal Standard	689921	1.8	1.79	-0.01	M-H	250.05	1	-0.6173	True	N/A	N/A	N/A	Method	N/A	N/A			Pass	Pass	Pass	N/A	Pass	100	5 of 6	N/A	N/A
152	Processed	191107-152	Unknown		False	H20 405									Confirmed	C11H11N3O2S	SCNBimane	248.05	288325	2.166	N/A	N/A	Target Compound	76520	1.8	1.79	-0.01	M-H	248.05	2.166	-0.4649	True	0.095	1	3020191	Method	N/A	N/A		PPB	Pass	Pass	Pass	N/A	Pass	59.7648	2 of 5	N/A	N/A
152	Processed	191107-152	Unknown		False	H20 405									Confirmed	C10[13]CH11N2[15]NO2S	SCNBimaneIS	250.05	3020191	1	1	N/A	Internal Standard	722615	1.8	1.79	-0.01	M-H	250.05	1	-0.5563	True	N/A	N/A	N/A	Method	N/A	N/A			Pass	Pass	Pass	N/A	Pass	100	5 of 6	N/A	N/A
153	Processed	191107-153	Unknown		False	H20 406									Identified	C11H11N3O2S	SCNBimane	248.05	2613696	16.56	N/A	N/A	Target Compound	719585	1.8	1.79	-0.01	M-H	248.05	16.56	-0.7109	True	0.921	1	2836410	Method	N/A	N/A		PPB	Pass	Pass	Fail	N/A	Pass	54.3463	5 of 7	N/A	N/A
153	Processed	191107-153	Unknown		False	H20 406									Confirmed	C10[13]CH11N2[15]NO2S	SCNBimaneIS	250.05	2836410	1	1	N/A	Internal Standard	695016	1.8	1.79	-0.01	M-H	250.05	1	-0.3732	True	N/A	N/A	N/A	Method	N/A	N/A			Pass	Pass	Pass	N/A	Pass	100	5 of 6	N/A	N/A
154	Processed	191107-154	Unknown		False	H20 407									Identified	C11H11N3O2S	SCNBimane	248.05	405093	2.932	N/A	N/A	Target Compound	111401	1.8	1.79	-0.01	M-H	248.05	2.932	-0.834	True	0.139	1	2905659	Method	N/A	N/A		PPB	Pass	Pass	Fail	N/A	Pass	29.3325	3 of 5	N/A	N/A
154	Processed	191107-154	Unknown		False	H20 407									Confirmed	C10[13]CH11N2[15]NO2S	SCNBimaneIS	250.05	2905659	1	1	N/A	Internal Standard	710304	1.8	1.79	-0.01	M-H	250.05	1	-0.8614	True	N/A	N/A	N/A	Method	N/A	N/A			Pass	Pass	Pass	N/A	Pass	100	6 of 6	N/A	N/A
155	Processed	191107-155	Unknown		False	H20 408									Identified	C11H11N3O2S	SCNBimane	248.05	1349021	9.19	N/A	N/A	Target Compound	367081	1.8	1.79	-0.01	M-H	248.05	9.19	-0.7725	True	0.499	1	2706098	Method	N/A	N/A		PPB	Pass	Pass	Fail	N/A	Pass	59.427	3 of 5	N/A	N/A
155	Processed	191107-155	Unknown		False	H20 408									Confirmed	C10[13]CH11N2[15]NO2S	SCNBimaneIS	250.05	2706098	1	1	N/A	Internal Standard	674455	1.8	1.79	-0.01	M-H	250.05	1	-0.4953	True	N/A	N/A	N/A	Method	N/A	N/A			Pass	Pass	Pass	N/A	Pass	100	5 of 5	N/A	N/A
156	Processed	191107-156	Unknown		False	H20 409									Confirmed	C11H11N3O2S	SCNBimane	248.05	3144401	20.027	N/A	N/A	Target Compound	856833	1.8	1.79	-0.01	M-H	248.05	20.027	-0.8955	True	1.12	1	2806395	Method	N/A	N/A		PPB	Pass	Pass	Pass	N/A	Pass	61.8605	4 of 7	N/A	N/A
156	Processed	191107-156	Unknown		False	H20 409									Confirmed	C10[13]CH11N2[15]NO2S	SCNBimaneIS	250.05	2806395	1	1	N/A	Internal Standard	696618	1.8	1.79	-0.01	M-H	250.05	1	-0.5563	True	N/A	N/A	N/A	Method	N/A	N/A			Pass	Pass	Pass	N/A	Pass	100	5 of 5	N/A	N/A
157	Processed	191107-157	Unknown		False	Turbo Vap H20									Confirmed	C11H11N3O2S	SCNBimane	248.05	2040751	12.914	N/A	N/A	Target Compound	556846	1.8	1.79	-0.01	M-H	248.05	12.914	-0.7725	True	0.712	1	2865157	Method	N/A	N/A		PPB	Pass	Pass	Pass	N/A	Pass	61.1917	4 of 6	N/A	N/A
157	Processed	191107-157	Unknown		False	Turbo Vap H20									Confirmed	C10[13]CH11N2[15]NO2S	SCNBimaneIS	250.05	2865157	1	1	N/A	Internal Standard	706021	1.8	1.79	-0.01	M-H	250.05	1	-0.4342	True	N/A	N/A	N/A	Method	N/A	N/A			Pass	Pass	Pass	N/A	Pass	100	5 of 6	N/A	N/A
[truncated: 12 more columns]

## Sheet: Data
	Sample ID	Analyte Area	IS Area	Area Ratio	Calculated Amt (ng/mL)	Concentration Ratio
	Blank	17855	1929689	0.00925279	0.664	0.0139349
	5 ppb	482225	1701810	0.28336	5.44	0.0520882
	10 ppb	833369	1625418	0.512711	9.437	0.0543298
	25 ppb	2403779	1632206	1.47272	26.166	0.0562836
	50 ppb	3875969	1581769	2.4504	43.202	0.0567196
	100 ppb	8593365	1422724	6.04008	105.755	0.0571139
	500 ppb	28642663	1621940	17.6595	308.23	0.0572933
	372	311545	2746040	0.113452	2.48	0.045747
	373	3472287	2571506	1.35029	24.032	0.0561873
	374	904045	2604629	0.347092	6.551	0.052983
	375	729499	2630233	0.277351	5.336	0.0519774
