# Supplementary material for: The determination of thiocyanate in the blood plasma and holding water of Amphiprion clarkii after exposure to cyanide
Source: PeerJ. 2021 Dec 7;9:e12409. doi: 10.7717/peerj.12409 (PMC8663612; doi:10.7717/peerj.12409)
Supplement: Supplemental Information 10 [file peerj-09-12409-s010.xlsx]

## Sheet: All Samples
Acquisition Order	Status	Filename	Sample Type	Level	Excluded	Sample ID	Sample Name	Comments	ColumnHeader1	ColumnHeader2	ColumnHeader3	ColumnHeader4	ColumnHeader5	ColumnHeader6	Confirm	Formula	Compound	Area	Calculated Amt	Theoretical Amt	%Diff	Compound Type	Height	Expected RT	Actual RT	RT Delta	Adduct	Sample Amt	m/z (Expected)	m/z (Apex)	m/z (Delta(ppm))	Active	Response Ratio	ISTD Amt	ISTD Response	Integration Mode	%RSD	%CV	Channel	Final Units	PK	IR	IP	LS	FI	Isotopic Pattern Score (%)	Num Isotopes Matched	Lib Match Name	Library Score (%)
1	Processed	190801-001	Unknown		False	E0204									NotFound		SCNBimane	N/F	N/F	N/A	N/A	Target Compound	N/F	1.8	N/F		N/A	N/F	248.05	N/F	N/F	True	N/F	1	1188346	Method	N/A	N/A		PPB	Fail	N/A	N/A	N/A	N/A	N/A		N/A	N/A
1	Processed	190801-001	Unknown		False	E0204									Confirmed	C10[13]CH11N2[15]NO2S	SCNBimaneIS	1188346	1	1	N/A	Internal Standard	286183	1.8	1.89	0.09	M-H	1	250.05	250.05	0.237	True	N/A	N/A	N/A	Method	N/A	N/A			Pass	Pass	Pass	N/A	Pass	100	3 of 3	N/A	N/A
2	Processed	190801-002	Unknown		False	E0304									Identified	C11H11N3O2S	SCNBimane	8295	0.819	N/A	N/A	Target Compound	3153	1.8	1.87	0.07	M-H	0.819	248.05	248.05	0.8269	True	0.007	1	1128982	Manual	N/A	N/A		PPB	Pass	Pass	Fail	N/A	Fail	100	1 of 1	N/A	N/A
2	Processed	190801-002	Unknown		False	E0304									Confirmed	C10[13]CH11N2[15]NO2S	SCNBimaneIS	1128982	1	1	N/A	Internal Standard	273874	1.8	1.87	0.07	M-H	1	250.05	250.05	0.4811	True	N/A	N/A	N/A	Method	N/A	N/A			Pass	Pass	Pass	N/A	Pass	100	3 of 3	N/A	N/A
3	Processed	190801-003	Unknown		False	A0108									NotFound		SCNBimane	N/F	N/F	N/A	N/A	Target Compound	N/F	1.8	N/F		N/A	N/F	248.05	N/F	N/F	True	N/F	1	1169379	Method	N/A	N/A		PPB	Fail	N/A	N/A	N/A	N/A	N/A		N/A	N/A
3	Processed	190801-003	Unknown		False	A0108									Confirmed	C10[13]CH11N2[15]NO2S	SCNBimaneIS	1169379	1	1	N/A	Internal Standard	304943	1.8	1.86	0.06	M-H	1	250.05	250.05	0.4811	True	N/A	N/A	N/A	Method	N/A	N/A			Pass	Pass	Pass	N/A	Pass	100	3 of 3	N/A	N/A
4	Processed	190801-004	Unknown		False	A0208									Confirmed	C11H11N3O2S	SCNBimane	590781	14.968	N/A	N/A	Target Compound	158121	1.8	1.86	0.06	M-H	14.968	248.05	248.05	0.3963	True	0.513	1	1151289	Method	N/A	N/A		PPB	Pass	Pass	Pass	N/A	Pass	63.5367	2 of 3	N/A	N/A
4	Processed	190801-004	Unknown		False	A0208									Confirmed	C10[13]CH11N2[15]NO2S	SCNBimaneIS	1151289	1	1	N/A	Internal Standard	277842	1.8	1.86	0.06	M-H	1	250.05	250.05	0.4811	True	N/A	N/A	N/A	Method	N/A	N/A			Pass	Pass	Pass	N/A	Pass	100	3 of 3	N/A	N/A
5	Processed	190801-005	Unknown		False	A0308									Identified	C11H11N3O2S	SCNBimane	85661	2.416	N/A	N/A	Target Compound	29189	1.8	1.85	0.05	M-H	2.416	248.05	248.05	0.0272	True	0.064	1	1329332	Method	N/A	N/A		PPB	Pass	Pass	Fail	N/A	Pass	0	1 of 2	N/A	N/A
5	Processed	190801-005	Unknown		False	A0308									Confirmed	C10[13]CH11N2[15]NO2S	SCNBimaneIS	1329332	1	1	N/A	Internal Standard	335639	1.8	1.85	0.05	M-H	1	250.05	250.05	0.4201	True	N/A	N/A	N/A	Method	N/A	N/A			Pass	Pass	Pass	N/A	Pass	98.8765	3 of 4	N/A	N/A
6	Processed	190801-006	Unknown		False	A0408									Confirmed	C11H11N3O2S	SCNBimane	425577	9.767	N/A	N/A	Target Compound	114651	1.8	1.85	0.05	M-H	9.767	248.05	248.05	-0.0343	True	0.327	1	1300673	Method	N/A	N/A		PPB	Pass	Pass	Pass	N/A	Pass	67.0531	2 of 3	N/A	N/A
6	Processed	190801-006	Unknown		False	A0408									Confirmed	C10[13]CH11N2[15]NO2S	SCNBimaneIS	1300673	1	1	N/A	Internal Standard	314685	1.8	1.85	0.05	M-H	1	250.05	250.05	0.4201	True	N/A	N/A	N/A	Method	N/A	N/A			Pass	Pass	Pass	N/A	Pass	98.718	3 of 4	N/A	N/A
7	Processed	190801-007	Unknown		False	A0508									Confirmed	C11H11N3O2S	SCNBimane	802282	14.388	N/A	N/A	Target Compound	215818	1.8	1.86	0.06	M-H	14.388	248.05	248.05	0.2733	True	0.492	1	1629303	Method	N/A	N/A		PPB	Pass	Pass	Pass	N/A	Pass	59.8638	2 of 3	N/A	N/A
7	Processed	190801-007	Unknown		False	A0508									Confirmed	C10[13]CH11N2[15]NO2S	SCNBimaneIS	1629303	1	1	N/A	Internal Standard	393423	1.8	1.86	0.06	M-H	1	250.05	250.05	0.5421	True	N/A	N/A	N/A	Method	N/A	N/A			Pass	Pass	Pass	N/A	Pass	91.9571	3 of 5	N/A	N/A
8	Processed	190801-008	Unknown		False	A0608									Confirmed	C11H11N3O2S	SCNBimane	1248870	22.126	N/A	N/A	Target Compound	311347	1.8	1.86	0.06	M-H	22.126	248.05	248.05	-0.0343	True	0.769	1	1623974	Method	N/A	N/A		PPB	Pass	Pass	Pass	N/A	Pass	61.2733	3 of 5	N/A	N/A
8	Processed	190801-008	Unknown		False	A0608									Confirmed	C10[13]CH11N2[15]NO2S	SCNBimaneIS	1623974	1	1	N/A	Internal Standard	401220	1.8	1.86	0.06	M-H	1	250.05	250.05	0.176	True	N/A	N/A	N/A	Method	N/A	N/A			Pass	Pass	Pass	N/A	Pass	92.1283	3 of 5	N/A	N/A
9	Processed	190801-009	Unknown		False	A0708									Identified	C11H11N3O2S	SCNBimane	888057	14.537	N/A	N/A	Target Compound	231111	1.8	1.85	0.05	M-H	14.537	248.05	248.05	0.4578	True	0.498	1	1784277	Method	N/A	N/A		PPB	Pass	Pass	Fail	N/A	Pass	58.5999	2 of 4	N/A	N/A
9	Processed	190801-009	Unknown		False	A0708									Confirmed	C10[13]CH11N2[15]NO2S	SCNBimaneIS	1784277	1	1	N/A	Internal Standard	429581	1.8	1.85	0.05	M-H	1	250.05	250.05	0.5421	True	N/A	N/A	N/A	Method	N/A	N/A			Pass	Pass	Pass	N/A	Pass	92.221	3 of 5	N/A	N/A
10	Processed	190801-010	Unknown		False	A0808									Confirmed	C11H11N3O2S	SCNBimane	960046	16.568	N/A	N/A	Target Compound	239553	1.8	1.86	0.06	M-H	16.568	248.05	248.05	0.1503	True	0.57	1	1683306	Method	N/A	N/A		PPB	Pass	Pass	Pass	N/A	Pass	59.5876	2 of 4	N/A	N/A
10	Processed	190801-010	Unknown		False	A0808									Confirmed	C10[13]CH11N2[15]NO2S	SCNBimaneIS	1683306	1	1	N/A	Internal Standard	405593	1.8	1.86	0.06	M-H	1	250.05	250.05	0.359	True	N/A	N/A	N/A	Method	N/A	N/A			Pass	Pass	Pass	N/A	Pass	91.8795	3 of 5	N/A	N/A
11	Processed	190801-011	Unknown		False	A0908									Confirmed	C11H11N3O2S	SCNBimane	2622930	42.188	N/A	N/A	Target Compound	659748	1.8	1.86	0.06	M-H	42.188	248.05	248.05	0.1503	True	1.486	1	1764851	Method	N/A	N/A		PPB	Pass	Pass	Pass	N/A	Pass	71.2631	3 of 5	N/A	N/A
11	Processed	190801-011	Unknown		False	A0908									Confirmed	C10[13]CH11N2[15]NO2S	SCNBimaneIS	1764851	1	1	N/A	Internal Standard	431791	1.8	1.86	0.06	M-H	1	250.05	250.05	0.4201	True	N/A	N/A	N/A	Method	N/A	N/A			Pass	Pass	Pass	N/A	Pass	92.2048	3 of 5	N/A	N/A
12	Processed	190801-012	Unknown		False	A1008									Confirmed	C11H11N3O2S	SCNBimane	2029039	35.649	N/A	N/A	Target Compound	510243	1.8	1.86	0.06	M-H	35.649	248.05	248.05	0.3348	True	1.252	1	1620084	Method	N/A	N/A		PPB	Pass	Pass	Pass	N/A	Pass	66.6521	3 of 6	N/A	N/A
12	Processed	190801-012	Unknown		False	A1008									Confirmed	C10[13]CH11N2[15]NO2S	SCNBimaneIS	1620084	1	1	N/A	Internal Standard	383963	1.8	1.87	0.07	M-H	1	250.05	250.05	0.5421	True	N/A	N/A	N/A	Method	N/A	N/A			Pass	Pass	Pass	N/A	Pass	92.0645	3 of 5	N/A	N/A
13	Processed	190801-013	Unknown		False	B0108									Confirmed	C11H11N3O2S	SCNBimane	14818875	235.471	N/A	N/A	Target Compound	3743693	1.8	1.86	0.06	M-H	235.471	248.05	248.05	-0.1573	True	8.396	1	1765068	Method	N/A	N/A		PPB	Pass	Pass	Pass	N/A	Pass	100	7 of 8	N/A	N/A
13	Processed	190801-013	Unknown		False	B0108									Confirmed	C10[13]CH11N2[15]NO2S	SCNBimaneIS	1765068	1	1	N/A	Internal Standard	426405	1.8	1.86	0.06	M-H	1	250.05	250.05	0.176	True	N/A	N/A	N/A	Method	N/A	N/A			Pass	Pass	Pass	N/A	Pass	92.1626	3 of 5	N/A	N/A
14	Processed	190801-014	Unknown		False	B0208									Confirmed	C11H11N3O2S	SCNBimane	15137313	252.366	N/A	N/A	Target Compound	3788378	1.8	1.86	0.06	M-H	252.366	248.05	248.05	0.3348	True	9	1	1681999	Method	N/A	N/A		PPB	Pass	Pass	Pass	N/A	Pass	100	6 of 7	N/A	N/A
14	Processed	190801-014	Unknown		False	B0208									Confirmed	C10[13]CH11N2[15]NO2S	SCNBimaneIS	1681999	1	1	N/A	Internal Standard	404565	1.8	1.86	0.06	M-H	1	250.05	250.05	0.4201	True	N/A	N/A	N/A	Method	N/A	N/A			Pass	Pass	Pass	N/A	Pass	91.5813	3 of 5	N/A	N/A
15	Processed	190801-015	Unknown		False	B0308									Confirmed	C11H11N3O2S	SCNBimane	17378112	285.735	N/A	N/A	Target Compound	4371069	1.8	1.86	0.06	M-H	285.735	248.05	248.05	0.1503	True	10.192	1	1704996	Method	N/A	N/A		PPB	Pass	Pass	Pass	N/A	Pass	100	6 of 7	N/A	N/A
15	Processed	190801-015	Unknown		False	B0308									Confirmed	C10[13]CH11N2[15]NO2S	SCNBimaneIS	1704996	1	1	N/A	Internal Standard	405052	1.8	1.86	0.06	M-H	1	250.05	250.05	0.5421	True	N/A	N/A	N/A	Method	N/A	N/A			Pass	Pass	Pass	N/A	Pass	91.8601	3 of 5	N/A	N/A
16	Processed	190801-016	Unknown		False	C0108									NotFound		SCNBimane	N/F	N/F	N/A	N/A	Target Compound	N/F	1.8	N/F		N/A	N/F	248.05	N/F	N/F	True	N/F	1	1893368	Method	N/A	N/A		PPB	Fail	N/A	N/A	N/A	N/A	N/A		N/A	N/A
16	Processed	190801-016	Unknown		False	C0108									Confirmed	C10[13]CH11N2[15]NO2S	SCNBimaneIS	1893368	1	1	N/A	Internal Standard	444138	1.8	1.86	0.06	M-H	1	250.05	250.05	0.4811	True	N/A	N/A	N/A	Method	N/A	N/A			Pass	Pass	Pass	N/A	Pass	92.2644	3 of 5	N/A	N/A
17	Processed	190801-017	Unknown		False	C0208									NotFound		SCNBimane	N/F	N/F	N/A	N/A	Target Compound	N/F	1.8	N/F		N/A	N/F	248.05	N/F	N/F	True	N/F	1	2056872	Method	N/A	N/A		PPB	Fail	N/A	N/A	N/A	N/A	N/A		N/A	N/A
17	Processed	190801-017	Unknown		False	C0208									Confirmed	C10[13]CH11N2[15]NO2S	SCNBimaneIS	2056872	1	1	N/A	Internal Standard	488378	1.8	1.86	0.06	M-H	1	250.05	250.05	0.115	True	N/A	N/A	N/A	Method	N/A	N/A			Pass	Pass	Pass	N/A	Pass	100	5 of 5	N/A	N/A
18	Processed	190801-018	Unknown		False	C0308									NotFound		SCNBimane	N/F	N/F	N/A	N/A	Target Compound	N/F	1.8	N/F		N/A	N/F	248.05	N/F	N/F	True	N/F	1	1982251	Method	N/A	N/A		PPB	Fail	N/A	N/A	N/A	N/A	N/A		N/A	N/A
18	Processed	190801-018	Unknown		False	C0308									Confirmed	C10[13]CH11N2[15]NO2S	SCNBimaneIS	1982251	1	1	N/A	Internal Standard	476904	1.8	1.87	0.07	M-H	1	250.05	250.05	0.4811	True	N/A	N/A	N/A	Method	N/A	N/A			Pass	Pass	Pass	N/A	Pass	92.2566	3 of 5	N/A	N/A
19	Processed	190801-019	Unknown		False	D0108									Confirmed	C11H11N3O2S	SCNBimane	19559967	322.098	N/A	N/A	Target Compound	4932647	1.8	1.87	0.07	M-H	322.098	248.05	248.05	0.2733	True	11.492	1	1702001	Method	N/A	N/A		PPB	Pass	Pass	Pass	N/A	Pass	100	6 of 8	N/A	N/A
19	Processed	190801-019	Unknown		False	D0108									Confirmed	C10[13]CH11N2[15]NO2S	SCNBimaneIS	1702001	1	1	N/A	Internal Standard	412730	1.8	1.87	0.07	M-H	1	250.05	250.05	0.237	True	N/A	N/A	N/A	Method	N/A	N/A			Pass	Pass	Pass	N/A	Pass	90.2242	3 of 5	N/A	N/A
20	Processed	190801-020	Unknown		False	D0208									Confirmed	C11H11N3O2S	SCNBimane	18920236	323.014	N/A	N/A	Target Compound	4699925	1.8	1.87	0.07	M-H	323.014	248.05	248.05	0.3963	True	11.525	1	1641657	Method	N/A	N/A		PPB	Pass	Pass	Pass	N/A	Pass	100	6 of 8	N/A	N/A
20	Processed	190801-020	Unknown		False	D0208									Confirmed	C10[13]CH11N2[15]NO2S	SCNBimaneIS	1641657	1	1	N/A	Internal Standard	400846	1.8	1.87	0.07	M-H	1	250.05	250.05	0.7862	True	N/A	N/A	N/A	Method	N/A	N/A			Pass	Pass	Pass	N/A	Pass	91.597	3 of 5	N/A	N/A
21	Processed	190801-021	Unknown		False	D0308									Confirmed	C11H11N3O2S	SCNBimane	18688993	311.121	N/A	N/A	Target Compound	4684531	1.8	1.87	0.07	M-H	311.121	248.05	248.05	0.0888	True	11.1	1	1683701	Method	N/A	N/A		PPB	Pass	Pass	Pass	N/A	Pass	100	6 of 9	N/A	N/A
21	Processed	190801-021	Unknown		False	D0308									Identified	C10[13]CH11N2[15]NO2S	SCNBimaneIS	1683701	1	1	N/A	Internal Standard	416177	1.8	1.87	0.07	M-H	1	250.05	250.05	0.359	True	N/A	N/A	N/A	Method	N/A	N/A			Pass	Pass	Pass	N/A	Fail	96.6372	3 of 5	N/A	N/A
22	Processed	190801-022	Unknown		False	E0108									NotFound		SCNBimane	N/F	N/F	N/A	N/A	Target Compound	N/F	1.8	N/F		N/A	N/F	248.05	N/F	N/F	True	N/F	1	2001298	Method	N/A	N/A		PPB	Fail	N/A	N/A	N/A	N/A	N/A		N/A	N/A
22	Processed	190801-022	Unknown		False	E0108									Confirmed	C10[13]CH11N2[15]NO2S	SCNBimaneIS	2001298	1	1	N/A	Internal Standard	481437	1.8	1.87	0.07	M-H	1	250.05	250.05	0.4201	True	N/A	N/A	N/A	Method	N/A	N/A			Pass	Pass	Pass	N/A	Pass	98.7429	4 of 5	N/A	N/A
23	Processed	190801-023	Unknown		False	E0208									Identified	C11H11N3O2S	SCNBimane	10566	0.77	N/A	N/A	Target Compound	2958	1.8	1.88	0.08	M-H	0.77	248.05	248.05	0.1503	True	0.006	1	1889180	Method	N/A	N/A		PPB	Pass	Pass	Fail	N/A	Fail	100	1 of 1	N/A	N/A
23	Processed	190801-023	Unknown		False	E0208									Confirmed	C10[13]CH11N2[15]NO2S	SCNBimaneIS	1889180	1	1	N/A	Internal Standard	468662	1.8	1.87	0.07	M-H	1	250.05	250.05	0.4811	True	N/A	N/A	N/A	Method	N/A	N/A			Pass	Pass	Pass	N/A	Pass	96.1683	4 of 5	N/A	N/A
24	Processed	190801-024	Unknown		False	E0308									NotFound		SCNBimane	N/F	N/F	N/A	N/A	Target Compound	N/F	1.8	N/F		N/A	N/F	248.05	N/F	N/F	True	N/F	1	1818158	Method	N/A	N/A		PPB	Fail	N/A	N/A	N/A	N/A	N/A		N/A	N/A
24	Processed	190801-024	Unknown		False	E0308									Confirmed	C10[13]CH11N2[15]NO2S	SCNBimaneIS	1818158	1	1	N/A	Internal Standard	442759	1.8	1.87	0.07	M-H	1	250.05	250.051	1.0913	True	N/A	N/A	N/A	Method	N/A	N/A			Pass	Pass	Pass	N/A	Pass	92.0628	3 of 5	N/A	N/A
25	Processed	190801-025	Unknown		False	A0116									NotFound		SCNBimane	N/F	N/F	N/A	N/A	Target Compound	N/F	1.8	N/F		N/A	N/F	248.05	N/F	N/F	True	N/F	1	1762907	Method	N/A	N/A		PPB	Fail	N/A	N/A	N/A	N/A	N/A		N/A	N/A
25	Processed	190801-025	Unknown		False	A0116									Confirmed	C10[13]CH11N2[15]NO2S	SCNBimaneIS	1762907	1	1	N/A	Internal Standard	428540	1.8	1.87	0.07	M-H	1	250.05	250.05	0.6642	True	N/A	N/A	N/A	Method	N/A	N/A			Pass	Pass	Pass	N/A	Pass	91.9811	3 of 5	N/A	N/A
26	Processed	190801-026	Unknown		False	5 ppbSTD									Identified	C11H11N3O2S	SCNBimane	582780	7.415	N/A	N/A	Target Compound	150972	1.8	1.87	0.07	M-H	7.415	248.05	248.05	1.0115	True	0.243	1	2396910	Method	N/A	N/A		PPB	Pass	Pass	Fail	N/A	Pass	48.104	3 of 5	N/A	N/A
26	Processed	190801-026	Unknown		False	5 ppbSTD									Confirmed	C10[13]CH11N2[15]NO2S	SCNBimaneIS	2396910	1	1	N/A	Internal Standard	570093	1.8	1.87	0.07	M-H	1	250.05	250.051	1.1523	True	N/A	N/A	N/A	Method	N/A	N/A			Pass	Pass	Pass	N/A	Pass	95.9724	4 of 5	N/A	N/A
27	Processed	190801-027	Unknown		False	A0216									NotFound		SCNBimane	N/F	N/F	N/A	N/A	Target Compound	N/F	1.8	N/F		N/A	N/F	248.05	N/F	N/F	True	N/F	1	1881444	Method	N/A	N/A		PPB	Fail	N/A	N/A	N/A	N/A	N/A		N/A	N/A
27	Processed	190801-027	Unknown		False	A0216									Confirmed	C10[13]CH11N2[15]NO2S	SCNBimaneIS	1881444	1	1	N/A	Internal Standard	458457	1.8	1.87	0.07	M-H	1	250.05	250.05	0.7252	True	N/A	N/A	N/A	Method	N/A	N/A			Pass	Pass	Pass	N/A	Pass	92.0004	3 of 5	N/A	N/A
28	Processed	190801-028	Unknown		False	A0316									NotFound		SCNBimane	N/F	N/F	N/A	N/A	Target Compound	N/F	1.8	N/F		N/A	N/F	248.05	N/F	N/F	True	N/F	1	1765100	Method	N/A	N/A		PPB	Fail	N/A	N/A	N/A	N/A	N/A		N/A	N/A
28	Processed	190801-028	Unknown		False	A0316									Confirmed	C10[13]CH11N2[15]NO2S	SCNBimaneIS	1765100	1	1	N/A	Internal Standard	417189	1.8	1.87	0.07	M-H	1	250.05	250.051	1.0913	True	N/A	N/A	N/A	Method	N/A	N/A			Pass	Pass	Pass	N/A	Pass	91.7701	3 of 5	N/A	N/A
29	Processed	190801-029	Unknown		False	A0416									NotFound		SCNBimane	N/F	N/F	N/A	N/A	Target Compound	N/F	1.8	N/F		N/A	N/F	248.05	N/F	N/F	True	N/F	1	1935927	Method	N/A	N/A		PPB	Fail	N/A	N/A	N/A	N/A	N/A		N/A	N/A
29	Processed	190801-029	Unknown		False	A0416									Confirmed	C10[13]CH11N2[15]NO2S	SCNBimaneIS	1935927	1	1	N/A	Internal Standard	464582	1.8	1.87	0.07	M-H	1	250.05	250.051	0.9693	True	N/A	N/A	N/A	Method	N/A	N/A			Pass	Pass	Pass	N/A	Pass	91.8988	3 of 5	N/A	N/A
30	Processed	190801-030	Unknown		False	A0516									NotFound		SCNBimane	N/F	N/F	N/A	N/A	Target Compound	N/F	1.8	N/F		N/A	N/F	248.05	N/F	N/F	True	N/F	1	1962922	Method	N/A	N/A		PPB	Fail	N/A	N/A	N/A	N/A	N/A		N/A	N/A
30	Processed	190801-030	Unknown		False	A0516									Confirmed	C10[13]CH11N2[15]NO2S	SCNBimaneIS	1962922	1	1	N/A	Internal Standard	475946	1.8	1.87	0.07	M-H	1	250.05	250.05	0.8472	True	N/A	N/A	N/A	Method	N/A	N/A			Pass	Pass	Pass	N/A	Pass	96.123	4 of 5	N/A	N/A
31	Processed	190801-031	Unknown		False	A0616									NotFound		SCNBimane	N/F	N/F	N/A	N/A	Target Compound	N/F	1.8	N/F		N/A	N/F	248.05	N/F	N/F	True	N/F	1	2118107	Method	N/A	N/A		PPB	Fail	N/A	N/A	N/A	N/A	N/A		N/A	N/A
31	Processed	190801-031	Unknown		False	A0616									Confirmed	C10[13]CH11N2[15]NO2S	SCNBimaneIS	2118107	1	1	N/A	Internal Standard	515669	1.8	1.87	0.07	M-H	1	250.05	250.05	0.6642	True	N/A	N/A	N/A	Method	N/A	N/A			Pass	Pass	Pass	N/A	Pass	96.2081	4 of 5	N/A	N/A
32	Processed	190801-032	Unknown		False	A0716									NotFound		SCNBimane	N/F	N/F	N/A	N/A	Target Compound	N/F	1.8	N/F		N/A	N/F	248.05	N/F	N/F	True	N/F	1	2198204	Method	N/A	N/A		PPB	Fail	N/A	N/A	N/A	N/A	N/A		N/A	N/A
32	Processed	190801-032	Unknown		False	A0716									Confirmed	C10[13]CH11N2[15]NO2S	SCNBimaneIS	2198204	1	1	N/A	Internal Standard	529754	1.8	1.87	0.07	M-H	1	250.05	250.05	0.5421	True	N/A	N/A	N/A	Method	N/A	N/A			Pass	Pass	Pass	N/A	Pass	98.8041	4 of 5	N/A	N/A
33	Processed	190801-033	Unknown		False	A0816									NotFound		SCNBimane	N/F	N/F	N/A	N/A	Target Compound	N/F	1.8	N/F		N/A	N/F	248.05	N/F	N/F	True	N/F	1	2103341	Method	N/A	N/A		PPB	Fail	N/A	N/A	N/A	N/A	N/A		N/A	N/A
33	Processed	190801-033	Unknown		False	A0816									Confirmed	C10[13]CH11N2[15]NO2S	SCNBimaneIS	2103341	1	1	N/A	Internal Standard	520846	1.8	1.87	0.07	M-H	1	250.05	250.05	0.7252	True	N/A	N/A	N/A	Method	N/A	N/A			Pass	Pass	Pass	N/A	Pass	92.1012	3 of 5	N/A	N/A
34	Processed	190801-034	Unknown		False	A0916									Confirmed	C11H11N3O2S	SCNBimane	592345	8.693	N/A	N/A	Target Compound	158596	1.8	1.87	0.07	M-H	8.693	248.05	248.05	0.5809	True	0.289	1	2051031	Method	N/A	N/A		PPB	Pass	Pass	Pass	N/A	Pass	74.4493	2 of 4	N/A	N/A
34	Processed	190801-034	Unknown		False	A0916									Confirmed	C10[13]CH11N2[15]NO2S	SCNBimaneIS	2051031	1	1	N/A	Internal Standard	484103	1.8	1.87	0.07	M-H	1	250.05	250.05	0.6642	True	N/A	N/A	N/A	Method	N/A	N/A			Pass	Pass	Pass	N/A	Pass	98.6136	4 of 5	N/A	N/A
35	Processed	190801-035	Unknown		False	A1016									Confirmed	C11H11N3O2S	SCNBimane	1059208	16.321	N/A	N/A	Target Compound	277371	1.8	1.87	0.07	M-H	16.321	248.05	248.05	0.7654	True	0.562	1	1886370	Method	N/A	N/A		PPB	Pass	Pass	Pass	N/A	Pass	75.5508	3 of 4	N/A	N/A
35	Processed	190801-035	Unknown		False	A1016									Confirmed	C10[13]CH11N2[15]NO2S	SCNBimaneIS	1886370	1	1	N/A	Internal Standard	457315	1.8	1.87	0.07	M-H	1	250.05	250.05	0.8472	True	N/A	N/A	N/A	Method	N/A	N/A			Pass	Pass	Pass	N/A	Pass	91.9049	3 of 5	N/A	N/A
36	Processed	190801-036	Unknown		False	B0116									Confirmed	C11H11N3O2S	SCNBimane	16173448	284.165	N/A	N/A	Target Compound	4174379	1.8	1.86	0.06	M-H	284.165	248.05	248.05	0.3963	True	10.136	1	1595596	Method	N/A	N/A		PPB	Pass	Pass	Pass	N/A	Pass	100	7 of 8	N/A	N/A
36	Processed	190801-036	Unknown		False	B0116									Confirmed	C10[13]CH11N2[15]NO2S	SCNBimaneIS	1595596	1	1	N/A	Internal Standard	397074	1.8	1.86	0.06	M-H	1	250.05	250.05	0.7252	True	N/A	N/A	N/A	Method	N/A	N/A			Pass	Pass	Pass	N/A	Pass	90.556	3 of 5	N/A	N/A
37	Processed	190801-037	Unknown		False	B0216									Confirmed	C11H11N3O2S	SCNBimane	13719472	195.363	N/A	N/A	Target Compound	3552820	1.8	1.86	0.06	M-H	195.363	248.05	248.05	0.3348	True	6.962	1	1970660	Method	N/A	N/A		PPB	Pass	Pass	Pass	N/A	Pass	100	7 of 8	N/A	N/A
37	Processed	190801-037	Unknown		False	B0216									Confirmed	C10[13]CH11N2[15]NO2S	SCNBimaneIS	1970660	1	1	N/A	Internal Standard	481213	1.8	1.86	0.06	M-H	1	250.05	250.05	0.7862	True	N/A	N/A	N/A	Method	N/A	N/A			Pass	Pass	Pass	N/A	Pass	90.9751	3 of 5	N/A	N/A
38	Processed	190801-038	Unknown		False	B0316									Confirmed	C11H11N3O2S	SCNBimane	16689188	230.584	N/A	N/A	Target Compound	4226947	1.8	1.86	0.06	M-H	230.584	248.05	248.05	0.3348	True	8.221	1	2030083	Method	N/A	N/A		PPB	Pass	Pass	Pass	N/A	Pass	100	6 of 7	N/A	N/A
38	Processed	190801-038	Unknown		False	B0316									Confirmed	C10[13]CH11N2[15]NO2S	SCNBimaneIS	2030083	1	1	N/A	Internal Standard	492994	1.8	1.86	0.06	M-H	1	250.05	250.05	0.4811	True	N/A	N/A	N/A	Method	N/A	N/A			Pass	Pass	Pass	N/A	Pass	96.0872	4 of 5	N/A	N/A
39	Processed	190801-039	Unknown		False	C0116									NotFound		SCNBimane	N/F	N/F	N/A	N/A	Target Compound	N/F	1.8	N/F		N/A	N/F	248.05	N/F	N/F	True	N/F	1	2195096	Method	N/A	N/A		PPB	Fail	N/A	N/A	N/A	N/A	N/A		N/A	N/A
39	Processed	190801-039	Unknown		False	C0116									Confirmed	C10[13]CH11N2[15]NO2S	SCNBimaneIS	2195096	1	1	N/A	Internal Standard	542996	1.8	1.87	0.07	M-H	1	250.05	250.05	0.6031	True	N/A	N/A	N/A	Method	N/A	N/A			Pass	Pass	Pass	N/A	Pass	92.0896	3 of 5	N/A	N/A
40	Processed	190801-040	Unknown		False	C0216									NotFound		SCNBimane	N/F	N/F	N/A	N/A	Target Compound	N/F	1.8	N/F		N/A	N/F	248.05	N/F	N/F	True	N/F	1	2163373	Method	N/A	N/A		PPB	Fail	N/A	N/A	N/A	N/A	N/A		N/A	N/A
40	Processed	190801-040	Unknown		False	C0216									Confirmed	C10[13]CH11N2[15]NO2S	SCNBimaneIS	2163373	1	1	N/A	Internal Standard	528639	1.8	1.87	0.07	M-H	1	250.05	250.051	1.0913	True	N/A	N/A	N/A	Method	N/A	N/A			Pass	Pass	Pass	N/A	Pass	92.041	3 of 5	N/A	N/A
41	Processed	190801-041	Unknown		False	C0316									NotFound		SCNBimane	N/F	N/F	N/A	N/A	Target Compound	N/F	1.8	N/F		N/A	N/F	248.05	N/F	N/F	True	N/F	1	2282800	Method	N/A	N/A		PPB	Fail	N/A	N/A	N/A	N/A	N/A		N/A	N/A
41	Processed	190801-041	Unknown		False	C0316									Confirmed	C10[13]CH11N2[15]NO2S	SCNBimaneIS	2282800	1	1	N/A	Internal Standard	557434	1.8	1.87	0.07	M-H	1	250.05	250.05	0.7862	True	N/A	N/A	N/A	Method	N/A	N/A			Pass	Pass	Pass	N/A	Pass	92.113	3 of 5	N/A	N/A
42	Processed	190801-042	Unknown		False	D0116									Confirmed	C11H11N3O2S	SCNBimane	19922540	266.963	N/A	N/A	Target Compound	5209580	1.8	1.87	0.07	M-H	266.963	248.05	248.05	0.7654	True	9.521	1	2092400	Method	N/A	N/A		PPB	Pass	Pass	Pass	N/A	Pass	100	6 of 9	N/A	N/A
42	Processed	190801-042	Unknown		False	D0116									Confirmed	C10[13]CH11N2[15]NO2S	SCNBimaneIS	2092400	1	1	N/A	Internal Standard	524447	1.8	1.87	0.07	M-H	1	250.05	250.051	1.0913	True	N/A	N/A	N/A	Method	N/A	N/A			Pass	Pass	Pass	N/A	Pass	91.3412	3 of 5	N/A	N/A
43	Processed	190801-043	Unknown		False	D0216									Confirmed	C11H11N3O2S	SCNBimane	18122148	231.729	N/A	N/A	Target Compound	4735090	1.8	1.87	0.07	M-H	231.729	248.05	248.05	0.5809	True	8.262	1	2193474	Method	N/A	N/A		PPB	Pass	Pass	Pass	N/A	Pass	100	6 of 8	N/A	N/A
43	Processed	190801-043	Unknown		False	D0216									Confirmed	C10[13]CH11N2[15]NO2S	SCNBimaneIS	2193474	1	1	N/A	Internal Standard	547210	1.8	1.87	0.07	M-H	1	250.05	250.051	1.0913	True	N/A	N/A	N/A	Method	N/A	N/A			Pass	Pass	Pass	N/A	Pass	91.0966	3 of 5	N/A	N/A
44	Processed	190801-044	Unknown		False	D0316									Confirmed	C11H11N3O2S	SCNBimane	21164818	296.505	N/A	N/A	Target Compound	5417868	1.8	1.87	0.07	M-H	296.505	248.05	248.05	0.7039	True	10.577	1	2000935	Method	N/A	N/A		PPB	Pass	Pass	Pass	N/A	Pass	100	6 of 8	N/A	N/A
44	Processed	190801-044	Unknown		False	D0316									Confirmed	C10[13]CH11N2[15]NO2S	SCNBimaneIS	2000935	1	1	N/A	Internal Standard	486579	1.8	1.87	0.07	M-H	1	250.05	250.051	1.0913	True	N/A	N/A	N/A	Method	N/A	N/A			Pass	Pass	Pass	N/A	Pass	91.4765	3 of 5	N/A	N/A
45	Processed	190801-045	Unknown		False	E0116									NotFound		SCNBimane	N/F	N/F	N/A	N/A	Target Compound	N/F	1.8	N/F		N/A	N/F	248.05	N/F	N/F	True	N/F	1	2302065	Method	N/A	N/A		PPB	Fail	N/A	N/A	N/A	N/A	N/A		N/A	N/A
45	Processed	190801-045	Unknown		False	E0116									Confirmed	C10[13]CH11N2[15]NO2S	SCNBimaneIS	2302065	1	1	N/A	Internal Standard	567119	1.8	1.87	0.07	M-H	1	250.05	250.05	0.7252	True	N/A	N/A	N/A	Method	N/A	N/A			Pass	Pass	Pass	N/A	Pass	96.2578	4 of 5	N/A	N/A
46	Processed	190801-046	Unknown		False	E0216									NotFound		SCNBimane	N/F	N/F	N/A	N/A	Target Compound	N/F	1.8	N/F		N/A	N/F	248.05	N/F	N/F	True	N/F	1	2256872	Method	N/A	N/A		PPB	Fail	N/A	N/A	N/A	N/A	N/A		N/A	N/A
46	Processed	190801-046	Unknown		False	E0216									Confirmed	C10[13]CH11N2[15]NO2S	SCNBimaneIS	2256872	1	1	N/A	Internal Standard	548446	1.8	1.88	0.08	M-H	1	250.05	250.05	0.8472	True	N/A	N/A	N/A	Method	N/A	N/A			Pass	Pass	Pass	N/A	Pass	96.1957	4 of 5	N/A	N/A
47	Processed	190801-047	Unknown		False	E0316									NotFound		SCNBimane	N/F	N/F	N/A	N/A	Target Compound	N/F	1.8	N/F		N/A	N/F	248.05	N/F	N/F	True	N/F	1	2129306	Method	N/A	N/A		PPB	Fail	N/A	N/A	N/A	N/A	N/A		N/A	N/A
47	Processed	190801-047	Unknown		False	E0316									Confirmed	C10[13]CH11N2[15]NO2S	SCNBimaneIS	2129306	1	1	N/A	Internal Standard	528892	1.8	1.87	0.07	M-H	1	250.05	250.05	0.7862	True	N/A	N/A	N/A	Method	N/A	N/A			Pass	Pass	Pass	N/A	Pass	91.983	3 of 5	N/A	N/A
48	Processed	190801-048	Unknown		False	Blank									NotFound		SCNBimane	N/F	N/F	N/A	N/A	Target Compound	N/F	1.8	N/F		N/A	N/F	248.05	N/F	N/F	True	N/F	1	2965441	Method	N/A	N/A		PPB	Fail	N/A	N/A	N/A	N/A	N/A		N/A	N/A
48	Processed	190801-048	Unknown		False	Blank									Confirmed	C10[13]CH11N2[15]NO2S	SCNBimaneIS	2965441	1	1	N/A	Internal Standard	700309	1.8	1.87	0.07	M-H	1	250.05	250.05	0.6642	True	N/A	N/A	N/A	Method	N/A	N/A			Pass	Pass	Pass	N/A	Pass	100	5 of 5	N/A	N/A
49	Processed	190801-049	Unknown		False	A0124									NotFound		SCNBimane	N/F	N/F	N/A	N/A	Target Compound	N/F	1.8	N/F		N/A	N/F	248.05	N/F	N/F	True	N/F	1	2598620	Method	N/A	N/A		PPB	Fail	N/A	N/A	N/A	N/A	N/A		N/A	N/A
49	Processed	190801-049	Unknown		False	A0124									Confirmed	C10[13]CH11N2[15]NO2S	SCNBimaneIS	2598620	1	1	N/A	Internal Standard	632902	1.8	1.87	0.07	M-H	1	250.05	250.05	0.9083	True	N/A	N/A	N/A	Method	N/A	N/A			Pass	Pass	Pass	N/A	Pass	95.8181	4 of 5	N/A	N/A
50	Processed	190801-050	Unknown		False	A0224									NotFound		SCNBimane	N/F	N/F	N/A	N/A	Target Compound	N/F	1.8	N/F		N/A	N/F	248.05	N/F	N/F	True	N/F	1	2446739	Method	N/A	N/A		PPB	Fail	N/A	N/A	N/A	N/A	N/A		N/A	N/A
50	Processed	190801-050	Unknown		False	A0224									Confirmed	C10[13]CH11N2[15]NO2S	SCNBimaneIS	2446739	1	1	N/A	Internal Standard	614540	1.8	1.87	0.07	M-H	1	250.05	250.05	0.4811	True	N/A	N/A	N/A	Method	N/A	N/A			Pass	Pass	Pass	N/A	Pass	100	5 of 5	N/A	N/A
51	Processed	190801-051	Unknown		False	A0324									NotFound		SCNBimane	N/F	N/F	N/A	N/A	Target Compound	N/F	1.8	N/F		N/A	N/F	248.05	N/F	N/F	True	N/F	1	2404114	Method	N/A	N/A		PPB	Fail	N/A	N/A	N/A	N/A	N/A		N/A	N/A
51	Processed	190801-051	Unknown		False	A0324									Confirmed	C10[13]CH11N2[15]NO2S	SCNBimaneIS	2404114	1	1	N/A	Internal Standard	594893	1.8	1.87	0.07	M-H	1	250.05	250.05	0.6642	True	N/A	N/A	N/A	Method	N/A	N/A			Pass	Pass	Pass	N/A	Pass	92.1225	3 of 5	N/A	N/A
52	Processed	190801-052	Unknown		False	A0424									NotFound		SCNBimane	N/F	N/F	N/A	N/A	Target Compound	N/F	1.8	N/F		N/A	N/F	248.05	N/F	N/F	True	N/F	1	2466808	Method	N/A	N/A		PPB	Fail	N/A	N/A	N/A	N/A	N/A		N/A	N/A
52	Processed	190801-052	Unknown		False	A0424									Confirmed	C10[13]CH11N2[15]NO2S	SCNBimaneIS	2466808	1	1	N/A	Internal Standard	589229	1.8	1.87	0.07	M-H	1	250.05	250.05	0.7862	True	N/A	N/A	N/A	Method	N/A	N/A			Pass	Pass	Pass	N/A	Pass	100	5 of 5	N/A	N/A
53	Processed	190801-053	Unknown		False	A0524									NotFound		SCNBimane	N/F	N/F	N/A	N/A	Target Compound	N/F	1.8	N/F		N/A	N/F	248.05	N/F	N/F	True	N/F	1	2728548	Method	N/A	N/A		PPB	Fail	N/A	N/A	N/A	N/A	N/A		N/A	N/A
53	Processed	190801-053	Unknown		False	A0524									Confirmed	C10[13]CH11N2[15]NO2S	SCNBimaneIS	2728548	1	1	N/A	Internal Standard	667441	1.8	1.88	0.08	M-H	1	250.05	250.05	0.6642	True	N/A	N/A	N/A	Method	N/A	N/A			Pass	Pass	Pass	N/A	Pass	98.5996	4 of 5	N/A	N/A
54	Processed	190801-054	Unknown		False	A0624									NotFound		SCNBimane	N/F	N/F	N/A	N/A	Target Compound	N/F	1.8	N/F		N/A	N/F	248.05	N/F	N/F	True	N/F	1	2291502	Method	N/A	N/A		PPB	Fail	N/A	N/A	N/A	N/A	N/A		N/A	N/A
54	Processed	190801-054	Unknown		False	A0624									Confirmed	C10[13]CH11N2[15]NO2S	SCNBimaneIS	2291502	1	1	N/A	Internal Standard	556147	1.8	1.88	0.08	M-H	1	250.05	250.051	1.0913	True	N/A	N/A	N/A	Method	N/A	N/A			Pass	Pass	Pass	N/A	Pass	91.8612	3 of 5	N/A	N/A
55	Processed	190801-055	Unknown		False	A0724									NotFound		SCNBimane	N/F	N/F	N/A	N/A	Target Compound	N/F	1.8	N/F		N/A	N/F	248.05	N/F	N/F	True	N/F	1	2474669	Method	N/A	N/A		PPB	Fail	N/A	N/A	N/A	N/A	N/A		N/A	N/A
55	Processed	190801-055	Unknown		False	A0724									Confirmed	C10[13]CH11N2[15]NO2S	SCNBimaneIS	2474669	1	1	N/A	Internal Standard	604780	1.8	1.88	0.08	M-H	1	250.05	250.05	0.7862	True	N/A	N/A	N/A	Method	N/A	N/A			Pass	Pass	Pass	N/A	Pass	91.961	3 of 5	N/A	N/A
56	Processed	190801-056	Unknown		False	A0824									NotFound		SCNBimane	N/F	N/F	N/A	N/A	Target Compound	N/F	1.8	N/F		N/A	N/F	248.05	N/F	N/F	True	N/F	1	2445753	Method	N/A	N/A		PPB	Fail	N/A	N/A	N/A	N/A	N/A		N/A	N/A
56	Processed	190801-056	Unknown		False	A0824									Confirmed	C10[13]CH11N2[15]NO2S	SCNBimaneIS	2445753	1	1	N/A	Internal Standard	611353	1.8	1.88	0.08	M-H	1	250.05	250.05	0.6642	True	N/A	N/A	N/A	Method	N/A	N/A			Pass	Pass	Pass	N/A	Pass	95.8622	4 of 5	N/A	N/A
57	Processed	190801-057	Unknown		False	A0924									NotFound		SCNBimane	N/F	N/F	N/A	N/A	Target Compound	N/F	1.8	N/F		N/A	N/F	248.05	N/F	N/F	True	N/F	1	2488306	Method	N/A	N/A		PPB	Fail	N/A	N/A	N/A	N/A	N/A		N/A	N/A
57	Processed	190801-057	Unknown		False	A0924									Confirmed	C10[13]CH11N2[15]NO2S	SCNBimaneIS	2488306	1	1	N/A	Internal Standard	622638	1.8	1.88	0.08	M-H	1	250.05	250.05	0.6031	True	N/A	N/A	N/A	Method	N/A	N/A			Pass	Pass	Pass	N/A	Pass	92.1316	3 of 5	N/A	N/A
58	Processed	190801-058	Unknown		False	A1024									NotFound		SCNBimane	N/F	N/F	N/A	N/A	Target Compound	N/F	1.8	N/F		N/A	N/F	248.05	N/F	N/F	True	N/F	1	2372233	Method	N/A	N/A		PPB	Fail	N/A	N/A	N/A	N/A	N/A		N/A	N/A
58	Processed	190801-058	Unknown		False	A1024									Confirmed	C10[13]CH11N2[15]NO2S	SCNBimaneIS	2372233	1	1	N/A	Internal Standard	591090	1.8	1.88	0.08	M-H	1	250.05	250.05	0.5421	True	N/A	N/A	N/A	Method	N/A	N/A			Pass	Pass	Pass	N/A	Pass	92.1446	3 of 5	N/A	N/A
59	Processed	190801-059	Unknown		False	B0124									Confirmed	C11H11N3O2S	SCNBimane	14129610	181.9	N/A	N/A	Target Compound	3645293	1.8	1.88	0.08	M-H	181.9	248.05	248.05	0.5194	True	6.481	1	2180305	Method	N/A	N/A		PPB	Pass	Pass	Pass	N/A	Pass	100	6 of 6	N/A	N/A
59	Processed	190801-059	Unknown		False	B0124									Confirmed	C10[13]CH11N2[15]NO2S	SCNBimaneIS	2180305	1	1	N/A	Internal Standard	521724	1.8	1.88	0.08	M-H	1	250.05	250.051	2.0067	True	N/A	N/A	N/A	Method	N/A	N/A			Pass	Pass	Pass	N/A	Pass	89.3295	3 of 5	N/A	N/A
60	Processed	190801-060	Unknown		False	B0224									Confirmed	C11H11N3O2S	SCNBimane	12753850	180.555	N/A	N/A	Target Compound	3259976	1.8	1.89	0.09	M-H	180.555	248.05	248.05	0.4578	True	6.432	1	1982723	Method	N/A	N/A		PPB	Pass	Pass	Pass	N/A	Pass	93.0167	5 of 6	N/A	N/A
60	Processed	190801-060	Unknown		False	B0224									Confirmed	C10[13]CH11N2[15]NO2S	SCNBimaneIS	1982723	1	1	N/A	Internal Standard	480373	1.8	1.89	0.09	M-H	1	250.05	250.051	1.9456	True	N/A	N/A	N/A	Method	N/A	N/A			Pass	Pass	Pass	N/A	Pass	91.3883	3 of 5	N/A	N/A
61	Processed	190801-061	Unknown		False	B0324									Confirmed	C11H11N3O2S	SCNBimane	12638314	156.43	N/A	N/A	Target Compound	3191028	1.8	1.88	0.08	M-H	156.43	248.05	248.05	0.2118	True	5.57	1	2268969	Method	N/A	N/A		PPB	Pass	Pass	Pass	N/A	Pass	92.5338	5 of 6	N/A	N/A
61	Processed	190801-061	Unknown		False	B0324									Confirmed	C10[13]CH11N2[15]NO2S	SCNBimaneIS	2268969	1	1	N/A	Internal Standard	552515	1.8	1.88	0.08	M-H	1	250.05	250.051	1.8236	True	N/A	N/A	N/A	Method	N/A	N/A			Pass	Pass	Pass	N/A	Pass	91.3248	3 of 5	N/A	N/A
62	Processed	190801-062	Unknown		False	C0124									NotFound		SCNBimane	N/F	N/F	N/A	N/A	Target Compound	N/F	1.8	N/F		N/A	N/F	248.05	N/F	N/F	True	N/F	1	2367154	Method	N/A	N/A		PPB	Fail	N/A	N/A	N/A	N/A	N/A		N/A	N/A
62	Processed	190801-062	Unknown		False	C0124									Confirmed	C10[13]CH11N2[15]NO2S	SCNBimaneIS	2367154	1	1	N/A	Internal Standard	576017	1.8	1.87	0.07	M-H	1	250.05	250.05	0.4811	True	N/A	N/A	N/A	Method	N/A	N/A			Pass	Pass	Pass	N/A	Pass	96.3828	4 of 5	N/A	N/A
63	Processed	190801-063	Unknown		False	C0224									NotFound		SCNBimane	N/F	N/F	N/A	N/A	Target Compound	N/F	1.8	N/F		N/A	N/F	248.05	N/F	N/F	True	N/F	1	2540947	Method	N/A	N/A		PPB	Fail	N/A	N/A	N/A	N/A	N/A		N/A	N/A
63	Processed	190801-063	Unknown		False	C0224									Confirmed	C10[13]CH11N2[15]NO2S	SCNBimaneIS	2540947	1	1	N/A	Internal Standard	624409	1.8	1.87	0.07	M-H	1	250.05	250.05	0.9083	True	N/A	N/A	N/A	Method	N/A	N/A			Pass	Pass	Pass	N/A	Pass	96.2639	4 of 5	N/A	N/A
64	Processed	190801-064	Unknown		False	C0324									NotFound		SCNBimane	N/F	N/F	N/A	N/A	Target Compound	N/F	1.8	N/F		N/A	N/F	248.05	N/F	N/F	True	N/F	1	2457342	Method	N/A	N/A		PPB	Fail	N/A	N/A	N/A	N/A	N/A		N/A	N/A
64	Processed	190801-064	Unknown		False	C0324									Confirmed	C10[13]CH11N2[15]NO2S	SCNBimaneIS	2457342	1	1	N/A	Internal Standard	607499	1.8	1.87	0.07	M-H	1	250.05	250.05	0.6642	True	N/A	N/A	N/A	Method	N/A	N/A			Pass	Pass	Pass	N/A	Pass	92.1876	3 of 5	N/A	N/A
65	Processed	190801-065	Unknown		False	D0124									Confirmed	C11H11N3O2S	SCNBimane	19758862	261.332	N/A	N/A	Target Compound	4893659	1.8	1.87	0.07	M-H	261.332	248.05	248.05	0.5194	True	9.32	1	2120025	Method	N/A	N/A		PPB	Pass	Pass	Pass	N/A	Pass	100	6 of 8	N/A	N/A
65	Processed	190801-065	Unknown		False	D0124									Confirmed	C10[13]CH11N2[15]NO2S	SCNBimaneIS	2120025	1	1	N/A	Internal Standard	514378	1.8	1.88	0.08	M-H	1	250.05	250.051	1.0303	True	N/A	N/A	N/A	Method	N/A	N/A			Pass	Pass	Pass	N/A	Pass	91.4995	3 of 5	N/A	N/A
66	Processed	190801-066	Unknown		False	D0224									Confirmed	C11H11N3O2S	SCNBimane	18847609	252.132	N/A	N/A	Target Compound	4841417	1.8	1.87	0.07	M-H	252.132	248.05	248.05	0.3348	True	8.991	1	2096221	Method	N/A	N/A		PPB	Pass	Pass	Pass	N/A	Pass	100	8 of 8	N/A	N/A
66	Processed	190801-066	Unknown		False	D0224									Confirmed	C10[13]CH11N2[15]NO2S	SCNBimaneIS	2096221	1	1	N/A	Internal Standard	499085	1.8	1.87	0.07	M-H	1	250.05	250.05	0.6642	True	N/A	N/A	N/A	Method	N/A	N/A			Pass	Pass	Pass	N/A	Pass	91.8574	3 of 5	N/A	N/A
67	Processed	190801-067	Unknown		False	D0324									Confirmed	C11H11N3O2S	SCNBimane	20183148	244.859	N/A	N/A	Target Compound	5139136	1.8	1.87	0.07	M-H	244.859	248.05	248.05	0.3348	True	8.731	1	2311605	Method	N/A	N/A		PPB	Pass	Pass	Pass	N/A	Pass	100	7 of 8	N/A	N/A
67	Processed	190801-067	Unknown		False	D0324									Confirmed	C10[13]CH11N2[15]NO2S	SCNBimaneIS	2311605	1	1	N/A	Internal Standard	564908	1.8	1.88	0.08	M-H	1	250.05	250.05	0.7862	True	N/A	N/A	N/A	Method	N/A	N/A			Pass	Pass	Pass	N/A	Pass	91.5239	3 of 5	N/A	N/A
68	Processed	190801-068	Unknown		False	E0124									NotFound		SCNBimane	N/F	N/F	N/A	N/A	Target Compound	N/F	1.8	N/F		N/A	N/F	248.05	N/F	N/F	True	N/F	1	2442457	Method	N/A	N/A		PPB	Fail	N/A	N/A	N/A	N/A	N/A		N/A	N/A
68	Processed	190801-068	Unknown		False	E0124									Confirmed	C10[13]CH11N2[15]NO2S	SCNBimaneIS	2442457	1	1	N/A	Internal Standard	589541	1.8	1.87	0.07	M-H	1	250.05	250.05	0.237	True	N/A	N/A	N/A	Method	N/A	N/A			Pass	Pass	Pass	N/A	Pass	98.9119	4 of 5	N/A	N/A
69	Processed	190801-069	Unknown		False	E0224									NotFound		SCNBimane	N/F	N/F	N/A	N/A	Target Compound	N/F	1.8	N/F		N/A	N/F	248.05	N/F	N/F	True	N/F	1	2400380	Method	N/A	N/A		PPB	Fail	N/A	N/A	N/A	N/A	N/A		N/A	N/A
69	Processed	190801-069	Unknown		False	E0224									Confirmed	C10[13]CH11N2[15]NO2S	SCNBimaneIS	2400380	1	1	N/A	Internal Standard	584315	1.8	1.87	0.07	M-H	1	250.05	250.05	0.5421	True	N/A	N/A	N/A	Method	N/A	N/A			Pass	Pass	Pass	N/A	Pass	98.9052	4 of 5	N/A	N/A
70	Processed	190801-070	Unknown		False	E0324									NotFound		SCNBimane	N/F	N/F	N/A	N/A	Target Compound	N/F	1.8	N/F		N/A	N/F	248.05	N/F	N/F	True	N/F	1	2256210	Method	N/A	N/A		PPB	Fail	N/A	N/A	N/A	N/A	N/A		N/A	N/A
70	Processed	190801-070	Unknown		False	E0324									Confirmed	C10[13]CH11N2[15]NO2S	SCNBimaneIS	2256210	1	1	N/A	Internal Standard	541859	1.8	1.87	0.07	M-H	1	250.05	250.05	0.6642	True	N/A	N/A	N/A	Method	N/A	N/A			Pass	Pass	Pass	N/A	Pass	92.0805	3 of 5	N/A	N/A
71	Processed	190801-071	Unknown		False	E24									NotFound		SCNBimane	N/F	N/F	N/A	N/A	Target Compound	N/F	1.8	N/F		N/A	N/F	248.05	N/F	N/F	True	N/F	1	2359754	Method	N/A	N/A		PPB	Fail	N/A	N/A	N/A	N/A	N/A		N/A	N/A
71	Processed	190801-071	Unknown		False	E24									Confirmed	C10[13]CH11N2[15]NO2S	SCNBimaneIS	2359754	1	1	N/A	Internal Standard	582046	1.8	1.88	0.08	M-H	1	250.05	250.05	0.8472	True	N/A	N/A	N/A	Method	N/A	N/A			Pass	Pass	Pass	N/A	Pass	91.9632	3 of 5	N/A	N/A
72	Processed	190801-072	Unknown		False	5 ppb STD									Confirmed	C11H11N3O2S	SCNBimane	593534	5.592	N/A	N/A	Target Compound	147617	1.8	1.87	0.07	M-H	5.592	248.05	248.05	0.8269	True	0.178	1	3335322	Method	N/A	N/A		PPB	Pass	Pass	Pass	N/A	Pass	62.7831	3 of 5	N/A	N/A
72	Processed	190801-072	Unknown		False	5 ppb STD									Confirmed	C10[13]CH11N2[15]NO2S	SCNBimaneIS	3335322	1	1	N/A	Internal Standard	788224	1.8	1.87	0.07	M-H	1	250.05	250.05	0.7252	True	N/A	N/A	N/A	Method	N/A	N/A			Pass	Pass	Pass	N/A	Pass	100	5 of 5	N/A	N/A
73	Processed	190801-073	Unknown		False	A0124p									NotFound		SCNBimane	N/F	N/F	N/A	N/A	Target Compound	N/F	1.8	N/F		N/A	N/F	248.05	N/F	N/F	True	N/F	1	2550152	Method	N/A	N/A		PPB	Fail	N/A	N/A	N/A	N/A	N/A		N/A	N/A
73	Processed	190801-073	Unknown		False	A0124p									Confirmed	C10[13]CH11N2[15]NO2S	SCNBimaneIS	2550152	1	1	N/A	Internal Standard	613319	1.8	1.87	0.07	M-H	1	250.05	250.05	0.6642	True	N/A	N/A	N/A	Method	N/A	N/A			Pass	Pass	Pass	N/A	Pass	92.1592	3 of 5	N/A	N/A
74	Processed	190801-074	Unknown		False	A0224p									NotFound		SCNBimane	N/F	N/F	N/A	N/A	Target Compound	N/F	1.8	N/F		N/A	N/F	248.05	N/F	N/F	True	N/F	1	2674838	Method	N/A	N/A		PPB	Fail	N/A	N/A	N/A	N/A	N/A		N/A	N/A
74	Processed	190801-074	Unknown		False	A0224p									Confirmed	C10[13]CH11N2[15]NO2S	SCNBimaneIS	2674838	1	1	N/A	Internal Standard	670859	1.8	1.87	0.07	M-H	1	250.05	250.05	0.6031	True	N/A	N/A	N/A	Method	N/A	N/A			Pass	Pass	Pass	N/A	Pass	96.3699	4 of 5	N/A	N/A
75	Processed	190801-075	Unknown		False	A0324p									NotFound		SCNBimane	N/F	N/F	N/A	N/A	Target Compound	N/F	1.8	N/F		N/A	N/F	248.05	N/F	N/F	True	N/F	1	2442244	Method	N/A	N/A		PPB	Fail	N/A	N/A	N/A	N/A	N/A		N/A	N/A
75	Processed	190801-075	Unknown		False	A0324p									Confirmed	C10[13]CH11N2[15]NO2S	SCNBimaneIS	2442244	1	1	N/A	Internal Standard	580347	1.8	1.88	0.08	M-H	1	250.05	250.05	0.359	True	N/A	N/A	N/A	Method	N/A	N/A			Pass	Pass	Pass	N/A	Pass	92.1045	3 of 5	N/A	N/A
76	Processed	190801-076	Unknown		False	A0424p									NotFound		SCNBimane	N/F	N/F	N/A	N/A	Target Compound	N/F	1.8	N/F		N/A	N/F	248.05	N/F	N/F	True	N/F	1	2338408	Method	N/A	N/A		PPB	Fail	N/A	N/A	N/A	N/A	N/A		N/A	N/A
76	Processed	190801-076	Unknown		False	A0424p									Confirmed	C10[13]CH11N2[15]NO2S	SCNBimaneIS	2338408	1	1	N/A	Internal Standard	564371	1.8	1.87	0.07	M-H	1	250.05	250.05	0.8472	True	N/A	N/A	N/A	Method	N/A	N/A			Pass	Pass	Pass	N/A	Pass	92.15	3 of 5	N/A	N/A
77	Processed	190801-077	Unknown		False	A0524p									NotFound		SCNBimane	N/F	N/F	N/A	N/A	Target Compound	N/F	1.8	N/F		N/A	N/F	248.05	N/F	N/F	True	N/F	1	2446617	Method	N/A	N/A		PPB	Fail	N/A	N/A	N/A	N/A	N/A		N/A	N/A
77	Processed	190801-077	Unknown		False	A0524p									Confirmed	C10[13]CH11N2[15]NO2S	SCNBimaneIS	2446617	1	1	N/A	Internal Standard	608614	1.8	1.87	0.07	M-H	1	250.05	250.05	0.7862	True	N/A	N/A	N/A	Method	N/A	N/A			Pass	Pass	Pass	N/A	Pass	92.0256	3 of 5	N/A	N/A
78	Processed	190801-078	Unknown		False	A0624p									NotFound		SCNBimane	N/F	N/F	N/A	N/A	Target Compound	N/F	1.8	N/F		N/A	N/F	248.05	N/F	N/F	True	N/F	1	2449045	Method	N/A	N/A		PPB	Fail	N/A	N/A	N/A	N/A	N/A		N/A	N/A
78	Processed	190801-078	Unknown		False	A0624p									Confirmed	C10[13]CH11N2[15]NO2S	SCNBimaneIS	2449045	1	1	N/A	Internal Standard	597338	1.8	1.87	0.07	M-H	1	250.05	250.05	0.359	True	N/A	N/A	N/A	Method	N/A	N/A			Pass	Pass	Pass	N/A	Pass	92.2226	3 of 5	N/A	N/A
79	Processed	190801-079	Unknown		False	A0724p									NotFound		SCNBimane	N/F	N/F	N/A	N/A	Target Compound	N/F	1.8	N/F		N/A	N/F	248.05	N/F	N/F	True	N/F	1	2349241	Method	N/A	N/A		PPB	Fail	N/A	N/A	N/A	N/A	N/A		N/A	N/A
79	Processed	190801-079	Unknown		False	A0724p									Confirmed	C10[13]CH11N2[15]NO2S	SCNBimaneIS	2349241	1	1	N/A	Internal Standard	569454	1.8	1.87	0.07	M-H	1	250.05	250.05	0.6031	True	N/A	N/A	N/A	Method	N/A	N/A			Pass	Pass	Pass	N/A	Pass	96.2999	4 of 5	N/A	N/A
80	Processed	190801-080	Unknown		False	A0824p									NotFound		SCNBimane	N/F	N/F	N/A	N/A	Target Compound	N/F	1.8	N/F		N/A	N/F	248.05	N/F	N/F	True	N/F	1	2503014	Method	N/A	N/A		PPB	Fail	N/A	N/A	N/A	N/A	N/A		N/A	N/A
80	Processed	190801-080	Unknown		False	A0824p									Confirmed	C10[13]CH11N2[15]NO2S	SCNBimaneIS	2503014	1	1	N/A	Internal Standard	617826	1.8	1.87	0.07	M-H	1	250.05	250.05	0.4811	True	N/A	N/A	N/A	Method	N/A	N/A			Pass	Pass	Pass	N/A	Pass	100	5 of 5	N/A	N/A
81	Processed	190801-081	Unknown		False	A0924p									NotFound		SCNBimane	N/F	N/F	N/A	N/A	Target Compound	N/F	1.8	N/F		N/A	N/F	248.05	N/F	N/F	True	N/F	1	2428538	Method	N/A	N/A		PPB	Fail	N/A	N/A	N/A	N/A	N/A		N/A	N/A
81	Processed	190801-081	Unknown		False	A0924p									Confirmed	C10[13]CH11N2[15]NO2S	SCNBimaneIS	2428538	1	1	N/A	Internal Standard	605639	1.8	1.87	0.07	M-H	1	250.05	250.05	0.6642	True	N/A	N/A	N/A	Method	N/A	N/A			Pass	Pass	Pass	N/A	Pass	96.2978	4 of 5	N/A	N/A
82	Processed	190801-082	Unknown		False	A1024p									NotFound		SCNBimane	N/F	N/F	N/A	N/A	Target Compound	N/F	1.8	N/F		N/A	N/F	248.05	N/F	N/F	True	N/F	1	2282473	Method	N/A	N/A		PPB	Fail	N/A	N/A	N/A	N/A	N/A		N/A	N/A
82	Processed	190801-082	Unknown		False	A1024p									Confirmed	C10[13]CH11N2[15]NO2S	SCNBimaneIS	2282473	1	1	N/A	Internal Standard	543559	1.8	1.87	0.07	M-H	1	250.05	250.05	0.7252	True	N/A	N/A	N/A	Method	N/A	N/A			Pass	Pass	Pass	N/A	Pass	92.0774	3 of 5	N/A	N/A
83	Processed	190801-083	Unknown		False	B0124p									Confirmed	C11H11N3O2S	SCNBimane	14293671	184.882	N/A	N/A	Target Compound	3664940	1.8	1.87	0.07	M-H	184.882	248.05	248.05	0.3348	True	6.587	1	2169928	Method	N/A	N/A		PPB	Pass	Pass	Pass	N/A	Pass	100	6 of 8	N/A	N/A
83	Processed	190801-083	Unknown		False	B0124p									Confirmed	C10[13]CH11N2[15]NO2S	SCNBimaneIS	2169928	1	1	N/A	Internal Standard	529281	1.8	1.87	0.07	M-H	1	250.05	250.051	1.8236	True	N/A	N/A	N/A	Method	N/A	N/A			Pass	Pass	Pass	N/A	Pass	89.6669	3 of 5	N/A	N/A
84	Processed	190801-084	Unknown		False	B0224p									Confirmed	C11H11N3O2S	SCNBimane	16746150	228.667	N/A	N/A	Target Compound	4301762	1.8	1.87	0.07	M-H	228.667	248.05	248.05	0.2118	True	8.152	1	2054137	Method	N/A	N/A		PPB	Pass	Pass	Pass	N/A	Pass	100	5 of 7	N/A	N/A
84	Processed	190801-084	Unknown		False	B0224p									Confirmed	C10[13]CH11N2[15]NO2S	SCNBimaneIS	2054137	1	1	N/A	Internal Standard	508041	1.8	1.87	0.07	M-H	1	250.05	250.05	0.9083	True	N/A	N/A	N/A	Method	N/A	N/A			Pass	Pass	Pass	N/A	Pass	91.6526	3 of 5	N/A	N/A
85	Processed	190801-085	Unknown		False	B0324p									Confirmed	C11H11N3O2S	SCNBimane	16032098	204.671	N/A	N/A	Target Compound	4118787	1.8	1.88	0.08	M-H	204.671	248.05	248.05	0.2733	True	7.295	1	2197810	Method	N/A	N/A		PPB	Pass	Pass	Pass	N/A	Pass	100	5 of 7	N/A	N/A
85	Processed	190801-085	Unknown		False	B0324p									Confirmed	C10[13]CH11N2[15]NO2S	SCNBimaneIS	2197810	1	1	N/A	Internal Standard	540276	1.8	1.87	0.07	M-H	1	250.05	250.05	0.4811	True	N/A	N/A	N/A	Method	N/A	N/A			Pass	Pass	Pass	N/A	Pass	91.8894	3 of 5	N/A	N/A
86	Processed	190801-086	Unknown		False	C0124p									NotFound		SCNBimane	N/F	N/F	N/A	N/A	Target Compound	N/F	1.8	N/F		N/A	N/F	248.05	N/F	N/F	True	N/F	1	2756780	Method	N/A	N/A		PPB	Fail	N/A	N/A	N/A	N/A	N/A		N/A	N/A
86	Processed	190801-086	Unknown		False	C0124p									Confirmed	C10[13]CH11N2[15]NO2S	SCNBimaneIS	2756780	1	1	N/A	Internal Standard	688039	1.8	1.87	0.07	M-H	1	250.05	250.05	0.4201	True	N/A	N/A	N/A	Method	N/A	N/A			Pass	Pass	Pass	N/A	Pass	99.0404	4 of 5	N/A	N/A
87	Processed	190801-087	Unknown		False	C0224p									NotFound		SCNBimane	N/F	N/F	N/A	N/A	Target Compound	N/F	1.8	N/F		N/A	N/F	248.05	N/F	N/F	True	N/F	1	2503146	Method	N/A	N/A		PPB	Fail	N/A	N/A	N/A	N/A	N/A		N/A	N/A
87	Processed	190801-087	Unknown		False	C0224p									Confirmed	C10[13]CH11N2[15]NO2S	SCNBimaneIS	2503146	1	1	N/A	Internal Standard	608075	1.8	1.87	0.07	M-H	1	250.05	250.05	0.7252	True	N/A	N/A	N/A	Method	N/A	N/A			Pass	Pass	Pass	N/A	Pass	92.0166	3 of 5	N/A	N/A
89	Processed	190801-088_INJ001	Unknown		False	C0324p									Identified	C11H11N3O2S	SCNBimane	34263	0.855	N/A	N/A	Target Compound	15997	1.8	1.81	0.01	M-H	0.855	248.05	248.05	-0.2803	True	0.009	1	3978062	Method	N/A	N/A		PPB	Pass	Pass	Fail	N/A	Fail	100	1 of 1	N/A	N/A
89	Processed	190801-088_INJ001	Unknown		False	C0324p									Confirmed	C10[13]CH11N2[15]NO2S	SCNBimaneIS	3978062	1	1	N/A	Internal Standard	998011	1.8	1.81	0.01	M-H	1	250.05	250.05	-0.1902	True	N/A	N/A	N/A	Method	N/A	N/A			Pass	Pass	Pass	N/A	Pass	98.9272	4 of 5	N/A	N/A
88	Processed	190801-088_restart	Unknown		False	C0324p									Identified	C11H11N3O2S	SCNBimane	7354	0.676	N/A	N/A	Target Compound	4815	1.8	1.8	0.00	M-H	0.676	248.05	248.05	0.3348	True	0.002	1	3308840	Method	N/A	N/A		PPB	Pass	Pass	Fail	N/A	Fail	100	1 of 1	N/A	N/A
88	Processed	190801-088_restart	Unknown		False	C0324p									Confirmed	C10[13]CH11N2[15]NO2S	SCNBimaneIS	3308840	1	1	N/A	Internal Standard	874377	1.8	1.81	0.01	M-H	1	250.05	250.05	-0.0071	True	N/A	N/A	N/A	Method	N/A	N/A			Pass	Pass	Pass	N/A	Pass	96.4802	4 of 5	N/A	N/A
90	Processed	190801-090	Unknown		False	D0224p									Confirmed	C11H11N3O2S	SCNBimane	37595044	396.66	N/A	N/A	Target Compound	10124147	1.8	1.8	0.00	M-H	396.66	248.05	248.05	-0.2803	True	14.158	1	2655438	Method	N/A	N/A		PPB	Pass	Pass	Pass	N/A	Pass	100	7 of 9	N/A	N/A
90	Processed	190801-090	Unknown		False	D0224p									Confirmed	C10[13]CH11N2[15]NO2S	SCNBimaneIS	2655438	1	1	N/A	Internal Standard	697350	1.8	1.8	0.00	M-H	1	250.05	250.05	0.115	True	N/A	N/A	N/A	Method	N/A	N/A			Pass	Pass	Pass	N/A	Pass	92.008	3 of 5	N/A	N/A
91	Processed	190801-091	Unknown		False	D0324p									Confirmed	C11H11N3O2S	SCNBimane	29773972	249.345	N/A	N/A	Target Compound	8107357	1.8	1.8	0.00	M-H	249.345	248.05	248.05	-0.4649	True	8.892	1	3348552	Method	N/A	N/A		PPB	Pass	Pass	Pass	N/A	Pass	100	7 of 9	N/A	N/A
91	Processed	190801-091	Unknown		False	D0324p									Confirmed	C10[13]CH11N2[15]NO2S	SCNBimaneIS	3348552	1	1	N/A	Internal Standard	864756	1.8	1.8	0.00	M-H	1	250.05	250.05	-0.3732	True	N/A	N/A	N/A	Method	N/A	N/A			Pass	Pass	Pass	N/A	Pass	90.8451	3 of 5	N/A	N/A
92	Processed	190801-092	Unknown		False	E0124p									Identified	C11H11N3O2S	SCNBimane	23011	0.769	N/A	N/A	Target Compound	7452	1.8	1.78	-0.02	M-H	0.769	248.05	248.05	-0.957	True	0.006	1	4139905	Method	N/A	N/A		PPB	Pass	Pass	Fail	N/A	Fail	100	1 of 1	N/A	N/A
92	Processed	190801-092	Unknown		False	E0124p									Confirmed	C10[13]CH11N2[15]NO2S	SCNBimaneIS	4139905	1	1	N/A	Internal Standard	1061387	1.8	1.79	-0.01	M-H	1	250.05	250.05	-0.0071	True	N/A	N/A	N/A	Method	N/A	N/A			Pass	Pass	Pass	N/A	Pass	100	5 of 5	N/A	N/A
93	Processed	190801-093	Unknown		False	E0224p									Identified	C11H11N3O2S	SCNBimane	28118	0.807	N/A	N/A	Target Compound	10731	1.8	1.79	-0.01	M-H	0.807	248.05	248.05	-0.4649	True	0.007	1	4065515	Method	N/A	N/A		PPB	Pass	Pass	Fail	N/A	Fail	100	1 of 1	N/A	N/A
93	Processed	190801-093	Unknown		False	E0224p									Confirmed	C10[13]CH11N2[15]NO2S	SCNBimaneIS	4065515	1	1	N/A	Internal Standard	1044306	1.8	1.79	-0.01	M-H	1	250.05	250.05	0.0539	True	N/A	N/A	N/A	Method	N/A	N/A			Pass	Pass	Pass	N/A	Pass	100	5 of 5	N/A	N/A
94	Processed	190801-094	Unknown		False	E0324p									Identified	C11H11N3O2S	SCNBimane	25202	0.785	N/A	N/A	Target Compound	11027	1.8	1.78	-0.02	M-H	0.785	248.05	248.05	-0.834	True	0.006	1	4116291	Method	N/A	N/A		PPB	Pass	Pass	Fail	N/A	Fail	100	1 of 1	N/A	N/A
94	Processed	190801-094	Unknown		False	E0324p									Confirmed	C10[13]CH11N2[15]NO2S	SCNBimaneIS	4116291	1	1	N/A	Internal Standard	1043393	1.8	1.78	-0.02	M-H	1	250.05	250.05	-0.1902	True	N/A	N/A	N/A	Method	N/A	N/A			Pass	Pass	Pass	N/A	Pass	100	5 of 5	N/A	N/A
95	Processed	190801-095	Unknown		False	E24P									Identified	C11H11N3O2S	SCNBimane	22245	0.768	N/A	N/A	Target Compound	10274	1.8	1.79	-0.01	M-H	0.768	248.05	248.05	-0.1573	True	0.006	1	4017286	Method	N/A	N/A		PPB	Pass	Pass	Fail	N/A	Fail	100	1 of 1	N/A	N/A
95	Processed	190801-095	Unknown		False	E24P									Confirmed	C10[13]CH11N2[15]NO2S	SCNBimaneIS	4017286	1	1	N/A	Internal Standard	1018127	1.8	1.79	-0.01	M-H	1	250.05	250.05	-0.1902	True	N/A	N/A	N/A	Method	N/A	N/A			Pass	Pass	Pass	N/A	Pass	100	5 of 5	N/A	N/A
96	Processed	190801-096	Unknown		False	10 ppb STD									Identified	C11H11N3O2S	SCNBimane	2311223	12.346	N/A	N/A	Target Compound	619918	1.8	1.79	-0.01	M-H	12.346	248.05	248.05	-0.0958	True	0.419	1	5510466	Method	N/A	N/A		PPB	Pass	Pass	Fail	N/A	Pass	58.3662	4 of 6	N/A	N/A
96	Processed	190801-096	Unknown		False	10 ppb STD									Confirmed	C10[13]CH11N2[15]NO2S	SCNBimaneIS	5510466	1	1	N/A	Internal Standard	1382301	1.8	1.79	-0.01	M-H	1	250.05	250.05	0.0539	True	N/A	N/A	N/A	Method	N/A	N/A			Pass	Pass	Pass	N/A	Pass	100	5 of 5	N/A	N/A
[truncated: 12 more columns]

## Sheet: Filtered
Acquisition Order	Status	Filename	Sample Type	Level	Excluded	Sample ID	Sample Name	Comments	ColumnHeader1	ColumnHeader2	ColumnHeader3	ColumnHeader4	ColumnHeader5	ColumnHeader6	Confirm	Formula	Compound	Area	Calculated Amt	Theoretical Amt	%Diff	Compound Type	Height	Expected RT	Actual RT	RT Delta	Adduct	Sample Amt	m/z (Expected)	m/z (Apex)	m/z (Delta(ppm))	Active	Response Ratio	ISTD Amt	ISTD Response	Integration Mode	%RSD	%CV	Channel	Final Units	PK	IR	IP	LS	FI	Isotopic Pattern Score (%)	Num Isotopes Matched	Lib Match Name	Library Score (%)
1	Processed	190801-001	Unknown		False	E0204									NotFound		SCNBimane	N/F	N/F	N/A	N/A	Target Compound	N/F	1.8	N/F		N/A	N/F	248.05	N/F	N/F	True	N/F	1	1188346	Method	N/A	N/A		PPB	Fail	N/A	N/A	N/A	N/A	N/A		N/A	N/A
1	Processed	190801-001	Unknown		False	E0204									Confirmed	C10[13]CH11N2[15]NO2S	SCNBimaneIS	1188346	1	1	N/A	Internal Standard	286183	1.8	1.89	0.09	M-H	1	250.05	250.05	0.237	True	N/A	N/A	N/A	Method	N/A	N/A			Pass	Pass	Pass	N/A	Pass	100	3 of 3	N/A	N/A
2	Processed	190801-002	Unknown		False	E0304									Identified	C11H11N3O2S	SCNBimane	8295	0.819	N/A	N/A	Target Compound	3153	1.8	1.87	0.07	M-H	0.819	248.05	248.05	0.8269	True	0.007	1	1128982	Manual	N/A	N/A		PPB	Pass	Pass	Fail	N/A	Fail	100	1 of 1	N/A	N/A
2	Processed	190801-002	Unknown		False	E0304									Confirmed	C10[13]CH11N2[15]NO2S	SCNBimaneIS	1128982	1	1	N/A	Internal Standard	273874	1.8	1.87	0.07	M-H	1	250.05	250.05	0.4811	True	N/A	N/A	N/A	Method	N/A	N/A			Pass	Pass	Pass	N/A	Pass	100	3 of 3	N/A	N/A
3	Processed	190801-003	Unknown		False	A0108									NotFound		SCNBimane	N/F	N/F	N/A	N/A	Target Compound	N/F	1.8	N/F		N/A	N/F	248.05	N/F	N/F	True	N/F	1	1169379	Method	N/A	N/A		PPB	Fail	N/A	N/A	N/A	N/A	N/A		N/A	N/A
3	Processed	190801-003	Unknown		False	A0108									Confirmed	C10[13]CH11N2[15]NO2S	SCNBimaneIS	1169379	1	1	N/A	Internal Standard	304943	1.8	1.86	0.06	M-H	1	250.05	250.05	0.4811	True	N/A	N/A	N/A	Method	N/A	N/A			Pass	Pass	Pass	N/A	Pass	100	3 of 3	N/A	N/A
4	Processed	190801-004	Unknown		False	A0208									Confirmed	C11H11N3O2S	SCNBimane	590781	14.968	N/A	N/A	Target Compound	158121	1.8	1.86	0.06	M-H	14.968	248.05	248.05	0.3963	True	0.513	1	1151289	Method	N/A	N/A		PPB	Pass	Pass	Pass	N/A	Pass	63.5367	2 of 3	N/A	N/A
4	Processed	190801-004	Unknown		False	A0208									Confirmed	C10[13]CH11N2[15]NO2S	SCNBimaneIS	1151289	1	1	N/A	Internal Standard	277842	1.8	1.86	0.06	M-H	1	250.05	250.05	0.4811	True	N/A	N/A	N/A	Method	N/A	N/A			Pass	Pass	Pass	N/A	Pass	100	3 of 3	N/A	N/A
5	Processed	190801-005	Unknown		False	A0308									Identified	C11H11N3O2S	SCNBimane	85661	2.416	N/A	N/A	Target Compound	29189	1.8	1.85	0.05	M-H	2.416	248.05	248.05	0.0272	True	0.064	1	1329332	Method	N/A	N/A		PPB	Pass	Pass	Fail	N/A	Pass	0	1 of 2	N/A	N/A
5	Processed	190801-005	Unknown		False	A0308									Confirmed	C10[13]CH11N2[15]NO2S	SCNBimaneIS	1329332	1	1	N/A	Internal Standard	335639	1.8	1.85	0.05	M-H	1	250.05	250.05	0.4201	True	N/A	N/A	N/A	Method	N/A	N/A			Pass	Pass	Pass	N/A	Pass	98.8765	3 of 4	N/A	N/A
6	Processed	190801-006	Unknown		False	A0408									Confirmed	C11H11N3O2S	SCNBimane	425577	9.767	N/A	N/A	Target Compound	114651	1.8	1.85	0.05	M-H	9.767	248.05	248.05	-0.0343	True	0.327	1	1300673	Method	N/A	N/A		PPB	Pass	Pass	Pass	N/A	Pass	67.0531	2 of 3	N/A	N/A
6	Processed	190801-006	Unknown		False	A0408									Confirmed	C10[13]CH11N2[15]NO2S	SCNBimaneIS	1300673	1	1	N/A	Internal Standard	314685	1.8	1.85	0.05	M-H	1	250.05	250.05	0.4201	True	N/A	N/A	N/A	Method	N/A	N/A			Pass	Pass	Pass	N/A	Pass	98.718	3 of 4	N/A	N/A
7	Processed	190801-007	Unknown		False	A0508									Confirmed	C11H11N3O2S	SCNBimane	802282	14.388	N/A	N/A	Target Compound	215818	1.8	1.86	0.06	M-H	14.388	248.05	248.05	0.2733	True	0.492	1	1629303	Method	N/A	N/A		PPB	Pass	Pass	Pass	N/A	Pass	59.8638	2 of 3	N/A	N/A
7	Processed	190801-007	Unknown		False	A0508									Confirmed	C10[13]CH11N2[15]NO2S	SCNBimaneIS	1629303	1	1	N/A	Internal Standard	393423	1.8	1.86	0.06	M-H	1	250.05	250.05	0.5421	True	N/A	N/A	N/A	Method	N/A	N/A			Pass	Pass	Pass	N/A	Pass	91.9571	3 of 5	N/A	N/A
8	Processed	190801-008	Unknown		False	A0608									Confirmed	C11H11N3O2S	SCNBimane	1248870	22.126	N/A	N/A	Target Compound	311347	1.8	1.86	0.06	M-H	22.126	248.05	248.05	-0.0343	True	0.769	1	1623974	Method	N/A	N/A		PPB	Pass	Pass	Pass	N/A	Pass	61.2733	3 of 5	N/A	N/A
8	Processed	190801-008	Unknown		False	A0608									Confirmed	C10[13]CH11N2[15]NO2S	SCNBimaneIS	1623974	1	1	N/A	Internal Standard	401220	1.8	1.86	0.06	M-H	1	250.05	250.05	0.176	True	N/A	N/A	N/A	Method	N/A	N/A			Pass	Pass	Pass	N/A	Pass	92.1283	3 of 5	N/A	N/A
9	Processed	190801-009	Unknown		False	A0708									Identified	C11H11N3O2S	SCNBimane	888057	14.537	N/A	N/A	Target Compound	231111	1.8	1.85	0.05	M-H	14.537	248.05	248.05	0.4578	True	0.498	1	1784277	Method	N/A	N/A		PPB	Pass	Pass	Fail	N/A	Pass	58.5999	2 of 4	N/A	N/A
9	Processed	190801-009	Unknown		False	A0708									Confirmed	C10[13]CH11N2[15]NO2S	SCNBimaneIS	1784277	1	1	N/A	Internal Standard	429581	1.8	1.85	0.05	M-H	1	250.05	250.05	0.5421	True	N/A	N/A	N/A	Method	N/A	N/A			Pass	Pass	Pass	N/A	Pass	92.221	3 of 5	N/A	N/A
10	Processed	190801-010	Unknown		False	A0808									Confirmed	C11H11N3O2S	SCNBimane	960046	16.568	N/A	N/A	Target Compound	239553	1.8	1.86	0.06	M-H	16.568	248.05	248.05	0.1503	True	0.57	1	1683306	Method	N/A	N/A		PPB	Pass	Pass	Pass	N/A	Pass	59.5876	2 of 4	N/A	N/A
10	Processed	190801-010	Unknown		False	A0808									Confirmed	C10[13]CH11N2[15]NO2S	SCNBimaneIS	1683306	1	1	N/A	Internal Standard	405593	1.8	1.86	0.06	M-H	1	250.05	250.05	0.359	True	N/A	N/A	N/A	Method	N/A	N/A			Pass	Pass	Pass	N/A	Pass	91.8795	3 of 5	N/A	N/A
11	Processed	190801-011	Unknown		False	A0908									Confirmed	C11H11N3O2S	SCNBimane	2622930	42.188	N/A	N/A	Target Compound	659748	1.8	1.86	0.06	M-H	42.188	248.05	248.05	0.1503	True	1.486	1	1764851	Method	N/A	N/A		PPB	Pass	Pass	Pass	N/A	Pass	71.2631	3 of 5	N/A	N/A
11	Processed	190801-011	Unknown		False	A0908									Confirmed	C10[13]CH11N2[15]NO2S	SCNBimaneIS	1764851	1	1	N/A	Internal Standard	431791	1.8	1.86	0.06	M-H	1	250.05	250.05	0.4201	True	N/A	N/A	N/A	Method	N/A	N/A			Pass	Pass	Pass	N/A	Pass	92.2048	3 of 5	N/A	N/A
12	Processed	190801-012	Unknown		False	A1008									Confirmed	C11H11N3O2S	SCNBimane	2029039	35.649	N/A	N/A	Target Compound	510243	1.8	1.86	0.06	M-H	35.649	248.05	248.05	0.3348	True	1.252	1	1620084	Method	N/A	N/A		PPB	Pass	Pass	Pass	N/A	Pass	66.6521	3 of 6	N/A	N/A
12	Processed	190801-012	Unknown		False	A1008									Confirmed	C10[13]CH11N2[15]NO2S	SCNBimaneIS	1620084	1	1	N/A	Internal Standard	383963	1.8	1.87	0.07	M-H	1	250.05	250.05	0.5421	True	N/A	N/A	N/A	Method	N/A	N/A			Pass	Pass	Pass	N/A	Pass	92.0645	3 of 5	N/A	N/A
13	Processed	190801-013	Unknown		False	B0108									Confirmed	C11H11N3O2S	SCNBimane	14818875	235.471	N/A	N/A	Target Compound	3743693	1.8	1.86	0.06	M-H	235.471	248.05	248.05	-0.1573	True	8.396	1	1765068	Method	N/A	N/A		PPB	Pass	Pass	Pass	N/A	Pass	100	7 of 8	N/A	N/A
13	Processed	190801-013	Unknown		False	B0108									Confirmed	C10[13]CH11N2[15]NO2S	SCNBimaneIS	1765068	1	1	N/A	Internal Standard	426405	1.8	1.86	0.06	M-H	1	250.05	250.05	0.176	True	N/A	N/A	N/A	Method	N/A	N/A			Pass	Pass	Pass	N/A	Pass	92.1626	3 of 5	N/A	N/A
14	Processed	190801-014	Unknown		False	B0208									Confirmed	C11H11N3O2S	SCNBimane	15137313	252.366	N/A	N/A	Target Compound	3788378	1.8	1.86	0.06	M-H	252.366	248.05	248.05	0.3348	True	9	1	1681999	Method	N/A	N/A		PPB	Pass	Pass	Pass	N/A	Pass	100	6 of 7	N/A	N/A
14	Processed	190801-014	Unknown		False	B0208									Confirmed	C10[13]CH11N2[15]NO2S	SCNBimaneIS	1681999	1	1	N/A	Internal Standard	404565	1.8	1.86	0.06	M-H	1	250.05	250.05	0.4201	True	N/A	N/A	N/A	Method	N/A	N/A			Pass	Pass	Pass	N/A	Pass	91.5813	3 of 5	N/A	N/A
15	Processed	190801-015	Unknown		False	B0308									Confirmed	C11H11N3O2S	SCNBimane	17378112	285.735	N/A	N/A	Target Compound	4371069	1.8	1.86	0.06	M-H	285.735	248.05	248.05	0.1503	True	10.192	1	1704996	Method	N/A	N/A		PPB	Pass	Pass	Pass	N/A	Pass	100	6 of 7	N/A	N/A
15	Processed	190801-015	Unknown		False	B0308									Confirmed	C10[13]CH11N2[15]NO2S	SCNBimaneIS	1704996	1	1	N/A	Internal Standard	405052	1.8	1.86	0.06	M-H	1	250.05	250.05	0.5421	True	N/A	N/A	N/A	Method	N/A	N/A			Pass	Pass	Pass	N/A	Pass	91.8601	3 of 5	N/A	N/A
16	Processed	190801-016	Unknown		False	C0108									NotFound		SCNBimane	N/F	N/F	N/A	N/A	Target Compound	N/F	1.8	N/F		N/A	N/F	248.05	N/F	N/F	True	N/F	1	1893368	Method	N/A	N/A		PPB	Fail	N/A	N/A	N/A	N/A	N/A		N/A	N/A
16	Processed	190801-016	Unknown		False	C0108									Confirmed	C10[13]CH11N2[15]NO2S	SCNBimaneIS	1893368	1	1	N/A	Internal Standard	444138	1.8	1.86	0.06	M-H	1	250.05	250.05	0.4811	True	N/A	N/A	N/A	Method	N/A	N/A			Pass	Pass	Pass	N/A	Pass	92.2644	3 of 5	N/A	N/A
17	Processed	190801-017	Unknown		False	C0208									NotFound		SCNBimane	N/F	N/F	N/A	N/A	Target Compound	N/F	1.8	N/F		N/A	N/F	248.05	N/F	N/F	True	N/F	1	2056872	Method	N/A	N/A		PPB	Fail	N/A	N/A	N/A	N/A	N/A		N/A	N/A
17	Processed	190801-017	Unknown		False	C0208									Confirmed	C10[13]CH11N2[15]NO2S	SCNBimaneIS	2056872	1	1	N/A	Internal Standard	488378	1.8	1.86	0.06	M-H	1	250.05	250.05	0.115	True	N/A	N/A	N/A	Method	N/A	N/A			Pass	Pass	Pass	N/A	Pass	100	5 of 5	N/A	N/A
18	Processed	190801-018	Unknown		False	C0308									NotFound		SCNBimane	N/F	N/F	N/A	N/A	Target Compound	N/F	1.8	N/F		N/A	N/F	248.05	N/F	N/F	True	N/F	1	1982251	Method	N/A	N/A		PPB	Fail	N/A	N/A	N/A	N/A	N/A		N/A	N/A
18	Processed	190801-018	Unknown		False	C0308									Confirmed	C10[13]CH11N2[15]NO2S	SCNBimaneIS	1982251	1	1	N/A	Internal Standard	476904	1.8	1.87	0.07	M-H	1	250.05	250.05	0.4811	True	N/A	N/A	N/A	Method	N/A	N/A			Pass	Pass	Pass	N/A	Pass	92.2566	3 of 5	N/A	N/A
19	Processed	190801-019	Unknown		False	D0108									Confirmed	C11H11N3O2S	SCNBimane	19559967	322.098	N/A	N/A	Target Compound	4932647	1.8	1.87	0.07	M-H	322.098	248.05	248.05	0.2733	True	11.492	1	1702001	Method	N/A	N/A		PPB	Pass	Pass	Pass	N/A	Pass	100	6 of 8	N/A	N/A
19	Processed	190801-019	Unknown		False	D0108									Confirmed	C10[13]CH11N2[15]NO2S	SCNBimaneIS	1702001	1	1	N/A	Internal Standard	412730	1.8	1.87	0.07	M-H	1	250.05	250.05	0.237	True	N/A	N/A	N/A	Method	N/A	N/A			Pass	Pass	Pass	N/A	Pass	90.2242	3 of 5	N/A	N/A
20	Processed	190801-020	Unknown		False	D0208									Confirmed	C11H11N3O2S	SCNBimane	18920236	323.014	N/A	N/A	Target Compound	4699925	1.8	1.87	0.07	M-H	323.014	248.05	248.05	0.3963	True	11.525	1	1641657	Method	N/A	N/A		PPB	Pass	Pass	Pass	N/A	Pass	100	6 of 8	N/A	N/A
20	Processed	190801-020	Unknown		False	D0208									Confirmed	C10[13]CH11N2[15]NO2S	SCNBimaneIS	1641657	1	1	N/A	Internal Standard	400846	1.8	1.87	0.07	M-H	1	250.05	250.05	0.7862	True	N/A	N/A	N/A	Method	N/A	N/A			Pass	Pass	Pass	N/A	Pass	91.597	3 of 5	N/A	N/A
21	Processed	190801-021	Unknown		False	D0308									Confirmed	C11H11N3O2S	SCNBimane	18688993	311.121	N/A	N/A	Target Compound	4684531	1.8	1.87	0.07	M-H	311.121	248.05	248.05	0.0888	True	11.1	1	1683701	Method	N/A	N/A		PPB	Pass	Pass	Pass	N/A	Pass	100	6 of 9	N/A	N/A
21	Processed	190801-021	Unknown		False	D0308									Identified	C10[13]CH11N2[15]NO2S	SCNBimaneIS	1683701	1	1	N/A	Internal Standard	416177	1.8	1.87	0.07	M-H	1	250.05	250.05	0.359	True	N/A	N/A	N/A	Method	N/A	N/A			Pass	Pass	Pass	N/A	Fail	96.6372	3 of 5	N/A	N/A
22	Processed	190801-022	Unknown		False	E0108									NotFound		SCNBimane	N/F	N/F	N/A	N/A	Target Compound	N/F	1.8	N/F		N/A	N/F	248.05	N/F	N/F	True	N/F	1	2001298	Method	N/A	N/A		PPB	Fail	N/A	N/A	N/A	N/A	N/A		N/A	N/A
22	Processed	190801-022	Unknown		False	E0108									Confirmed	C10[13]CH11N2[15]NO2S	SCNBimaneIS	2001298	1	1	N/A	Internal Standard	481437	1.8	1.87	0.07	M-H	1	250.05	250.05	0.4201	True	N/A	N/A	N/A	Method	N/A	N/A			Pass	Pass	Pass	N/A	Pass	98.7429	4 of 5	N/A	N/A
23	Processed	190801-023	Unknown		False	E0208									Identified	C11H11N3O2S	SCNBimane	10566	0.77	N/A	N/A	Target Compound	2958	1.8	1.88	0.08	M-H	0.77	248.05	248.05	0.1503	True	0.006	1	1889180	Method	N/A	N/A		PPB	Pass	Pass	Fail	N/A	Fail	100	1 of 1	N/A	N/A
23	Processed	190801-023	Unknown		False	E0208									Confirmed	C10[13]CH11N2[15]NO2S	SCNBimaneIS	1889180	1	1	N/A	Internal Standard	468662	1.8	1.87	0.07	M-H	1	250.05	250.05	0.4811	True	N/A	N/A	N/A	Method	N/A	N/A			Pass	Pass	Pass	N/A	Pass	96.1683	4 of 5	N/A	N/A
24	Processed	190801-024	Unknown		False	E0308									NotFound		SCNBimane	N/F	N/F	N/A	N/A	Target Compound	N/F	1.8	N/F		N/A	N/F	248.05	N/F	N/F	True	N/F	1	1818158	Method	N/A	N/A		PPB	Fail	N/A	N/A	N/A	N/A	N/A		N/A	N/A
24	Processed	190801-024	Unknown		False	E0308									Confirmed	C10[13]CH11N2[15]NO2S	SCNBimaneIS	1818158	1	1	N/A	Internal Standard	442759	1.8	1.87	0.07	M-H	1	250.05	250.051	1.0913	True	N/A	N/A	N/A	Method	N/A	N/A			Pass	Pass	Pass	N/A	Pass	92.0628	3 of 5	N/A	N/A
25	Processed	190801-025	Unknown		False	A0116									NotFound		SCNBimane	N/F	N/F	N/A	N/A	Target Compound	N/F	1.8	N/F		N/A	N/F	248.05	N/F	N/F	True	N/F	1	1762907	Method	N/A	N/A		PPB	Fail	N/A	N/A	N/A	N/A	N/A		N/A	N/A
25	Processed	190801-025	Unknown		False	A0116									Confirmed	C10[13]CH11N2[15]NO2S	SCNBimaneIS	1762907	1	1	N/A	Internal Standard	428540	1.8	1.87	0.07	M-H	1	250.05	250.05	0.6642	True	N/A	N/A	N/A	Method	N/A	N/A			Pass	Pass	Pass	N/A	Pass	91.9811	3 of 5	N/A	N/A
26	Processed	190801-026	Unknown		False	5 ppbSTD									Identified	C11H11N3O2S	SCNBimane	582780	7.415	N/A	N/A	Target Compound	150972	1.8	1.87	0.07	M-H	7.415	248.05	248.05	1.0115	True	0.243	1	2396910	Method	N/A	N/A		PPB	Pass	Pass	Fail	N/A	Pass	48.104	3 of 5	N/A	N/A
26	Processed	190801-026	Unknown		False	5 ppbSTD									Confirmed	C10[13]CH11N2[15]NO2S	SCNBimaneIS	2396910	1	1	N/A	Internal Standard	570093	1.8	1.87	0.07	M-H	1	250.05	250.051	1.1523	True	N/A	N/A	N/A	Method	N/A	N/A			Pass	Pass	Pass	N/A	Pass	95.9724	4 of 5	N/A	N/A
27	Processed	190801-027	Unknown		False	A0216									NotFound		SCNBimane	N/F	N/F	N/A	N/A	Target Compound	N/F	1.8	N/F		N/A	N/F	248.05	N/F	N/F	True	N/F	1	1881444	Method	N/A	N/A		PPB	Fail	N/A	N/A	N/A	N/A	N/A		N/A	N/A
27	Processed	190801-027	Unknown		False	A0216									Confirmed	C10[13]CH11N2[15]NO2S	SCNBimaneIS	1881444	1	1	N/A	Internal Standard	458457	1.8	1.87	0.07	M-H	1	250.05	250.05	0.7252	True	N/A	N/A	N/A	Method	N/A	N/A			Pass	Pass	Pass	N/A	Pass	92.0004	3 of 5	N/A	N/A
28	Processed	190801-028	Unknown		False	A0316									NotFound		SCNBimane	N/F	N/F	N/A	N/A	Target Compound	N/F	1.8	N/F		N/A	N/F	248.05	N/F	N/F	True	N/F	1	1765100	Method	N/A	N/A		PPB	Fail	N/A	N/A	N/A	N/A	N/A		N/A	N/A
28	Processed	190801-028	Unknown		False	A0316									Confirmed	C10[13]CH11N2[15]NO2S	SCNBimaneIS	1765100	1	1	N/A	Internal Standard	417189	1.8	1.87	0.07	M-H	1	250.05	250.051	1.0913	True	N/A	N/A	N/A	Method	N/A	N/A			Pass	Pass	Pass	N/A	Pass	91.7701	3 of 5	N/A	N/A
29	Processed	190801-029	Unknown		False	A0416									NotFound		SCNBimane	N/F	N/F	N/A	N/A	Target Compound	N/F	1.8	N/F		N/A	N/F	248.05	N/F	N/F	True	N/F	1	1935927	Method	N/A	N/A		PPB	Fail	N/A	N/A	N/A	N/A	N/A		N/A	N/A
29	Processed	190801-029	Unknown		False	A0416									Confirmed	C10[13]CH11N2[15]NO2S	SCNBimaneIS	1935927	1	1	N/A	Internal Standard	464582	1.8	1.87	0.07	M-H	1	250.05	250.051	0.9693	True	N/A	N/A	N/A	Method	N/A	N/A			Pass	Pass	Pass	N/A	Pass	91.8988	3 of 5	N/A	N/A
30	Processed	190801-030	Unknown		False	A0516									NotFound		SCNBimane	N/F	N/F	N/A	N/A	Target Compound	N/F	1.8	N/F		N/A	N/F	248.05	N/F	N/F	True	N/F	1	1962922	Method	N/A	N/A		PPB	Fail	N/A	N/A	N/A	N/A	N/A		N/A	N/A
30	Processed	190801-030	Unknown		False	A0516									Confirmed	C10[13]CH11N2[15]NO2S	SCNBimaneIS	1962922	1	1	N/A	Internal Standard	475946	1.8	1.87	0.07	M-H	1	250.05	250.05	0.8472	True	N/A	N/A	N/A	Method	N/A	N/A			Pass	Pass	Pass	N/A	Pass	96.123	4 of 5	N/A	N/A
31	Processed	190801-031	Unknown		False	A0616									NotFound		SCNBimane	N/F	N/F	N/A	N/A	Target Compound	N/F	1.8	N/F		N/A	N/F	248.05	N/F	N/F	True	N/F	1	2118107	Method	N/A	N/A		PPB	Fail	N/A	N/A	N/A	N/A	N/A		N/A	N/A
31	Processed	190801-031	Unknown		False	A0616									Confirmed	C10[13]CH11N2[15]NO2S	SCNBimaneIS	2118107	1	1	N/A	Internal Standard	515669	1.8	1.87	0.07	M-H	1	250.05	250.05	0.6642	True	N/A	N/A	N/A	Method	N/A	N/A			Pass	Pass	Pass	N/A	Pass	96.2081	4 of 5	N/A	N/A
32	Processed	190801-032	Unknown		False	A0716									NotFound		SCNBimane	N/F	N/F	N/A	N/A	Target Compound	N/F	1.8	N/F		N/A	N/F	248.05	N/F	N/F	True	N/F	1	2198204	Method	N/A	N/A		PPB	Fail	N/A	N/A	N/A	N/A	N/A		N/A	N/A
32	Processed	190801-032	Unknown		False	A0716									Confirmed	C10[13]CH11N2[15]NO2S	SCNBimaneIS	2198204	1	1	N/A	Internal Standard	529754	1.8	1.87	0.07	M-H	1	250.05	250.05	0.5421	True	N/A	N/A	N/A	Method	N/A	N/A			Pass	Pass	Pass	N/A	Pass	98.8041	4 of 5	N/A	N/A
33	Processed	190801-033	Unknown		False	A0816									NotFound		SCNBimane	N/F	N/F	N/A	N/A	Target Compound	N/F	1.8	N/F		N/A	N/F	248.05	N/F	N/F	True	N/F	1	2103341	Method	N/A	N/A		PPB	Fail	N/A	N/A	N/A	N/A	N/A		N/A	N/A
33	Processed	190801-033	Unknown		False	A0816									Confirmed	C10[13]CH11N2[15]NO2S	SCNBimaneIS	2103341	1	1	N/A	Internal Standard	520846	1.8	1.87	0.07	M-H	1	250.05	250.05	0.7252	True	N/A	N/A	N/A	Method	N/A	N/A			Pass	Pass	Pass	N/A	Pass	92.1012	3 of 5	N/A	N/A
34	Processed	190801-034	Unknown		False	A0916									Confirmed	C11H11N3O2S	SCNBimane	592345	8.693	N/A	N/A	Target Compound	158596	1.8	1.87	0.07	M-H	8.693	248.05	248.05	0.5809	True	0.289	1	2051031	Method	N/A	N/A		PPB	Pass	Pass	Pass	N/A	Pass	74.4493	2 of 4	N/A	N/A
34	Processed	190801-034	Unknown		False	A0916									Confirmed	C10[13]CH11N2[15]NO2S	SCNBimaneIS	2051031	1	1	N/A	Internal Standard	484103	1.8	1.87	0.07	M-H	1	250.05	250.05	0.6642	True	N/A	N/A	N/A	Method	N/A	N/A			Pass	Pass	Pass	N/A	Pass	98.6136	4 of 5	N/A	N/A
35	Processed	190801-035	Unknown		False	A1016									Confirmed	C11H11N3O2S	SCNBimane	1059208	16.321	N/A	N/A	Target Compound	277371	1.8	1.87	0.07	M-H	16.321	248.05	248.05	0.7654	True	0.562	1	1886370	Method	N/A	N/A		PPB	Pass	Pass	Pass	N/A	Pass	75.5508	3 of 4	N/A	N/A
35	Processed	190801-035	Unknown		False	A1016									Confirmed	C10[13]CH11N2[15]NO2S	SCNBimaneIS	1886370	1	1	N/A	Internal Standard	457315	1.8	1.87	0.07	M-H	1	250.05	250.05	0.8472	True	N/A	N/A	N/A	Method	N/A	N/A			Pass	Pass	Pass	N/A	Pass	91.9049	3 of 5	N/A	N/A
36	Processed	190801-036	Unknown		False	B0116									Confirmed	C11H11N3O2S	SCNBimane	16173448	284.165	N/A	N/A	Target Compound	4174379	1.8	1.86	0.06	M-H	284.165	248.05	248.05	0.3963	True	10.136	1	1595596	Method	N/A	N/A		PPB	Pass	Pass	Pass	N/A	Pass	100	7 of 8	N/A	N/A
36	Processed	190801-036	Unknown		False	B0116									Confirmed	C10[13]CH11N2[15]NO2S	SCNBimaneIS	1595596	1	1	N/A	Internal Standard	397074	1.8	1.86	0.06	M-H	1	250.05	250.05	0.7252	True	N/A	N/A	N/A	Method	N/A	N/A			Pass	Pass	Pass	N/A	Pass	90.556	3 of 5	N/A	N/A
37	Processed	190801-037	Unknown		False	B0216									Confirmed	C11H11N3O2S	SCNBimane	13719472	195.363	N/A	N/A	Target Compound	3552820	1.8	1.86	0.06	M-H	195.363	248.05	248.05	0.3348	True	6.962	1	1970660	Method	N/A	N/A		PPB	Pass	Pass	Pass	N/A	Pass	100	7 of 8	N/A	N/A
37	Processed	190801-037	Unknown		False	B0216									Confirmed	C10[13]CH11N2[15]NO2S	SCNBimaneIS	1970660	1	1	N/A	Internal Standard	481213	1.8	1.86	0.06	M-H	1	250.05	250.05	0.7862	True	N/A	N/A	N/A	Method	N/A	N/A			Pass	Pass	Pass	N/A	Pass	90.9751	3 of 5	N/A	N/A
38	Processed	190801-038	Unknown		False	B0316									Confirmed	C11H11N3O2S	SCNBimane	16689188	230.584	N/A	N/A	Target Compound	4226947	1.8	1.86	0.06	M-H	230.584	248.05	248.05	0.3348	True	8.221	1	2030083	Method	N/A	N/A		PPB	Pass	Pass	Pass	N/A	Pass	100	6 of 7	N/A	N/A
38	Processed	190801-038	Unknown		False	B0316									Confirmed	C10[13]CH11N2[15]NO2S	SCNBimaneIS	2030083	1	1	N/A	Internal Standard	492994	1.8	1.86	0.06	M-H	1	250.05	250.05	0.4811	True	N/A	N/A	N/A	Method	N/A	N/A			Pass	Pass	Pass	N/A	Pass	96.0872	4 of 5	N/A	N/A
39	Processed	190801-039	Unknown		False	C0116									NotFound		SCNBimane	N/F	N/F	N/A	N/A	Target Compound	N/F	1.8	N/F		N/A	N/F	248.05	N/F	N/F	True	N/F	1	2195096	Method	N/A	N/A		PPB	Fail	N/A	N/A	N/A	N/A	N/A		N/A	N/A
39	Processed	190801-039	Unknown		False	C0116									Confirmed	C10[13]CH11N2[15]NO2S	SCNBimaneIS	2195096	1	1	N/A	Internal Standard	542996	1.8	1.87	0.07	M-H	1	250.05	250.05	0.6031	True	N/A	N/A	N/A	Method	N/A	N/A			Pass	Pass	Pass	N/A	Pass	92.0896	3 of 5	N/A	N/A
40	Processed	190801-040	Unknown		False	C0216									NotFound		SCNBimane	N/F	N/F	N/A	N/A	Target Compound	N/F	1.8	N/F		N/A	N/F	248.05	N/F	N/F	True	N/F	1	2163373	Method	N/A	N/A		PPB	Fail	N/A	N/A	N/A	N/A	N/A		N/A	N/A
40	Processed	190801-040	Unknown		False	C0216									Confirmed	C10[13]CH11N2[15]NO2S	SCNBimaneIS	2163373	1	1	N/A	Internal Standard	528639	1.8	1.87	0.07	M-H	1	250.05	250.051	1.0913	True	N/A	N/A	N/A	Method	N/A	N/A			Pass	Pass	Pass	N/A	Pass	92.041	3 of 5	N/A	N/A
41	Processed	190801-041	Unknown		False	C0316									NotFound		SCNBimane	N/F	N/F	N/A	N/A	Target Compound	N/F	1.8	N/F		N/A	N/F	248.05	N/F	N/F	True	N/F	1	2282800	Method	N/A	N/A		PPB	Fail	N/A	N/A	N/A	N/A	N/A		N/A	N/A
41	Processed	190801-041	Unknown		False	C0316									Confirmed	C10[13]CH11N2[15]NO2S	SCNBimaneIS	2282800	1	1	N/A	Internal Standard	557434	1.8	1.87	0.07	M-H	1	250.05	250.05	0.7862	True	N/A	N/A	N/A	Method	N/A	N/A			Pass	Pass	Pass	N/A	Pass	92.113	3 of 5	N/A	N/A
42	Processed	190801-042	Unknown		False	D0116									Confirmed	C11H11N3O2S	SCNBimane	19922540	266.963	N/A	N/A	Target Compound	5209580	1.8	1.87	0.07	M-H	266.963	248.05	248.05	0.7654	True	9.521	1	2092400	Method	N/A	N/A		PPB	Pass	Pass	Pass	N/A	Pass	100	6 of 9	N/A	N/A
42	Processed	190801-042	Unknown		False	D0116									Confirmed	C10[13]CH11N2[15]NO2S	SCNBimaneIS	2092400	1	1	N/A	Internal Standard	524447	1.8	1.87	0.07	M-H	1	250.05	250.051	1.0913	True	N/A	N/A	N/A	Method	N/A	N/A			Pass	Pass	Pass	N/A	Pass	91.3412	3 of 5	N/A	N/A
43	Processed	190801-043	Unknown		False	D0216									Confirmed	C11H11N3O2S	SCNBimane	18122148	231.729	N/A	N/A	Target Compound	4735090	1.8	1.87	0.07	M-H	231.729	248.05	248.05	0.5809	True	8.262	1	2193474	Method	N/A	N/A		PPB	Pass	Pass	Pass	N/A	Pass	100	6 of 8	N/A	N/A
43	Processed	190801-043	Unknown		False	D0216									Confirmed	C10[13]CH11N2[15]NO2S	SCNBimaneIS	2193474	1	1	N/A	Internal Standard	547210	1.8	1.87	0.07	M-H	1	250.05	250.051	1.0913	True	N/A	N/A	N/A	Method	N/A	N/A			Pass	Pass	Pass	N/A	Pass	91.0966	3 of 5	N/A	N/A
44	Processed	190801-044	Unknown		False	D0316									Confirmed	C11H11N3O2S	SCNBimane	21164818	296.505	N/A	N/A	Target Compound	5417868	1.8	1.87	0.07	M-H	296.505	248.05	248.05	0.7039	True	10.577	1	2000935	Method	N/A	N/A		PPB	Pass	Pass	Pass	N/A	Pass	100	6 of 8	N/A	N/A
44	Processed	190801-044	Unknown		False	D0316									Confirmed	C10[13]CH11N2[15]NO2S	SCNBimaneIS	2000935	1	1	N/A	Internal Standard	486579	1.8	1.87	0.07	M-H	1	250.05	250.051	1.0913	True	N/A	N/A	N/A	Method	N/A	N/A			Pass	Pass	Pass	N/A	Pass	91.4765	3 of 5	N/A	N/A
45	Processed	190801-045	Unknown		False	E0116									NotFound		SCNBimane	N/F	N/F	N/A	N/A	Target Compound	N/F	1.8	N/F		N/A	N/F	248.05	N/F	N/F	True	N/F	1	2302065	Method	N/A	N/A		PPB	Fail	N/A	N/A	N/A	N/A	N/A		N/A	N/A
45	Processed	190801-045	Unknown		False	E0116									Confirmed	C10[13]CH11N2[15]NO2S	SCNBimaneIS	2302065	1	1	N/A	Internal Standard	567119	1.8	1.87	0.07	M-H	1	250.05	250.05	0.7252	True	N/A	N/A	N/A	Method	N/A	N/A			Pass	Pass	Pass	N/A	Pass	96.2578	4 of 5	N/A	N/A
46	Processed	190801-046	Unknown		False	E0216									NotFound		SCNBimane	N/F	N/F	N/A	N/A	Target Compound	N/F	1.8	N/F		N/A	N/F	248.05	N/F	N/F	True	N/F	1	2256872	Method	N/A	N/A		PPB	Fail	N/A	N/A	N/A	N/A	N/A		N/A	N/A
46	Processed	190801-046	Unknown		False	E0216									Confirmed	C10[13]CH11N2[15]NO2S	SCNBimaneIS	2256872	1	1	N/A	Internal Standard	548446	1.8	1.88	0.08	M-H	1	250.05	250.05	0.8472	True	N/A	N/A	N/A	Method	N/A	N/A			Pass	Pass	Pass	N/A	Pass	96.1957	4 of 5	N/A	N/A
47	Processed	190801-047	Unknown		False	E0316									NotFound		SCNBimane	N/F	N/F	N/A	N/A	Target Compound	N/F	1.8	N/F		N/A	N/F	248.05	N/F	N/F	True	N/F	1	2129306	Method	N/A	N/A		PPB	Fail	N/A	N/A	N/A	N/A	N/A		N/A	N/A
47	Processed	190801-047	Unknown		False	E0316									Confirmed	C10[13]CH11N2[15]NO2S	SCNBimaneIS	2129306	1	1	N/A	Internal Standard	528892	1.8	1.87	0.07	M-H	1	250.05	250.05	0.7862	True	N/A	N/A	N/A	Method	N/A	N/A			Pass	Pass	Pass	N/A	Pass	91.983	3 of 5	N/A	N/A
48	Processed	190801-048	Unknown		False	Blank									NotFound		SCNBimane	N/F	N/F	N/A	N/A	Target Compound	N/F	1.8	N/F		N/A	N/F	248.05	N/F	N/F	True	N/F	1	2965441	Method	N/A	N/A		PPB	Fail	N/A	N/A	N/A	N/A	N/A		N/A	N/A
48	Processed	190801-048	Unknown		False	Blank									Confirmed	C10[13]CH11N2[15]NO2S	SCNBimaneIS	2965441	1	1	N/A	Internal Standard	700309	1.8	1.87	0.07	M-H	1	250.05	250.05	0.6642	True	N/A	N/A	N/A	Method	N/A	N/A			Pass	Pass	Pass	N/A	Pass	100	5 of 5	N/A	N/A
49	Processed	190801-049	Unknown		False	A0124									NotFound		SCNBimane	N/F	N/F	N/A	N/A	Target Compound	N/F	1.8	N/F		N/A	N/F	248.05	N/F	N/F	True	N/F	1	2598620	Method	N/A	N/A		PPB	Fail	N/A	N/A	N/A	N/A	N/A		N/A	N/A
49	Processed	190801-049	Unknown		False	A0124									Confirmed	C10[13]CH11N2[15]NO2S	SCNBimaneIS	2598620	1	1	N/A	Internal Standard	632902	1.8	1.87	0.07	M-H	1	250.05	250.05	0.9083	True	N/A	N/A	N/A	Method	N/A	N/A			Pass	Pass	Pass	N/A	Pass	95.8181	4 of 5	N/A	N/A
50	Processed	190801-050	Unknown		False	A0224									NotFound		SCNBimane	N/F	N/F	N/A	N/A	Target Compound	N/F	1.8	N/F		N/A	N/F	248.05	N/F	N/F	True	N/F	1	2446739	Method	N/A	N/A		PPB	Fail	N/A	N/A	N/A	N/A	N/A		N/A	N/A
50	Processed	190801-050	Unknown		False	A0224									Confirmed	C10[13]CH11N2[15]NO2S	SCNBimaneIS	2446739	1	1	N/A	Internal Standard	614540	1.8	1.87	0.07	M-H	1	250.05	250.05	0.4811	True	N/A	N/A	N/A	Method	N/A	N/A			Pass	Pass	Pass	N/A	Pass	100	5 of 5	N/A	N/A
51	Processed	190801-051	Unknown		False	A0324									NotFound		SCNBimane	N/F	N/F	N/A	N/A	Target Compound	N/F	1.8	N/F		N/A	N/F	248.05	N/F	N/F	True	N/F	1	2404114	Method	N/A	N/A		PPB	Fail	N/A	N/A	N/A	N/A	N/A		N/A	N/A
51	Processed	190801-051	Unknown		False	A0324									Confirmed	C10[13]CH11N2[15]NO2S	SCNBimaneIS	2404114	1	1	N/A	Internal Standard	594893	1.8	1.87	0.07	M-H	1	250.05	250.05	0.6642	True	N/A	N/A	N/A	Method	N/A	N/A			Pass	Pass	Pass	N/A	Pass	92.1225	3 of 5	N/A	N/A
52	Processed	190801-052	Unknown		False	A0424									NotFound		SCNBimane	N/F	N/F	N/A	N/A	Target Compound	N/F	1.8	N/F		N/A	N/F	248.05	N/F	N/F	True	N/F	1	2466808	Method	N/A	N/A		PPB	Fail	N/A	N/A	N/A	N/A	N/A		N/A	N/A
52	Processed	190801-052	Unknown		False	A0424									Confirmed	C10[13]CH11N2[15]NO2S	SCNBimaneIS	2466808	1	1	N/A	Internal Standard	589229	1.8	1.87	0.07	M-H	1	250.05	250.05	0.7862	True	N/A	N/A	N/A	Method	N/A	N/A			Pass	Pass	Pass	N/A	Pass	100	5 of 5	N/A	N/A
53	Processed	190801-053	Unknown		False	A0524									NotFound		SCNBimane	N/F	N/F	N/A	N/A	Target Compound	N/F	1.8	N/F		N/A	N/F	248.05	N/F	N/F	True	N/F	1	2728548	Method	N/A	N/A		PPB	Fail	N/A	N/A	N/A	N/A	N/A		N/A	N/A
53	Processed	190801-053	Unknown		False	A0524									Confirmed	C10[13]CH11N2[15]NO2S	SCNBimaneIS	2728548	1	1	N/A	Internal Standard	667441	1.8	1.88	0.08	M-H	1	250.05	250.05	0.6642	True	N/A	N/A	N/A	Method	N/A	N/A			Pass	Pass	Pass	N/A	Pass	98.5996	4 of 5	N/A	N/A
54	Processed	190801-054	Unknown		False	A0624									NotFound		SCNBimane	N/F	N/F	N/A	N/A	Target Compound	N/F	1.8	N/F		N/A	N/F	248.05	N/F	N/F	True	N/F	1	2291502	Method	N/A	N/A		PPB	Fail	N/A	N/A	N/A	N/A	N/A		N/A	N/A
54	Processed	190801-054	Unknown		False	A0624									Confirmed	C10[13]CH11N2[15]NO2S	SCNBimaneIS	2291502	1	1	N/A	Internal Standard	556147	1.8	1.88	0.08	M-H	1	250.05	250.051	1.0913	True	N/A	N/A	N/A	Method	N/A	N/A			Pass	Pass	Pass	N/A	Pass	91.8612	3 of 5	N/A	N/A
55	Processed	190801-055	Unknown		False	A0724									NotFound		SCNBimane	N/F	N/F	N/A	N/A	Target Compound	N/F	1.8	N/F		N/A	N/F	248.05	N/F	N/F	True	N/F	1	2474669	Method	N/A	N/A		PPB	Fail	N/A	N/A	N/A	N/A	N/A		N/A	N/A
55	Processed	190801-055	Unknown		False	A0724									Confirmed	C10[13]CH11N2[15]NO2S	SCNBimaneIS	2474669	1	1	N/A	Internal Standard	604780	1.8	1.88	0.08	M-H	1	250.05	250.05	0.7862	True	N/A	N/A	N/A	Method	N/A	N/A			Pass	Pass	Pass	N/A	Pass	91.961	3 of 5	N/A	N/A
56	Processed	190801-056	Unknown		False	A0824									NotFound		SCNBimane	N/F	N/F	N/A	N/A	Target Compound	N/F	1.8	N/F		N/A	N/F	248.05	N/F	N/F	True	N/F	1	2445753	Method	N/A	N/A		PPB	Fail	N/A	N/A	N/A	N/A	N/A		N/A	N/A
56	Processed	190801-056	Unknown		False	A0824									Confirmed	C10[13]CH11N2[15]NO2S	SCNBimaneIS	2445753	1	1	N/A	Internal Standard	611353	1.8	1.88	0.08	M-H	1	250.05	250.05	0.6642	True	N/A	N/A	N/A	Method	N/A	N/A			Pass	Pass	Pass	N/A	Pass	95.8622	4 of 5	N/A	N/A
57	Processed	190801-057	Unknown		False	A0924									NotFound		SCNBimane	N/F	N/F	N/A	N/A	Target Compound	N/F	1.8	N/F		N/A	N/F	248.05	N/F	N/F	True	N/F	1	2488306	Method	N/A	N/A		PPB	Fail	N/A	N/A	N/A	N/A	N/A		N/A	N/A
57	Processed	190801-057	Unknown		False	A0924									Confirmed	C10[13]CH11N2[15]NO2S	SCNBimaneIS	2488306	1	1	N/A	Internal Standard	622638	1.8	1.88	0.08	M-H	1	250.05	250.05	0.6031	True	N/A	N/A	N/A	Method	N/A	N/A			Pass	Pass	Pass	N/A	Pass	92.1316	3 of 5	N/A	N/A
58	Processed	190801-058	Unknown		False	A1024									NotFound		SCNBimane	N/F	N/F	N/A	N/A	Target Compound	N/F	1.8	N/F		N/A	N/F	248.05	N/F	N/F	True	N/F	1	2372233	Method	N/A	N/A		PPB	Fail	N/A	N/A	N/A	N/A	N/A		N/A	N/A
58	Processed	190801-058	Unknown		False	A1024									Confirmed	C10[13]CH11N2[15]NO2S	SCNBimaneIS	2372233	1	1	N/A	Internal Standard	591090	1.8	1.88	0.08	M-H	1	250.05	250.05	0.5421	True	N/A	N/A	N/A	Method	N/A	N/A			Pass	Pass	Pass	N/A	Pass	92.1446	3 of 5	N/A	N/A
59	Processed	190801-059	Unknown		False	B0124									Confirmed	C11H11N3O2S	SCNBimane	14129610	181.9	N/A	N/A	Target Compound	3645293	1.8	1.88	0.08	M-H	181.9	248.05	248.05	0.5194	True	6.481	1	2180305	Method	N/A	N/A		PPB	Pass	Pass	Pass	N/A	Pass	100	6 of 6	N/A	N/A
59	Processed	190801-059	Unknown		False	B0124									Confirmed	C10[13]CH11N2[15]NO2S	SCNBimaneIS	2180305	1	1	N/A	Internal Standard	521724	1.8	1.88	0.08	M-H	1	250.05	250.051	2.0067	True	N/A	N/A	N/A	Method	N/A	N/A			Pass	Pass	Pass	N/A	Pass	89.3295	3 of 5	N/A	N/A
60	Processed	190801-060	Unknown		False	B0224									Confirmed	C11H11N3O2S	SCNBimane	12753850	180.555	N/A	N/A	Target Compound	3259976	1.8	1.89	0.09	M-H	180.555	248.05	248.05	0.4578	True	6.432	1	1982723	Method	N/A	N/A		PPB	Pass	Pass	Pass	N/A	Pass	93.0167	5 of 6	N/A	N/A
60	Processed	190801-060	Unknown		False	B0224									Confirmed	C10[13]CH11N2[15]NO2S	SCNBimaneIS	1982723	1	1	N/A	Internal Standard	480373	1.8	1.89	0.09	M-H	1	250.05	250.051	1.9456	True	N/A	N/A	N/A	Method	N/A	N/A			Pass	Pass	Pass	N/A	Pass	91.3883	3 of 5	N/A	N/A
61	Processed	190801-061	Unknown		False	B0324									Confirmed	C11H11N3O2S	SCNBimane	12638314	156.43	N/A	N/A	Target Compound	3191028	1.8	1.88	0.08	M-H	156.43	248.05	248.05	0.2118	True	5.57	1	2268969	Method	N/A	N/A		PPB	Pass	Pass	Pass	N/A	Pass	92.5338	5 of 6	N/A	N/A
61	Processed	190801-061	Unknown		False	B0324									Confirmed	C10[13]CH11N2[15]NO2S	SCNBimaneIS	2268969	1	1	N/A	Internal Standard	552515	1.8	1.88	0.08	M-H	1	250.05	250.051	1.8236	True	N/A	N/A	N/A	Method	N/A	N/A			Pass	Pass	Pass	N/A	Pass	91.3248	3 of 5	N/A	N/A
62	Processed	190801-062	Unknown		False	C0124									NotFound		SCNBimane	N/F	N/F	N/A	N/A	Target Compound	N/F	1.8	N/F		N/A	N/F	248.05	N/F	N/F	True	N/F	1	2367154	Method	N/A	N/A		PPB	Fail	N/A	N/A	N/A	N/A	N/A		N/A	N/A
62	Processed	190801-062	Unknown		False	C0124									Confirmed	C10[13]CH11N2[15]NO2S	SCNBimaneIS	2367154	1	1	N/A	Internal Standard	576017	1.8	1.87	0.07	M-H	1	250.05	250.05	0.4811	True	N/A	N/A	N/A	Method	N/A	N/A			Pass	Pass	Pass	N/A	Pass	96.3828	4 of 5	N/A	N/A
63	Processed	190801-063	Unknown		False	C0224									NotFound		SCNBimane	N/F	N/F	N/A	N/A	Target Compound	N/F	1.8	N/F		N/A	N/F	248.05	N/F	N/F	True	N/F	1	2540947	Method	N/A	N/A		PPB	Fail	N/A	N/A	N/A	N/A	N/A		N/A	N/A
63	Processed	190801-063	Unknown		False	C0224									Confirmed	C10[13]CH11N2[15]NO2S	SCNBimaneIS	2540947	1	1	N/A	Internal Standard	624409	1.8	1.87	0.07	M-H	1	250.05	250.05	0.9083	True	N/A	N/A	N/A	Method	N/A	N/A			Pass	Pass	Pass	N/A	Pass	96.2639	4 of 5	N/A	N/A
64	Processed	190801-064	Unknown		False	C0324									NotFound		SCNBimane	N/F	N/F	N/A	N/A	Target Compound	N/F	1.8	N/F		N/A	N/F	248.05	N/F	N/F	True	N/F	1	2457342	Method	N/A	N/A		PPB	Fail	N/A	N/A	N/A	N/A	N/A		N/A	N/A
64	Processed	190801-064	Unknown		False	C0324									Confirmed	C10[13]CH11N2[15]NO2S	SCNBimaneIS	2457342	1	1	N/A	Internal Standard	607499	1.8	1.87	0.07	M-H	1	250.05	250.05	0.6642	True	N/A	N/A	N/A	Method	N/A	N/A			Pass	Pass	Pass	N/A	Pass	92.1876	3 of 5	N/A	N/A
65	Processed	190801-065	Unknown		False	D0124									Confirmed	C11H11N3O2S	SCNBimane	19758862	261.332	N/A	N/A	Target Compound	4893659	1.8	1.87	0.07	M-H	261.332	248.05	248.05	0.5194	True	9.32	1	2120025	Method	N/A	N/A		PPB	Pass	Pass	Pass	N/A	Pass	100	6 of 8	N/A	N/A
65	Processed	190801-065	Unknown		False	D0124									Confirmed	C10[13]CH11N2[15]NO2S	SCNBimaneIS	2120025	1	1	N/A	Internal Standard	514378	1.8	1.88	0.08	M-H	1	250.05	250.051	1.0303	True	N/A	N/A	N/A	Method	N/A	N/A			Pass	Pass	Pass	N/A	Pass	91.4995	3 of 5	N/A	N/A
66	Processed	190801-066	Unknown		False	D0224									Confirmed	C11H11N3O2S	SCNBimane	18847609	252.132	N/A	N/A	Target Compound	4841417	1.8	1.87	0.07	M-H	252.132	248.05	248.05	0.3348	True	8.991	1	2096221	Method	N/A	N/A		PPB	Pass	Pass	Pass	N/A	Pass	100	8 of 8	N/A	N/A
66	Processed	190801-066	Unknown		False	D0224									Confirmed	C10[13]CH11N2[15]NO2S	SCNBimaneIS	2096221	1	1	N/A	Internal Standard	499085	1.8	1.87	0.07	M-H	1	250.05	250.05	0.6642	True	N/A	N/A	N/A	Method	N/A	N/A			Pass	Pass	Pass	N/A	Pass	91.8574	3 of 5	N/A	N/A
67	Processed	190801-067	Unknown		False	D0324									Confirmed	C11H11N3O2S	SCNBimane	20183148	244.859	N/A	N/A	Target Compound	5139136	1.8	1.87	0.07	M-H	244.859	248.05	248.05	0.3348	True	8.731	1	2311605	Method	N/A	N/A		PPB	Pass	Pass	Pass	N/A	Pass	100	7 of 8	N/A	N/A
67	Processed	190801-067	Unknown		False	D0324									Confirmed	C10[13]CH11N2[15]NO2S	SCNBimaneIS	2311605	1	1	N/A	Internal Standard	564908	1.8	1.88	0.08	M-H	1	250.05	250.05	0.7862	True	N/A	N/A	N/A	Method	N/A	N/A			Pass	Pass	Pass	N/A	Pass	91.5239	3 of 5	N/A	N/A
68	Processed	190801-068	Unknown		False	E0124									NotFound		SCNBimane	N/F	N/F	N/A	N/A	Target Compound	N/F	1.8	N/F		N/A	N/F	248.05	N/F	N/F	True	N/F	1	2442457	Method	N/A	N/A		PPB	Fail	N/A	N/A	N/A	N/A	N/A		N/A	N/A
68	Processed	190801-068	Unknown		False	E0124									Confirmed	C10[13]CH11N2[15]NO2S	SCNBimaneIS	2442457	1	1	N/A	Internal Standard	589541	1.8	1.87	0.07	M-H	1	250.05	250.05	0.237	True	N/A	N/A	N/A	Method	N/A	N/A			Pass	Pass	Pass	N/A	Pass	98.9119	4 of 5	N/A	N/A
69	Processed	190801-069	Unknown		False	E0224									NotFound		SCNBimane	N/F	N/F	N/A	N/A	Target Compound	N/F	1.8	N/F		N/A	N/F	248.05	N/F	N/F	True	N/F	1	2400380	Method	N/A	N/A		PPB	Fail	N/A	N/A	N/A	N/A	N/A		N/A	N/A
69	Processed	190801-069	Unknown		False	E0224									Confirmed	C10[13]CH11N2[15]NO2S	SCNBimaneIS	2400380	1	1	N/A	Internal Standard	584315	1.8	1.87	0.07	M-H	1	250.05	250.05	0.5421	True	N/A	N/A	N/A	Method	N/A	N/A			Pass	Pass	Pass	N/A	Pass	98.9052	4 of 5	N/A	N/A
70	Processed	190801-070	Unknown		False	E0324									NotFound		SCNBimane	N/F	N/F	N/A	N/A	Target Compound	N/F	1.8	N/F		N/A	N/F	248.05	N/F	N/F	True	N/F	1	2256210	Method	N/A	N/A		PPB	Fail	N/A	N/A	N/A	N/A	N/A		N/A	N/A
70	Processed	190801-070	Unknown		False	E0324									Confirmed	C10[13]CH11N2[15]NO2S	SCNBimaneIS	2256210	1	1	N/A	Internal Standard	541859	1.8	1.87	0.07	M-H	1	250.05	250.05	0.6642	True	N/A	N/A	N/A	Method	N/A	N/A			Pass	Pass	Pass	N/A	Pass	92.0805	3 of 5	N/A	N/A
71	Processed	190801-071	Unknown		False	E24									NotFound		SCNBimane	N/F	N/F	N/A	N/A	Target Compound	N/F	1.8	N/F		N/A	N/F	248.05	N/F	N/F	True	N/F	1	2359754	Method	N/A	N/A		PPB	Fail	N/A	N/A	N/A	N/A	N/A		N/A	N/A
71	Processed	190801-071	Unknown		False	E24									Confirmed	C10[13]CH11N2[15]NO2S	SCNBimaneIS	2359754	1	1	N/A	Internal Standard	582046	1.8	1.88	0.08	M-H	1	250.05	250.05	0.8472	True	N/A	N/A	N/A	Method	N/A	N/A			Pass	Pass	Pass	N/A	Pass	91.9632	3 of 5	N/A	N/A
72	Processed	190801-072	Unknown		False	5 ppb STD									Confirmed	C11H11N3O2S	SCNBimane	593534	5.592	N/A	N/A	Target Compound	147617	1.8	1.87	0.07	M-H	5.592	248.05	248.05	0.8269	True	0.178	1	3335322	Method	N/A	N/A		PPB	Pass	Pass	Pass	N/A	Pass	62.7831	3 of 5	N/A	N/A
72	Processed	190801-072	Unknown		False	5 ppb STD									Confirmed	C10[13]CH11N2[15]NO2S	SCNBimaneIS	3335322	1	1	N/A	Internal Standard	788224	1.8	1.87	0.07	M-H	1	250.05	250.05	0.7252	True	N/A	N/A	N/A	Method	N/A	N/A			Pass	Pass	Pass	N/A	Pass	100	5 of 5	N/A	N/A
73	Processed	190801-073	Unknown		False	A0124p									NotFound		SCNBimane	N/F	N/F	N/A	N/A	Target Compound	N/F	1.8	N/F		N/A	N/F	248.05	N/F	N/F	True	N/F	1	2550152	Method	N/A	N/A		PPB	Fail	N/A	N/A	N/A	N/A	N/A		N/A	N/A
73	Processed	190801-073	Unknown		False	A0124p									Confirmed	C10[13]CH11N2[15]NO2S	SCNBimaneIS	2550152	1	1	N/A	Internal Standard	613319	1.8	1.87	0.07	M-H	1	250.05	250.05	0.6642	True	N/A	N/A	N/A	Method	N/A	N/A			Pass	Pass	Pass	N/A	Pass	92.1592	3 of 5	N/A	N/A
74	Processed	190801-074	Unknown		False	A0224p									NotFound		SCNBimane	N/F	N/F	N/A	N/A	Target Compound	N/F	1.8	N/F		N/A	N/F	248.05	N/F	N/F	True	N/F	1	2674838	Method	N/A	N/A		PPB	Fail	N/A	N/A	N/A	N/A	N/A		N/A	N/A
74	Processed	190801-074	Unknown		False	A0224p									Confirmed	C10[13]CH11N2[15]NO2S	SCNBimaneIS	2674838	1	1	N/A	Internal Standard	670859	1.8	1.87	0.07	M-H	1	250.05	250.05	0.6031	True	N/A	N/A	N/A	Method	N/A	N/A			Pass	Pass	Pass	N/A	Pass	96.3699	4 of 5	N/A	N/A
75	Processed	190801-075	Unknown		False	A0324p									NotFound		SCNBimane	N/F	N/F	N/A	N/A	Target Compound	N/F	1.8	N/F		N/A	N/F	248.05	N/F	N/F	True	N/F	1	2442244	Method	N/A	N/A		PPB	Fail	N/A	N/A	N/A	N/A	N/A		N/A	N/A
75	Processed	190801-075	Unknown		False	A0324p									Confirmed	C10[13]CH11N2[15]NO2S	SCNBimaneIS	2442244	1	1	N/A	Internal Standard	580347	1.8	1.88	0.08	M-H	1	250.05	250.05	0.359	True	N/A	N/A	N/A	Method	N/A	N/A			Pass	Pass	Pass	N/A	Pass	92.1045	3 of 5	N/A	N/A
76	Processed	190801-076	Unknown		False	A0424p									NotFound		SCNBimane	N/F	N/F	N/A	N/A	Target Compound	N/F	1.8	N/F		N/A	N/F	248.05	N/F	N/F	True	N/F	1	2338408	Method	N/A	N/A		PPB	Fail	N/A	N/A	N/A	N/A	N/A		N/A	N/A
76	Processed	190801-076	Unknown		False	A0424p									Confirmed	C10[13]CH11N2[15]NO2S	SCNBimaneIS	2338408	1	1	N/A	Internal Standard	564371	1.8	1.87	0.07	M-H	1	250.05	250.05	0.8472	True	N/A	N/A	N/A	Method	N/A	N/A			Pass	Pass	Pass	N/A	Pass	92.15	3 of 5	N/A	N/A
77	Processed	190801-077	Unknown		False	A0524p									NotFound		SCNBimane	N/F	N/F	N/A	N/A	Target Compound	N/F	1.8	N/F		N/A	N/F	248.05	N/F	N/F	True	N/F	1	2446617	Method	N/A	N/A		PPB	Fail	N/A	N/A	N/A	N/A	N/A		N/A	N/A
77	Processed	190801-077	Unknown		False	A0524p									Confirmed	C10[13]CH11N2[15]NO2S	SCNBimaneIS	2446617	1	1	N/A	Internal Standard	608614	1.8	1.87	0.07	M-H	1	250.05	250.05	0.7862	True	N/A	N/A	N/A	Method	N/A	N/A			Pass	Pass	Pass	N/A	Pass	92.0256	3 of 5	N/A	N/A
78	Processed	190801-078	Unknown		False	A0624p									NotFound		SCNBimane	N/F	N/F	N/A	N/A	Target Compound	N/F	1.8	N/F		N/A	N/F	248.05	N/F	N/F	True	N/F	1	2449045	Method	N/A	N/A		PPB	Fail	N/A	N/A	N/A	N/A	N/A		N/A	N/A
78	Processed	190801-078	Unknown		False	A0624p									Confirmed	C10[13]CH11N2[15]NO2S	SCNBimaneIS	2449045	1	1	N/A	Internal Standard	597338	1.8	1.87	0.07	M-H	1	250.05	250.05	0.359	True	N/A	N/A	N/A	Method	N/A	N/A			Pass	Pass	Pass	N/A	Pass	92.2226	3 of 5	N/A	N/A
79	Processed	190801-079	Unknown		False	A0724p									NotFound		SCNBimane	N/F	N/F	N/A	N/A	Target Compound	N/F	1.8	N/F		N/A	N/F	248.05	N/F	N/F	True	N/F	1	2349241	Method	N/A	N/A		PPB	Fail	N/A	N/A	N/A	N/A	N/A		N/A	N/A
79	Processed	190801-079	Unknown		False	A0724p									Confirmed	C10[13]CH11N2[15]NO2S	SCNBimaneIS	2349241	1	1	N/A	Internal Standard	569454	1.8	1.87	0.07	M-H	1	250.05	250.05	0.6031	True	N/A	N/A	N/A	Method	N/A	N/A			Pass	Pass	Pass	N/A	Pass	96.2999	4 of 5	N/A	N/A
80	Processed	190801-080	Unknown		False	A0824p									NotFound		SCNBimane	N/F	N/F	N/A	N/A	Target Compound	N/F	1.8	N/F		N/A	N/F	248.05	N/F	N/F	True	N/F	1	2503014	Method	N/A	N/A		PPB	Fail	N/A	N/A	N/A	N/A	N/A		N/A	N/A
80	Processed	190801-080	Unknown		False	A0824p									Confirmed	C10[13]CH11N2[15]NO2S	SCNBimaneIS	2503014	1	1	N/A	Internal Standard	617826	1.8	1.87	0.07	M-H	1	250.05	250.05	0.4811	True	N/A	N/A	N/A	Method	N/A	N/A			Pass	Pass	Pass	N/A	Pass	100	5 of 5	N/A	N/A
81	Processed	190801-081	Unknown		False	A0924p									NotFound		SCNBimane	N/F	N/F	N/A	N/A	Target Compound	N/F	1.8	N/F		N/A	N/F	248.05	N/F	N/F	True	N/F	1	2428538	Method	N/A	N/A		PPB	Fail	N/A	N/A	N/A	N/A	N/A		N/A	N/A
81	Processed	190801-081	Unknown		False	A0924p									Confirmed	C10[13]CH11N2[15]NO2S	SCNBimaneIS	2428538	1	1	N/A	Internal Standard	605639	1.8	1.87	0.07	M-H	1	250.05	250.05	0.6642	True	N/A	N/A	N/A	Method	N/A	N/A			Pass	Pass	Pass	N/A	Pass	96.2978	4 of 5	N/A	N/A
82	Processed	190801-082	Unknown		False	A1024p									NotFound		SCNBimane	N/F	N/F	N/A	N/A	Target Compound	N/F	1.8	N/F		N/A	N/F	248.05	N/F	N/F	True	N/F	1	2282473	Method	N/A	N/A		PPB	Fail	N/A	N/A	N/A	N/A	N/A		N/A	N/A
82	Processed	190801-082	Unknown		False	A1024p									Confirmed	C10[13]CH11N2[15]NO2S	SCNBimaneIS	2282473	1	1	N/A	Internal Standard	543559	1.8	1.87	0.07	M-H	1	250.05	250.05	0.7252	True	N/A	N/A	N/A	Method	N/A	N/A			Pass	Pass	Pass	N/A	Pass	92.0774	3 of 5	N/A	N/A
83	Processed	190801-083	Unknown		False	B0124p									Confirmed	C11H11N3O2S	SCNBimane	14293671	184.882	N/A	N/A	Target Compound	3664940	1.8	1.87	0.07	M-H	184.882	248.05	248.05	0.3348	True	6.587	1	2169928	Method	N/A	N/A		PPB	Pass	Pass	Pass	N/A	Pass	100	6 of 8	N/A	N/A
83	Processed	190801-083	Unknown		False	B0124p									Confirmed	C10[13]CH11N2[15]NO2S	SCNBimaneIS	2169928	1	1	N/A	Internal Standard	529281	1.8	1.87	0.07	M-H	1	250.05	250.051	1.8236	True	N/A	N/A	N/A	Method	N/A	N/A			Pass	Pass	Pass	N/A	Pass	89.6669	3 of 5	N/A	N/A
84	Processed	190801-084	Unknown		False	B0224p									Confirmed	C11H11N3O2S	SCNBimane	16746150	228.667	N/A	N/A	Target Compound	4301762	1.8	1.87	0.07	M-H	228.667	248.05	248.05	0.2118	True	8.152	1	2054137	Method	N/A	N/A		PPB	Pass	Pass	Pass	N/A	Pass	100	5 of 7	N/A	N/A
84	Processed	190801-084	Unknown		False	B0224p									Confirmed	C10[13]CH11N2[15]NO2S	SCNBimaneIS	2054137	1	1	N/A	Internal Standard	508041	1.8	1.87	0.07	M-H	1	250.05	250.05	0.9083	True	N/A	N/A	N/A	Method	N/A	N/A			Pass	Pass	Pass	N/A	Pass	91.6526	3 of 5	N/A	N/A
85	Processed	190801-085	Unknown		False	B0324p									Confirmed	C11H11N3O2S	SCNBimane	16032098	204.671	N/A	N/A	Target Compound	4118787	1.8	1.88	0.08	M-H	204.671	248.05	248.05	0.2733	True	7.295	1	2197810	Method	N/A	N/A		PPB	Pass	Pass	Pass	N/A	Pass	100	5 of 7	N/A	N/A
85	Processed	190801-085	Unknown		False	B0324p									Confirmed	C10[13]CH11N2[15]NO2S	SCNBimaneIS	2197810	1	1	N/A	Internal Standard	540276	1.8	1.87	0.07	M-H	1	250.05	250.05	0.4811	True	N/A	N/A	N/A	Method	N/A	N/A			Pass	Pass	Pass	N/A	Pass	91.8894	3 of 5	N/A	N/A
86	Processed	190801-086	Unknown		False	C0124p									NotFound		SCNBimane	N/F	N/F	N/A	N/A	Target Compound	N/F	1.8	N/F		N/A	N/F	248.05	N/F	N/F	True	N/F	1	2756780	Method	N/A	N/A		PPB	Fail	N/A	N/A	N/A	N/A	N/A		N/A	N/A
86	Processed	190801-086	Unknown		False	C0124p									Confirmed	C10[13]CH11N2[15]NO2S	SCNBimaneIS	2756780	1	1	N/A	Internal Standard	688039	1.8	1.87	0.07	M-H	1	250.05	250.05	0.4201	True	N/A	N/A	N/A	Method	N/A	N/A			Pass	Pass	Pass	N/A	Pass	99.0404	4 of 5	N/A	N/A
87	Processed	190801-087	Unknown		False	C0224p									NotFound		SCNBimane	N/F	N/F	N/A	N/A	Target Compound	N/F	1.8	N/F		N/A	N/F	248.05	N/F	N/F	True	N/F	1	2503146	Method	N/A	N/A		PPB	Fail	N/A	N/A	N/A	N/A	N/A		N/A	N/A
87	Processed	190801-087	Unknown		False	C0224p									Confirmed	C10[13]CH11N2[15]NO2S	SCNBimaneIS	2503146	1	1	N/A	Internal Standard	608075	1.8	1.87	0.07	M-H	1	250.05	250.05	0.7252	True	N/A	N/A	N/A	Method	N/A	N/A			Pass	Pass	Pass	N/A	Pass	92.0166	3 of 5	N/A	N/A
89	Processed	190801-088_INJ001	Unknown		False	C0324p									Identified	C11H11N3O2S	SCNBimane	34263	0.855	N/A	N/A	Target Compound	15997	1.8	1.81	0.01	M-H	0.855	248.05	248.05	-0.2803	True	0.009	1	3978062	Method	N/A	N/A		PPB	Pass	Pass	Fail	N/A	Fail	100	1 of 1	N/A	N/A
89	Processed	190801-088_INJ001	Unknown		False	C0324p									Confirmed	C10[13]CH11N2[15]NO2S	SCNBimaneIS	3978062	1	1	N/A	Internal Standard	998011	1.8	1.81	0.01	M-H	1	250.05	250.05	-0.1902	True	N/A	N/A	N/A	Method	N/A	N/A			Pass	Pass	Pass	N/A	Pass	98.9272	4 of 5	N/A	N/A
88	Processed	190801-088_restart	Unknown		False	C0324p									Identified	C11H11N3O2S	SCNBimane	7354	0.676	N/A	N/A	Target Compound	4815	1.8	1.8	0.00	M-H	0.676	248.05	248.05	0.3348	True	0.002	1	3308840	Method	N/A	N/A		PPB	Pass	Pass	Fail	N/A	Fail	100	1 of 1	N/A	N/A
88	Processed	190801-088_restart	Unknown		False	C0324p									Confirmed	C10[13]CH11N2[15]NO2S	SCNBimaneIS	3308840	1	1	N/A	Internal Standard	874377	1.8	1.81	0.01	M-H	1	250.05	250.05	-0.0071	True	N/A	N/A	N/A	Method	N/A	N/A			Pass	Pass	Pass	N/A	Pass	96.4802	4 of 5	N/A	N/A
90	Processed	190801-090	Unknown		False	D0224p									Confirmed	C11H11N3O2S	SCNBimane	37595044	396.66	N/A	N/A	Target Compound	10124147	1.8	1.8	0.00	M-H	396.66	248.05	248.05	-0.2803	True	14.158	1	2655438	Method	N/A	N/A		PPB	Pass	Pass	Pass	N/A	Pass	100	7 of 9	N/A	N/A
90	Processed	190801-090	Unknown		False	D0224p									Confirmed	C10[13]CH11N2[15]NO2S	SCNBimaneIS	2655438	1	1	N/A	Internal Standard	697350	1.8	1.8	0.00	M-H	1	250.05	250.05	0.115	True	N/A	N/A	N/A	Method	N/A	N/A			Pass	Pass	Pass	N/A	Pass	92.008	3 of 5	N/A	N/A
91	Processed	190801-091	Unknown		False	D0324p									Confirmed	C11H11N3O2S	SCNBimane	29773972	249.345	N/A	N/A	Target Compound	8107357	1.8	1.8	0.00	M-H	249.345	248.05	248.05	-0.4649	True	8.892	1	3348552	Method	N/A	N/A		PPB	Pass	Pass	Pass	N/A	Pass	100	7 of 9	N/A	N/A
91	Processed	190801-091	Unknown		False	D0324p									Confirmed	C10[13]CH11N2[15]NO2S	SCNBimaneIS	3348552	1	1	N/A	Internal Standard	864756	1.8	1.8	0.00	M-H	1	250.05	250.05	-0.3732	True	N/A	N/A	N/A	Method	N/A	N/A			Pass	Pass	Pass	N/A	Pass	90.8451	3 of 5	N/A	N/A
92	Processed	190801-092	Unknown		False	E0124p									Identified	C11H11N3O2S	SCNBimane	23011	0.769	N/A	N/A	Target Compound	7452	1.8	1.78	-0.02	M-H	0.769	248.05	248.05	-0.957	True	0.006	1	4139905	Method	N/A	N/A		PPB	Pass	Pass	Fail	N/A	Fail	100	1 of 1	N/A	N/A
92	Processed	190801-092	Unknown		False	E0124p									Confirmed	C10[13]CH11N2[15]NO2S	SCNBimaneIS	4139905	1	1	N/A	Internal Standard	1061387	1.8	1.79	-0.01	M-H	1	250.05	250.05	-0.0071	True	N/A	N/A	N/A	Method	N/A	N/A			Pass	Pass	Pass	N/A	Pass	100	5 of 5	N/A	N/A
93	Processed	190801-093	Unknown		False	E0224p									Identified	C11H11N3O2S	SCNBimane	28118	0.807	N/A	N/A	Target Compound	10731	1.8	1.79	-0.01	M-H	0.807	248.05	248.05	-0.4649	True	0.007	1	4065515	Method	N/A	N/A		PPB	Pass	Pass	Fail	N/A	Fail	100	1 of 1	N/A	N/A
93	Processed	190801-093	Unknown		False	E0224p									Confirmed	C10[13]CH11N2[15]NO2S	SCNBimaneIS	4065515	1	1	N/A	Internal Standard	1044306	1.8	1.79	-0.01	M-H	1	250.05	250.05	0.0539	True	N/A	N/A	N/A	Method	N/A	N/A			Pass	Pass	Pass	N/A	Pass	100	5 of 5	N/A	N/A
94	Processed	190801-094	Unknown		False	E0324p									Identified	C11H11N3O2S	SCNBimane	25202	0.785	N/A	N/A	Target Compound	11027	1.8	1.78	-0.02	M-H	0.785	248.05	248.05	-0.834	True	0.006	1	4116291	Method	N/A	N/A		PPB	Pass	Pass	Fail	N/A	Fail	100	1 of 1	N/A	N/A
94	Processed	190801-094	Unknown		False	E0324p									Confirmed	C10[13]CH11N2[15]NO2S	SCNBimaneIS	4116291	1	1	N/A	Internal Standard	1043393	1.8	1.78	-0.02	M-H	1	250.05	250.05	-0.1902	True	N/A	N/A	N/A	Method	N/A	N/A			Pass	Pass	Pass	N/A	Pass	100	5 of 5	N/A	N/A
95	Processed	190801-095	Unknown		False	E24P									Identified	C11H11N3O2S	SCNBimane	22245	0.768	N/A	N/A	Target Compound	10274	1.8	1.79	-0.01	M-H	0.768	248.05	248.05	-0.1573	True	0.006	1	4017286	Method	N/A	N/A		PPB	Pass	Pass	Fail	N/A	Fail	100	1 of 1	N/A	N/A
95	Processed	190801-095	Unknown		False	E24P									Confirmed	C10[13]CH11N2[15]NO2S	SCNBimaneIS	4017286	1	1	N/A	Internal Standard	1018127	1.8	1.79	-0.01	M-H	1	250.05	250.05	-0.1902	True	N/A	N/A	N/A	Method	N/A	N/A			Pass	Pass	Pass	N/A	Pass	100	5 of 5	N/A	N/A
96	Processed	190801-096	Unknown		False	10 ppb STD									Identified	C11H11N3O2S	SCNBimane	2311223	12.346	N/A	N/A	Target Compound	619918	1.8	1.79	-0.01	M-H	12.346	248.05	248.05	-0.0958	True	0.419	1	5510466	Method	N/A	N/A		PPB	Pass	Pass	Fail	N/A	Pass	58.3662	4 of 6	N/A	N/A
96	Processed	190801-096	Unknown		False	10 ppb STD									Confirmed	C10[13]CH11N2[15]NO2S	SCNBimaneIS	5510466	1	1	N/A	Internal Standard	1382301	1.8	1.79	-0.01	M-H	1	250.05	250.05	0.0539	True	N/A	N/A	N/A	Method	N/A	N/A			Pass	Pass	Pass	N/A	Pass	100	5 of 5	N/A	N/A
[truncated: 12 more columns]

## Sheet: Data
Sample Type	Level	Sample ID	Area	IS Area	Response Ratio	Calculated Amt	Concentration Ratio
Unknown		E0204		1188346
Unknown		E0304	8295	1128982	0.007	0.819	0.00854701
Unknown		A0108		1169379
Unknown		A0208	590781	1151289	0.513	14.968	0.0342731
Unknown		A0308	85661	1329332	0.064	2.416	0.0264901
Unknown		A0408	425577	1300673	0.327	9.767	0.0334801
Unknown		A0508	802282	1629303	0.492	14.388	0.0341952
Unknown		A0608	1248870	1623974	0.769	22.126	0.0347555
Unknown		A0708	888057	1784277	0.498	14.537	0.0342574
Unknown		A0808	960046	1683306	0.57	16.568	0.0344037
Unknown		A0908	2622930	1764851	1.486	42.188	0.0352233
Unknown		A1008	2029039	1620084	1.252	35.649	0.0351202
Unknown		C0108		1893368
Unknown		C0208		2056872
Unknown		C0308		1982251
Unknown		E0108		2001298
Unknown		E0208	10566	1889180	0.0055929
Unknown		E0308		1818158
Unknown		A0116		1762907
Unknown		5 ppbSTD	582780	2396910	0.243	7.415	0.0327714
Unknown		A0216		1881444
Unknown		A0316		1765100
Unknown		A0416		1935927
Unknown		A0516		1962922
Unknown		A0616		2118107
Unknown		A0716		2198204
Unknown		A0816		2103341
Unknown		A0916	592345	2051031	0.289	8.693	0.0332451
Unknown		A1016	1059208	1886370	0.562	16.321	0.0344342
Unknown		C0116		2195096
Unknown		C0216		2163373
Unknown		C0316		2282800
Unknown		E0116		2302065
Unknown		E0216		2256872
Unknown		E0316		2129306
Unknown		Blank		2965441
Unknown		A0124		2598620
Unknown		A0224		2446739
Unknown		A0324		2404114
Unknown		A0424		2466808
Unknown		A0524		2728548
Unknown		A0624		2291502
Unknown		A0724		2474669
Unknown		A0824		2445753
Unknown		A0924		2488306
Unknown		A1024		2372233
Unknown		C0124		2367154
Unknown		C0224		2540947
Unknown		C0324		2457342
Unknown		E0124		2442457
Unknown		E0224		2400380
Unknown		E0324		2256210
Unknown		E24		2359754
Unknown		5 ppb STD	593534	3335322	0.178	5.592	0.0318312
Unknown		A0124p		2550152
Unknown		A0224p		2674838
Unknown		A0324p		2442244
Unknown		A0424p		2338408
Unknown		A0524p		2446617
Unknown		A0624p		2449045
Unknown		A0724p		2349241
Unknown		A0824p		2503014
Unknown		A0924p		2428538
Unknown		A1024p		2282473
Unknown		C0124p		2756780
Unknown		C0224p		2503146
Unknown		C0324p	34263	3978062	0.009	0.855	0.0105263
Unknown		C0324p	7354	3308840	0.002	0.676	0.00295858
Unknown		E0124p	23011	4139905	0.006	0.769	0.00780234
Unknown		E0224p	28118	4065515	0.007	0.807	0.0086741
Unknown		E0324p	25202	4116291	0.006	0.785	0.00764331
Unknown		E24P	22245	4017286	0.006	0.768	0.0078125
Unknown		10 ppb STD	2311223	5510466	0.419	12.346	0.0339381
