# Supplementary material for: The determination of thiocyanate in the blood plasma and holding water of Amphiprion clarkii after exposure to cyanide
Source: PeerJ. 2021 Dec 7;9:e12409. doi: 10.7717/peerj.12409 (PMC8663612; doi:10.7717/peerj.12409)
Supplement: Supplemental Information 11 [file peerj-09-12409-s011.xlsx]

## Sheet: All Samples
Acquisition Order	Status	Filename	Sample Type	Level	Excluded	Sample ID	Sample Name	Comments	ColumnHeader1	ColumnHeader2	ColumnHeader3	ColumnHeader4	ColumnHeader5	ColumnHeader6	Confirm	Formula	Compound	Area	Calculated Amt	Theoretical Amt	%Diff	Compound Type	Height	Expected RT	Actual RT	RT Delta	Adduct	Sample Amt	m/z (Expected)	m/z (Apex)	m/z (Delta(ppm))	Active	Response Ratio	ISTD Amt	ISTD Response	Integration Mode	%RSD	%CV	Channel	Final Units	PK	IR	IP	LS	FI	Isotopic Pattern Score (%)	Num Isotopes Matched	Lib Match Name	Library Score (%)
1	Processed	190801-3-001	Unknown		False	A0136									NotFound		SCNBimane	N/F	N/F	N/A	N/A	Target Compound	N/F	1.8	N/F		N/A	N/F	248.05	N/F	N/F	True	N/F	1	1918293	Method	N/A	N/A		PPB	Fail	N/A	N/A	N/A	N/A	N/A		N/A	N/A
1	Processed	190801-3-001	Unknown		False	A0136									Confirmed	C10[13]CH11N2[15]NO2S	SCNBimaneIS	1918293	1	1	N/A	Internal Standard	506224	1.8	1.79	-0.01	M-H	1	250.05	250.05	-0.0681	True	N/A	N/A	N/A	Method	N/A	N/A			Pass	Pass	Pass	N/A	Pass	98.7133	3 of 4	N/A	N/A
2	Processed	190801-3-002	Unknown		False	A0236									Identified	C11H11N3O2S	SCNBimane	18873	0.938	N/A	N/A	Target Compound	8405	1.8	1.8	0.00	M-H	0.938	248.05	248.05	-1.3261	True	0.012	1	1626211	Method	N/A	N/A		PPB	Pass	Pass	Fail	N/A	Fail	100	1 of 1	N/A	N/A
2	Processed	190801-3-002	Unknown		False	A0236									Confirmed	C10[13]CH11N2[15]NO2S	SCNBimaneIS	1626211	1	1	N/A	Internal Standard	426278	1.8	1.79	-0.01	M-H	1	250.05	250.05	-0.2512	True	N/A	N/A	N/A	Method	N/A	N/A			Pass	Pass	Pass	N/A	Pass	98.7738	3 of 4	N/A	N/A
3	Processed	190801-3-003	Unknown		False	A0336									Identified	C11H11N3O2S	SCNBimane	11268	0.867	N/A	N/A	Target Compound	4168	1.8	1.79	-0.01	M-H	0.867	248.05	248.049	-2.4334	True	0.009	1	1243737	Method	N/A	N/A		PPB	Pass	Pass	Fail	N/A	Fail	100	1 of 1	N/A	N/A
3	Processed	190801-3-003	Unknown		False	A0336									Identified	C10[13]CH11N2[15]NO2S	SCNBimaneIS	1243737	1	1	N/A	Internal Standard	329735	1.8	1.79	-0.01	M-H	1	250.05	250.05	-0.1291	True	N/A	N/A	N/A	Method	N/A	N/A			Pass	Pass	Pass	N/A	Fail	100	3 of 3	N/A	N/A
4	Processed	190801-3-004	Unknown		False	A0436									NotFound		SCNBimane	N/F	N/F	N/A	N/A	Target Compound	N/F	1.8	N/F		N/A	N/F	248.05	N/F	N/F	True	N/F	1	1340232	Method	N/A	N/A		PPB	Fail	N/A	N/A	N/A	N/A	N/A		N/A	N/A
4	Processed	190801-3-004	Unknown		False	A0436									Identified	C10[13]CH11N2[15]NO2S	SCNBimaneIS	1340232	1	1	N/A	Internal Standard	351327	1.8	1.79	-0.01	M-H	1	250.05	250.05	0.115	True	N/A	N/A	N/A	Method	N/A	N/A			Pass	Pass	Pass	N/A	Fail	100	3 of 3	N/A	N/A
5	Processed	190801-3-005	Unknown		False	A0536									Identified	C11H11N3O2S	SCNBimane	9903	0.859	N/A	N/A	Target Compound	3615	1.8	1.8	0.00	M-H	0.859	248.05	248.05	1.0115	True	0.009	1	1129955	Method	N/A	N/A		PPB	Pass	Pass	Fail	N/A	Fail	100	1 of 1	N/A	N/A
5	Processed	190801-3-005	Unknown		False	A0536									Identified	C10[13]CH11N2[15]NO2S	SCNBimaneIS	1129955	1	1	N/A	Internal Standard	313054	1.8	1.79	-0.01	M-H	1	250.05	250.05	0.176	True	N/A	N/A	N/A	Method	N/A	N/A			Pass	Pass	Pass	N/A	Fail	100	3 of 3	N/A	N/A
6	Processed	190801-3-006	Unknown		False	A0636									NotFound		SCNBimane	N/F	N/F	N/A	N/A	Target Compound	N/F	1.8	N/F		N/A	N/F	248.05	N/F	N/F	True	N/F	1	1044774	Method	N/A	N/A		PPB	Fail	N/A	N/A	N/A	N/A	N/A		N/A	N/A
6	Processed	190801-3-006	Unknown		False	A0636									Identified	C10[13]CH11N2[15]NO2S	SCNBimaneIS	1044774	1	1	N/A	Internal Standard	266714	1.8	1.79	-0.01	M-H	1	250.05	250.05	0.176	True	N/A	N/A	N/A	Method	N/A	N/A			Pass	Pass	Pass	N/A	Fail	100	3 of 3	N/A	N/A
7	Processed	190801-3-007	Unknown		False	A0736									NotFound		SCNBimane	N/F	N/F	N/A	N/A	Target Compound	N/F	1.8	N/F		N/A	N/F	248.05	N/F	N/F	True	N/F	1	1016047	Method	N/A	N/A		PPB	Fail	N/A	N/A	N/A	N/A	N/A		N/A	N/A
7	Processed	190801-3-007	Unknown		False	A0736									Confirmed	C10[13]CH11N2[15]NO2S	SCNBimaneIS	1016047	1	1	N/A	Internal Standard	272147	1.8	1.79	-0.01	M-H	1	250.05	250.05	-0.0071	True	N/A	N/A	N/A	Method	N/A	N/A			Pass	Pass	Pass	N/A	Pass	100	3 of 3	N/A	N/A
8	Processed	190801-3-008	Unknown		False	A0836									NotFound		SCNBimane	N/F	N/F	N/A	N/A	Target Compound	N/F	1.8	N/F		N/A	N/F	248.05	N/F	N/F	True	N/F	1	743640	Method	N/A	N/A		PPB	Fail	N/A	N/A	N/A	N/A	N/A		N/A	N/A
8	Processed	190801-3-008	Unknown		False	A0836									Identified	C10[13]CH11N2[15]NO2S	SCNBimaneIS	743640	1	1	N/A	Internal Standard	196694	1.8	1.79	-0.01	M-H	1	250.05	250.05	0.6031	True	N/A	N/A	N/A	Method	N/A	N/A			Pass	Pass	Pass	N/A	Fail	100	3 of 3	N/A	N/A
9	Processed	190801-3-009	Unknown		False	A0936									NotFound		SCNBimane	N/F	N/F	N/A	N/A	Target Compound	N/F	1.8	N/F		N/A	N/F	248.05	N/F	N/F	True	N/F	1	678829	Method	N/A	N/A		PPB	Fail	N/A	N/A	N/A	N/A	N/A		N/A	N/A
9	Processed	190801-3-009	Unknown		False	A0936									Identified	C10[13]CH11N2[15]NO2S	SCNBimaneIS	678829	1	1	N/A	Internal Standard	172765	1.8	1.79	-0.01	M-H	1	250.05	250.05	0.298	True	N/A	N/A	N/A	Method	N/A	N/A			Pass	Pass	Pass	N/A	Fail	100	3 of 3	N/A	N/A
10	Processed	190801-3-010	Unknown		False	A1036									NotFound		SCNBimane	N/F	N/F	N/A	N/A	Target Compound	N/F	1.8	N/F		N/A	N/F	248.05	N/F	N/F	True	N/F	1	360533	Method	N/A	N/A		PPB	Fail	N/A	N/A	N/A	N/A	N/A		N/A	N/A
10	Processed	190801-3-010	Unknown		False	A1036									Identified	C10[13]CH11N2[15]NO2S	SCNBimaneIS	360533	1	1	N/A	Internal Standard	99898	1.8	1.78	-0.02	M-H	1	250.05	250.05	-0.0681	True	N/A	N/A	N/A	Method	N/A	N/A			Pass	Pass	Pass	N/A	Fail	66.5791	2 of 3	N/A	N/A
11	Processed	190801-3-011	Unknown		False	B0136									Confirmed	C11H11N3O2S	SCNBimane	741531	204.683	N/A	N/A	Target Compound	222335	1.8	1.79	-0.01	M-H	204.683	248.05	248.05	-0.0343	True	7.295	1	101649	Method	N/A	N/A		PPB	Pass	Pass	Pass	N/A	Pass	95.2832	3 of 3	N/A	N/A
11	Processed	190801-3-011	Unknown		False	B0136									Identified	C10[13]CH11N2[15]NO2S	SCNBimaneIS	101649	1	1	N/A	Internal Standard	34101	1.8	1.78	-0.02	M-H	1	250.05	250.051	2.0677	True	N/A	N/A	N/A	Method	N/A	N/A			Pass	Pass	Pass	N/A	Fail	100	2 of 2	N/A	N/A
12	Processed	190801-3-012	Unknown		False	B0236									Confirmed	C11H11N3O2S	SCNBimane	1029959	326.74	N/A	N/A	Target Compound	296785	1.8	1.79	-0.01	M-H	326.74	248.05	248.05	0.0272	True	11.658	1	88346	Method	N/A	N/A		PPB	Pass	Pass	Pass	N/A	Pass	92.4937	3 of 4	N/A	N/A
12	Processed	190801-3-012	Unknown		False	B0236									Identified	C10[13]CH11N2[15]NO2S	SCNBimaneIS	88346	1	1	N/A	Internal Standard	28841	1.8	1.79	-0.01	M-H	1	250.05	250.05	0.237	True	N/A	N/A	N/A	Method	N/A	N/A			Pass	Pass	Fail	N/A	Fail	100	1 of 1	N/A	N/A
13	Processed	190801-3-013	Unknown		False	B0336									Confirmed	C11H11N3O2S	SCNBimane	15715914	217.147	N/A	N/A	Target Compound	4286979	1.8	1.79	-0.01	M-H	217.147	248.05	248.05	0.3348	True	7.741	1	2030323	Method	N/A	N/A		PPB	Pass	Pass	Pass	N/A	Pass	100	4 of 5	N/A	N/A
13	Processed	190801-3-013	Unknown		False	B0336									Confirmed	C10[13]CH11N2[15]NO2S	SCNBimaneIS	2030323	1	1	N/A	Internal Standard	545477	1.8	1.79	-0.01	M-H	1	250.05	250.05	0.5421	True	N/A	N/A	N/A	Method	N/A	N/A			Pass	Pass	Pass	N/A	Pass	91.7757	3 of 5	N/A	N/A
14	Processed	190801-3-014	Unknown		False	C0136									Identified	C11H11N3O2S	SCNBimane	8582	0.728	N/A	N/A	Target Compound	4794	1.8	1.79	-0.01	M-H	0.728	248.05	248.05	0.5809	True	0.004	1	2106479	Method	N/A	N/A		PPB	Pass	Pass	Fail	N/A	Fail	100	1 of 1	N/A	N/A
14	Processed	190801-3-014	Unknown		False	C0136									Confirmed	C10[13]CH11N2[15]NO2S	SCNBimaneIS	2106479	1	1	N/A	Internal Standard	545846	1.8	1.79	-0.01	M-H	1	250.05	250.05	0.298	True	N/A	N/A	N/A	Method	N/A	N/A			Pass	Pass	Pass	N/A	Pass	92.0273	3 of 5	N/A	N/A
15	Processed	190801-3-015	Unknown		False	C0236									Identified	C11H11N3O2S	SCNBimane	6333	0.716	N/A	N/A	Target Compound	4120	1.8	1.82	0.02	M-H	0.716	248.05	248.05	-0.7725	True	0.004	1	1733833	Method	N/A	N/A		PPB	Pass	Pass	Fail	N/A	Fail	100	1 of 1	N/A	N/A
15	Processed	190801-3-015	Unknown		False	C0236									Confirmed	C10[13]CH11N2[15]NO2S	SCNBimaneIS	1733833	1	1	N/A	Internal Standard	439858	1.8	1.79	-0.01	M-H	1	250.05	250.05	0.176	True	N/A	N/A	N/A	Method	N/A	N/A			Pass	Pass	Pass	N/A	Pass	98.8	3 of 4	N/A	N/A
16	Processed	190801-3-016	Unknown		False	C0336									NotFound		SCNBimane	N/F	N/F	N/A	N/A	Target Compound	N/F	1.8	N/F		N/A	N/F	248.05	N/F	N/F	True	N/F	1	1629341	Method	N/A	N/A		PPB	Fail	N/A	N/A	N/A	N/A	N/A		N/A	N/A
16	Processed	190801-3-016	Unknown		False	C0336									Confirmed	C10[13]CH11N2[15]NO2S	SCNBimaneIS	1629341	1	1	N/A	Internal Standard	426970	1.8	1.8	0.00	M-H	1	250.05	250.05	0.7862	True	N/A	N/A	N/A	Method	N/A	N/A			Pass	Pass	Pass	N/A	Pass	100	3 of 3	N/A	N/A
17	Processed	190801-3-017	Unknown		False	D0136									Confirmed	C11H11N3O2S	SCNBimane	14135430	227.104	N/A	N/A	Target Compound	3833110	1.8	1.8	0.00	M-H	227.104	248.05	248.05	0.7654	True	8.097	1	1745867	Method	N/A	N/A		PPB	Pass	Pass	Pass	N/A	Pass	100	5 of 5	N/A	N/A
17	Processed	190801-3-017	Unknown		False	D0136									Identified	C10[13]CH11N2[15]NO2S	SCNBimaneIS	1745867	1	1	N/A	Internal Standard	468933	1.8	1.8	0.00	M-H	1	250.05	250.051	2.7389	True	N/A	N/A	N/A	Method	N/A	N/A			Pass	Pass	Pass	N/A	Fail	100	4 of 4	N/A	N/A
18	Processed	190801-3-018	Unknown		False	D0236									Confirmed	C11H11N3O2S	SCNBimane	13643007	247.574	N/A	N/A	Target Compound	3677302	1.8	1.8	0.00	M-H	247.574	248.05	248.05	0.3348	True	8.828	1	1545374	Method	N/A	N/A		PPB	Pass	Pass	Pass	N/A	Pass	100	6 of 6	N/A	N/A
18	Processed	190801-3-018	Unknown		False	D0236									Confirmed	C10[13]CH11N2[15]NO2S	SCNBimaneIS	1545374	1	1	N/A	Internal Standard	397727	1.8	1.8	0.00	M-H	1	250.05	250.05	0.6642	True	N/A	N/A	N/A	Method	N/A	N/A			Pass	Pass	Pass	N/A	Pass	100	3 of 3	N/A	N/A
19	Processed	190801-3-019	Unknown		False	D0336									Confirmed	C11H11N3O2S	SCNBimane	11819601	246.994	N/A	N/A	Target Compound	3216341	1.8	1.81	0.01	M-H	246.994	248.05	248.05	0.5194	True	8.808	1	1341987	Method	N/A	N/A		PPB	Pass	Pass	Pass	N/A	Pass	100	6 of 6	N/A	N/A
19	Processed	190801-3-019	Unknown		False	D0336									Confirmed	C10[13]CH11N2[15]NO2S	SCNBimaneIS	1341987	1	1	N/A	Internal Standard	348722	1.8	1.81	0.01	M-H	1	250.05	250.051	2.2508	True	N/A	N/A	N/A	Method	N/A	N/A			Pass	Pass	Pass	N/A	Pass	100	3 of 3	N/A	N/A
20	Processed	190801-3-020	Unknown		False	E0136									NotFound		SCNBimane	N/F	N/F	N/A	N/A	Target Compound	N/F	1.8	N/F		N/A	N/F	248.05	N/F	N/F	True	N/F	1	1163151	Method	N/A	N/A		PPB	Fail	N/A	N/A	N/A	N/A	N/A		N/A	N/A
20	Processed	190801-3-020	Unknown		False	E0136									Confirmed	C10[13]CH11N2[15]NO2S	SCNBimaneIS	1163151	1	1	N/A	Internal Standard	308843	1.8	1.8	0.00	M-H	1	250.05	250.051	1.1523	True	N/A	N/A	N/A	Method	N/A	N/A			Pass	Pass	Pass	N/A	Pass	100	3 of 3	N/A	N/A
21	Processed	190801-3-021	Unknown		False	E0236									NotFound		SCNBimane	N/F	N/F	N/A	N/A	Target Compound	N/F	1.8	N/F		N/A	N/F	248.05	N/F	N/F	True	N/F	1	1051664	Method	N/A	N/A		PPB	Fail	N/A	N/A	N/A	N/A	N/A		N/A	N/A
21	Processed	190801-3-021	Unknown		False	E0236									Confirmed	C10[13]CH11N2[15]NO2S	SCNBimaneIS	1051664	1	1	N/A	Internal Standard	267484	1.8	1.8	0.00	M-H	1	250.05	250.05	0.7252	True	N/A	N/A	N/A	Method	N/A	N/A			Pass	Pass	Pass	N/A	Pass	100	3 of 3	N/A	N/A
22	Processed	190801-3-022	Unknown		False	E0336									NotFound		SCNBimane	N/F	N/F	N/A	N/A	Target Compound	N/F	1.8	N/F		N/A	N/F	248.05	N/F	N/F	True	N/F	1	734562	Method	N/A	N/A		PPB	Fail	N/A	N/A	N/A	N/A	N/A		N/A	N/A
22	Processed	190801-3-022	Unknown		False	E0336									Identified	C10[13]CH11N2[15]NO2S	SCNBimaneIS	734562	1	1	N/A	Internal Standard	203703	1.8	1.8	0.00	M-H	1	250.05	250.05	0.7252	True	N/A	N/A	N/A	Method	N/A	N/A			Pass	Pass	Pass	N/A	Fail	66.6895	2 of 3	N/A	N/A
23	Processed	190801-3-023	Unknown		False	25 ppb STD									Identified	C11H11N3O2S	SCNBimane	283040	26.929	N/A	N/A	Target Compound	81579	1.8	1.8	0.00	M-H	26.929	248.05	248.05	0.4578	True	0.941	1	300883	Method	N/A	N/A		PPB	Pass	Pass	Fail	N/A	Pass	57.6302	2 of 3	N/A	N/A
23	Processed	190801-3-023	Unknown		False	25 ppb STD									Identified	C10[13]CH11N2[15]NO2S	SCNBimaneIS	300883	1	1	N/A	Internal Standard	80792	1.8	1.8	0.00	M-H	1	250.05	250.051	1.7626	True	N/A	N/A	N/A	Method	N/A	N/A			Pass	Pass	Pass	N/A	Fail	66.5906	2 of 3	N/A	N/A
24	Processed	190801-3-024	Unknown		False	Blank									NotFound		SCNBimane	N/F	N/F	N/A	N/A	Target Compound	N/F	1.8	N/F		N/A	N/F	248.05	N/F	N/F	True	N/F	1	221151	Method	N/A	N/A		PPB	Fail	N/A	N/A	N/A	N/A	N/A		N/A	N/A
24	Processed	190801-3-024	Unknown		False	Blank									Identified	C10[13]CH11N2[15]NO2S	SCNBimaneIS	221151	1	1	N/A	Internal Standard	61609	1.8	1.79	-0.01	M-H	1	250.05	250.05	0.7862	True	N/A	N/A	N/A	Method	N/A	N/A			Pass	Pass	Pass	N/A	Fail	66.9344	2 of 3	N/A	N/A
25	Processed	190801-3-025	Unknown		False	A0148									Identified	C11H11N3O2S	SCNBimane	14570	0.793	N/A	N/A	Target Compound	8406	1.8	1.82	0.02	M-H	0.793	248.05	248.05	-0.2188	True	0.006	1	2276546	Method	N/A	N/A		PPB	Pass	Pass	Fail	N/A	Fail	100	1 of 1	N/A	N/A
25	Processed	190801-3-025	Unknown		False	A0148									Confirmed	C10[13]CH11N2[15]NO2S	SCNBimaneIS	2276546	1	1	N/A	Internal Standard	603990	1.8	1.8	0.00	M-H	1	250.05	250.05	0.5421	True	N/A	N/A	N/A	Method	N/A	N/A			Pass	Pass	Pass	N/A	Pass	96.4325	4 of 5	N/A	N/A
26	Processed	190801-3-026	Unknown		False	A0248									Identified	C11H11N3O2S	SCNBimane	11299	0.753	N/A	N/A	Target Compound	6480	1.8	1.79	-0.01	M-H	0.753	248.05	248.05	0.3348	True	0.005	1	2263758	Method	N/A	N/A		PPB	Pass	Pass	Fail	N/A	Fail	100	1 of 1	N/A	N/A
26	Processed	190801-3-026	Unknown		False	A0248									Confirmed	C10[13]CH11N2[15]NO2S	SCNBimaneIS	2263758	1	1	N/A	Internal Standard	577055	1.8	1.8	0.00	M-H	1	250.05	250.05	0.4811	True	N/A	N/A	N/A	Method	N/A	N/A			Pass	Pass	Pass	N/A	Pass	92.2129	3 of 5	N/A	N/A
27	Processed	190801-3-027	Unknown		False	A0348									NotFound		SCNBimane	N/F	N/F	N/A	N/A	Target Compound	N/F	1.8	N/F		N/A	N/F	248.05	N/F	N/F	True	N/F	1	2213721	Method	N/A	N/A		PPB	Fail	N/A	N/A	N/A	N/A	N/A		N/A	N/A
27	Processed	190801-3-027	Unknown		False	A0348									Confirmed	C10[13]CH11N2[15]NO2S	SCNBimaneIS	2213721	1	1	N/A	Internal Standard	559109	1.8	1.8	0.00	M-H	1	250.05	250.05	0.298	True	N/A	N/A	N/A	Method	N/A	N/A			Pass	Pass	Pass	N/A	Pass	92.1888	3 of 5	N/A	N/A
28	Processed	190801-3-028	Unknown		False	A0448									NotFound		SCNBimane	N/F	N/F	N/A	N/A	Target Compound	N/F	1.8	N/F		N/A	N/F	248.05	N/F	N/F	True	N/F	1	2174088	Method	N/A	N/A		PPB	Fail	N/A	N/A	N/A	N/A	N/A		N/A	N/A
28	Processed	190801-3-028	Unknown		False	A0448									Confirmed	C10[13]CH11N2[15]NO2S	SCNBimaneIS	2174088	1	1	N/A	Internal Standard	590414	1.8	1.8	0.00	M-H	1	250.05	250.05	0.4201	True	N/A	N/A	N/A	Method	N/A	N/A			Pass	Pass	Pass	N/A	Pass	98.7646	3 of 4	N/A	N/A
29	Processed	190801-3-029	Unknown		False	A0548									NotFound		SCNBimane	N/F	N/F	N/A	N/A	Target Compound	N/F	1.8	N/F		N/A	N/F	248.05	N/F	N/F	True	N/F	1	801420	Method	N/A	N/A		PPB	Fail	N/A	N/A	N/A	N/A	N/A		N/A	N/A
29	Processed	190801-3-029	Unknown		False	A0548									Confirmed	C10[13]CH11N2[15]NO2S	SCNBimaneIS	801420	1	1	N/A	Internal Standard	209499	1.8	1.81	0.01	M-H	1	250.05	250.05	0.176	True	N/A	N/A	N/A	Method	N/A	N/A			Pass	Pass	Pass	N/A	Pass	100	3 of 3	N/A	N/A
30	Processed	190801-3-030	Unknown		False	A0648									NotFound		SCNBimane	N/F	N/F	N/A	N/A	Target Compound	N/F	1.8	N/F		N/A	N/F	248.05	N/F	N/F	True	N/F	1	1915880	Method	N/A	N/A		PPB	Fail	N/A	N/A	N/A	N/A	N/A		N/A	N/A
30	Processed	190801-3-030	Unknown		False	A0648									Confirmed	C10[13]CH11N2[15]NO2S	SCNBimaneIS	1915880	1	1	N/A	Internal Standard	510063	1.8	1.8	0.00	M-H	1	250.05	250.05	0.237	True	N/A	N/A	N/A	Method	N/A	N/A			Pass	Pass	Pass	N/A	Pass	99.0021	3 of 4	N/A	N/A
31	Processed	190801-3-031	Unknown		False	A0748									NotFound		SCNBimane	N/F	N/F	N/A	N/A	Target Compound	N/F	1.8	N/F		N/A	N/F	248.05	N/F	N/F	True	N/F	1	1564387	Method	N/A	N/A		PPB	Fail	N/A	N/A	N/A	N/A	N/A		N/A	N/A
31	Processed	190801-3-031	Unknown		False	A0748									Confirmed	C10[13]CH11N2[15]NO2S	SCNBimaneIS	1564387	1	1	N/A	Internal Standard	422144	1.8	1.8	0.00	M-H	1	250.05	250.05	0.359	True	N/A	N/A	N/A	Method	N/A	N/A			Pass	Pass	Pass	N/A	Pass	100	3 of 3	N/A	N/A
32	Processed	190801-3-032	Unknown		False	A0848									NotFound		SCNBimane	N/F	N/F	N/A	N/A	Target Compound	N/F	1.8	N/F		N/A	N/F	248.05	N/F	N/F	True	N/F	1	1328704	Method	N/A	N/A		PPB	Fail	N/A	N/A	N/A	N/A	N/A		N/A	N/A
32	Processed	190801-3-032	Unknown		False	A0848									Confirmed	C10[13]CH11N2[15]NO2S	SCNBimaneIS	1328704	1	1	N/A	Internal Standard	336051	1.8	1.8	0.00	M-H	1	250.05	250.05	0.298	True	N/A	N/A	N/A	Method	N/A	N/A			Pass	Pass	Pass	N/A	Pass	100	3 of 3	N/A	N/A
33	Processed	190801-3-033	Unknown		False	A0948									NotFound		SCNBimane	N/F	N/F	N/A	N/A	Target Compound	N/F	1.8	N/F		N/A	N/F	248.05	N/F	N/F	True	N/F	1	983599	Method	N/A	N/A		PPB	Fail	N/A	N/A	N/A	N/A	N/A		N/A	N/A
33	Processed	190801-3-033	Unknown		False	A0948									Confirmed	C10[13]CH11N2[15]NO2S	SCNBimaneIS	983599	1	1	N/A	Internal Standard	276023	1.8	1.8	0.00	M-H	1	250.05	250.05	0.4201	True	N/A	N/A	N/A	Method	N/A	N/A			Pass	Pass	Pass	N/A	Pass	100	3 of 3	N/A	N/A
34	Processed	190801-3-034	Unknown		False	A1048									NotFound		SCNBimane	N/F	N/F	N/A	N/A	Target Compound	N/F	1.8	N/F		N/A	N/F	248.05	N/F	N/F	True	N/F	1	744579	Method	N/A	N/A		PPB	Fail	N/A	N/A	N/A	N/A	N/A		N/A	N/A
34	Processed	190801-3-034	Unknown		False	A1048									Confirmed	C10[13]CH11N2[15]NO2S	SCNBimaneIS	744579	1	1	N/A	Internal Standard	211234	1.8	1.81	0.01	M-H	1	250.05	250.05	0.6642	True	N/A	N/A	N/A	Method	N/A	N/A			Pass	Pass	Pass	N/A	Pass	66.654	2 of 3	N/A	N/A
35	Processed	190801-3-035	Unknown		False	B0148									Confirmed	C11H11N3O2S	SCNBimane	1484703	202.605	N/A	N/A	Target Compound	413864	1.8	1.8	0.00	M-H	202.605	248.05	248.05	0.2733	True	7.221	1	205617	Method	N/A	N/A		PPB	Pass	Pass	Pass	N/A	Pass	95.2679	4 of 4	N/A	N/A
35	Processed	190801-3-035	Unknown		False	B0148									Identified	C10[13]CH11N2[15]NO2S	SCNBimaneIS	205617	1	1	N/A	Internal Standard	63420	1.8	1.8	0.00	M-H	1	250.05	250.051	1.0913	True	N/A	N/A	N/A	Method	N/A	N/A			Pass	Pass	Fail	N/A	Fail	42.5502	1 of 2	N/A	N/A
36	Processed	190801-3-036	Unknown		False	B0248									Confirmed	C11H11N3O2S	SCNBimane	1011269	195.444	N/A	N/A	Target Compound	293730	1.8	1.8	0.00	M-H	195.444	248.05	248.05	0.4578	True	6.965	1	145198	Method	N/A	N/A		PPB	Pass	Pass	Pass	N/A	Pass	91.401	3 of 4	N/A	N/A
36	Processed	190801-3-036	Unknown		False	B0248									Identified	C10[13]CH11N2[15]NO2S	SCNBimaneIS	145198	1	1	N/A	Internal Standard	40975	1.8	1.8	0.00	M-H	1	250.05	250.05	0.7252	True	N/A	N/A	N/A	Method	N/A	N/A			Pass	Pass	Fail	N/A	Fail	40.058	1 of 2	N/A	N/A
37	Processed	190801-3-037	Unknown		False	B0348									Confirmed	C11H11N3O2S	SCNBimane	19532278	278.561	N/A	N/A	Target Compound	5352965	1.8	1.8	0.00	M-H	278.561	248.05	248.05	0.0888	True	9.936	1	1965812	Method	N/A	N/A		PPB	Pass	Pass	Pass	N/A	Pass	100	5 of 5	N/A	N/A
37	Processed	190801-3-037	Unknown		False	B0348									Confirmed	C10[13]CH11N2[15]NO2S	SCNBimaneIS	1965812	1	1	N/A	Internal Standard	533637	1.8	1.8	0.00	M-H	1	250.05	250.05	0.298	True	N/A	N/A	N/A	Method	N/A	N/A			Pass	Pass	Pass	N/A	Pass	98.2156	3 of 4	N/A	N/A
38	Processed	190801-3-038	Unknown		False	C0148									Identified	C11H11N3O2S	SCNBimane	10753	0.755	N/A	N/A	Target Compound	3843	1.8	1.81	0.01	M-H	0.755	248.05	248.05	0.3348	True	0.005	1	2126434	Method	N/A	N/A		PPB	Pass	Pass	Fail	N/A	Pass	100	1 of 1	N/A	N/A
38	Processed	190801-3-038	Unknown		False	C0148									Confirmed	C10[13]CH11N2[15]NO2S	SCNBimaneIS	2126434	1	1	N/A	Internal Standard	560031	1.8	1.8	0.00	M-H	1	250.05	250.05	0.298	True	N/A	N/A	N/A	Method	N/A	N/A			Pass	Pass	Pass	N/A	Pass	98.7762	3 of 4	N/A	N/A
39	Processed	190801-3-039	Unknown		False	C0248									NotFound		SCNBimane	N/F	N/F	N/A	N/A	Target Compound	N/F	1.8	N/F		N/A	N/F	248.05	N/F	N/F	True	N/F	1	2203920	Method	N/A	N/A		PPB	Fail	N/A	N/A	N/A	N/A	N/A		N/A	N/A
39	Processed	190801-3-039	Unknown		False	C0248									Confirmed	C10[13]CH11N2[15]NO2S	SCNBimaneIS	2203920	1	1	N/A	Internal Standard	560920	1.8	1.8	0.00	M-H	1	250.05	250.05	0.4811	True	N/A	N/A	N/A	Method	N/A	N/A			Pass	Pass	Pass	N/A	Pass	98.8886	3 of 4	N/A	N/A
40	Processed	190801-3-040	Unknown		False	C0348									NotFound		SCNBimane	N/F	N/F	N/A	N/A	Target Compound	N/F	1.8	N/F		N/A	N/F	248.05	N/F	N/F	True	N/F	1	2209942	Method	N/A	N/A		PPB	Fail	N/A	N/A	N/A	N/A	N/A		N/A	N/A
40	Processed	190801-3-040	Unknown		False	C0348									Confirmed	C10[13]CH11N2[15]NO2S	SCNBimaneIS	2209942	1	1	N/A	Internal Standard	574647	1.8	1.81	0.01	M-H	1	250.05	250.05	0.4811	True	N/A	N/A	N/A	Method	N/A	N/A			Pass	Pass	Pass	N/A	Pass	92.1845	3 of 5	N/A	N/A
41	Processed	190801-3-041	Unknown		False	D0148									Confirmed	C11H11N3O2S	SCNBimane	16734900	278.579	N/A	N/A	Target Compound	4508543	1.8	1.81	0.01	M-H	278.579	248.05	248.05	-0.0958	True	9.937	1	1684162	Method	N/A	N/A		PPB	Pass	Pass	Pass	N/A	Pass	100	5 of 5	N/A	N/A
41	Processed	190801-3-041	Unknown		False	D0148									Confirmed	C10[13]CH11N2[15]NO2S	SCNBimaneIS	1684162	1	1	N/A	Internal Standard	440694	1.8	1.81	0.01	M-H	1	250.05	250.051	1.5185	True	N/A	N/A	N/A	Method	N/A	N/A			Pass	Pass	Pass	N/A	Pass	100	3 of 3	N/A	N/A
42	Processed	190801-3-042	Unknown		False	D0248									Confirmed	C11H11N3O2S	SCNBimane	16600627	265.678	N/A	N/A	Target Compound	4501984	1.8	1.81	0.01	M-H	265.678	248.05	248.05	0.2118	True	9.475	1	1751959	Method	N/A	N/A		PPB	Pass	Pass	Pass	N/A	Pass	100	5 of 5	N/A	N/A
42	Processed	190801-3-042	Unknown		False	D0248									Confirmed	C10[13]CH11N2[15]NO2S	SCNBimaneIS	1751959	1	1	N/A	Internal Standard	459363	1.8	1.8	0.00	M-H	1	250.05	250.05	0.7252	True	N/A	N/A	N/A	Method	N/A	N/A			Pass	Pass	Pass	N/A	Pass	100	3 of 3	N/A	N/A
43	Processed	190801-3-043	Unknown		False	D0348									Confirmed	C11H11N3O2S	SCNBimane	14365039	253.06	N/A	N/A	Target Compound	3927628	1.8	1.81	0.01	M-H	253.06	248.05	248.05	-0.0343	True	9.024	1	1591801	Method	N/A	N/A		PPB	Pass	Pass	Pass	N/A	Pass	100	5 of 5	N/A	N/A
43	Processed	190801-3-043	Unknown		False	D0348									Confirmed	C10[13]CH11N2[15]NO2S	SCNBimaneIS	1591801	1	1	N/A	Internal Standard	426172	1.8	1.81	0.01	M-H	1	250.05	250.051	1.3964	True	N/A	N/A	N/A	Method	N/A	N/A			Pass	Pass	Pass	N/A	Pass	100	3 of 3	N/A	N/A
44	Processed	190801-3-044	Unknown		False	E0148									NotFound		SCNBimane	N/F	N/F	N/A	N/A	Target Compound	N/F	1.8	N/F		N/A	N/F	248.05	N/F	N/F	True	N/F	1	1372702	Method	N/A	N/A		PPB	Fail	N/A	N/A	N/A	N/A	N/A		N/A	N/A
44	Processed	190801-3-044	Unknown		False	E0148									Identified	C10[13]CH11N2[15]NO2S	SCNBimaneIS	1372702	1	1	N/A	Internal Standard	355961	1.8	1.8	0.00	M-H	1	250.05	250.05	0.4201	True	N/A	N/A	N/A	Method	N/A	N/A			Pass	Pass	Pass	N/A	Fail	100	3 of 3	N/A	N/A
45	Processed	190801-3-045	Unknown		False	E0248									NotFound		SCNBimane	N/F	N/F	N/A	N/A	Target Compound	N/F	1.8	N/F		N/A	N/F	248.05	N/F	N/F	True	N/F	1	1030622	Method	N/A	N/A		PPB	Fail	N/A	N/A	N/A	N/A	N/A		N/A	N/A
45	Processed	190801-3-045	Unknown		False	E0248									Confirmed	C10[13]CH11N2[15]NO2S	SCNBimaneIS	1030622	1	1	N/A	Internal Standard	264898	1.8	1.81	0.01	M-H	1	250.05	250.05	0.359	True	N/A	N/A	N/A	Method	N/A	N/A			Pass	Pass	Pass	N/A	Pass	100	3 of 3	N/A	N/A
46	Processed	190801-3-046	Unknown		False	E0348									NotFound		SCNBimane	N/F	N/F	N/A	N/A	Target Compound	N/F	1.8	N/F		N/A	N/F	248.05	N/F	N/F	True	N/F	1	698810	Method	N/A	N/A		PPB	Fail	N/A	N/A	N/A	N/A	N/A		N/A	N/A
46	Processed	190801-3-046	Unknown		False	E0348									Identified	C10[13]CH11N2[15]NO2S	SCNBimaneIS	698810	1	1	N/A	Internal Standard	181362	1.8	1.81	0.01	M-H	1	250.05	250.05	0.298	True	N/A	N/A	N/A	Method	N/A	N/A			Pass	Pass	Pass	N/A	Fail	100	3 of 3	N/A	N/A
47	Processed	190801-3-047	Unknown		False	E48									NotFound		SCNBimane	N/F	N/F	N/A	N/A	Target Compound	N/F	1.8	N/F		N/A	N/F	248.05	N/F	N/F	True	N/F	1	197386	Method	N/A	N/A		PPB	Fail	N/A	N/A	N/A	N/A	N/A		N/A	N/A
47	Processed	190801-3-047	Unknown		False	E48									Identified	C10[13]CH11N2[15]NO2S	SCNBimaneIS	197386	1	1	N/A	Internal Standard	61282	1.8	1.8	0.00	M-H	1	250.05	250.051	1.0303	True	N/A	N/A	N/A	Method	N/A	N/A			Pass	Pass	Pass	N/A	Fail	100	2 of 2	N/A	N/A
48	Processed	190801-3-048	Unknown		False	50 ppb STD									Confirmed	C11H11N3O2S	SCNBimane	482372	64.124	N/A	N/A	Target Compound	135474	1.8	1.8	0.00	M-H	64.124	248.05	248.05	0.5194	True	2.27	1	212466	Method	N/A	N/A		PPB	Pass	Pass	Pass	N/A	Pass	82.8661	2 of 4	N/A	N/A
48	Processed	190801-3-048	Unknown		False	50 ppb STD									Identified	C10[13]CH11N2[15]NO2S	SCNBimaneIS	212466	1	1	N/A	Internal Standard	59876	1.8	1.8	0.00	M-H	1	250.05	250.051	1.5795	True	N/A	N/A	N/A	Method	N/A	N/A			Pass	Pass	Pass	N/A	Fail	66.1264	2 of 3	N/A	N/A
49	Processed	190801-3-049	Unknown		False	A0172									Identified	C11H11N3O2S	SCNBimane	20881	0.882	N/A	N/A	Target Compound	11077	1.8	1.81	0.01	M-H	0.882	248.05	248.05	-0.0343	True	0.01	1	2174922	Method	N/A	N/A		PPB	Pass	Pass	Fail	N/A	Fail	100	1 of 1	N/A	N/A
49	Processed	190801-3-049	Unknown		False	A0172									Confirmed	C10[13]CH11N2[15]NO2S	SCNBimaneIS	2174922	1	1	N/A	Internal Standard	574733	1.8	1.81	0.01	M-H	1	250.05	250.05	0.176	True	N/A	N/A	N/A	Method	N/A	N/A			Pass	Pass	Pass	N/A	Pass	100	4 of 4	N/A	N/A
50	Processed	190801-3-050	Unknown		False	A0272									Identified	C11H11N3O2S	SCNBimane	5993	0.693	N/A	N/A	Target Compound	3904	1.8	1.81	0.01	M-H	0.693	248.05	248.05	1.196	True	0.003	1	2119314	Method	N/A	N/A		PPB	Pass	Pass	Fail	N/A	Fail	100	1 of 1	N/A	N/A
50	Processed	190801-3-050	Unknown		False	A0272									Confirmed	C10[13]CH11N2[15]NO2S	SCNBimaneIS	2119314	1	1	N/A	Internal Standard	565121	1.8	1.8	0.00	M-H	1	250.05	250.05	0.237	True	N/A	N/A	N/A	Method	N/A	N/A			Pass	Pass	Pass	N/A	Pass	98.6809	3 of 4	N/A	N/A
51	Processed	190801-3-051	Unknown		False	A0372									NotFound		SCNBimane	N/F	N/F	N/A	N/A	Target Compound	N/F	1.8	N/F		N/A	N/F	248.05	N/F	N/F	True	N/F	1	1844445	Method	N/A	N/A		PPB	Fail	N/A	N/A	N/A	N/A	N/A		N/A	N/A
51	Processed	190801-3-051	Unknown		False	A0372									Confirmed	C10[13]CH11N2[15]NO2S	SCNBimaneIS	1844445	1	1	N/A	Internal Standard	501897	1.8	1.8	0.00	M-H	1	250.05	250.05	0.237	True	N/A	N/A	N/A	Method	N/A	N/A			Pass	Pass	Pass	N/A	Pass	98.8363	3 of 4	N/A	N/A
52	Processed	190801-3-052	Unknown		False	A0472									NotFound		SCNBimane	N/F	N/F	N/A	N/A	Target Compound	N/F	1.8	N/F		N/A	N/F	248.05	N/F	N/F	True	N/F	1	1962118	Method	N/A	N/A		PPB	Fail	N/A	N/A	N/A	N/A	N/A		N/A	N/A
52	Processed	190801-3-052	Unknown		False	A0472									Confirmed	C10[13]CH11N2[15]NO2S	SCNBimaneIS	1962118	1	1	N/A	Internal Standard	509826	1.8	1.81	0.01	M-H	1	250.05	250.05	0.298	True	N/A	N/A	N/A	Method	N/A	N/A			Pass	Pass	Pass	N/A	Pass	98.6498	3 of 4	N/A	N/A
53	Processed	190801-3-053	Unknown		False	A0572									NotFound		SCNBimane	N/F	N/F	N/A	N/A	Target Compound	N/F	1.8	N/F		N/A	N/F	248.05	N/F	N/F	True	N/F	1	1800351	Method	N/A	N/A		PPB	Fail	N/A	N/A	N/A	N/A	N/A		N/A	N/A
53	Processed	190801-3-053	Unknown		False	A0572									Confirmed	C10[13]CH11N2[15]NO2S	SCNBimaneIS	1800351	1	1	N/A	Internal Standard	473757	1.8	1.81	0.01	M-H	1	250.05	250.05	-0.1902	True	N/A	N/A	N/A	Method	N/A	N/A			Pass	Pass	Pass	N/A	Pass	98.6685	3 of 4	N/A	N/A
54	Processed	190801-3-054	Unknown		False	B0172									Confirmed	C11H11N3O2S	SCNBimane	13277343	218.014	N/A	N/A	Target Compound	3737774	1.8	1.8	0.00	M-H	218.014	248.05	248.05	0.0272	True	7.772	1	1708448	Method	N/A	N/A		PPB	Pass	Pass	Pass	N/A	Pass	100	5 of 5	N/A	N/A
54	Processed	190801-3-054	Unknown		False	B0172									Confirmed	C10[13]CH11N2[15]NO2S	SCNBimaneIS	1708448	1	1	N/A	Internal Standard	468150	1.8	1.81	0.01	M-H	1	250.05	250.051	1.2134	True	N/A	N/A	N/A	Method	N/A	N/A			Pass	Pass	Pass	N/A	Pass	100	3 of 3	N/A	N/A
55	Processed	190801-3-055	Unknown		False	B0272									Confirmed	C11H11N3O2S	SCNBimane	8132069	143.343	N/A	N/A	Target Compound	2253400	1.8	1.8	0.00	M-H	143.343	248.05	248.05	0.2118	True	5.102	1	1593824	Method	N/A	N/A		PPB	Pass	Pass	Pass	N/A	Pass	92.1039	4 of 5	N/A	N/A
55	Processed	190801-3-055	Unknown		False	B0272									Confirmed	C10[13]CH11N2[15]NO2S	SCNBimaneIS	1593824	1	1	N/A	Internal Standard	432468	1.8	1.81	0.01	M-H	1	250.05	250.051	1.8846	True	N/A	N/A	N/A	Method	N/A	N/A			Pass	Pass	Pass	N/A	Pass	100	3 of 3	N/A	N/A
56	Processed	190801-3-056	Unknown		False	B0372									Confirmed	C11H11N3O2S	SCNBimane	7871210	229.022	N/A	N/A	Target Compound	2132134	1.8	1.81	0.01	M-H	229.022	248.05	248.05	0.2118	True	8.165	1	964008	Method	N/A	N/A		PPB	Pass	Pass	Pass	N/A	Pass	100	5 of 5	N/A	N/A
56	Processed	190801-3-056	Unknown		False	B0372									Identified	C10[13]CH11N2[15]NO2S	SCNBimaneIS	964008	1	1	N/A	Internal Standard	260699	1.8	1.81	0.01	M-H	1	250.05	250.051	2.0677	True	N/A	N/A	N/A	Method	N/A	N/A			Pass	Pass	Pass	N/A	Fail	100	3 of 3	N/A	N/A
57	Processed	190801-3-057	Unknown		False	C0172									NotFound		SCNBimane	N/F	N/F	N/A	N/A	Target Compound	N/F	1.8	N/F		N/A	N/F	248.05	N/F	N/F	True	N/F	1	787368	Method	N/A	N/A		PPB	Fail	N/A	N/A	N/A	N/A	N/A		N/A	N/A
57	Processed	190801-3-057	Unknown		False	C0172									Identified	C10[13]CH11N2[15]NO2S	SCNBimaneIS	787368	1	1	N/A	Internal Standard	209600	1.8	1.8	0.00	M-H	1	250.05	250.05	0.6031	True	N/A	N/A	N/A	Method	N/A	N/A			Pass	Pass	Pass	N/A	Fail	66.6035	2 of 3	N/A	N/A
58	Processed	190801-3-058	Unknown		False	C0272									NotFound		SCNBimane	N/F	N/F	N/A	N/A	Target Compound	N/F	1.8	N/F		N/A	N/F	248.05	N/F	N/F	True	N/F	1	476900	Method	N/A	N/A		PPB	Fail	N/A	N/A	N/A	N/A	N/A		N/A	N/A
58	Processed	190801-3-058	Unknown		False	C0272									Identified	C10[13]CH11N2[15]NO2S	SCNBimaneIS	476900	1	1	N/A	Internal Standard	137496	1.8	1.81	0.01	M-H	1	250.05	250.05	-0.0681	True	N/A	N/A	N/A	Method	N/A	N/A			Pass	Pass	Pass	N/A	Fail	66.3926	2 of 3	N/A	N/A
59	Processed	190801-3-059	Unknown		False	C0372									NotFound		SCNBimane	N/F	N/F	N/A	N/A	Target Compound	N/F	1.8	N/F		N/A	N/F	248.05	N/F	N/F	True	N/F	1	135865	Method	N/A	N/A		PPB	Fail	N/A	N/A	N/A	N/A	N/A		N/A	N/A
59	Processed	190801-3-059	Unknown		False	C0372									Identified	C10[13]CH11N2[15]NO2S	SCNBimaneIS	135865	1	1	N/A	Internal Standard	37729	1.8	1.81	0.01	M-H	1	250.05	250.05	0.7252	True	N/A	N/A	N/A	Method	N/A	N/A			Pass	Pass	Fail	N/A	Fail	37.4977	1 of 2	N/A	N/A
60	Processed	190801-3-060	Unknown		False	D0172									Confirmed	C11H11N3O2S	SCNBimane	1306384	533.68	N/A	N/A	Target Compound	362596	1.8	1.82	0.02	M-H	533.68	248.05	248.05	0.1503	True	19.056	1	68555	Method	N/A	N/A		PPB	Pass	Pass	Pass	N/A	Pass	94.9862	3 of 3	N/A	N/A
60	Processed	190801-3-060	Unknown		False	D0172									Identified	C10[13]CH11N2[15]NO2S	SCNBimaneIS	68555	1	1	N/A	Internal Standard	22317	1.8	1.81	0.01	M-H	1	250.05	250.05	0.9083	True	N/A	N/A	N/A	Method	N/A	N/A			Pass	Pass	Fail	N/A	Fail	100	1 of 1	N/A	N/A
61	Processed	190801-3-061	Unknown		False	D0272									Confirmed	C11H11N3O2S	SCNBimane	17099163	217.105	N/A	N/A	Target Compound	4859004	1.8	1.81	0.01	M-H	217.105	248.05	248.05	0.1503	True	7.739	1	2209455	Method	N/A	N/A		PPB	Pass	Pass	Pass	N/A	Pass	100	6 of 6	N/A	N/A
61	Processed	190801-3-061	Unknown		False	D0272									Confirmed	C10[13]CH11N2[15]NO2S	SCNBimaneIS	2209455	1	1	N/A	Internal Standard	585587	1.8	1.81	0.01	M-H	1	250.05	250.05	0.7862	True	N/A	N/A	N/A	Method	N/A	N/A			Pass	Pass	Pass	N/A	Pass	97.7362	3 of 4	N/A	N/A
62	Processed	190801-3-062	Unknown		False	D0372									Confirmed	C11H11N3O2S	SCNBimane	18217487	245.939	N/A	N/A	Target Compound	5022527	1.8	1.8	0.00	M-H	245.939	248.05	248.05	0.5809	True	8.77	1	2077290	Method	N/A	N/A		PPB	Pass	Pass	Pass	N/A	Pass	100	6 of 6	N/A	N/A
62	Processed	190801-3-062	Unknown		False	D0372									Confirmed	C10[13]CH11N2[15]NO2S	SCNBimaneIS	2077290	1	1	N/A	Internal Standard	528243	1.8	1.81	0.01	M-H	1	250.05	250.05	0.4811	True	N/A	N/A	N/A	Method	N/A	N/A			Pass	Pass	Pass	N/A	Pass	97.6972	3 of 4	N/A	N/A
63	Processed	190801-3-063	Unknown		False	E0172									NotFound		SCNBimane	N/F	N/F	N/A	N/A	Target Compound	N/F	1.8	N/F		N/A	N/F	248.05	N/F	N/F	True	N/F	1	2322292	Method	N/A	N/A		PPB	Fail	N/A	N/A	N/A	N/A	N/A		N/A	N/A
63	Processed	190801-3-063	Unknown		False	E0172									Confirmed	C10[13]CH11N2[15]NO2S	SCNBimaneIS	2322292	1	1	N/A	Internal Standard	583883	1.8	1.81	0.01	M-H	1	250.05	250.05	0.4811	True	N/A	N/A	N/A	Method	N/A	N/A			Pass	Pass	Pass	N/A	Pass	98.6827	3 of 4	N/A	N/A
64	Processed	190801-3-064	Unknown		False	E0272									NotFound		SCNBimane	N/F	N/F	N/A	N/A	Target Compound	N/F	1.8	N/F		N/A	N/F	248.05	N/F	N/F	True	N/F	1	2065328	Method	N/A	N/A		PPB	Fail	N/A	N/A	N/A	N/A	N/A		N/A	N/A
64	Processed	190801-3-064	Unknown		False	E0272									Confirmed	C10[13]CH11N2[15]NO2S	SCNBimaneIS	2065328	1	1	N/A	Internal Standard	544319	1.8	1.81	0.01	M-H	1	250.05	250.05	0.5421	True	N/A	N/A	N/A	Method	N/A	N/A			Pass	Pass	Pass	N/A	Pass	98.8884	3 of 4	N/A	N/A
65	Processed	190801-3-065	Unknown		False	E0372									NotFound		SCNBimane	N/F	N/F	N/A	N/A	Target Compound	N/F	1.8	N/F		N/A	N/F	248.05	N/F	N/F	True	N/F	1	1908368	Method	N/A	N/A		PPB	Fail	N/A	N/A	N/A	N/A	N/A		N/A	N/A
65	Processed	190801-3-065	Unknown		False	E0372									Confirmed	C10[13]CH11N2[15]NO2S	SCNBimaneIS	1908368	1	1	N/A	Internal Standard	493396	1.8	1.81	0.01	M-H	1	250.05	250.05	0.359	True	N/A	N/A	N/A	Method	N/A	N/A			Pass	Pass	Pass	N/A	Pass	98.7468	3 of 4	N/A	N/A
66	Processed	190801-3-066	Unknown		False	E 72									NotFound		SCNBimane	N/F	N/F	N/A	N/A	Target Compound	N/F	1.8	N/F		N/A	N/F	248.05	N/F	N/F	True	N/F	1	1858552	Method	N/A	N/A		PPB	Fail	N/A	N/A	N/A	N/A	N/A		N/A	N/A
66	Processed	190801-3-066	Unknown		False	E 72									Confirmed	C10[13]CH11N2[15]NO2S	SCNBimaneIS	1858552	1	1	N/A	Internal Standard	473963	1.8	1.82	0.02	M-H	1	250.05	250.05	-0.0071	True	N/A	N/A	N/A	Method	N/A	N/A			Pass	Pass	Pass	N/A	Pass	100	3 of 3	N/A	N/A
67	Processed	190801-3-067	Unknown		False	Blank									Identified	C11H11N3O2S	SCNBimane	9448	0.719	N/A	N/A	Target Compound	4941	1.8	1.84	0.04	M-H	0.719	248.05	248.05	-0.1573	True	0.004	1	2517745	Method	N/A	N/A		PPB	Pass	Pass	Fail	N/A	Fail	100	1 of 1	N/A	N/A
67	Processed	190801-3-067	Unknown		False	Blank									Confirmed	C10[13]CH11N2[15]NO2S	SCNBimaneIS	2517745	1	1	N/A	Internal Standard	648677	1.8	1.82	0.02	M-H	1	250.05	250.05	0.4201	True	N/A	N/A	N/A	Method	N/A	N/A			Pass	Pass	Pass	N/A	Pass	92.3242	3 of 5	N/A	N/A
[truncated: 12 more columns]

## Sheet: Filtered
Acquisition Order	Status	Filename	Sample Type	Level	Excluded	Sample ID	Sample Name	Comments	ColumnHeader1	ColumnHeader2	ColumnHeader3	ColumnHeader4	ColumnHeader5	ColumnHeader6	Confirm	Formula	Compound	Area	Calculated Amt	Theoretical Amt	%Diff	Compound Type	Height	Expected RT	Actual RT	RT Delta	Adduct	Sample Amt	m/z (Expected)	m/z (Apex)	m/z (Delta(ppm))	Active	Response Ratio	ISTD Amt	ISTD Response	Integration Mode	%RSD	%CV	Channel	Final Units	PK	IR	IP	LS	FI	Isotopic Pattern Score (%)	Num Isotopes Matched	Lib Match Name	Library Score (%)
1	Processed	190801-3-001	Unknown		False	A0136									NotFound		SCNBimane	N/F	N/F	N/A	N/A	Target Compound	N/F	1.8	N/F		N/A	N/F	248.05	N/F	N/F	True	N/F	1	1918293	Method	N/A	N/A		PPB	Fail	N/A	N/A	N/A	N/A	N/A		N/A	N/A
1	Processed	190801-3-001	Unknown		False	A0136									Confirmed	C10[13]CH11N2[15]NO2S	SCNBimaneIS	1918293	1	1	N/A	Internal Standard	506224	1.8	1.79	-0.01	M-H	1	250.05	250.05	-0.0681	True	N/A	N/A	N/A	Method	N/A	N/A			Pass	Pass	Pass	N/A	Pass	98.7133	3 of 4	N/A	N/A
2	Processed	190801-3-002	Unknown		False	A0236									Identified	C11H11N3O2S	SCNBimane	18873	0.938	N/A	N/A	Target Compound	8405	1.8	1.8	0.00	M-H	0.938	248.05	248.05	-1.3261	True	0.012	1	1626211	Method	N/A	N/A		PPB	Pass	Pass	Fail	N/A	Fail	100	1 of 1	N/A	N/A
2	Processed	190801-3-002	Unknown		False	A0236									Confirmed	C10[13]CH11N2[15]NO2S	SCNBimaneIS	1626211	1	1	N/A	Internal Standard	426278	1.8	1.79	-0.01	M-H	1	250.05	250.05	-0.2512	True	N/A	N/A	N/A	Method	N/A	N/A			Pass	Pass	Pass	N/A	Pass	98.7738	3 of 4	N/A	N/A
3	Processed	190801-3-003	Unknown		False	A0336									Identified	C11H11N3O2S	SCNBimane	11268	0.867	N/A	N/A	Target Compound	4168	1.8	1.79	-0.01	M-H	0.867	248.05	248.049	-2.4334	True	0.009	1	1243737	Method	N/A	N/A		PPB	Pass	Pass	Fail	N/A	Fail	100	1 of 1	N/A	N/A
3	Processed	190801-3-003	Unknown		False	A0336									Identified	C10[13]CH11N2[15]NO2S	SCNBimaneIS	1243737	1	1	N/A	Internal Standard	329735	1.8	1.79	-0.01	M-H	1	250.05	250.05	-0.1291	True	N/A	N/A	N/A	Method	N/A	N/A			Pass	Pass	Pass	N/A	Fail	100	3 of 3	N/A	N/A
4	Processed	190801-3-004	Unknown		False	A0436									NotFound		SCNBimane	N/F	N/F	N/A	N/A	Target Compound	N/F	1.8	N/F		N/A	N/F	248.05	N/F	N/F	True	N/F	1	1340232	Method	N/A	N/A		PPB	Fail	N/A	N/A	N/A	N/A	N/A		N/A	N/A
4	Processed	190801-3-004	Unknown		False	A0436									Identified	C10[13]CH11N2[15]NO2S	SCNBimaneIS	1340232	1	1	N/A	Internal Standard	351327	1.8	1.79	-0.01	M-H	1	250.05	250.05	0.115	True	N/A	N/A	N/A	Method	N/A	N/A			Pass	Pass	Pass	N/A	Fail	100	3 of 3	N/A	N/A
5	Processed	190801-3-005	Unknown		False	A0536									Identified	C11H11N3O2S	SCNBimane	9903	0.859	N/A	N/A	Target Compound	3615	1.8	1.8	0.00	M-H	0.859	248.05	248.05	1.0115	True	0.009	1	1129955	Method	N/A	N/A		PPB	Pass	Pass	Fail	N/A	Fail	100	1 of 1	N/A	N/A
5	Processed	190801-3-005	Unknown		False	A0536									Identified	C10[13]CH11N2[15]NO2S	SCNBimaneIS	1129955	1	1	N/A	Internal Standard	313054	1.8	1.79	-0.01	M-H	1	250.05	250.05	0.176	True	N/A	N/A	N/A	Method	N/A	N/A			Pass	Pass	Pass	N/A	Fail	100	3 of 3	N/A	N/A
6	Processed	190801-3-006	Unknown		False	A0636									NotFound		SCNBimane	N/F	N/F	N/A	N/A	Target Compound	N/F	1.8	N/F		N/A	N/F	248.05	N/F	N/F	True	N/F	1	1044774	Method	N/A	N/A		PPB	Fail	N/A	N/A	N/A	N/A	N/A		N/A	N/A
6	Processed	190801-3-006	Unknown		False	A0636									Identified	C10[13]CH11N2[15]NO2S	SCNBimaneIS	1044774	1	1	N/A	Internal Standard	266714	1.8	1.79	-0.01	M-H	1	250.05	250.05	0.176	True	N/A	N/A	N/A	Method	N/A	N/A			Pass	Pass	Pass	N/A	Fail	100	3 of 3	N/A	N/A
7	Processed	190801-3-007	Unknown		False	A0736									NotFound		SCNBimane	N/F	N/F	N/A	N/A	Target Compound	N/F	1.8	N/F		N/A	N/F	248.05	N/F	N/F	True	N/F	1	1016047	Method	N/A	N/A		PPB	Fail	N/A	N/A	N/A	N/A	N/A		N/A	N/A
7	Processed	190801-3-007	Unknown		False	A0736									Confirmed	C10[13]CH11N2[15]NO2S	SCNBimaneIS	1016047	1	1	N/A	Internal Standard	272147	1.8	1.79	-0.01	M-H	1	250.05	250.05	-0.0071	True	N/A	N/A	N/A	Method	N/A	N/A			Pass	Pass	Pass	N/A	Pass	100	3 of 3	N/A	N/A
8	Processed	190801-3-008	Unknown		False	A0836									NotFound		SCNBimane	N/F	N/F	N/A	N/A	Target Compound	N/F	1.8	N/F		N/A	N/F	248.05	N/F	N/F	True	N/F	1	743640	Method	N/A	N/A		PPB	Fail	N/A	N/A	N/A	N/A	N/A		N/A	N/A
8	Processed	190801-3-008	Unknown		False	A0836									Identified	C10[13]CH11N2[15]NO2S	SCNBimaneIS	743640	1	1	N/A	Internal Standard	196694	1.8	1.79	-0.01	M-H	1	250.05	250.05	0.6031	True	N/A	N/A	N/A	Method	N/A	N/A			Pass	Pass	Pass	N/A	Fail	100	3 of 3	N/A	N/A
9	Processed	190801-3-009	Unknown		False	A0936									NotFound		SCNBimane	N/F	N/F	N/A	N/A	Target Compound	N/F	1.8	N/F		N/A	N/F	248.05	N/F	N/F	True	N/F	1	678829	Method	N/A	N/A		PPB	Fail	N/A	N/A	N/A	N/A	N/A		N/A	N/A
9	Processed	190801-3-009	Unknown		False	A0936									Identified	C10[13]CH11N2[15]NO2S	SCNBimaneIS	678829	1	1	N/A	Internal Standard	172765	1.8	1.79	-0.01	M-H	1	250.05	250.05	0.298	True	N/A	N/A	N/A	Method	N/A	N/A			Pass	Pass	Pass	N/A	Fail	100	3 of 3	N/A	N/A
10	Processed	190801-3-010	Unknown		False	A1036									NotFound		SCNBimane	N/F	N/F	N/A	N/A	Target Compound	N/F	1.8	N/F		N/A	N/F	248.05	N/F	N/F	True	N/F	1	360533	Method	N/A	N/A		PPB	Fail	N/A	N/A	N/A	N/A	N/A		N/A	N/A
10	Processed	190801-3-010	Unknown		False	A1036									Identified	C10[13]CH11N2[15]NO2S	SCNBimaneIS	360533	1	1	N/A	Internal Standard	99898	1.8	1.78	-0.02	M-H	1	250.05	250.05	-0.0681	True	N/A	N/A	N/A	Method	N/A	N/A			Pass	Pass	Pass	N/A	Fail	66.5791	2 of 3	N/A	N/A
11	Processed	190801-3-011	Unknown		False	B0136									Confirmed	C11H11N3O2S	SCNBimane	741531	204.683	N/A	N/A	Target Compound	222335	1.8	1.79	-0.01	M-H	204.683	248.05	248.05	-0.0343	True	7.295	1	101649	Method	N/A	N/A		PPB	Pass	Pass	Pass	N/A	Pass	95.2832	3 of 3	N/A	N/A
11	Processed	190801-3-011	Unknown		False	B0136									Identified	C10[13]CH11N2[15]NO2S	SCNBimaneIS	101649	1	1	N/A	Internal Standard	34101	1.8	1.78	-0.02	M-H	1	250.05	250.051	2.0677	True	N/A	N/A	N/A	Method	N/A	N/A			Pass	Pass	Pass	N/A	Fail	100	2 of 2	N/A	N/A
12	Processed	190801-3-012	Unknown		False	B0236									Confirmed	C11H11N3O2S	SCNBimane	1029959	326.74	N/A	N/A	Target Compound	296785	1.8	1.79	-0.01	M-H	326.74	248.05	248.05	0.0272	True	11.658	1	88346	Method	N/A	N/A		PPB	Pass	Pass	Pass	N/A	Pass	92.4937	3 of 4	N/A	N/A
12	Processed	190801-3-012	Unknown		False	B0236									Identified	C10[13]CH11N2[15]NO2S	SCNBimaneIS	88346	1	1	N/A	Internal Standard	28841	1.8	1.79	-0.01	M-H	1	250.05	250.05	0.237	True	N/A	N/A	N/A	Method	N/A	N/A			Pass	Pass	Fail	N/A	Fail	100	1 of 1	N/A	N/A
13	Processed	190801-3-013	Unknown		False	B0336									Confirmed	C11H11N3O2S	SCNBimane	15715914	217.147	N/A	N/A	Target Compound	4286979	1.8	1.79	-0.01	M-H	217.147	248.05	248.05	0.3348	True	7.741	1	2030323	Method	N/A	N/A		PPB	Pass	Pass	Pass	N/A	Pass	100	4 of 5	N/A	N/A
13	Processed	190801-3-013	Unknown		False	B0336									Confirmed	C10[13]CH11N2[15]NO2S	SCNBimaneIS	2030323	1	1	N/A	Internal Standard	545477	1.8	1.79	-0.01	M-H	1	250.05	250.05	0.5421	True	N/A	N/A	N/A	Method	N/A	N/A			Pass	Pass	Pass	N/A	Pass	91.7757	3 of 5	N/A	N/A
14	Processed	190801-3-014	Unknown		False	C0136									Identified	C11H11N3O2S	SCNBimane	8582	0.728	N/A	N/A	Target Compound	4794	1.8	1.79	-0.01	M-H	0.728	248.05	248.05	0.5809	True	0.004	1	2106479	Method	N/A	N/A		PPB	Pass	Pass	Fail	N/A	Fail	100	1 of 1	N/A	N/A
14	Processed	190801-3-014	Unknown		False	C0136									Confirmed	C10[13]CH11N2[15]NO2S	SCNBimaneIS	2106479	1	1	N/A	Internal Standard	545846	1.8	1.79	-0.01	M-H	1	250.05	250.05	0.298	True	N/A	N/A	N/A	Method	N/A	N/A			Pass	Pass	Pass	N/A	Pass	92.0273	3 of 5	N/A	N/A
15	Processed	190801-3-015	Unknown		False	C0236									Identified	C11H11N3O2S	SCNBimane	6333	0.716	N/A	N/A	Target Compound	4120	1.8	1.82	0.02	M-H	0.716	248.05	248.05	-0.7725	True	0.004	1	1733833	Method	N/A	N/A		PPB	Pass	Pass	Fail	N/A	Fail	100	1 of 1	N/A	N/A
15	Processed	190801-3-015	Unknown		False	C0236									Confirmed	C10[13]CH11N2[15]NO2S	SCNBimaneIS	1733833	1	1	N/A	Internal Standard	439858	1.8	1.79	-0.01	M-H	1	250.05	250.05	0.176	True	N/A	N/A	N/A	Method	N/A	N/A			Pass	Pass	Pass	N/A	Pass	98.8	3 of 4	N/A	N/A
16	Processed	190801-3-016	Unknown		False	C0336									NotFound		SCNBimane	N/F	N/F	N/A	N/A	Target Compound	N/F	1.8	N/F		N/A	N/F	248.05	N/F	N/F	True	N/F	1	1629341	Method	N/A	N/A		PPB	Fail	N/A	N/A	N/A	N/A	N/A		N/A	N/A
16	Processed	190801-3-016	Unknown		False	C0336									Confirmed	C10[13]CH11N2[15]NO2S	SCNBimaneIS	1629341	1	1	N/A	Internal Standard	426970	1.8	1.8	0.00	M-H	1	250.05	250.05	0.7862	True	N/A	N/A	N/A	Method	N/A	N/A			Pass	Pass	Pass	N/A	Pass	100	3 of 3	N/A	N/A
17	Processed	190801-3-017	Unknown		False	D0136									Confirmed	C11H11N3O2S	SCNBimane	14135430	227.104	N/A	N/A	Target Compound	3833110	1.8	1.8	0.00	M-H	227.104	248.05	248.05	0.7654	True	8.097	1	1745867	Method	N/A	N/A		PPB	Pass	Pass	Pass	N/A	Pass	100	5 of 5	N/A	N/A
17	Processed	190801-3-017	Unknown		False	D0136									Identified	C10[13]CH11N2[15]NO2S	SCNBimaneIS	1745867	1	1	N/A	Internal Standard	468933	1.8	1.8	0.00	M-H	1	250.05	250.051	2.7389	True	N/A	N/A	N/A	Method	N/A	N/A			Pass	Pass	Pass	N/A	Fail	100	4 of 4	N/A	N/A
18	Processed	190801-3-018	Unknown		False	D0236									Confirmed	C11H11N3O2S	SCNBimane	13643007	247.574	N/A	N/A	Target Compound	3677302	1.8	1.8	0.00	M-H	247.574	248.05	248.05	0.3348	True	8.828	1	1545374	Method	N/A	N/A		PPB	Pass	Pass	Pass	N/A	Pass	100	6 of 6	N/A	N/A
18	Processed	190801-3-018	Unknown		False	D0236									Confirmed	C10[13]CH11N2[15]NO2S	SCNBimaneIS	1545374	1	1	N/A	Internal Standard	397727	1.8	1.8	0.00	M-H	1	250.05	250.05	0.6642	True	N/A	N/A	N/A	Method	N/A	N/A			Pass	Pass	Pass	N/A	Pass	100	3 of 3	N/A	N/A
19	Processed	190801-3-019	Unknown		False	D0336									Confirmed	C11H11N3O2S	SCNBimane	11819601	246.994	N/A	N/A	Target Compound	3216341	1.8	1.81	0.01	M-H	246.994	248.05	248.05	0.5194	True	8.808	1	1341987	Method	N/A	N/A		PPB	Pass	Pass	Pass	N/A	Pass	100	6 of 6	N/A	N/A
19	Processed	190801-3-019	Unknown		False	D0336									Confirmed	C10[13]CH11N2[15]NO2S	SCNBimaneIS	1341987	1	1	N/A	Internal Standard	348722	1.8	1.81	0.01	M-H	1	250.05	250.051	2.2508	True	N/A	N/A	N/A	Method	N/A	N/A			Pass	Pass	Pass	N/A	Pass	100	3 of 3	N/A	N/A
20	Processed	190801-3-020	Unknown		False	E0136									NotFound		SCNBimane	N/F	N/F	N/A	N/A	Target Compound	N/F	1.8	N/F		N/A	N/F	248.05	N/F	N/F	True	N/F	1	1163151	Method	N/A	N/A		PPB	Fail	N/A	N/A	N/A	N/A	N/A		N/A	N/A
20	Processed	190801-3-020	Unknown		False	E0136									Confirmed	C10[13]CH11N2[15]NO2S	SCNBimaneIS	1163151	1	1	N/A	Internal Standard	308843	1.8	1.8	0.00	M-H	1	250.05	250.051	1.1523	True	N/A	N/A	N/A	Method	N/A	N/A			Pass	Pass	Pass	N/A	Pass	100	3 of 3	N/A	N/A
21	Processed	190801-3-021	Unknown		False	E0236									NotFound		SCNBimane	N/F	N/F	N/A	N/A	Target Compound	N/F	1.8	N/F		N/A	N/F	248.05	N/F	N/F	True	N/F	1	1051664	Method	N/A	N/A		PPB	Fail	N/A	N/A	N/A	N/A	N/A		N/A	N/A
21	Processed	190801-3-021	Unknown		False	E0236									Confirmed	C10[13]CH11N2[15]NO2S	SCNBimaneIS	1051664	1	1	N/A	Internal Standard	267484	1.8	1.8	0.00	M-H	1	250.05	250.05	0.7252	True	N/A	N/A	N/A	Method	N/A	N/A			Pass	Pass	Pass	N/A	Pass	100	3 of 3	N/A	N/A
22	Processed	190801-3-022	Unknown		False	E0336									NotFound		SCNBimane	N/F	N/F	N/A	N/A	Target Compound	N/F	1.8	N/F		N/A	N/F	248.05	N/F	N/F	True	N/F	1	734562	Method	N/A	N/A		PPB	Fail	N/A	N/A	N/A	N/A	N/A		N/A	N/A
22	Processed	190801-3-022	Unknown		False	E0336									Identified	C10[13]CH11N2[15]NO2S	SCNBimaneIS	734562	1	1	N/A	Internal Standard	203703	1.8	1.8	0.00	M-H	1	250.05	250.05	0.7252	True	N/A	N/A	N/A	Method	N/A	N/A			Pass	Pass	Pass	N/A	Fail	66.6895	2 of 3	N/A	N/A
23	Processed	190801-3-023	Unknown		False	25 ppb STD									Identified	C11H11N3O2S	SCNBimane	283040	26.929	N/A	N/A	Target Compound	81579	1.8	1.8	0.00	M-H	26.929	248.05	248.05	0.4578	True	0.941	1	300883	Method	N/A	N/A		PPB	Pass	Pass	Fail	N/A	Pass	57.6302	2 of 3	N/A	N/A
23	Processed	190801-3-023	Unknown		False	25 ppb STD									Identified	C10[13]CH11N2[15]NO2S	SCNBimaneIS	300883	1	1	N/A	Internal Standard	80792	1.8	1.8	0.00	M-H	1	250.05	250.051	1.7626	True	N/A	N/A	N/A	Method	N/A	N/A			Pass	Pass	Pass	N/A	Fail	66.5906	2 of 3	N/A	N/A
24	Processed	190801-3-024	Unknown		False	Blank									NotFound		SCNBimane	N/F	N/F	N/A	N/A	Target Compound	N/F	1.8	N/F		N/A	N/F	248.05	N/F	N/F	True	N/F	1	221151	Method	N/A	N/A		PPB	Fail	N/A	N/A	N/A	N/A	N/A		N/A	N/A
24	Processed	190801-3-024	Unknown		False	Blank									Identified	C10[13]CH11N2[15]NO2S	SCNBimaneIS	221151	1	1	N/A	Internal Standard	61609	1.8	1.79	-0.01	M-H	1	250.05	250.05	0.7862	True	N/A	N/A	N/A	Method	N/A	N/A			Pass	Pass	Pass	N/A	Fail	66.9344	2 of 3	N/A	N/A
25	Processed	190801-3-025	Unknown		False	A0148									Identified	C11H11N3O2S	SCNBimane	14570	0.793	N/A	N/A	Target Compound	8406	1.8	1.82	0.02	M-H	0.793	248.05	248.05	-0.2188	True	0.006	1	2276546	Method	N/A	N/A		PPB	Pass	Pass	Fail	N/A	Fail	100	1 of 1	N/A	N/A
25	Processed	190801-3-025	Unknown		False	A0148									Confirmed	C10[13]CH11N2[15]NO2S	SCNBimaneIS	2276546	1	1	N/A	Internal Standard	603990	1.8	1.8	0.00	M-H	1	250.05	250.05	0.5421	True	N/A	N/A	N/A	Method	N/A	N/A			Pass	Pass	Pass	N/A	Pass	96.4325	4 of 5	N/A	N/A
26	Processed	190801-3-026	Unknown		False	A0248									Identified	C11H11N3O2S	SCNBimane	11299	0.753	N/A	N/A	Target Compound	6480	1.8	1.79	-0.01	M-H	0.753	248.05	248.05	0.3348	True	0.005	1	2263758	Method	N/A	N/A		PPB	Pass	Pass	Fail	N/A	Fail	100	1 of 1	N/A	N/A
26	Processed	190801-3-026	Unknown		False	A0248									Confirmed	C10[13]CH11N2[15]NO2S	SCNBimaneIS	2263758	1	1	N/A	Internal Standard	577055	1.8	1.8	0.00	M-H	1	250.05	250.05	0.4811	True	N/A	N/A	N/A	Method	N/A	N/A			Pass	Pass	Pass	N/A	Pass	92.2129	3 of 5	N/A	N/A
27	Processed	190801-3-027	Unknown		False	A0348									NotFound		SCNBimane	N/F	N/F	N/A	N/A	Target Compound	N/F	1.8	N/F		N/A	N/F	248.05	N/F	N/F	True	N/F	1	2213721	Method	N/A	N/A		PPB	Fail	N/A	N/A	N/A	N/A	N/A		N/A	N/A
27	Processed	190801-3-027	Unknown		False	A0348									Confirmed	C10[13]CH11N2[15]NO2S	SCNBimaneIS	2213721	1	1	N/A	Internal Standard	559109	1.8	1.8	0.00	M-H	1	250.05	250.05	0.298	True	N/A	N/A	N/A	Method	N/A	N/A			Pass	Pass	Pass	N/A	Pass	92.1888	3 of 5	N/A	N/A
28	Processed	190801-3-028	Unknown		False	A0448									NotFound		SCNBimane	N/F	N/F	N/A	N/A	Target Compound	N/F	1.8	N/F		N/A	N/F	248.05	N/F	N/F	True	N/F	1	2174088	Method	N/A	N/A		PPB	Fail	N/A	N/A	N/A	N/A	N/A		N/A	N/A
28	Processed	190801-3-028	Unknown		False	A0448									Confirmed	C10[13]CH11N2[15]NO2S	SCNBimaneIS	2174088	1	1	N/A	Internal Standard	590414	1.8	1.8	0.00	M-H	1	250.05	250.05	0.4201	True	N/A	N/A	N/A	Method	N/A	N/A			Pass	Pass	Pass	N/A	Pass	98.7646	3 of 4	N/A	N/A
29	Processed	190801-3-029	Unknown		False	A0548									NotFound		SCNBimane	N/F	N/F	N/A	N/A	Target Compound	N/F	1.8	N/F		N/A	N/F	248.05	N/F	N/F	True	N/F	1	801420	Method	N/A	N/A		PPB	Fail	N/A	N/A	N/A	N/A	N/A		N/A	N/A
29	Processed	190801-3-029	Unknown		False	A0548									Confirmed	C10[13]CH11N2[15]NO2S	SCNBimaneIS	801420	1	1	N/A	Internal Standard	209499	1.8	1.81	0.01	M-H	1	250.05	250.05	0.176	True	N/A	N/A	N/A	Method	N/A	N/A			Pass	Pass	Pass	N/A	Pass	100	3 of 3	N/A	N/A
30	Processed	190801-3-030	Unknown		False	A0648									NotFound		SCNBimane	N/F	N/F	N/A	N/A	Target Compound	N/F	1.8	N/F		N/A	N/F	248.05	N/F	N/F	True	N/F	1	1915880	Method	N/A	N/A		PPB	Fail	N/A	N/A	N/A	N/A	N/A		N/A	N/A
30	Processed	190801-3-030	Unknown		False	A0648									Confirmed	C10[13]CH11N2[15]NO2S	SCNBimaneIS	1915880	1	1	N/A	Internal Standard	510063	1.8	1.8	0.00	M-H	1	250.05	250.05	0.237	True	N/A	N/A	N/A	Method	N/A	N/A			Pass	Pass	Pass	N/A	Pass	99.0021	3 of 4	N/A	N/A
31	Processed	190801-3-031	Unknown		False	A0748									NotFound		SCNBimane	N/F	N/F	N/A	N/A	Target Compound	N/F	1.8	N/F		N/A	N/F	248.05	N/F	N/F	True	N/F	1	1564387	Method	N/A	N/A		PPB	Fail	N/A	N/A	N/A	N/A	N/A		N/A	N/A
31	Processed	190801-3-031	Unknown		False	A0748									Confirmed	C10[13]CH11N2[15]NO2S	SCNBimaneIS	1564387	1	1	N/A	Internal Standard	422144	1.8	1.8	0.00	M-H	1	250.05	250.05	0.359	True	N/A	N/A	N/A	Method	N/A	N/A			Pass	Pass	Pass	N/A	Pass	100	3 of 3	N/A	N/A
32	Processed	190801-3-032	Unknown		False	A0848									NotFound		SCNBimane	N/F	N/F	N/A	N/A	Target Compound	N/F	1.8	N/F		N/A	N/F	248.05	N/F	N/F	True	N/F	1	1328704	Method	N/A	N/A		PPB	Fail	N/A	N/A	N/A	N/A	N/A		N/A	N/A
32	Processed	190801-3-032	Unknown		False	A0848									Confirmed	C10[13]CH11N2[15]NO2S	SCNBimaneIS	1328704	1	1	N/A	Internal Standard	336051	1.8	1.8	0.00	M-H	1	250.05	250.05	0.298	True	N/A	N/A	N/A	Method	N/A	N/A			Pass	Pass	Pass	N/A	Pass	100	3 of 3	N/A	N/A
33	Processed	190801-3-033	Unknown		False	A0948									NotFound		SCNBimane	N/F	N/F	N/A	N/A	Target Compound	N/F	1.8	N/F		N/A	N/F	248.05	N/F	N/F	True	N/F	1	983599	Method	N/A	N/A		PPB	Fail	N/A	N/A	N/A	N/A	N/A		N/A	N/A
33	Processed	190801-3-033	Unknown		False	A0948									Confirmed	C10[13]CH11N2[15]NO2S	SCNBimaneIS	983599	1	1	N/A	Internal Standard	276023	1.8	1.8	0.00	M-H	1	250.05	250.05	0.4201	True	N/A	N/A	N/A	Method	N/A	N/A			Pass	Pass	Pass	N/A	Pass	100	3 of 3	N/A	N/A
34	Processed	190801-3-034	Unknown		False	A1048									NotFound		SCNBimane	N/F	N/F	N/A	N/A	Target Compound	N/F	1.8	N/F		N/A	N/F	248.05	N/F	N/F	True	N/F	1	744579	Method	N/A	N/A		PPB	Fail	N/A	N/A	N/A	N/A	N/A		N/A	N/A
34	Processed	190801-3-034	Unknown		False	A1048									Confirmed	C10[13]CH11N2[15]NO2S	SCNBimaneIS	744579	1	1	N/A	Internal Standard	211234	1.8	1.81	0.01	M-H	1	250.05	250.05	0.6642	True	N/A	N/A	N/A	Method	N/A	N/A			Pass	Pass	Pass	N/A	Pass	66.654	2 of 3	N/A	N/A
35	Processed	190801-3-035	Unknown		False	B0148									Confirmed	C11H11N3O2S	SCNBimane	1484703	202.605	N/A	N/A	Target Compound	413864	1.8	1.8	0.00	M-H	202.605	248.05	248.05	0.2733	True	7.221	1	205617	Method	N/A	N/A		PPB	Pass	Pass	Pass	N/A	Pass	95.2679	4 of 4	N/A	N/A
35	Processed	190801-3-035	Unknown		False	B0148									Identified	C10[13]CH11N2[15]NO2S	SCNBimaneIS	205617	1	1	N/A	Internal Standard	63420	1.8	1.8	0.00	M-H	1	250.05	250.051	1.0913	True	N/A	N/A	N/A	Method	N/A	N/A			Pass	Pass	Fail	N/A	Fail	42.5502	1 of 2	N/A	N/A
36	Processed	190801-3-036	Unknown		False	B0248									Confirmed	C11H11N3O2S	SCNBimane	1011269	195.444	N/A	N/A	Target Compound	293730	1.8	1.8	0.00	M-H	195.444	248.05	248.05	0.4578	True	6.965	1	145198	Method	N/A	N/A		PPB	Pass	Pass	Pass	N/A	Pass	91.401	3 of 4	N/A	N/A
36	Processed	190801-3-036	Unknown		False	B0248									Identified	C10[13]CH11N2[15]NO2S	SCNBimaneIS	145198	1	1	N/A	Internal Standard	40975	1.8	1.8	0.00	M-H	1	250.05	250.05	0.7252	True	N/A	N/A	N/A	Method	N/A	N/A			Pass	Pass	Fail	N/A	Fail	40.058	1 of 2	N/A	N/A
37	Processed	190801-3-037	Unknown		False	B0348									Confirmed	C11H11N3O2S	SCNBimane	19532278	278.561	N/A	N/A	Target Compound	5352965	1.8	1.8	0.00	M-H	278.561	248.05	248.05	0.0888	True	9.936	1	1965812	Method	N/A	N/A		PPB	Pass	Pass	Pass	N/A	Pass	100	5 of 5	N/A	N/A
37	Processed	190801-3-037	Unknown		False	B0348									Confirmed	C10[13]CH11N2[15]NO2S	SCNBimaneIS	1965812	1	1	N/A	Internal Standard	533637	1.8	1.8	0.00	M-H	1	250.05	250.05	0.298	True	N/A	N/A	N/A	Method	N/A	N/A			Pass	Pass	Pass	N/A	Pass	98.2156	3 of 4	N/A	N/A
38	Processed	190801-3-038	Unknown		False	C0148									Identified	C11H11N3O2S	SCNBimane	10753	0.755	N/A	N/A	Target Compound	3843	1.8	1.81	0.01	M-H	0.755	248.05	248.05	0.3348	True	0.005	1	2126434	Method	N/A	N/A		PPB	Pass	Pass	Fail	N/A	Pass	100	1 of 1	N/A	N/A
38	Processed	190801-3-038	Unknown		False	C0148									Confirmed	C10[13]CH11N2[15]NO2S	SCNBimaneIS	2126434	1	1	N/A	Internal Standard	560031	1.8	1.8	0.00	M-H	1	250.05	250.05	0.298	True	N/A	N/A	N/A	Method	N/A	N/A			Pass	Pass	Pass	N/A	Pass	98.7762	3 of 4	N/A	N/A
39	Processed	190801-3-039	Unknown		False	C0248									NotFound		SCNBimane	N/F	N/F	N/A	N/A	Target Compound	N/F	1.8	N/F		N/A	N/F	248.05	N/F	N/F	True	N/F	1	2203920	Method	N/A	N/A		PPB	Fail	N/A	N/A	N/A	N/A	N/A		N/A	N/A
39	Processed	190801-3-039	Unknown		False	C0248									Confirmed	C10[13]CH11N2[15]NO2S	SCNBimaneIS	2203920	1	1	N/A	Internal Standard	560920	1.8	1.8	0.00	M-H	1	250.05	250.05	0.4811	True	N/A	N/A	N/A	Method	N/A	N/A			Pass	Pass	Pass	N/A	Pass	98.8886	3 of 4	N/A	N/A
40	Processed	190801-3-040	Unknown		False	C0348									NotFound		SCNBimane	N/F	N/F	N/A	N/A	Target Compound	N/F	1.8	N/F		N/A	N/F	248.05	N/F	N/F	True	N/F	1	2209942	Method	N/A	N/A		PPB	Fail	N/A	N/A	N/A	N/A	N/A		N/A	N/A
40	Processed	190801-3-040	Unknown		False	C0348									Confirmed	C10[13]CH11N2[15]NO2S	SCNBimaneIS	2209942	1	1	N/A	Internal Standard	574647	1.8	1.81	0.01	M-H	1	250.05	250.05	0.4811	True	N/A	N/A	N/A	Method	N/A	N/A			Pass	Pass	Pass	N/A	Pass	92.1845	3 of 5	N/A	N/A
41	Processed	190801-3-041	Unknown		False	D0148									Confirmed	C11H11N3O2S	SCNBimane	16734900	278.579	N/A	N/A	Target Compound	4508543	1.8	1.81	0.01	M-H	278.579	248.05	248.05	-0.0958	True	9.937	1	1684162	Method	N/A	N/A		PPB	Pass	Pass	Pass	N/A	Pass	100	5 of 5	N/A	N/A
41	Processed	190801-3-041	Unknown		False	D0148									Confirmed	C10[13]CH11N2[15]NO2S	SCNBimaneIS	1684162	1	1	N/A	Internal Standard	440694	1.8	1.81	0.01	M-H	1	250.05	250.051	1.5185	True	N/A	N/A	N/A	Method	N/A	N/A			Pass	Pass	Pass	N/A	Pass	100	3 of 3	N/A	N/A
42	Processed	190801-3-042	Unknown		False	D0248									Confirmed	C11H11N3O2S	SCNBimane	16600627	265.678	N/A	N/A	Target Compound	4501984	1.8	1.81	0.01	M-H	265.678	248.05	248.05	0.2118	True	9.475	1	1751959	Method	N/A	N/A		PPB	Pass	Pass	Pass	N/A	Pass	100	5 of 5	N/A	N/A
42	Processed	190801-3-042	Unknown		False	D0248									Confirmed	C10[13]CH11N2[15]NO2S	SCNBimaneIS	1751959	1	1	N/A	Internal Standard	459363	1.8	1.8	0.00	M-H	1	250.05	250.05	0.7252	True	N/A	N/A	N/A	Method	N/A	N/A			Pass	Pass	Pass	N/A	Pass	100	3 of 3	N/A	N/A
43	Processed	190801-3-043	Unknown		False	D0348									Confirmed	C11H11N3O2S	SCNBimane	14365039	253.06	N/A	N/A	Target Compound	3927628	1.8	1.81	0.01	M-H	253.06	248.05	248.05	-0.0343	True	9.024	1	1591801	Method	N/A	N/A		PPB	Pass	Pass	Pass	N/A	Pass	100	5 of 5	N/A	N/A
43	Processed	190801-3-043	Unknown		False	D0348									Confirmed	C10[13]CH11N2[15]NO2S	SCNBimaneIS	1591801	1	1	N/A	Internal Standard	426172	1.8	1.81	0.01	M-H	1	250.05	250.051	1.3964	True	N/A	N/A	N/A	Method	N/A	N/A			Pass	Pass	Pass	N/A	Pass	100	3 of 3	N/A	N/A
44	Processed	190801-3-044	Unknown		False	E0148									NotFound		SCNBimane	N/F	N/F	N/A	N/A	Target Compound	N/F	1.8	N/F		N/A	N/F	248.05	N/F	N/F	True	N/F	1	1372702	Method	N/A	N/A		PPB	Fail	N/A	N/A	N/A	N/A	N/A		N/A	N/A
44	Processed	190801-3-044	Unknown		False	E0148									Identified	C10[13]CH11N2[15]NO2S	SCNBimaneIS	1372702	1	1	N/A	Internal Standard	355961	1.8	1.8	0.00	M-H	1	250.05	250.05	0.4201	True	N/A	N/A	N/A	Method	N/A	N/A			Pass	Pass	Pass	N/A	Fail	100	3 of 3	N/A	N/A
45	Processed	190801-3-045	Unknown		False	E0248									NotFound		SCNBimane	N/F	N/F	N/A	N/A	Target Compound	N/F	1.8	N/F		N/A	N/F	248.05	N/F	N/F	True	N/F	1	1030622	Method	N/A	N/A		PPB	Fail	N/A	N/A	N/A	N/A	N/A		N/A	N/A
45	Processed	190801-3-045	Unknown		False	E0248									Confirmed	C10[13]CH11N2[15]NO2S	SCNBimaneIS	1030622	1	1	N/A	Internal Standard	264898	1.8	1.81	0.01	M-H	1	250.05	250.05	0.359	True	N/A	N/A	N/A	Method	N/A	N/A			Pass	Pass	Pass	N/A	Pass	100	3 of 3	N/A	N/A
46	Processed	190801-3-046	Unknown		False	E0348									NotFound		SCNBimane	N/F	N/F	N/A	N/A	Target Compound	N/F	1.8	N/F		N/A	N/F	248.05	N/F	N/F	True	N/F	1	698810	Method	N/A	N/A		PPB	Fail	N/A	N/A	N/A	N/A	N/A		N/A	N/A
46	Processed	190801-3-046	Unknown		False	E0348									Identified	C10[13]CH11N2[15]NO2S	SCNBimaneIS	698810	1	1	N/A	Internal Standard	181362	1.8	1.81	0.01	M-H	1	250.05	250.05	0.298	True	N/A	N/A	N/A	Method	N/A	N/A			Pass	Pass	Pass	N/A	Fail	100	3 of 3	N/A	N/A
47	Processed	190801-3-047	Unknown		False	E48									NotFound		SCNBimane	N/F	N/F	N/A	N/A	Target Compound	N/F	1.8	N/F		N/A	N/F	248.05	N/F	N/F	True	N/F	1	197386	Method	N/A	N/A		PPB	Fail	N/A	N/A	N/A	N/A	N/A		N/A	N/A
47	Processed	190801-3-047	Unknown		False	E48									Identified	C10[13]CH11N2[15]NO2S	SCNBimaneIS	197386	1	1	N/A	Internal Standard	61282	1.8	1.8	0.00	M-H	1	250.05	250.051	1.0303	True	N/A	N/A	N/A	Method	N/A	N/A			Pass	Pass	Pass	N/A	Fail	100	2 of 2	N/A	N/A
48	Processed	190801-3-048	Unknown		False	50 ppb STD									Confirmed	C11H11N3O2S	SCNBimane	482372	64.124	N/A	N/A	Target Compound	135474	1.8	1.8	0.00	M-H	64.124	248.05	248.05	0.5194	True	2.27	1	212466	Method	N/A	N/A		PPB	Pass	Pass	Pass	N/A	Pass	82.8661	2 of 4	N/A	N/A
48	Processed	190801-3-048	Unknown		False	50 ppb STD									Identified	C10[13]CH11N2[15]NO2S	SCNBimaneIS	212466	1	1	N/A	Internal Standard	59876	1.8	1.8	0.00	M-H	1	250.05	250.051	1.5795	True	N/A	N/A	N/A	Method	N/A	N/A			Pass	Pass	Pass	N/A	Fail	66.1264	2 of 3	N/A	N/A
49	Processed	190801-3-049	Unknown		False	A0172									Identified	C11H11N3O2S	SCNBimane	20881	0.882	N/A	N/A	Target Compound	11077	1.8	1.81	0.01	M-H	0.882	248.05	248.05	-0.0343	True	0.01	1	2174922	Method	N/A	N/A		PPB	Pass	Pass	Fail	N/A	Fail	100	1 of 1	N/A	N/A
49	Processed	190801-3-049	Unknown		False	A0172									Confirmed	C10[13]CH11N2[15]NO2S	SCNBimaneIS	2174922	1	1	N/A	Internal Standard	574733	1.8	1.81	0.01	M-H	1	250.05	250.05	0.176	True	N/A	N/A	N/A	Method	N/A	N/A			Pass	Pass	Pass	N/A	Pass	100	4 of 4	N/A	N/A
50	Processed	190801-3-050	Unknown		False	A0272									Identified	C11H11N3O2S	SCNBimane	5993	0.693	N/A	N/A	Target Compound	3904	1.8	1.81	0.01	M-H	0.693	248.05	248.05	1.196	True	0.003	1	2119314	Method	N/A	N/A		PPB	Pass	Pass	Fail	N/A	Fail	100	1 of 1	N/A	N/A
50	Processed	190801-3-050	Unknown		False	A0272									Confirmed	C10[13]CH11N2[15]NO2S	SCNBimaneIS	2119314	1	1	N/A	Internal Standard	565121	1.8	1.8	0.00	M-H	1	250.05	250.05	0.237	True	N/A	N/A	N/A	Method	N/A	N/A			Pass	Pass	Pass	N/A	Pass	98.6809	3 of 4	N/A	N/A
51	Processed	190801-3-051	Unknown		False	A0372									NotFound		SCNBimane	N/F	N/F	N/A	N/A	Target Compound	N/F	1.8	N/F		N/A	N/F	248.05	N/F	N/F	True	N/F	1	1844445	Method	N/A	N/A		PPB	Fail	N/A	N/A	N/A	N/A	N/A		N/A	N/A
51	Processed	190801-3-051	Unknown		False	A0372									Confirmed	C10[13]CH11N2[15]NO2S	SCNBimaneIS	1844445	1	1	N/A	Internal Standard	501897	1.8	1.8	0.00	M-H	1	250.05	250.05	0.237	True	N/A	N/A	N/A	Method	N/A	N/A			Pass	Pass	Pass	N/A	Pass	98.8363	3 of 4	N/A	N/A
52	Processed	190801-3-052	Unknown		False	A0472									NotFound		SCNBimane	N/F	N/F	N/A	N/A	Target Compound	N/F	1.8	N/F		N/A	N/F	248.05	N/F	N/F	True	N/F	1	1962118	Method	N/A	N/A		PPB	Fail	N/A	N/A	N/A	N/A	N/A		N/A	N/A
52	Processed	190801-3-052	Unknown		False	A0472									Confirmed	C10[13]CH11N2[15]NO2S	SCNBimaneIS	1962118	1	1	N/A	Internal Standard	509826	1.8	1.81	0.01	M-H	1	250.05	250.05	0.298	True	N/A	N/A	N/A	Method	N/A	N/A			Pass	Pass	Pass	N/A	Pass	98.6498	3 of 4	N/A	N/A
53	Processed	190801-3-053	Unknown		False	A0572									NotFound		SCNBimane	N/F	N/F	N/A	N/A	Target Compound	N/F	1.8	N/F		N/A	N/F	248.05	N/F	N/F	True	N/F	1	1800351	Method	N/A	N/A		PPB	Fail	N/A	N/A	N/A	N/A	N/A		N/A	N/A
53	Processed	190801-3-053	Unknown		False	A0572									Confirmed	C10[13]CH11N2[15]NO2S	SCNBimaneIS	1800351	1	1	N/A	Internal Standard	473757	1.8	1.81	0.01	M-H	1	250.05	250.05	-0.1902	True	N/A	N/A	N/A	Method	N/A	N/A			Pass	Pass	Pass	N/A	Pass	98.6685	3 of 4	N/A	N/A
54	Processed	190801-3-054	Unknown		False	B0172									Confirmed	C11H11N3O2S	SCNBimane	13277343	218.014	N/A	N/A	Target Compound	3737774	1.8	1.8	0.00	M-H	218.014	248.05	248.05	0.0272	True	7.772	1	1708448	Method	N/A	N/A		PPB	Pass	Pass	Pass	N/A	Pass	100	5 of 5	N/A	N/A
54	Processed	190801-3-054	Unknown		False	B0172									Confirmed	C10[13]CH11N2[15]NO2S	SCNBimaneIS	1708448	1	1	N/A	Internal Standard	468150	1.8	1.81	0.01	M-H	1	250.05	250.051	1.2134	True	N/A	N/A	N/A	Method	N/A	N/A			Pass	Pass	Pass	N/A	Pass	100	3 of 3	N/A	N/A
55	Processed	190801-3-055	Unknown		False	B0272									Confirmed	C11H11N3O2S	SCNBimane	8132069	143.343	N/A	N/A	Target Compound	2253400	1.8	1.8	0.00	M-H	143.343	248.05	248.05	0.2118	True	5.102	1	1593824	Method	N/A	N/A		PPB	Pass	Pass	Pass	N/A	Pass	92.1039	4 of 5	N/A	N/A
55	Processed	190801-3-055	Unknown		False	B0272									Confirmed	C10[13]CH11N2[15]NO2S	SCNBimaneIS	1593824	1	1	N/A	Internal Standard	432468	1.8	1.81	0.01	M-H	1	250.05	250.051	1.8846	True	N/A	N/A	N/A	Method	N/A	N/A			Pass	Pass	Pass	N/A	Pass	100	3 of 3	N/A	N/A
56	Processed	190801-3-056	Unknown		False	B0372									Confirmed	C11H11N3O2S	SCNBimane	7871210	229.022	N/A	N/A	Target Compound	2132134	1.8	1.81	0.01	M-H	229.022	248.05	248.05	0.2118	True	8.165	1	964008	Method	N/A	N/A		PPB	Pass	Pass	Pass	N/A	Pass	100	5 of 5	N/A	N/A
56	Processed	190801-3-056	Unknown		False	B0372									Identified	C10[13]CH11N2[15]NO2S	SCNBimaneIS	964008	1	1	N/A	Internal Standard	260699	1.8	1.81	0.01	M-H	1	250.05	250.051	2.0677	True	N/A	N/A	N/A	Method	N/A	N/A			Pass	Pass	Pass	N/A	Fail	100	3 of 3	N/A	N/A
57	Processed	190801-3-057	Unknown		False	C0172									NotFound		SCNBimane	N/F	N/F	N/A	N/A	Target Compound	N/F	1.8	N/F		N/A	N/F	248.05	N/F	N/F	True	N/F	1	787368	Method	N/A	N/A		PPB	Fail	N/A	N/A	N/A	N/A	N/A		N/A	N/A
57	Processed	190801-3-057	Unknown		False	C0172									Identified	C10[13]CH11N2[15]NO2S	SCNBimaneIS	787368	1	1	N/A	Internal Standard	209600	1.8	1.8	0.00	M-H	1	250.05	250.05	0.6031	True	N/A	N/A	N/A	Method	N/A	N/A			Pass	Pass	Pass	N/A	Fail	66.6035	2 of 3	N/A	N/A
58	Processed	190801-3-058	Unknown		False	C0272									NotFound		SCNBimane	N/F	N/F	N/A	N/A	Target Compound	N/F	1.8	N/F		N/A	N/F	248.05	N/F	N/F	True	N/F	1	476900	Method	N/A	N/A		PPB	Fail	N/A	N/A	N/A	N/A	N/A		N/A	N/A
58	Processed	190801-3-058	Unknown		False	C0272									Identified	C10[13]CH11N2[15]NO2S	SCNBimaneIS	476900	1	1	N/A	Internal Standard	137496	1.8	1.81	0.01	M-H	1	250.05	250.05	-0.0681	True	N/A	N/A	N/A	Method	N/A	N/A			Pass	Pass	Pass	N/A	Fail	66.3926	2 of 3	N/A	N/A
59	Processed	190801-3-059	Unknown		False	C0372									NotFound		SCNBimane	N/F	N/F	N/A	N/A	Target Compound	N/F	1.8	N/F		N/A	N/F	248.05	N/F	N/F	True	N/F	1	135865	Method	N/A	N/A		PPB	Fail	N/A	N/A	N/A	N/A	N/A		N/A	N/A
59	Processed	190801-3-059	Unknown		False	C0372									Identified	C10[13]CH11N2[15]NO2S	SCNBimaneIS	135865	1	1	N/A	Internal Standard	37729	1.8	1.81	0.01	M-H	1	250.05	250.05	0.7252	True	N/A	N/A	N/A	Method	N/A	N/A			Pass	Pass	Fail	N/A	Fail	37.4977	1 of 2	N/A	N/A
60	Processed	190801-3-060	Unknown		False	D0172									Confirmed	C11H11N3O2S	SCNBimane	1306384	533.68	N/A	N/A	Target Compound	362596	1.8	1.82	0.02	M-H	533.68	248.05	248.05	0.1503	True	19.056	1	68555	Method	N/A	N/A		PPB	Pass	Pass	Pass	N/A	Pass	94.9862	3 of 3	N/A	N/A
60	Processed	190801-3-060	Unknown		False	D0172									Identified	C10[13]CH11N2[15]NO2S	SCNBimaneIS	68555	1	1	N/A	Internal Standard	22317	1.8	1.81	0.01	M-H	1	250.05	250.05	0.9083	True	N/A	N/A	N/A	Method	N/A	N/A			Pass	Pass	Fail	N/A	Fail	100	1 of 1	N/A	N/A
61	Processed	190801-3-061	Unknown		False	D0272									Confirmed	C11H11N3O2S	SCNBimane	17099163	217.105	N/A	N/A	Target Compound	4859004	1.8	1.81	0.01	M-H	217.105	248.05	248.05	0.1503	True	7.739	1	2209455	Method	N/A	N/A		PPB	Pass	Pass	Pass	N/A	Pass	100	6 of 6	N/A	N/A
61	Processed	190801-3-061	Unknown		False	D0272									Confirmed	C10[13]CH11N2[15]NO2S	SCNBimaneIS	2209455	1	1	N/A	Internal Standard	585587	1.8	1.81	0.01	M-H	1	250.05	250.05	0.7862	True	N/A	N/A	N/A	Method	N/A	N/A			Pass	Pass	Pass	N/A	Pass	97.7362	3 of 4	N/A	N/A
62	Processed	190801-3-062	Unknown		False	D0372									Confirmed	C11H11N3O2S	SCNBimane	18217487	245.939	N/A	N/A	Target Compound	5022527	1.8	1.8	0.00	M-H	245.939	248.05	248.05	0.5809	True	8.77	1	2077290	Method	N/A	N/A		PPB	Pass	Pass	Pass	N/A	Pass	100	6 of 6	N/A	N/A
62	Processed	190801-3-062	Unknown		False	D0372									Confirmed	C10[13]CH11N2[15]NO2S	SCNBimaneIS	2077290	1	1	N/A	Internal Standard	528243	1.8	1.81	0.01	M-H	1	250.05	250.05	0.4811	True	N/A	N/A	N/A	Method	N/A	N/A			Pass	Pass	Pass	N/A	Pass	97.6972	3 of 4	N/A	N/A
63	Processed	190801-3-063	Unknown		False	E0172									NotFound		SCNBimane	N/F	N/F	N/A	N/A	Target Compound	N/F	1.8	N/F		N/A	N/F	248.05	N/F	N/F	True	N/F	1	2322292	Method	N/A	N/A		PPB	Fail	N/A	N/A	N/A	N/A	N/A		N/A	N/A
63	Processed	190801-3-063	Unknown		False	E0172									Confirmed	C10[13]CH11N2[15]NO2S	SCNBimaneIS	2322292	1	1	N/A	Internal Standard	583883	1.8	1.81	0.01	M-H	1	250.05	250.05	0.4811	True	N/A	N/A	N/A	Method	N/A	N/A			Pass	Pass	Pass	N/A	Pass	98.6827	3 of 4	N/A	N/A
64	Processed	190801-3-064	Unknown		False	E0272									NotFound		SCNBimane	N/F	N/F	N/A	N/A	Target Compound	N/F	1.8	N/F		N/A	N/F	248.05	N/F	N/F	True	N/F	1	2065328	Method	N/A	N/A		PPB	Fail	N/A	N/A	N/A	N/A	N/A		N/A	N/A
64	Processed	190801-3-064	Unknown		False	E0272									Confirmed	C10[13]CH11N2[15]NO2S	SCNBimaneIS	2065328	1	1	N/A	Internal Standard	544319	1.8	1.81	0.01	M-H	1	250.05	250.05	0.5421	True	N/A	N/A	N/A	Method	N/A	N/A			Pass	Pass	Pass	N/A	Pass	98.8884	3 of 4	N/A	N/A
65	Processed	190801-3-065	Unknown		False	E0372									NotFound		SCNBimane	N/F	N/F	N/A	N/A	Target Compound	N/F	1.8	N/F		N/A	N/F	248.05	N/F	N/F	True	N/F	1	1908368	Method	N/A	N/A		PPB	Fail	N/A	N/A	N/A	N/A	N/A		N/A	N/A
65	Processed	190801-3-065	Unknown		False	E0372									Confirmed	C10[13]CH11N2[15]NO2S	SCNBimaneIS	1908368	1	1	N/A	Internal Standard	493396	1.8	1.81	0.01	M-H	1	250.05	250.05	0.359	True	N/A	N/A	N/A	Method	N/A	N/A			Pass	Pass	Pass	N/A	Pass	98.7468	3 of 4	N/A	N/A
66	Processed	190801-3-066	Unknown		False	E 72									NotFound		SCNBimane	N/F	N/F	N/A	N/A	Target Compound	N/F	1.8	N/F		N/A	N/F	248.05	N/F	N/F	True	N/F	1	1858552	Method	N/A	N/A		PPB	Fail	N/A	N/A	N/A	N/A	N/A		N/A	N/A
66	Processed	190801-3-066	Unknown		False	E 72									Confirmed	C10[13]CH11N2[15]NO2S	SCNBimaneIS	1858552	1	1	N/A	Internal Standard	473963	1.8	1.82	0.02	M-H	1	250.05	250.05	-0.0071	True	N/A	N/A	N/A	Method	N/A	N/A			Pass	Pass	Pass	N/A	Pass	100	3 of 3	N/A	N/A
67	Processed	190801-3-067	Unknown		False	Blank									Identified	C11H11N3O2S	SCNBimane	9448	0.719	N/A	N/A	Target Compound	4941	1.8	1.84	0.04	M-H	0.719	248.05	248.05	-0.1573	True	0.004	1	2517745	Method	N/A	N/A		PPB	Pass	Pass	Fail	N/A	Fail	100	1 of 1	N/A	N/A
67	Processed	190801-3-067	Unknown		False	Blank									Confirmed	C10[13]CH11N2[15]NO2S	SCNBimaneIS	2517745	1	1	N/A	Internal Standard	648677	1.8	1.82	0.02	M-H	1	250.05	250.05	0.4201	True	N/A	N/A	N/A	Method	N/A	N/A			Pass	Pass	Pass	N/A	Pass	92.3242	3 of 5	N/A	N/A
[truncated: 12 more columns]

## Sheet: Data
Sample Type	Level	Sample ID	Area	IS Area	Ratio	Calculated Amt	Concentration Ratio
Unknown		A0136		1918293
Unknown		A0236	18873	1626211	0.012	0.938	0.0127932
Unknown		A0336	11268	1243737	0.009	0.867	0.0103806
Unknown		A0436		1340232
Unknown		A0536	9903	1129955	0.009	0.859	0.0104773
Unknown		A0636		1044774
Unknown		A0736		1016047
Unknown		A0836		743640
Unknown		A0936		678829
Unknown		A1036		360533
Unknown		C0136	8582	2106479	0.004	0.728	0.00549451
Unknown		C0236	6333	1733833	0.004	0.716	0.00558659
Unknown		C0336		1629341
Unknown		E0136		1163151
Unknown		E0236		1051664
Unknown		E0336		734562
Unknown		25 ppb STD	283040	300883	0.941	26.929	0.0349437
Unknown		Blank		221151
Unknown		A0148	14570	2276546	0.006	0.793	0.0075662
Unknown		A0248	11299	2263758	0.005	0.753	0.00664011
Unknown		A0348		2213721
Unknown		A0448		2174088
Unknown		A0548		801420
Unknown		A0648		1915880
Unknown		A0748		1564387
Unknown		A0848		1328704
Unknown		A0948		983599
Unknown		A1048		744579
Unknown		C0148	10753	2126434	0.005	0.755	0.00662252
Unknown		C0248		2203920
Unknown		C0348		2209942
Unknown		E0148		1372702
Unknown		E0248		1030622
Unknown		E0348		698810
Unknown		E48		197386
Unknown		50 ppb STD	482372	212466	2.27	64.124	0.0354002
Unknown		A0172	20881	2174922	0.01	0.882	0.0113379
Unknown		A0272	5993	2119314	0.003	0.693	0.004329
Unknown		A0372		1844445
Unknown		A0472		1962118
Unknown		A0572		1800351
Unknown		C0172		787368
Unknown		C0272		476900
Unknown		C0372		135865
Unknown		E0172		2322292
Unknown		E0272		2065328
Unknown		E0372		1908368
Unknown		E 72		1858552
Unknown		Blank	9448	2517745	0.004	0.719	0.00556328
